# Supplementary material for: A tensor decomposition-based integrated analysis applicable to multiple gene expression profiles without sample matching
Source: Research Square preprint supplement (doi:10.21203/rs.3.rs-766884/v2), 2021-11-03
Supplement: Supplementary file 2 [file 6aabd20464c672f8cccb44b2.xlsx]

## Sheet: Sheet1
	rownames.mat_all..1....p.adjust.P...BH.....0.01.
1	ENSG00000189337
2	ENSG00000127603
3	ENSG00000187147
4	ENSG00000186094
5	ENSG00000173406
6	ENSG00000162599
7	ENSG00000184588
8	ENSG00000033122
9	ENSG00000172260
10	ENSG00000116147
11	ENSG00000075391
12	ENSG00000198626
13	ENSG00000133019
14	ENSG00000182901
15	ENSG00000186487
16	ENSG00000183023
17	ENSG00000179915
18	ENSG00000176204
19	ENSG00000066032
20	ENSG00000144218
21	ENSG00000071054
22	ENSG00000175497
23	ENSG00000155052
24	ENSG00000168702
25	ENSG00000157827
26	ENSG00000144290
27	ENSG00000170396
28	ENSG00000078018
29	ENSG00000178568
30	ENSG00000144619
31	ENSG00000196277
32	ENSG00000151789
33	ENSG00000187672
34	ENSG00000144724
35	ENSG00000163618
36	ENSG00000185008
37	ENSG00000175161
38	ENSG00000181722
39	ENSG00000185565
40	ENSG00000239268
41	ENSG00000145087
42	ENSG00000169282
43	ENSG00000283154
44	ENSG00000169760
45	ENSG00000114279
46	ENSG00000185774
47	ENSG00000169851
48	ENSG00000150471
49	ENSG00000184305
50	ENSG00000152208
51	ENSG00000120251
52	ENSG00000168843
53	ENSG00000174473
54	ENSG00000150625
55	ENSG00000078295
56	ENSG00000169862
57	ENSG00000183580
58	ENSG00000133401
59	ENSG00000079215
60	ENSG00000164588
61	ENSG00000185305
62	ENSG00000113448
63	ENSG00000112851
64	ENSG00000081189
65	ENSG00000164199
66	ENSG00000175471
67	ENSG00000112893
68	ENSG00000183775
69	ENSG00000156475
70	ENSG00000155511
71	ENSG00000145934
72	ENSG00000112137
73	ENSG00000151914
74	ENSG00000112232
75	ENSG00000135298
76	ENSG00000185760
77	ENSG00000164418
78	ENSG00000010810
79	ENSG00000112531
80	ENSG00000146555
81	ENSG00000122584
82	ENSG00000005108
83	ENSG00000136267
84	ENSG00000158321
85	ENSG00000185274
86	ENSG00000183166
87	ENSG00000187416
88	ENSG00000128512
89	ENSG00000184408
90	ENSG00000174469
91	ENSG00000130226
92	ENSG00000155093
93	ENSG00000169933
94	ENSG00000198947
95	ENSG00000198010
96	ENSG00000183117
97	ENSG00000164741
98	ENSG00000185053
99	ENSG00000156687
100	ENSG00000147481
101	ENSG00000147488
102	ENSG00000206579
103	ENSG00000184672
104	ENSG00000176406
105	ENSG00000164830
106	ENSG00000164796
107	ENSG00000184156
108	ENSG00000131773
109	ENSG00000107249
110	ENSG00000153707
111	ENSG00000083067
112	ENSG00000070214
113	ENSG00000148219
114	ENSG00000187398
115	ENSG00000110436
116	ENSG00000148948
117	ENSG00000245532
118	ENSG00000251562
119	ENSG00000150672
120	ENSG00000168959
121	ENSG00000184384
122	ENSG00000149972
123	ENSG00000152578
124	ENSG00000182985
125	ENSG00000182667
126	ENSG00000183715
127	ENSG00000185736
128	ENSG00000151474
129	ENSG00000078114
130	ENSG00000150867
131	ENSG00000120549
132	ENSG00000148498
133	ENSG00000150275
134	ENSG00000151150
135	ENSG00000183230
136	ENSG00000185737
137	ENSG00000095637
138	ENSG00000107518
139	ENSG00000151067
140	ENSG00000273079
141	ENSG00000198673
142	ENSG00000155974
143	ENSG00000166006
144	ENSG00000067715
145	ENSG00000179104
146	ENSG00000185046
147	ENSG00000151952
148	ENSG00000132932
149	ENSG00000132938
150	ENSG00000172915
151	ENSG00000184226
152	ENSG00000179399
153	ENSG00000185352
154	ENSG00000102466
155	ENSG00000204442
156	ENSG00000151322
157	ENSG00000139915
158	ENSG00000182732
159	ENSG00000021645
160	ENSG00000182256
161	ENSG00000198838
162	ENSG00000078328
163	ENSG00000186153
164	ENSG00000153944
165	ENSG00000154229
166	ENSG00000154217
167	ENSG00000170579
168	ENSG00000134769
169	ENSG00000196628
170	ENSG00000101542
171	ENSG00000081913
172	ENSG00000182621
173	ENSG00000172264
174	ENSG00000141837
175	ENSG00000185666
176	ENSG00000215386
177	ENSG00000171189
178	ENSG00000171587

## Sheet: Sheet2
From	To	Species	Gene Name
ENSG00000158321	AUTS2	Homo sapiens	autism susceptibility candidate 2(AUTS2)
ENSG00000245532	NEAT1	Homo sapiens	nuclear paraspeckle assembly transcript 1 (non-protein coding)(NEAT1)
ENSG00000005108	THSD7A	Homo sapiens	thrombospondin type 1 domain containing 7A(THSD7A)
ENSG00000198626	RYR2	Homo sapiens	ryanodine receptor 2(RYR2)
ENSG00000067715	SYT1	Homo sapiens	synaptotagmin 1(SYT1)
ENSG00000155974	GRIP1	Homo sapiens	glutamate receptor interacting protein 1(GRIP1)
ENSG00000145934	TENM2	Homo sapiens	teneurin transmembrane protein 2(TENM2)
ENSG00000144724	PTPRG	Homo sapiens	protein tyrosine phosphatase, receptor type G(PTPRG)
ENSG00000206579	XKR4	Homo sapiens	XK related 4(XKR4)
ENSG00000153707	PTPRD	Homo sapiens	protein tyrosine phosphatase, receptor type D(PTPRD)
ENSG00000169862	CTNND2	Homo sapiens	catenin delta 2(CTNND2)
ENSG00000186487	MYT1L	Homo sapiens	myelin transcription factor 1 like(MYT1L)
ENSG00000185274	WBSCR17	Homo sapiens	Williams-Beuren syndrome chromosome region 17(WBSCR17)
ENSG00000081189	MEF2C	Homo sapiens	myocyte enhancer factor 2C(MEF2C)
ENSG00000155052	CNTNAP5	Homo sapiens	contactin associated protein like 5(CNTNAP5)
ENSG00000184588	PDE4B	Homo sapiens	phosphodiesterase 4B(PDE4B)
ENSG00000149972	CNTN5	Homo sapiens	contactin 5(CNTN5)
ENSG00000128512	DOCK4	Homo sapiens	dedicator of cytokinesis 4(DOCK4)
ENSG00000183775	KCTD16	Homo sapiens	potassium channel tetramerization domain containing 16(KCTD16)
ENSG00000184226	pcdh9	Homo sapiens	protocadherin 9(PCDH9)
ENSG00000134769	DTNA	Homo sapiens	dystrobrevin alpha(DTNA)
ENSG00000175471	MCTP1	Homo sapiens	multiple C2 and transmembrane domain containing 1(MCTP1)
ENSG00000150275	PCDH15	Homo sapiens	protocadherin related 15(PCDH15)
ENSG00000107249	GLIS3	Homo sapiens	GLIS family zinc finger 3(GLIS3)
ENSG00000070214	SLC44A1	Homo sapiens	solute carrier family 44 member 1(SLC44A1)
ENSG00000141837	CACNA1A	Homo sapiens	calcium voltage-gated channel subunit alpha1 A(CACNA1A)
ENSG00000179399	GPC5	Homo sapiens	glypican 5(GPC5)
ENSG00000196277	GRM7	Homo sapiens	glutamate metabotropic receptor 7(GRM7)
ENSG00000136267	DGKB	Homo sapiens	diacylglycerol kinase beta(DGKB)
ENSG00000135298	ADGRB3	Homo sapiens	adhesion G protein-coupled receptor B3(ADGRB3)
ENSG00000176204	LRRTM4	Homo sapiens	leucine rich repeat transmembrane neuronal 4(LRRTM4)
ENSG00000153944	MSI2	Homo sapiens	musashi RNA binding protein 2(MSI2)
ENSG00000150672	DLG2	Homo sapiens	discs large MAGUK scaffold protein 2(DLG2)
ENSG00000152578	GRIA4	Homo sapiens	glutamate ionotropic receptor AMPA type subunit 4(GRIA4)
ENSG00000131773	KHDRBS3	Homo sapiens	KH RNA binding domain containing, signal transduction associated 3(KHDRBS3)
ENSG00000078295	ADCY2	Homo sapiens	adenylate cyclase 2(ADCY2)
ENSG00000170579	DLGAP1	Homo sapiens	DLG associated protein 1(DLGAP1)
ENSG00000172915	NBEA	Homo sapiens	neurobeachin(NBEA)
ENSG00000151914	DST	Homo sapiens	dystonin(DST)
ENSG00000145087	STXBP5L	Homo sapiens	syntaxin binding protein 5 like(STXBP5L)
ENSG00000185666	SYN3	Homo sapiens	synapsin III(SYN3)
ENSG00000101542	CDH20	Homo sapiens	cadherin 20(CDH20)
ENSG00000078328	RBFOX1	Homo sapiens	RNA binding protein, fox-1 homolog 1(RBFOX1)
ENSG00000185305	ARL15	Homo sapiens	ADP ribosylation factor like GTPase 15(ARL15)
ENSG00000164741	DLC1	Homo sapiens	DLC1 Rho GTPase activating protein(DLC1)
ENSG00000164588	HCN1	Homo sapiens	hyperpolarization activated cyclic nucleotide gated potassium channel 1(HCN1)
ENSG00000166006	KCNC2	Homo sapiens	potassium voltage-gated channel subfamily C member 2(KCNC2)
ENSG00000168702	LRP1B	Homo sapiens	LDL receptor related protein 1B(LRP1B)
ENSG00000151474	FRMD4A	Homo sapiens	FERM domain containing 4A(FRMD4A)
ENSG00000152208	GRID2	Homo sapiens	glutamate ionotropic receptor delta type subunit 2(GRID2)
ENSG00000154229	PRKCA	Homo sapiens	protein kinase C alpha(PRKCA)
ENSG00000133401	PDZD2	Homo sapiens	PDZ domain containing 2(PDZD2)
ENSG00000116147	TNR	Homo sapiens	tenascin R(TNR)
ENSG00000075391	RASAL2	Homo sapiens	RAS protein activator like 2(RASAL2)
ENSG00000164199	ADGRV1	Homo sapiens	adhesion G protein-coupled receptor V1(ADGRV1)
ENSG00000185053	SGCZ	Homo sapiens	sarcoglycan zeta(SGCZ)
ENSG00000083067	TRPM3	Homo sapiens	transient receptor potential cation channel subfamily M member 3(TRPM3)
ENSG00000169760	nlgn1	Homo sapiens	neuroligin 1(NLGN1)
ENSG00000168959	GRM5	Homo sapiens	glutamate metabotropic receptor 5(GRM5)
ENSG00000251562	MALAT1	Homo sapiens	metastasis associated lung adenocarcinoma transcript 1 (non-protein coding)(MALAT1)
ENSG00000182621	PLCB1	Homo sapiens	phospholipase C beta 1(PLCB1)
ENSG00000215386	MIR99AHG	Homo sapiens	mir-99a-let-7c cluster host gene(MIR99AHG)
ENSG00000185736	ADARB2	Homo sapiens	adenosine deaminase, RNA specific B2 (inactive)(ADARB2)
ENSG00000182985	CADM1	Homo sapiens	cell adhesion molecule 1(CADM1)
ENSG00000133019	CHRM3	Homo sapiens	cholinergic receptor muscarinic 3(CHRM3)
ENSG00000172260	NEGR1	Homo sapiens	neuronal growth regulator 1(NEGR1)
ENSG00000151067	CACNA1C	Homo sapiens	calcium voltage-gated channel subunit alpha1 C(CACNA1C)
ENSG00000139915	MDGA2	Homo sapiens	MAM domain containing glycosylphosphatidylinositol anchor 2(MDGA2)
ENSG00000156475	PPP2R2B	Homo sapiens	protein phosphatase 2 regulatory subunit Bbeta(PPP2R2B)
ENSG00000175497	DPP10	Homo sapiens	dipeptidyl peptidase like 10(DPP10)
ENSG00000172264	MACROD2	Homo sapiens	MACRO domain containing 2(MACROD2)
ENSG00000110436	SLC1A2	Homo sapiens	solute carrier family 1 member 2(SLC1A2)
ENSG00000147481	SNTG1	Homo sapiens	syntrophin gamma 1(SNTG1)
ENSG00000112851	ERBIN	Homo sapiens	erbb2 interacting protein(ERBIN)
ENSG00000154217	PITPNC1	Homo sapiens	phosphatidylinositol transfer protein, cytoplasmic 1(PITPNC1)
ENSG00000186094	AGBL4	Homo sapiens	ATP/GTP binding protein like 4(AGBL4)
ENSG00000168843	FSTL5	Homo sapiens	follistatin like 5(FSTL5)
ENSG00000148219	ASTN2	Homo sapiens	astrotactin 2(ASTN2)
ENSG00000185046	ANKS1B	Homo sapiens	ankyrin repeat and sterile alpha motif domain containing 1B(ANKS1B)
ENSG00000183023	SLC8A1	Homo sapiens	solute carrier family 8 member A1(SLC8A1)
ENSG00000185565	LSAMP	Homo sapiens	limbic system-associated membrane protein(LSAMP)
ENSG00000147488	ST18	Homo sapiens	ST18, C2H2C-type zinc finger(ST18)
ENSG00000146555	SDK1	Homo sapiens	sidekick cell adhesion molecule 1(SDK1)
ENSG00000182732	RGS6	Homo sapiens	regulator of G-protein signaling 6(RGS6)
ENSG00000169933	FRMPD4	Homo sapiens	FERM and PDZ domain containing 4(FRMPD4)
ENSG00000179104	TMTC2	Homo sapiens	transmembrane and tetratricopeptide repeat containing 2(TMTC2)
ENSG00000132932	ATP8A2	Homo sapiens	ATPase phospholipid transporting 8A2(ATP8A2)
ENSG00000071054	map4k4	Homo sapiens	mitogen-activated protein kinase kinase kinase kinase 4(MAP4K4)
ENSG00000171189	GRIK1	Homo sapiens	glutamate ionotropic receptor kainate type subunit 1(GRIK1)
ENSG00000171587	DSCAM	Homo sapiens	DS cell adhesion molecule(DSCAM)
ENSG00000198947	DMD	Homo sapiens	dystrophin(DMD)
ENSG00000184384	MAML2	Homo sapiens	mastermind like transcriptional coactivator 2(MAML2)
ENSG00000185352	HS6ST3	Homo sapiens	heparan sulfate 6-O-sulfotransferase 3(HS6ST3)
ENSG00000164418	GRIK2	Homo sapiens	glutamate ionotropic receptor kainate type subunit 2(GRIK2)
ENSG00000155093	PTPRN2	Homo sapiens	protein tyrosine phosphatase, receptor type N2(PTPRN2)
ENSG00000187416	LHFPL3	Homo sapiens	lipoma HMGIC fusion partner-like 3(LHFPL3)
ENSG00000162599	NFIA	Homo sapiens	nuclear factor I A(NFIA)
ENSG00000184305	CCSER1	Homo sapiens	coiled-coil serine rich protein 1(CCSER1)
ENSG00000150471	ADGRL3	Homo sapiens	adhesion G protein-coupled receptor L3(ADGRL3)
ENSG00000185737	NRG3	Homo sapiens	neuregulin 3(NRG3)
ENSG00000198010	ERICH1-AS1	Homo sapiens	ERICH1 antisense RNA 1(ERICH1-AS1)
ENSG00000182901	RGS7	Homo sapiens	regulator of G-protein signaling 7(RGS7)
ENSG00000183715	OPCML	Homo sapiens	opioid binding protein/cell adhesion molecule like(OPCML)
ENSG00000066032	CTNNA2	Homo sapiens	catenin alpha 2(CTNNA2)
ENSG00000184408	KCND2	Homo sapiens	potassium voltage-gated channel subfamily D member 2(KCND2)
ENSG00000157827	FMNL2	Homo sapiens	formin like 2(FMNL2)
ENSG00000113448	PDE4D	Homo sapiens	phosphodiesterase 4D(PDE4D)
ENSG00000078018	MAP2	Homo sapiens	microtubule associated protein 2(MAP2)
ENSG00000179915	NRXN1	Homo sapiens	neurexin 1(NRXN1)
ENSG00000151322	NPAS3	Homo sapiens	neuronal PAS domain protein 3(NPAS3)
ENSG00000021645	NRXN3	Homo sapiens	neurexin 3(NRXN3)
ENSG00000176406	RIMS2	Homo sapiens	regulating synaptic membrane exocytosis 2(RIMS2)
ENSG00000112232	KHDRBS2	Homo sapiens	KH RNA binding domain containing, signal transduction associated 2(KHDRBS2)
ENSG00000174469	CNTNAP2	Homo sapiens	contactin associated protein-like 2(CNTNAP2)
ENSG00000196628	TCF4	Homo sapiens	transcription factor 4(TCF4)
ENSG00000186153	WWOX	Homo sapiens	WW domain containing oxidoreductase(WWOX)
ENSG00000173406	DAB1	Homo sapiens	DAB1, reelin adaptor protein(DAB1)
ENSG00000150625	GPM6A	Homo sapiens	glycoprotein M6A(GPM6A)
ENSG00000150867	PIP4K2A	Homo sapiens	phosphatidylinositol-5-phosphate 4-kinase type 2 alpha(PIP4K2A)
ENSG00000079215	SLC1A3	Homo sapiens	solute carrier family 1 member 3(SLC1A3)
ENSG00000122584	NXPH1	Homo sapiens	neurexophilin 1(NXPH1)
ENSG00000132938	MTUS2	Homo sapiens	microtubule associated tumor suppressor candidate 2(MTUS2)
ENSG00000183166	CALN1	Homo sapiens	calneuron 1(CALN1)
ENSG00000155511	GRIA1	Homo sapiens	glutamate ionotropic receptor AMPA type subunit 1(GRIA1)
ENSG00000156687	UNC5D	Homo sapiens	unc-5 netrin receptor D(UNC5D)
ENSG00000175161	CADM2	Homo sapiens	cell adhesion molecule 2(CADM2)
ENSG00000174473	GALNTL6	Homo sapiens	polypeptide N-acetylgalactosaminyltransferase-like 6(GALNTL6)
ENSG00000163618	CADPS	Homo sapiens	calcium dependent secretion activator(CADPS)
ENSG00000107518	ATRNL1	Homo sapiens	attractin like 1(ATRNL1)
ENSG00000151150	ANK3	Homo sapiens	ankyrin 3(ANK3)
ENSG00000144619	CNTN4	Homo sapiens	contactin 4(CNTN4)
ENSG00000170396	ZNF804A	Homo sapiens	zinc finger protein 804A(ZNF804A)
ENSG00000151952	TMEM132D	Homo sapiens	transmembrane protein 132D(TMEM132D)
ENSG00000169282	KCNAB1	Homo sapiens	potassium voltage-gated channel subfamily A member regulatory beta subunit 1(KCNAB1)
ENSG00000081913	PHLPP1	Homo sapiens	PH domain and leucine rich repeat protein phosphatase 1(PHLPP1)
ENSG00000273079	GRIN2B	Homo sapiens	glutamate ionotropic receptor NMDA type subunit 2B(GRIN2B)
ENSG00000148948	LRRC4C	Homo sapiens	leucine rich repeat containing 4C(LRRC4C)
ENSG00000198838	RYR3	Homo sapiens	ryanodine receptor 3(RYR3)
ENSG00000033122	LRRC7	Homo sapiens	leucine rich repeat containing 7(LRRC7)
ENSG00000183230	CTNNA3	Homo sapiens	catenin alpha 3(CTNNA3)
ENSG00000187672	ERC2	Homo sapiens	ELKS/RAB6-interacting/CAST family member 2(ERC2)
ENSG00000187398	LUZP2	Homo sapiens	leucine zipper protein 2(LUZP2)
ENSG00000120251	GRIA2	Homo sapiens	glutamate ionotropic receptor AMPA type subunit 2(GRIA2)
ENSG00000185774	KCNIP4	Homo sapiens	potassium voltage-gated channel interacting protein 4(KCNIP4)
ENSG00000095637	sorbs1	Homo sapiens	sorbin and SH3 domain containing 1(SORBS1)
ENSG00000127603	MACF1	Homo sapiens	microtubule-actin crosslinking factor 1(MACF1)
ENSG00000102466	FGF14	Homo sapiens	fibroblast growth factor 14(FGF14)
ENSG00000189337	KAZN	Homo sapiens	kazrin, periplakin interacting protein(KAZN)
ENSG00000164830	OXR1	Homo sapiens	oxidation resistance 1(OXR1)
ENSG00000164796	CSMD3	Homo sapiens	CUB and Sushi multiple domains 3(CSMD3)
ENSG00000183117	CSMD1	Homo sapiens	CUB and Sushi multiple domains 1(CSMD1)
ENSG00000182667	NTM	Homo sapiens	neurotrimin(NTM)
ENSG00000130226	DPP6	Homo sapiens	dipeptidyl peptidase like 6(DPP6)
ENSG00000144290	SLC4A10	Homo sapiens	solute carrier family 4 member 10(SLC4A10)
ENSG00000198673	FAM19A2	Homo sapiens	family with sequence similarity 19 member A2, C-C motif chemokine like(FAM19A2)
ENSG00000078114	NEBL	Homo sapiens	nebulette(NEBL)
ENSG00000112531	QKI	Homo sapiens	QKI, KH domain containing RNA binding(QKI)
ENSG00000204442	FAM155A	Homo sapiens	family with sequence similarity 155 member A(FAM155A)
ENSG00000151789	ZNF385D	Homo sapiens	zinc finger protein 385D(ZNF385D)
ENSG00000112137	PHACTR1	Homo sapiens	phosphatase and actin regulator 1(PHACTR1)
ENSG00000178568	ERBB4	Homo sapiens	erb-b2 receptor tyrosine kinase 4(ERBB4)
ENSG00000114279	FGF12	Homo sapiens	fibroblast growth factor 12(FGF12)
ENSG00000112893	MAN2A1	Homo sapiens	mannosidase alpha class 2A member 1(MAN2A1)
ENSG00000144218	AFF3	Homo sapiens	AF4/FMR2 family member 3(AFF3)
ENSG00000183580	FBXL7	Homo sapiens	F-box and leucine rich repeat protein 7(FBXL7)
ENSG00000120549	KIAA1217	Homo sapiens	KIAA1217(KIAA1217)
ENSG00000169851	PCDH7	Homo sapiens	protocadherin 7(PCDH7)
ENSG00000187147	RNF220	Homo sapiens	ring finger protein 220(RNF220)
ENSG00000184672	RALYL	Homo sapiens	RALY RNA binding protein-like(RALYL)
ENSG00000185760	KCNQ5	Homo sapiens	potassium voltage-gated channel subfamily Q member 5(KCNQ5)
ENSG00000184156	KCNQ3	Homo sapiens	potassium voltage-gated channel subfamily Q member 3(KCNQ3)
ENSG00000182256	GABRG3	Homo sapiens	gamma-aminobutyric acid type A receptor gamma3 subunit(GABRG3)
ENSG00000148498	PARD3	Homo sapiens	par-3 family cell polarity regulator(PARD3)
ENSG00000185008	ROBO2	Homo sapiens	roundabout guidance receptor 2(ROBO2)
ENSG00000010810	FYN	Homo sapiens	FYN proto-oncogene, Src family tyrosine kinase(FYN)
ENSG00000181722	ZBTB20	Homo sapiens	zinc finger and BTB domain containing 20(ZBTB20)

## Sheet: dbGAP
Term	Overlap	P-value	Adjusted P-value	Old P-value	Old Adjusted P-value	Odds Ratio	Combined Score	Genes
Frontal Lobe	3/3	6.69936e-07	2.25057e-06	0	0	59472	845459	ROBO2;CNTN5;ERBB4
Phosphatidylcholines	2/3	0.000229664	0.000493777	0	0	227.851	1909.14	RBFOX1;FGF12
Autistic Disorder	2/3	0.000229664	0.000493777	0	0	227.851	1909.14	AUTS2;MACROD2
Neurotic Disorders	3/6	1.31402e-05	3.36326e-05	0	0	114.572	1287.77	PDE4D;NXPH1;MDGA2
Mental Disorders	3/6	1.31402e-05	3.36326e-05	0	0	114.572	1287.77	PTPRN2;ERC2;NPAS3
Parietal Lobe	2/4	0.000456667	0.000917603	0	0	113.92	876.218	CSMD1;TRPM3
Epilepsies, Partial	2/4	0.000456667	0.000917603	0	0	113.92	876.218	PTPRD;ZNF385D
Tissue Plasminogen Activator	3/7	2.28464e-05	5.58179e-05	0	0	85.9249	918.255	DPP6;NEGR1;NBEA
Hand Strength	4/10	1.16776e-06	3.53618e-06	0	0	76.814	1049.31	WBSCR17;ATRNL1;PCDH15;CSMD1
Receptors, Tumor Necrosis Factor, Type II	4/10	1.16776e-06	3.53618e-06	0	0	76.814	1049.31	NRG3;DLGAP1;CACNA1C;SGCZ
Response to radiation	2/5	0.000756706	0.00146569	0	0	75.9425	545.764	WWOX;ADARB2
Apolipoproteins E	3/8	3.63176e-05	8.77335e-05	0	0	68.7364	702.707	PDE4B;AFF3;SGCZ
Ocular Physiological Phenomena	2/6	0.00112849	0.0021663	0	0	56.954	386.54	DMD;RGS6
Benzodiazepines	1/3	0.0261695	0.037016	0	0	56.6343	206.328	ANKS1B
Gallbladder Neoplasms	1/3	0.0261695	0.037016	0	0	56.6343	206.328	CNTN4
Myopia	1/3	0.0261695	0.037016	0	0	56.6343	206.328	CTNND2
Blood Viscosity	1/3	0.0261695	0.037016	0	0	56.6343	206.328	MDGA2
Vascular Calcification	1/3	0.0261695	0.037016	0	0	56.6343	206.328	PHACTR1
Carcinoid Tumor	1/3	0.0261695	0.037016	0	0	56.6343	206.328	FGF12
Dengue Hemorrhagic Fever	1/3	0.0261695	0.037016	0	0	56.6343	206.328	RBFOX1
Cystatins	4/13	3.89464e-06	1.07352e-05	0	0	51.2016	637.762	FAM155A;DLG2;PDE4D;CCSER1
Calcium-Binding Proteins	4/13	3.89464e-06	1.07352e-05	0	0	51.2016	637.762	ROBO2;RBFOX1;DLG2;PDE4D
Survival	3/10	7.68195e-05	0.000177593	0	0	49.0925	465.105	CNTNAP2;TCF4;NPAS3
Phosphorus	3/10	7.68195e-05	0.000177593	0	0	49.0925	465.105	GALNTL6;ERC2;MDGA2
Angiography	3/10	7.68195e-05	0.000177593	0	0	49.0925	465.105	MYT1L;TRPM3;OPCML
Audiometry, Pure-Tone	4/14	5.41507e-06	1.47372e-05	0	0	46.0791	558.77	FAM155A;WBSCR17;MIR99AHG;DMD
Gallbladder Diseases	2/7	0.00157075	0.00293663	0	0	45.5609	294.15	NTM;HS6ST3
Respiration Disorders	2/7	0.00157075	0.00293663	0	0	45.5609	294.15	DOCK4;GRM7
Subcutaneous Fat	2/8	0.00208223	0.00373067	0	0	37.9655	234.411	ATP8A2;ANKS1B
Intra-Abdominal Fat	1/4	0.0347405	0.0466825	0	0	37.7543	126.849	CADPS
Intelligence	1/4	0.0347405	0.0466825	0	0	37.7543	126.849	CNTN4
Restless Legs Syndrome	1/4	0.0347405	0.0466825	0	0	37.7543	126.849	PTPRD
Sexual Dysfunctions, Psychological	1/4	0.0347405	0.0466825	0	0	37.7543	126.849	MDGA2
Risperidone	1/4	0.0347405	0.0466825	0	0	37.7543	126.849	CNTNAP5
Asperger Syndrome	1/4	0.0347405	0.0466825	0	0	37.7543	126.849	NTM
Chemokine CCL2	1/4	0.0347405	0.0466825	0	0	37.7543	126.849	DLG2
Adiponectin	6/25	6.57175e-08	2.56896e-07	0	0	36.7895	608.421	CNTNAP2;AUTS2;NRG3;ARL15;TNR;ASTN2
Body Weight Changes	8/34	4.5782e-10	2.89504e-09	0	0	36.2601	779.756	GRIA1;KCNIP4;NRXN3;MACROD2;PLCB1;SGCZ;SLC8A1;CNTNAP5
Apolipoproteins B	6/26	8.48117e-08	3.0906e-07	0	0	34.9482	569.056	RBFOX1;FRMPD4;PDE4D;PLCB1;TRPM3;LRP1B
Sleep	8/35	5.89046e-10	3.61842e-09	0	0	34.9153	742.039	DSCAM;PDE4D;GRIK1;DLGAP1;CSMD1;RGS6;ANKS1B;OPCML
Interleukin-6	3/13	0.000179558	0.000393929	0	0	34.3595	296.351	CHRM3;MIR99AHG;GABRG3
Lipoproteins, VLDL	18/86	3.75086e-20	7.33123e-19	0	0	33.0983	1480.48	RBFOX1;PCDH9;NEBL;MIR99AHG;CADPS;NRXN3;GRIK2;SGCZ;GRIN2B;LRP1B;PTPRD;DMD;CTNNA3;CNTN4;LRRC4C;MDGA2;XKR4;FGF12
Natriuretic Peptide, Brain	4/18	1.61041e-05	4.02602e-05	0	0	32.907	363.176	CHRM3;NFIA;KCNIP4;ST18
Diabetic Retinopathy	2/9	0.0026617	0.00465256	0	0	32.5402	192.924	RBFOX1;HS6ST3
Neoplasms	2/9	0.0026617	0.00465256	0	0	32.5402	192.924	FSTL5;RBFOX1
Aspartate Aminotransferases	2/9	0.0026617	0.00465256	0	0	32.5402	192.924	KHDRBS2;TENM2
Erythrocytes	11/52	7.90101e-13	7.10073e-12	0	0	32.1675	896.399	FAM155A;RBFOX1;DAB1;NRG3;CTNND2;NTM;KCNIP4;DMD;MACROD2;GALNTL6;CNTN4
Exercise Test	14/68	8.06377e-16	9.12479e-15	0	0	31.6392	1099.59	RYR2;FRMPD4;MIR99AHG;KCNIP4;PCDH15;AFF3;SGCZ;RYR3;NPAS3;DMD;CNTN4;MDGA2;CSMD1;OPCML
Aorta	7/34	1.59619e-08	7.00367e-08	0	0	30.3702	545.237	WWOX;RALYL;PCDH9;NRG3;MACROD2;THSD7A;QKI
Leukocyte Count	8/40	1.85407e-09	9.96561e-09	0	0	29.4524	592.166	PTPRD;RYR2;RBFOX1;CTNND2;GRIK1;DLGAP1;SORBS1;ANKS1B
Obesity	5/25	2.29625e-06	6.67154e-06	0	0	28.9532	375.935	WWOX;PCDH9;LHFPL3;MACROD2;RGS6
Precursor Cell Lymphoblastic Leukemia-Lymphoma	2/10	0.00330792	0.00564447	0	0	28.4713	162.612	MAML2;DGKB
Occipital Lobe	2/10	0.00330792	0.00564447	0	0	28.4713	162.612	KCND2;SGCZ
Factor VII	1/5	0.0432364	0.0566819	0	0	28.3143	88.9372	ERBB4
Lipids	16/87	4.45619e-17	5.63576e-16	0	0	27.8211	1047.46	CADM1;SYT1;FRMPD4;NRXN1;NTM;KCNIP4;GLIS3;SGCZ;PTPRG;PTPRD;CCSER1;CNTN4;MDGA2;CSMD1;ANKS1B;RGS7
Platelet Aggregation	5/27	3.43974e-06	9.86057e-06	0	0	26.3184	331.089	SDK1;CNTN5;MAP2;CNTN4;SGCZ
Creatinine	16/92	1.14212e-16	1.3642e-15	0	0	25.9842	953.841	RBFOX1;GRID2;PCDH9;FRMD4A;ANK3;CACNA1C;RYR3;NPAS3;PTPRD;FMNL2;GRM7;PHACTR1;DLGAP1;ERC2;OPCML;RNF220
Glomerular Filtration Rate	8/45	5.0059e-09	2.50295e-08	0	0	25.4659	486.721	PTPRD;CHRM3;FMNL2;ZNF385D;ANK3;SGCZ;NPAS3;RNF220
Memory	2/11	0.0040197	0.00654723	0	0	25.3065	139.605	ROBO2;DMD
Carotid Arteries	2/11	0.0040197	0.00654723	0	0	25.3065	139.605	LRRTM4;ZNF385D
Apolipoprotein A-I	2/11	0.0040197	0.00654723	0	0	25.3065	139.605	PPP2R2B;PDE4D
Brain	6/34	4.67358e-07	1.59495e-06	0	0	24.9529	363.718	PTPRD;FGF14;CNTN5;SNTG1;KCNIP4;SGCZ
Eosinophils	8/46	6.01462e-09	2.87365e-08	0	0	24.7945	469.337	ROBO2;PTPRD;RBFOX1;DAB1;GLIS3;ERC2;SYN3;SGCZ
Mental Competency	7/42	7.54441e-08	2.79663e-07	0	0	23.4189	384.068	KIAA1217;DPP6;NEGR1;PDE4D;LSAMP;GPC5;ASTN2
Cell Adhesion Molecules	8/49	1.01646e-08	4.55289e-08	0	0	22.9768	422.873	ROBO2;MYT1L;CTNNA2;CSMD1;GRIN2B;FGF12;CNTNAP5;PTPRG
Urinalysis	3/18	0.000495981	0.00098737	0	0	22.9006	174.25	DLGAP1;GRIK2;MACROD2
Gout	2/12	0.00479584	0.00763781	0	0	22.7747	121.617	AGBL4;GRIK2
Life Expectancy	2/12	0.00479584	0.00763781	0	0	22.7747	121.617	SYT1;ZBTB20
Leukemia, Lymphoid	2/12	0.00479584	0.00763781	0	0	22.7747	121.617	RYR2;PARD3
Warfarin	1/6	0.051658	0.0638303	0	0	22.6503	67.1153	CACNA1C
Memory, Short-Term	1/6	0.051658	0.0638303	0	0	22.6503	67.1153	ANKS1B
Isoxazoles	1/6	0.051658	0.0638303	0	0	22.6503	67.1153	NRG3
Stomach Neoplasms	1/6	0.051658	0.0638303	0	0	22.6503	67.1153	ZBTB20
Anorexia Nervosa	1/6	0.051658	0.0638303	0	0	22.6503	67.1153	FAM155A
Carcinoma, Non-Small-Cell Lung	1/6	0.051658	0.0638303	0	0	22.6503	67.1153	DSCAM
Luteinizing Hormone	1/6	0.051658	0.0638303	0	0	22.6503	67.1153	NBEA
Cleft Lip	1/6	0.051658	0.0638303	0	0	22.6503	67.1153	GRM7
Perphenazine	1/6	0.051658	0.0638303	0	0	22.6503	67.1153	ASTN2
Monocyte Chemoattractant Protein-1	1/6	0.051658	0.0638303	0	0	22.6503	67.1153	GPC5
Uric Acid	6/37	7.90397e-07	2.53635e-06	0	0	22.5347	316.629	TENM2;RBFOX1;SNTG1;ARL15;THSD7A;FGF12
Monocytes	6/37	7.90397e-07	2.53635e-06	0	0	22.5347	316.629	RBFOX1;PDZD2;NTM;CADPS;CSMD1;LRP1B
Glucose	22/147	4.98475e-21	1.07172e-19	0	0	22.5131	1052.44	TMEM132D;GPM6A;TENM2;ATRNL1;NTM;SYN3;GRIN2B;RYR3;PTPRG;RIMS2;PDZD2;DLG2;NRG3;CDH20;MAN2A1;GPC5;CNTN4;GALNTL6;CTNNA2;ASTN2;ERC2;RGS7
Tunica Media	16/104	8.77828e-16	9.43666e-15	0	0	22.4273	777.533	TMEM132D;WWOX;CNTN5;NTM;PRKCA;MSI2;CACNA1C;SGCZ;NPAS3;PTPRD;SDK1;NXPH1;ZNF385D;CSMD1;CNTNAP5;OPCML
Diabetes Mellitus	11/70	2.46906e-11	1.83051e-10	0	0	22.3333	545.483	ROBO2;PTPRD;CNTNAP2;WWOX;PDE4D;NXPH1;CSMD3;CSMD1;SGCZ;FBXL7;OPCML
Body Fat Distribution	9/57	1.61292e-09	8.89173e-09	0	0	22.2036	449.517	DAB1;FGF14;DST;DLGAP1;CCSER1;GALNTL6;ADARB2;AFF3;CSMD1
Forced Expiratory Volume	9/57	1.61292e-09	8.89173e-09	0	0	22.2036	449.517	RIMS2;PTPRD;MAML2;DGKB;LRRTM4;NRXN3;OXR1;NPAS3;RNF220
Carotid Artery Diseases	6/38	9.31782e-07	2.94608e-06	0	0	21.8294	303.127	ROBO2;CNTNAP2;PCDH9;PDE4B;ZBTB20;RYR3
Lipoproteins	12/79	4.53616e-12	3.9011e-11	0	0	21.5766	563.559	PTPRD;GPM6A;PTPRN2;CNTN5;CTNND2;NRXN1;NTM;GRIK2;MACROD2;ZNF385D;CSMD1;KCTD16
Cholesterol, HDL	45/357	3.14206e-39	6.75543e-37	0	0	21.4827	1904.57	DPP10;ROBO2;KHDRBS2;TENM2;MAML2;NRXN1;PCDH15;ZBTB20;GRIK2;AFF3;NPAS3;FSTL5;DPP6;GRM7;ERBB4;PDE4B;GPC5;DMD;NXPH1;CTNNA2;CSMD3;ERC2;CSMD1;TRPM3;ANKS1B;WWOX;RBFOX1;GRID2;PTPRN2;SYT1;PCDH9;NEGR1;ARL15;PDE4D;LSAMP;MTUS2;UNC5D;SGCZ;PTPRD;DLG2;NRG3;PPP2R2B;DLC1;KCNQ3;CNTN4
Hip	28/202	1.36909e-25	4.90592e-24	0	0	21.3653	1223.18	CTNND2;NTM;PCDH15;TMTC2;NPAS3;PTPRG;DPP6;DLGAP1;PHACTR1;GPC5;DMD;MACROD2;CSMD3;CSMD1;RGS6;CALN1;AUTS2;CNTN5;NEGR1;PDE4D;SGCZ;ST18;PTPRD;DLG2;NRG3;PARD3;CCSER1;GALNTL6
Blood Flow Velocity	4/26	7.44692e-05	0.000177593	0	0	20.9323	198.965	WWOX;PPP2R2B;NRXN3;PDE4B
Maximal Midexpiratory Flow Rate	2/13	0.00563516	0.00877942	0	0	20.7032	107.216	PTPRD;MTUS2
Blood Proteins	2/13	0.00563516	0.00877942	0	0	20.7032	107.216	AGBL4;OPCML
Atrial Fibrillation	2/13	0.00563516	0.00877942	0	0	20.7032	107.216	RBFOX1;CNTN5
Thyrotropin	5/33	9.68942e-06	2.57188e-05	0	0	20.6725	238.653	DPP10;SDK1;LUZP2;CADM2;PHACTR1
Schizophrenia	12/82	7.17334e-12	5.7121e-11	0	0	20.6488	529.861	WWOX;ERBB4;ZNF804A;TCF4;CCSER1;MACROD2;ANK3;CACNA1C;CSMD1;PTPRG;CALN1;OPCML
Respiratory Function Tests	21/151	1.97262e-19	3.26242e-18	0	0	20.5248	883.997	DPP10;CHRM3;WWOX;RBFOX1;DOCK4;TENM2;DSCAM;CADM1;SYT1;SLC44A1;CADM2;ATRNL1;GLIS3;PTPRD;AGBL4;PDZD2;NRG3;SNTG1;THSD7A;FBXL7;OPCML
Neuropsychological Tests	4/27	8.68223e-05	0.000198583	0	0	20.0212	187.232	TMEM132D;FGF14;PPP2R2B;DLGAP1
Echocardiography	34/273	2.22218e-29	1.53463e-27	0	0	19.6208	1294.51	CHRM3;CNTNAP2;MYT1L;DGKB;LUZP2;SLC1A2;GRIK2;ADARB2;HS6ST3;FSTL5;GRM7;ERBB4;PDE4B;DLGAP1;GPC5;CTNNA3;MACROD2;ZNF385D;CSMD1;TRPM3;RBFOX1;DSCAM;NEGR1;PDE4D;CADPS;KCNIP4;KAZN;SGCZ;PTPRD;RALYL;DLG2;NRG3;CNTN4;XKR4
Pulse	5/35	1.3066e-05	3.36326e-05	0	0	19.2924	216.953	RYR2;KHDRBS2;MEF2C;MIR99AHG;CTNNA3
Albumins	6/43	1.98407e-06	5.8435e-06	0	0	18.8747	247.832	GRID2;PTPRN2;MAN2A1;SYN3;CSMD1;GRIA4
Abdominal Fat	1/7	0.0600059	0.0720741	0	0	18.8743	53.0993	NRXN3
Intuition	1/7	0.0600059	0.0720741	0	0	18.8743	53.0993	WWOX
Peroxidase	1/7	0.0600059	0.0720741	0	0	18.8743	53.0993	PDE4D
Panic Disorder	1/7	0.0600059	0.0720741	0	0	18.8743	53.0993	GRM7
Suntan	1/7	0.0600059	0.0720741	0	0	18.8743	53.0993	GRM5
Insulin Resistance	8/58	4.03909e-08	1.67001e-07	0	0	18.8324	320.615	PCDH9;LRRTM4;FAM19A2;FYN;CTNNA2;GALNTL6;LRRC4C;CSMD1
Arteries	12/89	1.94884e-11	1.49643e-10	0	0	18.765	462.767	PTPRD;FSTL5;RBFOX1;GRM7;LSAMP;DLGAP1;MSI2;MACROD2;ANK3;CTNNA2;SORBS1;AFF3
Heart Rate	20/155	6.79336e-18	9.12858e-17	0	0	18.698	739.143	CNTNAP2;DOCK4;MAML2;CNTN5;DST;CADM2;SGCZ;PTPRG;WBSCR17;DPP6;RALYL;GRM5;DLG2;NFIA;MAP2;PPP2R2B;ZNF385D;CTNNA2;CSMD1;OPCML
Magnesium	9/66	6.20117e-09	2.89837e-08	0	0	18.6893	353.199	DTNA;FGF14;NRG3;LUZP2;GLIS3;LRRC4C;CSMD1;RYR3;ANKS1B
Asthma	14/107	5.91803e-13	5.78353e-12	0	0	18.3349	516.231	TMEM132D;CTNND2;PDE4D;PCDH15;GLIS3;MTUS2;ADCY2;GRIN2B;NPAS3;PTPRD;NRG3;CTNNA3;LRRC4C;CSMD1
Amyotrophic Lateral Sclerosis	10/76	1.24548e-09	7.43829e-09	0	0	18.034	369.764	AGBL4;RBFOX1;DPP6;KCNIP4;PDE4B;DLGAP1;DMD;GRIK2;CNTN4;GRIN2B
Body Weight	26/216	3.37017e-22	9.05734e-21	0	0	17.9117	885.59	ROBO2;CNTNAP2;ATP8A2;MCTP1;GRIK1;NPAS3;GRM7;ERBB4;DMD;CTNNA3;THSD7A;CTNNA2;CSMD1;TRPM3;WWOX;SYT1;ARL15;ATRNL1;KAZN;SYN3;PTPRD;DLG2;FGF14;NBEA;NRG3;GALNTL6
Hematocrit	8/61	6.06775e-08	2.41587e-07	0	0	17.7637	295.192	PTPRD;FAM155A;DPP6;DLGAP1;DMD;MACROD2;CACNA1C;CSMD1
Fibrinogen	11/86	2.47239e-10	1.77188e-09	0	0	17.5547	388.321	ROBO2;CNTN5;ERBB4;CTNND2;PDE4B;KAZN;GRIK2;GALNTL6;CNTN4;ASTN2;CNTNAP5
Heart Function Tests	2/15	0.00749876	0.0114343	0	0	17.5164	85.7078	NFIA;PRKCA
Cardiomegaly	2/15	0.00749876	0.0114343	0	0	17.5164	85.7078	MEF2C;MIR99AHG
Platelet Count	7/54	4.53183e-07	1.57152e-06	0	0	17.4291	254.586	GRIP1;RALYL;MACROD2;SORBS1;CNTN4;SGCZ;NPAS3
Blood Pressure	47/454	5.46719e-37	5.87723e-35	0	0	17.3818	1451.33	DPP10;ROBO2;RYR2;CNTNAP2;DOCK4;FRMPD4;LUZP2;CTNND2;NRXN1;SLC1A3;GRIK2;AFF3;RYR3;PDE4B;TNR;DMD;CTNNA3;MACROD2;ZNF385D;CTNNA2;CSMD1;OPCML;TMEM132D;WWOX;MEF2C;DSCAM;AUTS2;NEGR1;CADPS;KCNIP4;MTUS2;KAZN;FRMD4A;SYN3;SGCZ;LRP1B;PTPRD;FAM155A;DAB1;FMNL2;NRG3;CCSER1;GALNTL6;CNTN4;XKR4;MDGA2;CNTNAP5
Cholesterol, LDL	34/304	8.69838e-28	3.7403e-26	0	0	17.3405	1080.48	ROBO2;CNTNAP2;LUZP2;NRXN1;GLIS3;SLC1A3;RYR3;RIMS2;FSTL5;ERBB4;FAM19A2;PHACTR1;DMD;NXPH1;ANKS1B;RGS7;RBFOX1;PCDH9;PDE4D;KCNIP4;PRKCA;ANK3;GABRG3;SGCZ;PTPRD;FAM155A;RALYL;DAB1;NRG3;KCNQ5;CNTN4;ASTN2;MDGA2;CNTNAP5
Electrocardiography	11/87	2.80884e-10	1.94807e-09	0	0	17.3228	380.982	PTPRD;RYR2;DOCK4;MIR99AHG;SLC1A2;FRMD4A;CTNNA3;THSD7A;SYN3;CSMD1;ANKS1B
Triglycerides	28/244	2.84669e-23	8.74341e-22	0	0	17.1742	891.568	GPM6A;DOCK4;FRMPD4;NTM;NRXN1;PCDH15;GLIS3;GRIK2;GRM7;FYN;NXPH1;ERC2;CSMD1;RGS7;PCDH9;PDE4D;KCNIP4;ANK3;SGCZ;KIAA1217;PTPRD;WBSCR17;DAB1;CCSER1;GALNTL6;MDGA2;FBXL7;CNTNAP5
C-Reactive Protein	11/88	3.18584e-10	2.14048e-09	0	0	17.097	373.862	DPP10;KIAA1217;WWOX;PTPRN2;KCNQ3;DMD;NXPH1;CSMD3;CNTN4;RGS6;NPAS3
Cardiovascular Diseases	4/31	0.000151448	0.000335683	0	0	17.0517	149.974	WWOX;ZNF385D;ANKS1B;OPCML
Osteoporosis	4/31	0.000151448	0.000335683	0	0	17.0517	149.974	CNTNAP2;PPP2R2B;DMD;LRP1B
Alzheimer Disease	10/80	2.08433e-09	1.093e-08	0	0	17	339.81	CNTNAP2;RYR2;RBFOX1;WBSCR17;DAB1;ERBB4;CADPS;GRIN2B;PITPNC1;NPAS3
Insulin	11/89	3.60765e-10	2.35044e-09	0	0	16.8769	366.951	PTPRD;WWOX;LRRTM4;MAP2;FAM19A2;DMD;FYN;SYN3;ASTN2;LRRC4C;LRP1B
Glucose Transporter Type 2	1/8	0.0682807	0.0815575	0	0	16.1771	43.4215	GLIS3
monocyte chemoattractant protein 1 (66-77) [Supplementary Concept]	7/58	7.46974e-07	2.47076e-06	0	0	16.0588	226.546	PTPRD;LUZP2;ERBB4;MAN2A1;NRXN3;SGCZ;RYR3
Varicose Veins	2/17	0.00960139	0.0145373	0	0	15.1793	70.5208	ERC2;NPAS3
Calcium	7/61	1.06007e-06	3.30312e-06	0	0	15.1644	208.619	DSCAM;CNTN5;KCNQ5;CSMD1;SGCZ;NPAS3;OPCML
Hemoglobins	17/157	4.38629e-14	4.49073e-13	0	0	15.0327	462.372	RBFOX1;DGKB;ATRNL1;FRMD4A;CACNA1C;GRIK2;PTPRD;FAM155A;DPP6;DLG2;NBEA;NRG3;KCNQ3;CNTN4;ZNF385D;MDGA2;CSMD1
Albuminuria	3/26	0.00150073	0.00285538	0	0	14.9291	97.0662	CCSER1;NPAS3;HS6ST3
Inflammatory Bowel Diseases	4/35	0.000245204	0.00052197	0	0	14.8485	123.441	RBFOX1;TMTC2;CACNA1C;GALNTL6
Elbow	8/72	2.27158e-07	8.13982e-07	0	0	14.7024	224.911	PTPRD;CNTNAP2;NRG3;NRXN1;NTM;KCNIP4;FRMD4A;ADARB2
Coronary Disease	9/82	4.35252e-08	1.76565e-07	0	0	14.5812	247.15	PTPRD;WWOX;RBFOX1;RALYL;AUTS2;NRXN3;KAZN;PHACTR1;CSMD1
Bipolar Disorder	11/102	1.59461e-09	8.89173e-09	0	0	14.4564	292.838	DPP10;GPM6A;CNTNAP2;WWOX;RBFOX1;MCTP1;DMD;ANK3;CACNA1C;ZNF385D;NPAS3
Body Mass Index	40/437	2.85512e-29	1.53463e-27	0	0	14.3925	945.96	RYR2;NLGN1;MCTP1;CTNND2;NRXN3;TMTC2;GRIK1;ADARB2;NPAS3;PTPRG;DPP6;GRM7;FAM19A2;DLGAP1;DMD;THSD7A;CTNNA2;CSMD1;ANKS1B;OPCML;WWOX;MEF2C;GRID2;AUTS2;SYT1;CNTN5;DST;PCDH9;CADM2;KCNIP4;OXR1;LRP1B;PTPRD;FAM155A;DAB1;NRG3;GALNTL6;CNTN4;ASTN2;CNTNAP5
Diabetic Nephropathies	4/36	0.000273972	0.000566384	0	0	14.3837	117.982	NEGR1;NRXN1;NRXN3;FGF12
Blood Pressure Determination	7/64	1.47636e-06	4.40858e-06	0	0	14.3641	192.851	SDK1;RALYL;KCNIP4;NRXN3;ADARB2;ASTN2;GABRG3
Waist-Hip Ratio	10/93	9.27008e-09	4.24057e-08	0	0	14.3279	265.016	CNTNAP2;PCDH7;SLC1A3;KCNAB1;FYN;MACROD2;CTNNA2;CSMD3;LRP1B;OPCML
Myocardial Infarction	23/229	6.04616e-18	8.66617e-17	0	0	14.3161	567.591	TMEM132D;ROBO2;WWOX;NLGN1;MCTP1;MAML2;CNTN5;DGKB;ARL15;CTNND2;MIR99AHG;SGCZ;NPAS3;GRIP1;SDK1;FAM155A;DLG2;PHACTR1;CTNNA3;MACROD2;ERC2;TRPM3;ANKS1B
Inflammation	3/27	0.00167747	0.00310911	0	0	14.3064	91.4243	DPP10;CSMD1;PTPRG
Stroke	28/289	3.04538e-21	7.27506e-20	0	0	14.1805	669.896	GRIA1;DPP10;CNTNAP2;NTM;ADCY2;CACNA1C;ADARB2;PITPNC1;RYR3;GRM5;PDE4B;PIP4K2A;GPC5;CSMD1;TRPM3;CNTN5;KCNIP4;FRMD4A;LHFPL3;PTPRD;FAM155A;RALYL;DLG2;NBEA;KCNQ3;ASTN2;PLCB1;CNTNAP5
Neurobehavioral Manifestations	1/9	0.0764831	0.0884079	0	0	14.1543	36.3862	ATRNL1
Apolipoproteins C	1/9	0.0764831	0.0884079	0	0	14.1543	36.3862	ASTN2
Esophageal Neoplasms	1/9	0.0764831	0.0884079	0	0	14.1543	36.3862	PDE4D
Walking	1/9	0.0764831	0.0884079	0	0	14.1543	36.3862	FAM155A
Erectile Dysfunction	1/9	0.0764831	0.0884079	0	0	14.1543	36.3862	LRP1B
Alanine Transaminase	1/9	0.0764831	0.0884079	0	0	14.1543	36.3862	CTNND2
Hypertrophy, Left Ventricular	6/56	9.61295e-06	2.57188e-05	0	0	13.9581	161.25	ROBO2;WWOX;ERBB4;KCNIP4;CTNNA3;LHFPL3
HIV-1	4/37	0.000305084	0.000624696	0	0	13.9471	112.901	GRM5;DAB1;NBEA;GPC5
Body Weights and Measures	9/87	7.33673e-08	2.76736e-07	0	0	13.643	224.125	KHDRBS2;ERBB4;ATRNL1;CADPS;PCDH15;GLIS3;DLGAP1;UNC5D;ANKS1B
Attention Deficit Disorder with Hyperactivity	10/99	1.70822e-08	7.34536e-08	0	0	13.3579	238.91	RBFOX1;GRM5;CNTN5;MYT1L;LRRC7;MIR99AHG;KCNIP4;GRIK1;ASTN2;XKR4
Cholesterol	25/268	1.19862e-18	1.84074e-17	0	0	13.3411	550.525	DPP10;ROBO2;CNTNAP2;TENM2;DOCK4;NRXN1;AFF3;DLGAP1;PHACTR1;CTNNA3;MACROD2;RGS7;OPCML;TMEM132D;WWOX;AUTS2;PDE4D;CADPS;KCNIP4;PRKCA;SGCZ;PTPRD;NRG3;ASTN2;FBXL7
Blood Coagulation Factors	3/29	0.00206871	0.00373067	0	0	13.2045	81.615	DAB1;CNTN5;PDE4D
Iron	15/154	6.84143e-12	5.65733e-11	0	0	13.1943	339.199	CADPS;GRIK2;SGCZ;SLC8A1;PTPRD;NBEA;GRM7;LRRTM4;DLC1;FAM19A2;KCNQ5;DLGAP1;THSD7A;CSMD1;CNTNAP5
Lipoproteins, HDL	6/61	1.58526e-05	4.00978e-05	0	0	12.686	140.208	DPP10;RYR2;MACF1;PCDH15;CCSER1;CTNNA2
Nonalcoholic Fatty Liver Disease	2/20	0.0131842	0.0196848	0	0	12.6475	54.7477	RBFOX1;MACROD2
Erythrocyte Count	11/115	5.77061e-09	2.81973e-08	0	0	12.641	239.806	PTPRD;TENM2;NRG3;NEGR1;DGKB;DLC1;KCNQ3;PCDH15;CNTN4;CSMD3;CSMD1
Antidepressive Agents	1/10	0.0846137	0.0967657	0	0	12.581	31.0707	DMD
gamma-Glutamylcyclotransferase	1/10	0.0846137	0.0967657	0	0	12.581	31.0707	WBSCR17
Bone Density	7/73	3.6232e-06	1.02498e-05	0	0	12.3997	155.345	CNTNAP2;FAM155A;FGF14;DGKB;ERBB4;DLC1;CSMD1
Heart Failure	17/187	7.92639e-13	7.10073e-12	0	0	12.361	344.42	CNTNAP2;TENM2;GRID2;CNTN5;NTM;MTUS2;GRIN2B;KIAA1217;PTPRD;SDK1;DLG2;FGF14;PPP2R2B;KCNQ3;DLGAP1;ERC2;FBXL7
Lymphocytes	4/44	0.00059776	0.00116835	0	0	11.5023	85.374	PTPRD;NEGR1;NEBL;GLIS3
Vitamin D	1/11	0.0926731	0.104318	0	0	11.3223	26.9321	PTPRD
Transferrin	1/11	0.0926731	0.104318	0	0	11.3223	26.9321	LUZP2
Dehydroepiandrosterone	1/11	0.0926731	0.104318	0	0	11.3223	26.9321	CTNNA3
Body Height	30/385	5.47433e-20	9.80818e-19	0	0	11.269	499.797	GRIA1;DPP10;ROBO2;RYR2;NLGN1;MCTP1;NTM;SLC1A2;SLC1A3;GRIP1;FSTL5;THSD7A;CSMD1;RGS6;WWOX;RBFOX1;CNTN5;PCDH9;PDE4D;PRKCA;SYN3;LRP1B;PTPRD;DLG2;LRRC7;KCNQ3;CCSER1;CNTN4;FGF12;FBXL7
Hemoglobin A, Glycosylated	11/128	1.78826e-08	7.53876e-08	0	0	11.2291	200.32	DPP10;WWOX;WBSCR17;DPP6;DSCAM;NRG3;KCNIP4;NRXN3;AFF3;LRP1B;NPAS3
Breast Neoplasms	5/57	0.000144148	0.000326231	0	0	11.1179	98.3338	ERBB4;PCDH15;GRIK1;NPAS3;HCN1
Forced Vital Capacity	3/34	0.00328058	0.00564447	0	0	11.072	63.3288	RIMS2;MAML2;GALNTL6
Socioeconomic Factors	3/35	0.00356514	0.00603548	0	0	10.7254	60.4545	RBFOX1;SGCZ;RGS6
Body Composition	3/36	0.00386434	0.00649089	0	0	10.3999	57.7814	MCTP1;PDE4D;NPAS3
Personality	1/12	0.100662	0.11042	0	0	10.2925	23.6314	GRM7
P-Selectin	1/12	0.100662	0.11042	0	0	10.2925	23.6314	HS6ST3
Intercellular Adhesion Molecule-1	1/12	0.100662	0.11042	0	0	10.2925	23.6314	CSMD1
Lung Neoplasms	1/12	0.100662	0.11042	0	0	10.2925	23.6314	GPC5
Hypertension	5/64	0.000249789	0.000526515	0	0	9.79532	81.2512	MYT1L;LRRC7;NRXN3;LHFPL3;ASTN2
Parkinson Disease	10/132	2.66624e-07	9.3974e-07	0	0	9.72842	147.263	DLG2;NEGR1;FRMPD4;FRMD4A;CTNNA3;MACROD2;GABRG3;FGF12;CSMD1;SGCZ
Waist Circumference	11/146	7.01426e-08	2.69297e-07	0	0	9.72296	160.164	RYR2;FAM155A;DLG2;PCDH7;NRXN3;CTNNA3;CSMD3;RGS6;ANKS1B;NPAS3;PTPRG
Pancreatic Neoplasms	5/65	0.000268696	0.000560869	0	0	9.63158	79.1902	KIAA1217;DPP6;PRKCA;NXPH1;CTNNA2
Alcoholism	7/93	1.81767e-05	4.49193e-05	0	0	9.5064	103.766	KCND2;PPP2R2B;PRKCA;MACROD2;CTNNA2;NPAS3;HCN1
Death, Sudden, Cardiac	2/26	0.0217894	0.0323084	0	0	9.48276	36.2842	GRIA1;MAML2
Glucose Tolerance Test	1/13	0.108581	0.117904	0	0	9.43429	20.9466	GLIS3
Follicle Stimulating Hormone	1/13	0.108581	0.117904	0	0	9.43429	20.9466	DSCAM
Coronary Artery Disease	14/205	3.89537e-09	1.99406e-08	0	0	8.88314	172.008	WWOX;RBFOX1;NRXN3;SGCZ;PTPRG;DLC1;DLGAP1;PHACTR1;GPC5;FYN;MACROD2;CTNNA2;ASTN2;RGS7
Mortality	1/14	0.11643	0.125792	0	0	8.70813	18.7265	GPM6A
Neutrophils	4/58	0.00169805	0.00312035	0	0	8.51421	54.306	DPP10;PTPRD;DSCAM;GLIS3
Prostatic Neoplasms	5/75	0.000523119	0.00103184	0	0	8.25146	62.3456	FSTL5;PIP4K2A;TMTC2;SGCZ;SLC8A1
Longevity	2/32	0.0321343	0.045156	0	0	7.58391	26.0722	NRXN1;GRIN2B
Conduct Disorder	1/16	0.131924	0.141818	0	0	7.54629	15.2852	RBFOX1
Erythrocyte Indices	3/51	0.0102389	0.0153942	0	0	7.14451	32.733	ROBO2;CTNNA3;GALNTL6
Carotid Stenosis	1/17	0.139569	0.14929	0	0	7.07429	13.9306	CNTN5
Potassium	2/35	0.0378958	0.0506062	0	0	6.89342	22.5616	MSI2;THSD7A
Lipoproteins, LDL	2/36	0.0398977	0.0529506	0	0	6.69033	21.5525	GLIS3;TRPM3
Kidney Diseases	1/18	0.147147	0.156617	0	0	6.65782	12.7585	RYR2
CD40 Ligand	1/19	0.154659	0.163802	0	0	6.28762	11.736	CNTN5
Neuroblastoma	5/101	0.00199881	0.0036419	0	0	6.00877	37.3457	SDK1;RALYL;DLGAP1;NXPH1;LRP1B
Sodium	1/21	0.169486	0.177754	0	0	5.65829	10.0434	CSMD1
Diabetes Mellitus, Type 2	4/86	0.00702923	0.0108726	0	0	5.59898	27.7579	PTPRD;GLIS3;PRKCA;PTPRG
Celiac Disease	1/23	0.184054	0.192096	0	0	5.14338	8.70529	NFIA
Macular Degeneration	5/118	0.00391865	0.00653108	0	0	5.1004	28.2665	ARL15;SNTG1;MAP2;SYN3;CSMD1
Blood Cells	1/25	0.198369	0.204063	0	0	4.71429	7.62596	NXPH1
Menarche	1/25	0.198369	0.204063	0	0	4.71429	7.62596	LRP1B
Bilirubin	1/25	0.198369	0.204063	0	0	4.71429	7.62596	FMNL2
Depressive Disorder, Major	1/26	0.205432	0.210323	0	0	4.52549	7.16222	GRM7
Lupus Erythematosus, Systemic	3/86	0.0403156	0.053177	0	0	4.12445	13.2437	DLG2;NEGR1;CTNNA3
Hippocampus	1/29	0.226252	0.230541	0	0	4.04	6.00386	ASTN2
Behcet Syndrome	2/59	0.095196	0.1066	0	0	3.98609	9.37455	GPM6A;CSMD1
Phospholipids	1/32	0.24653	0.250019	0	0	3.64848	5.10886	DLG2
Multiple Sclerosis	2/82	0.162703	0.171476	0	0	2.83678	5.15112	GPC5;CSMD1
Arthritis, Rheumatoid	1/59	0.40682	0.41064	0	0	1.94739	1.75145	MDGA2
Diabetes Mellitus, Type 1	1/75	0.485292	0.487559	0	0	1.5251	1.10265	GLIS3
Metabolism	1/83	0.520565	0.520565	0	0	1.37575	0.898146	DPP10

## Sheet: Human Gene Atlas
Term	Overlap	P-value	Adjusted P-value	Old P-value	Old Adjusted P-value	Odds Ratio	Combined Score	Genes
PrefrontalCortex	33/521	3.64106e-19	2.18464e-17	0	0	9.14376	388.215	CHRM3;GRIA2;MACF1;RYR2;CNTNAP2;MCTP1;CTNND2;SLC1A2;CACNA1A;SLC1A3;ADCY2;NPAS3;RIMS2;PDZD2;CTNNA2;ERC2;TRPM3;RGS7;MAP4K4;OPCML;DTNA;SYT1;PCDH9;ATRNL1;PCDH7;PRKCA;ANK3;SORBS1;FAM155A;RALYL;FMNL2;TCF4;PLCB1
Amygdala	21/345	3.66314e-12	1.09894e-10	0	0	8.15412	214.72	GRIA1;DPP10;GPM6A;GRIA2;DOCK4;NLGN1;DTNA;SYT1;PCDH9;CTNND2;PRKCA;KCNAB1;OXR1;LRP1B;NPAS3;WBSCR17;DPP6;GRM5;GRM7;FAM19A2;FGF12
OccipitalLobe	6/35	5.59956e-07	1.11991e-05	0	0	24.0913	346.804	DPP10;PTPRD;GRIA2;SYT1;ATRNL1;FGF12
pineal night	20/674	2.14176e-06	3.21264e-05	0	0	3.75794	49.0557	ROBO2;CNTNAP2;PHLPP1;CADM1;DST;NTM;PDE4D;NRXN1;LSAMP;MTUS2;ADCY2;GRIK2;SLC8A1;ST18;RYR3;MAP2;ERBB4;ASTN2;RGS6;TRPM3
Fetalbrain	13/325	6.41023e-06	7.69228e-05	0	0	4.98773	59.6414	GRIA1;MEF2C;AUTS2;MYT1L;NRXN1;PTPRD;RALYL;GRM5;NBEA;GRM7;TCF4;THSD7A;OPCML
pineal day	18/694	4.27365e-05	0.000427365	0	0	3.22695	32.4646	ROBO2;PHLPP1;CADM1;DST;NTM;PDE4D;LSAMP;MTUS2;ADCY2;SLC8A1;ST18;RYR3;MAP2;ERBB4;PPP2R2B;GPC5;ASTN2;FGF12
SuperiorCervicalGanglion	16/602	8.72862e-05	0.000748168	0	0	3.28294	30.6834	MYT1L;NEBL;LUZP2;PCDH7;PRKCA;GRIK2;QKI;RIMS2;KIAA1217;NFIA;SNTG1;DLC1;PDE4B;DMD;ZNF385D;CSMD3
Cerebellum	6/108	0.000388643	0.00291482	0	0	6.82422	53.5896	WWOX;FGF14;CACNA1A;PHACTR1;UNC5D;TRPM3
Wholebrain	8/240	0.00132177	0.00812571	0	0	4.02135	26.6566	CNTNAP2;WBSCR17;PTPRN2;LRRC7;ATRNL1;SLC1A2;RNF220;HCN1
CerebellumPeduncles	6/137	0.00135429	0.00812571	0	0	5.3057	35.0414	KCND2;NRXN3;CACNA1A;AFF3;TRPM3;CALN1
ParietalLobe	3/26	0.00150073	0.00818581	0	0	14.9291	97.0662	FRMPD4;PIP4K2A;CSMD1
Caudatenucleus	4/69	0.00321069	0.0160535	0	0	7.06941	40.5874	SDK1;MCTP1;DGKB;KCNAB1
SubthalamicNucleus	4/77	0.00476063	0.0219721	0	0	6.29213	33.6464	NLGN1;SORBS1;PLCB1;STXBP5L
Appendix	5/127	0.00534643	0.0229133	0	0	4.72198	24.7022	DST;LRRTM4;DMD;CSMD3;TRPM3
AtrioventricularNode	7/269	0.00991581	0.0396632	0	0	3.0926	14.2681	FSTL5;LRRC7;PHACTR1;CNTN4;CSMD3;CSMD1;RGS7
Spinalcord	4/105	0.0139226	0.0522096	0	0	4.54133	19.4108	DTNA;FMNL2;SLC44A1;QKI
SkeletalMuscle	9/441	0.0163758	0.0577971	0	0	2.41916	9.94747	KIAA1217;KHDRBS2;NEBL;KCNC2;PCDH7;TNR;NXPH1;GRIN2B;RGS6
Thalamus	3/79	0.0325547	0.108516	0	0	4.50593	15.4321	DPP6;CNTN4;RGS6
CiliaryGanglion	6/278	0.0367062	0.110653	0	0	2.53702	8.38438	NBEA;DST;ATRNL1;CSMD3;CSMD1;SGCZ
OlfactoryBulb	3/83	0.0368843	0.110653	0	0	4.27977	14.1231	PHACTR1;PRKCA;DMD
Hypothalamus	3/97	0.0542147	0.154899	0	0	3.63977	10.6092	DTNA;SLC44A1;MAP4K4
Salivarygland	2/57	0.0897951	0.244896	0	0	4.13145	9.95773	NEGR1;PHACTR1
Pons	1/27	0.212433	0.554173	0	0	4.35121	6.74058	CADPS
TrigeminalGanglion	3/196	0.248636	0.613518	0	0	1.76384	2.45486	NEBL;DLC1;DLGAP1
Skin	2/111	0.255632	0.613518	0	0	2.07898	2.83577	ATP8A2;CNTN4
CD19+ BCells(neg. sel.)	5/412	0.297364	0.686225	0	0	1.39496	1.6918	CNTNAP2;PDE4B;PHACTR1;AFF3;MAP4K4
GlobusPallidus	1/59	0.40682	0.885035	0	0	1.94739	1.75145	PHACTR1
CardiacMyocytes	3/273	0.43209	0.885035	0	0	1.25588	1.05383	GRIK1;SORBS1;ADARB2
Adrenalgland	1/65	0.437552	0.885035	0	0	1.76429	1.45829	UNC5D
FetalThyroid	1/66	0.442517	0.885035	0	0	1.73705	1.41618	FSTL5
Adipocyte	2/181	0.474452	0.918294	0	0	1.26148	0.940552	CSMD1;PTPRG
retina	2/218	0.57401	0.999544	0	0	1.04342	0.579212	DTNA;TRPM3
UterusCorpus	1/98	0.580349	0.999544	0	0	1.16212	0.63234	FSTL5
AdrenalCortex	1/106	0.60914	0.999544	0	0	1.07314	0.531965	CSMD1
Leukemialymphoblastic(MOLT-4)	1/118	0.648684	0.999544	0	0	0.962491	0.416575	PHACTR1
Placenta	3/405	0.69494	0.999544	0	0	0.837805	0.304902	PDZD2;PHACTR1;THSD7A
Lymphoma burkitts(Daudi)	1/139	0.70855	0.999544	0	0	0.815155	0.280849	ZNF804A
BronchialEpithelialCells	2/280	0.708745	0.999544	0	0	0.808153	0.278214	DST;PARD3
Heart	3/415	0.710602	0.999544	0	0	0.817049	0.279139	RYR2;CACNA1A;SORBS1
Colorectaladenocarcinoma	2/292	0.730314	0.999544	0	0	0.774237	0.243328	PDZD2;AUTS2
BDCA4+ DendriticCells	3/495	0.8144	0.999544	0	0	0.681376	0.139889	MAN2A1;TCF4;PHACTR1
Uterus	1/201	0.832304	0.999544	0	0	0.560686	0.102918	PDZD2
CD4+ Tcells	3/533	0.851567	0.999544	0	0	0.631279	0.101432	MACF1;MALAT1;FYN
small intestine	1/220	0.858483	0.999544	0	0	0.511546	0.0780562	AUTS2
Thyroid	2/388	0.858611	0.999544	0	0	0.578822	0.0882354	WWOX;KCNAB1
Prostate	1/249	0.890814	0.999544	0	0	0.45106	0.0521512	ZBTB20
colon	1/258	0.899267	0.999544	0	0	0.435064	0.0461932	SORBS1
Lung	1/299	0.930247	0.999544	0	0	0.37442	0.0270724	DLC1
TestisGermCell	1/314	0.939035	0.999544	0	0	0.356203	0.0224062	KHDRBS3
CD33+ Myeloid	3/679	0.940749	0.999544	0	0	0.491193	0.0300016	NEAT1;PLCB1;QKI
CD71+ EarlyErythroid	2/553	0.957439	0.999544	0	0	0.402049	0.0174863	NFIA;PIP4K2A
SmoothMuscle	1/363	0.960758	0.999544	0	0	0.307214	0.0122985	DLC1
TestisIntersitial	2/568	0.962001	0.999544	0	0	0.391089	0.0151507	KHDRBS3;CTNNA3
CD56+ NKCells	3/752	0.963648	0.999544	0	0	0.441629	0.0163531	MACF1;FYN;PITPNC1
CD14+ Monocytes	1/383	0.967227	0.999544	0	0	0.29083	0.00969102	PDZD2
Testis	1/384	0.967521	0.999544	0	0	0.290056	0.00957707	ATP8A2
CD34+	2/645	0.978953	0.999544	0	0	0.342879	0.00729346	MACF1;SLC8A1
WholeBlood	1/514	0.989974	0.999544	0	0	0.215104	0.00216759	PITPNC1
CD8+ Tcells	1/602	0.995494	0.999544	0	0	0.182772	0.000825345	FYN
721 B lymphoblasts	4/1543	0.999544	0.999544	0	0	0.276304	0.00012599	FSTL5;AUTS2;FRMD4A;DLGAP1

## Sheet: GO Cellular Component 2021
Term	Overlap	P-value	Adjusted P-value	Old P-value	Old Adjusted P-value	Odds Ratio	Combined Score	Genes
neuron projection (GO:0043005)	25/556	2.19232e-11	3.37617e-09	0	0	6.01545	147.64	GRIA1;CHRM3;GPM6A;GRIA2;CNTNAP2;TENM2;NLGN1;KCNC2;SLC1A3;ADCY2;SLC8A1;GRIP1;GRM7;MAP2;FYN;CTNNA2;DSCAM;SYT1;SLC4A10;ANK3;GABRG3;GRIN2B;DLG2;CNTN4;ADGRL3
dendrite (GO:0030425)	17/270	2.75472e-10	2.12113e-08	0	0	8.27074	182.06	GRIA1;CHRM3;GRIA2;CNTNAP2;TENM2;NLGN1;DSCAM;KCNC2;SLC4A10;ZNF804A;ADCY2;ANK3;GABRG3;SLC8A1;GRM7;MAP2;FYN
voltage-gated potassium channel complex (GO:0008076)	10/73	8.29325e-10	3.76515e-08	0	0	18.8956	395.114	DPP10;CNTNAP2;DPP6;KCND2;KCNC2;KCNIP4;KCNQ3;KCNAB1;KCNQ5;HCN1
integral component of plasma membrane (GO:0005887)	38/1454	9.7796e-10	3.76515e-08	0	0	3.57971	74.2631	DPP10;CHRM3;GRIA2;CNTNAP2;NLGN1;KCNC2;NRXN1;PCDH15;SLC1A2;NRXN3;SLC1A3;GRIK1;ADCY2;CACNA1C;GRIK2;SLC8A1;PTPRG;DPP6;GRM5;GRM7;ERBB4;TRPM3;GRID2;PTPRN2;KCND2;PCDH9;PCDH7;KCNIP4;KCNAB1;GABRG3;GRIN2B;PTPRD;NRG3;ADGRB3;KCNQ3;KCNQ5;HCN1;ADGRL3
potassium channel complex (GO:0034705)	10/80	2.08433e-09	5.78586e-08	0	0	17	339.81	DPP10;CNTNAP2;DPP6;KCND2;KCNC2;KCNIP4;KCNQ3;KCNAB1;KCNQ5;GRIK2
asymmetric synapse (GO:0032279)	12/133	2.25423e-09	5.78586e-08	0	0	11.9147	237.228	GRIA1;GRIA2;NLGN1;DLG2;GRM7;KCND2;LRRC7;CTNND2;FYN;CACNA1C;GRIN2B;SLC8A1
postsynaptic density (GO:0014069)	12/138	3.44435e-09	7.57757e-08	0	0	11.439	222.907	GRIA1;GRIA2;GRM5;NLGN1;DLG2;KCND2;LRRC7;CTNND2;FYN;CACNA1C;GRIN2B;SLC8A1
cation channel complex (GO:0034703)	8/73	2.53217e-07	4.87442e-06	0	0	14.4755	219.868	GRIA1;RYR2;GRIA2;PDE4D;KCNAB1;GRIN2B;RYR3;GRIA4
ionotropic glutamate receptor complex (GO:0008328)	6/32	3.19529e-07	5.4675e-06	0	0	26.8751	401.955	GRIA1;GRIA2;GRID2;GRIK2;GRIN2B;GRIA4
glutamatergic synapse (GO:0098978)	7/69	2.47109e-06	3.80547e-05	0	0	13.2023	170.453	PTPRD;NLGN1;NRG3;CADPS;DLGAP1;LRRC4C;ADGRL3
sarcolemma (GO:0042383)	6/52	6.20549e-06	8.68769e-05	0	0	15.1749	181.949	RYR2;DMD;ANK3;SGCZ;RYR3;SLC8A1
cell-cell junction (GO:0005911)	11/271	2.93759e-05	0.000376991	0	0	5.01641	52.3479	PDZD2;CADM1;CDH20;CTNND2;PARD3;KAZN;FRMD4A;CTNNA3;CTNNA2;SORBS1;ADGRL3
calcium channel complex (GO:0034704)	5/45	4.57997e-05	0.00054255	0	0	14.462	144.493	RYR2;PDE4D;PDE4B;CACNA1C;RYR3
basolateral plasma membrane (GO:0016323)	8/151	5.84733e-05	0.000643206	0	0	6.55378	63.8793	DLG2;CADM1;KCNC2;LRRC7;ERBB4;SLC4A10;ERBIN;ANK3
axon (GO:0030424)	9/204	8.37991e-05	0.000860338	0	0	5.42487	50.9238	CNTNAP2;DSCAM;SYT1;GRM7;KCNC2;CNTN4;CTNNA2;SLC8A1;ADGRL3
adherens junction (GO:0005912)	7/132	0.000169709	0.00163345	0	0	6.52748	56.6678	CDH20;CTNND2;PARD3;FRMD4A;CTNNA3;CTNNA2;SORBS1
exocytic vesicle membrane (GO:0099501)	4/41	0.000455169	0.00389422	0	0	12.4368	95.6995	MCTP1;PTPRN2;SYT1;SYN3
synaptic vesicle membrane (GO:0030672)	4/41	0.000455169	0.00389422	0	0	12.4368	95.6995	MCTP1;PTPRN2;SYT1;SYN3
membrane raft (GO:0045121)	7/163	0.000610695	0.00494984	0	0	5.22212	38.6485	KCND2;DLC1;SLC1A2;ADCY2;DMD;FYN;SORBS1
AMPA glutamate receptor complex (GO:0032281)	3/20	0.000684009	0.00501607	0	0	20.2044	147.24	GRIA1;GRIA2;GRIA4
postsynaptic density membrane (GO:0098839)	3/20	0.000684009	0.00501607	0	0	20.2044	147.24	GRM5;DLG2;GRIN2B
postsynaptic specialization membrane (GO:0099634)	3/21	0.000792869	0.00555008	0	0	19.0809	136.235	GRM5;DLG2;GRIN2B
cytoskeleton of presynaptic active zone (GO:0048788)	2/7	0.00157075	0.010079	0	0	45.5609	294.15	RIMS2;ERC2
hemidesmosome (GO:0030056)	2/7	0.00157075	0.010079	0	0	45.5609	294.15	DST;ERBIN
filopodium (GO:0030175)	4/58	0.00169805	0.01046	0	0	8.51421	54.306	GPM6A;TENM2;MAP2;DMD
dendrite membrane (GO:0032590)	3/29	0.00206871	0.0114523	0	0	13.2045	81.615	GRIA1;KCNC2;GABRG3
neuron to neuron synapse (GO:0098984)	2/8	0.00208223	0.0114523	0	0	37.9655	234.411	GRIA2;GRM7
integral component of synaptic membrane (GO:0099699)	2/8	0.00208223	0.0114523	0	0	37.9655	234.411	NLGN1;SLC1A2
intercalated disc (GO:0014704)	3/31	0.00251228	0.0128964	0	0	12.2601	73.396	CTNNA3;ANK3;SLC8A1
voltage-gated calcium channel complex (GO:0005891)	3/31	0.00251228	0.0128964	0	0	12.2601	73.396	PDE4D;PDE4B;CACNA1C
actin-based cell projection (GO:0098858)	4/83	0.00620731	0.0308363	0	0	5.81248	29.5392	GPM6A;WWOX;TENM2;DMD
glial cell projection (GO:0097386)	2/14	0.00653652	0.031457	0	0	18.977	95.461	SLC1A2;FYN
sarcoplasmic reticulum (GO:0016529)	3/45	0.00724941	0.0338306	0	0	8.16763	40.2406	RYR2;ANK3;RYR3
basement membrane (GO:0005604)	3/52	0.0107967	0.0485224	0	0	6.99835	31.6921	DST;ATRNL1;ERBIN
apical junction complex (GO:0043296)	4/98	0.0110278	0.0485224	0	0	4.88125	22.0014	PARD3;FRMD4A;ANK3;SORBS1
smooth endoplasmic reticulum (GO:0005790)	2/19	0.0119342	0.0510519	0	0	13.3922	59.3051	RYR2;RYR3
cortical cytoskeleton (GO:0030863)	3/58	0.0145091	0.060389	0	0	6.233	26.3842	RIMS2;DLC1;ERC2
excitatory synapse (GO:0060076)	2/25	0.0202287	0.0819796	0	0	9.89555	38.5991	GRIA2;NLGN1
synaptic membrane (GO:0097060)	2/26	0.0217894	0.0860402	0	0	9.48276	36.2842	GRIA1;GRIN2B
sarcoplasmic reticulum membrane (GO:0033017)	2/28	0.0250546	0.0964604	0	0	8.75243	32.2676	RYR2;RYR3
catenin complex (GO:0016342)	2/31	0.030298	0.113802	0	0	7.84582	27.4343	CDH20;CTNNA2
bicellular tight junction (GO:0005923)	3/78	0.0315165	0.11556	0	0	4.56624	15.7866	PARD3;FRMD4A;ANK3
intermediate filament cytoskeleton (GO:0045111)	3/84	0.0380107	0.136131	0	0	4.22672	13.8209	MACF1;DTNA;DST
tight junction (GO:0070160)	3/85	0.0391544	0.13704	0	0	4.17496	13.5279	PARD3;FRMD4A;ANK3
clathrin-sculpted monoamine transport vesicle (GO:0070081)	1/5	0.0432364	0.138343	0	0	28.3143	88.9372	SYT1
clathrin-sculpted monoamine transport vesicle membrane (GO:0070083)	1/5	0.0432364	0.138343	0	0	28.3143	88.9372	SYT1
sarcoglycan complex (GO:0016012)	1/5	0.0432364	0.138343	0	0	28.3143	88.9372	SGCZ
intrinsic component of presynaptic membrane (GO:0098889)	1/5	0.0432364	0.138343	0	0	28.3143	88.9372	SLC1A2
neuromuscular junction (GO:0031594)	2/38	0.0440183	0.138343	0	0	6.31801	19.7321	DLG2;ANK3
endocytic vesicle membrane (GO:0030666)	4/158	0.0511441	0.147321	0	0	2.9704	8.83132	GRIA1;GRIA2;SYT1;GRIA4
asymmetric, glutamatergic, excitatory synapse (GO:0098985)	1/6	0.051658	0.147321	0	0	22.6503	67.1153	NLGN1
nuclear stress granule (GO:0097165)	1/6	0.051658	0.147321	0	0	22.6503	67.1153	RBFOX1
dystroglycan complex (GO:0016011)	1/6	0.051658	0.147321	0	0	22.6503	67.1153	SGCZ
zonula adherens (GO:0005915)	1/6	0.051658	0.147321	0	0	22.6503	67.1153	SORBS1
integral component of postsynaptic membrane (GO:0099055)	1/7	0.0600059	0.165016	0	0	18.8743	53.0993	NLGN1
integral component of presynaptic membrane (GO:0099056)	1/7	0.0600059	0.165016	0	0	18.8743	53.0993	SLC1A2
cell-cell contact zone (GO:0044291)	2/47	0.06433	0.166908	0	0	5.05211	13.8616	ANK3;SLC8A1
astrocyte projection (GO:0097449)	1/8	0.0682807	0.166908	0	0	16.1771	43.4215	SLC1A2
NMDA selective glutamate receptor complex (GO:0017146)	1/8	0.0682807	0.166908	0	0	16.1771	43.4215	GRIN2B
clathrin-sculpted gamma-aminobutyric acid transport vesicle (GO:0061200)	1/8	0.0682807	0.166908	0	0	16.1771	43.4215	SYT1
clathrin-sculpted gamma-aminobutyric acid transport vesicle membrane (GO:0061202)	1/8	0.0682807	0.166908	0	0	16.1771	43.4215	SYT1
dendritic spine membrane (GO:0032591)	1/8	0.0682807	0.166908	0	0	16.1771	43.4215	GRIA1
spectrin-associated cytoskeleton (GO:0014731)	1/8	0.0682807	0.166908	0	0	16.1771	43.4215	ANK3
intermediate filament (GO:0005882)	2/50	0.0716793	0.172478	0	0	4.73563	12.481	MACF1;DST
junctional sarcoplasmic reticulum membrane (GO:0014701)	1/9	0.0764831	0.181206	0	0	14.1543	36.3862	RYR2
apical dendrite (GO:0097440)	1/10	0.0846137	0.197432	0	0	12.581	31.0707	MAP2
extracellular membrane-bounded organelle (GO:0065010)	2/56	0.0871302	0.200269	0	0	4.20817	10.2694	GPM6A;GRIA4
dendrite cytoplasm (GO:0032839)	1/11	0.0926731	0.201009	0	0	11.3223	26.9321	MAP2
Golgi medial cisterna (GO:0005797)	1/11	0.0926731	0.201009	0	0	11.3223	26.9321	MAN2A1
integral component of postsynaptic density membrane (GO:0099061)	1/11	0.0926731	0.201009	0	0	11.3223	26.9321	LRRC4C
intrinsic component of postsynaptic density membrane (GO:0099146)	1/11	0.0926731	0.201009	0	0	11.3223	26.9321	LRRC4C
extracellular vesicle (GO:1903561)	2/59	0.095196	0.203614	0	0	3.98609	9.37455	GPM6A;GRIA4
transport vesicle membrane (GO:0030658)	2/60	0.0979308	0.206594	0	0	3.91716	9.10151	GRIA1;SYT1
neuron projection cytoplasm (GO:0120111)	1/12	0.100662	0.206693	0	0	10.2925	23.6314	MAP2
filopodium membrane (GO:0031527)	1/12	0.100662	0.206693	0	0	10.2925	23.6314	DMD
beta-catenin-TCF complex (GO:1990907)	1/13	0.108581	0.220019	0	0	9.43429	20.9466	TCF4
axonal growth cone (GO:0044295)	1/14	0.11643	0.232861	0	0	8.70813	18.7265	GPM6A
cytoplasmic vesicle membrane (GO:0030659)	6/380	0.119603	0.23614	0	0	1.83548	3.89779	GRIA1;GRIA2;RYR2;PTPRN2;RYR3;GRIA4
clathrin coat (GO:0030118)	1/15	0.124211	0.239107	0	0	8.08571	16.8649	KCNQ5
integral component of postsynaptic specialization membrane (GO:0099060)	1/15	0.124211	0.239107	0	0	8.08571	16.8649	LRRC4C
dense core granule (GO:0031045)	1/16	0.131924	0.249926	0	0	7.54629	15.2852	SYT1
cell-substrate junction (GO:0030055)	6/394	0.135189	0.249926	0	0	1.76798	3.53788	DST;DLC1;ERBIN;DMD;SORBS1;MAP4K4
vesicle membrane (GO:0012506)	2/73	0.135284	0.249926	0	0	3.19783	6.39686	RYR2;RYR3
platelet alpha granule membrane (GO:0031092)	1/17	0.139569	0.249926	0	0	7.07429	13.9306	PCDH7
protein phosphatase type 2A complex (GO:0000159)	1/17	0.139569	0.249926	0	0	7.07429	13.9306	PPP2R2B
desmosome (GO:0030057)	1/17	0.139569	0.249926	0	0	7.07429	13.9306	KAZN
GABA-A receptor complex (GO:1902711)	1/19	0.154659	0.273765	0	0	6.28762	11.736	GABRG3
spanning component of membrane (GO:0089717)	1/20	0.162105	0.28153	0	0	5.95639	10.8377	NLGN1
plasma membrane raft (GO:0044853)	2/82	0.162703	0.28153	0	0	2.83678	5.15112	KCND2;DLC1
sodium channel complex (GO:0034706)	1/25	0.198369	0.339431	0	0	4.71429	7.62596	GRIK2
secretory vesicle (GO:0099503)	1/29	0.226252	0.382888	0	0	4.04	6.00386	SYT1
endocytic vesicle (GO:0030139)	3/189	0.232267	0.385946	0	0	1.83088	2.67284	GRIA1;GRIA2;GRIA4
exocytic vesicle (GO:0070382)	1/30	0.233071	0.385946	0	0	3.90049	5.68072	SYT1
ion channel complex (GO:0034702)	1/35	0.266279	0.436245	0	0	3.32605	4.40106	GRID2
mitochondrial outer membrane (GO:0005741)	2/126	0.30448	0.493579	0	0	1.8261	2.17151	SLC44A1;PPP2R2B
cortical actin cytoskeleton (GO:0030864)	1/42	0.310382	0.497905	0	0	2.75721	3.2258	DLC1
cornified envelope (GO:0001533)	1/43	0.316464	0.502427	0	0	2.69143	3.09661	KAZN
vesicle (GO:0031982)	3/226	0.320242	0.503238	0	0	1.52422	1.7356	GPM6A;NRXN1;GRIA4
trans-Golgi network (GO:0005802)	3/239	0.351505	0.541846	0	0	1.43931	1.50484	RBFOX1;NBEA;CALN1
endoplasmic reticulum-Golgi intermediate compartment membrane (GO:0033116)	1/49	0.351848	0.541846	0	0	2.35429	2.45918	GRIA1
organelle outer membrane (GO:0031968)	2/142	0.355922	0.542693	0	0	1.61609	1.66949	SLC44A1;PPP2R2B
recycling endosome (GO:0055037)	2/145	0.365431	0.551729	0	0	1.58195	1.59251	GRIA1;MCTP1
Golgi cisterna (GO:0031985)	1/53	0.37442	0.559813	0	0	2.17275	2.13446	MAN2A1
ER to Golgi transport vesicle membrane (GO:0012507)	1/54	0.37994	0.562603	0	0	2.13164	2.06288	GRIA1
coated vesicle membrane (GO:0030662)	1/55	0.385411	0.56527	0	0	2.09206	1.99467	GRIA1
microvillus (GO:0005902)	1/57	0.39621	0.572564	0	0	2.01714	1.86749	WWOX
recycling endosome membrane (GO:0055038)	1/58	0.401539	0.572564	0	0	1.98165	1.80816	GRIA1
SCF ubiquitin ligase complex (GO:0019005)	1/58	0.401539	0.572564	0	0	1.98165	1.80816	FBXL7
caveola (GO:0005901)	1/60	0.412056	0.582171	0	0	1.91429	1.6972	DLC1
ficolin-1-rich granule membrane (GO:0101003)	1/61	0.417245	0.584143	0	0	1.88229	1.64527	PTPRN2
specific granule lumen (GO:0035580)	1/62	0.422389	0.586017	0	0	1.85133	1.59553	LRRC7
collagen-containing extracellular matrix (GO:0062023)	4/380	0.430402	0.591078	0	0	1.20287	1.01406	DST;ATRNL1;ERBIN;TNR
cytoskeleton (GO:0005856)	6/600	0.433974	0.591078	0	0	1.1426	0.95381	MACF1;DTNA;AUTS2;DST;SNTG1;ANK3
cytoplasmic stress granule (GO:0010494)	1/65	0.437552	0.591078	0	0	1.76429	1.45829	RBFOX1
focal adhesion (GO:0005925)	4/387	0.444106	0.594715	0	0	1.18046	0.958171	DST;DLC1;SORBS1;MAP4K4
autophagosome (GO:0005776)	1/69	0.457154	0.601724	0	0	1.66017	1.29947	PIP4K2A
clathrin-coated endocytic vesicle membrane (GO:0030669)	1/69	0.457154	0.601724	0	0	1.66017	1.29947	SYT1
microtubule (GO:0005874)	2/182	0.477322	0.622946	0	0	1.25441	0.927713	MACF1;ZNF804A
COPII-coated ER to Golgi transport vesicle (GO:0030134)	1/79	0.503239	0.651251	0	0	1.44659	0.993361	GRIA1
bounding membrane of organelle (GO:0098588)	7/767	0.515102	0.661047	0	0	1.03899	0.689257	GRIA1;GRIA2;RYR2;PTPRN2;MAN2A1;RYR3;GRIA4
actin cytoskeleton (GO:0015629)	3/316	0.528264	0.667537	0	0	1.08096	0.689826	MACF1;AUTS2;DLC1
clathrin-coated endocytic vesicle (GO:0045334)	1/85	0.529001	0.667537	0	0	1.34286	0.855086	SYT1
lysosomal lumen (GO:0043202)	1/86	0.533163	0.667537	0	0	1.32699	0.834582	GPC5
clathrin-coated vesicle membrane (GO:0030665)	1/90	0.54945	0.676923	0	0	1.26709	0.758783	SYT1
platelet alpha granule (GO:0031091)	1/90	0.54945	0.676923	0	0	1.26709	0.758783	PCDH7
cell projection membrane (GO:0031253)	1/92	0.557381	0.681243	0	0	1.23912	0.724274	DMD
lytic vacuole (GO:0000323)	2/219	0.576504	0.693728	0	0	1.03856	0.572011	PIP4K2A;GRIN2B
early endosome membrane (GO:0031901)	1/97	0.576605	0.693728	0	0	1.17429	0.646559	GRIA1
trans-Golgi network membrane (GO:0032588)	1/99	0.58406	0.696244	0	0	1.1502	0.618524	CALN1
Golgi lumen (GO:0005796)	1/100	0.587739	0.696244	0	0	1.13853	0.605097	GPC5
endoplasmic reticulum membrane (GO:0005789)	6/712	0.600347	0.705751	0	0	0.955741	0.487665	GRIA1;RYR2;MCTP1;TMTC2;GRIN2B;RYR3
polymeric cytoskeletal fiber (GO:0099513)	2/256	0.661329	0.771551	0	0	0.885601	0.366199	MACF1;DST
early endosome (GO:0005769)	2/266	0.681794	0.789446	0	0	0.85162	0.326193	GRIA1;CNTNAP2
secretory granule membrane (GO:0030667)	2/274	0.697434	0.801529	0	0	0.826234	0.297731	PTPRN2;PCDH7
cullin-RING ubiquitin ligase complex (GO:0031461)	1/157	0.751714	0.849468	0	0	0.72044	0.205613	FBXL7
specific granule (GO:0042581)	1/160	0.758263	0.849468	0	0	0.706739	0.195572	LRRC7
vacuolar lumen (GO:0005775)	1/161	0.760407	0.849468	0	0	0.702286	0.192357	GPC5
nucleus (GO:0005634)	36/4484	0.761345	0.849468	0	0	0.8889	0.242375	KHDRBS2;TENM2;KHDRBS3;MAML2;MYT1L;CTNND2;GLIS3;ZBTB20;CACNA1A;AFF3;PDZD2;ERBB4;PDE4B;PHACTR1;FYN;MACROD2;ZNF385D;WWOX;MEF2C;RBFOX1;DST;PDE4D;ERBIN;ZNF804A;MTUS2;SORBS1;OXR1;ST18;QKI;RALYL;FGF14;NFIA;DLC1;TCF4;PLCB1;FGF12
tertiary granule (GO:0070820)	1/164	0.766728	0.849468	0	0	0.689255	0.183082	PTPRN2
microtubule cytoskeleton (GO:0015630)	2/331	0.79129	0.867448	0	0	0.681096	0.159438	MACF1;DST
lysosome (GO:0005764)	3/477	0.794222	0.867448	0	0	0.70791	0.163097	PIP4K2A;GPC5;GRIN2B
ficolin-1-rich granule (GO:0101002)	1/184	0.804829	0.872843	0	0	0.613302	0.133163	PTPRN2
late endosome (GO:0005770)	1/189	0.813345	0.87591	0	0	0.596839	0.123307	GRIN2B
nuclear membrane (GO:0031965)	1/204	0.836737	0.894844	0	0	0.552315	0.0984477	NRXN1
intracellular membrane-bounded organelle (GO:0043231)	40/5192	0.857974	0.911228	0	0	0.837596	0.128304	KHDRBS2;TENM2;KHDRBS3;PHLPP1;MAML2;MYT1L;CTNND2;GLIS3;ZBTB20;CACNA1A;MSI2;AFF3;PDZD2;ERBB4;PDE4B;PHACTR1;FYN;MACROD2;ZNF385D;ANKS1B;WWOX;MEF2C;RBFOX1;DST;PDE4D;ERBIN;ZNF804A;MTUS2;SORBS1;OXR1;ST18;QKI;RALYL;DAB1;FGF14;NFIA;DLC1;TCF4;PLCB1;FGF12
nucleolus (GO:0005730)	4/733	0.890251	0.939032	0	0	0.609149	0.0708149	DOCK4;NRXN1;MACROD2;ADARB2
nuclear lumen (GO:0031981)	4/745	0.897426	0.940161	0	0	0.598908	0.0648164	DOCK4;NRXN1;MACROD2;ADARB2
mitochondrial membrane (GO:0031966)	2/469	0.920655	0.953323	0	0	0.476433	0.0393868	SLC44A1;PPP2R2B
Golgi membrane (GO:0000139)	2/472	0.922371	0.953323	0	0	0.473319	0.0382479	MAN2A1;CALN1
secretory granule lumen (GO:0034774)	1/316	0.94012	0.958144	0	0	0.353905	0.0218529	LRRC7
endosome membrane (GO:0010008)	1/325	0.94477	0.958144	0	0	0.343915	0.019539	GRIA1
intracellular non-membrane-bounded organelle (GO:0043232)	6/1158	0.9457	0.958144	0	0	0.572059	0.0319377	MACF1;DOCK4;SNTG1;NRXN1;MACROD2;ADARB2
mitochondrial matrix (GO:0005759)	1/348	0.955087	0.96133	0	0	0.320741	0.0147389	ERBB4
intracellular organelle lumen (GO:0070013)	2/848	0.995817	0.995817	0	0	0.257846	0.0010808	ERBB4;GPC5

## Sheet: Jensen DISEASES
Term	Overlap	P-value	Adjusted P-value	Old P-value	Old Adjusted P-value	Odds Ratio	Combined Score	Genes
Kidney cancer	103/2584	1.38975e-46	3.65505e-44	0	0	9.86306	1041.44	ATP8A2;MYT1L;DGKB;CTNND2;SLC8A1;RIMS2;TNR;THSD7A;ANKS1B;MEF2C;RBFOX1;DSCAM;MTUS2;FRMD4A;ANK3;GABRG3;KIAA1217;WBSCR17;PARD3;KCNQ3;KCNQ5;ASTN2;GRIA1;GRIA2;MACF1;NTM;PCDH15;GLIS3;CACNA1A;TMTC2;SLC1A3;RASAL2;CACNA1C;PDZD2;MAP2;MAN2A1;LRRC4C;TRPM3;GRIA4;TMEM132D;AUTS2;CNTN5;CADM1;CADM2;GRIN2B;LRP1B;ST18;QKI;PTPRD;SDK1;DLG2;NBEA;GALNTL6;CNTN4;FBXL7;DPP10;ROBO2;RYR2;CNTNAP2;TENM2;DOCK4;KCNC2;GRIK1;GRIK2…
Liver cancer	50/597	6.29864e-35	8.28271e-33	0	0	13.9846	1101.29	ROBO2;RYR2;CNTNAP2;TENM2;DOCK4;MCTP1;MAML2;CTNND2;GRIK1;RYR3;RIMS2;GRM7;TNR;ERC2;DSCAM;DST;ANK3;KIAA1217;NRG3;PARD3;KCNQ3;PLCB1;CNTNAP5;GRIA1;MACF1;NRXN1;PCDH15;NRXN3;CACNA1A;ADCY2;CACNA1C;FSTL5;PDZD2;MAP2;ERBB4;DMD;CSMD3;CSMD1;GRIA4;TMEM132D;CADM2;PCDH7;SLC4A10;OXR1;LRP1B;STXBP5L;SDK1;FAM155A;NBEA;MDGA2
Melanoma	42/505	4.60699e-29	4.0388e-27	0	0	13.1066	855.174	GRIA1;CHRM3;MACF1;CNTNAP2;KHDRBS2;CTNND2;PCDH15;NRXN3;GRIK1;GRIK2;FSTL5;GRM7;ERBB4;TNR;GPC5;DMD;CTNNA3;ZNF385D;CSMD3;LRRC4C;TRPM3;RGS7;RBFOX1;GRID2;CADM2;NEBL;CADPS;ZNF804A;ANK3;GRIN2B;LRP1B;ST18;KIAA1217;PTPRD;SDK1;WBSCR17;NRG3;KCNQ3;KCNQ5;TCF4;ASTN2;PLCB1
Skin cancer	40/454	1.25706e-28	8.26518e-27	0	0	13.7894	885.883	GRIA1;CHRM3;MACF1;CNTNAP2;KHDRBS2;PCDH15;GRIK2;FSTL5;GRM7;ERBB4;TNR;DMD;CTNNA3;ZNF385D;CSMD3;LRRC4C;TRPM3;RGS7;TMEM132D;GRID2;CADM2;NEBL;ATRNL1;CADPS;ZNF804A;ANK3;GRIN2B;LRP1B;ST18;KIAA1217;PTPRD;NRG3;LRRC7;KCNQ3;KCNQ5;TCF4;CNTN4;ASTN2;PLCB1;KCTD16
Carcinoma	160/11318	6.9084e-24	3.63382e-22	0	0	7.76662	414.189	CHRM3;ATP8A2;MAML2;MYT1L;DGKB;FRMPD4;CTNND2;ZBTB20;MSI2;ADARB2;SLC8A1;HS6ST3;RIMS2;GRIP1;TNR;PIP4K2A;THSD7A;MACROD2;RGS6;ANKS1B;RGS7;CALN1;MEF2C;RBFOX1;DSCAM;MTUS2;KAZN;FRMD4A;PRKCA;UNC5D;ANK3;GABRG3;KIAA1217;WBSCR17;PARD3;KCNQ3;KCNQ5;ASTN2;KCTD16;GRIA1;GPM6A;GRIA2;MACF1;KHDRBS2;KHDRBS3;NTM;PCDH15;GLIS3;SLC1A2;CACNA1A;TMTC2;SLC1A3;RASAL2;CACNA1C;NPAS3;DPP6;PDZD2;CDH20;SNTG1;MAP2;MAN2A1;NXPH1;LRRC…
Breast cancer	28/434	1.48155e-16	6.49412e-15	0	0	9.04846	329.801	DPP10;ROBO2;MACF1;RYR2;CNTNAP2;DOCK4;PCDH15;RYR3;RIMS2;PDZD2;GRM7;ERBB4;GPC5;DMD;CSMD3;CSMD1;TMEM132D;DST;PDE4D;CADPS;MTUS2;ANK3;LRP1B;STXBP5L;PTPRD;SDK1;LRRC7;HCN1
Pancreatic cancer	18/137	2.35161e-16	8.83534e-15	0	0	18.8645	678.862	RYR2;TENM2;DSCAM;PCDH9;PCDH15;NRXN3;MTUS2;CACNA1C;LRP1B;RYR3;PTPRD;DPP6;TNR;DMD;THSD7A;CSMD3;MDGA2;CSMD1
Endometrial cancer	23/292	1.306e-15	4.29348e-14	0	0	10.928	374.523	MACF1;RYR2;CNTNAP2;GRID2;DSCAM;KCND2;NRXN1;PCDH15;MTUS2;ANK3;CACNA1C;LRP1B;RYR3;PTPRD;SDK1;DLG2;LRRC7;ERBB4;DMD;CSMD3;CSMD1;TRPM3;CNTNAP5
Mental depression	11/82	1.45871e-10	4.26269e-09	0	0	18.5474	420.067	WBSCR17;NLGN1;GRM7;NEBL;PARD3;KCNIP4;TMTC2;DMD;GRIN2B;FGF12;PTPRG
Lung cancer	20/400	4.10432e-10	1.07944e-08	0	0	6.56005	141.788	GRIA1;MEF2C;ATP8A2;DSCAM;KCNC2;ATRNL1;KCNIP4;PCDH15;GABRG3;LRP1B;PTPRD;GRM7;NRG3;ERBB4;GPC5;DMD;CSMD3;LRRC4C;GRIA4;HCN1
Bipolar disorder	12/124	1.00207e-09	2.39585e-08	0	0	12.878	266.849	DPP10;GPM6A;MCTP1;AUTS2;NFIA;NEBL;DLC1;ANK3;CACNA1C;ZNF385D;CTNNA2;NPAS3
Schizophrenia	12/126	1.20668e-09	2.64465e-08	0	0	12.6508	259.79	ROBO2;WWOX;ZNF804A;TCF4;CTNNA3;ANK3;CACNA1C;CNTNAP5;ANKS1B;CALN1;NPAS3;PTPRG
Type 2 diabetes mellitus	16/269	2.15676e-09	4.36329e-08	0	0	7.73557	154.361	WWOX;SYT1;DGKB;KCNC2;CADPS;GLIS3;ZBTB20;CACNA1C;GABRG3;RIMS2;PTPRD;FAM155A;PDZD2;PDE4B;MACROD2;ZNF385D
Anorexia nervosa	8/47	7.19437e-09	1.35151e-07	0	0	24.1575	452.952	ROBO2;WWOX;FAM155A;MCTP1;ATP8A2;DAB1;PCDH7;MACROD2
Cognitive disorder	8/52	1.65852e-08	2.90793e-07	0	0	21.4069	383.5	CNTNAP2;PTPRN2;KCNC2;PDE4D;NTM;NXPH1;ERC2;MDGA2
Osteoporosis	11/130	2.10353e-08	3.45767e-07	0	0	11.0392	195.141	KIAA1217;CNTNAP2;MEF2C;DLG2;FGF14;CADM1;KCNC2;PHACTR1;CTNNA2;ERC2;PLCB1
Acquired metabolic disease	16/338	5.41551e-08	8.37812e-07	0	0	6.05652	101.334	CNTNAP2;DOCK4;NEGR1;CADM2;KCNC2;CTNND2;PCDH15;GLIS3;NRXN3;GRIK1;ADCY2;LRP1B;HS6ST3;FSTL5;ANKS1B;OPCML
Ovarian cancer	7/51	3.02904e-07	4.42576e-06	0	0	18.6202	279.487	RYR2;MACF1;DST;LRRC7;LUZP2;CSMD3;LRP1B
Motor neuron disease	6/36	6.67068e-07	9.23363e-06	0	0	23.2871	331.151	DPP6;DAB1;MYT1L;NRXN1;THSD7A;NXPH1
Attention deficit hyperactivity disorder	9/119	1.08762e-06	1.43022e-05	0	0	9.65846	132.625	DPP10;GRM5;MYT1L;LRRC7;LUZP2;GRIK1;CNTN4;ZNF385D;ASTN2
DOID:2627	8/92	1.52152e-06	1.90552e-05	0	0	11.1905	149.905	RIMS2;CNTNAP2;RYR2;MACF1;SDK1;CSMD3;RYR3;HCN1
Globe disease	7/68	2.23686e-06	2.67406e-05	0	0	13.4194	174.593	PTPRD;PTPRN2;CNTN5;CADM2;CTNND2;ADCY2;GABRG3
Obesity	8/103	3.58031e-06	4.09401e-05	0	0	9.88922	124.011	WWOX;PCDH9;NEGR1;NRXN1;NRXN3;LHFPL3;MACROD2;RGS6
Acquired immunodeficiency syndrome	7/78	5.66193e-06	5.95635e-05	0	0	11.5235	139.225	GRM5;DAB1;NRG3;NBEA;GPC5;ZNF385D;RYR3
Vascular disease	7/78	5.66193e-06	5.95635e-05	0	0	11.5235	139.225	MEF2C;DAB1;NEBL;NRXN1;TNR;CNTN4;CNTNAP5
Large intestine cancer	8/122	1.25851e-05	0.000127303	0	0	8.23308	92.8938	DST;NRXN1;PCDH15;PIP4K2A;CACNA1C;GRIN2B;CSMD1;LRP1B
Autistic disorder	4/18	1.61041e-05	0.000156866	0	0	32.907	363.176	NTM;GRIK1;CTNNA3;MACROD2
Heart disease	7/94	1.94949e-05	0.000183113	0	0	9.39665	101.91	GRIA1;RYR2;MAML2;PDE4B;PCDH15;PRKCA;NPAS3
Pitt-Hopkins syndrome	4/20	2.51498e-05	0.000228083	0	0	28.7907	304.913	MEF2C;NRXN1;TCF4;ERC2
Retinal disease	4/21	3.08545e-05	0.000270491	0	0	27.0958	281.423	FSTL5;RBFOX1;TCF4;HS6ST3
Refractive error	5/43	3.6601e-05	0.000310518	0	0	15.2247	155.527	MAML2;TNR;KCNQ5;SGCZ;GRIA4
Intellectual disability	11/296	6.53263e-05	0.000536901	0	0	4.57053	44.0421	MEF2C;DPP6;ATP8A2;AUTS2;MYT1L;ZBTB20;FRMD4A;TCF4;ANK3;GRIK2;GRIN2B
Rheumatoid arthritis	11/310	9.8548e-05	0.000785398	0	0	4.3534	40.16	MCTP1;DSCAM;NRG3;NFIA;ERBB4;NRXN1;PCDH15;TNR;CTNNA3;AFF3;MDGA2
Toxic encephalopathy	7/126	0.000127063	0.000982872	0	0	6.85868	61.5281	GRIA1;GRM5;GRM7;MAP2;SLC1A2;SLC1A3;GRIN2B
Epilepsy	3/12	0.00013902	0.00104464	0	0	38.1792	339.065	PTPRD;CHRM3;ZNF385D
Brain ischemia	4/35	0.000245204	0.00179135	0	0	14.8485	123.441	MAP2;SLC1A2;GRIK2;SLC8A1
Alzheimer's disease	8/195	0.000340656	0.00242142	0	0	5.00051	39.9272	CNTNAP2;DAB1;CNTN5;LUZP2;GLIS3;FRMD4A;GRIN2B;PITPNC1
Cerebellar ataxia	5/69	0.000355389	0.00245966	0	0	9.02778	71.7013	CNTNAP2;GRID2;ATP8A2;PPP2R2B;CACNA1A
Lymphoid leukemia	7/152	0.000402019	0.00271105	0	0	5.62142	43.954	RYR2;PARD3;PDE4B;DMD;UNC5D;CSMD3;LRP1B
Amyotrophic lateral sclerosis	4/45	0.00065161	0.00425975	0	0	11.2212	82.3195	DPP6;NRXN3;CNTN4;ANKS1B
Major depressive disorder	5/79	0.000664068	0.00425975	0	0	7.80386	57.1018	GRIA1;GRM5;GRM7;ANK3;CACNA1C
Acrodysostosis	2/5	0.000756706	0.00462823	0	0	75.9425	545.764	PDE4D;PDE4B
Restless legs syndrome	2/5	0.000756706	0.00462823	0	0	75.9425	545.764	PTPRD;RBFOX1
Heart conduction disease	5/82	0.000787119	0.00470482	0	0	7.49867	53.594	FGF14;NFIA;FRMD4A;SLC8A1;PTPRG
Orofacial cleft	4/53	0.00121258	0.00708687	0	0	9.38538	63.0229	WBSCR17;GRM7;CADM1;LRRC7
Chronic obstructive pulmonary disease	6/135	0.00125578	0.00717981	0	0	5.38851	35.9952	PTPRD;WWOX;DLG2;SNTG1;ADCY2;CALN1
Asthma	5/92	0.00132209	0.00739809	0	0	6.63339	43.9697	PCDH9;CTNND2;PDE4D;PCDH15;CSMD1
Chronic fatigue syndrome	3/26	0.00150073	0.00822276	0	0	14.9291	97.0662	MACF1;GRID2;NBEA
Pervasive developmental disorder	2/7	0.00157075	0.00843078	0	0	45.5609	294.15	DMD;CTNNA3
Parkinson's disease	5/99	0.00183042	0.00962803	0	0	6.13724	38.6843	DLG2;ARL15;PARD3;CTNNA3;CSMD1
Alcohol dependence	5/103	0.00217824	0.0112329	0	0	5.88555	36.0739	GRM5;GRM7;SLC1A2;GABRG3;GRIN2B
Fleck corneal dystrophy	2/9	0.0026617	0.013462	0	0	32.5402	192.924	KHDRBS3;PTPRG
obsessive-compulsive disorder	3/33	0.00301041	0.0149384	0	0	11.4416	66.4264	DLGAP1;GRIN2B;RYR3
Disease of mental health	3/34	0.00328058	0.0159776	0	0	11.072	63.3288	SYT1;MTUS2;MDGA2
Dyslexia	3/36	0.00386434	0.0184786	0	0	10.3999	57.7814	CNTNAP2;DOCK4;CNTNAP5
Wernicke encephalopathy	2/11	0.0040197	0.0188782	0	0	25.3065	139.605	SLC1A2;SLC1A3
Huntington's disease	4/76	0.004544	0.0203436	0	0	6.37984	34.4126	GRM5;SLC1A2;GRIK2;GRIN2B
Migraine	2/12	0.00479584	0.0203436	0	0	22.7747	121.617	PHACTR1;ASTN2
Morphine dependence	2/12	0.00479584	0.0203436	0	0	22.7747	121.617	GRIA1;SLC1A2
Trichorhinophalangeal syndrome type II	2/12	0.00479584	0.0203436	0	0	22.7747	121.617	KCNQ3;CSMD3
Ganglioglioma	2/12	0.00479584	0.0203436	0	0	22.7747	121.617	MAP2;QKI
Autism spectrum disorder	2/12	0.00479584	0.0203436	0	0	22.7747	121.617	PCDH9;DLGAP1
Cardiovascular system disease	7/246	0.00621871	0.0259606	0	0	3.3942	17.2432	WWOX;MEF2C;KHDRBS2;DPP6;FMNL2;MACROD2;RYR3
Williams-Beuren syndrome	3/45	0.00724941	0.0290026	0	0	8.16763	40.2406	WBSCR17;AUTS2;CALN1
Immune system cancer	5/137	0.00732604	0.0290026	0	0	4.36204	21.4452	RYR2;DMD;UNC5D;CSMD3;LRP1B
Hypermobility syndrome	2/15	0.00749876	0.0290026	0	0	17.5164	85.7078	PCDH9;KCNQ5
Lambert-Eaton myasthenic syndrome	2/15	0.00749876	0.0290026	0	0	17.5164	85.7078	CNTNAP2;SYT1
Cri-Du-Chat syndrome	2/15	0.00749876	0.0290026	0	0	17.5164	85.7078	SDK1;CTNND2
Encephalitis	3/49	0.00917486	0.0344712	0	0	7.45589	34.9777	CNTNAP2;DPP6;GRIN2B
Dental caries	3/49	0.00917486	0.0344712	0	0	7.45589	34.9777	WWOX;PCDH9;CTNNA3
Organ system cancer	2/17	0.00960139	0.0355657	0	0	15.1793	70.5208	KCNC2;GRIK1
Machado-Joseph disease	2/18	0.0107396	0.0392293	0	0	14.2299	64.5157	FGF14;PPP2R2B
Nicotine dependence	3/53	0.0113718	0.0409695	0	0	6.85803	30.7008	NRXN1;NRXN3;FRMD4A
Pelizaeus-Merzbacher disease	2/19	0.0119342	0.0424148	0	0	13.3922	59.3051	GPM6A;KCTD16
Fuchs' endothelial dystrophy	2/20	0.0131842	0.0456244	0	0	12.6475	54.7477	TCF4;PTPRG
dentatorubral-pallidoluysian atrophy	2/20	0.0131842	0.0456244	0	0	12.6475	54.7477	FGF14;PPP2R2B
Neurodegenerative disease	7/293	0.0152662	0.0521431	0	0	2.8296	11.8337	WWOX;DPP6;GRID2;FGF14;ERBB4;PPP2R2B;CACNA1A
Gastroesophageal reflux disease	2/24	0.0187173	0.0623121	0	0	10.3459	41.159	WWOX;GRM5
Corneal disease	2/24	0.0187173	0.0623121	0	0	10.3459	41.159	TCF4;PTPRG
Essential tremor	2/25	0.0202287	0.0665019	0	0	9.89555	38.5991	SLC1A2;HCN1
Autosomal dominant cerebellar ataxia	2/27	0.0233984	0.0759724	0	0	9.10299	34.1825	PPP2R2B;CACNA1A
Specific language impairment	2/30	0.0285054	0.0903244	0	0	8.12644	28.9111	CNTNAP2;DOCK4
DOID:9917	2/30	0.0285054	0.0903244	0	0	8.12644	28.9111	CSMD1;LRP1B
Fragile X syndrome	2/31	0.030298	0.0948617	0	0	7.84582	27.4343	GRIA1;GRM5
Essential hypertension	3/78	0.0315165	0.0975157	0	0	4.56624	15.7866	WBSCR17;LRRC7;PHACTR1
Cardiomyopathy	3/80	0.0336107	0.102786	0	0	4.44719	15.0889	RYR2;CTNNA3;DMD
Asperger syndrome	2/35	0.0378958	0.113257	0	0	6.89342	22.5616	NRXN1;ERC2
Lipid metabolism disorder	2/35	0.0378958	0.113257	0	0	6.89342	22.5616	FAM155A;TRPM3
Idiopathic scoliosis	2/37	0.0419388	0.122271	0	0	6.49885	20.6114	DSCAM;SNTG1
Endocardial fibroelastosis	1/5	0.0432364	0.122271	0	0	28.3143	88.9372	NEBL
Heavy chain disease	1/5	0.0432364	0.122271	0	0	28.3143	88.9372	PARD3
Intraductal papilloma	1/5	0.0432364	0.122271	0	0	28.3143	88.9372	DOCK4
Leiomyomatosis	1/5	0.0432364	0.122271	0	0	28.3143	88.9372	RGS7
Membranous glomerulonephritis	1/6	0.051658	0.131903	0	0	22.6503	67.1153	THSD7A
Exfoliation syndrome	1/6	0.051658	0.131903	0	0	22.6503	67.1153	CNTNAP2
Trichorhinophalangeal syndrome type I	1/6	0.051658	0.131903	0	0	22.6503	67.1153	PCDH9
Urofacial syndrome	1/6	0.051658	0.131903	0	0	22.6503	67.1153	CHRM3
Autosomal recessive non-syndromic intellectual disability	1/6	0.051658	0.131903	0	0	22.6503	67.1153	GRIK2
Vestibular nystagmus	1/6	0.051658	0.131903	0	0	22.6503	67.1153	DTNA
Hidradenoma	1/6	0.051658	0.131903	0	0	22.6503	67.1153	MAML2
Central core myopathy	1/6	0.051658	0.131903	0	0	22.6503	67.1153	RYR3
Pineoblastoma	1/6	0.051658	0.131903	0	0	22.6503	67.1153	CADPS
Dental pulp necrosis	1/6	0.051658	0.131903	0	0	22.6503	67.1153	LRRC7
Angelman syndrome	2/44	0.0572566	0.138435	0	0	5.41379	15.4846	WBSCR17;GABRG3
Pain agnosia	3/101	0.0597673	0.138435	0	0	3.4905	9.83378	CHRM3;SLC1A2;GRIN2B
Sinoatrial node disease	1/7	0.0600059	0.138435	0	0	18.8743	53.0993	MALAT1
Mutism	1/7	0.0600059	0.138435	0	0	18.8743	53.0993	CNTNAP2
Myocardial infarction	1/7	0.0600059	0.138435	0	0	18.8743	53.0993	PHACTR1
Teratocarcinoma	1/7	0.0600059	0.138435	0	0	18.8743	53.0993	CTNNA2
Toxocariasis	1/7	0.0600059	0.138435	0	0	18.8743	53.0993	SLC44A1
Arrhythmogenic right ventricular cardiomyopathy	1/7	0.0600059	0.138435	0	0	18.8743	53.0993	RYR2
Borna disease	1/7	0.0600059	0.138435	0	0	18.8743	53.0993	TNR
Chromosome Xp21 deletion syndrome	1/7	0.0600059	0.138435	0	0	18.8743	53.0993	DMD
Schizotypal personality disorder	1/7	0.0600059	0.138435	0	0	18.8743	53.0993	ZNF804A
Gilles de la Tourette syndrome	2/48	0.0667501	0.145999	0	0	4.94203	13.3771	CNTNAP2;NRXN1
Small intestine cancer	1/8	0.0682807	0.145999	0	0	16.1771	43.4215	FGF12
Spondylolysis	1/8	0.0682807	0.145999	0	0	16.1771	43.4215	PTPRN2
Usher syndrome	1/8	0.0682807	0.145999	0	0	16.1771	43.4215	PCDH15
Glycerol kinase deficiency	1/8	0.0682807	0.145999	0	0	16.1771	43.4215	DMD
alpha-mannosidosis	1/8	0.0682807	0.145999	0	0	16.1771	43.4215	MAN2A1
High pressure neurological syndrome	1/8	0.0682807	0.145999	0	0	16.1771	43.4215	CACNA1C
multidrug-resistant tuberculosis	1/8	0.0682807	0.145999	0	0	16.1771	43.4215	KAZN
Cyclothymic disorder	1/8	0.0682807	0.145999	0	0	16.1771	43.4215	KCND2
Fetal alcohol syndrome	1/9	0.0764831	0.154731	0	0	14.1543	36.3862	GRIN2B
Asthenopia	1/9	0.0764831	0.154731	0	0	14.1543	36.3862	CADM1
Hypophosphatasia	1/9	0.0764831	0.154731	0	0	14.1543	36.3862	KHDRBS3
Idiopathic generalized epilepsy	1/9	0.0764831	0.154731	0	0	14.1543	36.3862	PCDH7
Kleefstra syndrome	1/9	0.0764831	0.154731	0	0	14.1543	36.3862	DPP6
Larsen syndrome	1/9	0.0764831	0.154731	0	0	14.1543	36.3862	CTNND2
Laryngotracheitis	1/9	0.0764831	0.154731	0	0	14.1543	36.3862	RIMS2
Syndactyly	2/53	0.0792855	0.159176	0	0	4.45639	11.2956	ATRNL1;CACNA1C
Smooth muscle tumor	1/10	0.0846137	0.16484	0	0	12.581	31.0707	LHFPL3
Opiate dependence	1/10	0.0846137	0.16484	0	0	12.581	31.0707	GRIN2B
Benign epilepsy with centrotemporal spikes	1/10	0.0846137	0.16484	0	0	12.581	31.0707	MDGA2
alcohol-related neurodevelopmental disorder	1/10	0.0846137	0.16484	0	0	12.581	31.0707	GRID2
Dementia	3/119	0.0878196	0.165803	0	0	2.94618	7.1665	KIAA1217;MAP2;GRIN2B
Achalasia	1/11	0.0926731	0.165803	0	0	11.3223	26.9321	WWOX
Mowat-Wilson syndrome	1/11	0.0926731	0.165803	0	0	11.3223	26.9321	CNTNAP5
Timothy syndrome	1/11	0.0926731	0.165803	0	0	11.3223	26.9321	CACNA1C
Aortic valve insufficiency	1/11	0.0926731	0.165803	0	0	11.3223	26.9321	PTPRN2
Normal pressure hydrocephalus	1/11	0.0926731	0.165803	0	0	11.3223	26.9321	FRMD4A
Pyelonephritis	1/11	0.0926731	0.165803	0	0	11.3223	26.9321	CHRM3
Croup	1/11	0.0926731	0.165803	0	0	11.3223	26.9321	RIMS2
Leukemia	1/11	0.0926731	0.165803	0	0	11.3223	26.9321	MAML2
Cycloplegia	1/11	0.0926731	0.165803	0	0	11.3223	26.9321	KCND2
Malignant glioma	1/11	0.0926731	0.165803	0	0	11.3223	26.9321	SLC8A1
Short QT syndrome	1/11	0.0926731	0.165803	0	0	11.3223	26.9321	CACNA1C
Ebstein anomaly	1/12	0.100662	0.17191	0	0	10.2925	23.6314	NEBL
Enophthalmos	1/12	0.100662	0.17191	0	0	10.2925	23.6314	CTNND2
Esophageal cancer	1/12	0.100662	0.17191	0	0	10.2925	23.6314	PDE4D
Radioulnar synostosis	1/12	0.100662	0.17191	0	0	10.2925	23.6314	ATRNL1
Rectum cancer	1/12	0.100662	0.17191	0	0	10.2925	23.6314	CTNNA2
Cystic lymphangioma	1/12	0.100662	0.17191	0	0	10.2925	23.6314	DSCAM
Sideroblastic anemia	1/12	0.100662	0.17191	0	0	10.2925	23.6314	ADARB2
Mucoepidermoid carcinoma	1/13	0.108581	0.17848	0	0	9.43429	20.9466	MAML2
Episodic ataxia	1/13	0.108581	0.17848	0	0	9.43429	20.9466	KCNAB1
Theileriasis	1/13	0.108581	0.17848	0	0	9.43429	20.9466	MAP4K4
Fibroma	1/13	0.108581	0.17848	0	0	9.43429	20.9466	MACF1
Benign paroxysmal positional nystagmus	1/13	0.108581	0.17848	0	0	9.43429	20.9466	CACNA1A
Hemiplegia	1/13	0.108581	0.17848	0	0	9.43429	20.9466	CACNA1A
Epidermolysis bullosa	1/14	0.11643	0.180125	0	0	8.70813	18.7265	DST
Stomach cancer	1/14	0.11643	0.180125	0	0	8.70813	18.7265	ZBTB20
Facial paralysis	1/14	0.11643	0.180125	0	0	8.70813	18.7265	CADM1
Gas gangrene	1/14	0.11643	0.180125	0	0	8.70813	18.7265	DMD
Ollier disease	1/14	0.11643	0.180125	0	0	8.70813	18.7265	ANKS1B
Biliary tract cancer	1/14	0.11643	0.180125	0	0	8.70813	18.7265	CNTN4
Bullous pemphigoid	1/14	0.11643	0.180125	0	0	8.70813	18.7265	DST
Interstitial lung disease	1/14	0.11643	0.180125	0	0	8.70813	18.7265	CTNNA3
Kawasaki disease	1/14	0.11643	0.180125	0	0	8.70813	18.7265	DAB1
Dentin sensitivity	1/14	0.11643	0.180125	0	0	8.70813	18.7265	TRPM3
Spinocerebellar ataxia type 1	1/15	0.124211	0.184563	0	0	8.08571	16.8649	PPP2R2B
Myasthenia gravis	1/15	0.124211	0.184563	0	0	8.08571	16.8649	CNTNAP2
Panic disorder	1/15	0.124211	0.184563	0	0	8.08571	16.8649	GRM7
Brugada syndrome	1/15	0.124211	0.184563	0	0	8.08571	16.8649	CACNA1C
Pseudohypoparathyroidism	1/15	0.124211	0.184563	0	0	8.08571	16.8649	PDE4D
Congenital hypothyroidism	1/15	0.124211	0.184563	0	0	8.08571	16.8649	GLIS3
Long QT syndrome	1/15	0.124211	0.184563	0	0	8.08571	16.8649	CACNA1C
Simpson-Golabi-Behmel syndrome	1/16	0.131924	0.187079	0	0	7.54629	15.2852	GPC5
Gastrointestinal system disease	1/16	0.131924	0.187079	0	0	7.54629	15.2852	TCF4
Brain infarction	1/16	0.131924	0.187079	0	0	7.54629	15.2852	DLG2
Cannabis dependence	1/16	0.131924	0.187079	0	0	7.54629	15.2852	CSMD1
Hyperprolactinemia	1/16	0.131924	0.187079	0	0	7.54629	15.2852	CNTN5
Left ventricular noncompaction	1/16	0.131924	0.187079	0	0	7.54629	15.2852	DTNA
Leiomyosarcoma	1/16	0.131924	0.187079	0	0	7.54629	15.2852	KCNIP4
Lice infestation	1/16	0.131924	0.187079	0	0	7.54629	15.2852	TMEM132D
Hemolytic anemia	2/72	0.132307	0.187079	0	0	3.24368	6.56077	MACROD2;CSMD1
Cerebrovascular disease	4/225	0.137433	0.191181	0	0	2.06282	4.09392	MAP2;PDE4D;SLC1A2;GRIN2B
Basal ganglia calcification	1/17	0.139569	0.191181	0	0	7.07429	13.9306	SNTG1
Phenylketonuria	1/17	0.139569	0.191181	0	0	7.07429	13.9306	CACNA1A
Pleomorphic adenoma	1/17	0.139569	0.191181	0	0	7.07429	13.9306	MAML2
Insulinoma	1/17	0.139569	0.191181	0	0	7.07429	13.9306	PTPRN2
Disease of metabolism	1/17	0.139569	0.191181	0	0	7.07429	13.9306	ARL15
Myopia	2/75	0.141285	0.192528	0	0	3.1099	6.08602	CTNND2;KCNQ5
3p- syndrome	1/18	0.147147	0.19571	0	0	6.65782	12.7585	CNTN4
Stuttering	1/18	0.147147	0.19571	0	0	6.65782	12.7585	CNTNAP2
Eye and adnexa disease	1/18	0.147147	0.19571	0	0	6.65782	12.7585	LRP1B
Choanal atresia	1/18	0.147147	0.19571	0	0	6.65782	12.7585	ATP8A2
Brain disease	2/77	0.147341	0.19571	0	0	3.02667	5.79609	FGF14;MAP2
Microcephaly	1/19	0.154659	0.202365	0	0	6.28762	11.736	TCF4
Spinocerebellar ataxia type 2	1/19	0.154659	0.202365	0	0	6.28762	11.736	RBFOX1
Botulism	1/19	0.154659	0.202365	0	0	6.28762	11.736	SYT1
Barrett's esophagus	1/20	0.162105	0.210259	0	0	5.95639	10.8377	WWOX
Systemic lupus erythematosus	2/83	0.165809	0.210259	0	0	2.80162	5.03427	NEGR1;NRXN1
Nephrotic syndrome	1/21	0.169486	0.210259	0	0	5.65829	10.0434	THSD7A
Friedreich ataxia	1/21	0.169486	0.210259	0	0	5.65829	10.0434	PPP2R2B
Barth syndrome	1/21	0.169486	0.210259	0	0	5.65829	10.0434	DTNA
Brain edema	1/21	0.169486	0.210259	0	0	5.65829	10.0434	SLC1A2
Heroin dependence	1/21	0.169486	0.210259	0	0	5.65829	10.0434	AUTS2
Cardiac arrest	1/21	0.169486	0.210259	0	0	5.65829	10.0434	ERC2
Hypertrophy of breast	1/21	0.169486	0.210259	0	0	5.65829	10.0434	MTUS2
Congestive heart failure	1/21	0.169486	0.210259	0	0	5.65829	10.0434	GPM6A
Cornelia de Lange syndrome	1/21	0.169486	0.210259	0	0	5.65829	10.0434	FAM19A2
Chediak-Higashi syndrome	1/22	0.176802	0.217285	0	0	5.38857	9.3369	NBEA
Schnyder corneal dystrophy	1/22	0.176802	0.217285	0	0	5.38857	9.3369	SLC8A1
Meniere's disease	1/23	0.184054	0.225146	0	0	5.14338	8.70529	CACNA1A
Kidney disease	2/91	0.191003	0.231783	0	0	2.54875	4.21938	GRIK2;HCN1
Aniridia	1/24	0.191243	0.231783	0	0	4.9195	8.13789	LUZP2
Astigmatism	1/25	0.198369	0.238224	0	0	4.71429	7.62596	KCND2
Brain cancer	1/25	0.198369	0.238224	0	0	4.71429	7.62596	SLC8A1
Vesicoureteral reflux	1/26	0.205432	0.242281	0	0	4.52549	7.16222	ROBO2
Osteomalacia	1/26	0.205432	0.242281	0	0	4.52549	7.16222	KHDRBS3
Liver disease	1/26	0.205432	0.242281	0	0	4.52549	7.16222	MACROD2
Malaria	1/26	0.205432	0.242281	0	0	4.52549	7.16222	ZNF804A
ENSP00000256078	1/28	0.219373	0.255288	0	0	4.18984	6.35591	LRP1B
Age related macular degeneration	1/28	0.219373	0.255288	0	0	4.18984	6.35591	MAP2
Malignant hyperthermia	1/28	0.219373	0.255288	0	0	4.18984	6.35591	RYR2
Kabuki syndrome	1/29	0.226252	0.262134	0	0	4.04	6.00386	MACROD2
Nephrolithiasis	1/30	0.233071	0.267676	0	0	3.90049	5.68072	CHRM3
Uterine fibroid	1/30	0.233071	0.267676	0	0	3.90049	5.68072	RGS7
Prostate cancer	2/105	0.2361	0.269976	0	0	2.20076	3.17679	CTNND2;TMTC2
Disease of anatomical entity	1/31	0.23983	0.273053	0	0	3.77029	5.38331	SGCZ
Chagas disease	1/32	0.24653	0.278272	0	0	3.64848	5.10886	NTM
Dilated cardiomyopathy	1/32	0.24653	0.278272	0	0	3.64848	5.10886	DMD
Retinal degeneration	1/34	0.259754	0.291946	0	0	3.42701	4.61968	PITPNC1
Psoriasis	1/35	0.266279	0.298006	0	0	3.32605	4.40106	RGS6
Ulcerative colitis	2/115	0.268674	0.299413	0	0	2.00498	2.63506	NRG3;GPC5
Cancer	4/300	0.271757	0.301397	0	0	1.53426	1.9989	WWOX;DOCK4;PRKCA;FYN
Muscular dystrophy	1/36	0.272747	0.301397	0	0	3.23086	4.19756	DTNA
Acute cystitis	1/37	0.279159	0.307191	0	0	3.14095	4.00778	CHRM3
Night blindness	1/39	0.291813	0.319779	0	0	2.97534	3.66455	RGS7
Multiple sclerosis	3/219	0.303413	0.33111	0	0	1.57418	1.87746	PCDH7;GPC5;CTNNA3
Meningitis	1/44	0.322492	0.350477	0	0	2.6287	2.97485	CADM1
Peripheral vascular disease	1/47	0.340261	0.368266	0	0	2.45689	2.64864	CACNA1C
Brachydactyly	1/50	0.357566	0.385409	0	0	2.30612	2.3717	PDE4D
Metabolic acidosis	1/51	0.363234	0.38992	0	0	2.25989	2.28861	SLC4A10
Crohn's disease	3/248	0.373068	0.398849	0	0	1.3858	1.36639	MAML2;PCDH9;ADARB2
Alopecia areata	1/56	0.390834	0.416152	0	0	2.05392	1.9296	RASAL2
Prader-Willi syndrome	1/58	0.401539	0.425825	0	0	1.98165	1.80816	GABRG3
Tetanus	1/60	0.412056	0.435224	0	0	1.91429	1.6972	GRIA1
Congenital heart disease	1/62	0.422389	0.444353	0	0	1.85133	1.59553	MEF2C
Vitiligo	1/63	0.427488	0.447926	0	0	1.82138	1.54786	SLC1A2
Gout	1/69	0.457154	0.477109	0	0	1.66017	1.29947	TENM2
Neutropenia	1/72	0.471409	0.490042	0	0	1.58978	1.19556	WWOX
Diabetes mellitus	1/74	0.480705	0.497738	0	0	1.54607	1.1325	PTPRN2
Blindness	1/81	0.511978	0.52804	0	0	1.41029	0.944148	PCDH15
Retinitis pigmentosa	1/83	0.520565	0.534799	0	0	1.37575	0.898146	PCDH15
Nonsyndromic deafness	1/87	0.537289	0.54974	0	0	1.3115	0.814726	PCDH15
Coronary artery disease	2/205	0.540629	0.54974	0	0	1.11098	0.683276	RYR2;PHACTR1
Celiac disease	1/88	0.541379	0.54974	0	0	1.29635	0.795491	NFIA
Down syndrome	1/89	0.545432	0.551726	0	0	1.28156	0.776851	DSCAM
Sensorineural hearing loss	1/103	0.598581	0.603168	0	0	1.10487	0.567014	PCDH15
Type 1 diabetes mellitus	1/158	0.753917	0.756794	0	0	0.715814	0.202199	GLIS3
Hypertension	1/289	0.923701	0.923701	0	0	0.387619	0.0307643	SLC8A1

## Sheet: Disease Perturbations from GEO down
Term	Overlap	P-value	Adjusted P-value	Old P-value	Old Adjusted P-value	Odds Ratio	Combined Score	Genes
schizophrenia DOID-5419 human GSE25673 sample 892	18/337	1.25219e-09	4.38712e-07	0	0	6.92163	141.882	ROBO2;KHDRBS3;KCND2;LUZP2;PRKCA;GRIK1;LHFPL3;GRIP1;FMNL2;KCNQ3;TNR;DLGAP1;CTNNA3;CNTN4;MDGA2;CSMD1;CNTNAP5;RNF220
Breast Cancer C0006142 human GSE1378 sample 52	17/299	1.4384e-09	4.38712e-07	0	0	7.36252	149.899	ROBO2;GRIA2;TENM2;ATP8A2;DTNA;KCND2;MYT1L;CTNND2;GLIS3;NRXN3;ADCY2;AFF3;HS6ST3;AGBL4;FAM155A;MAP2;LRRC4C
Alzheimer's disease DOID-10652 human GSE4757 sample 592	18/369	5.23021e-09	1.06348e-06	0	0	6.28028	119.757	GPM6A;GRIA2;MACF1;MEF2C;RBFOX1;SYT1;PCDH9;SLC1A2;CACNA1A;SLC1A3;ADCY2;HS6ST3;WBSCR17;FMNL2;MALAT1;TCF4;LRRC4C;ANKS1B
Bipolar Disorder C0005586 human GSE5389 sample 302	18/395	1.50268e-08	2.29159e-06	0	0	5.83935	105.187	CHRM3;GPM6A;GRIA2;MEF2C;RBFOX1;DOCK4;SYT1;PCDH9;CTNND2;NRXN1;ANK3;OXR1;PTPRD;PDZD2;NBEA;TCF4;CTNNA2;PLCB1
schizophrenia DOID-5419 human GSE25673 sample 891	15/274	2.30162e-08	2.80797e-06	0	0	6.99414	123.006	GRID2;DTNA;KCND2;CADM2;PRKCA;GRIK1;LHFPL3;GRIK2;LRP1B;DPP6;CDH20;SNTG1;GPC5;NXPH1;CSMD1
Alzheimer's disease DOID-10652 human GSE36980 sample 520	16/325	3.40769e-08	3.46449e-06	0	0	6.27599	107.913	ROBO2;RBFOX1;ATRNL1;NRXN3;GABRG3;GRIN2B;OXR1;HS6ST3;WBSCR17;RALYL;KCNQ5;PHACTR1;PLCB1;RGS7;OPCML;HCN1
glaucoma associated with systemic syndromes DOID-1686 mouse GSE26299 sample 488	15/328	2.41364e-07	2.10332e-05	0	0	5.77151	87.9402	GRIA1;RBFOX1;KCND2;MYT1L;KCNC2;KCNIP4;ADCY2;RALYL;LRRTM4;FAM19A2;GALNTL6;CTNNA2;FGF12;CALN1;OPCML
prostate cancer DOID-10283 human GSE26910 sample 603	13/290	1.96665e-06	0.000149957	0	0	5.59342	73.493	GPM6A;RYR2;RBFOX1;SYT1;ATRNL1;CADPS;GLIS3;LSAMP;ZNF804A;LRP1B;MAP2;THSD7A;CSMD3
astrocytoma DOID-3069 human GSE15824 sample 860	13/301	2.96325e-06	0.000200843	0	0	5.37676	68.4419	SYT1;SLC44A1;PCDH9;ANK3;NEAT1;ST18;PTPRD;FMNL2;MAN2A1;PIP4K2A;CTNNA3;ANKS1B;MAP4K4
Huntington's disease DOID-12858 mouse GSE3621 sample 704	14/356	3.63799e-06	0.000221917	0	0	4.89244	61.2733	GRIA2;MEF2C;RBFOX1;KHDRBS3;SYT1;KCNIP4;SLC1A2;SLC1A3;KCNAB1;NEAT1;MAP2;ERC2;FGF12;CALN1
oligodendroglioma DOID-3181 human GSE15824 sample 859	13/310	4.08854e-06	0.000226728	0	0	5.21142	64.6598	SYT1;SLC44A1;PCDH9;ANK3;NEAT1;ST18;PTPRD;FMNL2;MAN2A1;PIP4K2A;CTNNA3;ANKS1B;MAP4K4
oligodendroglioma DOID-3181 human GSE15824 sample 858	13/313	4.53998e-06	0.000230782	0	0	5.15852	63.4631	SLC44A1;PCDH9;ANK3;NEAT1;ST18;PTPRD;FMNL2;MAN2A1;PIP4K2A;CTNNA3;ANKS1B;RNF220;MAP4K4
astrocytoma DOID-3069 human GSE15824 sample 861	12/299	1.50308e-05	0.000705291	0	0	4.95052	54.9776	PTPRD;FMNL2;SLC44A1;PCDH9;MAN2A1;PIP4K2A;CTNNA3;ANK3;ST18;QKI;ANKS1B;MAP4K4
glioblastoma UMLS CUI-C0017636 human GSE15824 sample 863	12/316	2.59491e-05	0.00113064	0	0	4.66962	49.3082	PTPRD;FMNL2;SLC44A1;PCDH9;MAN2A1;PIP4K2A;CTNNA3;ANK3;ST18;ANKS1B;RNF220;MAP4K4
asthma DOID-2841 human GSE43696 sample 830	12/333	4.32146e-05	0.00175739	0	0	4.41847	44.4026	ERICH1-AS1;FAM155A;MEF2C;ATP8A2;SYT1;CADM2;MTUS2;THSD7A;CNTN4;LRRC4C;RYR3;HS6ST3
Lewy body dementia DOID-12217 human GSE49036 sample 1068	10/234	4.63491e-05	0.00176706	0	0	5.23925	52.2841	GRIA1;ROBO2;RALYL;SYT1;FAM19A2;SLC1A2;CNTN4;XKR4;ERC2;CALN1
epidermolysis bullosa simplex DOID-4644 human GSE28315 sample 711	12/356	8.18876e-05	0.00293832	0	0	4.11818	38.7528	GRIA2;DTNA;NBEA;KCND2;CADM2;NTM;MIR99AHG;FAM19A2;GRIK1;CNTN4;SORBS1;FBXL7
schizophrenia DOID-5419 human GSE12679 sample 543	11/305	8.97669e-05	0.0030421	0	0	4.40167	41.016	DPP10;GRM5;SYT1;PCDH9;FRMPD4;MALAT1;XKR4;ERC2;PLCB1;LRP1B;OPCML
Dystonia C0393593 human GSE3064 sample 329	11/317	0.000126154	0.0040502	0	0	4.22645	37.9451	CHRM3;GRIA2;MEF2C;RBFOX1;DPP6;PTPRN2;SYT1;DLC1;SLC1A2;SLC1A3;KCNAB1
autism spectrum disorder DOID-0060041 human GSE28521 sample 1041	10/283	0.000221577	0.00675809	0	0	4.28813	36.0835	RYR2;RBFOX1;FRMPD4;CADPS;SLC1A2;SLC1A3;KCNAB1;ZNF385D;ADARB2;RGS7
Senescence C0001792 human GSE1572 sample 408	10/314	0.000503748	0.0139676	0	0	3.84474	29.1948	CHRM3;GPM6A;GRIA2;MACF1;CNTNAP2;MEF2C;SYT1;NRXN1;PLCB1;RGS7
Asthma DOID-2841 human GSE43696 sample 635	10/314	0.000503748	0.0139676	0	0	3.84474	29.1948	ROBO2;ERICH1-AS1;FAM155A;KHDRBS2;GRM5;SYT1;CADM2;MTUS2;THSD7A;LRRC4C
Generalized seizures C0234533 rat GSE1156 sample 342	10/318	0.000555743	0.0147393	0	0	3.79404	28.4371	GRIA1;GRIA2;DPP6;SYT1;CADM1;MAP2;PPP2R2B;NRXN1;KCNAB1;FYN
asthma DOID-2841 human GSE43696 sample 829	10/324	0.000642022	0.0163181	0	0	3.72039	27.3482	ERICH1-AS1;AGBL4;FAM155A;GRM5;SYT1;CADM2;MTUS2;THSD7A;LRRC4C;RYR3
schizophrenia DOID-5419 human GSE12679 sample 768	8/216	0.000695787	0.0167222	0	0	4.46404	32.4557	DPP10;GRM5;SYT1;ATRNL1;MALAT1;ERC2;PLCB1;OPCML
atherosclerosis DOID-1936 human GSE43292 sample 508	9/271	0.000712751	0.0167222	0	0	3.99966	28.983	RYR2;NLGN1;PCDH9;NEGR1;ATRNL1;PDE4D;MTUS2;CNTN4;KCTD16
glioblastoma UMLS CUI-C0017636 human GSE15824 sample 862	9/285	0.00101657	0.022967	0	0	3.79406	26.1461	FMNL2;SLC44A1;PCDH9;CTNNA3;ANK3;ST18;ANKS1B;RNF220;MAP4K4
Huntington's disease DOID-12858 mouse GSE3621 sample 702	9/289	0.00112041	0.024409	0	0	3.73909	25.4036	MEF2C;RBFOX1;SYT1;MAP2;KCNC2;SLC1A2;KCNAB1;ERC2;CALN1
severe asthma 2841 human GSE43696 sample 467	10/353	0.00123009	0.0258744	0	0	3.40078	22.7875	ERICH1-AS1;FAM155A;MEF2C;ATP8A2;SYT1;CADM2;MTUS2;THSD7A;LRRC4C;RYR3
amyotrophic lateral sclerosis DOID-332 rat GSE7493 sample 682	9/308	0.00173738	0.0353266	0	0	3.49809	22.2317	GPM6A;GRIA2;FSTL5;RBFOX1;PCDH9;MAP2;NTM;CADPS;TCF4
Small cell carcinoma of lung C0149925 human GSE1037 sample 362	10/373	0.00184883	0.0363803	0	0	3.21011	20.2019	GRIA1;GPM6A;MEF2C;PDZD2;MAML2;NEGR1;NFIA;DLC1;TCF4;SORBS1
pulmonary sarcoidosis DOID-13406 human GSE19976 sample 764	8/261	0.00231613	0.0441513	0	0	3.66162	22.2182	CHRM3;GPM6A;KHDRBS2;NBEA;DST;NEGR1;DMD;SORBS1
Lewy body dementia DOID-12217 human GSE49036 sample 1069	8/277	0.00333244	0.0615997	0	0	3.44102	19.6277	GRIA1;ROBO2;CNTNAP2;RALYL;ATP8A2;CNTN4;XKR4;CALN1
Huntington's disease DOID-12858 mouse GSE3621 sample 703	9/371	0.00591423	0.106108	0	0	2.87998	14.7754	GRIA2;MEF2C;RBFOX1;SYT1;MAP2;KCNC2;SLC1A2;KCNAB1;ERC2
Oligodendroglioma C0028945 human GSE2223 sample 116	8/311	0.00661924	0.115364	0	0	3.04958	15.3021	RBFOX1;MCTP1;MAN2A1;PIP4K2A;TMTC2;ANK3;RNF220;HCN1
bipolar disorder DOID-3312 human GSE5392 sample 573	9/388	0.00783383	0.13274	0	0	2.7484	13.3278	GPM6A;GRIA2;MCTP1;CADM1;NBEA;MYT1L;CTNND2;ERC2;ST18
Papillary Carcinoma of the Thyroid C0238463 human GSE3467 sample 397	6/200	0.00888093	0.146415	0	0	3.55019	16.7706	GPM6A;RYR2;DPP6;GLIS3;KCNAB1;LRP1B
breast adenocarcinoma DOID-3458 human GSE61304 sample 1071	8/334	0.00995076	0.15564	0	0	2.83109	13.0516	FSTL5;TENM2;NLGN1;NRG3;CCSER1;XKR4;RYR3;GRIA4
Bipolar Disorder 3312 human GSE12654 sample 461	8/334	0.00995076	0.15564	0	0	2.83109	13.0516	GPM6A;GRIA2;DPP6;DOCK4;SYT1;CADPS;QKI;RGS7
glaucoma associated with systemic syndromes DOID-1686 mouse GSE26299 sample 491	8/341	0.0111769	0.170448	0	0	2.77058	12.4507	KCND2;KCNIP4;FAM19A2;GPC5;GALNTL6;FGF12;CALN1;OPCML
Wolfram syndrome UMLS CUI-C0043207 mouse GSE15293 sample 695	8/350	0.0129135	0.192127	0	0	2.69643	11.7281	ROBO2;MCTP1;KCND2;MALAT1;KCNQ5;PHACTR1;KCNAB1;LRP1B
Parkinson's disease DOID-14330 human GSE19587 sample 496	8/361	0.0152956	0.222151	0	0	2.61093	10.9142	GPM6A;MACF1;AUTS2;PCDH9;CTNND2;ZBTB20;SLC1A3;RYR3
Huntington's disease DOID-12858 mouse GSE3583 sample 929	7/293	0.0157027	0.22276	0	0	2.81281	11.6842	KHDRBS3;CADM1;MAP2;PCDH7;ZBTB20;TCF4;KCNAB1
Breast Cancer C0006142 human GSE1379 sample 392	7/302	0.0182217	0.251024	0	0	2.72574	10.917	GRIA2;FAM155A;ATP8A2;DTNA;MYT1L;CTNND2;AFF3
dilated cardiomyopathy DOID-12930 human GSE42955 sample 678	7/303	0.0185182	0.251024	0	0	2.7164	10.8357	WBSCR17;NLGN1;CADM2;ATRNL1;CTNND2;LSAMP;PHACTR1
obesity DOID-9970 mouse GSE55389 sample 612	5/174	0.0194406	0.257799	0	0	3.38069	13.3213	GRIA1;DGKB;PIP4K2A;MALAT1;RGS7
Breast Cancer DOID-1612 human GSE34925 sample 478	8/382	0.0207053	0.263208	0	0	2.46167	9.54477	MEF2C;SYT1;NEGR1;MAP2;ZNF804A;PHACTR1;ANK3;SORBS1
Anxiety Disorder C0003469 rat GSE932 sample 111	6/242	0.0209281	0.263208	0	0	2.91213	11.2602	GRIA1;GRIA2;PPP2R2B;CADPS;SLC1A3;TCF4
idiopathic pulmonary fibrosis DOID-0050156 human GSE44723 sample 850	7/312	0.0213403	0.263208	0	0	2.63502	10.1374	ROBO2;FAM155A;DOCK4;MCTP1;PDE4D;PDE4B;DMD
Alexander Disease C0270726 mouse GSE977 sample 87	7/314	0.0220059	0.263208	0	0	2.61759	9.98988	GRIA1;MEF2C;SYT1;KCND2;PPP2R2B;CADPS;ADCY2
Senescence C0001792 rat GSE854 sample 161	7/314	0.0220059	0.263208	0	0	2.61759	9.98988	GRIA1;PPP2R2B;CADPS;NRXN3;LSAMP;ADCY2;OPCML
Alzheimer's disease DOID-10652 human GSE36980 sample 521	5/181	0.0226049	0.265173	0	0	3.24508	12.2975	TENM2;CNTN5;LUZP2;TNR;NXPH1
precursor B lymphoblastic lymphoma/leukemia DOID-7061 human GSE29639 sample 803	5/184	0.0240575	0.276888	0	0	3.1902	11.8909	PTPRD;KHDRBS3;ATRNL1;PDE4B;CALN1
autism spectrum disorder DOID-0060041 human GSE62632 sample 1037	9/472	0.0249516	0.281861	0	0	2.24005	8.26761	DTNA;NBEA;DST;LUZP2;LSAMP;SLC1A3;MALAT1;THSD7A;OXR1
autism spectrum disorder DOID-0060041 human GSE28521 sample 1040	6/259	0.0279908	0.310443	0	0	2.7141	9.70529	NBEA;CADPS;KCNAB1;ADARB2;OXR1;RGS7
autism spectrum disorder DOID-0060041 human GSE28521 sample 1039	6/264	0.0303347	0.330431	0	0	2.66082	9.3008	NBEA;DST;FRMPD4;KCNAB1;GPC5;RYR3
glaucoma associated with systemic syndromes DOID-1686 mouse GSE26299 sample 490	6/268	0.0322999	0.339976	0	0	2.61966	8.99248	CNTN5;KCND2;KCNIP4;GALNTL6;FGF12;CALN1
hepatocellular carcinoma DOID-684 human GSE49515 sample 554	6/269	0.0328039	0.339976	0	0	2.60957	8.91743	CNTNAP2;DOCK4;PCDH9;PDE4B;PHACTR1;MACROD2
peripartum cardiomyopathy DOID-9997 human GSE42955 sample 817	7/342	0.0328829	0.339976	0	0	2.39536	8.17969	NLGN1;MCTP1;CADM2;ATRNL1;CTNND2;MTUS2;PHACTR1
schizophrenia DOID-5419 human GSE21935 sample 855	7/350	0.0365516	0.371608	0	0	2.33854	7.73828	DPP6;FMNL2;SLC44A1;PCDH9;SLC1A2;PIP4K2A;QKI
pancreatic cancer DOID-1793 human GSE23952 sample 798	6/286	0.0421623	0.421623	0	0	2.449	7.75409	SDK1;FSTL5;PCDH9;CADM2;THSD7A;SORBS1
ALS (Amyotrophic Lateral Sclerosis) C0002736 mouse GSE4390 sample 389	7/368	0.04577	0.439936	0	0	2.21988	6.84639	MACF1;DPP6;SYT1;MAP2;PPP2R2B;CADPS;ANK3
bipolar disorder DOID-3312 human GSE12679 sample 770	5/220	0.0462541	0.439936	0	0	2.65116	8.14863	TMEM132D;SYT1;MALAT1;PLCB1;OPCML
Crohn's disease DOID-8778 human GSE6731 sample 757	7/370	0.0468785	0.439936	0	0	2.20742	6.75515	AUTS2;DLC1;ZBTB20;DMD;ANK3;NEAT1;QKI
ulcerative colitis DOID-8577 human GSE1710 sample 993	7/370	0.0468785	0.439936	0	0	2.20742	6.75515	KIAA1217;CNTNAP2;PIP4K2A;FYN;LHFPL3;RYR3;GRIA4
lung large cell carcinoma DOID-4556 human GSE51852 sample 732	7/374	0.0491468	0.454235	0	0	2.18291	6.577	GRIA1;GPM6A;KHDRBS2;FGF14;LUZP2;GPC5;KCTD16
autism spectrum disorder DOID-0060041 human GSE62632 sample 1036	6/301	0.0516912	0.470621	0	0	2.32269	6.88089	MAML2;PARD3;GLIS3;LSAMP;PRKCA;PITPNC1
Schizophrenia C0036341 human GSE4036 sample 357	6/309	0.057271	0.513755	0	0	2.26044	6.46476	GRIA1;SYT1;NBEA;SLC1A3;NEAT1;OPCML
dermatomyositis DOID-10223 human GSE48280 sample 705	4/171	0.0656745	0.575069	0	0	2.7214	7.4105	LRRTM4;ATRNL1;PLCB1;HCN1
Asthma DOID-2841 human GSE43696 sample 634	6/321	0.0662962	0.575069	0	0	2.17299	5.89667	GRIA1;GRIP1;AGBL4;MEF2C;NEAT1;RYR3
Dehydration C0011175 rat GSE4130 sample 210	6/322	0.0670838	0.575069	0	0	2.166	5.85213	GPM6A;FSTL5;NEGR1;MAP2;CTNND2;PHACTR1
idiopathic pulmonary fibrosis DOID-0050156 human GSE24206 sample 871	6/323	0.067877	0.575069	0	0	2.15906	5.80799	GRIA1;MAP2;PDE4D;PDE4B;AFF3;PTPRG
Androgen insensitivity syndrome C0039585 human GSE3871 sample 415	6/327	0.0711042	0.587243	0	0	2.13172	5.63542	KIAA1217;GRIA1;NLGN1;FGF14;AUTS2;PDE4B
Cerebral Infarction C0007785 mouse GSE63 sample 262	7/408	0.0712393	0.587243	0	0	1.99434	5.26846	GRIA1;GRIA2;MACF1;SYT1;CADM1;ANK3;RNF220
melanoma DOID-1909 human GSE6887 sample 948	6/337	0.079554	0.639201	0	0	2.06625	5.23035	GPM6A;SDK1;KHDRBS2;KCNQ5;ADCY2;CNTN4
Parkinson's disease DOID-14330 human GSE7621 sample 941	5/258	0.0796381	0.639201	0	0	2.2486	5.68954	SYT1;PIP4K2A;TMTC2;MALAT1;NEAT1
Bipolar Disorder C0005586 human GSE5388 sample 107	6/341	0.0830859	0.658213	0	0	2.04116	5.07817	GRIA2;DOCK4;KHDRBS3;MCTP1;SYT1;NBEA
Oligodendroglioma C0028945 human GSE4290 sample 251	6/343	0.0848843	0.663838	0	0	2.02884	5.00407	PCDH9;PIP4K2A;ERC2;RYR3;ANKS1B;MAP4K4
idiopathic pulmonary fibrosis DOID-0050156 human GSE24206 sample 872	5/267	0.0890371	0.687502	0	0	2.17036	5.24945	GRIA1;GPM6A;PDE4B;THSD7A;PTPRG
Pauciarticular juvenile arthritis C0157917 human GSE1402 sample 430	5/270	0.0922935	0.703738	0	0	2.14546	5.11216	GRIA2;RYR2;TNR;TCF4;RASAL2
bipolar disorder DOID-3312 human GSE12679 sample 544	5/276	0.0989881	0.745466	0	0	2.09731	4.85057	SYT1;FAM19A2;ERC2;PLCB1;OPCML
cystic fibrosis DOID-1485 mouse GSE3100 sample 1055	5/281	0.10475	0.769846	0	0	2.05879	4.64501	TMTC2;MALAT1;PHACTR1;CACNA1C;NEAT1
Schizophrenia DOID-1574 human GSE12679 sample 451	5/281	0.10475	0.769846	0	0	2.05879	4.64501	TENM2;MAML2;FRMPD4;PLCB1;OPCML
Parkinson's disease DOID-14330 human GSE7621 sample 940	6/365	0.106071	0.770275	0	0	1.90236	4.26823	RALYL;SYT1;MAP2;CADPS;SLC1A2;ERC2
Niemann-Pick disease Type C DOID-14504 mouse GSE39621 sample 469	5/290	0.115529	0.818648	0	0	1.99286	4.30106	PHLPP1;KCNC2;PIP4K2A;PHACTR1;KCNAB1
multiple sclerosis DOID-2377 human GSE38010 sample 737	5/290	0.115529	0.818648	0	0	1.99286	4.30106	PHLPP1;SLC44A1;PIP4K2A;NEAT1;MAP4K4
multiple sclerosis DOID-2377 human GSE38010 sample 738	5/291	0.116758	0.818648	0	0	1.98579	4.26479	PHLPP1;SLC44A1;PIP4K2A;NEAT1;MAP4K4
anemia DOID-2355 human GSE4619 sample 793	5/294	0.120484	0.835172	0	0	1.96487	4.15815	MEF2C;PCDH9;FAM19A2;PDE4B;TCF4
Gastrointestinal stromal tumor C0238198 human GSE15966 sample 76	4/220	0.131582	0.894607	0	0	2.0988	4.25663	PDZD2;NTM;UNC5D;CSMD3
Leukemia DOID-1240 mouse GSE44025 sample 482	5/303	0.131991	0.894607	0	0	1.90466	3.85697	NEBL;CTNND2;GRIK1;FYN;NEAT1
Neurofibromatosis DOID-8712 mouse GSE1482 sample 669	5/305	0.134614	0.902358	0	0	1.89176	3.79364	GRIA2;PPP2R2B;CTNND2;TCF4;FYN
Waldenstrom Macroglobulinemia UMLS CUI-C0024419 human GSE6691 sample 784	5/307	0.13726	0.906242	0	0	1.87904	3.73155	MACF1;MEF2C;AUTS2;PCDH9;FYN
myelodysplastic syndrome DOID-0050908 human GSE19429 sample 812	5/309	0.13993	0.906242	0	0	1.86649	3.67067	MEF2C;PDE4B;MALAT1;TCF4;NEAT1
Cardiomyopathy C0878544 human GSE5406 sample 88	5/309	0.13993	0.906242	0	0	1.86649	3.67067	RBFOX1;PDZD2;LSAMP;MTUS2;SLC1A3
polycystic ovary syndrome 11612 human GSE48301 sample 468	6/397	0.141285	0.906242	0	0	1.7438	3.41257	RYR2;NLGN1;MAP2;CNTN4;SORBS1;SLC8A1
anemia DOID-2355 human GSE4619 sample 792	5/311	0.142622	0.906242	0	0	1.8541	3.61097	MEF2C;PDE4B;MALAT1;TCF4;NEAT1
schizophrenia 5419 human GSE12654 sample 465	5/316	0.14945	0.93792	0	0	1.82382	3.46671	GPM6A;GRIA2;DPP6;PHLPP1;SYT1
myelodysplastic syndrome DOID-0050908 human GSE19429 sample 750	5/317	0.150832	0.93792	0	0	1.81789	3.43869	MEF2C;PDE4B;MALAT1;TCF4;NEAT1
systemic lupus erythematosus DOID-9074 human GSE55447 sample 1073	5/318	0.15222	0.93792	0	0	1.81198	3.41093	CADM1;GPC5;CTNNA2;GRIN2B;OXR1
Schizophrenia C0036341 human GSE12654 sample 226	5/324	0.160658	0.976016	0	0	1.77736	3.24986	GPM6A;GRIA2;DPP6;PHLPP1;NRXN1
autism spectrum disorder DOID-0060041 human GSE63524 sample 1035	5/325	0.162082	0.976016	0	0	1.77171	3.2239	NTM;NRXN3;SORBS1;SLC8A1;RGS7
schizophrenia DOID-5419 human GSE12679 sample 769	6/415	0.163203	0.976016	0	0	1.66551	3.01917	GRIA2;SYT1;PCDH9;ASTN2;ERC2;LRP1B
CML - Chronic myeloid leukemia C0023473 human GSE4170 sample 4	3/159	0.167004	0.982797	0	0	2.17363	3.89022	GRIP1;ATP8A2;PTPRG
Acute Lung Injury C0242488 human GSE10474 sample 168	5/330	0.169282	0.982797	0	0	1.74401	3.09769	DOCK4;PDE4B;SLC1A3;FYN;NEAT1
Neurofibromatosis DOID-8712 mouse GSE1482 sample 665	5/335	0.176606	0.982797	0	0	1.71714	2.97724	GRIA2;MACF1;RYR2;CADPS;RGS7
Parkinson's disease DOID-14330 human GSE19587 sample 1080	3/167	0.184498	0.982797	0	0	2.06676	3.49306	PIP4K2A;SLC1A3;RYR3
Type 2 diabetes mellitus C0011860 human GSE12643 sample 274	4/254	0.188494	0.982797	0	0	1.81022	3.02069	KHDRBS3;DLC1;ZBTB20;DMD
type 2 diabetes mellitus DOID-9352 human GSE23343 sample 893	5/344	0.190085	0.982797	0	0	1.67078	2.77397	FSTL5;CNTN5;CDH20;FAM19A2;CCSER1
psoriasis DOID-8893 human GSE61281 sample 697	4/255	0.190277	0.982797	0	0	1.80292	2.99153	CADM2;XKR4;GRIN2B;LRP1B
Alzheimer's disease DOID-10652 human GSE36980 sample 523	4/259	0.197461	0.982797	0	0	1.77427	2.87825	GRID2;LUZP2;GRIK1;NXPH1
low-grade serous ovarian carcinomas DOID-0050933 human GSE56443 sample 755	4/259	0.197461	0.982797	0	0	1.77427	2.87825	CADM2;ATRNL1;PPP2R2B;PITPNC1
Infantile neuronal ceroid lipofuscinosis C0268281 mouse GSE6678 sample 141	4/262	0.202904	0.982797	0	0	1.75337	2.79667	MEF2C;SYT1;NBEA;CALN1
Status Epilepticus C0038220 rat GSE4236 sample 391	4/264	0.206557	0.982797	0	0	1.73971	2.74383	GRIA1;GRIA2;SYT1;LSAMP
Neurofibromatosis DOID-8712 mouse GSE1482 sample 668	5/360	0.214912	0.982797	0	0	1.59417	2.45108	SYT1;CADM1;PPP2R2B;CADPS;FYN
Chronic phase chronic myelogenous leukemia DOID-8552 human GSE5550 sample 456	4/270	0.21763	0.982797	0	0	1.69994	2.59235	MACF1;PCDH9;SLC1A3;TCF4
idiopathic pulmonary fibrosis DOID-0050156 human GSE24206 sample 868	4/271	0.219491	0.982797	0	0	1.69349	2.56808	GRIA1;PDE4B;PHACTR1;PTPRG
ulcerative colitis DOID-8577 human GSE11223 sample 590	4/271	0.219491	0.982797	0	0	1.69349	2.56808	FSTL5;GRM7;MAN2A1;ERBB4
asthma DOID-2841 human GSE43696 sample 827	5/365	0.222876	0.982797	0	0	1.57162	2.35923	ERICH1-AS1;AGBL4;MEF2C;NEAT1;RYR3
myelodysplastic syndrome DOID-0050908 human GSE19429 sample 748	4/273	0.223226	0.982797	0	0	1.68073	2.52037	MEF2C;PDE4B;MALAT1;TCF4
Cardiomyopathy, Dilated C0007193 human GSE3585 sample 198	4/274	0.2251	0.982797	0	0	1.67442	2.49691	RBFOX1;MTUS2;NEAT1;FGF12
myelodysplastic syndrome DOID-0050908 human GSE19429 sample 747	4/276	0.228861	0.982797	0	0	1.66193	2.45076	MEF2C;PDE4B;MALAT1;TCF4
Infertility due to azoospermia C1321542 mouse GSE3676 sample 151	3/187	0.23009	0.982797	0	0	1.84024	2.70383	CADM1;PPP2R2B;GRIN2B
Dehydration C0011175 rat GSE4130 sample 23	5/370	0.230929	0.982797	0	0	1.5497	2.2713	GPM6A;KHDRBS3;PTPRN2;MAP2;SLC4A10
Huntington's disease DOID-12858 mouse GSE9038 sample 718	5/371	0.23255	0.982797	0	0	1.54538	2.25417	MEF2C;KCNC2;LHFPL3;ASTN2;MDGA2
Generalized seizures C0234533 mouse GSE6614 sample 169	4/279	0.234531	0.982797	0	0	1.64355	2.38343	GRIA2;CTNND2;TCF4;ANK3
polycystic ovary syndrome DOID-11612 human GSE10946 sample 825	4/280	0.236429	0.982797	0	0	1.63751	2.36147	CADM1;PARD3;GPC5;FBXL7
idiopathic urticaria DOID-1555 human GSE57178 sample 815	3/192	0.24181	0.982797	0	0	1.7911	2.54264	NEGR1;ZBTB20;OXR1
Alzheimer's disease DOID-10652 human GSE36980 sample 519	5/380	0.247281	0.982797	0	0	1.5076	2.10646	CNTN5;ARL15;CNTNAP5;HS6ST3;CALN1
fragile X syndrome DOID-14261 human GSE7329 sample 809	4/288	0.251739	0.982797	0	0	1.59074	2.1942	MCTP1;NBEA;MAN2A1;LRRC4C
Idiosyncratic drug effect C0277580 rat GSE2825 sample 304	4/289	0.253668	0.982797	0	0	1.58507	2.17429	PTPRD;ARL15;PLCB1;PTPRG
endometriosis DOID-289 human GSE6364 sample 946	5/384	0.253906	0.982797	0	0	1.49138	2.04437	PDZD2;MALAT1;ANK3;CTNNA2;NEAT1
anemia DOID-2355 human GSE4619 sample 791	4/290	0.2556	0.982797	0	0	1.57945	2.15459	MEF2C;PDE4B;TCF4;NEAT1
schizophrenia DOID-5419 human GSE17612 sample 853	4/291	0.257535	0.982797	0	0	1.57387	2.1351	GPM6A;SYT1;LHFPL3;NEAT1
Papillary Carcinoma of the Thyroid C0238463 human GSE3678 sample 306	4/292	0.259473	0.982797	0	0	1.56832	2.11582	MEF2C;NFIA;TCF4;KCNAB1
Sendai virus infection C1319860 mouse GSE10211 sample 82	4/292	0.259473	0.982797	0	0	1.56832	2.11582	CADM1;ZBTB20;ANK3;PITPNC1
Huntington's disease DOID-12858 mouse GSE19780 sample 527	4/294	0.263358	0.982797	0	0	1.55735	2.07787	KCNIP4;LHFPL3;CACNA1C;ASTN2
Pulmonary Fibrosis C0034069 mouse GSE2640 sample 406	4/294	0.263358	0.982797	0	0	1.55735	2.07787	MACF1;CADM1;MALAT1;NEAT1
skin squamous cell carcinoma DOID-3151 human GSE45164 sample 657	4/295	0.265305	0.982797	0	0	1.55191	2.0592	DPP6;PDZD2;DMD;FBXL7
myelodysplastic syndrome DOID-0050908 human GSE19429 sample 749	4/300	0.275078	0.982797	0	0	1.52531	1.96872	MEF2C;PCDH9;PDE4B;TCF4
idiopathic pulmonary fibrosis DOID-0050156 human GSE44723 sample 851	4/300	0.275078	0.982797	0	0	1.52531	1.96872	ROBO2;MCTP1;MAP2;CADPS
Infection by Aspergillus fumigatus C0276655 human GSE6965 sample 386	4/300	0.275078	0.982797	0	0	1.52531	1.96872	MEF2C;SLC1A3;MALAT1;NEAT1
Ulcerative Colitis C0009324 human GSE1710 sample 264	5/397	0.27573	0.982797	0	0	1.44096	1.85643	KIAA1217;CNTNAP2;FYN;RYR3;GRIA4
Granulomatous Disease, Chronic C0018203 human GSE935 sample 371	4/301	0.27704	0.982797	0	0	1.52009	1.95118	AUTS2;NEBL;TNR;DLGAP1
fragile X syndrome DOID-14261 human GSE7329 sample 515	4/301	0.27704	0.982797	0	0	1.52009	1.95118	PDZD2;MCTP1;MAN2A1;ANK3
Hepatic Cirrhosis C0023890 rat GSE1843 sample 372	4/303	0.280971	0.982797	0	0	1.50977	1.91666	MACF1;ARL15;MAN2A1;DLC1
MDS - Myelodysplastic syndrome C0026986 human GSE4619 sample 206	4/305	0.284911	0.982797	0	0	1.49959	1.88285	MEF2C;PCDH9;PDE4B;TCF4
Senescence C0001792 mouse GSE5078 sample 331	4/307	0.28886	0.982797	0	0	1.48954	1.84973	MACF1;CADM1;PPP2R2B;CTNND2
autism spectrum disorder DOID-0060041 human GSE7329 sample 1034	4/308	0.290837	0.982797	0	0	1.48456	1.83342	MCTP1;MAN2A1;DLGAP1;LRRC4C
schizophrenia DOID-5419 human GSE62105 sample 547	4/311	0.29678	0.982797	0	0	1.46983	1.78549	RBFOX1;NFIA;ERBB4;CSMD1
colon cancer DOID-219 mouse GSE63032 sample 662	4/317	0.30871	0.982797	0	0	1.44121	1.69393	MEF2C;DOCK4;KCNAB1;PITPNC1
hepatocellular carcinoma DOID-684 human GSE60502 sample 656	4/317	0.30871	0.982797	0	0	1.44121	1.69393	GPM6A;FRMPD4;KCNAB1;ANK3
neurofibromatosis DOID-8712 mouse GSE1482 sample 666	4/318	0.310704	0.982797	0	0	1.43655	1.6792	GRIA1;MACF1;PPP2R2B;FYN
Nephroblastoma C0027708 human GSE2712 sample 418	5/419	0.313473	0.982797	0	0	1.36284	1.58095	PTPRD;PCDH9;NEBL;ERBB4;THSD7A
pancreatic ductal adenocarcinoma DOID-3498 mouse GSE61412 sample 698	3/223	0.316073	0.982797	0	0	1.53629	1.76946	CHRM3;PTPRN2;LRRC7
Preeclampsia C0032914 human GSE4707 sample 352	3/225	0.320912	0.982797	0	0	1.52229	1.73022	NBEA;ANK3;NEAT1
Escherichia coli infection of the central nervous system C1320188 mouse GSE3253 sample 341	3/225	0.320912	0.982797	0	0	1.52229	1.73022	SLC1A2;MALAT1;HCN1
Huntington's disease DOID-12858 mouse GSE3248 sample 725	4/324	0.32269	0.982797	0	0	1.40918	1.59387	GRIA1;MACF1;GRID2;KCND2
Non-syndromic cleft lip and palate DOID-9296 human GSE42589 sample 618	5/426	0.325637	0.982797	0	0	1.3397	1.5031	NTM;CADPS;KCNQ5;TCF4;OPCML
Acute Lung Injury C0242488 mouse GSE1871 sample 152	3/228	0.328171	0.982797	0	0	1.50176	1.67329	MACF1;CADM1;NEAT1
Down syndrome DOID-14250 human GSE35561 sample 1062	3/229	0.330591	0.982797	0	0	1.49504	1.65482	CHRM3;PDE4B;MDGA2
systemic lupus erythematosus DOID-9074 human GSE55447 sample 1075	4/333	0.340729	0.982797	0	0	1.36999	1.47503	MEF2C;NLGN1;CNTNAP5;NPAS3
tibial muscular dystrophy DOID-9884 human GSE42806 sample 539	4/335	0.344744	0.982797	0	0	1.36158	1.45002	AUTS2;MALAT1;KCNQ5;NEAT1
Squamous cell carcinoma of lung C0149782 human GSE3268 sample 441	4/335	0.344744	0.982797	0	0	1.36158	1.45002	GPM6A;DOCK4;PDZD2;CADM1
acute myeloid leukemia DOID-9119 human GSE9476 sample 782	5/437	0.344853	0.982797	0	0	1.30484	1.38918	AUTS2;PDE4B;TCF4;FYN;PITPNC1
ulcerative colitis DOID-8577 human GSE11223 sample 588	4/336	0.346752	0.982797	0	0	1.35741	1.43769	CHRM3;SLC1A3;XKR4;NPAS3
prolactinoma DOID-5394 human GSE36314 sample 636	5/440	0.35011	0.982797	0	0	1.29564	1.35979	GPM6A;FAM155A;CADPS;MTUS2;ST18
Down Syndrome C0013080 human GSE5390 sample 277	2/140	0.352091	0.982797	0	0	1.63023	1.70174	RBFOX1;STXBP5L
progressive myoclonus epilepsy DOID-891 mouse GSE47516 sample 518	4/339	0.352777	0.982797	0	0	1.34504	1.40143	DPP6;FAM19A2;UNC5D;TRPM3
adrenoleukodystrophy DOID-10588 human GSE34309 sample 865	4/342	0.358803	0.982797	0	0	1.3329	1.3662	CNTNAP2;SYN3;OXR1;RNF220
Lewy body dementia DOID-12217 human GSE49036 sample 1067	3/242	0.362	0.982797	0	0	1.41278	1.43555	ROBO2;CACNA1A;CNTN4
glaucoma associated with systemic syndromes DOID-1686 mouse GSE26299 sample 487	4/345	0.364829	0.982797	0	0	1.32097	1.33197	LRRTM4;KCNIP4;UNC5D;CTNNA2
Anterior Horn Cell Disease C0154681 human GSE1481 sample 208	4/346	0.366837	0.982797	0	0	1.31704	1.32078	FYN;ANK3;QKI;MAP4K4
Cancer of the testis C0153594 human GSE1818 sample 246	5/452	0.371172	0.982797	0	0	1.26008	1.24885	ATP8A2;KHDRBS3;PDZD2;CADM1;SORBS1
Primary open angle glaucoma C0339573 human GSE2705 sample 257	3/249	0.378832	0.982797	0	0	1.37209	1.33184	DOCK4;ZBTB20;NEAT1
Ulcerative Colitis C0009324 human GSE6731 sample 249	4/354	0.382889	0.982797	0	0	1.28641	1.23497	CHRM3;NLGN1;AUTS2;NEAT1
lung squamous cell carcinoma DOID-3907 human GSE51852 sample 734	3/253	0.388411	0.982797	0	0	1.34986	1.27655	GRIA1;GPM6A;FGF14
polycystic ovary syndrome DOID-11612 human GSE48301 sample 806	4/359	0.392901	0.982797	0	0	1.26796	1.18453	RYR2;MEF2C;NLGN1;SLC8A1
prostate cancer DOID-10283 human GSE55945 sample 835	4/359	0.392901	0.982797	0	0	1.26796	1.18453	NFIA;ZBTB20;MALAT1;SORBS1
Chronic Lymphocytic Leukemia (Chronic B-lymphocytic leukemia) UMLS CUI-C0023434 human GSE26725 sample 745	4/359	0.392901	0.982797	0	0	1.26796	1.18453	PTPRN2;MACROD2;ANK3;MAP4K4
methylmalonic acidemia DOID-14749 mouse GSE41044 sample 476	3/256	0.395572	0.982797	0	0	1.33365	1.23686	NEGR1;SLC8A1;STXBP5L
Systemic lupus erythematosus (SLE) C0024141 human GSE12374 sample 123	3/256	0.395572	0.982797	0	0	1.33365	1.23686	DGKB;NRXN1;MACROD2
lung cancer DOID-1324 mouse GSE14277 sample 615	4/365	0.404884	0.982797	0	0	1.24651	1.12703	MACF1;PHLPP1;CADM1;DLC1
silicosis DOID-10325 rat GSE29110 sample 983	3/260	0.405087	0.982797	0	0	1.31263	1.18616	MACF1;NEBL;PHACTR1
asthma DOID-2841 human GSE27011 sample 567	3/263	0.412195	0.982797	0	0	1.29728	1.14973	PCDH9;FAM19A2;RGS6
Crohn's disease DOID-8778 human GSE6731 sample 758	3/263	0.412195	0.982797	0	0	1.29728	1.14973	AUTS2;ZBTB20;ANK3
Dehydration C0011175 rat GSE3110 sample 443	3/263	0.412195	0.982797	0	0	1.29728	1.14973	GPM6A;GRIA2;PHACTR1
asthma DOID-2841 human GSE43696 sample 828	4/369	0.412851	0.982797	0	0	1.23259	1.09044	ERICH1-AS1;ATP8A2;MAP2;RYR3
B-cell chronic lymphocytic leukaemia/small lymphocytic lymphoma C0023458 human GSE8835 sample 194	4/372	0.418811	0.982797	0	0	1.22235	1.06386	AUTS2;MAN2A1;PDE4B;FYN
lupus erythematosus DOID-8857 human GSE30153 sample 739	3/267	0.421631	0.982797	0	0	1.27736	1.10316	GPM6A;CNTNAP2;ZNF804A
sickle-cell anemia DOID-10923 human GSE16728 sample 507	3/268	0.423983	0.982797	0	0	1.27248	1.09187	DPP10;FSTL5;XKR4
Endometriosis C0014175 human GSE7305 sample 149	3/270	0.428676	0.982797	0	0	1.26282	1.06967	ZBTB20;TCF4;NEAT1
Huntington's disease DOID-12858 mouse GSE19780 sample 528	3/272	0.433356	0.982797	0	0	1.2533	1.048	TMEM132D;CNTNAP2;ST18
Depression DOID-1595 mouse GSE26025 sample 463	3/273	0.435691	0.982797	0	0	1.2486	1.03736	DPP10;CNTN5;PDE4D
polycystic ovary syndrome DOID-11612 human GSE48301 sample 560	3/275	0.44035	0.982797	0	0	1.23929	1.01645	RYR2;MEF2C;PCDH7
inclusion body myositis DOID-3429 human GSE48280 sample 706	2/169	0.442151	0.982797	0	0	1.34515	1.09778	ATRNL1;HCN1
ulcerative colitis DOID-8577 human GSE6731 sample 759	4/384	0.442506	0.982797	0	0	1.18302	0.964521	CHRM3;NLGN1;AUTS2;NEAT1
chronic lymphocytic leukemia DOID-1040 human GSE6691 sample 786	3/285	0.463418	0.982797	0	0	1.19473	0.918898	MACF1;FYN;MAP4K4
asthma DOID-2841 human GSE31773 sample 712	3/286	0.465702	0.982797	0	0	1.19045	0.90975	DAB1;LHFPL3;CTNNA2
amyotrophic lateral sclerosis DOID-332 mouse GSE10953 sample 680	2/177	0.465801	0.982797	0	0	1.28313	0.980312	RBFOX1;MALAT1
Epilepsy DOID-1826 rat GSE2880 sample 804	4/397	0.46785	0.982797	0	0	1.14313	0.868327	PPP2R2B;CTNND2;LSAMP;PIP4K2A
Cardiomyopathy, Dilated C0007193 human GSE9800 sample 115	3/291	0.477062	0.982797	0	0	1.16948	0.865543	DPP6;ADCY2;MACROD2
Acne C0702166 human GSE10432 sample 297	3/292	0.479321	0.982797	0	0	1.16537	0.856999	KHDRBS3;DGKB;MAP2
Alzheimer's disease DOID-10652 human GSE36980 sample 524	3/292	0.479321	0.982797	0	0	1.16537	0.856999	NRXN3;GRIN2B;HCN1
Senescence C0001792 rat GSE3531 sample 167	3/292	0.479321	0.982797	0	0	1.16537	0.856999	CHRM3;PPP2R2B;OXR1
melanoma DOID-1909 human GSE6887 sample 950	3/293	0.481575	0.982797	0	0	1.1613	0.848552	GPM6A;MEF2C;TCF4
systemic lupus erythematosus DOID-9074 human GSE61635 sample 816	3/294	0.483824	0.982797	0	0	1.15725	0.840199	CNTNAP2;NFIA;PIP4K2A
amyotrophic lateral sclerosis DOID-332 human GSE833 sample 1007	2/184	0.486005	0.982797	0	0	1.23334	0.889902	GRIA2;FRMPD4
psoriasis DOID-8893 human GSE52471 sample 690	3/297	0.490546	0.982797	0	0	1.14526	0.815698	PHLPP1;FRMD4A;ADCY2
ulcerative colitis DOID-8577 human GSE11223 sample 591	3/298	0.492777	0.982797	0	0	1.14132	0.807712	CNTNAP2;PHLPP1;CTNND2
Neurological pain disorder C0423704 rat GSE18803 sample 212	2/189	0.500146	0.982797	0	0	1.20006	0.83147	RYR2;DSCAM
Familial combined hyperlipidaemia C0020474 human GSE11393 sample 267	3/302	0.501653	0.982797	0	0	1.12582	0.776645	AUTS2;PHACTR1;NEAT1
Cystic Fibrosis C0010674 mouse GSE3100 sample 138	2/191	0.505732	0.982797	0	0	1.18724	0.8094	NEGR1;PHACTR1
idiopathic pulmonary fibrosis DOID-0050156 human GSE24206 sample 869	2/192	0.50851	0.982797	0	0	1.18093	0.798629	GRIA1;PTPRG
cardiomyopathy DOID-0050700 human GSE9128 sample 781	3/310	0.519166	0.982797	0	0	1.09604	0.718485	AUTS2;MAN2A1;PDE4D
Retinoschisis C0152439 mouse GSE5581 sample 146	2/196	0.519521	0.982797	0	0	1.15635	0.757232	SYT1;MAP2
breast cancer DOID-1612 human GSE14943 sample 504	2/197	0.522248	0.982797	0	0	1.15036	0.747288	NTM;PDE4B
Sickle Cell Anemia C0002895 human GSE9877 sample 109	2/197	0.522248	0.982797	0	0	1.15036	0.747288	MACF1;MAN2A1
Huntington's disease DOID-12858 human GSE3248 sample 724	3/312	0.523493	0.982797	0	0	1.08883	0.704724	GRID2;SYT1;KCND2
Huntington's disease DOID-12858 mouse GSE9038 sample 717	3/312	0.523493	0.982797	0	0	1.08883	0.704724	TMEM132D;CNTNAP2;ST18
Leukemia, Chronic T-Cell C2363142 human GSE5788 sample 74	3/313	0.525649	0.982797	0	0	1.08526	0.697955	PDE4B;PIP4K2A;FYN
systemic lupus erythematosus DOID-9074 human GSE55447 sample 1074	3/313	0.525649	0.982797	0	0	1.08526	0.697955	AGBL4;ATP8A2;MDGA2
ulcerative colitis DOID-8577 human GSE6731 sample 760	3/314	0.527799	0.982797	0	0	1.08172	0.69126	AUTS2;ANK3;NEAT1
schizophrenia DOID-5419 human GSE27383 sample 548	3/315	0.529944	0.982797	0	0	1.07819	0.684636	GPM6A;CNTNAP2;PTPRN2
melanoma DOID-1909 human GSE6887 sample 949	3/315	0.529944	0.982797	0	0	1.07819	0.684636	RYR2;SYT1;OXR1
schizophrenia DOID-5419 human GSE12679 sample 767	3/315	0.529944	0.982797	0	0	1.07819	0.684636	TENM2;MAML2;NEAT1
intracranial aneurysm DOID-10941 human GSE26969 sample 744	4/437	0.542914	0.982797	0	0	1.03539	0.632421	GRIA2;DAB1;SORBS1;NEAT1
osteoarthritis DOID-8398 human GSE16464 sample 752	2/206	0.546325	0.982797	0	0	1.0991	0.664454	MALAT1;NEAT1
Parkinson's disease DOID-14330 human GSE19587 sample 740	2/207	0.548947	0.982797	0	0	1.09369	0.655941	GPM6A;SLC1A3
prostate cancer DOID-10283 human GSE55945 sample 834	3/325	0.551093	0.982797	0	0	1.04417	0.622174	NFIA;ZBTB20;SORBS1
tuberculosis DOID-399 human GSE54992 sample 564	3/325	0.551093	0.982797	0	0	1.04417	0.622174	TENM2;PDE4B;KCTD16
Obstructive sleep apnea C0520679 mouse GSE1873 sample 217	3/325	0.551093	0.982797	0	0	1.04417	0.622174	PTPRD;MALAT1;NEAT1
Parkinson's disease DOID-14330 human GSE19587 sample 741	4/442	0.551923	0.982797	0	0	1.02331	0.608198	PCDH9;MAN2A1;CTNND2;PIP4K2A
Congestive heart disease C0018802 mouse GSE2236 sample 258	3/328	0.557328	0.982797	0	0	1.03438	0.604698	RYR2;MEF2C;NEAT1
facioscapulohumeral muscular dystrophy DOID-11727 human GSE36398 sample 673	2/214	0.56701	0.982797	0	0	1.0572	0.599831	PRKCA;RYR3
invasive ductal carcinoma DOID-3008 human GSE5764 sample 626	3/335	0.571676	0.982797	0	0	1.0122	0.566007	AUTS2;MALAT1;NEAT1
polycystic ovary syndrome DOID-11612 human GSE34526 sample 797	2/218	0.577096	0.982797	0	0	1.03741	0.570311	AUTS2;MAN2A1
Rett Syndrome C0035372 human GSE6955 sample 390	2/219	0.579591	0.982797	0	0	1.03257	0.563199	SYT1;PLCB1
chronic myeloid leukemia DOID-8552 mouse GSE48438 sample 501	2/220	0.582075	0.982797	0	0	1.02779	0.556192	PTPRD;ARL15
Endometriosis C0014175 human GSE6364 sample 393	3/341	0.583745	0.982797	0	0	0.99393	0.535023	MALAT1;CTNNA2;NEAT1
Crohn's disease DOID-8778 human GSE1710 sample 992	4/461	0.585293	0.982797	0	0	0.9798	0.524823	PIP4K2A;FYN;RYR3;GRIA4
amyotrophic lateral sclerosis DOID-332 mouse GSE3343 sample 685	4/462	0.587009	0.982797	0	0	0.977611	0.520787	GPM6A;SYT1;MAP2;OXR1
Down Syndrome C0013080 human GSE10758 sample 310	2/224	0.591904	0.982797	0	0	1.00906	0.529162	RIMS2;CNTNAP2
Cardiac Hypertrophy C1383860 rat GSE1055 sample 354	4/467	0.595531	0.982797	0	0	0.966804	0.501096	MACF1;NEBL;MSI2;SLC8A1
Hepatitis, Autoimmune C0241910 mouse GSE867 sample 230	2/227	0.599163	0.982797	0	0	0.995454	0.509892	MAN2A1;ZBTB20
Huntington's disease DOID-12858 mouse GSE3248 sample 726	2/228	0.601562	0.982797	0	0	0.990999	0.503652	GRID2;CACNA1A
facioscapulohumeral muscular dystrophy DOID-11727 human GSE15090 sample 540	2/228	0.601562	0.982797	0	0	0.990999	0.503652	DAB1;RYR3
colon cancer DOID-219 mouse GSE63032 sample 661	2/228	0.601562	0.982797	0	0	0.990999	0.503652	RBFOX1;RGS6
Spinal Cord Injury C0037929 rat GSE2599 sample 426	3/351	0.603379	0.982797	0	0	0.964873	0.487463	PPP2R2B;CADPS;NRXN3
stomach cancer DOID-10534 human GSE49515 sample 553	3/353	0.607233	0.982797	0	0	0.959261	0.478521	ARL15;CTNND2;PHACTR1
Neurofibromatosis DOID-8712 mouse GSE1482 sample 667	2/231	0.608692	0.982797	0	0	0.977867	0.485456	SYT1;ADCY2
Septic Shock C0036983 human GSE9692 sample 307	1/106	0.61123	0.982797	0	0	1.06699	0.525261	PCDH9
allergic contact dermatitis DOID-3042 human GSE6281 sample 925	3/357	0.614865	0.982797	0	0	0.948227	0.461172	ROBO2;MCTP1;FAM19A2
Asthma C0004096 human GSE4302 sample 318	3/357	0.614865	0.982797	0	0	0.948227	0.461172	MEF2C;MAP2;RYR3
systemic lupus erythematosus DOID-9074 human GSE55447 sample 1078	3/358	0.616758	0.982797	0	0	0.945508	0.456944	GPM6A;ADARB2;LRRC4C
Cardiac Hypertrophy C1383860 mouse GSE5500 sample 5	2/235	0.618048	0.982797	0	0	0.960883	0.462367	ST18;RYR3
colitis DOID-0060180 human GSE6731 sample 761	3/359	0.618644	0.982797	0	0	0.942803	0.452757	AUTS2;ANK3;NEAT1
relapsing-remitting multiple sclerosis DOID-2378 human GSE16461 sample 879	3/359	0.618644	0.982797	0	0	0.942803	0.452757	PDE4B;FYN;NEAT1
Senescence C0001792 human GSE1786 sample 114	2/236	0.62036	0.982797	0	0	0.956728	0.456795	MEF2C;RYR3
Psoriasis vulgaris C0263361 human GSE14905 sample 93	2/236	0.62036	0.982797	0	0	0.956728	0.456795	DAB1;MALAT1
Duchenne muscular dystrophy DOID-11723 human GSE6011 sample 674	2/237	0.622661	0.982797	0	0	0.952608	0.4513	DMD;NEAT1
glomerulosclerosis DOID-0050851 mouse GSE20844 sample 492	3/362	0.624266	0.982797	0	0	0.934781	0.440448	GRIP1;TENM2;ASTN2
ulcerative colitis DOID-8577 human GSE9452 sample 924	2/239	0.627232	0.982797	0	0	0.944473	0.440538	DPP10;GLIS3
systemic juvenile idiopathic arthritis (sJIA) (subgroup-extended oligo) DOID-848 human GSE21521 sample 576	2/240	0.629502	0.982797	0	0	0.940456	0.435268	NEBL;PPP2R2B
discoid lupus erythematosus UMLS CUI-C0024138 human GSE52471 sample 689	2/240	0.629502	0.982797	0	0	0.940456	0.435268	DLG2;ADCY2
Influenza C0021400 mouse GSE3203 sample 85	2/241	0.63176	0.982797	0	0	0.936473	0.430071	FMNL2;NEAT1
Pompe disease, infantile-onset form UMLS CUI-C0342751 human GSE38680 sample 870	2/242	0.634008	0.982797	0	0	0.932524	0.424945	KCNQ5;LRP1B
osteoarthritis DOID-8398 rat GSE8077 sample 944	2/245	0.640688	0.982797	0	0	0.92087	0.409983	PPP2R2B;LHFPL3
Huntington's disease DOID-12858 mouse GSE3248 sample 727	2/246	0.642894	0.982797	0	0	0.917049	0.40513	GRID2;KCND2
in situ carcinoma DOID-8719 mouse GSE64756 sample 655	2/246	0.642894	0.982797	0	0	0.917049	0.40513	GPM6A;CNTNAP2
Down syndrome DOID-14250 human GSE42956 sample 1060	2/247	0.645089	0.982797	0	0	0.913259	0.400343	AUTS2;SLC1A3
Dehydration C0011175 rat GSE3131 sample 60	3/375	0.647974	0.982797	0	0	0.901511	0.39117	PPP2R2B;CADPS;LSAMP
HIV encephalitis C0276548 human GSE3489 sample 2	2/249	0.649446	0.982797	0	0	0.905772	0.390963	GPM6A;SYT1
salivary gland adenoid cystic carcinoma DOID-4866 human GSE36820 sample 511	2/249	0.649446	0.982797	0	0	0.905772	0.390963	MALAT1;NEAT1
breast cancer DOID-1612 human GSE26910 sample 602	3/376	0.649753	0.982797	0	0	0.899048	0.387636	MCTP1;NBEA;THSD7A
polycystic ovary syndrome DOID-11612 human GSE48301 sample 818	3/378	0.653293	0.982797	0	0	0.894161	0.380671	RYR2;MEF2C;NLGN1
myotonic dystrophy type 1 DOID-11722 human GSE7178 sample 1052	2/252	0.655904	0.982797	0	0	0.894766	0.37736	MAP2;MALAT1
pancreatic cancer DOID-1793 human GSE18670 sample 483	2/253	0.658035	0.982797	0	0	0.891155	0.372946	MEF2C;MCTP1
Diabetic Retinopathy C0011884 rat GSE1979 sample 189	2/254	0.660156	0.982797	0	0	0.887574	0.368591	CADPS;NRXN3
fetal alcohol spectrum disorder DOID-0050696 mouse GSE34305 sample 525	2/255	0.662267	0.982797	0	0	0.88402	0.364293	TMTC2;ST18
Bacterial Infection C0004623 mouse GSE6435 sample 133	2/258	0.668535	0.982797	0	0	0.873527	0.35174	ROBO2;MEF2C
Asthma, allergic C0155877 mouse GSE2276 sample 348	2/262	0.676747	0.982797	0	0	0.859912	0.335759	MACF1;PITPNC1
Retinitis Pigmentosa C0035334 mouse GSE128 sample 33	2/262	0.676747	0.982797	0	0	0.859912	0.335759	CADM1;CTNND2
CML - Chronic myeloid leukemia C0023473 human GSE11889 sample 403	2/266	0.684795	0.982797	0	0	0.84671	0.320595	PDE4B;TCF4
schizophrenia DOID-5419 human GSE17612 sample 852	2/268	0.688757	0.982797	0	0	0.840258	0.313305	TENM2;SLC1A2
Type 2 diabetes mellitus C0011860 rat GSE2470 sample 238	2/268	0.688757	0.982797	0	0	0.840258	0.313305	PTPRN2;CADPS
sporadic breast cancer DOID-8029 human GSE3744 sample 979	3/400	0.690551	0.982797	0	0	0.843655	0.312376	NBEA;ERBB4;NEAT1
allergic asthma DOID-9415 human GSE41649 sample 716	2/271	0.694623	0.982797	0	0	0.830759	0.302717	CHRM3;ZBTB20
Turner syndrome DOID-3491 human GSE58435 sample 1059	2/272	0.696559	0.982797	0	0	0.82764	0.299277	UNC5D;SGCZ
Ventilator-associated lung injury C0340257 mouse GSE2411 sample 355	2/272	0.696559	0.982797	0	0	0.82764	0.299277	MAN2A1;NEAT1
Nemaline Myopathy C0206157 mouse GSE3384 sample 317	1/134	0.697348	0.982797	0	0	0.841165	0.303215	PLCB1
endometrial cancer DOID-1380 human GSE17025 sample 848	2/273	0.698484	0.982797	0	0	0.824544	0.295882	MALAT1;TCF4
endometrial cancer DOID-1380 human GSE17025 sample 845	2/273	0.698484	0.982797	0	0	0.824544	0.295882	MALAT1;TCF4
papillary thyroid carcinoma DOID-3969 human GSE54958 sample 653	3/406	0.700179	0.982797	0	0	0.830838	0.296127	DPP6;LRRTM4;LRP1B
polycystic ovary syndrome DOID-11612 human GSE8157 sample 880	2/275	0.702304	0.982797	0	0	0.81842	0.28922	RBFOX1;RYR3
Hypoxia C0242184 human GSE4483 sample 440	2/275	0.702304	0.982797	0	0	0.81842	0.28922	MACF1;TMTC2
Ischemic stroke UMLS CUI-C0948008 human GSE22255 sample 856	2/277	0.706084	0.982797	0	0	0.812384	0.282726	MALAT1;TCF4
Tendonopathy 971 human GSE26051 sample 470	2/278	0.70796	0.982797	0	0	0.8094	0.279541	MEF2C;SORBS1
autism spectrum disorder DOID-0060041 human GSE7329 sample 1033	2/279	0.709825	0.982797	0	0	0.806436	0.276396	PDZD2;MCTP1
familial hypercholesterolemia DOID-13810 human GSE6088 sample 907	2/279	0.709825	0.982797	0	0	0.806436	0.276396	PIP4K2A;NEAT1
myotonic dystrophy type 1 DOID-11722 human GSE7178 sample 1051	2/279	0.709825	0.982797	0	0	0.806436	0.276396	MALAT1;CTNNA2
JRA - Juvenile rheumatoid arthritis C0553662 human GSE7753 sample 176	2/280	0.71168	0.982797	0	0	0.803494	0.27329	MALAT1;NEAT1
Diabetic Nephropathy C0011881 human GSE1009 sample 223	3/414	0.712663	0.982797	0	0	0.81433	0.275852	PTPRD;DPP6;THSD7A
progressive myoclonus epilepsy DOID-891 mouse GSE47516 sample 516	1/141	0.715729	0.982797	0	0	0.798823	0.267169	PDE4D
neurofibromatosis DOID-8712 mouse GSE29343 sample 670	1/142	0.718263	0.982797	0	0	0.793117	0.262458	PDE4B
Cushing Syndrome C0010481 human GSE4060 sample 1	2/284	0.719003	0.982797	0	0	0.791935	0.261251	MALAT1;NEAT1
facioscapulohumeral muscular dystrophy DOID-11727 human GSE36398 sample 672	2/286	0.722606	0.982797	0	0	0.786278	0.255455	KCNQ5;RYR3
hepatocellular carcinoma DOID-684 human GSE58208 sample 735	1/145	0.72573	0.982797	0	0	0.776476	0.24892	MALAT1
Bipolar Disorder C0005586 human GSE7036 sample 181	2/288	0.72617	0.982797	0	0	0.780699	0.249801	MACROD2;NEAT1
Huntington's disease DOID-12858 mouse GSE3248 sample 722	2/288	0.72617	0.982797	0	0	0.780699	0.249801	GRID2;KCND2
Barrett's esophagus DOID-9206 human GSE34619 sample 596	2/289	0.727937	0.982797	0	0	0.777939	0.247027	PDZD2;SLC1A3
multiple myeloma DOID-9538 human GSE6691 sample 787	1/146	0.728175	0.982797	0	0	0.771082	0.244598	CTNNA3
hepatitis C virus related hepatocellular carcinoma UMLS CUI-C1333978 human GSE58208 sample 736	1/147	0.730598	0.982797	0	0	0.765761	0.240366	MALAT1
Barrett's esophagus DOID-9206 human GSE34619 sample 453	2/291	0.731444	0.982797	0	0	0.772477	0.241581	PDZD2;SLC1A3
Muscular Dystrophy C0026850 mouse GSE2629 sample 18	2/291	0.731444	0.982797	0	0	0.772477	0.241581	MEF2C;ANK3
Arrhythmogenic Right Ventricular Cardiomyopathy C0349788 mouse GSE4120 sample 432	2/292	0.733182	0.982797	0	0	0.769773	0.238908	CACNA1C;NEAT1
Intestinal metaplasia of gastric mucosa C0267187 human GSE2669 sample 349	2/292	0.733182	0.982797	0	0	0.769773	0.238908	MAN2A1;FYN
Premature aging C0231341 human GSE10123 sample 55	2/292	0.733182	0.982797	0	0	0.769773	0.238908	CHRM3;PCDH7
Polycystic Ovary Syndrome C0032460 human GSE6798 sample 292	2/294	0.736631	0.982797	0	0	0.764423	0.233659	RBFOX1;RYR3
asthma DOID-2841 human GSE31773 sample 713	2/294	0.736631	0.982797	0	0	0.764423	0.233659	DAB1;CTNNA2
Cardiomyopathy, Dilated C0007193 human GSE3586 sample 323	1/150	0.73774	0.982797	0	0	0.750229	0.228192	MALAT1
endometrial cancer DOID-1380 human GSE17025 sample 843	2/295	0.738342	0.982797	0	0	0.761775	0.231083	MALAT1;TCF4
ulcerative colitis DOID-8577 human GSE11223 sample 593	2/297	0.741734	0.982797	0	0	0.756533	0.226025	PTPRN2;LUZP2
renal cell carcinoma DOID-4450 human GSE38424 sample 664	2/298	0.743416	0.982797	0	0	0.753938	0.223542	SLC1A3;PRKCA
endometrial cancer DOID-1380 human GSE17025 sample 846	2/298	0.743416	0.982797	0	0	0.753938	0.223542	MALAT1;TCF4
prostate cancer DOID-10283 human GSE3325 sample 990	2/304	0.753314	0.982797	0	0	0.738732	0.209263	ZBTB20;MALAT1
psoriasis DOID-8893 human GSE53431 sample 813	2/305	0.754932	0.982797	0	0	0.736256	0.206982	NTM;PRKCA
polycystic ovary syndrome DOID-11612 human GSE10946 sample 826	2/306	0.75654	0.982797	0	0	0.733797	0.204729	DPP10;KHDRBS3
Down Syndrome C0013080 mouse GSE1611 sample 105	2/306	0.75654	0.982797	0	0	0.733797	0.204729	SYT1;KCND2
psoriasis DOID-8893 mouse GSE27628 sample 824	2/307	0.75814	0.982797	0	0	0.731354	0.202503	DAB1;AFF3
idiopathic pulmonary fibrosis DOID-0050156 human GSE24206 sample 867	2/307	0.75814	0.982797	0	0	0.731354	0.202503	PDE4D;PDE4B
adenosquamous cell lung carcinoma DOID-4829 human GSE51852 sample 731	2/308	0.75973	0.982797	0	0	0.728926	0.200303	GPM6A;FGF14
cerebral palsy DOID-1969 human GSE31243 sample 877	2/309	0.761311	0.982797	0	0	0.726515	0.19813	ANK3;OXR1
psoriasis DOID-8893 human GSE13355 sample 837	2/309	0.761311	0.982797	0	0	0.726515	0.19813	SDK1;NFIA
Depression 1596 human GSE12654 sample 462	2/309	0.761311	0.982797	0	0	0.726515	0.19813	DPP6;PCDH9
Williams-Beuren syndrome DOID-1928 human GSE16715 sample 903	2/310	0.762884	0.982797	0	0	0.724119	0.195983	NBEA;NEAT1
Insulin Resistance DOID-9352 human GSE36297 sample 581	2/310	0.762884	0.982797	0	0	0.724119	0.195983	RBFOX1;RYR3
Hypertrophy, Left Ventricular C0149721 mouse GSE2459 sample 382	2/311	0.764447	0.982797	0	0	0.721738	0.193861	RYR2;SLC8A1
Serous carcinoma C0206701 human GSE10971 sample 58	2/313	0.767547	0.982797	0	0	0.717023	0.189692	ERBB4;MALAT1
Cardiac Hypertrophy C1383860 mouse GSE1621 sample 51	2/313	0.767547	0.982797	0	0	0.717023	0.189692	RYR2;CACNA1C
Huntington's disease DOID-12858 mouse GSE26001 sample 720	1/164	0.768658	0.982797	0	0	0.685304	0.18031	FRMD4A
acute myeloid leukemia DOID-9119 human GSE9476 sample 783	3/455	0.770447	0.982797	0	0	0.7389	0.192694	DOCK4;AUTS2;PDE4B
Cancer of the Intestine C0346627 mouse GSE3915 sample 90	2/315	0.770612	0.982797	0	0	0.712369	0.185622	MAP2;MALAT1
Sepsis C0243026 mouse GSE4479 sample 150	2/316	0.772132	0.982797	0	0	0.710064	0.183623	MACF1;FYN
acute myocardial infarction DOID-9408 mouse GSE775 sample 1005	1/166	0.772768	0.982797	0	0	0.676928	0.174496	SORBS1
sarcoidosis DOID-11335 human GSE19314 sample 708	2/317	0.773642	0.982797	0	0	0.707773	0.181647	CNTNAP2;MAML2
familial hypercholesterolemia DOID-13810 human GSE6088 sample 908	2/317	0.773642	0.982797	0	0	0.707773	0.181647	MALAT1;NEAT1
systemic lupus erythematosus DOID-9074 human GSE55447 sample 1072	2/318	0.775144	0.982797	0	0	0.705497	0.179695	ATP8A2;NXPH1
Adenocarcinoma of lung C0152013 human GSE1987 sample 431	2/319	0.776637	0.982797	0	0	0.703236	0.177765	MACF1;DLC1
Spinal Muscular Atrophy, Infantile C0043116 mouse GSE3075 sample 126	1/168	0.776805	0.982797	0	0	0.668753	0.168904	PIP4K2A
allergic contact dermatitis DOID-3042 human GSE6281 sample 928	2/321	0.779598	0.982797	0	0	0.698755	0.173974	OXR1;RYR3
Type 1 diabetes mellitus C0011854 mouse GSE11 sample 173	2/321	0.779598	0.982797	0	0	0.698755	0.173974	CNTNAP2;GRID2
psoriasis DOID-8893 human GSE14905 sample 754	2/322	0.781065	0.982797	0	0	0.696536	0.172112	ARL15;PDE4B
Huntington's disease DOID-12858 human GSE8762 sample 930	1/171	0.782729	0.982797	0	0	0.656852	0.160908	TCF4
amyotrophic lateral sclerosis DOID-332 mouse GSE3343 sample 683	2/325	0.785417	0.982797	0	0	0.68996	0.166654	TENM2;NBEA
muscular dystrophy DOID-9884 human GSE42806 sample 530	2/325	0.785417	0.982797	0	0	0.68996	0.166654	AUTS2;KCNQ5
H1N1 DOID-0050211 human GSE27131 sample 514	1/173	0.78659	0.982797	0	0	0.649148	0.155827	FYN
Parkinson's disease DOID-14330 human GSE6613 sample 788	2/326	0.78685	0.982797	0	0	0.687795	0.164877	PIP4K2A;FYN
Ankylosing Spondylitides C0038013 human GSE11886 sample 202	2/326	0.78685	0.982797	0	0	0.687795	0.164877	SLC1A2;SORBS1
multiple myeloma DOID-9538 mouse GSE6980 sample 955	2/327	0.788275	0.982797	0	0	0.685644	0.16312	MACF1;MEF2C
Sendai virus infection C1319860 mouse GSE2935 sample 336	2/328	0.789692	0.982797	0	0	0.683506	0.161384	CADM1;PITPNC1
systemic lupus erythematosus DOID-9074 human GSE55447 sample 1077	2/329	0.791101	0.982797	0	0	0.681381	0.159668	RIMS2;GPC5
Turner Syndrome C0041408 mouse GSE1606 sample 218	2/329	0.791101	0.982797	0	0	0.681381	0.159668	DPP6;FYN
ulcerative colitis DOID-8577 human GSE9452 sample 923	1/176	0.792255	0.982797	0	0	0.637922	0.148554	DPP10
pulmonary sarcoidosis DOID-13406 human GSE16538 sample 916	1/177	0.79411	0.982797	0	0	0.634265	0.146219	NEAT1
RA (rheumatoid arthritis) C0003873 human GSE3592 sample 183	2/332	0.795277	0.982797	0	0	0.675082	0.154638	TCF4;FBXL7
Diabetic Neuropathy C0011882 mouse GSE11343 sample 7	2/333	0.796652	0.982797	0	0	0.673008	0.152999	GPM6A;MALAT1
systemic lupus erythematosus DOID-9074 human GSE55447 sample 1076	2/334	0.79802	0.982797	0	0	0.670947	0.15138	RIMS2;AGBL4
Heart Injury C0018805 mouse GSE4710 sample 75	2/336	0.800731	0.982797	0	0	0.666861	0.148197	RYR2;SORBS1
abdominal aortic aneurysm DOID-7693 human GSE47472 sample 1011	2/337	0.802074	0.982797	0	0	0.664836	0.146632	DOCK4;HCN1
Neurological pain disorder C0423704 rat GSE2636 sample 129	2/338	0.803409	0.982797	0	0	0.662823	0.145086	CADPS;OXR1
progressive myoclonus epilepsy DOID-891 mouse GSE47516 sample 517	1/185	0.808368	0.982797	0	0	0.606441	0.129013	RYR3
colorectal adenocarcinoma DOID-0050861 human GSE24514 sample 595	2/342	0.808672	0.982797	0	0	0.654891	0.139074	MAN2A1;SORBS1
testis seminoma DOID-5842 human GSE8607 sample 622	2/343	0.809967	0.982797	0	0	0.652937	0.137614	KHDRBS3;CADM1
Peripheral motor neuropathy C0235025 mouse GSE1947 sample 104	2/344	0.811256	0.982797	0	0	0.650994	0.13617	ERBB4;PRKCA
amyotrophic lateral sclerosis type 10 DOID-0060201 human GSE18632 sample 629	2/344	0.811256	0.982797	0	0	0.650994	0.13617	SYT1;TMTC2
ulcerative colitis DOID-8577 human GSE9452 sample 454	1/187	0.811776	0.982797	0	0	0.599859	0.125089	DPP10
testis seminoma DOID-5842 human GSE8607 sample 623	2/345	0.812536	0.982797	0	0	0.649063	0.134742	KHDRBS3;CADM1
nemaline myopathy DOID-3191 mouse GSE3384 sample 973	1/188	0.813458	0.982797	0	0	0.596621	0.123179	MEF2C
Acute pancreatitis C0001339 mouse GSE3644 sample 376	1/188	0.813458	0.982797	0	0	0.596621	0.123179	MAN2A1
Diabetes DOID-9351 mouse GSE31150 sample 805	2/346	0.813809	0.982797	0	0	0.647143	0.133331	GPC5;FYN
polycystic ovary syndrome DOID-11612 human GSE48301 sample 558	3/492	0.814168	0.982797	0	0	0.681687	0.140147	RYR2;MCTP1;FYN
type 2 diabetes mellitus DOID-9352 human GSE23343 sample 895	2/347	0.815074	0.982797	0	0	0.645234	0.131935	LUZP2;SLC1A2
idiopathic pulmonary fibrosis DOID-0050156 human GSE24206 sample 873	1/199	0.830997	0.982797	0	0	0.56316	0.104258	AFF3
Type 1 diabetes mellitus C0011854 mouse GSE2254 sample 204	1/200	0.832507	0.982797	0	0	0.560302	0.102711	MACF1
ovarian cancer DOID-2394 human GSE14407 sample 611	2/364	0.835438	0.982797	0	0	0.614396	0.110468	MALAT1;PITPNC1
Malignant tumor of pancreas C0346647 human GSE14245 sample 242	1/205	0.839862	0.982797	0	0	0.546429	0.0953617	PTPRN2
Waldenstrom Macroglobulinemia UMLS CUI-C0024419 human GSE6691 sample 785	1/207	0.842713	0.982797	0	0	0.541069	0.0925926	CTNNA3
asthma DOID-2841 human GSE27011 sample 565	1/208	0.844119	0.982797	0	0	0.538428	0.0912427	NEBL
Tachycardia C0039231 rat GSE7999 sample 244	1/208	0.844119	0.982797	0	0	0.538428	0.0912427	DTNA
nemaline myopathy DOID-3191 mouse GSE3384 sample 970	1/210	0.846895	0.982797	0	0	0.533221	0.0886099	PLCB1
nasopharynx carcinoma DOID-9261 human GSE12452 sample 774	2/375	0.847519	0.982797	0	0	0.59594	0.0985936	MEF2C;NBEA
Type 1 diabetes mellitus C0011854 human GSE10586 sample 9	1/213	0.850967	0.982797	0	0	0.525595	0.0848218	PPP2R2B
ulcerative colitis DOID-8577 human GSE11223 sample 587	1/214	0.8523	0.982797	0	0	0.523101	0.0836004	HS6ST3
type 2 diabetes mellitus DOID-9352 human GSE13760 sample 882	2/380	0.852741	0.982797	0	0	0.587906	0.0936533	GRIA2;KCNAB1
cardiomyopathy DOID-0050700 human GSE9128 sample 780	1/215	0.853621	0.982797	0	0	0.52063	0.082399	AUTS2
Gamma-hydroxybutyric acidaemia C0268631 mouse GSE2866 sample 409	1/216	0.85493	0.982797	0	0	0.518182	0.0812173	PPP2R2B
cellular phase chronic idiopathic myelofibrosis 8106 human GSE3410 sample 460	1/218	0.857515	0.982797	0	0	0.513354	0.0789112	PDE4B
nephrosclerosis DOID-11664 human GSE20602 sample 905	1/218	0.857515	0.982797	0	0	0.513354	0.0789112	RALYL
Diamond-Blackfan anaemia DOID-1339 human GSE14335 sample 472	1/218	0.857515	0.982797	0	0	0.513354	0.0789112	NLGN1
nemaline myopathy DOID-3191 mouse GSE3384 sample 977	1/221	0.861305	0.982797	0	0	0.506276	0.0755901	MEF2C
endometriosis DOID-289 human GSE6364 sample 947	2/391	0.863662	0.982797	0	0	0.570959	0.0836873	ZBTB20;NEAT1
Neurogenic Muscular Atrophy C0270948 rat GSE2566 sample 396	2/392	0.864618	0.982797	0	0	0.569465	0.0828388	MEF2C;MSI2
pancreatic cancer DOID-1793 human GSE16515 sample 475	1/224	0.864996	0.982797	0	0	0.499389	0.0724266	MALAT1
Squamous cell carcinoma of mouth C0585362 human GSE3524 sample 295	1/224	0.864996	0.982797	0	0	0.499389	0.0724266	NEBL
LGLL - Large granular lymphocytic leukemia C1522378 human GSE10631 sample 47	1/225	0.866204	0.982797	0	0	0.497134	0.0714057	PDE4B
HIV - Human immunodeficiency virus infection C0019693 human GSE2171 sample 40	1/226	0.867402	0.982797	0	0	0.494899	0.0704009	PDE4B
Viral cardiomyopathy C0264797 human GSE4172 sample 384	1/227	0.868589	0.982797	0	0	0.492684	0.0694122	RYR2
sickle cell anemia DOID-10923 human GSE11524 sample 481	1/229	0.870931	0.982797	0	0	0.488312	0.0674813	ZNF385D
Obesity C0028754 human GSE474 sample 236	1/229	0.870931	0.982797	0	0	0.488312	0.0674813	RYR3
nicotine dependence DOID-0050742 human GSE6264 sample 582	1/230	0.872086	0.982797	0	0	0.486155	0.0665386	ZBTB20
Dental cavity, complex C0399396 human GSE1629 sample 175	2/401	0.872946	0.982797	0	0	0.556362	0.0755996	PTPRD;CADM1
bipolar disorder DOID-3312 human GSE46449 sample 572	2/401	0.872946	0.982797	0	0	0.556362	0.0755996	FAM19A2;MALAT1
Huntington's disease DOID-12858 mouse GSE5786 sample 721	1/231	0.873231	0.982797	0	0	0.484017	0.0656108	NEAT1
Dermatomyositis C0011633 human GSE1551 sample 130	1/232	0.874366	0.982797	0	0	0.481897	0.0646975	MEF2C
systemic juvenile idiopathic arthritis (sJIA) DOID-848 human GSE21521 sample 574	1/233	0.875491	0.982797	0	0	0.479795	0.0637984	PPP2R2B
adrenoleukodystrophy DOID-10588 human GSE34308 sample 709	1/235	0.877711	0.982797	0	0	0.475646	0.0620422	NLGN1
pancreatitis DOID-4989 mouse GSE3644 sample 513	1/238	0.880967	0.982797	0	0	0.469553	0.0595087	MAN2A1
myotonic dystrophy type 1 DOID-11722 human GSE7179 sample 1050	1/239	0.882033	0.982797	0	0	0.467556	0.0586902	MALAT1
Down Syndrome DOID-14250 human GSE23910 sample 494	1/239	0.882033	0.982797	0	0	0.467556	0.0586902	CALN1
non-systemic juvenile idiopathic arthritis (sJIA) (subgroup-RF+ polyarthritis) DOID-848 human GSE21521 sample 579	1/241	0.884137	0.982797	0	0	0.463613	0.0570907	ANK3
testis seminoma DOID-5842 human GSE8607 sample 624	2/414	0.884149	0.982797	0	0	0.538447	0.066299	KHDRBS3;CADM1
nasopharynx carcinoma DOID-9261 human GSE13597 sample 808	1/242	0.885175	0.982797	0	0	0.461665	0.0563093	NEAT1
systemic lupus erythematosus DOID-9074 human GSE13887 sample 450	1/243	0.886204	0.982797	0	0	0.459734	0.0555398	RNF220
Hypertension C0020538 rat GSE2739 sample 209	2/418	0.887409	0.982797	0	0	0.533159	0.0636858	SLC1A3;ADCY2
Type 2 diabetes mellitus C0011860 mouse GSE2899 sample 299	1/245	0.888234	0.982797	0	0	0.455919	0.0540358	PPP2R2B
Barrett's esophagus DOID-9206 human GSE13083 sample 917	1/246	0.889235	0.982797	0	0	0.454035	0.0533009	PDZD2
Carcinoma, Hepatocellular C0019204 human GSE3632 sample 125	1/247	0.890227	0.982797	0	0	0.452166	0.0525772	FBXL7
pancreatic invasive intraductal papillary-mucinous carcinoma DOID-8150 human GSE19650 sample 610	1/248	0.891211	0.982797	0	0	0.450313	0.0518644	TCF4
Type 1 diabetes mellitus C0011854 mouse GSE1659 sample 346	1/248	0.891211	0.982797	0	0	0.450313	0.0518644	ZBTB20
acute myocardial infarction DOID-9408 mouse GSE775 sample 1002	1/248	0.891211	0.982797	0	0	0.450313	0.0518644	CACNA1C
Erectile dysfunction associated with type 2 diabetes mellitus C1997651 rat GSE2457 sample 186	1/249	0.892186	0.982797	0	0	0.448474	0.0511623	MEF2C
Malignant Melanoma C0025202 human GSE3189 sample 117	1/250	0.893152	0.982797	0	0	0.44665	0.0504708	AUTS2
psoriatic arthritis DOID-9008 human GSE61281 sample 696	1/251	0.89411	0.982797	0	0	0.444841	0.0497897	GRIK1
non-systemic juvenile idiopathic arthritis (sJIA) (subgroup-oligoarticular) DOID-848 human GSE21521 sample 577	1/252	0.895059	0.982797	0	0	0.443046	0.0491188	ANK3
ulcerative colitis DOID-8577 human GSE11223 sample 586	1/252	0.895059	0.982797	0	0	0.443046	0.0491188	LUZP2
ulcerative colitis DOID-8577 human GSE11223 sample 589	1/252	0.895059	0.982797	0	0	0.443046	0.0491188	LUZP2
colitis DOID-0060180 mouse GSE34874 sample 800	1/255	0.897855	0.982797	0	0	0.437746	0.0471656	DAB1
ALS (Amyotrophic Lateral Sclerosis) C0002736 human GSE833 sample 283	1/255	0.897855	0.982797	0	0	0.437746	0.0471656	FYN
ulcerative colitis DOID-8577 human GSE11223 sample 585	1/255	0.897855	0.982797	0	0	0.437746	0.0471656	XKR4
cystic fibrosis DOID-1485 mouse GSE3100 sample 1057	1/256	0.898771	0.982797	0	0	0.436007	0.0465338	PHACTR1
amyotrophic lateral sclerosis DOID-332 human GSE833 sample 1006	1/259	0.901469	0.982797	0	0	0.430871	0.0446941	FYN
atherosclerosis DOID-1936 mouse GSE19286 sample 906	1/259	0.901469	0.982797	0	0	0.430871	0.0446941	MALAT1
HIV - Human immunodeficiency virus infection C0019693 human GSE6740 sample 419	1/260	0.902353	0.982797	0	0	0.429186	0.0440988	PDE4B
psoriasis DOID-8893 human GSE32407 sample 836	1/263	0.904956	0.982797	0	0	0.424206	0.0423651	GPM6A
inflammatory bowel disease DOID-0050589 human GSE4183 sample 551	1/263	0.904956	0.982797	0	0	0.424206	0.0423651	MALAT1
ulcerative colitis DOID-8577 human GSE22619 sample 710	1/264	0.905808	0.982797	0	0	0.422572	0.0418041	KHDRBS3
Myocardial Infarction C0027051 rat GSE4105 sample 437	1/264	0.905808	0.982797	0	0	0.422572	0.0418041	MSI2
breast cancer DOID-1612 human GSE3744 sample 978	2/443	0.905938	0.982797	0	0	0.502287	0.0496182	TENM2;MAML2
cervical cancer DOID-4362 human GSE9750 sample 619	1/265	0.906653	0.982797	0	0	0.42095	0.0412512	AUTS2
Dengue Fever DOID-12206 human GSE51808 sample 447	1/266	0.90749	0.982797	0	0	0.41934	0.0407064	PTPRN2
pancreatic cancer DOID-1793 mouse GSE47811 sample 449	1/266	0.90749	0.982797	0	0	0.41934	0.0407064	NEGR1
Duchenne muscular dystrophy (DMD) C0013264 mouse GSE1008 sample 298	1/267	0.90832	0.982797	0	0	0.417742	0.0401695	DMD
Breast Cancer C0006142 human GSE3744 sample 24	2/449	0.909942	0.982797	0	0	0.495391	0.0467521	TENM2;PDE4B
systemic lupus erythematosus DOID-9074 mouse GSE2376 sample 633	1/269	0.909957	0.982797	0	0	0.414582	0.039119	MALAT1
Cardiomyopathy C0878544 human GSE1869 sample 79	1/270	0.910765	0.982797	0	0	0.41302	0.0386052	NEAT1
Duchenne muscular dystrophy (DMD) C0013264 mouse GSE1472 sample 410	1/271	0.911565	0.982797	0	0	0.411469	0.0380987	ADCY2
Wolfram Syndrome 10632 mouse GSE33372 sample 457	1/273	0.913145	0.982797	0	0	0.408402	0.0371076	THSD7A
Synovial sarcoma C0039101 mouse GSE6461 sample 22	1/273	0.913145	0.982797	0	0	0.408402	0.0371076	MEF2C
Carcinoma in situ of large intestine C0686087 human GSE4183 sample 190	1/273	0.913145	0.982797	0	0	0.408402	0.0371076	MALAT1
autism spectrum disorder DOID-0060041 human GSE25507 sample 1023	1/273	0.913145	0.982797	0	0	0.408402	0.0371076	NEAT1
colon adenoma DOID-0050912 human GSE4183 sample 550	1/274	0.913924	0.982797	0	0	0.406885	0.0366227	MALAT1
Polycystic Ovary Syndrome C0032460 human GSE5090 sample 308	1/275	0.914697	0.982797	0	0	0.405379	0.0361447	NEAT1
Cystic Fibrosis C0010674 mouse GSE769 sample 428	1/275	0.914697	0.982797	0	0	0.405379	0.0361447	MAN2A1
Duchenne muscular dystrophy (DMD) C0013264 mouse GSE1025 sample 144	1/276	0.915462	0.982797	0	0	0.403884	0.0356736	ADCY2
Teratospermia UMLS CUI-C0919628 human GSE6968 sample 954	1/276	0.915462	0.982797	0	0	0.403884	0.0356736	OXR1
Osteoporosis C0029456 human GSE2208 sample 163	1/277	0.916221	0.982797	0	0	0.4024	0.0352092	PARD3
Idiopathic fibrosing alveolitis C0085786 human GSE21369 sample 321	1/277	0.916221	0.982797	0	0	0.4024	0.0352092	PDE4B
systemic juvenile idiopathic arthritis (sJIA) (enthesitis-related) DOID-848 human GSE21521 sample 575	1/278	0.916973	0.982797	0	0	0.400927	0.0347515	ATP8A2
diabetic retinopathy DOID-8947 mouse GSE12610 sample 911	1/278	0.916973	0.982797	0	0	0.400927	0.0347515	MAP2
esophagus adenocarcinoma DOID-4914 human GSE1420 sample 644	1/278	0.916973	0.982797	0	0	0.400927	0.0347515	GPM6A
asthma DOID-2841 human GSE27011 sample 566	1/278	0.916973	0.982797	0	0	0.400927	0.0347515	DOCK4
Polymyositis C0085655 human GSE3112 sample 227	1/279	0.917718	0.982797	0	0	0.399465	0.0343002	SORBS1
Dermatomyositis C0011633 human GSE5370 sample 334	1/280	0.918456	0.982797	0	0	0.398012	0.0338554	MEF2C
autistic disorder DOID-12849 human GSE6575 sample 1045	1/280	0.918456	0.982797	0	0	0.398012	0.0338554	PCDH9
pancreatic non-invasive intraductal papillary-mucinous carcinoma DOID-7685 human GSE19650 sample 609	1/280	0.918456	0.982797	0	0	0.398012	0.0338554	TCF4
Ventricular hypertrophy C0340279 mouse GSE4678 sample 313	1/280	0.918456	0.982797	0	0	0.398012	0.0338554	RBFOX1
Diabetes and Obesity DOID-9970 mouse GSE54917 sample 807	1/282	0.919913	0.982797	0	0	0.395139	0.0329845	CTNNA3
endometrial cancer DOID-1380 human GSE17025 sample 838	1/282	0.919913	0.982797	0	0	0.395139	0.0329845	MALAT1
Adenocarcinoma of esophagus C0279628 human GSE1420 sample 164	1/282	0.919913	0.982797	0	0	0.395139	0.0329845	GPM6A
Kidney disorder associated with type 2 diabetes mellitus C1720457 mouse GSE2557 sample 8	1/282	0.919913	0.982797	0	0	0.395139	0.0329845	NEAT1
Hypertension C0020538 mouse GSE1674 sample 400	1/282	0.919913	0.982797	0	0	0.395139	0.0329845	MACF1
Infection by Yersinia enterocolitica C0238528 mouse GSE2973 sample 127	1/284	0.921345	0.982797	0	0	0.392306	0.0321381	NEAT1
myotonic dystrophy type 1 DOID-11722 human GSE7177 sample 1053	1/284	0.921345	0.982797	0	0	0.392306	0.0321381	DLC1
pancreatic intraductal papillary-mucinous adenoma DOID-7851 human GSE19650 sample 608	1/284	0.921345	0.982797	0	0	0.392306	0.0321381	TCF4
autism spectrum disorder DOID-0060041 human GSE25507 sample 1031	1/285	0.922051	0.982797	0	0	0.390905	0.0317238	NEAT1
familial hypercholesterolemia DOID-13810 human GSE6054 sample 909	1/285	0.922051	0.982797	0	0	0.390905	0.0317238	PIP4K2A
Duchenne muscular dystrophy (DMD) C0013264 mouse GSE1026 sample 72	1/287	0.923444	0.982797	0	0	0.388132	0.0309127	ADCY2
cystic fibrosis DOID-1485 mouse GSE769 sample 1058	1/288	0.924132	0.982797	0	0	0.38676	0.0305156	MAN2A1
Transplanted Heart Complication C0340529 mouse GSE582 sample 373	1/292	0.92682	0.982797	0	0	0.381365	0.0289821	RYR2
acute myocardial infarction DOID-9408 mouse GSE775 sample 1001	1/292	0.92682	0.982797	0	0	0.381365	0.0289821	SORBS1
asthma DOID-2841 human GSE31773 sample 715	1/292	0.92682	0.982797	0	0	0.381365	0.0289821	KHDRBS3
Osteolysis C0029435 human GSE755 sample 128	1/293	0.927477	0.982797	0	0	0.38004	0.028612	PDE4B
large cell neuroendocrine carcinoma DOID-0050872 human GSE51852 sample 733	1/294	0.928129	0.982797	0	0	0.378723	0.028247	ROBO2
bronchopulmonary dysplasia UMLS CUI-C0006287 human GSE8586 sample 919	1/295	0.928774	0.982797	0	0	0.377416	0.027887	MALAT1
endometrial cancer DOID-1380 human GSE17025 sample 842	1/295	0.928774	0.982797	0	0	0.377416	0.027887	MALAT1
schizophrenia DOID-5419 human GSE27383 sample 549	1/296	0.929414	0.982797	0	0	0.376117	0.0275321	FMNL2
colon cancer DOID-219 human GSE34299 sample 502	1/296	0.929414	0.982797	0	0	0.376117	0.0275321	KHDRBS3
Alzheimer's disease DOID-10652 human GSE36980 sample 522	1/299	0.931299	0.982797	0	0	0.372273	0.0264964	GRIN2B
acute myocardial infarction DOID-9408 mouse GSE775 sample 1004	1/299	0.931299	0.982797	0	0	0.372273	0.0264964	RYR2
familial hypercholesterolemia DOID-13810 human GSE6054 sample 910	1/300	0.931917	0.982797	0	0	0.371009	0.0261606	NEAT1
Breast Cancer C0006142 mouse GSE2528 sample 28	1/301	0.932528	0.982797	0	0	0.369754	0.0258295	SORBS1
endometrial cancer DOID-1380 human GSE17025 sample 840	1/302	0.933134	0.982797	0	0	0.368506	0.0255028	MALAT1
hepatitis C DOID-1883 human GSE20948 sample 598	1/302	0.933134	0.982797	0	0	0.368506	0.0255028	MAP4K4
asthma DOID-2841 human GSE16032 sample 729	1/303	0.933735	0.982797	0	0	0.367267	0.0251807	NEAT1
ductal carcinoma in situ DOID-0060074 human GSE21422 sample 605	1/303	0.933735	0.982797	0	0	0.367267	0.0251807	SORBS1
invasive ductal carcinoma DOID-3008 human GSE21422 sample 606	1/304	0.934331	0.982797	0	0	0.366037	0.024863	SORBS1
type 2 diabetes mellitus DOID-9352 mouse GSE54917 sample 614	1/304	0.934331	0.982797	0	0	0.366037	0.024863	CTNNA3
Asthma, allergic C0155877 mouse GSE3184 sample 436	1/304	0.934331	0.982797	0	0	0.366037	0.024863	NEAT1
schizophrenia DOID-5419 human GSE12679 sample 542	1/304	0.934331	0.982797	0	0	0.366037	0.024863	TENM2
hepatitis C DOID-1883 human GSE20948 sample 599	1/305	0.934921	0.982797	0	0	0.364814	0.0245496	MAP4K4
morbid obesity DOID-11981 human GSE48964 sample 583	1/306	0.935506	0.982797	0	0	0.363599	0.0242404	SLC1A3
bipolar disorder DOID-3312 human GSE62191 sample 546	1/306	0.935506	0.982797	0	0	0.363599	0.0242404	THSD7A
asthma DOID-2841 human GSE27011 sample 568	1/307	0.936085	0.982797	0	0	0.362392	0.0239355	NFIA
cerebral palsy DOID-1969 human GSE11686 sample 913	1/308	0.93666	0.982797	0	0	0.361193	0.0236347	PDE4B
Nicotine addiction C0028043 human GSE11208 sample 325	2/497	0.9367	0.982797	0	0	0.446245	0.029181	NBEA;TCF4
Leber congenital amaurosis C0339527 mouse GSE3249 sample 213	1/309	0.937229	0.982797	0	0	0.360002	0.0233381	MEF2C
Hypoxia C0242184 mouse GSE2271 sample 446	1/310	0.937793	0.982797	0	0	0.358819	0.0230454	SLC44A1
COPD - Chronic obstructive pulmonary disease C0024117 human GSE475 sample 343	1/311	0.938352	0.982797	0	0	0.357643	0.0227567	RYR3
endometrial cancer DOID-1380 human GSE17025 sample 839	1/311	0.938352	0.982797	0	0	0.357643	0.0227567	TCF4
Eczema DOID-3310 human GSE32924 sample 509	1/312	0.938907	0.982797	0	0	0.356475	0.0224719	MALAT1
bipolar disorder DOID-3312 human GSE46449 sample 570	1/312	0.938907	0.982797	0	0	0.356475	0.0224719	FAM19A2
invasive lobular carcinoma DOID-3457 human GSE5764 sample 625	1/313	0.939456	0.982797	0	0	0.355314	0.0221909	DST
Hypertrophy, Left Ventricular C0149721 rat GSE2116 sample 248	1/313	0.939456	0.982797	0	0	0.355314	0.0221909	TCF4
psoriasis DOID-8893 human GSE26952 sample 982	1/315	0.94054	0.982797	0	0	0.353015	0.0216403	CADM1
prostate cancer DOID-10283 human GSE3325 sample 991	1/315	0.94054	0.982797	0	0	0.353015	0.0216403	SORBS1
Bacterial Infection C0004623 human GSE4748 sample 414	1/316	0.941074	0.982797	0	0	0.351876	0.0213706	MALAT1
mytonic dystrophy Type 1 DOID-11722 human GSE7179 sample 1049	1/317	0.941604	0.982797	0	0	0.350744	0.0211044	MALAT1
Leukemia, Acute Megakaryocytic C0023462 mouse GSE2433 sample 95	1/318	0.942129	0.982797	0	0	0.34962	0.0208418	MEF2C
endometriosis DOID-289 human GSE6364 sample 945	1/318	0.942129	0.982797	0	0	0.34962	0.0208418	MALAT1
multiple myeloma DOID-9538 human GSE47552 sample 561	1/318	0.942129	0.982797	0	0	0.34962	0.0208418	PIP4K2A
atopic dermatitis DOID-3310 human GSE26952 sample 981	1/319	0.94265	0.982797	0	0	0.348503	0.0205828	AUTS2
psoriasis DOID-8893 mouse GSE27628 sample 823	1/319	0.94265	0.982797	0	0	0.348503	0.0205828	MEF2C
basal cell carcinoma DOID-2513 mouse GSE58894 sample 730	1/320	0.943165	0.982797	0	0	0.347392	0.0203272	RBFOX1
Dry eye syndrome C0013238 rat GSE844 sample 228	1/320	0.943165	0.982797	0	0	0.347392	0.0203272	ADCY2
familial combined hyperlipidemia DOID-13809 human GSE11393 sample 773	1/321	0.943677	0.982797	0	0	0.346289	0.020075	PHACTR1
endometrial cancer DOID-1380 human GSE17025 sample 849	1/322	0.944183	0.982797	0	0	0.345193	0.0198262	TCF4
Muscular Dystrophy C0026850 mouse GSE2507 sample 405	1/322	0.944183	0.982797	0	0	0.345193	0.0198262	ADCY2
cystic fibrosis DOID-1485 mouse GSE33319 sample 1048	1/324	0.945183	0.982797	0	0	0.34302	0.0193384	SYT1
Breast Cancer C0006142 human GSE2429 sample 148	1/324	0.945183	0.982797	0	0	0.34302	0.0193384	AUTS2
Familial hypophosphataemic rickets C0733682 mouse GSE868 sample 172	1/324	0.945183	0.982797	0	0	0.34302	0.0193384	ANK3
NASH C0400966 human GSE24807 sample 185	1/325	0.945676	0.982797	0	0	0.341944	0.0190994	MACF1
Spinal Cord Injury C0037929 rat GSE16710 sample 427	1/326	0.946165	0.982797	0	0	0.340874	0.0188636	LRRC4C
systemic lupus erythematosus DOID-9074 human GSE55447 sample 1079	1/327	0.946649	0.982797	0	0	0.339811	0.0186308	AUTS2
asthma DOID-2841 human GSE31773 sample 714	1/328	0.947129	0.982797	0	0	0.338755	0.0184012	KHDRBS3
ulcerative colitis DOID-8577 human GSE3365 sample 762	1/329	0.947605	0.982797	0	0	0.337704	0.0181746	PDE4B
esophagus squamous cell carcinoma DOID-3748 human GSE20347 sample 607	1/329	0.947605	0.982797	0	0	0.337704	0.0181746	PDZD2
Primary pulmonary hypoplasia C0456891 mouse GSE1363 sample 20	1/330	0.948076	0.982797	0	0	0.336661	0.017951	PPP2R2B
Nephrolithiasis C0392525 mouse GSE10162 sample 187	1/330	0.948076	0.982797	0	0	0.336661	0.017951	MALAT1
atopic dermatitis DOID-3310 human GSE32924 sample 857	1/330	0.948076	0.982797	0	0	0.336661	0.017951	MALAT1
Uterine leiomyoma C0042133 human GSE593 sample 16	1/330	0.948076	0.982797	0	0	0.336661	0.017951	NEAT1
colorectal adenocarcinoma DOID-0050861 mouse GSE31106 sample 1070	1/330	0.948076	0.982797	0	0	0.336661	0.017951	NEAT1
endometrial cancer DOID-1380 human GSE17025 sample 844	1/331	0.948543	0.982797	0	0	0.335623	0.0177303	TCF4
mental retardation DOID-1059 human GSE6575 sample 1047	1/333	0.949465	0.982797	0	0	0.333567	0.0172976	PTPRN2
Colitis C0009319 mouse GSE2172 sample 401	1/334	0.94992	0.982797	0	0	0.332548	0.0170856	SLC44A1
APECED - Autoimmune polyendocrinopathy-candidiasis-ectodermal dystrophy C0085859 mouse GSE85 sample 6	1/334	0.94992	0.982797	0	0	0.332548	0.0170856	SLC44A1
Leukemia, Adult T Cell C0023493 human GSE10789 sample 351	1/335	0.950371	0.982797	0	0	0.331536	0.0168763	PCDH15
colorectal cancer DOID-9256 human GSE32323 sample 552	1/336	0.950817	0.982797	0	0	0.330529	0.0166697	DPP10
MS (Multiple Sclerosis) C0026769 human GSE10064 sample 377	1/336	0.950817	0.982797	0	0	0.330529	0.0166697	FYN
diffuse large B-cell lymphoma DOID-0050745 mouse GSE6136 sample 688	1/337	0.95126	0.982797	0	0	0.329529	0.0164658	MEF2C
schizophrenia DOID-5419 human GSE62191 sample 545	1/337	0.95126	0.982797	0	0	0.329529	0.0164658	DAB1
Huntington's disease DOID-12858 mouse GSE3248 sample 723	1/337	0.95126	0.982797	0	0	0.329529	0.0164658	MACF1
myotonic dystrophy type 1 DOID-11722 human GSE7177 sample 1054	1/337	0.95126	0.982797	0	0	0.329529	0.0164658	DLC1
Macular degeneration C0024437 human GSE1719 sample 46	1/337	0.95126	0.982797	0	0	0.329529	0.0164658	MACF1
amyotrophic lateral sclerosis DOID-332 mouse GSE10953 sample 681	1/337	0.95126	0.982797	0	0	0.329529	0.0164658	RIMS2
multiple myeloma DOID-9538 human GSE36474 sample 707	1/338	0.951699	0.982797	0	0	0.328534	0.0162647	TENM2
Uterine leiomyoma C0042133 human GSE2724 sample 225	1/338	0.951699	0.982797	0	0	0.328534	0.0162647	TCF4
adrenoleukodystrophy DOID-10588 human GSE34309 sample 864	1/338	0.951699	0.982797	0	0	0.328534	0.0162647	FAM155A
acute myocardial infarction DOID-9408 human GSE48060 sample 510	1/339	0.952133	0.982797	0	0	0.327545	0.0160661	FMNL2
MS (Multiple Sclerosis) C0026769 mouse GSE842 sample 381	1/340	0.952564	0.982797	0	0	0.326562	0.0158701	PPP2R2B
Treacher Collins syndrome DOID-2908 mouse GSE10167 sample 480	1/342	0.953415	0.982797	0	0	0.324613	0.0154858	CADM1
pulmonary sarcoidosis DOID-13406 human GSE19976 sample 765	1/342	0.953415	0.982797	0	0	0.324613	0.0154858	SLC1A3
allergic contact dermatitis DOID-3042 human GSE6281 sample 927	1/345	0.954662	0.982797	0	0	0.321733	0.0149278	RYR3
Autism DOID-0060041 human GSE25507 sample 464	1/345	0.954662	0.982797	0	0	0.321733	0.0149278	NEAT1
Lung Injury C0273115 human GSE1541 sample 67	1/346	0.95507	0.982797	0	0	0.320784	0.0147466	MACF1
Aplastic anaemia C0002874 human GSE3807 sample 424	1/346	0.95507	0.982797	0	0	0.320784	0.0147466	PDE4B
Emery-Dreifuss muscular dystrophy DOID-11726 mouse GSE6399 sample 675	1/347	0.955475	0.982797	0	0	0.31984	0.0145678	RYR2
ulcerative colitis DOID-8577 human GSE38713 sample 810	1/350	0.956667	0.982797	0	0	0.317042	0.014045	DPP10
Niemann-Pick Type C DOID-14504 mouse GSE39621 sample 495	1/357	0.959327	0.982797	0	0	0.310697	0.0129013	MALAT1
autism spectrum disorder DOID-0060041 human GSE25507 sample 1025	1/357	0.959327	0.982797	0	0	0.310697	0.0129013	NEAT1
Fibrosis of lung (disorder) DOID-3770 mouse GSE43695 sample 631	1/358	0.959693	0.982797	0	0	0.30981	0.0127461	TNR
Breast cancer DOID-1612 mouse GSE24594 sample 616	1/358	0.959693	0.982797	0	0	0.30981	0.0127461	NEAT1
Rift Valley fever DOID-1328 mouse GSE18064 sample 876	1/360	0.960416	0.982797	0	0	0.308053	0.0124418	NEAT1
Cancer of Colon C0007102 human GSE4107 sample 245	1/362	0.961127	0.982797	0	0	0.306315	0.0121451	MALAT1
Rift Valley fever DOID-1328 mouse GSE18064 sample 875	1/363	0.961477	0.982797	0	0	0.305453	0.0119996	FRMD4A
bronchopulmonary dysplasia UMLS CUI-C0006287 human GSE8586 sample 918	1/364	0.961824	0.982797	0	0	0.304596	0.011856	MACF1
diffuse large B-cell lymphoma DOID-0050745 mouse GSE6136 sample 687	1/366	0.962509	0.982797	0	0	0.302895	0.0115741	MEF2C
allergic contact dermatitis DOID-3042 human GSE6281 sample 926	1/368	0.963182	0.982797	0	0	0.301214	0.0112994	MCTP1
Nutritional deficiency, NEC C0267975 mouse GSE1776 sample 422	1/370	0.963843	0.982797	0	0	0.29955	0.0110315	MEF2C
Type 1 diabetes mellitus C0011854 mouse GSE1623 sample 53	1/371	0.964169	0.982797	0	0	0.298725	0.0109001	ZBTB20
Teratospermia UMLS CUI-C0919628 human GSE6872 sample 953	1/372	0.964492	0.982797	0	0	0.297905	0.0107704	MALAT1
nasopharynx carcinoma DOID-9261 human GSE12452 sample 775	1/373	0.964812	0.982797	0	0	0.297089	0.0106423	NBEA
Idiopathic fibrosing alveolitis C0085786 human GSE10921 sample 272	1/374	0.96513	0.982797	0	0	0.296277	0.0105158	NEAT1
Huntington's disease DOID-12858 human GSE24250 sample 466	1/379	0.966674	0.982797	0	0	0.292283	0.00990666	PIP4K2A
melanoma DOID-1909 human GSE6887 sample 951	1/379	0.966674	0.982797	0	0	0.292283	0.00990666	DOCK4
endometrial cancer DOID-1380 human GSE17025 sample 847	1/380	0.966975	0.982797	0	0	0.291497	0.00978938	TCF4
nasopharynx carcinoma DOID-9261 human GSE12452 sample 778	1/386	0.968722	0.982797	0	0	0.286865	0.00911578	MEF2C
asthma DOID-2841 human GSE18965 sample 753	1/389	0.969562	0.982797	0	0	0.284603	0.00879748	PHACTR1
esophagus squamous cell carcinoma DOID-3748 human GSE63941 sample 659	1/391	0.970108	0.982797	0	0	0.283115	0.0085918	MALAT1
nasopharynx carcinoma DOID-9261 human GSE12452 sample 776	1/392	0.970378	0.982797	0	0	0.282376	0.00849087	NBEA
Epilepsy C0014544 human GSE7486 sample 417	1/401	0.9727	0.982797	0	0	0.275895	0.00763666	MACROD2
papillary thyroid carcinoma DOID-3969 human GSE54958 sample 652	1/402	0.972946	0.982797	0	0	0.275193	0.00754749	LRRTM4
melanoma in situ UMLS CUI-C0346040 human GSE4587 sample 980	1/404	0.973433	0.982797	0	0	0.273799	0.0073724	NEAT1
Severe acute respiratory syndrome (SARS) C1175175 human GSE1739 sample 165	1/405	0.973673	0.982797	0	0	0.273107	0.00728646	MACF1
esophagus squamous cell carcinoma DOID-3748 human GSE63941 sample 658	1/408	0.97438	0.982797	0	0	0.271052	0.0070349	MALAT1
glaucoma associated with systemic syndromes DOID-1686 mouse GSE26299 sample 486	1/415	0.975957	0.982797	0	0	0.266373	0.00648268	CNTN5
ulcerative colitis DOID-8577 human GSE37283 sample 594	1/429	0.978827	0.982797	0	0	0.257474	0.00550999	NEAT1
nasopharynx carcinoma DOID-9261 human GSE12452 sample 777	1/433	0.979583	0.982797	0	0	0.255037	0.00526105	NBEA
facioscapulohumeral muscular dystrophy DOID-11727 human GSE15090 sample 541	1/438	0.98049	0.982797	0	0	0.252054	0.00496627	MEF2C
COPD - Chronic obstructive pulmonary disease C0024117 human GSE3320 sample 255	1/442	0.981186	0.982797	0	0	0.249717	0.00474287	RYR3
multiple sclerosis DOID-2377 human GSE16461 sample 584	1/452	0.982821	0.982821	0	0	0.244054	0.00422895	PDE4B

## Sheet: Disease Perturbations from GEO up
Term	Overlap	P-value	Adjusted P-value	Old P-value	Old Adjusted P-value	Odds Ratio	Combined Score	Genes
Spinal Muscular Atrophy C0026847 mouse GSE10599 sample 235	42/368	1.27233e-34	6.88331e-32	0	0	18.6065	1452.19	GRIA1;DPP10;GRIA2;CNTNAP2;ATP8A2;MYT1L;LUZP2;CTNND2;NTM;NRXN1;SLC1A2;ADCY2;GRIK2;RIMS2;FSTL5;DPP6;TNR;DLGAP1;CTNNA2;LRRC4C;RGS7;CALN1;OPCML;GRID2;PTPRN2;DSCAM;SYT1;CADM2;CADPS;KCNIP4;SLC4A10;LSAMP;GABRG3;GRIN2B;LRP1B;RALYL;DLG2;PPP2R2B;CNTN4;MDGA2;FGF12;HCN1
multiple sclerosis DOID-2377 human GSE38010 sample 737	17/310	2.48552e-09	6.72334e-07	0	0	7.08212	140.317	GPM6A;GRIA2;MEF2C;RBFOX1;KHDRBS3;SYT1;NRXN1;PCDH7;SLC1A2;SLC1A3;RALYL;GRM5;MAP2;KCNQ5;TCF4;ERC2;PLCB1
schizophrenia DOID-5419 human GSE25673 sample 892	15/263	1.33183e-08	2.40174e-06	0	0	7.30847	132.533	GRIA1;CHRM3;GRIA2;TENM2;PTPRN2;PCDH9;NEBL;ZNF804A;ADCY2;FSTL5;FGF14;MAP2;THSD7A;RGS6;GRIA4
multiple sclerosis DOID-2377 human GSE38010 sample 738	13/309	3.94716e-06	0.000533853	0	0	5.2293	65.0656	GPM6A;GRIA2;MEF2C;RBFOX1;SYT1;NRXN1;PCDH7;SLC1A2;SLC1A3;RALYL;MAP2;KCNQ5;TCF4
schizophrenia DOID-5419 human GSE25673 sample 891	13/326	7.04787e-06	0.000762579	0	0	4.94097	58.6137	KHDRBS2;ATP8A2;MYT1L;PDE4D;MIR99AHG;KCNIP4;ANK3;RIMS2;FSTL5;FGF14;LRRTM4;LRRC7;THSD7A
Schizophrenia C0036341 human GSE12649 sample 261	13/358	1.90529e-05	0.00171794	0	0	4.47533	48.6392	GPM6A;GRIA2;MEF2C;RBFOX1;SYT1;PCDH9;SLC1A3;ANK3;DPP6;RALYL;PDZD2;PIP4K2A;ERC2
schizophrenia DOID-5419 human GSE12679 sample 542	11/296	6.87543e-05	0.00531373	0	0	4.54276	43.5422	DPP10;FSTL5;MEF2C;RBFOX1;PDZD2;SYT1;PCDH9;LHFPL3;XKR4;ERC2;LRP1B
Lewy body dementia DOID-12217 human GSE49036 sample 1067	12/358	8.6348e-05	0.00583928	0	0	4.09396	38.3077	PTPRD;CHRM3;RYR2;RBFOX1;FGF14;MCTP1;MAN2A1;PIP4K2A;MALAT1;KCNQ5;UNC5D;NEAT1
polycystic ovary syndrome DOID-11612 human GSE48301 sample 560	11/325	0.000156844	0.00942808	0	0	4.11709	36.0667	KHDRBS2;GRID2;KHDRBS3;LRRTM4;LSAMP;ZBTB20;PRKCA;TRPM3;LRP1B;GRIA4;HCN1
Parkinson's disease DOID-14330 human GSE7621 sample 941	11/342	0.000243617	0.0131797	0	0	3.90223	32.4662	GPM6A;GRIA2;PCDH9;NEBL;NTM;SLC1A2;ZBTB20;SLC1A3;ADCY2;SORBS1;RYR3
prolactinoma DOID-5394 human GSE36314 sample 636	7/160	0.000565532	0.0278139	0	0	5.29373	39.5852	DOCK4;PDZD2;SYT1;PDE4B;THSD7A;GRIK2;PLCB1
schizophrenia DOID-5419 human GSE12679 sample 767	9/285	0.00101657	0.0432959	0	0	3.79406	26.1461	FSTL5;MEF2C;RBFOX1;SYT1;PCDH9;LHFPL3;XKR4;ERC2;LRP1B
oligodendroglioma DOID-3181 human GSE15824 sample 858	9/287	0.00106747	0.0432959	0	0	3.76638	25.7713	GPM6A;GRIA2;KHDRBS3;MAML2;MAP2;ZBTB20;SLC1A3;TCF4;LHFPL3
schizophrenia DOID-5419 human GSE62105 sample 547	9/289	0.00112041	0.0432959	0	0	3.73909	25.4036	MCTP1;MAP2;LUZP2;KCNIP4;GLIS3;GPC5;THSD7A;XKR4;GABRG3
astrocytoma DOID-3069 human GSE15824 sample 860	9/299	0.00141797	0.0511414	0	0	3.60831	23.6652	GPM6A;DPP6;KHDRBS3;MAML2;MAP2;PARD3;SLC1A3;TCF4;LHFPL3
Senescence C0001792 rat GSE3531 sample 167	9/308	0.00173738	0.0563947	0	0	3.49809	22.2317	GRIA1;KCND2;MAP2;NTM;NRXN3;LSAMP;SLC1A3;TCF4;FYN
schizophrenia DOID-5419 human GSE21935 sample 855	8/250	0.00177211	0.0563947	0	0	3.83021	24.2666	GPM6A;MEF2C;TENM2;SYT1;MAP2;FAM19A2;MALAT1;ERC2
Oligodendroglioma C0028945 human GSE4290 sample 251	8/257	0.00210495	0.0613967	0	0	3.7212	22.9355	DTNA;MAP2;SLC1A2;ZBTB20;SLC1A3;MALAT1;TCF4;LHFPL3
pulmonary sarcoidosis DOID-13406 human GSE19976 sample 765	8/258	0.00215626	0.0613967	0	0	3.70613	22.7533	CHRM3;GPM6A;KHDRBS2;NBEA;DST;NEGR1;DMD;SORBS1
Pauciarticular juvenile arthritis C0157917 human GSE1402 sample 430	9/330	0.00276439	0.0747767	0	0	3.25467	19.1731	GPM6A;CNTN5;DGKB;LUZP2;ATRNL1;CTNND2;CADPS;ERC2;RYR3
autism spectrum disorder DOID-0060041 human GSE28521 sample 1040	9/341	0.00343286	0.0884371	0	0	3.14506	17.8462	DTNA;DLG2;CADM1;LSAMP;PHACTR1;DMD;FYN;FBXL7;CALN1
oligodendroglioma DOID-3181 human GSE15824 sample 859	8/290	0.00438895	0.100982	0	0	3.2802	17.8071	GRIA2;KHDRBS3;MAML2;KCND2;MAP2;ZBTB20;TCF4;LHFPL3
Neurological pain disorder C0423704 rat GSE15041 sample 356	7/230	0.00447117	0.100982	0	0	3.6191	19.5797	RIMS2;GPM6A;NLGN1;SYT1;NEGR1;MAP2;MTUS2
Schizophrenia C0036341 human GSE4036 sample 357	8/291	0.00447979	0.100982	0	0	3.26845	17.6763	RBFOX1;RALYL;PCDH9;MAP2;ZBTB20;MALAT1;KCNAB1;ANK3
fragile X syndrome DOID-14261 human GSE7329 sample 515	8/299	0.00525965	0.111612	0	0	3.17729	16.6734	KIAA1217;RYR2;AUTS2;NRXN3;FYN;CTNNA2;XKR4;PITPNC1
idiopathic pulmonary fibrosis DOID-0050156 human GSE44723 sample 851	8/300	0.005364	0.111612	0	0	3.16625	16.5533	KIAA1217;SYT1;CADM1;KCND2;NEGR1;NTM;GRIK2;AFF3
schizophrenia DOID-5419 human GSE21935 sample 854	8/314	0.00699737	0.140207	0	0	3.01922	14.982	GPM6A;MACF1;SYT1;MAP2;SLC1A2;SLC1A3;MALAT1;TCF4
Schizophrenia DOID-1574 human GSE12679 sample 451	8/319	0.00766364	0.145812	0	0	2.96992	14.4673	FSTL5;RBFOX1;SLC1A3;GPC5;LHFPL3;NXPH1;CSMD3;PITPNC1
autism spectrum disorder DOID-0060041 human GSE7329 sample 1033	8/321	0.00794313	0.145812	0	0	2.95064	14.2677	AUTS2;NEGR1;ZNF804A;KAZN;FYN;CTNNA2;PITPNC1;RGS7
smoldering myeloma DOID-9551 human GSE47552 sample 562	8/322	0.00808572	0.145812	0	0	2.94109	14.1692	KHDRBS2;SYT1;CNTN5;NBEA;DST;NRG3;LSAMP;PTPRG
psoriasis DOID-8893 human GSE61281 sample 697	8/345	0.0119259	0.208126	0	0	2.73713	12.1229	RYR2;SYT1;NEGR1;SLC1A2;SLC4A10;UNC5D;LRRC4C;GRIA4
multiple myeloma DOID-9538 human GSE47552 sample 561	7/282	0.0129734	0.219332	0	0	2.92697	12.7173	KIAA1217;KHDRBS2;SYT1;CNTN5;NBEA;GLIS3;LSAMP
Depression 1596 human GSE12654 sample 462	7/291	0.0151785	0.248836	0	0	2.83291	11.8639	GPM6A;GRIA2;CNTNAP2;SYT1;ATRNL1;NRXN1;CTNNA2
polycystic ovary syndrome DOID-11612 human GSE10946 sample 826	7/294	0.0159696	0.254105	0	0	2.80287	11.5957	PCDH9;FAM19A2;MALAT1;FYN;ANK3;ERC2;RYR3
astrocytoma DOID-3069 human GSE15824 sample 861	7/301	0.0179286	0.276666	0	0	2.73515	10.999	DPP6;MAML2;NFIA;MAP2;SLC1A3;TCF4;LHFPL3
Parkinson's disease DOID-14330 human GSE7621 sample 940	6/235	0.0184103	0.276666	0	0	3.00222	11.9934	RBFOX1;PCDH9;MALAT1;LHFPL3;NEAT1;OPCML
large cell neuroendocrine carcinoma DOID-0050872 human GSE51852 sample 733	7/306	0.0194278	0.284066	0	0	2.68873	10.5964	RIMS2;DPP10;PTPRN2;SYT1;KCND2;ST18;STXBP5L
schizophrenia DOID-5419 human GSE17612 sample 853	7/309	0.0203684	0.289981	0	0	2.66161	10.3637	MEF2C;PCDH9;SLC1A2;PIP4K2A;MALAT1;RYR3;MAP4K4
Huntington's disease DOID-12858 mouse GSE19780 sample 528	7/328	0.0270727	0.375547	0	0	2.50163	9.02896	ROBO2;GRIP1;GRM5;DLG2;MAP2;PHACTR1;CALN1
Bipolar Disorder C0005586 human GSE5388 sample 107	6/259	0.0279908	0.378575	0	0	2.7141	9.70529	GPM6A;RBFOX1;RALYL;SLC1A2;SLC1A3;CTNNA2
Emery-Dreifuss muscular dystrophy, autosomal dominant form DOID-11726 mouse GSE8000 sample 676	7/335	0.0298824	0.390283	0	0	2.44736	8.59144	RYR2;MTUS2;MALAT1;CACNA1C;SORBS1;NEAT1;PITPNC1
autism spectrum disorder DOID-0060041 human GSE28521 sample 1039	7/336	0.0302992	0.390283	0	0	2.4398	8.53108	NTM;KCNIP4;LRRC4C;XKR4;GRIN2B;FGF12;FBXL7
Huntington's disease DOID-12858 mouse GSE9038 sample 717	6/288	0.0433631	0.521321	0	0	2.43138	7.63003	RALYL;DLG2;KCNC2;FAM19A2;MTUS2;UNC5D
Huntington's disease DOID-12858 mouse GSE3248 sample 728	6/288	0.0433631	0.521321	0	0	2.43138	7.63003	MACF1;GRID2;CADM1;CTNND2;ZBTB20;ANK3
idiopathic pulmonary fibrosis DOID-0050156 human GSE44723 sample 850	6/288	0.0433631	0.521321	0	0	2.43138	7.63003	MEF2C;SYT1;CADM1;KCNQ5;ZNF385D;AFF3
Waldenstrom Macroglobulinemia UMLS CUI-C0024419 human GSE6691 sample 784	6/293	0.0464586	0.542079	0	0	2.38841	7.33049	PDE4B;ZNF804A;ZBTB20;TCF4;NEAT1;PTPRG
morbid obesity DOID-11981 human GSE48964 sample 583	6/294	0.0470938	0.542079	0	0	2.38	7.27235	NRXN3;ZNF804A;KCNQ5;DMD;GRIK2;OPCML
bipolar disorder DOID-3312 human GSE12679 sample 770	7/380	0.0526784	0.593729	0	0	2.14714	6.32021	KHDRBS2;TENM2;PIP4K2A;SLC1A3;GPC5;UNC5D;NXPH1
facioscapulohumeral muscular dystrophy DOID-11727 human GSE15090 sample 541	4/162	0.0560375	0.6187	0	0	2.87773	8.29287	RBFOX1;MALAT1;NEAT1;LRP1B
asthma DOID-2841 human GSE27011 sample 565	7/392	0.0602113	0.651486	0	0	2.07893	5.84158	MACF1;FMNL2;AUTS2;PPP2R2B;PDE4D;ZBTB20;PLCB1
Neurofibromatosis DOID-8712 mouse GSE1482 sample 668	5/240	0.0625408	0.657526	0	0	2.42306	6.71656	MACF1;CTNND2;ZBTB20;TCF4;ANK3
autism spectrum disorder DOID-0060041 human GSE28521 sample 1041	6/317	0.0632002	0.657526	0	0	2.20139	6.07902	DTNA;DLG2;CADM1;DGKB;LRP1B;RYR3
diabetic retinopathy DOID-8947 mouse GSE12610 sample 911	6/322	0.0670838	0.680027	0	0	2.166	5.85213	RIMS2;GPM6A;KHDRBS3;CADM1;PRKCA;MALAT1
Lewy body dementia DOID-12217 human GSE49036 sample 1069	6/323	0.067877	0.680027	0	0	2.15906	5.80799	SLC44A1;MAN2A1;SLC1A2;PIP4K2A;TMTC2;ST18
non-systemic juvenile idiopathic arthritis (sJIA) (subgroup-oligoarticular) DOID-848 human GSE21521 sample 577	6/348	0.0894741	0.8801	0	0	1.99867	4.82439	GPM6A;KHDRBS2;PDE4B;PHACTR1;MACROD2;CTNNA2
CML - Chronic myeloid leukemia C0023473 human GSE4170 sample 4	7/441	0.0975483	0.92877	0	0	1.83956	4.28141	PTPRN2;MCTP1;PPP2R2B;SLC1A2;LHFPL3;TRPM3;QKI
autism spectrum disorder DOID-0060041 human GSE63524 sample 1035	5/275	0.0978556	0.92877	0	0	2.10519	4.89301	FSTL5;TENM2;DSCAM;PCDH9;TMTC2
West Nile fever DOID-2366 human GSE30719 sample 874	8/532	0.100936	0.939188	0	0	1.74344	3.99817	RYR2;MEF2C;PDZD2;MAP2;PDE4B;ZNF804A;SLC1A3;TCF4
Asthma DOID-2841 human GSE43696 sample 634	5/279	0.102425	0.939188	0	0	2.07403	4.72594	NLGN1;KCNAB1;GPC5;LHFPL3;GRIA4
neurofibromatosis DOID-8712 mouse GSE1482 sample 666	5/282	0.105921	0.955059	0	0	2.05126	4.60518	RYR2;CTNND2;CADPS;TCF4;ANK3
Neurofibromatosis DOID-8712 mouse GSE1482 sample 667	6/369	0.110194	0.961533	0	0	1.88101	4.14859	GRIA2;CTNND2;ZBTB20;TCF4;ANK3;RGS7
Huntington's disease DOID-12858 mouse GSE5786 sample 721	6/369	0.110194	0.961533	0	0	1.88101	4.14859	RBFOX1;SYT1;KAZN;MALAT1;PHACTR1;KCNAB1
Oligodendroglioma C0028945 human GSE2223 sample 116	5/289	0.114305	0.981575	0	0	1.99998	4.33772	GRIA2;ZBTB20;SLC1A3;MSI2;PTPRG
autism spectrum disorder DOID-0060041 human GSE7329 sample 1034	5/292	0.117994	0.990368	0	0	1.97877	4.22888	RYR2;ATRNL1;XKR4;PITPNC1;STXBP5L
asthma DOID-2841 human GSE27011 sample 568	5/293	0.119236	0.990368	0	0	1.9718	4.19333	MACF1;ARL15;PDE4D;FAM19A2;ZBTB20
Rett Syndrome C0035372 human GSE6955 sample 390	6/381	0.12305	0.990368	0	0	1.8197	3.81256	CNTNAP2;MEF2C;PTPRN2;AUTS2;CADM1;SLC1A3
amyotrophic lateral sclerosis DOID-332 mouse GSE3343 sample 685	3/138	0.123798	0.990368	0	0	2.51443	5.25291	MALAT1;ANK3;RASAL2
Gamma-hydroxybutyric acidaemia C0268631 mouse GSE2866 sample 409	6/384	0.126376	0.990368	0	0	1.80498	3.73359	GRIA1;MACF1;SYT1;CADM1;CTNND2;FYN
Granulomatous Disease, Chronic C0018203 human GSE935 sample 371	5/299	0.126816	0.990368	0	0	1.93096	3.98747	DOCK4;ATRNL1;PCDH7;CACNA1A;RASAL2
facioscapulohumeral muscular dystrophy DOID-11727 human GSE36398 sample 673	6/386	0.128617	0.990368	0	0	1.79529	3.68199	GRIA2;FMNL2;LRRC7;ATRNL1;CNTN4;KCTD16
endometrial cancer DOID-1380 human GSE17025 sample 847	4/220	0.131582	0.990368	0	0	2.0988	4.25663	TENM2;ERBB4;GLIS3;THSD7A
melanoma DOID-1909 human GSE6887 sample 950	5/307	0.13726	0.990368	0	0	1.87904	3.73155	MALAT1;GPC5;CSMD3;AFF3;CNTNAP5
Niemann-Pick disease Type C DOID-14504 mouse GSE39621 sample 469	5/310	0.141273	0.990368	0	0	1.86027	3.64067	GPM6A;NBEA;CTNND2;NTM;SLC1A2
prostate cancer DOID-10283 human GSE26910 sample 603	5/310	0.141273	0.990368	0	0	1.86027	3.64067	RIMS2;CNTNAP2;NTM;PCDH7;ZNF385D
fragile X syndrome DOID-14261 human GSE7329 sample 809	5/312	0.143976	0.990368	0	0	1.84797	3.58156	PTPRD;RYR2;ATRNL1;XKR4;STXBP5L
Huntington's disease DOID-12858 mouse GSE9038 sample 718	4/229	0.145884	0.990368	0	0	2.01392	3.8767	FSTL5;RALYL;DGKB;MAP2
glioblastoma UMLS CUI-C0017636 human GSE15824 sample 862	5/315	0.148073	0.990368	0	0	1.8298	3.49501	KHDRBS3;DTNA;MAP2;SLC1A3;OPCML
Atherosclerosis C0004153 mouse GSE1560 sample 77	6/403	0.148431	0.990368	0	0	1.71691	3.27524	GPM6A;GRIA2;FAM155A;NBEA;ERBB4;RYR3
bipolar disorder DOID-3312 human GSE12679 sample 544	5/324	0.160658	0.990368	0	0	1.77736	3.24986	PIP4K2A;SLC1A3;GPC5;UNC5D;NXPH1
Hypoxia C0242184 human GSE4483 sample 440	5/325	0.162082	0.990368	0	0	1.77171	3.2239	GPM6A;WBSCR17;SLC1A3;MALAT1;NEAT1
Gamma-hydroxybutyric acidaemia C0268631 mouse GSE2866 sample 311	5/327	0.164947	0.990368	0	0	1.76053	3.1727	GRIA1;SYT1;CTNND2;TCF4;SORBS1
Cardiomyopathy C0878544 human GSE1869 sample 79	5/330	0.169282	0.990368	0	0	1.74401	3.09769	RYR2;AUTS2;ZBTB20;TCF4;DMD
multiple sclerosis DOID-2377 human GSE23832 sample 746	5/337	0.179569	0.990368	0	0	1.70662	2.93061	SLC4A10;ZNF804A;SLC1A3;ANK3;SLC8A1
diabetes mellitus type 2 DOID-9352 human GSE12643 sample 766	4/254	0.188494	0.990368	0	0	1.81022	3.02069	KHDRBS3;DLC1;ZBTB20;DMD
psoriasis DOID-8893 mouse GSE27628 sample 822	5/346	0.19313	0.990368	0	0	1.66081	2.73103	RBFOX1;DTNA;DAB1;KCNQ5;OPCML
Breast Cancer C0006142 human GSE2155 sample 39	5/350	0.199272	0.990368	0	0	1.64122	2.64743	GRIA2;DST;GRIK1;FYN;MAP4K4
acute myocardial infarction DOID-9408 human GSE48060 sample 510	4/261	0.201085	0.990368	0	0	1.76028	2.82355	GPM6A;PCDH9;NEBL;MACROD2
Down syndrome DOID-14250 human GSE42956 sample 1060	5/353	0.203922	0.990368	0	0	1.62682	2.58667	ROBO2;NLGN1;SYT1;ZBTB20;ASTN2
melanoma DOID-1909 human GSE6887 sample 948	4/263	0.204728	0.990368	0	0	1.74651	2.7701	DOCK4;GRID2;CADM1;LRRC4C
Huntington's disease DOID-12858 mouse GSE3248 sample 727	5/354	0.20548	0.990368	0	0	1.62208	2.56678	SYT1;PPP2R2B;CTNND2;TCF4;ANK3
systemic lupus erythematosus DOID-9074 human GSE55447 sample 1077	4/271	0.219491	0.990368	0	0	1.69349	2.56808	SLC1A3;XKR4;OXR1;QKI
schizophrenia DOID-5419 human GSE12679 sample 769	3/185	0.225432	0.990368	0	0	1.86065	2.77187	FSTL5;ATRNL1;CSMD3
polycystic ovary syndrome DOID-11612 human GSE48301 sample 559	3/186	0.227759	0.990368	0	0	1.85039	2.73759	DAB1;NEBL;ATRNL1
Down syndrome DOID-14250 human GSE35561 sample 1062	5/371	0.23255	0.990368	0	0	1.54538	2.25417	RIMS2;LRRC7;MIR99AHG;TCF4;PITPNC1
Down Syndrome C0013080 human GSE10758 sample 310	5/376	0.240703	0.990368	0	0	1.52416	2.1707	NRG3;KCNIP4;LSAMP;SLC1A3;FRMD4A
glioblastoma UMLS CUI-C0017636 human GSE15824 sample 863	4/284	0.244056	0.990368	0	0	1.61379	2.27602	MACF1;MAML2;MALAT1;LHFPL3
schizophrenia DOID-5419 human GSE27383 sample 548	4/285	0.245972	0.990368	0	0	1.60796	2.25523	ARL15;NEBL;MALAT1;NEAT1
Alexander Disease C0270726 mouse GSE977 sample 87	4/286	0.247891	0.990368	0	0	1.60218	2.23467	MACF1;CTNND2;TCF4;SORBS1
Glaucoma C0017601 mouse GSE3554 sample 260	4/290	0.2556	0.990368	0	0	1.57945	2.15459	GRIA2;LUZP2;MALAT1;NEAT1
Cardiomyopathy C0878544 human GSE5406 sample 88	4/291	0.257535	0.990368	0	0	1.57387	2.1351	FGF14;AUTS2;NBEA;FGF12
adenosquamous cell lung carcinoma DOID-4829 human GSE51852 sample 731	4/292	0.259473	0.990368	0	0	1.56832	2.11582	GRIP1;FSTL5;TENM2;KCND2
autism spectrum disorder DOID-0060041 human GSE29691 sample 1038	4/293	0.261414	0.990368	0	0	1.56281	2.09675	MCTP1;PCDH9;MALAT1;PHACTR1
Down Syndrome C0013080 mouse GSE1611 sample 105	4/294	0.263358	0.990368	0	0	1.55735	2.07787	CADM1;CTNND2;CADPS;FYN
nasopharynx carcinoma DOID-9261 human GSE12452 sample 776	3/208	0.279894	0.990368	0	0	1.64996	2.10097	CNTNAP2;TENM2;XKR4
Acne C0702166 human GSE10432 sample 297	4/308	0.290837	0.990368	0	0	1.48456	1.83342	PHLPP1;CADM1;PCDH7;SLC1A3
nasopharynx carcinoma DOID-9261 human GSE12452 sample 778	3/214	0.294332	0.990368	0	0	1.60255	1.95999	MCTP1;CADPS;RYR3
ulcerative colitis DOID-8577 human GSE6731 sample 759	3/216	0.299157	0.990368	0	0	1.58734	1.91558	RYR2;WWOX;GRM7
pancreatic cancer DOID-1793 human GSE23952 sample 798	4/314	0.302738	0.990368	0	0	1.45538	1.73901	SYT1;MAP2;GLIS3;PRKCA
chronic lymphocytic leukemia DOID-1040 human GSE6691 sample 786	4/315	0.304727	0.990368	0	0	1.45063	1.72383	GPM6A;MAN2A1;TCF4;PITPNC1
melanoma DOID-1909 human GSE6887 sample 951	3/221	0.311237	0.990368	0	0	1.55054	1.80979	AGBL4;RBFOX1;PRKCA
asthma DOID-2841 human GSE27011 sample 566	4/322	0.31869	0.990368	0	0	1.41818	1.62174	PPP2R2B;SLC4A10;TCF4;PLCB1
nasopharynx carcinoma DOID-9261 human GSE12452 sample 774	3/225	0.320912	0.990368	0	0	1.52229	1.73022	CNTNAP2;XKR4;RYR3
non-systemic juvenile idiopathic arthritis (sJIA) (subgroup-RF-polyarthritis) DOID-848 human GSE21521 sample 578	4/327	0.328697	0.990368	0	0	1.39587	1.55308	GPM6A;KHDRBS2;PCDH9;MACROD2
Crohn's disease DOID-8778 human GSE6731 sample 757	3/230	0.333011	0.990368	0	0	1.48838	1.63659	WWOX;FRMPD4;PHACTR1
asthma DOID-2841 human GSE43696 sample 828	3/231	0.33543	0.990368	0	0	1.48178	1.61861	TENM2;GRIK2;XKR4
Spinal Muscular Atrophy, Infantile C0043116 mouse GSE3075 sample 126	5/432	0.336106	0.990368	0	0	1.32046	1.43974	GPM6A;NBEA;FYN;NXPH1;CALN1
Parkinson's disease DOID-14330 human GSE19587 sample 1080	5/433	0.337854	0.990368	0	0	1.31731	1.42947	GRIA2;DOCK4;PDZD2;FYN;PITPNC1
Down syndrome DOID-14250 human GSE20910 sample 1063	4/333	0.340729	0.990368	0	0	1.36999	1.47503	PCDH9;MALAT1;TCF4;NEAT1
pancreatic cancer DOID-1793 mouse GSE47811 sample 449	4/334	0.342736	0.990368	0	0	1.36577	1.46246	ROBO2;KCNC2;KCNQ3;LRP1B
Down syndrome DOID-14250 human GSE19681 sample 1065	4/335	0.344744	0.990368	0	0	1.36158	1.45002	DLC1;PIP4K2A;MALAT1;RYR3
Crohn's disease DOID-8778 human GSE1710 sample 992	2/139	0.348885	0.990368	0	0	1.64221	1.72927	GRIA1;ROBO2
prostate cancer DOID-10283 human GSE39452 sample 485	3/239	0.354764	0.990368	0	0	1.43096	1.48291	DAB1;NRG3;CTNNA2
polycystic ovary syndrome DOID-11612 human GSE48301 sample 806	3/241	0.359589	0.990368	0	0	1.41879	1.45113	ZBTB20;MDGA2;GRIA4
Fibrosis of lung (disorder) DOID-3770 mouse GSE43695 sample 631	3/242	0.362	0.990368	0	0	1.41278	1.43555	PDE4D;NRXN1;HS6ST3
HIV encephalitis C0276548 human GSE3489 sample 2	4/351	0.376873	0.990368	0	0	1.29773	1.26639	GRIA2;CADM1;SLC1A2;SLC1A3
osteoarthritis DOID-8398 rat GSE8077 sample 944	4/355	0.384892	0.990368	0	0	1.28268	1.22469	ATRNL1;MTUS2;SYN3;RYR3
Down Syndrome C0013080 human GSE5390 sample 277	5/460	0.385225	0.990368	0	0	1.23741	1.1804	MCTP1;LSAMP;PHACTR1;FYN;QKI
Anterior Horn Cell Disease C0154681 human GSE1481 sample 208	3/254	0.3908	0.990368	0	0	1.34442	1.26316	RBFOX1;SLC1A3;ADCY2
Peripheral motor neuropathy C0235025 mouse GSE1947 sample 104	3/256	0.395572	0.990368	0	0	1.33365	1.23686	CADM1;ADCY2;FYN
amyotrophic lateral sclerosis type 10 DOID-0060201 human GSE18632 sample 629	3/256	0.395572	0.990368	0	0	1.33365	1.23686	CNTNAP2;MAP2;PIP4K2A
Down Syndrome DOID-14250 human GSE23910 sample 494	4/361	0.396899	0.990368	0	0	1.26073	1.16501	MIR99AHG;CACNA1A;NEAT1;FBXL7
Uterine leiomyoma C0042133 human GSE2725 sample 399	3/258	0.400335	0.990368	0	0	1.32306	1.2112	GRIA2;FYN;FBXL7
autism spectrum disorder DOID-0060041 human GSE25507 sample 1028	3/261	0.407459	0.990368	0	0	1.30747	1.17387	PIP4K2A;MALAT1;NEAT1
multiple myeloma DOID-9538 human GSE36474 sample 707	3/262	0.409828	0.990368	0	0	1.30236	1.16172	NLGN1;NBEA;ANK3
adrenoleukodystrophy DOID-10588 human GSE34309 sample 864	3/262	0.409828	0.990368	0	0	1.30236	1.16172	AUTS2;MAN2A1;ASTN2
Huntington's disease DOID-12858 mouse GSE3248 sample 723	3/263	0.412195	0.990368	0	0	1.29728	1.14973	TCF4;ADCY2;ANK3
diffuse large B-cell lymphoma DOID-0050745 mouse GSE6136 sample 684	2/160	0.414877	0.990368	0	0	1.42242	1.25141	MALAT1;NEAT1
Huntington's disease DOID-12858 mouse GSE3248 sample 726	4/372	0.418811	0.990368	0	0	1.22235	1.06386	MACF1;SYT1;CADPS;FYN
facioscapulohumeral muscular dystrophy DOID-11727 human GSE15090 sample 540	4/372	0.418811	0.990368	0	0	1.22235	1.06386	MEF2C;MALAT1;SORBS1;LRP1B
colon cancer DOID-219 mouse GSE63032 sample 661	4/372	0.418811	0.990368	0	0	1.22235	1.06386	PDZD2;MCTP1;MAN2A1;HCN1
Emery-Dreifuss muscular dystrophy, autosomal recessive form DOID-11726 mouse GSE8000 sample 677	3/266	0.419277	0.990368	0	0	1.28229	1.11459	MTUS2;MALAT1;NEAT1
Primary open angle glaucoma C0339573 human GSE4316 sample 284	4/373	0.420795	0.990368	0	0	1.21898	1.05516	MEF2C;NFIA;SLC1A3;SORBS1
intracranial aneurysm DOID-10941 human GSE26969 sample 744	2/163	0.424043	0.990368	0	0	1.39571	1.1974	TENM2;NEBL
Escherichia coli infection of the central nervous system C1320188 mouse GSE3253 sample 341	4/375	0.424758	0.990368	0	0	1.21228	1.038	GPM6A;FMNL2;SYT1;CADPS
Squamous cell carcinoma of mouth C0585362 human GSE3524 sample 295	4/376	0.426737	0.990368	0	0	1.20896	1.02954	PTPRD;RYR2;MEF2C;MCTP1
Uterine leiomyoma C0042133 human GSE593 sample 16	3/270	0.428676	0.990368	0	0	1.26282	1.06967	GRIA2;MACF1;FBXL7
Muscular Dystrophy C0026850 mouse GSE2507 sample 232	3/271	0.431018	0.990368	0	0	1.25804	1.05878	MACF1;RYR2;TCF4
Down syndrome DOID-14250 human GSE16677 sample 1064	4/381	0.436606	0.990368	0	0	1.19262	0.988353	DLC1;PIP4K2A;MALAT1;RYR3
nephrosclerosis DOID-11664 human GSE20602 sample 905	4/382	0.438575	0.990368	0	0	1.18941	0.980338	TCF4;GPC5;PTPRG;MAP4K4
amyotrophic lateral sclerosis DOID-332 mouse GSE3343 sample 683	3/275	0.44035	0.990368	0	0	1.23929	1.01645	GPM6A;PIP4K2A;MALAT1
Alzheimer's disease DOID-10652 human GSE36980 sample 520	3/275	0.44035	0.990368	0	0	1.23929	1.01645	DTNA;NFIA;SORBS1
idiopathic pulmonary fibrosis DOID-0050156 human GSE24206 sample 871	3/277	0.444994	0.990368	0	0	1.23012	0.996018	ROBO2;NTM;GPC5
Smoldering multiple myeloma C1531608 human GSE5900 sample 404	4/388	0.450344	0.990368	0	0	1.17046	0.933727	MEF2C;MALAT1;TCF4;NEAT1
Down syndrome DOID-14250 human GSE19681 sample 1066	3/280	0.451933	0.990368	0	0	1.21661	0.966256	DLC1;MALAT1;NEAT1
systemic lupus erythematosus DOID-9074 human GSE55447 sample 1073	3/282	0.456539	0.990368	0	0	1.20776	0.946984	CDH20;LRRC4C;RNF220
Non-syndromic cleft lip and palate DOID-9296 human GSE42589 sample 618	2/174	0.457	0.990368	0	0	1.30571	1.02247	NLGN1;ZNF804A
Parkinson's disease DOID-14330 human GSE19587 sample 740	4/393	0.460093	0.990368	0	0	1.15512	0.896749	GRIA2;DOCK4;MAN2A1;PITPNC1
Senescence C0001792 human GSE1572 sample 408	3/286	0.465702	0.990368	0	0	1.19045	0.90975	PHLPP1;PIP4K2A;QKI
Hypoxia C0242184 mouse GSE2271 sample 446	3/290	0.474799	0.990368	0	0	1.17362	0.874184	MALAT1;FYN;MAP4K4
Nephroblastoma C0027708 human GSE2712 sample 418	2/181	0.477404	0.990368	0	0	1.25421	0.927351	CADM1;TCF4
bipolar disorder DOID-3312 human GSE62191 sample 546	3/294	0.483824	0.990368	0	0	1.15725	0.840199	ATRNL1;CTNNA3;LHFPL3
schizophrenia DOID-5419 human GSE12679 sample 543	3/295	0.486069	0.990368	0	0	1.15322	0.83194	SLC1A3;CSMD3;PITPNC1
idiopathic pulmonary fibrosis DOID-0050156 human GSE24206 sample 869	4/408	0.488972	0.990368	0	0	1.11137	0.79513	ROBO2;NTM;GPC5;RYR3
Breast Cancer C0006142 human GSE1379 sample 392	3/298	0.492777	0.990368	0	0	1.14132	0.807712	CNTNAP2;LRP1B;FBXL7
Breast Cancer C0006142 human GSE1378 sample 52	3/301	0.499441	0.990368	0	0	1.12966	0.784282	CADM1;PDE4D;LRP1B
multiple sclerosis DOID-2377 human GSE21942 sample 743	3/301	0.499441	0.990368	0	0	1.12966	0.784282	PIP4K2A;MALAT1;NEAT1
schizophrenia DOID-5419 human GSE27383 sample 549	3/304	0.506061	0.990368	0	0	1.11823	0.761621	CACNA1A;TMTC2;MACROD2
Lymphatic edema C0024236 mouse GSE4333 sample 207	3/306	0.51045	0.990368	0	0	1.11073	0.746925	DLGAP1;GRIN2B;ST18
Huntington's disease DOID-12858 mouse GSE19780 sample 527	3/306	0.51045	0.990368	0	0	1.11073	0.746925	FSTL5;DGKB;MAP2
Cardiomyopathy, Dilated C0007193 human GSE9800 sample 115	3/309	0.516995	0.990368	0	0	1.09967	0.725479	MCTP1;SNTG1;MALAT1
pulmonary sarcoidosis DOID-13406 human GSE16538 sample 916	4/423	0.517215	0.990368	0	0	1.07076	0.705947	MCTP1;PDE4B;TCF4;THSD7A
melanoma in situ UMLS CUI-C0346040 human GSE4587 sample 980	2/196	0.519521	0.990368	0	0	1.15635	0.757232	GPM6A;MALAT1
Huntington's disease DOID-12858 mouse GSE3248 sample 722	3/312	0.523493	0.990368	0	0	1.08883	0.704724	MACF1;CTNND2;FYN
pancreatic cancer DOID-1793 human GSE49515 sample 555	3/312	0.523493	0.990368	0	0	1.08883	0.704724	SLC4A10;ZNF385D;NEAT1
Epilepsy C0014544 human GSE7486 sample 417	2/199	0.527671	0.990368	0	0	1.13856	0.727863	MALAT1;NEAT1
bipolar disorder DOID-3312 human GSE46449 sample 572	2/199	0.527671	0.990368	0	0	1.13856	0.727863	PTPRN2;KAZN
facioscapulohumeral muscular dystrophy DOID-11727 human GSE36398 sample 672	3/314	0.527799	0.990368	0	0	1.08172	0.69126	FMNL2;CDH20;ATRNL1
Huntington's disease DOID-12858 human GSE8762 sample 931	3/315	0.529944	0.990368	0	0	1.07819	0.684636	PDE4B;PIP4K2A;NEAT1
Epilepsy DOID-1826 rat GSE2880 sample 804	2/203	0.538393	0.990368	0	0	1.11568	0.690791	GPM6A;MAP2
Retinal damage C0235272 rat GSE1001 sample 312	3/321	0.5427	0.990368	0	0	1.05753	0.646359	SYT1;PPP2R2B;SLC1A3
Generalized seizures C0234533 mouse GSE6614 sample 169	3/321	0.5427	0.990368	0	0	1.05753	0.646359	SYT1;CADPS;FYN
Type 2 diabetes mellitus C0011860 mouse GSE2899 sample 203	3/323	0.546907	0.990368	0	0	1.05081	0.634137	TCF4;ANK3;SORBS1
Cardiomyopathy, Dilated C0007193 human GSE3585 sample 198	3/326	0.553177	0.990368	0	0	1.04089	0.616286	AUTS2;PCDH9;PIP4K2A
allergic asthma DOID-9415 human GSE41649 sample 716	3/329	0.559395	0.990368	0	0	1.03115	0.598994	MCTP1;NEAT1;RYR3
atherosclerosis DOID-1936 human GSE43292 sample 508	3/329	0.559395	0.990368	0	0	1.03115	0.598994	ROBO2;DGKB;THSD7A
systemic lupus erythematosus DOID-9074 mouse GSE2376 sample 633	3/331	0.563512	0.990368	0	0	1.02476	0.587767	MAN2A1;FYN;NEAT1
sickle-cell anemia DOID-10923 human GSE16728 sample 507	3/332	0.565562	0.990368	0	0	1.02159	0.582241	KHDRBS2;KCND2;CCSER1
Breast Cancer DOID-1612 human GSE34925 sample 478	2/218	0.577096	0.990368	0	0	1.03741	0.570311	RYR2;SLC44A1
non-systemic juvenile idiopathic arthritis (sJIA) (subgroup-psoriatic) DOID-848 human GSE21521 sample 580	3/338	0.577738	0.990368	0	0	1.00299	0.550273	GPM6A;NEBL;PDE4B
Retinitis Pigmentosa C0035334 mouse GSE128 sample 33	3/338	0.577738	0.990368	0	0	1.00299	0.550273	SYT1;MAP2;CADPS
neurofibromatosis DOID-8712 mouse GSE29343 sample 670	4/458	0.580118	0.990368	0	0	0.986428	0.537132	NEGR1;MAN2A1;PCDH7;SLC1A3
Alzheimer's disease DOID-10652 human GSE36980 sample 523	3/341	0.583745	0.990368	0	0	0.99393	0.535023	MACF1;MALAT1;SYN3
low-grade serous ovarian carcinomas DOID-0050933 human GSE56443 sample 755	3/341	0.583745	0.990368	0	0	0.99393	0.535023	MAML2;SLC1A3;SORBS1
amyotrophic lateral sclerosis DOID-332 human GSE833 sample 1006	3/341	0.583745	0.990368	0	0	0.99393	0.535023	GPM6A;CTNND2;SLC1A3
polycystic ovary syndrome DOID-11612 human GSE48301 sample 818	2/222	0.587011	0.990368	0	0	1.01834	0.54248	ZBTB20;GRIA4
Sjogren's syndrome DOID-12894 human GSE23117 sample 890	2/223	0.589463	0.990368	0	0	1.01368	0.535772	MALAT1;NEAT1
breast cancer DOID-1612 human GSE9574 sample 448	3/344	0.589699	0.990368	0	0	0.985034	0.520238	AUTS2;ERBB4;ZBTB20
ALS (Amyotrophic Lateral Sclerosis) C0002736 human GSE833 sample 283	3/345	0.591672	0.990368	0	0	0.982103	0.515411	GPM6A;CTNND2;SLC1A3
breast cancer DOID-1612 human GSE26910 sample 602	2/224	0.591904	0.990368	0	0	1.00906	0.529162	PCDH7;GLIS3
Dehydration C0011175 rat GSE3131 sample 60	2/225	0.594335	0.990368	0	0	1.00448	0.522646	DPP6;FYN
Teratospermia UMLS CUI-C0919628 human GSE6872 sample 953	2/228	0.601562	0.990368	0	0	0.990999	0.503652	UNC5D;XKR4
osteoarthritis DOID-8398 human GSE16464 sample 751	2/229	0.603949	0.990368	0	0	0.986583	0.4975	MALAT1;NEAT1
Carcinoma, Hepatocellular C0019204 human GSE3632 sample 125	3/353	0.607233	0.990368	0	0	0.959261	0.478521	ATRNL1;MSI2;MAP4K4
asthma DOID-2841 human GSE43696 sample 827	2/235	0.618048	0.990368	0	0	0.960883	0.462367	GPC5;PLCB1
polycystic ovary syndrome DOID-11612 human GSE48301 sample 558	1/108	0.618117	0.990368	0	0	1.04694	0.50366	SYT1
glomerulosclerosis DOID-0050851 mouse GSE20844 sample 492	2/238	0.624952	0.990368	0	0	0.948523	0.445882	RBFOX1;OPCML
adrenoleukodystrophy DOID-10588 human GSE34308 sample 709	3/365	0.629832	0.990368	0	0	0.926891	0.428504	NTM;TCF4;OPCML
Chronic Lymphocytic Leukemia (Chronic B-lymphocytic leukemia) UMLS CUI-C0023434 human GSE26725 sample 745	2/241	0.63176	0.990368	0	0	0.936473	0.430071	GPM6A;MSI2
allergic contact dermatitis DOID-3042 human GSE6281 sample 925	2/243	0.636246	0.990368	0	0	0.928607	0.419889	TENM2;MALAT1
Ulcerative Colitis C0009324 human GSE6731 sample 249	2/246	0.642894	0.990368	0	0	0.917049	0.40513	RYR2;GPC5
Viral cardiomyopathy C0264797 human GSE4172 sample 384	3/373	0.644396	0.990368	0	0	0.906477	0.398344	TENM2;NEBL;NEAT1
osteoarthritis DOID-8398 rat GSE8077 sample 943	3/374	0.646188	0.990368	0	0	0.903987	0.39474	NRXN1;SYN3;ANKS1B
Preeclampsia C0032914 human GSE4707 sample 352	3/375	0.647974	0.990368	0	0	0.901511	0.39117	NEGR1;FRMPD4;NXPH1
Gastrointestinal stromal tumor C0238198 human GSE15966 sample 76	3/380	0.656807	0.990368	0	0	0.889326	0.373841	SYT1;MTUS2;ZNF385D
type 2 diabetes mellitus DOID-9352 human GSE23343 sample 895	2/253	0.658035	0.990368	0	0	0.891155	0.372946	KHDRBS2;SLC1A3
cerebral palsy DOID-1969 human GSE11686 sample 912	3/381	0.658555	0.990368	0	0	0.886928	0.370476	MEF2C;RBFOX1;ZBTB20
Diabetes DOID-9351 mouse GSE31150 sample 805	2/254	0.660156	0.990368	0	0	0.887574	0.368591	KHDRBS2;NEAT1
Type 1 diabetes mellitus C0011854 mouse GSE4616 sample 363	2/257	0.666456	0.990368	0	0	0.876997	0.355869	SORBS1;SLC8A1
adrenoleukodystrophy DOID-10588 human GSE34309 sample 865	2/258	0.668535	0.990368	0	0	0.873527	0.35174	NBEA;MAN2A1
Down syndrome DOID-14250 mouse GSE39159 sample 529	4/516	0.673335	0.990368	0	0	0.872065	0.344913	MAN2A1;PRKCA;CTNNA3;FYN
progressive myoclonus epilepsy DOID-891 mouse GSE47516 sample 518	2/261	0.67471	0.990368	0	0	0.863276	0.339675	RYR2;PCDH9
Uterine leiomyoma C0042133 human GSE2724 sample 225	2/262	0.676747	0.990368	0	0	0.859912	0.335759	GRIA2;FBXL7
diffuse large B-cell lymphoma DOID-0050745 mouse GSE6136 sample 688	2/263	0.678775	0.990368	0	0	0.856574	0.331893	MALAT1;TCF4
schizophrenia DOID-5419 human GSE62191 sample 545	2/263	0.678775	0.990368	0	0	0.856574	0.331893	PDZD2;GLIS3
myotonic dystrophy type 1 DOID-11722 human GSE7177 sample 1054	2/263	0.678775	0.990368	0	0	0.856574	0.331893	MAN2A1;MALAT1
Setleis syndrome C1744559 human GSE16524 sample 285	3/393	0.67903	0.990368	0	0	0.859107	0.332552	MAN2A1;TCF4;NEAT1
Heart Injury C0018805 mouse GSE4710 sample 75	2/264	0.680792	0.990368	0	0	0.853261	0.328078	MALAT1;NEAT1
Neurofibromatosis DOID-8712 mouse GSE1482 sample 665	2/265	0.682798	0.990368	0	0	0.849973	0.324312	PPP2R2B;TCF4
Hutchinson-Gilford progeria syndrome UMLS CUI-C0033300 mouse GSE32609 sample 984	2/265	0.682798	0.990368	0	0	0.849973	0.324312	MAN2A1;MALAT1
APECED - Autoimmune polyendocrinopathy-candidiasis-ectodermal dystrophy C0085859 mouse GSE85 sample 6	2/266	0.684795	0.990368	0	0	0.84671	0.320595	PRKCA;PITPNC1
Alcohol poisoning C0392620 rat GSE3311 sample 288	2/267	0.686781	0.990368	0	0	0.843472	0.316926	PTPRN2;MAN2A1
asthma DOID-2841 human GSE43696 sample 830	2/267	0.686781	0.990368	0	0	0.843472	0.316926	KCND2;SLC1A2
RA (rheumatoid arthritis) C0003873 human GSE3592 sample 183	2/268	0.688757	0.990368	0	0	0.840258	0.313305	ROBO2;KCNAB1
idiopathic pulmonary fibrosis DOID-0050156 human GSE24206 sample 873	3/401	0.692171	0.990368	0	0	0.841492	0.309603	ROBO2;NTM;RYR3
Turner Syndrome C0041408 mouse GSE1606 sample 218	2/271	0.694623	0.990368	0	0	0.830759	0.302717	CTNND2;TCF4
systemic lupus erythematosus DOID-9074 human GSE55447 sample 1079	2/273	0.698484	0.990368	0	0	0.824544	0.295882	CNTNAP2;ADCY2
Spinal Cord Injury C0037929 rat GSE16710 sample 427	2/274	0.700399	0.990368	0	0	0.821471	0.29253	MAP2;DLGAP1
muscular dystrophy DOID-9884 human GSE42806 sample 530	2/275	0.702304	0.990368	0	0	0.81842	0.28922	CADM2;CTNNA3
Cardiac Failure C0018801 mouse GSE1988 sample 273	2/275	0.702304	0.990368	0	0	0.81842	0.28922	DST;NEAT1
Huntington's disease DOID-12858 mouse GSE3248 sample 725	2/276	0.704199	0.990368	0	0	0.815391	0.285953	CTNND2;CADPS
Nemaline Myopathy C0206157 mouse GSE3384 sample 160	2/276	0.704199	0.990368	0	0	0.815391	0.285953	MEF2C;ADCY2
Wolfram syndrome UMLS CUI-C0043207 mouse GSE15293 sample 694	2/276	0.704199	0.990368	0	0	0.815391	0.285953	NRG3;HCN1
Muscular Dystrophy C0026850 mouse GSE2507 sample 405	2/278	0.70796	0.990368	0	0	0.8094	0.279541	MACF1;RYR2
Dehydration C0011175 rat GSE4130 sample 210	2/278	0.70796	0.990368	0	0	0.8094	0.279541	PTPRN2;OXR1
Neurological pain disorder C0423704 rat GSE18803 sample 212	3/411	0.708028	0.990368	0	0	0.820445	0.283276	MEF2C;GRM7;MAN2A1
familial combined hyperlipidemia DOID-13809 human GSE11393 sample 773	2/279	0.709825	0.990368	0	0	0.806436	0.276396	DOCK4;TCF4
Generalized seizures C0234533 rat GSE1156 sample 342	2/282	0.715361	0.990368	0	0	0.797673	0.267195	MYT1L;OPCML
precursor B lymphoblastic lymphoma/leukemia DOID-7061 human GSE29639 sample 803	3/416	0.715721	0.990368	0	0	0.810303	0.271018	SYT1;CACNA1A;FYN
amyotrophic lateral sclerosis DOID-332 human GSE833 sample 1007	3/416	0.715721	0.990368	0	0	0.810303	0.271018	GPM6A;CTNND2;SLC1A3
Dystonia C0393593 human GSE3064 sample 329	2/283	0.717187	0.990368	0	0	0.794794	0.264204	DTNA;PCDH9
hepatocellular carcinoma DOID-684 human GSE60502 sample 656	2/283	0.717187	0.990368	0	0	0.794794	0.264204	NTM;PLCB1
Sepsis C0243026 mouse GSE4479 sample 150	2/284	0.719003	0.990368	0	0	0.791935	0.261251	PHLPP1;FRMD4A
prostate cancer DOID-10283 human GSE3325 sample 991	2/285	0.720809	0.990368	0	0	0.789096	0.258335	MALAT1;NEAT1
melanoma DOID-1909 human GSE6887 sample 949	2/285	0.720809	0.990368	0	0	0.789096	0.258335	KCNQ5;MACROD2
Senescence C0001792 rat GSE854 sample 161	2/286	0.722606	0.990368	0	0	0.786278	0.255455	TCF4;DLGAP1
ulcerative colitis DOID-8577 human GSE6731 sample 760	2/286	0.722606	0.990368	0	0	0.786278	0.255455	RYR2;PDE4B
invasive lobular carcinoma DOID-3457 human GSE5764 sample 625	2/287	0.724393	0.990368	0	0	0.783479	0.252611	MALAT1;NEAT1
systemic lupus erythematosus DOID-9074 human GSE55447 sample 1074	2/287	0.724393	0.990368	0	0	0.783479	0.252611	CADM1;LRRC4C
Huntington's disease DOID-12858 human GSE3248 sample 724	2/288	0.72617	0.990368	0	0	0.780699	0.249801	MACF1;CTNND2
Hypertrophy, Left Ventricular C0149721 mouse GSE2459 sample 382	2/289	0.727937	0.990368	0	0	0.777939	0.247027	CADPS;SORBS1
Williams-Beuren syndrome DOID-1928 human GSE16715 sample 903	2/290	0.729695	0.990368	0	0	0.775198	0.244287	TENM2;KHDRBS3
psoriasis DOID-8893 human GSE13355 sample 837	2/291	0.731444	0.990368	0	0	0.772477	0.241581	TENM2;XKR4
Obesity C0028754 mouse GSE4692 sample 319	2/291	0.731444	0.990368	0	0	0.772477	0.241581	TCF4;SORBS1
Cancer of the testis C0153594 human GSE1818 sample 246	1/148	0.733	0.990368	0	0	0.760513	0.236223	SLC44A1
Sjogren's syndrome DOID-12894 human GSE23117 sample 889	2/292	0.733182	0.990368	0	0	0.769773	0.238908	MALAT1;NEAT1
Type 2 diabetes mellitus C0011860 mouse GSE2899 sample 279	2/292	0.733182	0.990368	0	0	0.769773	0.238908	MAN2A1;SORBS1
cerebral palsy DOID-1969 human GSE11686 sample 913	2/292	0.733182	0.990368	0	0	0.769773	0.238908	MEF2C;RBFOX1
Gamma-hydroxybutyric acidaemia C0268631 mouse GSE2866 sample 205	2/292	0.733182	0.990368	0	0	0.769773	0.238908	MACF1;FYN
psoriasis DOID-8893 mouse GSE27628 sample 824	2/293	0.734912	0.990368	0	0	0.767089	0.236267	GRIP1;FMNL2
idiopathic pulmonary fibrosis DOID-0050156 human GSE24206 sample 867	2/293	0.734912	0.990368	0	0	0.767089	0.236267	ROBO2;NTM
Senescence C0001792 mouse GSE5078 sample 331	2/293	0.734912	0.990368	0	0	0.767089	0.236267	CADPS;ANK3
Huntington's disease DOID-12858 human GSE8762 sample 930	3/429	0.734992	0.990368	0	0	0.785049	0.241713	PDE4B;PHACTR1;NEAT1
nemaline myopathy DOID-3191 mouse GSE3384 sample 976	1/150	0.73774	0.990368	0	0	0.750229	0.228192	MEF2C
MELAS - Mitochondrial myopathy, encephalopathy, lactic acidosis and stroke-like episodes C0162671 human GSE1462 sample 102	3/431	0.737865	0.990368	0	0	0.7813	0.237511	MEF2C;RBFOX1;RYR3
inclusion body myositis DOID-3429 human GSE48280 sample 706	3/431	0.737865	0.990368	0	0	0.7813	0.237511	TCF4;PITPNC1;RYR3
type 2 diabetes mellitus DOID-9352 mouse GSE54917 sample 614	2/296	0.740043	0.990368	0	0	0.759145	0.228539	MSI2;NEAT1
Breast Cancer C0006142 human GSE3744 sample 24	1/151	0.740079	0.990368	0	0	0.745189	0.224301	SYT1
Carcinoma, Hepatocellular C0019204 human GSE6764 sample 407	2/297	0.741734	0.990368	0	0	0.756533	0.226025	MALAT1;NEAT1
dilated cardiomyopathy DOID-12930 human GSE42955 sample 678	2/297	0.741734	0.990368	0	0	0.756533	0.226025	PCDH7;KCNAB1
Familial combined hyperlipidaemia C0020474 human GSE11393 sample 267	2/298	0.743416	0.990368	0	0	0.753938	0.223542	DOCK4;TCF4
myelodysplastic syndrome DOID-0050908 human GSE19429 sample 749	2/300	0.746753	0.990368	0	0	0.748802	0.218666	MALAT1;NEAT1
monoclonal gammopathy of uncertain significance DOID-7442 human GSE47552 sample 563	2/300	0.746753	0.990368	0	0	0.748802	0.218666	CNTN5;NBEA
liver cirrhosis DOID-5082 human GSE50892 sample 1012	2/301	0.748407	0.990368	0	0	0.746259	0.216272	KCNIP4;KCTD16
renal cell carcinoma DOID-4450 human GSE38424 sample 664	2/302	0.750052	0.990368	0	0	0.743733	0.213907	PHACTR1;FYN
breast cancer DOID-1612 human GSE3744 sample 978	1/157	0.753681	0.990368	0	0	0.71631	0.202563	SYT1
acute myocardial infarction DOID-9408 mouse GSE775 sample 1000	3/443	0.754587	0.990368	0	0	0.759522	0.21387	RYR2;TCF4;SLC8A1
Parkinson's disease DOID-14330 human GSE19587 sample 741	1/158	0.755878	0.990368	0	0	0.711711	0.19919	QKI
Down syndrome DOID-14250 human GSE42956 sample 1061	2/306	0.75654	0.990368	0	0	0.733797	0.204729	NRG3;SLC1A3
Huntington's disease DOID-12858 mouse GSE3583 sample 929	2/307	0.75814	0.990368	0	0	0.731354	0.202503	ARL15;MAN2A1
nephronophthisis DOID-12712 mouse GSE6113 sample 942	2/307	0.75814	0.990368	0	0	0.731354	0.202503	MAN2A1;LRRC4C
Papillary Carcinoma of the Thyroid C0238463 human GSE3678 sample 306	2/308	0.75973	0.990368	0	0	0.728926	0.200303	MAP2;NEAT1
acute myocardial infarction DOID-9408 mouse GSE775 sample 1001	2/308	0.75973	0.990368	0	0	0.728926	0.200303	TCF4;FYN
Intestinal metaplasia of gastric mucosa C0267187 human GSE2669 sample 349	2/308	0.75973	0.990368	0	0	0.728926	0.200303	SLC1A2;PDE4B
Cardiomyopathy, Dilated C0007193 human GSE3586 sample 323	3/450	0.763942	0.990368	0	0	0.747358	0.201236	NFIA;MTUS2;CTNNA3
Idiosyncratic drug effect C0277580 rat GSE2825 sample 304	2/311	0.764447	0.990368	0	0	0.721738	0.193861	SYN3;OXR1
Barrett's esophagus DOID-9206 human GSE34619 sample 596	2/311	0.764447	0.990368	0	0	0.721738	0.193861	PRKCA;CCSER1
acute myeloid leukemia DOID-9119 human GSE9476 sample 782	1/163	0.766575	0.990368	0	0	0.689569	0.183303	CADM1
multiple myeloma DOID-9538 human GSE6691 sample 787	3/454	0.769158	0.990368	0	0	0.740576	0.194371	SYT1;CADM1;NEAT1
systemic lupus erythematosus DOID-9074 human GSE10325 sample 692	2/315	0.770612	0.990368	0	0	0.712369	0.185622	FYN;PITPNC1
Infection by Yersinia enterocolitica C0238528 mouse GSE2973 sample 127	2/316	0.772132	0.990368	0	0	0.710064	0.183623	PDE4B;MALAT1
pancreatic intraductal papillary-mucinous adenoma DOID-7851 human GSE19650 sample 608	2/316	0.772132	0.990368	0	0	0.710064	0.183623	MALAT1;NEAT1
nasopharynx carcinoma DOID-9261 human GSE12452 sample 777	1/167	0.774796	0.990368	0	0	0.672816	0.171673	TENM2
polycystic ovary syndrome DOID-11612 human GSE10946 sample 825	2/320	0.778122	0.990368	0	0	0.700988	0.175859	KCND2;RYR3
pancreatic non-invasive intraductal papillary-mucinous carcinoma DOID-7685 human GSE19650 sample 609	2/320	0.778122	0.990368	0	0	0.700988	0.175859	MALAT1;NEAT1
systemic juvenile idiopathic arthritis (sJIA) (enthesitis-related) DOID-848 human GSE21521 sample 575	2/322	0.781065	0.990368	0	0	0.696536	0.172112	PCDH9;CTNNA2
Idiopathic fibrosing alveolitis C0085786 human GSE21369 sample 321	2/323	0.782524	0.990368	0	0	0.69433	0.170271	ROBO2;NTM
Polycystic Ovary Syndrome C0032460 human GSE5090 sample 308	2/325	0.785417	0.990368	0	0	0.68996	0.166654	PDZD2;TCF4
polycystic ovary syndrome DOID-11612 human GSE8157 sample 880	2/325	0.785417	0.990368	0	0	0.68996	0.166654	MEF2C;MALAT1
Turner syndrome DOID-3491 human GSE58435 sample 1059	2/328	0.789692	0.990368	0	0	0.683506	0.161384	KCNQ5;KCTD16
idiopathic pulmonary fibrosis DOID-0050156 human GSE24206 sample 868	2/329	0.791101	0.990368	0	0	0.681381	0.159668	ROBO2;NTM
ulcerative colitis DOID-8577 human GSE11223 sample 590	2/329	0.791101	0.990368	0	0	0.681381	0.159668	PTPRN2;LHFPL3
Chronic phase chronic myelogenous leukemia DOID-8552 human GSE5550 sample 456	2/330	0.792501	0.990368	0	0	0.679268	0.157972	MAN2A1;DLC1
schizophrenia DOID-5419 human GSE17612 sample 852	2/332	0.795277	0.990368	0	0	0.675082	0.154638	MAP2;CTNNA2
Type 2 diabetes mellitus C0011860 mouse GSE2899 sample 45	2/332	0.795277	0.990368	0	0	0.675082	0.154638	MAN2A1;ERBB4
lupus erythematosus DOID-8857 human GSE30153 sample 739	2/333	0.796652	0.990368	0	0	0.673008	0.152999	MAP2;MACROD2
CML - Chronic myeloid leukemia C0023473 human GSE11889 sample 403	2/334	0.79802	0.990368	0	0	0.670947	0.15138	MEF2C;ZBTB20
Intestinal polyposis UMLS CUI-C1257915 mouse GSE6078 sample 952	1/180	0.799576	0.990368	0	0	0.62354	0.139469	NEAT1
Status Epilepticus C0038220 rat GSE4236 sample 391	2/336	0.800731	0.990368	0	0	0.666861	0.148197	MYT1L;OXR1
psoriasis DOID-8893 human GSE32407 sample 836	2/337	0.802074	0.990368	0	0	0.664836	0.146632	ARL15;FYN
Dehydration C0011175 rat GSE3110 sample 443	2/337	0.802074	0.990368	0	0	0.664836	0.146632	PIP4K2A;OXR1
Systemic lupus erythematosus (SLE) C0024141 human GSE12374 sample 123	2/344	0.811256	0.990368	0	0	0.650994	0.13617	GRIP1;RGS7
ulcerative colitis DOID-8577 human GSE11223 sample 585	2/345	0.812536	0.990368	0	0	0.649063	0.134742	PTPRN2;NEAT1
amyotrophic lateral sclerosis DOID-332 mouse GSE10953 sample 679	3/491	0.813085	0.990368	0	0	0.683119	0.141351	PTPRD;MALAT1;ADCY2
Diabetic Retinopathy C0011884 rat GSE1979 sample 189	2/346	0.813809	0.990368	0	0	0.647143	0.133331	PPP2R2B;SLC1A3
nemaline myopathy DOID-3191 mouse GSE3384 sample 971	3/493	0.815245	0.990368	0	0	0.68026	0.138954	MACF1;MEF2C;ZBTB20
psoriatic arthritis DOID-9008 human GSE61281 sample 696	2/349	0.817581	0.990368	0	0	0.641449	0.129192	SYT1;SLC1A2
discoid lupus erythematosus UMLS CUI-C0024138 human GSE52471 sample 689	2/360	0.830836	0.990368	0	0	0.621389	0.115158	CNTNAP2;MAP2
sporadic breast cancer DOID-8029 human GSE3744 sample 979	1/200	0.832507	0.990368	0	0	0.560302	0.102711	KHDRBS3
Streptococcal tonsillitis C0275804 mouse GSE11494 sample 263	1/200	0.832507	0.990368	0	0	0.560302	0.102711	NEAT1
pancreatitis DOID-4989 mouse GSE3644 sample 513	2/362	0.833151	0.990368	0	0	0.617873	0.112787	KAZN;NEAT1
diffuse large B-cell lymphoma DOID-0050745 mouse GSE6136 sample 686	1/203	0.836959	0.990368	0	0	0.551896	0.0982263	MALAT1
polycystic ovary syndrome 11612 human GSE48301 sample 468	1/203	0.836959	0.990368	0	0	0.551896	0.0982263	GRIA4
Ulcerative Colitis C0009324 human GSE1710 sample 264	1/203	0.836959	0.990368	0	0	0.551896	0.0982263	ROBO2
Lewy body dementia DOID-12217 human GSE49036 sample 1068	2/366	0.837697	0.990368	0	0	0.610958	0.1082	RYR2;MAN2A1
Bipolar Disorder C0005586 human GSE5389 sample 302	1/205	0.839862	0.990368	0	0	0.546429	0.0953617	SLC1A3
HIV - Human immunodeficiency virus infection C0019693 human GSE2171 sample 40	2/374	0.846455	0.990368	0	0	0.597573	0.0996146	MACF1;FYN
LGLL - Large granular lymphocytic leukemia C1522378 human GSE10631 sample 47	2/375	0.847519	0.990368	0	0	0.59594	0.0985936	AUTS2;FYN
polycystic ovary syndrome DOID-11612 human GSE34526 sample 797	2/382	0.854784	0.990368	0	0	0.584752	0.0917516	MALAT1;NEAT1
Diamond-Blackfan anaemia DOID-1339 human GSE14335 sample 472	2/382	0.854784	0.990368	0	0	0.584752	0.0917516	PHACTR1;RGS7
schizophrenia DOID-5419 human GSE12679 sample 768	2/384	0.856801	0.990368	0	0	0.581631	0.0898908	SLC1A3;PITPNC1
cardiomyopathy DOID-0050700 human GSE9128 sample 780	2/385	0.8578	0.990368	0	0	0.580082	0.0889755	MCTP1;OXR1
ulcerative colitis DOID-8577 human GSE11223 sample 587	2/386	0.858793	0.990368	0	0	0.578542	0.0880701	PTPRN2;SLC1A3
Type 1 diabetes mellitus C0011854 human GSE10586 sample 9	2/387	0.859779	0.990368	0	0	0.577009	0.0871744	NBEA;KCNQ5
Thrombocytopenia C0040034 mouse GSE2527 sample 253	1/226	0.867402	0.990368	0	0	0.494899	0.0704009	NEAT1
lung large cell carcinoma DOID-4556 human GSE51852 sample 732	1/226	0.867402	0.990368	0	0	0.494899	0.0704009	GRIP1
Familial combined hyperlipidaemia C0020474 human GSE1010 sample 137	1/226	0.867402	0.990368	0	0	0.494899	0.0704009	PHACTR1
nasopharynx carcinoma DOID-9261 human GSE12452 sample 775	1/227	0.868589	0.990368	0	0	0.492684	0.0694122	XKR4
Anaplasmosis C0002797 human GSE2600 sample 21	1/227	0.868589	0.990368	0	0	0.492684	0.0694122	NEAT1
type 1 diabetes mellitus 9744 rat GSE4990 sample 474	1/227	0.868589	0.990368	0	0	0.492684	0.0694122	PIP4K2A
Small cell carcinoma of lung C0149925 human GSE1037 sample 362	1/227	0.868589	0.990368	0	0	0.492684	0.0694122	KIAA1217
B-cell chronic lymphocytic leukaemia/small lymphocytic lymphoma C0023458 human GSE8835 sample 194	1/228	0.869765	0.990368	0	0	0.490489	0.068439	TCF4
Adenoma C0001430 human GSE8514 sample 294	1/229	0.870931	0.990368	0	0	0.488312	0.0674813	MALAT1
Papillary Carcinoma of the Thyroid C0238463 human GSE3467 sample 397	2/400	0.872044	0.990368	0	0	0.557789	0.0763699	SDK1;FYN
ulcerative colitis DOID-8577 human GSE1710 sample 993	1/230	0.872086	0.990368	0	0	0.486155	0.0665386	ROBO2
allergic contact dermatitis DOID-3042 human GSE6281 sample 926	1/232	0.874366	0.990368	0	0	0.481897	0.0646975	MALAT1
Breast Cancer C0006142 rat GSE1872 sample 63	1/233	0.875491	0.990368	0	0	0.479795	0.0637984	MSI2
diffuse large B-cell lymphoma DOID-0050745 mouse GSE6136 sample 687	1/234	0.876606	0.990368	0	0	0.477712	0.0629134	MALAT1
idiopathic urticaria DOID-1555 human GSE57178 sample 815	2/408	0.879096	0.990368	0	0	0.546573	0.0704321	PIP4K2A;SLC1A3
Rift Valley fever DOID-1328 mouse GSE18064 sample 875	1/237	0.879892	0.990368	0	0	0.471567	0.0603401	NBEA
Parkinson's disease DOID-14330 human GSE19587 sample 496	1/239	0.882033	0.990368	0	0	0.467556	0.0586902	PDZD2
Rift Valley fever DOID-1328 mouse GSE18064 sample 876	1/240	0.88309	0.990368	0	0	0.465576	0.0578843	MAN2A1
Sarcoidosis C0036202 human GSE2657 sample 12	2/413	0.88332	0.990368	0	0	0.539784	0.0669697	PDE4D;PDE4B
prostate cancer DOID-10283 human GSE55945 sample 835	1/241	0.884137	0.990368	0	0	0.463613	0.0570907	NEAT1
acute myocarditis DOID-3951 mouse GSE35182 sample 801	3/572	0.885149	0.990368	0	0	0.583419	0.0711766	GPM6A;PIP4K2A;SLC1A3
Niemann-Pick Type C DOID-14504 mouse GSE39621 sample 495	1/243	0.886204	0.990368	0	0	0.459734	0.0555398	NEAT1
Alpha-1 anti-trypsin deficiency C0221757 human GSE1122 sample 281	1/244	0.887223	0.990368	0	0	0.457819	0.054782	NEAT1
Niemann-Pick Type C disease DOID-14504 mouse GSE39621 sample 471	1/244	0.887223	0.990368	0	0	0.457819	0.054782	NEAT1
Alzheimer's disease DOID-10652 human GSE36980 sample 521	2/419	0.88821	0.990368	0	0	0.531853	0.0630495	ST18;RYR3
severe asthma 2841 human GSE43696 sample 467	1/247	0.890227	0.990368	0	0	0.452166	0.0525772	TENM2
Wolfram syndrome UMLS CUI-C0043207 mouse GSE15293 sample 695	1/250	0.893152	0.990368	0	0	0.44665	0.0504708	GRIK1
ulcerative colitis DOID-8577 human GSE38713 sample 810	1/250	0.893152	0.990368	0	0	0.44665	0.0504708	MALAT1
colon adenoma DOID-0050912 mouse GSE422 sample 650	2/427	0.894437	0.990368	0	0	0.521627	0.0581934	CADM1;SLC44A1
dermatomyositis DOID-10223 human GSE48280 sample 705	2/429	0.895942	0.990368	0	0	0.51913	0.0570417	PIP4K2A;PITPNC1
autism spectrum disorder DOID-0060041 human GSE25507 sample 1032	1/253	0.895999	0.990368	0	0	0.441265	0.0484579	MALAT1
prostate cancer DOID-10283 human GSE30174 sample 866	2/430	0.896688	0.990368	0	0	0.517891	0.0564748	PIP4K2A;MALAT1
type 2 diabetes mellitus DOID-9352 human GSE23343 sample 893	1/256	0.898771	0.990368	0	0	0.436007	0.0465338	KHDRBS2
acute myocardial infarction DOID-9408 mouse GSE775 sample 1005	2/434	0.89962	0.990368	0	0	0.512989	0.0542655	TCF4;SLC8A1
mental retardation DOID-1059 human GSE6575 sample 1044	2/435	0.900341	0.990368	0	0	0.511778	0.0537274	MEF2C;TCF4
peripartum cardiomyopathy DOID-9997 human GSE42955 sample 817	1/258	0.900578	0.990368	0	0	0.43257	0.0452982	KCNAB1
MS (Multiple Sclerosis) C0026769 mouse GSE842 sample 381	1/260	0.902353	0.990368	0	0	0.429186	0.0440988	SORBS1
thymic carcinoma DOID-3284 mouse GSE2501 sample 985	1/261	0.903228	0.990368	0	0	0.427513	0.0435124	FYN
Crohn's disease DOID-8778 human GSE3365 sample 794	1/261	0.903228	0.990368	0	0	0.427513	0.0435124	FYN
Neurological pain disorder C0423704 rat GSE2636 sample 129	1/262	0.904096	0.990368	0	0	0.425853	0.0429345	ADCY2
psoriasis DOID-8893 mouse GSE27628 sample 819	1/263	0.904956	0.990368	0	0	0.424206	0.0423651	FMNL2
amyotrophic lateral sclerosis DOID-332 mouse GSE10953 sample 681	1/263	0.904956	0.990368	0	0	0.424206	0.0423651	MALAT1
ulcerative colitis DOID-8577 human GSE11223 sample 588	1/264	0.905808	0.990368	0	0	0.422572	0.0418041	GRM7
tibial muscular dystrophy DOID-9884 human GSE42806 sample 539	1/265	0.906653	0.990368	0	0	0.42095	0.0412512	CADM2
Leukemia, Adult T Cell C0023493 human GSE10789 sample 351	1/265	0.906653	0.990368	0	0	0.42095	0.0412512	PRKCA
Colitis C0009319 mouse GSE2172 sample 401	1/266	0.90749	0.990368	0	0	0.41934	0.0407064	MACF1
systemic lupus erythematosus DOID-9074 human GSE55447 sample 1076	1/266	0.90749	0.990368	0	0	0.41934	0.0407064	OXR1
breast adenocarcinoma DOID-3458 human GSE61304 sample 1071	1/266	0.90749	0.990368	0	0	0.41934	0.0407064	NXPH1
Diabetic Neuropathy C0011882 mouse GSE11343 sample 7	1/267	0.90832	0.990368	0	0	0.417742	0.0401695	PHLPP1
endometrial cancer DOID-1380 human GSE17025 sample 844	1/269	0.909957	0.990368	0	0	0.414582	0.039119	NEAT1
colorectal adenocarcinoma DOID-0050861 mouse GSE31106 sample 1070	1/270	0.910765	0.990368	0	0	0.41302	0.0386052	MALAT1
multiple sclerosis DOID-2377 human GSE26484 sample 742	1/271	0.911565	0.990368	0	0	0.411469	0.0380987	MALAT1
ulcerative colitis DOID-8577 human GSE3365 sample 762	1/271	0.911565	0.990368	0	0	0.411469	0.0380987	FYN
esophagus squamous cell carcinoma DOID-3748 human GSE20347 sample 607	1/271	0.911565	0.990368	0	0	0.411469	0.0380987	CHRM3
endometrial cancer DOID-1380 human GSE17025 sample 841	1/272	0.912359	0.990368	0	0	0.40993	0.0375996	NEAT1
Ulcerative Colitis C0009324 human GSE3365 sample 188	1/272	0.912359	0.990368	0	0	0.40993	0.0375996	FYN
Androgen insensitivity syndrome C0039585 human GSE3871 sample 415	1/273	0.913145	0.990368	0	0	0.408402	0.0371076	NRXN3
prostate cancer DOID-10283 human GSE55945 sample 834	1/275	0.914697	0.990368	0	0	0.405379	0.0361447	NEAT1
autistic disorder DOID-12849 human GSE6575 sample 1042	2/457	0.915035	0.990368	0	0	0.48648	0.043196	KHDRBS2;FBXL7
cystic fibrosis DOID-1485 mouse GSE33319 sample 1048	1/276	0.915462	0.990368	0	0	0.403884	0.0356736	MAN2A1
Schizophrenia C0036341 human GSE12654 sample 226	1/276	0.915462	0.990368	0	0	0.403884	0.0356736	CNTNAP2
Type 1 diabetes mellitus C0011854 mouse GSE11 sample 173	1/279	0.917718	0.990368	0	0	0.399465	0.0343002	CADM1
basal cell carcinoma DOID-2513 mouse GSE58894 sample 730	1/280	0.918456	0.990368	0	0	0.398012	0.0338554	GRM7
Huntington's disease DOID-12858 mouse GSE26001 sample 719	1/281	0.919188	0.990368	0	0	0.396571	0.0334168	NEAT1
colon cancer DOID-219 mouse GSE63032 sample 662	1/283	0.920632	0.990368	0	0	0.393718	0.0325583	ADCY2
myelodysplastic syndrome DOID-0050908 human GSE19429 sample 750	1/283	0.920632	0.990368	0	0	0.393718	0.0325583	PCDH9
schizophrenia 5419 human GSE12654 sample 465	1/284	0.921345	0.990368	0	0	0.392306	0.0321381	CNTNAP2
Duchenne muscular dystrophy (DMD) C0013264 mouse GSE1472 sample 62	1/285	0.922051	0.990368	0	0	0.390905	0.0317238	MACF1
Leukemia, Chronic T-Cell C2363142 human GSE5788 sample 74	1/287	0.923444	0.990368	0	0	0.388132	0.0309127	AUTS2
nemaline myopathy DOID-3191 mouse GSE3384 sample 974	2/472	0.923867	0.990368	0	0	0.47059	0.0372649	MACF1;MEF2C
bipolar disorder DOID-3312 human GSE46449 sample 570	1/288	0.924132	0.990368	0	0	0.38676	0.0305156	TMTC2
COPD - Chronic obstructive pulmonary disease C0024117 human GSE475 sample 343	1/289	0.924813	0.990368	0	0	0.385397	0.0301241	MEF2C
Insulin Resistance DOID-9352 human GSE36297 sample 581	1/290	0.925488	0.990368	0	0	0.384044	0.0297381	MEF2C
cerebral palsy DOID-1969 human GSE31243 sample 503	1/291	0.926157	0.990368	0	0	0.3827	0.0293574	RYR3
cerebral palsy DOID-1969 human GSE31243 sample 877	1/291	0.926157	0.990368	0	0	0.3827	0.0293574	RYR3
Rotavirus infection of children C1442797 human GSE2729 sample 43	1/293	0.927477	0.990368	0	0	0.38004	0.028612	PDE4B
Cancer of prostate C0376358 mouse GSE1413 sample 48	1/294	0.928129	0.990368	0	0	0.378723	0.028247	NEAT1
Type 2 diabetes mellitus C0011860 mouse GSE642 sample 320	1/294	0.928129	0.990368	0	0	0.378723	0.028247	MAN2A1
Neurofibromatosis DOID-8712 mouse GSE1482 sample 669	1/295	0.928774	0.990368	0	0	0.377416	0.027887	CADM1
prostate cancer DOID-10283 human GSE3325 sample 990	1/296	0.929414	0.990368	0	0	0.376117	0.0275321	NEAT1
endometrial cancer DOID-1380 human GSE17025 sample 840	1/298	0.930677	0.990368	0	0	0.373546	0.0268369	TCF4
autism spectrum disorder DOID-0060041 human GSE62632 sample 1036	1/299	0.931299	0.990368	0	0	0.372273	0.0264964	NTM
pulmonary tuberculosis DOID-2957 mouse GSE48027 sample 832	2/486	0.931327	0.990368	0	0	0.456647	0.0324883	PCDH15;SLC1A2
pancreatic ductal adenocarcinoma DOID-3498 human GSE15471 sample 604	2/487	0.931832	0.990368	0	0	0.455682	0.0321723	TENM2;NTM
familial hypercholesterolemia DOID-13810 human GSE6054 sample 910	1/300	0.931917	0.990368	0	0	0.371009	0.0261606	MALAT1
hepatitis C DOID-1883 human GSE20948 sample 597	1/301	0.932528	0.990368	0	0	0.369754	0.0258295	MALAT1
Alzheimer's disease DOID-10652 human GSE36980 sample 522	1/301	0.932528	0.990368	0	0	0.369754	0.0258295	TRPM3
juvenile dermatomyositis UMLS CUI-C0263666 human GSE11971 sample 771	2/489	0.932833	0.990368	0	0	0.453764	0.0315497	MEF2C;TCF4
ulcerative colitis DOID-8577 human GSE11223 sample 591	1/302	0.933134	0.990368	0	0	0.368506	0.0255028	PTPRN2
endometrial cancer DOID-1380 human GSE17025 sample 846	1/302	0.933134	0.990368	0	0	0.368506	0.0255028	NEAT1
bronchopulmonary dysplasia UMLS CUI-C0006287 human GSE8586 sample 919	1/305	0.934921	0.990368	0	0	0.364814	0.0245496	SORBS1
skin squamous cell carcinoma DOID-3151 human GSE45164 sample 657	1/305	0.934921	0.990368	0	0	0.364814	0.0245496	MAN2A1
endometrial cancer DOID-1380 human GSE17025 sample 842	1/305	0.934921	0.990368	0	0	0.364814	0.0245496	NEAT1
systemic lupus erythematosus DOID-9074 human GSE61635 sample 816	1/306	0.935506	0.990368	0	0	0.363599	0.0242404	PTPRN2
Type 1 diabetes mellitus C0011854 mouse GSE11 sample 178	1/306	0.935506	0.990368	0	0	0.363599	0.0242404	KAZN
Osteolysis C0029435 human GSE755 sample 128	1/307	0.936085	0.990368	0	0	0.362392	0.0239355	CADM1
Alzheimer's disease DOID-10652 human GSE36980 sample 524	1/308	0.93666	0.990368	0	0	0.361193	0.0236347	MALAT1
asthma DOID-2841 human GSE31773 sample 715	1/308	0.93666	0.990368	0	0	0.361193	0.0236347	ZBTB20
Premature aging C0231341 human GSE10123 sample 55	1/308	0.93666	0.990368	0	0	0.361193	0.0236347	TCF4
Barrett's esophagus DOID-9206 human GSE34619 sample 453	1/309	0.937229	0.990368	0	0	0.360002	0.0233381	PRKCA
Huntington's disease DOID-12858 mouse GSE3621 sample 702	1/311	0.938352	0.990368	0	0	0.357643	0.0227567	CADPS
cystic fibrosis DOID-1485 mouse GSE769 sample 1058	1/312	0.938907	0.990368	0	0	0.356475	0.0224719	PLCB1
psoriasis DOID-8893 mouse GSE27628 sample 820	1/313	0.939456	0.990368	0	0	0.355314	0.0221909	ROBO2
Zaire ebolavirus DOID-4325 human GSE31747 sample 497	1/313	0.939456	0.990368	0	0	0.355314	0.0221909	DOCK4
Duchenne muscular dystrophy (DMD) C0013264 mouse GSE1026 sample 72	1/313	0.939456	0.990368	0	0	0.355314	0.0221909	MEF2C
familial hypercholesterolemia DOID-13810 human GSE6054 sample 909	1/315	0.94054	0.990368	0	0	0.353015	0.0216403	MALAT1
Type 2 diabetes mellitus C0011860 rat GSE3068 sample 335	1/315	0.94054	0.990368	0	0	0.353015	0.0216403	ADCY2
myotonic dystrophy type 1 DOID-11722 human GSE7177 sample 1053	1/316	0.941074	0.990368	0	0	0.351876	0.0213706	MALAT1
Wilson disease DOID-893 mouse GSE5348 sample 966	1/316	0.941074	0.990368	0	0	0.351876	0.0213706	NEAT1
Osteoarthritis C0029408 human GSE16464 sample 199	1/317	0.941604	0.990368	0	0	0.350744	0.0211044	NEAT1
Diabetes and Obesity DOID-9970 mouse GSE54917 sample 807	1/318	0.942129	0.990368	0	0	0.34962	0.0208418	NEAT1
endometrial cancer DOID-1380 human GSE17025 sample 838	1/318	0.942129	0.990368	0	0	0.34962	0.0208418	NEAT1
cystic fibrosis DOID-1485 mouse GSE3100 sample 1055	1/319	0.94265	0.990368	0	0	0.348503	0.0205828	FMNL2
Dermatomyositis C0011633 human GSE5370 sample 334	1/320	0.943165	0.990368	0	0	0.347392	0.0203272	RBFOX1
endometriosis of ovary DOID-11432 human GSE7305 sample 939	1/321	0.943677	0.990368	0	0	0.346289	0.020075	MALAT1
familial hypercholesterolemia DOID-13810 human GSE6088 sample 907	1/321	0.943677	0.990368	0	0	0.346289	0.020075	PDE4B
myotonic dystrophy type 1 DOID-11722 human GSE7178 sample 1051	1/321	0.943677	0.990368	0	0	0.346289	0.020075	CNTNAP2
Tendonopathy 971 human GSE26051 sample 470	1/322	0.944183	0.990368	0	0	0.345193	0.0198262	MALAT1
Osteoporosis C0029456 human GSE2208 sample 163	1/323	0.944685	0.990368	0	0	0.344103	0.0195807	PDE4B
Teratospermia UMLS CUI-C0919628 human GSE6968 sample 954	1/324	0.945183	0.990368	0	0	0.34302	0.0193384	AGBL4
Cystic Fibrosis C0010674 mouse GSE769 sample 428	1/325	0.945676	0.990368	0	0	0.341944	0.0190994	PLCB1
myelodysplastic syndrome DOID-0050908 human GSE19429 sample 748	1/327	0.946649	0.990368	0	0	0.339811	0.0186308	PIP4K2A
Synovial sarcoma C0039101 mouse GSE6461 sample 22	1/327	0.946649	0.990368	0	0	0.339811	0.0186308	CADM1
Carcinoma in situ of large intestine C0686087 human GSE4183 sample 190	1/327	0.946649	0.990368	0	0	0.339811	0.0186308	MAN2A1
endometrial cancer DOID-1380 human GSE17025 sample 845	1/327	0.946649	0.990368	0	0	0.339811	0.0186308	NEAT1
Duchenne muscular dystrophy (DMD) C0013264 mouse GSE1472 sample 410	1/329	0.947605	0.990368	0	0	0.337704	0.0181746	MACF1
Endometriosis C0014175 human GSE7305 sample 149	1/330	0.948076	0.990368	0	0	0.336661	0.017951	MALAT1
atopic dermatitis skin DOID-3310 human GSE32924 sample 630	1/331	0.948543	0.990368	0	0	0.335623	0.0177303	MALAT1
Type 2 diabetes mellitus C0011860 rat GSE2470 sample 238	1/332	0.949006	0.990368	0	0	0.334592	0.0175125	RYR2
Duchenne muscular dystrophy (DMD) C0013264 mouse GSE466 sample 328	1/332	0.949006	0.990368	0	0	0.334592	0.0175125	MACF1
idiopathic pulmonary fibrosis DOID-0050156 human GSE24206 sample 872	1/333	0.949465	0.990368	0	0	0.333567	0.0172976	ROBO2
Duchenne muscular dystrophy (DMD) C0013264 mouse GSE1008 sample 298	1/333	0.949465	0.990368	0	0	0.333567	0.0172976	MEF2C
Purpura, Idiopathic Thrombocytopenic C0043117 human GSE574 sample 358	2/531	0.950908	0.990368	0	0	0.41683	0.0209822	MACF1;FYN
asthma DOID-2841 human GSE27011 sample 567	1/337	0.95126	0.990368	0	0	0.329529	0.0164658	PLCB1
Crohn's disease DOID-8778 human GSE6731 sample 758	1/337	0.95126	0.990368	0	0	0.329529	0.0164658	PDE4B
inflammatory bowel disease DOID-0050589 human GSE4183 sample 551	1/337	0.95126	0.990368	0	0	0.329529	0.0164658	NEAT1
AML - Acute myeloid leukemia C0023467 human GSE2191 sample 112	1/339	0.952133	0.990368	0	0	0.327545	0.0160661	PDE4B
pulmonary sarcoidosis DOID-13406 human GSE19976 sample 764	1/339	0.952133	0.990368	0	0	0.327545	0.0160661	SLC1A3
Hypotensive episode C0520541 rat GSE2401 sample 388	1/339	0.952133	0.990368	0	0	0.327545	0.0160661	MACF1
HIV - Human immunodeficiency virus infection C0019693 human GSE6740 sample 419	1/340	0.952564	0.990368	0	0	0.326562	0.0158701	FYN
Malignant Melanoma C0025202 human GSE4587 sample 326	1/342	0.953415	0.990368	0	0	0.324613	0.0154858	MALAT1
colitis DOID-0060180 mouse GSE34874 sample 800	1/345	0.954662	0.990368	0	0	0.321733	0.0149278	FMNL2
ulcerative colitis DOID-8577 human GSE11223 sample 586	1/348	0.955876	0.990368	0	0	0.318902	0.0143913	KAZN
ulcerative colitis DOID-8577 human GSE11223 sample 589	1/348	0.955876	0.990368	0	0	0.318902	0.0143913	LHFPL3
Fracture of femur C0015802 rat GSE1371 sample 278	1/351	0.957057	0.990368	0	0	0.31612	0.0138752	FYN
colorectal cancer DOID-9256 human GSE1323 sample 763	1/351	0.957057	0.990368	0	0	0.31612	0.0138752	FYN
pancreatic invasive intraductal papillary-mucinous carcinoma DOID-8150 human GSE19650 sample 610	1/352	0.957444	0.990368	0	0	0.315203	0.0137076	NEAT1
autism spectrum disorder DOID-0060041 human GSE25507 sample 1024	1/353	0.957827	0.990368	0	0	0.314292	0.0135421	MALAT1
Type 2 diabetes mellitus C0011860 mouse GSE2899 sample 299	1/355	0.958584	0.990368	0	0	0.312484	0.0132176	MAN2A1
systemic lupus erythematosus DOID-9074 human GSE13887 sample 450	1/357	0.959327	0.990368	0	0	0.310697	0.0129013	PDE4B
Anxiety Disorder C0003469 rat GSE932 sample 111	1/358	0.959693	0.990368	0	0	0.30981	0.0127461	OPCML
Pompe disease, infantile-onset form UMLS CUI-C0342751 human GSE38680 sample 870	1/358	0.959693	0.990368	0	0	0.30981	0.0127461	RYR3
non-systemic juvenile idiopathic arthritis (sJIA) (subgroup-RF+ polyarthritis) DOID-848 human GSE21521 sample 579	1/359	0.960056	0.990368	0	0	0.308929	0.012593	CNTNAP2
Influenza C0021400 mouse GSE3203 sample 85	1/359	0.960056	0.990368	0	0	0.308929	0.012593	TCF4
systemic juvenile idiopathic arthritis (sJIA) (subgroup-extended oligo) DOID-848 human GSE21521 sample 576	1/360	0.960416	0.990368	0	0	0.308053	0.0124418	PCDH9
systemic lupus erythematosus DOID-9074 human GSE10325 sample 693	1/360	0.960416	0.990368	0	0	0.308053	0.0124418	PIP4K2A
ulcerative colitis DOID-8577 human GSE9452 sample 924	1/361	0.960773	0.990368	0	0	0.307181	0.0122925	MALAT1
nemaline myopathy DOID-3191 mouse GSE3384 sample 975	1/361	0.960773	0.990368	0	0	0.307181	0.0122925	MEF2C
Muscular Dystrophy C0026850 mouse GSE3252 sample 158	1/362	0.961127	0.990368	0	0	0.306315	0.0121451	MAN2A1
Carcinoma, Hepatocellular C0019204 mouse GSE4612 sample 315	1/363	0.961477	0.990368	0	0	0.305453	0.0119996	NEAT1
Cardiac Hypertrophy C1383860 mouse GSE5500 sample 5	1/365	0.962168	0.990368	0	0	0.303743	0.0117142	NXPH1
Nemaline Myopathy C0206157 mouse GSE3384 sample 78	1/366	0.962509	0.990368	0	0	0.302895	0.0115741	ZBTB20
systemic juvenile idiopathic arthritis (sJIA) DOID-848 human GSE21521 sample 574	1/367	0.962847	0.990368	0	0	0.302052	0.0114359	SLC1A3
Dermatomyositis C0011633 human GSE1551 sample 130	1/368	0.963182	0.990368	0	0	0.301214	0.0112994	RBFOX1
sickle cell anemia DOID-10923 human GSE11524 sample 481	1/371	0.964169	0.990368	0	0	0.298725	0.0109001	MAP2
Acute Lung Injury C0242488 mouse GSE1871 sample 152	1/372	0.964492	0.990368	0	0	0.297905	0.0107704	FMNL2
pancreatic ductal adenocarcinoma DOID-3498 mouse GSE61412 sample 698	1/377	0.966064	0.990368	0	0	0.293868	0.0101457	PCDH7
nemaline myopathy DOID-3191 mouse GSE3384 sample 977	1/379	0.966674	0.990368	0	0	0.292283	0.00990666	MACF1
cellular phase chronic idiopathic myelofibrosis 8106 human GSE3410 sample 460	1/382	0.967568	0.990368	0	0	0.289937	0.00955919	MACF1
Bacterial Infection C0004623 human GSE3026 sample 322	1/385	0.968438	0.990368	0	0	0.287627	0.00922456	MACF1
Meningococcal infection C0025303 human GSE4646 sample 347	1/387	0.969005	0.990368	0	0	0.286108	0.00900835	MAP4K4
nemaline myopathy DOID-3191 mouse GSE3384 sample 970	1/390	0.969836	0.990368	0	0	0.283857	0.008694	MACF1
Tachycardia C0039231 rat GSE7999 sample 244	1/392	0.970378	0.990368	0	0	0.282376	0.00849087	MACF1
Waldenstrom Macroglobulinemia UMLS CUI-C0024419 human GSE6691 sample 785	1/393	0.970646	0.990368	0	0	0.281641	0.00839118	ZNF804A
Malignant tumor of pancreas C0346647 human GSE14245 sample 242	1/395	0.971173	0.990368	0	0	0.280183	0.00819548	PCDH9
Type 1 diabetes mellitus C0011854 mouse GSE2254 sample 204	1/400	0.972451	0.990368	0	0	0.276601	0.00772694	MAN2A1
breast cancer DOID-1612 human GSE14943 sample 504	1/403	0.973191	0.990368	0	0	0.274494	0.0074594	DOCK4
Hepatitis C infection C0019196 human GSE2067 sample 309	1/403	0.973191	0.990368	0	0	0.274494	0.0074594	MAP4K4
Retinoschisis C0152439 mouse GSE5581 sample 146	1/404	0.973433	0.990368	0	0	0.273799	0.0073724	NBEA
Carcinoma in situ of small intestine C0686083 mouse GSE422 sample 119	1/408	0.97438	0.990368	0	0	0.271052	0.0070349	MACF1
Acute pancreatitis C0001339 mouse GSE3644 sample 376	1/412	0.975293	0.990368	0	0	0.268359	0.00671356	NEAT1
Infertility due to azoospermia C1321542 mouse GSE3676 sample 151	1/413	0.975516	0.990368	0	0	0.267694	0.00663566	MACF1
ulcerative colitis DOID-8577 human GSE9452 sample 454	1/413	0.975516	0.990368	0	0	0.267694	0.00663566	MALAT1
progressive myoclonus epilepsy DOID-891 mouse GSE47516 sample 517	1/415	0.975957	0.990368	0	0	0.266373	0.00648268	GRM5
Psoriasis vulgaris C0263361 human GSE13355 sample 35	1/418	0.976603	0.990368	0	0	0.264416	0.00626009	TENM2
colon carcinoma DOID-1520 mouse GSE422 sample 651	1/421	0.977232	0.990368	0	0	0.262486	0.00604549	MACF1
amyotrophic lateral sclerosis DOID-332 mouse GSE10953 sample 680	1/423	0.977641	0.990368	0	0	0.261216	0.00590671	NBEA
Essential Thrombocytemia C0040028 human GSE2006 sample 434	1/426	0.978242	0.990368	0	0	0.259332	0.00570475	PIP4K2A
H1N1 DOID-0050211 human GSE27131 sample 514	1/427	0.978439	0.990368	0	0	0.258709	0.00563904	SLC44A1
sickle-cell anemia DOID-10923 human GSE16728 sample 505	1/429	0.978827	0.990368	0	0	0.257474	0.00550999	PIP4K2A
Huntington's disease DOID-12858 mouse GSE26001 sample 720	1/436	0.980132	0.990368	0	0	0.253239	0.00508206	MALAT1
sickle-cell anemia DOID-10923 human GSE16728 sample 506	1/452	0.982821	0.990368	0	0	0.244054	0.00422895	PIP4K2A
hepatitis C virus related hepatocellular carcinoma UMLS CUI-C1333978 human GSE58208 sample 736	1/453	0.982977	0.990368	0	0	0.243501	0.00418084	RNF220
hepatocellular carcinoma DOID-684 human GSE58208 sample 735	1/455	0.983284	0.990368	0	0	0.242403	0.00408633	PDE4B
Nemaline Myopathy C0206157 mouse GSE3384 sample 317	1/466	0.984876	0.990368	0	0	0.236535	0.00360475	MACF1
Septic Shock C0036983 human GSE9692 sample 307	1/494	0.98828	0.990497	0	0	0.222778	0.00262641	MCTP1
juvenile dermatomyositis UMLS CUI-C0263666 human GSE11971 sample 772	1/503	0.989203	0.990497	0	0	0.218682	0.00237395	MEF2C
autistic disorder DOID-12849 human GSE6575 sample 1043	1/517	0.990497	0.990497	0	0	0.212595	0.00202989	PHACTR1

## Sheet: Jensen TISSUES
Term	Overlap	P-value	Adjusted P-value	Old P-value	Old Adjusted P-value	Odds Ratio	Combined Score	Genes
Occipital lobe	143/10045	2.55183e-17	4.71059e-15	0	0	4.21395	161.003	CHRM3;ATP8A2;MAML2;MYT1L;DGKB;FRMPD4;CTNND2;ZBTB20;MSI2;SLC8A1;RIMS2;FAM19A2;TNR;PIP4K2A;THSD7A;RGS6;ANKS1B;RGS7;MEF2C;RBFOX1;DSCAM;MTUS2;KAZN;PRKCA;UNC5D;ANK3;KIAA1217;WBSCR17;KCNQ3;KCNQ5;ASTN2;KCTD16;GRIA1;GPM6A;GRIA2;MACF1;KHDRBS2;KHDRBS3;SLC1A2;CACNA1A;TMTC2;SLC1A3;RASAL2;CACNA1C;NPAS3;DPP6;PDZD2;CDH20;SNTG1;MAP2;MAN2A1;NXPH1;LRRC4C;GRIA4;TMEM132D;DTNA;PTPRN2;AUTS2;SYT1;CADM1;CADM2;NEBL;SLC4A…
Frontal lobe	154/11591	3.03909e-17	4.71059e-15	0	0	4.90948	186.719	CHRM3;ATP8A2;MAML2;DGKB;FRMPD4;CTNND2;ZBTB20;MSI2;ADARB2;SLC8A1;RIMS2;GRIP1;FAM19A2;TNR;PIP4K2A;THSD7A;MACROD2;RGS6;ANKS1B;RGS7;MEF2C;RBFOX1;DSCAM;MTUS2;KAZN;FRMD4A;PRKCA;UNC5D;ANK3;GABRG3;KIAA1217;PARD3;KCNQ3;KCNQ5;ASTN2;KCTD16;GRIA1;GPM6A;GRIA2;MACF1;KHDRBS2;KHDRBS3;PCDH15;SLC1A2;CACNA1A;TMTC2;SLC1A3;RASAL2;CACNA1C;NPAS3;DPP6;PDZD2;CDH20;SNTG1;MAP2;MAN2A1;NXPH1;LRRC4C;TRPM3;GRIA4;TMEM132D;DTNA;…
Hypothalamus	162/12937	7.56092e-17	7.81295e-15	0	0	5.95839	221.181	CHRM3;ATP8A2;MAML2;MYT1L;DGKB;FRMPD4;CTNND2;ZBTB20;MSI2;ADARB2;SLC8A1;HS6ST3;GRIP1;FAM19A2;TNR;PIP4K2A;THSD7A;MACROD2;RGS6;ANKS1B;RGS7;CALN1;MEF2C;RBFOX1;DSCAM;ARL15;MTUS2;KAZN;FRMD4A;PRKCA;UNC5D;ANK3;GABRG3;KIAA1217;WBSCR17;KCNQ3;KCNQ5;ASTN2;KCTD16;GRIA1;GPM6A;GRIA2;MACF1;KHDRBS2;KHDRBS3;PCDH15;GLIS3;SLC1A2;CACNA1A;TMTC2;SLC1A3;RASAL2;CACNA1C;NPAS3;DPP6;PDZD2;CDH20;SNTG1;MAP2;MAN2A1;NXPH1;LRRC4C…
Parietal lobe	139/9921	1.69852e-15	1.31635e-13	0	0	3.75475	127.695	CHRM3;ATP8A2;MAML2;MYT1L;DGKB;FRMPD4;CTNND2;ZBTB20;MSI2;SLC8A1;FAM19A2;TNR;PIP4K2A;THSD7A;RGS6;ANKS1B;RGS7;MEF2C;RBFOX1;DSCAM;KAZN;PRKCA;UNC5D;ANK3;KIAA1217;WBSCR17;KCNQ3;KCNQ5;KCTD16;GRIA1;GPM6A;GRIA2;MACF1;KHDRBS2;KHDRBS3;SLC1A2;CACNA1A;SLC1A3;RASAL2;CACNA1C;NPAS3;DPP6;PDZD2;CDH20;SNTG1;MAP2;MAN2A1;NXPH1;LRRC4C;GRIA4;TMEM132D;DTNA;PTPRN2;SYT1;CADM1;CADM2;NEBL;SLC4A10;GRIN2B;LRP1B;ST18;QKI;PTPRD…
Brain	160/13237	4.41792e-14	2.73911e-12	0	0	4.85522	149.301	CHRM3;ATP8A2;MYT1L;DGKB;FRMPD4;CTNND2;ZBTB20;MSI2;ADARB2;SLC8A1;HS6ST3;RIMS2;GRIP1;FAM19A2;TNR;PIP4K2A;THSD7A;MACROD2;RGS6;ANKS1B;RGS7;CALN1;MEF2C;RBFOX1;DSCAM;ARL15;MTUS2;KAZN;FRMD4A;PRKCA;UNC5D;ANK3;KIAA1217;WBSCR17;PARD3;KCNQ3;KCNQ5;ASTN2;KCTD16;GRIA1;GPM6A;GRIA2;MACF1;KHDRBS2;KHDRBS3;PCDH15;GLIS3;SLC1A2;CACNA1A;TMTC2;SLC1A3;RASAL2;CACNA1C;NPAS3;DPP6;PDZD2;CDH20;SNTG1;MAP2;MAN2A1;NXPH1;LRRC4C;…
Temporal lobe	118/8425	3.31643e-11	1.71349e-09	0	0	2.7726	66.9016	CHRM3;ATP8A2;MAML2;DGKB;FRMPD4;CTNND2;MSI2;SLC8A1;FAM19A2;TNR;PIP4K2A;THSD7A;ANKS1B;RGS7;MEF2C;KAZN;PRKCA;UNC5D;ANK3;KIAA1217;KCNQ3;KCNQ5;GRIA1;GPM6A;GRIA2;MACF1;KHDRBS2;KHDRBS3;SLC1A2;CACNA1A;SLC1A3;RASAL2;CACNA1C;DPP6;PDZD2;CDH20;SNTG1;MAP2;MAN2A1;NXPH1;LRRC4C;GRIA4;TMEM132D;DTNA;PTPRN2;SYT1;CADM1;CADM2;NEBL;SLC4A10;GRIN2B;LRP1B;ST18;QKI;PTPRD;RALYL;DLG2;DAB1;FGF14;NBEA;TCF4;CNTN4;FGF12;RNF220;…
Cerebral cortex	165/15695	6.91404e-08	3.06193e-06	0	0	3.80095	62.6667	CHRM3;ATP8A2;MAML2;MYT1L;DGKB;FRMPD4;CTNND2;ZBTB20;MSI2;ADARB2;SLC8A1;HS6ST3;RIMS2;GRIP1;FAM19A2;TNR;PIP4K2A;THSD7A;MACROD2;RGS6;ANKS1B;RGS7;CALN1;MEF2C;RBFOX1;DSCAM;ARL15;MTUS2;KAZN;FRMD4A;PRKCA;UNC5D;ANK3;GABRG3;KIAA1217;WBSCR17;PARD3;KCNQ3;KCNQ5;ASTN2;KCTD16;GRIA1;GPM6A;GRIA2;MACF1;KHDRBS2;KHDRBS3;PCDH15;GLIS3;SLC1A2;CACNA1A;TMTC2;SLC1A3;RASAL2;CACNA1C;NPAS3;DPP6;PDZD2;CDH20;SNTG1;MAP2;MAN2A1;…
Retina	132/11092	9.93848e-08	3.85116e-06	0	0	2.37209	38.2483	CHRM3;ATP8A2;FRMPD4;CTNND2;ZBTB20;MSI2;SLC8A1;RIMS2;GRIP1;TNR;PIP4K2A;THSD7A;MACROD2;RGS6;ANKS1B;RGS7;MEF2C;RBFOX1;DSCAM;KAZN;FRMD4A;PRKCA;UNC5D;ANK3;KIAA1217;PARD3;ASTN2;KCTD16;GRIA1;GPM6A;GRIA2;MACF1;KHDRBS2;KHDRBS3;PCDH15;SLC1A2;CACNA1A;SLC1A3;RASAL2;NPAS3;DPP6;PDZD2;CDH20;MAP2;MAN2A1;LRRC4C;TRPM3;GRIA4;DTNA;PTPRN2;AUTS2;SYT1;CADM1;CADM2;NEBL;SLC4A10;LRP1B;ST18;QKI;PTPRD;RALYL;DLG2;DAB1;FGF14;…
Amygdala	79/5279	1.15459e-07	3.97693e-06	0	0	2.26691	36.2124	DPP10;CNTNAP2;DOCK4;ATP8A2;MCTP1;SLC44A1;MYT1L;DGKB;CTNND2;ZBTB20;PITPNC1;RIMS2;GRM5;PDE4B;PIP4K2A;PHACTR1;ERC2;RGS6;RGS7;CALN1;MEF2C;RBFOX1;DST;KAZN;PRKCA;KCNAB1;ANK3;WBSCR17;LRRC7;PLCB1;GRIA1;GPM6A;GRIA2;MACF1;KHDRBS2;NLGN1;KHDRBS3;PHLPP1;NRXN1;SLC1A2;CACNA1A;SLC1A3;ADCY2;NPAS3;FSTL5;DPP6;PDZD2;ERBB4;GPC5;FYN;CTNNA2;CSMD3;LRRC4C;MAP4K4;OPCML;WWOX;PTPRN2;AUTS2;SYT1;CADM1;PCDH9;NEBL;ATRNL1;LSAMP;…
Medulla oblongata	71/4544	1.50436e-07	4.66351e-06	0	0	2.29859	36.1103	DPP10;DOCK4;ATP8A2;MCTP1;SLC44A1;MYT1L;DGKB;CTNND2;ZBTB20;RIMS2;PDE4B;PIP4K2A;PHACTR1;ERC2;RGS6;RGS7;MEF2C;RBFOX1;DST;KAZN;PRKCA;KCNAB1;ANK3;WBSCR17;LRRC7;PLCB1;GRIA1;GPM6A;GRIA2;MACF1;KHDRBS2;NLGN1;KHDRBS3;PHLPP1;NRXN1;SLC1A2;CACNA1A;SLC1A3;FSTL5;DPP6;PDZD2;MAN2A1;GPC5;CTNNA3;FYN;CTNNA2;CSMD3;LRRC4C;MAP4K4;OPCML;PTPRN2;AUTS2;SYT1;CADM1;PCDH9;NEBL;ATRNL1;LSAMP;SORBS1;ST18;QKI;PTPRD;RALYL;DAB1;FMN…
Cingulate cortex	73/4839	3.80073e-07	1.07112e-05	0	0	2.21755	32.7819	DPP10;CNTNAP2;DOCK4;ATP8A2;MCTP1;MYT1L;CTNND2;ZBTB20;GRIK1;PITPNC1;RIMS2;PDE4B;PIP4K2A;PHACTR1;ERC2;RGS6;RGS7;MEF2C;RBFOX1;DST;KAZN;PRKCA;ANK3;WBSCR17;LRRC7;PLCB1;GRIA1;GPM6A;GRIA2;MACF1;KHDRBS2;NLGN1;KHDRBS3;PHLPP1;NRXN1;NRXN3;CACNA1A;SLC1A3;ADCY2;FSTL5;DPP6;PDZD2;MAN2A1;GPC5;CTNNA3;FYN;CTNNA2;CSMD3;LRRC4C;MAP4K4;OPCML;PTPRN2;AUTS2;SYT1;CADM1;PCDH9;NEBL;ATRNL1;LSAMP;SORBS1;OXR1;ST18;QKI;PTPRD;RA…
Prefrontal cortex	81/5632	4.20552e-07	1.08643e-05	0	0	2.16934	31.8496	CHRM3;RYR2;CNTNAP2;DOCK4;ATP8A2;MCTP1;SLC44A1;MYT1L;DGKB;CTNND2;ZBTB20;GRIK2;PITPNC1;RIMS2;GRM5;PDE4B;PIP4K2A;PHACTR1;ERC2;RGS6;RGS7;MEF2C;RBFOX1;DST;KAZN;PRKCA;KCNAB1;ANK3;WBSCR17;LRRC7;PLCB1;GRIA1;GPM6A;GRIA2;MACF1;KHDRBS2;NLGN1;KHDRBS3;PHLPP1;NRXN1;SLC1A2;CACNA1A;SLC1A3;ADCY2;NPAS3;FSTL5;DPP6;PDZD2;MAN2A1;ERBB4;GPC5;FYN;CTNNA2;CSMD3;LRRC4C;MAP4K4;OPCML;DTNA;PTPRN2;AUTS2;SYT1;CADM1;PCDH9;NEBL;A…
Corpus callosum	112/9077	1.15271e-06	2.74876e-05	0	0	2.08691	28.5352	CHRM3;ATP8A2;MAML2;DGKB;CTNND2;ZBTB20;MSI2;ADARB2;SLC8A1;TNR;PIP4K2A;ANKS1B;RGS7;MEF2C;DSCAM;KAZN;PRKCA;UNC5D;ANK3;KCNQ3;KCNQ5;ASTN2;GRIA1;GPM6A;GRIA2;MACF1;KHDRBS2;KHDRBS3;SLC1A2;CACNA1A;TMTC2;SLC1A3;RASAL2;CACNA1C;NPAS3;DPP6;PDZD2;CDH20;MAP2;MAN2A1;NXPH1;LRRC4C;TRPM3;GRIA4;DTNA;PTPRN2;AUTS2;SYT1;CADM1;CADM2;NEBL;SLC4A10;GRIN2B;LRP1B;ST18;QKI;PTPRD;RALYL;DLG2;NBEA;TCF4;FGF12;FBXL7;RNF220;DPP10;R…
Caudate nucleus	68/4512	1.33745e-06	2.96149e-05	0	0	2.15892	29.1988	DPP10;RYR2;DOCK4;ATP8A2;MCTP1;SLC44A1;MYT1L;DGKB;CTNND2;PITPNC1;PDE4B;PIP4K2A;PHACTR1;RGS6;RGS7;RBFOX1;DST;KAZN;PRKCA;KCNAB1;ANK3;WBSCR17;LRRC7;PLCB1;GRIA1;GPM6A;GRIA2;MACF1;KHDRBS2;NLGN1;KHDRBS3;PHLPP1;CACNA1A;SLC1A3;ADCY2;FSTL5;DPP6;PDZD2;ERBB4;GPC5;FYN;CTNNA2;CSMD3;LRRC4C;MAP4K4;OPCML;PTPRN2;AUTS2;SYT1;CADM1;PCDH9;NEBL;ATRNL1;LSAMP;SORBS1;ST18;QKI;PTPRD;SDK1;RALYL;DAB1;FMNL2;NBEA;PPP2R2B;TCF4;…
Subthalamic nucleus	66/4383	2.20466e-06	4.55629e-05	0	0	2.13569	27.8173	DPP10;CNTNAP2;DOCK4;ATP8A2;MCTP1;MYT1L;CTNND2;ZBTB20;RIMS2;PDE4B;PIP4K2A;PHACTR1;ERC2;RGS6;RGS7;MEF2C;RBFOX1;DST;KAZN;PRKCA;ANK3;WBSCR17;LRRC7;PLCB1;GRIA1;GPM6A;GRIA2;MACF1;KHDRBS2;NLGN1;KHDRBS3;NRXN1;SLC1A2;CACNA1A;SLC1A3;FSTL5;DPP6;PDZD2;MAP2;GPC5;FYN;CTNNA2;CSMD3;LRRC4C;MAP4K4;OPCML;PTPRN2;SYT1;CADM1;PCDH9;NEBL;ATRNL1;LSAMP;SORBS1;OXR1;QKI;PTPRD;RALYL;DAB1;FMNL2;NBEA;PPP2R2B;TCF4;GALNTL6;CNTN4…
Scolopidium	6/46	3.08189e-06	5.97116e-05	0	0	17.3535	220.215	GRIA1;SLC1A2;GRIK1;GRIK2;RGS7;GRIA4
Globus pallidus	56/3792	3.53614e-05	0.000644825	0	0	1.99283	20.4263	DPP10;ATP8A2;MCTP1;MYT1L;CTNND2;ZBTB20;PDE4B;PIP4K2A;PHACTR1;ERC2;RGS6;RGS7;MEF2C;RBFOX1;DST;KAZN;ANK3;WBSCR17;LRRC7;PLCB1;GRIA1;GPM6A;GRIA2;MACF1;KHDRBS2;NLGN1;KHDRBS3;NRXN1;CACNA1A;SLC1A3;FSTL5;GPC5;FYN;CTNNA2;CSMD3;LRRC4C;MAP4K4;OPCML;PTPRN2;SYT1;CADM1;PCDH9;NEBL;ATRNL1;LSAMP;OXR1;QKI;RALYL;DAB1;FMNL2;NBEA;PPP2R2B;TCF4;GALNTL6;CNTN4;FBXL7
HEK-293 cell	4/22	3.82911e-05	0.000659457	0	0	25.4399	258.732	RYR2;GRIK2;GRIN2B;TRPM3
Cerebellum	153/14879	6.57844e-05	0.00107332	0	0	2.20653	21.247	CHRM3;ATP8A2;MAML2;MYT1L;FRMPD4;CTNND2;ZBTB20;MSI2;ADARB2;SLC8A1;HS6ST3;RIMS2;GRIP1;FAM19A2;TNR;PIP4K2A;MACROD2;RGS6;ANKS1B;RGS7;CALN1;MEF2C;DSCAM;ARL15;MTUS2;KAZN;FRMD4A;PRKCA;UNC5D;ANK3;GABRG3;KIAA1217;WBSCR17;PARD3;KCNQ3;KCNQ5;ASTN2;KCTD16;GRIA1;GPM6A;GRIA2;MACF1;KHDRBS2;KHDRBS3;GLIS3;SLC1A2;CACNA1A;TMTC2;SLC1A3;RASAL2;CACNA1C;NPAS3;DPP6;PDZD2;CDH20;MAP2;MAN2A1;NXPH1;LRRC4C;TRPM3;GRIA4;TMEM132…
Ganglion	11/323	0.000148632	0.00230379	0	0	4.1439	36.5245	GRIA1;GRIA2;GRM5;GRM7;MAP2;SLC1A2;SLC1A3;GRIK1;GRIK2;GRIN2B;GRIA4
Pons	59/4336	0.000217087	0.00320462	0	0	1.8174	15.3301	DPP10;DOCK4;ATP8A2;MCTP1;MYT1L;DGKB;CTNND2;ZBTB20;GRIK1;PDE4B;PIP4K2A;PHACTR1;ERC2;RGS6;RGS7;MEF2C;RBFOX1;DST;KAZN;ANK3;LRRC7;PLCB1;GRIA1;GPM6A;GRIA2;MACF1;KHDRBS2;NLGN1;KHDRBS3;NRXN1;SLC1A2;CACNA1A;SLC1A3;FSTL5;GPC5;CTNNA3;FYN;CTNNA2;CSMD3;LRRC4C;MAP4K4;OPCML;SYT1;CADM1;PCDH9;NEBL;ATRNL1;LSAMP;SORBS1;QKI;PTPRD;DAB1;FMNL2;NBEA;PPP2R2B;TCF4;GALNTL6;CNTN4;FBXL7
Embryonic brain	65/4936	0.000229411	0.00323261	0	0	1.78146	14.9286	DPP10;ROBO2;DOCK4;ATP8A2;MCTP1;MYT1L;CTNND2;GRIK2;PITPNC1;GRM5;PDE4B;PIP4K2A;PHACTR1;ERC2;RGS6;RGS7;MEF2C;RBFOX1;DST;KAZN;PRKCA;ANK3;LRRC7;PLCB1;GRIA1;GPM6A;GRIA2;MACF1;KHDRBS2;NLGN1;KHDRBS3;NRXN1;CACNA1A;SLC1A3;NPAS3;FSTL5;PDZD2;ERBB4;GPC5;FYN;CTNNA2;CSMD3;LRRC4C;MAP4K4;OPCML;PTPRN2;AUTS2;SYT1;CADM1;PCDH9;NEBL;ATRNL1;LSAMP;SORBS1;QKI;PTPRD;RALYL;DAB1;FMNL2;NBEA;PPP2R2B;TCF4;GALNTL6;CNTN4;FBXL7
Thalamus	64/4856	0.000258448	0.00348343	0	0	1.77653	14.6756	DPP10;DOCK4;ATP8A2;MCTP1;SLC44A1;MYT1L;CTNND2;GRIK1;PITPNC1;RIMS2;PDE4B;PIP4K2A;PHACTR1;RGS6;RGS7;RBFOX1;DST;KAZN;ANK3;WBSCR17;LRRC7;PLCB1;GPM6A;GRIA2;MACF1;KHDRBS2;NLGN1;KHDRBS3;PHLPP1;NRXN1;CACNA1A;SLC1A3;NPAS3;FSTL5;DPP6;GPC5;FYN;CTNNA2;CSMD3;LRRC4C;MAP4K4;OPCML;PTPRN2;AUTS2;SYT1;CADM1;PCDH9;NEBL;ATRNL1;LSAMP;SORBS1;ST18;QKI;PTPRD;SDK1;RALYL;DAB1;FMNL2;NBEA;PPP2R2B;TCF4;GALNTL6;CNTN4;FBXL7
BTO:0000964	9/247	0.000365574	0.00472199	0	0	4.40839	34.8882	GRIA1;KCND2;KCNQ3;SLC1A2;SLC1A3;KCNAB1;GRIK2;GRIN2B;SLC8A1
Peripheral nerve	7/157	0.000505118	0.00626347	0	0	5.40043	40.9932	GRIA1;ROBO2;SLC1A2;MALAT1;GRIK1;RGS7;GRIA4
Spike	5/86	0.00100175	0.0119439	0	0	7.08513	48.93	GRM5;KCND2;KCNQ3;CACNA1A;GRIN2B
Cerebral peduncle	62/4907	0.0010948	0.0125699	0	0	1.66669	11.3621	DPP10;ATP8A2;MCTP1;MYT1L;CTNND2;ZBTB20;GRIK1;GRIK2;AFF3;PITPNC1;PDE4B;PIP4K2A;PHACTR1;RGS6;RGS7;CALN1;RBFOX1;DST;KCND2;KAZN;ANK3;WBSCR17;LRRC7;GRIA1;GPM6A;GRIA2;MACF1;KHDRBS2;NLGN1;KHDRBS3;NRXN1;NRXN3;CACNA1A;SLC1A3;FSTL5;DPP6;GPC5;FYN;CSMD3;LRRC4C;MAP4K4;OPCML;PTPRN2;SYT1;CADM1;PCDH9;NEBL;ATRNL1;LSAMP;SORBS1;ST18;QKI;PTPRD;SDK1;RALYL;DAB1;FMNL2;NBEA;TCF4;GALNTL6;CNTN4;FBXL7
sp95	2/6	0.00114124	0.0126351	0	0	56.6257	383.676	KHDRBS2;KHDRBS3
M5076 cell	2/7	0.00158844	0.0169799	0	0	45.2983	291.948	SLC1A2;SLC1A3
OV-90 cell	2/9	0.00269149	0.0260738	0	0	32.3527	191.452	ROBO2;CADM2
Eyestalk	2/9	0.00269149	0.0260738	0	0	32.3527	191.452	TMEM132D;CADM2
Myometrium	2/9	0.00269149	0.0260738	0	0	32.3527	191.452	RYR2;RYR3
Compound eye	2/11	0.00406442	0.0381809	0	0	25.1606	138.521	PARD3;HCN1
Lateral ventricle	121/11697	0.00420826	0.0383695	0	0	1.53934	8.42128	CHRM3;ATP8A2;MAML2;MYT1L;FRMPD4;CTNND2;ZBTB20;MSI2;ADARB2;SLC8A1;HS6ST3;RIMS2;GRIP1;FAM19A2;MACROD2;RGS6;ANKS1B;RGS7;CALN1;MEF2C;RBFOX1;DSCAM;ARL15;MTUS2;KAZN;FRMD4A;PRKCA;ANK3;GABRG3;KIAA1217;WBSCR17;PARD3;KCNQ3;ASTN2;KCTD16;GRIA1;GPM6A;GRIA2;MACF1;KHDRBS2;KHDRBS3;GLIS3;SLC1A2;CACNA1A;TMTC2;SLC1A3;RASAL2;NPAS3;PDZD2;CDH20;MAP2;MAN2A1;LRRC4C;DTNA;PTPRN2;AUTS2;CNTN5;CADM2;SLC4A10;ST18;QKI;PTPRD;SD…
Adrenal gland	156/16140	0.00556969	0.0493315	0	0	1.78418	9.26062	CHRM3;ATP8A2;MAML2;MYT1L;DGKB;FRMPD4;CTNND2;ZBTB20;MSI2;ADARB2;SLC8A1;HS6ST3;RIMS2;GRIP1;FAM19A2;TNR;PIP4K2A;THSD7A;MACROD2;RGS6;ANKS1B;RGS7;CALN1;MEF2C;RBFOX1;ARL15;MTUS2;KAZN;FRMD4A;PRKCA;UNC5D;ANK3;GABRG3;KIAA1217;WBSCR17;PARD3;KCNQ3;KCNQ5;ASTN2;KCTD16;GPM6A;GRIA2;MACF1;KHDRBS2;KHDRBS3;PCDH15;GLIS3;SLC1A2;CACNA1A;TMTC2;SLC1A3;RASAL2;CACNA1C;NPAS3;DPP6;PDZD2;CDH20;MAP2;MAN2A1;NXPH1;LRRC4C;GRIA4…
Pineal gland	68/5881	0.00605819	0.0516009	0	0	1.50356	7.67769	ROBO2;RYR2;CNTNAP2;DOCK4;ATP8A2;MCTP1;CTNND2;ZBTB20;GRIK2;PITPNC1;RIMS2;PIP4K2A;PHACTR1;RGS6;MEF2C;DST;PDE4D;MTUS2;KAZN;ANK3;LRRC7;ASTN2;PLCB1;GRIA1;GPM6A;GRIA2;MACF1;KHDRBS2;NLGN1;KHDRBS3;PHLPP1;NRXN1;SLC1A2;CACNA1A;SLC1A3;ADCY2;FSTL5;DPP6;PDZD2;MAP2;MAN2A1;ERBB4;GPC5;DMD;FYN;CTNNA2;CSMD3;LRRC4C;MAP4K4;OPCML;PTPRN2;SYT1;CADM1;NEBL;ATRNL1;LSAMP;SORBS1;OXR1;ST18;QKI;DAB1;FMNL2;NBEA;PPP2R2B;TCF4;GA…
Hippocampus	117/11325	0.00615881	0.0516009	0	0	1.49886	7.62902	CHRM3;ATP8A2;MAML2;MYT1L;FRMPD4;CTNND2;ZBTB20;MSI2;ADARB2;SLC8A1;HS6ST3;RIMS2;GRIP1;FAM19A2;THSD7A;MACROD2;RGS6;ANKS1B;RGS7;CALN1;MEF2C;RBFOX1;DSCAM;MTUS2;KAZN;FRMD4A;PRKCA;UNC5D;ANK3;GABRG3;KIAA1217;WBSCR17;KCNQ3;KCNQ5;ASTN2;KCTD16;GRIA1;GRIA2;MACF1;KHDRBS2;KHDRBS3;GLIS3;SLC1A2;CACNA1A;TMTC2;SLC1A3;RASAL2;NPAS3;PDZD2;CDH20;MAP2;MAN2A1;NXPH1;LRRC4C;DTNA;PTPRN2;AUTS2;SYT1;CNTN5;CADM2;NEBL;SLC4A10;…
Filament	5/140	0.00819533	0.0668566	0	0	4.23945	20.3671	DST;MAP2;NEBL;PCDH15;DMD
Hemocyte	2/17	0.00970629	0.0771526	0	0	15.0918	69.9503	DSCAM;AFF3
A7r5 cell	2/19	0.0120638	0.0934945	0	0	13.315	58.8194	KCNQ5;CACNA1C
Reticulum	2/22	0.0160167	0.121102	0	0	11.316	46.7817	RYR2;SLC8A1
Bacteroid	2/25	0.0204444	0.150899	0	0	9.83851	38.2723	NEGR1;ANKS1B
Neuron	2/27	0.0236463	0.170473	0	0	9.05051	33.8901	SNTG1;CACNA1A
Connective tissue	101/9893	0.0251793	0.1774	0	0	1.36138	5.01225	CHRM3;MAML2;FRMPD4;CTNND2;ZBTB20;MSI2;ADARB2;RIMS2;GRIP1;FAM19A2;TNR;THSD7A;RGS6;ANKS1B;RGS7;CALN1;MEF2C;ARL15;MTUS2;KAZN;FRMD4A;PRKCA;UNC5D;ANK3;GABRG3;KIAA1217;PARD3;KCNQ3;ASTN2;KCTD16;GRIA1;GRIA2;MACF1;KHDRBS2;KHDRBS3;GLIS3;TMTC2;RASAL2;CACNA1C;NPAS3;PDZD2;CDH20;MAN2A1;NXPH1;LRRC4C;PTPRN2;AUTS2;CNTN5;CADM1;CADM2;SLC4A10;ST18;QKI;PTPRD;SDK1;DLG2;NBEA;TCF4;GALNTL6;XKR4;DPP10;ROBO2;RYR2;TENM2;KCN…
Spinal cord	114/11398	0.026319	0.181309	0	0	1.36933	4.98089	ATP8A2;MAML2;DGKB;FRMPD4;CTNND2;ZBTB20;MSI2;SLC8A1;TNR;PIP4K2A;THSD7A;MACROD2;RGS6;ANKS1B;RGS7;MEF2C;KAZN;PRKCA;ANK3;KIAA1217;PARD3;KCNQ3;ASTN2;KCTD16;GPM6A;GRIA2;MACF1;KHDRBS2;KHDRBS3;GLIS3;SLC1A2;CACNA1A;TMTC2;SLC1A3;RASAL2;NPAS3;DPP6;PDZD2;CDH20;MAP2;MAN2A1;NXPH1;TRPM3;GRIA4;DTNA;PTPRN2;AUTS2;SYT1;CADM1;CADM2;NEBL;SLC4A10;LRP1B;ST18;QKI;PTPRD;SDK1;RALYL;DLG2;FGF14;NBEA;TCF4;FGF12;FBXL7;RNF220;…
Adult	14/918	0.0337579	0.226676	0	0	1.79751	6.09092	GRIA1;GRIA2;MEF2C;KCND2;SLC1A2;SLC1A3;CACNA1C;GRIN2B;GRM5;MAP2;ERBB4;TNR;DMD;GRIA4
Filopodium	2/33	0.034367	0.226676	0	0	7.29659	24.5943	GPM6A;FMNL2
Outer hair cell	2/37	0.0423696	0.233376	0	0	6.46139	20.4265	PCDH15;KCNQ5
Choroid plexus papilloma cell	1/5	0.0434777	0.233376	0	0	28.152	88.2707	TRPM3
Vestibulocochlear nerve	1/5	0.0434777	0.233376	0	0	28.152	88.2707	PCDH9
Yolk sac cancer cell	1/5	0.0434777	0.233376	0	0	28.152	88.2707	CTNNA2
ac2	1/5	0.0434777	0.233376	0	0	28.152	88.2707	ADCY2
PC-12D cell	1/5	0.0434777	0.233376	0	0	28.152	88.2707	PTPRG
Pancreatic ductal adenocarcinoma cell	1/5	0.0434777	0.233376	0	0	28.152	88.2707	ADCY2
H9 cell	1/5	0.0434777	0.233376	0	0	28.152	88.2707	HS6ST3
Alate adult	1/5	0.0434777	0.233376	0	0	28.152	88.2707	SNTG1
ML-2 cell	1/5	0.0434777	0.233376	0	0	28.152	88.2707	MIR99AHG
non-neuronal cell	2/39	0.0466063	0.233376	0	0	6.11151	18.738	NLGN1;MAP2
TSA cell	1/6	0.051945	0.233376	0	0	22.5205	66.6058	KCNQ3
Criduchat	1/6	0.051945	0.233376	0	0	22.5205	66.6058	CTNND2
Diffuse large B-cell lymphoma cell	1/6	0.051945	0.233376	0	0	22.5205	66.6058	CADM1
NMuMg cell	1/6	0.051945	0.233376	0	0	22.5205	66.6058	WBSCR17
Neocortex	1/6	0.051945	0.233376	0	0	22.5205	66.6058	UNC5D
Fbt	1/6	0.051945	0.233376	0	0	22.5205	66.6058	PTPRN2
Floral primordium	1/6	0.051945	0.233376	0	0	22.5205	66.6058	KHDRBS2
Peritubular contractile cell	1/6	0.051945	0.233376	0	0	22.5205	66.6058	CTNNA3
Hi-5 cell	1/6	0.051945	0.233376	0	0	22.5205	66.6058	SLC8A1
Bpe	1/6	0.051945	0.233376	0	0	22.5205	66.6058	DST
M5 melanoma cell	1/6	0.051945	0.233376	0	0	22.5205	66.6058	FMNL2
Chromaffin cell	1/7	0.0603378	0.233809	0	0	18.7661	52.6914	CACNA1C
Colonic neoplasm cell	1/7	0.0603378	0.233809	0	0	18.7661	52.6914	CTNNA2
Daphnid	1/7	0.0603378	0.233809	0	0	18.7661	52.6914	TMEM132D
Oliva	1/7	0.0603378	0.233809	0	0	18.7661	52.6914	GRID2
alphaT3-1 cell	1/7	0.0603378	0.233809	0	0	18.7661	52.6914	PLCB1
free-living state	1/7	0.0603378	0.233809	0	0	18.7661	52.6914	NEGR1
Granule cell	1/7	0.0603378	0.233809	0	0	18.7661	52.6914	GRID2
Grm	1/7	0.0603378	0.233809	0	0	18.7661	52.6914	GRM7
Thymocyte	1/7	0.0603378	0.233809	0	0	18.7661	52.6914	TCF4
Adenoid	1/7	0.0603378	0.233809	0	0	18.7661	52.6914	MAML2
Amnioserosa	1/7	0.0603378	0.233809	0	0	18.7661	52.6914	PARD3
Myotube	3/103	0.0634908	0.236484	0	0	3.40052	9.37475	MEF2C;DMD;RYR3
Neuroblast	2/48	0.0674123	0.236484	0	0	4.91354	13.2515	MAP2;PARD3
Middle cerebral artery	1/8	0.0686567	0.236484	0	0	16.0844	43.0843	SLC1A2
fh4	1/8	0.0686567	0.236484	0	0	16.0844	43.0843	FGF14
n18	1/8	0.0686567	0.236484	0	0	16.0844	43.0843	ATP8A2
Pleomorphic adenoma cell	1/8	0.0686567	0.236484	0	0	16.0844	43.0843	MAML2
Regio orbitalis	1/8	0.0686567	0.236484	0	0	16.0844	43.0843	CSMD1
KE-37 cell	1/8	0.0686567	0.236484	0	0	16.0844	43.0843	TMEM132D
COS-7 cell	1/8	0.0686567	0.236484	0	0	16.0844	43.0843	RGS6
MM-1 cell	1/8	0.0686567	0.236484	0	0	16.0844	43.0843	NBEA
Olfactory bulb	46/4257	0.0767954	0.248331	0	0	1.30185	3.34133	GPM6A;GRIA2;MACF1;KHDRBS2;NLGN1;ATP8A2;KHDRBS3;MCTP1;ZBTB20;SLC1A3;FSTL5;PDZD2;MAN2A1;PIP4K2A;PHACTR1;GPC5;DMD;FYN;THSD7A;CSMD3;LRRC4C;RGS6;MAP4K4;AUTS2;CADM1;DST;PCDH9;NEBL;ATRNL1;LSAMP;KAZN;PRKCA;ANK3;SORBS1;OXR1;QKI;WBSCR17;DAB1;FMNL2;NBEA;LRRC7;DLC1;TCF4;GALNTL6;CNTN4;FBXL7
lc90	1/9	0.0769024	0.248331	0	0	14.0732	36.1007	LRRC4C
Photophore	1/9	0.0769024	0.248331	0	0	14.0732	36.1007	DST
IM-9 cell	1/9	0.0769024	0.248331	0	0	14.0732	36.1007	CNTN5
SGC-7901 cell	1/9	0.0769024	0.248331	0	0	14.0732	36.1007	CALN1
Bile duct	1/9	0.0769024	0.248331	0	0	14.0732	36.1007	CHRM3
EB-1 cell	2/53	0.0800597	0.255861	0	0	4.4307	11.1874	MACF1;MTUS2
Peripheral nervous system	4/186	0.0835189	0.256052	0	0	2.4952	6.1948	SYT1;CADPS;CTNNA2;ERC2
Melanocyte cell line	1/10	0.0850755	0.256052	0	0	12.5088	30.8245	CDH20
FM3A cell	1/10	0.0850755	0.256052	0	0	12.5088	30.8245	TMEM132D
p1	1/10	0.0850755	0.256052	0	0	12.5088	30.8245	CNTN5
Calyx	1/10	0.0850755	0.256052	0	0	12.5088	30.8245	CHRM3
Sporulating cell	1/10	0.0850755	0.256052	0	0	12.5088	30.8245	KCNIP4
Chondrocyte cell line	1/11	0.0931766	0.272498	0	0	11.2574	26.7167	HS6ST3
Choroid plexus	1/11	0.0931766	0.272498	0	0	11.2574	26.7167	SLC4A10
vp8	1/11	0.0931766	0.272498	0	0	11.2574	26.7167	SYN3
Ventral nerve cord	1/12	0.101206	0.285992	0	0	10.2335	23.4407	ROBO2
BEAS-2B cell	1/12	0.101206	0.285992	0	0	10.2335	23.4407	KAZN
MKN-45 cell	1/12	0.101206	0.285992	0	0	10.2335	23.4407	CALN1
Testis	161/17517	0.101481	0.285992	0	0	1.43029	3.27235	CHRM3;ATP8A2;MAML2;MYT1L;FRMPD4;CTNND2;ZBTB20;MSI2;ADARB2;SLC8A1;HS6ST3;RIMS2;GRIP1;FAM19A2;TNR;PIP4K2A;THSD7A;MACROD2;RGS6;ANKS1B;RGS7;CALN1;MEF2C;RBFOX1;ARL15;MTUS2;KAZN;FRMD4A;PRKCA;UNC5D;ANK3;GABRG3;KIAA1217;WBSCR17;PARD3;KCNQ3;KCNQ5;ASTN2;KCTD16;GRIA1;GPM6A;GRIA2;MACF1;KHDRBS2;KHDRBS3;PCDH15;GLIS3;SLC1A2;CACNA1A;TMTC2;SLC1A3;RASAL2;CACNA1C;NPAS3;DPP6;PDZD2;CDH20;SNTG1;MAP2;MAN2A1;NXPH1;LRRC4…
Pancreas	149/16051	0.108611	0.294272	0	0	1.31212	2.91289	CHRM3;ATP8A2;MAML2;MYT1L;FRMPD4;CTNND2;ZBTB20;MSI2;ADARB2;SLC8A1;HS6ST3;RIMS2;GRIP1;FAM19A2;PIP4K2A;THSD7A;MACROD2;RGS6;ANKS1B;RGS7;CALN1;MEF2C;RBFOX1;DSCAM;ARL15;MTUS2;KAZN;FRMD4A;PRKCA;UNC5D;ANK3;GABRG3;KIAA1217;WBSCR17;PARD3;KCNQ3;KCNQ5;ASTN2;KCTD16;GRIA1;GRIA2;MACF1;KHDRBS2;KHDRBS3;GLIS3;SLC1A2;CACNA1A;TMTC2;SLC1A3;RASAL2;CACNA1C;NPAS3;DPP6;PDZD2;CDH20;MAP2;MAN2A1;NXPH1;LRRC4C;TRPM3;DTNA;PTPR…
Brain stem	1/13	0.109165	0.294272	0	0	9.38021	20.7761	ANK3
Flower bud	1/13	0.109165	0.294272	0	0	9.38021	20.7761	KHDRBS2
Pronephric tubule	1/13	0.109165	0.294272	0	0	9.38021	20.7761	GLIS3
Ruminal fluid	1/13	0.109165	0.294272	0	0	9.38021	20.7761	PDE4D
Gastroesophageal junction	1/14	0.117054	0.310144	0	0	8.65822	18.5729	WWOX
Perineuronal net	1/14	0.117054	0.310144	0	0	8.65822	18.5729	TNR
Muscle stem cell	1/15	0.124874	0.314723	0	0	8.03937	16.7255	DMD
Esophageal cancer cell line	1/15	0.124874	0.314723	0	0	8.03937	16.7255	WWOX
Oligodendrocyte	1/15	0.124874	0.314723	0	0	8.03937	16.7255	QKI
nd7/23	1/15	0.124874	0.314723	0	0	8.03937	16.7255	FGF14
Human aortic endothelial cell	1/15	0.124874	0.314723	0	0	8.03937	16.7255	CADM1
Spinal nerve	1/15	0.124874	0.314723	0	0	8.03937	16.7255	SLC1A2
NB-4 cell	1/16	0.132625	0.328909	0	0	7.50303	15.1579	CNTN5
Regio parietalis capitis	1/16	0.132625	0.328909	0	0	7.50303	15.1579	ZNF804A
Wes	1/17	0.140307	0.342482	0	0	7.03374	13.8137	FRMPD4
Fhm	1/17	0.140307	0.342482	0	0	7.03374	13.8137	CACNA1A
Schwann cell	2/75	0.142569	0.34478	0	0	3.09198	6.02296	ERBB4;ANK3
Molting gland	1/18	0.147922	0.34478	0	0	6.61965	12.6506	TMEM132D
Feather	1/18	0.147922	0.34478	0	0	6.61965	12.6506	TMEM132D
Feather bud	1/18	0.147922	0.34478	0	0	6.61965	12.6506	PCDH9
Retinal ganglion cell	1/18	0.147922	0.34478	0	0	6.61965	12.6506	ROBO2
Auditory vesicle	1/18	0.147922	0.34478	0	0	6.61965	12.6506	LRRTM4
Smooth muscle	91/9462	0.153297	0.354641	0	0	1.1802	2.21333	ROBO2;CHRM3;TENM2;MAML2;FRMPD4;KCNC2;CTNND2;ZBTB20;GRIK1;MSI2;GRIK2;ADARB2;AFF3;PITPNC1;RYR3;HS6ST3;RIMS2;GRIP1;GRM5;GRM7;FAM19A2;TNR;DLGAP1;PHACTR1;MACROD2;ERC2;RGS6;ANKS1B;RGS7;CALN1;MEF2C;GRID2;DST;KCND2;ARL15;PDE4D;MTUS2;KAZN;FRMD4A;PRKCA;KCNAB1;WBSCR17;LRRC7;KCNQ3;ASTN2;PLCB1;KCTD16;GRIA2;MACF1;KHDRBS3;PHLPP1;LUZP2;GLIS3;TMTC2;SLC1A3;ADCY2;CACNA1C;FSTL5;DPP6;PDZD2;CDH20;MAP2;MAN2A1;ERBB4;DMD…
Exoskeleton	1/20	0.162951	0.371432	0	0	5.92225	10.7448	KAZN
Hepatopancreas	1/20	0.162951	0.371432	0	0	5.92225	10.7448	TMEM132D
Mesenchymal stem cell	3/159	0.167004	0.371926	0	0	2.17363	3.89022	MEF2C;MAP2;TCF4
Chorionic villus	1/21	0.170366	0.371926	0	0	5.62585	9.95667	DMD
Fer	1/21	0.170366	0.371926	0	0	5.62585	9.95667	ARL15
Pancreatic beta cell line	1/21	0.170366	0.371926	0	0	5.62585	9.95667	PTPRN2
Hatching gland	1/21	0.170366	0.371926	0	0	5.62585	9.95667	GALNTL6
SF-9 cell	1/21	0.170366	0.371926	0	0	5.62585	9.95667	PLCB1
Vero cell	1/22	0.177716	0.379804	0	0	5.35768	9.25577	SYN3
Glioblastoma cell	1/22	0.177716	0.379804	0	0	5.35768	9.25577	MAP4K4
Hemolymph	1/22	0.177716	0.379804	0	0	5.35768	9.25577	TMEM132D
Microvessel	1/23	0.185001	0.379804	0	0	5.11389	8.62915	WWOX
fh1	1/23	0.185001	0.379804	0	0	5.11389	8.62915	FMNL2
Skin fibroblast	1/23	0.185001	0.379804	0	0	5.11389	8.62915	TCF4
pi1	1/23	0.185001	0.379804	0	0	5.11389	8.62915	DPP6
Bipolar cell	1/23	0.185001	0.379804	0	0	5.11389	8.62915	PRKCA
ChaGo-K-1 cell	1/23	0.185001	0.379804	0	0	5.11389	8.62915	NRXN1
Mo-B cell	1/24	0.192222	0.386941	0	0	4.8913	8.06627	NEGR1
ZR-75-30 cell	1/24	0.192222	0.386941	0	0	4.8913	8.06627	PIP4K2A
Cerebellar Purkinje cell	1/24	0.192222	0.386941	0	0	4.8913	8.06627	GRID2
Mantle cell lymphoma cell	1/25	0.19938	0.398759	0	0	4.68726	7.55842	CADM1
Saccule	1/26	0.206474	0.410301	0	0	4.49955	7.0984	PCDH15
Electric organ	1/27	0.213506	0.413667	0	0	4.32627	6.68015	DMD
Vestibular hair cell	1/27	0.213506	0.413667	0	0	4.32627	6.68015	PCDH15
Amniocyte	1/27	0.213506	0.413667	0	0	4.32627	6.68015	CNTN4
Barrett's esophagus	1/27	0.213506	0.413667	0	0	4.32627	6.68015	WWOX
Myoblast	2/99	0.218477	0.414227	0	0	2.32412	3.53517	MEF2C;DMD
Swiss-3T3 cell	1/28	0.220476	0.414227	0	0	4.16582	6.29859	PLCB1
Syncytium	1/28	0.220476	0.414227	0	0	4.16582	6.29859	SYN3
Ureter	1/28	0.220476	0.414227	0	0	4.16582	6.29859	CHRM3
ae2	1/28	0.220476	0.414227	0	0	4.16582	6.29859	SLC4A10
Lung cancer cell	2/103	0.231506	0.432213	0	0	2.23163	3.26521	CACNA1A;LRP1B
Aorta endothelium	1/30	0.234232	0.432213	0	0	3.87813	5.6289	PTPRG
Fat body	1/30	0.234232	0.432213	0	0	3.87813	5.6289	AFF3
Trigeminal nerve	1/31	0.241019	0.436935	0	0	3.74867	5.33391	CACNA1A
P-19 cell	1/31	0.241019	0.436935	0	0	3.74867	5.33391	MEF2C
Macrophage	1/31	0.241019	0.436935	0	0	3.74867	5.33391	MAP4K4
Renal epithelium	1/32	0.247746	0.441387	0	0	3.62757	5.06172	ZNF385D
BMMC cell	1/32	0.247746	0.441387	0	0	3.62757	5.06172	FYN
Sciatic nerve	1/32	0.247746	0.441387	0	0	3.62757	5.06172	GRIN2B
Fruit	2/110	0.25441	0.449614	0	0	2.08624	2.85567	MACF1;WWOX
Ovary	146/16042	0.255265	0.449614	0	0	1.16349	1.5887	CHRM3;ATP8A2;MAML2;FRMPD4;CTNND2;ZBTB20;MSI2;ADARB2;SLC8A1;HS6ST3;RIMS2;GRIP1;FAM19A2;TNR;PIP4K2A;THSD7A;MACROD2;RGS6;ANKS1B;RGS7;CALN1;MEF2C;RBFOX1;DSCAM;ARL15;MTUS2;KAZN;FRMD4A;PRKCA;UNC5D;ANK3;GABRG3;KIAA1217;WBSCR17;PARD3;ASTN2;KCTD16;GRIA1;GPM6A;GRIA2;MACF1;KHDRBS2;KHDRBS3;PCDH15;GLIS3;SLC1A2;CACNA1A;TMTC2;SLC1A3;RASAL2;CACNA1C;NPAS3;DPP6;PDZD2;MAP2;MAN2A1;NXPH1;LRRC4C;TRPM3;GRIA4;DTNA;PTPRN…
Cerebral white matter	1/34	0.261024	0.455503	0	0	3.40737	4.57659	QKI
Epididymis	115/12472	0.261547	0.455503	0	0	1.12068	1.50299	CHRM3;ATP8A2;MAML2;MYT1L;FRMPD4;CTNND2;ZBTB20;MSI2;ADARB2;SLC8A1;HS6ST3;RIMS2;GRIP1;FAM19A2;TNR;MACROD2;RGS6;ANKS1B;RGS7;CALN1;MEF2C;RBFOX1;MTUS2;KAZN;FRMD4A;PRKCA;ANK3;GABRG3;KIAA1217;PARD3;KCNQ3;KCNQ5;ASTN2;KCTD16;GRIA2;MACF1;KHDRBS2;KHDRBS3;GLIS3;SLC1A2;CACNA1A;TMTC2;RASAL2;CACNA1C;NPAS3;PDZD2;CDH20;MAP2;MAN2A1;LRRC4C;DTNA;PTPRN2;AUTS2;CNTN5;CADM1;NEBL;ST18;QKI;PTPRD;SDK1;RALYL;DLG2;DAB1;NBEA;…
Ureteric bud	1/35	0.267575	0.463398	0	0	3.30699	4.35978	ROBO2
Heart	130/14216	0.271985	0.464296	0	0	1.12653	1.46675	ATP8A2;MAML2;MYT1L;FRMPD4;CTNND2;ZBTB20;MSI2;ADARB2;SLC8A1;HS6ST3;RIMS2;PIP4K2A;THSD7A;RGS6;ANKS1B;RGS7;CALN1;MEF2C;RBFOX1;DSCAM;ARL15;MTUS2;KAZN;FRMD4A;PRKCA;UNC5D;ANK3;KIAA1217;WBSCR17;PARD3;KCNQ3;ASTN2;KCTD16;GRIA1;MACF1;KHDRBS2;KHDRBS3;PCDH15;GLIS3;SLC1A2;CACNA1A;TMTC2;SLC1A3;RASAL2;CACNA1C;NPAS3;DPP6;PDZD2;MAP2;MAN2A1;LRRC4C;DTNA;AUTS2;CADM1;CADM2;NEBL;LRP1B;QKI;PTPRD;RALYL;DLG2;DAB1;FGF14;N…
Ovary cell line	1/36	0.274068	0.464296	0	0	3.21234	4.15798	OPCML
lat1	1/36	0.274068	0.464296	0	0	3.21234	4.15798	RBFOX1
Neural stem cell	2/116	0.274084	0.464296	0	0	1.97584	2.55737	MAP2;SLC1A3
Cochlear hair cell	1/37	0.280504	0.470034	0	0	3.12295	3.96979	PCDH15
Inner hair cell	1/37	0.280504	0.470034	0	0	3.12295	3.96979	SLC1A3
Breast	111/12084	0.292799	0.486064	0	0	1.10267	1.35438	CHRM3;MAML2;FRMPD4;CTNND2;ZBTB20;MSI2;ADARB2;SLC8A1;RIMS2;GRIP1;FAM19A2;MACROD2;RGS6;ANKS1B;RGS7;CALN1;MEF2C;RBFOX1;MTUS2;KAZN;PRKCA;UNC5D;ANK3;GABRG3;KIAA1217;PARD3;KCNQ3;KCNQ5;ASTN2;KCTD16;GRIA2;MACF1;KHDRBS2;KHDRBS3;GLIS3;TMTC2;SLC1A3;RASAL2;CACNA1C;NPAS3;DPP6;PDZD2;CDH20;MAN2A1;LRRC4C;PTPRN2;AUTS2;CNTN5;CADM1;NEBL;SLC4A10;ST18;PTPRD;SDK1;DAB1;NBEA;TCF4;GALNTL6;CNTN4;XKR4;RNF220;DPP10;ROBO2;RY…
Satellite cell	1/39	0.293207	0.486064	0	0	2.95828	3.62945	DMD
Photoreceptor cell	1/40	0.299474	0.491201	0	0	2.88228	3.47525	PCDH15
SGS cell	1/40	0.299474	0.491201	0	0	2.88228	3.47525	SYN3
Rectum	134/14744	0.305989	0.499246	0	0	1.11192	1.31674	CHRM3;ATP8A2;MAML2;MYT1L;FRMPD4;CTNND2;MSI2;ADARB2;SLC8A1;HS6ST3;RIMS2;GRIP1;FAM19A2;TNR;PIP4K2A;THSD7A;MACROD2;RGS6;ANKS1B;RGS7;CALN1;MEF2C;RBFOX1;ARL15;MTUS2;KAZN;PRKCA;UNC5D;ANK3;GABRG3;KIAA1217;PARD3;KCNQ3;ASTN2;KCTD16;GRIA1;GPM6A;GRIA2;MACF1;KHDRBS2;KHDRBS3;GLIS3;TMTC2;RASAL2;NPAS3;DPP6;PDZD2;CDH20;MAN2A1;NXPH1;LRRC4C;TRPM3;GRIA4;DTNA;PTPRN2;AUTS2;SYT1;CNTN5;CADM1;CADM2;NEBL;SLC4A10;ST18;QKI…
Carcinoma cell	1/42	0.311843	0.506133	0	0	2.74141	3.19444	MAML2
Superior cervical ganglion	45/4740	0.320999	0.51828	0	0	1.09846	1.2482	GRIA1;DPP10;GPM6A;MACF1;KHDRBS2;NLGN1;ATP8A2;KHDRBS3;MCTP1;SLC44A1;DGKB;ZBTB20;GRIK1;AFF3;PITPNC1;NPAS3;FSTL5;LRRTM4;PDE4B;DLGAP1;PHACTR1;GPC5;CTNNA3;FYN;ZNF385D;CSMD3;LRRC4C;ERC2;RGS6;CADM1;DST;NEBL;ATRNL1;LSAMP;KAZN;SORBS1;QKI;DAB1;NBEA;LRRC7;TCF4;GALNTL6;CNTN4;PLCB1;FBXL7
Cerebrospinal fluid	1/44	0.323995	0.520407	0	0	2.61364	2.94564	TNR
Lung fibroblast	1/45	0.329991	0.524602	0	0	2.55411	2.83171	CACNA1C
Mammary gland cell line	1/45	0.329991	0.524602	0	0	2.55411	2.83171	ERBB4
Umbilical vein endothelial cell	1/47	0.341825	0.540641	0	0	2.44281	2.62225	PDE4D
Meristem	1/48	0.347663	0.544321	0	0	2.39072	2.52584	KHDRBS2
Stratified epithelium	1/48	0.347663	0.544321	0	0	2.39072	2.52584	DST
Trigeminal ganglion	40/4239	0.351379	0.547374	0	0	1.08639	1.13625	DPP10;MACF1;KHDRBS2;NLGN1;ATP8A2;KHDRBS3;MCTP1;SLC44A1;ZBTB20;GRIK1;AFF3;PITPNC1;NPAS3;FSTL5;LRRTM4;PDE4B;DLGAP1;PHACTR1;GPC5;CTNNA3;FYN;CSMD3;LRRC4C;RGS6;OPCML;CADM1;DST;NEBL;ATRNL1;LSAMP;KAZN;SORBS1;QKI;DAB1;NBEA;LRRC7;TCF4;GALNTL6;CNTN4;FBXL7
Submucosa	1/51	0.364872	0.565551	0	0	2.24693	2.26538	WWOX
Root tip	1/52	0.370507	0.571429	0	0	2.20276	2.18709	KHDRBS2
Embryoid body	1/55	0.387116	0.594089	0	0	2.08007	1.97405	MEF2C
Eye	51/5536	0.39526	0.601772	0	0	1.05806	0.982105	CNTNAP2;GRIK1;MSI2;PITPNC1;RYR3;DLGAP1;CALN1;DST;KAZN;FRMD4A;PRKCA;ANK3;KIAA1217;PARD3;ASTN2;GPM6A;MACF1;PHLPP1;CACNA1A;SLC1A3;RASAL2;DPP6;MAP2;MAN2A1;DMD;CTNNA3;FYN;CTNNA2;TRPM3;GRIA4;MAP4K4;OPCML;DTNA;PTPRN2;SYT1;CADM1;NEBL;CADPS;LSAMP;LHFPL3;OXR1;QKI;DLG2;NBEA;NFIA;PPP2R2B;DLC1;TCF4;FGF12;FBXL7;RNF220
Mast cell	2/154	0.396333	0.601772	0	0	1.47902	1.36884	CADM1;FYN
Optic nerve	1/57	0.397946	0.601772	0	0	2.00558	1.84802	SLC1A3
Parathyroid gland	94/10379	0.402177	0.602515	0	0	1.05027	0.956655	DPP10;ROBO2;CHRM3;RYR2;CNTNAP2;TENM2;MYT1L;FRMPD4;KCNC2;ZBTB20;GRIK1;GRIK2;ADARB2;AFF3;PITPNC1;RYR3;RIMS2;GRIP1;GRM5;GRM7;FAM19A2;DLGAP1;PHACTR1;MACROD2;RGS6;ANKS1B;RGS7;CALN1;MEF2C;RBFOX1;GRID2;KCND2;PDE4D;MTUS2;KAZN;FRMD4A;ANK3;SYN3;KIAA1217;LRRC7;KCNQ3;KCNQ5;ASTN2;KCTD16;GRIA1;GRIA2;KHDRBS2;NLGN1;KHDRBS3;PHLPP1;NRXN3;TMTC2;SLC1A3;ADCY2;RASAL2;NPAS3;FSTL5;PDZD2;CDH20;MAN2A1;ERBB4;GPC5;DMD;CTNNA…
Colon	151/16859	0.402324	0.602515	0	0	1.08277	0.985861	CHRM3;ATP8A2;MAML2;MYT1L;FRMPD4;CTNND2;ZBTB20;MSI2;ADARB2;SLC8A1;HS6ST3;RIMS2;GRIP1;FAM19A2;TNR;PIP4K2A;THSD7A;MACROD2;RGS6;ANKS1B;RGS7;CALN1;MEF2C;RBFOX1;DSCAM;ARL15;MTUS2;KAZN;FRMD4A;PRKCA;UNC5D;ANK3;GABRG3;KIAA1217;WBSCR17;PARD3;KCNQ3;KCNQ5;ASTN2;KCTD16;GRIA1;GPM6A;GRIA2;MACF1;KHDRBS2;KHDRBS3;GLIS3;SLC1A2;CACNA1A;TMTC2;SLC1A3;RASAL2;CACNA1C;NPAS3;DPP6;PDZD2;CDH20;MAP2;MAN2A1;NXPH1;LRRC4C;GRIA4…
Fiber	3/263	0.412195	0.614329	0	0	1.29728	1.14973	MAP2;DMD;LRRC4C
Ophthalmic nerve	32/3453	0.417397	0.619105	0	0	1.0581	0.92448	DPP10;MACF1;KHDRBS2;NLGN1;ATP8A2;MCTP1;DGKB;ZBTB20;GRIK1;AFF3;FSTL5;PHACTR1;GPC5;CTNNA3;FYN;CSMD3;LRRC4C;RGS6;CADM1;DST;ATRNL1;LSAMP;KAZN;SORBS1;QKI;DAB1;NBEA;LRRC7;TCF4;GALNTL6;CNTN4;FBXL7
Seminal vesicle	105/11672	0.428547	0.632618	0	0	1.04089	0.882004	CHRM3;ATP8A2;MAML2;FRMPD4;CTNND2;ZBTB20;MSI2;ADARB2;SLC8A1;HS6ST3;RIMS2;GRIP1;FAM19A2;MACROD2;RGS6;ANKS1B;RGS7;MEF2C;RBFOX1;MTUS2;KAZN;FRMD4A;PRKCA;UNC5D;ANK3;GABRG3;KIAA1217;KCNQ3;KCNQ5;ASTN2;KCTD16;GRIA2;MACF1;KHDRBS3;GLIS3;TMTC2;RASAL2;CACNA1C;PDZD2;CDH20;MAP2;MAN2A1;NXPH1;LRRC4C;TMEM132D;DTNA;PTPRN2;AUTS2;SYT1;CNTN5;CADM1;ST18;QKI;PTPRD;SDK1;DAB1;NBEA;TCF4;XKR4;RNF220;DPP10;RYR2;TENM2;MCTP1;K…
Colorectal cancer cell	1/68	0.454197	0.664156	0	0	1.67537	1.32225	FMNL2
Pancreatic beta cell	1/68	0.454197	0.664156	0	0	1.67537	1.32225	GLIS3
Gall bladder	146/16366	0.456546	0.664457	0	0	1.04618	0.82027	CHRM3;ATP8A2;MAML2;MYT1L;FRMPD4;CTNND2;ZBTB20;MSI2;ADARB2;SLC8A1;HS6ST3;RIMS2;GRIP1;FAM19A2;TNR;PIP4K2A;THSD7A;MACROD2;RGS6;ANKS1B;RGS7;CALN1;MEF2C;RBFOX1;ARL15;MTUS2;KAZN;FRMD4A;PRKCA;UNC5D;ANK3;GABRG3;KIAA1217;WBSCR17;PARD3;KCNQ3;ASTN2;KCTD16;GPM6A;GRIA2;MACF1;KHDRBS2;KHDRBS3;GLIS3;SLC1A2;TMTC2;SLC1A3;RASAL2;CACNA1C;NPAS3;DPP6;PDZD2;CDH20;MAP2;MAN2A1;LRRC4C;TMEM132D;DTNA;PTPRN2;AUTS2;SYT1;CNTN5…
Plasma cell	3/286	0.465702	0.674616	0	0	1.19045	0.90975	MAN2A1;CNTN4;PTPRG
Uterine endometrium	101/11318	0.480925	0.693427	0	0	1.01961	0.746396	CHRM3;MAML2;FRMPD4;CTNND2;ZBTB20;MSI2;ADARB2;SLC8A1;HS6ST3;RIMS2;GRIP1;FAM19A2;TNR;MACROD2;RGS6;ANKS1B;RGS7;CALN1;MEF2C;MTUS2;KAZN;PRKCA;UNC5D;ANK3;GABRG3;KIAA1217;PARD3;KCNQ3;ASTN2;KCTD16;GRIA1;GRIA2;MACF1;KHDRBS2;KHDRBS3;GLIS3;TMTC2;SLC1A3;RASAL2;NPAS3;PDZD2;CDH20;MAP2;MAN2A1;NXPH1;LRRC4C;DTNA;AUTS2;CNTN5;CADM1;CADM2;NEBL;ST18;QKI;PTPRD;SDK1;DAB1;NBEA;TCF4;XKR4;RNF220;DPP10;ROBO2;RYR2;TENM2;KCN…
Neuroblastoma cell	2/187	0.494519	0.709726	0	0	1.21316	0.854269	NXPH1;OXR1
Colonic adenocarcinoma cell	1/78	0.500784	0.712048	0	0	1.45705	1.00767	WWOX
Cancer stem cell	1/78	0.500784	0.712048	0	0	1.45705	1.00767	TCF4
Nasopharynx	110/12374	0.503028	0.712048	0	0	1.01193	0.695307	CHRM3;MAML2;FRMPD4;CTNND2;ZBTB20;MSI2;ADARB2;SLC8A1;HS6ST3;RIMS2;GRIP1;FAM19A2;TNR;MACROD2;RGS6;ANKS1B;RGS7;CALN1;MEF2C;ARL15;MTUS2;KAZN;FRMD4A;PRKCA;UNC5D;ANK3;GABRG3;KIAA1217;PARD3;KCNQ3;ASTN2;KCTD16;GRIA2;MACF1;KHDRBS2;KHDRBS3;GLIS3;TMTC2;RASAL2;CACNA1C;NPAS3;PDZD2;CDH20;MAP2;MAN2A1;NXPH1;LRRC4C;DTNA;AUTS2;CNTN5;CADM1;NEBL;SLC4A10;QKI;PTPRD;SDK1;DLG2;DAB1;TCF4;GALNTL6;XKR4;RNF220;DPP10;ROBO2;R…
Prostate gland	141/15901	0.523897	0.738219	0	0	1.00973	0.652753	CHRM3;ATP8A2;MAML2;FRMPD4;CTNND2;ZBTB20;MSI2;ADARB2;SLC8A1;HS6ST3;RIMS2;GRIP1;FAM19A2;TNR;PIP4K2A;THSD7A;MACROD2;RGS6;ANKS1B;RGS7;CALN1;MEF2C;RBFOX1;DSCAM;ARL15;MTUS2;KAZN;FRMD4A;PRKCA;UNC5D;ANK3;GABRG3;KIAA1217;WBSCR17;PARD3;KCNQ3;KCNQ5;ASTN2;KCTD16;GPM6A;GRIA2;MACF1;KHDRBS2;KHDRBS3;GLIS3;TMTC2;SLC1A3;RASAL2;CACNA1C;NPAS3;DPP6;PDZD2;CDH20;MAP2;MAN2A1;NXPH1;LRRC4C;TRPM3;DTNA;PTPRN2;AUTS2;SYT1;CNT…
Skeletal muscle	135/15243	0.534334	0.746546	0	0	1.00313	0.628698	CHRM3;ATP8A2;MAML2;FRMPD4;CTNND2;ZBTB20;MSI2;ADARB2;SLC8A1;HS6ST3;RIMS2;GRIP1;FAM19A2;TNR;PIP4K2A;MACROD2;RGS6;ANKS1B;RGS7;CALN1;MEF2C;RBFOX1;ARL15;MTUS2;KAZN;FRMD4A;PRKCA;ANK3;GABRG3;KIAA1217;WBSCR17;PARD3;KCNQ5;ASTN2;KCTD16;GRIA1;GRIA2;MACF1;KHDRBS2;KHDRBS3;GLIS3;SLC1A2;TMTC2;SLC1A3;RASAL2;NPAS3;PDZD2;CDH20;MAP2;MAN2A1;NXPH1;LRRC4C;TMEM132D;DTNA;PTPRN2;AUTS2;SYT1;CNTN5;CADM1;CADM2;NEBL;SLC4A10;…
Mesoderm	1/86	0.535188	0.746546	0	0	1.31939	0.824796	MEF2C
Cardiac muscle	134/15135	0.537031	0.746546	0	0	1.00171	0.622764	CHRM3;MAML2;MYT1L;FRMPD4;CTNND2;ZBTB20;MSI2;ADARB2;SLC8A1;HS6ST3;RIMS2;GRIP1;FAM19A2;TNR;PIP4K2A;MACROD2;RGS6;ANKS1B;RGS7;CALN1;MEF2C;RBFOX1;ARL15;MTUS2;KAZN;FRMD4A;PRKCA;UNC5D;ANK3;KIAA1217;WBSCR17;PARD3;KCNQ3;KCNQ5;ASTN2;KCTD16;GRIA1;GPM6A;MACF1;KHDRBS3;GLIS3;TMTC2;SLC1A3;RASAL2;CACNA1C;PDZD2;CDH20;MAP2;MAN2A1;NXPH1;LRRC4C;DTNA;PTPRN2;AUTS2;SYT1;CNTN5;CADM1;CADM2;NEBL;SLC4A10;ST18;QKI;PTPRD;SDK…
Finger	4/437	0.542914	0.748704	0	0	1.03539	0.632421	MYT1L;GLIS3;ZNF804A;ZBTB20
3T3-L1 cell	1/88	0.543414	0.748704	0	0	1.28892	0.786093	SORBS1
Hair cell	1/91	0.555483	0.759416	0	0	1.24577	0.73241	PCDH15
Blood platelet	49/5583	0.556088	0.759416	0	0	0.988437	0.580042	RYR2;DOCK4;ATP8A2;MCTP1;SLC44A1;FRMPD4;ADARB2;AFF3;PITPNC1;RYR3;RIMS2;GRM7;PIP4K2A;THSD7A;ERC2;RGS6;RGS7;DST;PDE4D;PRKCA;KCNAB1;ANK3;LRRC7;PARD3;MACF1;KHDRBS2;KHDRBS3;NRXN3;ADCY2;CACNA1C;PDZD2;MAN2A1;DMD;FYN;MAP4K4;AUTS2;NEBL;CADPS;LHFPL3;OXR1;LRP1B;STXBP5L;FAM155A;RALYL;DAB1;FMNL2;NBEA;PPP2R2B;CNTN4
Artery	3/336	0.573703	0.780034	0	0	1.00911	0.560708	MAP2;CACNA1C;SLC8A1
Kidney	150/16989	0.580558	0.785908	0	0	0.984487	0.53533	CHRM3;ATP8A2;MAML2;MYT1L;FRMPD4;CTNND2;ZBTB20;MSI2;ADARB2;SLC8A1;HS6ST3;RIMS2;GRIP1;FAM19A2;TNR;PIP4K2A;THSD7A;MACROD2;RGS6;ANKS1B;RGS7;CALN1;MEF2C;RBFOX1;DSCAM;ARL15;MTUS2;KAZN;FRMD4A;PRKCA;UNC5D;ANK3;GABRG3;KIAA1217;WBSCR17;PARD3;KCNQ3;KCNQ5;ASTN2;KCTD16;GRIA1;GPM6A;GRIA2;MACF1;KHDRBS2;KHDRBS3;PCDH15;GLIS3;TMTC2;SLC1A3;RASAL2;CACNA1C;NPAS3;DPP6;PDZD2;CDH20;MAP2;MAN2A1;NXPH1;LRRC4C;TRPM3;DTNA;PT…
Placenta	140/15885	0.586791	0.790892	0	0	0.980011	0.52243	CHRM3;MAML2;MYT1L;FRMPD4;CTNND2;ZBTB20;MSI2;ADARB2;SLC8A1;HS6ST3;RIMS2;GRIP1;FAM19A2;TNR;PIP4K2A;THSD7A;MACROD2;RGS6;ANKS1B;RGS7;CALN1;MEF2C;RBFOX1;ARL15;MTUS2;KAZN;FRMD4A;PRKCA;UNC5D;ANK3;GABRG3;KIAA1217;PARD3;KCNQ3;ASTN2;KCTD16;GRIA1;GRIA2;MACF1;KHDRBS2;KHDRBS3;PCDH15;GLIS3;TMTC2;SLC1A3;RASAL2;CACNA1C;NPAS3;DPP6;PDZD2;CDH20;MAN2A1;LRRC4C;DTNA;PTPRN2;AUTS2;SYT1;CNTN5;CADM1;CADM2;NEBL;SLC4A10;ST1…
Oral mucosa	93/10627	0.593171	0.796031	0	0	0.976291	0.509889	DPP10;ROBO2;CHRM3;RYR2;TENM2;MAML2;MYT1L;FRMPD4;KCNC2;CTNND2;GRIK1;MSI2;GRIK2;ADARB2;SLC8A1;RYR3;HS6ST3;RIMS2;GRM5;FAM19A2;PDE4B;TNR;DLGAP1;PHACTR1;MACROD2;ZNF385D;ERC2;RGS6;ANKS1B;RGS7;RBFOX1;PDE4D;MTUS2;KAZN;PRKCA;UNC5D;ANK3;GABRG3;KIAA1217;LRRC7;KCNQ3;ASTN2;PLCB1;GRIA2;MACF1;KHDRBS3;PHLPP1;GLIS3;NRXN3;TMTC2;ADCY2;RASAL2;CACNA1C;FSTL5;PDZD2;CDH20;MAP2;MAN2A1;ERBB4;GPC5;DMD;CTNNA3;FYN;NXPH1;CTNN…
Vagina	88/10073	0.598169	0.799278	0	0	0.974207	0.500627	DPP10;ROBO2;CHRM3;RYR2;TENM2;MAML2;FRMPD4;GRIK1;MSI2;GRIK2;ADARB2;AFF3;SLC8A1;PITPNC1;RYR3;HS6ST3;RIMS2;GRIP1;GRM5;FAM19A2;TNR;DLGAP1;PHACTR1;MACROD2;ERC2;RGS6;ANKS1B;RGS7;CALN1;GRID2;DST;ARL15;PDE4D;MTUS2;KAZN;FRMD4A;PRKCA;KCNAB1;UNC5D;ANK3;KIAA1217;PARD3;KCNQ3;ASTN2;PLCB1;KCTD16;GRIA2;MACF1;KHDRBS3;GLIS3;NRXN3;TMTC2;ADCY2;RASAL2;CACNA1C;FSTL5;PDZD2;CDH20;MAN2A1;ERBB4;GPC5;CTNNA3;NXPH1;CTNNA2;CS…
BTO:0000379	3/351	0.603379	0.802779	0	0	0.964873	0.487463	NLGN1;TMTC2;QKI
Spinal ganglion	31/3623	0.613182	0.812335	0	0	0.95944	0.469256	DPP10;MACF1;KHDRBS2;NLGN1;ATP8A2;MCTP1;ZBTB20;FSTL5;PIP4K2A;PHACTR1;GPC5;FYN;CSMD3;LRRC4C;RGS6;CADM1;DST;ATRNL1;LSAMP;KAZN;PRKCA;ANK3;SORBS1;QKI;DAB1;NBEA;LRRC7;TCF4;GALNTL6;CNTN4;FBXL7
Seedling	1/108	0.618117	0.815389	0	0	1.04694	0.50366	MALAT1
NIH-3T3 cell	1/109	0.621515	0.816397	0	0	1.03719	0.493285	FYN
Somatic cell	1/111	0.628221	0.821724	0	0	1.01823	0.473339	MYT1L
Hepatoma cell	2/241	0.63176	0.822881	0	0	0.936473	0.430071	PARD3;RYR3
HUVEC cell	1/113	0.634809	0.823393	0	0	0.999949	0.454408	CADM1
Nerve	1/118	0.650775	0.840585	0	0	0.956974	0.411107	QKI
Neural tube	1/119	0.653884	0.841096	0	0	0.948815	0.40308	ROBO2
Stomach	142/16255	0.681401	0.868381	0	0	0.934153	0.358345	CHRM3;ATP8A2;MAML2;MYT1L;FRMPD4;CTNND2;ZBTB20;MSI2;ADARB2;SLC8A1;HS6ST3;RIMS2;GRIP1;FAM19A2;PIP4K2A;MACROD2;RGS6;ANKS1B;RGS7;CALN1;MEF2C;RBFOX1;ARL15;MTUS2;KAZN;FRMD4A;PRKCA;UNC5D;ANK3;GABRG3;KIAA1217;PARD3;KCNQ3;KCNQ5;ASTN2;KCTD16;GPM6A;GRIA2;MACF1;KHDRBS2;KHDRBS3;GLIS3;CACNA1A;TMTC2;SLC1A3;RASAL2;CACNA1C;NPAS3;DPP6;PDZD2;CDH20;MAP2;MAN2A1;NXPH1;LRRC4C;GRIA4;DTNA;PTPRN2;AUTS2;SYT1;CNTN5;CADM1;CA…
Lung	145/16585	0.682193	0.868381	0	0	0.932434	0.356603	CHRM3;ATP8A2;MAML2;MYT1L;FRMPD4;CTNND2;ZBTB20;MSI2;ADARB2;SLC8A1;RIMS2;GRIP1;FAM19A2;TNR;PIP4K2A;THSD7A;MACROD2;RGS6;ANKS1B;RGS7;CALN1;MEF2C;RBFOX1;ARL15;MTUS2;KAZN;FRMD4A;PRKCA;UNC5D;ANK3;GABRG3;KIAA1217;WBSCR17;PARD3;KCNQ3;KCNQ5;ASTN2;KCTD16;GRIA1;GPM6A;GRIA2;MACF1;KHDRBS2;KHDRBS3;PCDH15;GLIS3;CACNA1A;TMTC2;SLC1A3;RASAL2;CACNA1C;NPAS3;DPP6;PDZD2;CDH20;MAP2;MAN2A1;NXPH1;LRRC4C;TMEM132D;DTNA;PTPR…
Blastocyst	1/129	0.6835	0.868381	0	0	0.874245	0.332676	TCF4
Root nodule	1/131	0.689113	0.871939	0	0	0.860708	0.320485	NEGR1
Larynx	2/275	0.702304	0.881435	0	0	0.81842	0.28922	NRXN3;CALN1
Bronchus	109/12644	0.704341	0.881435	0	0	0.931969	0.326648	CHRM3;MAML2;FRMPD4;CTNND2;ZBTB20;MSI2;ADARB2;HS6ST3;RIMS2;GRIP1;FAM19A2;MACROD2;RGS6;ANKS1B;RGS7;CALN1;MEF2C;ARL15;MTUS2;KAZN;FRMD4A;PRKCA;UNC5D;ANK3;GABRG3;KIAA1217;KCNQ3;KCNQ5;ASTN2;KCTD16;GPM6A;GRIA2;MACF1;KHDRBS2;KHDRBS3;GLIS3;SLC1A2;TMTC2;RASAL2;CACNA1C;PDZD2;CDH20;MAP2;MAN2A1;LRRC4C;AUTS2;CNTN5;CADM1;CADM2;NEBL;SLC4A10;QKI;PTPRD;SDK1;DLG2;DAB1;NBEA;TCF4;XKR4;RNF220;DPP10;ROBO2;RYR2;TENM2;KC…
Keratinocyte	1/137	0.705366	0.881435	0	0	0.822485	0.287079	DST
Neural crest	1/138	0.707992	0.881435	0	0	0.81644	0.281935	MIR99AHG
T-lymphocyte	2/280	0.71168	0.882483	0	0	0.803494	0.27329	FYN;RYR3
Fibroblast	1/141	0.715729	0.883969	0	0	0.798823	0.267169	CACNA1C
Salivary gland	133/15335	0.720463	0.886284	0	0	0.918828	0.301248	CHRM3;ATP8A2;MAML2;MYT1L;FRMPD4;CTNND2;ZBTB20;MSI2;ADARB2;SLC8A1;HS6ST3;RIMS2;GRIP1;FAM19A2;PIP4K2A;MACROD2;RGS6;ANKS1B;RGS7;CALN1;MEF2C;RBFOX1;ARL15;MTUS2;KAZN;FRMD4A;PRKCA;UNC5D;ANK3;GABRG3;KIAA1217;WBSCR17;PARD3;KCNQ3;ASTN2;KCTD16;GRIA1;GRIA2;MACF1;KHDRBS2;KHDRBS3;GLIS3;SLC1A2;TMTC2;SLC1A3;RASAL2;PDZD2;CDH20;MAP2;MAN2A1;NXPH1;LRRC4C;GRIA4;DTNA;PTPRN2;AUTS2;SYT1;CNTN5;CADM1;NEBL;SLC4A10;ST18;QK…
Oviduct	105/12240	0.724407	0.887614	0	0	0.923912	0.29787	CHRM3;ATP8A2;MAML2;MYT1L;FRMPD4;CTNND2;ZBTB20;MSI2;ADARB2;SLC8A1;HS6ST3;RIMS2;GRIP1;FAM19A2;MACROD2;RGS6;ANKS1B;RGS7;MEF2C;ARL15;MTUS2;KAZN;FRMD4A;PRKCA;UNC5D;ANK3;GABRG3;KIAA1217;PARD3;KCNQ3;ASTN2;KCTD16;GRIA2;MACF1;KHDRBS2;KHDRBS3;GLIS3;TMTC2;RASAL2;NPAS3;PDZD2;CDH20;MAP2;MAN2A1;NXPH1;LRRC4C;DTNA;AUTS2;CNTN5;CADM1;CADM2;NEBL;ST18;PTPRD;SDK1;RALYL;DLG2;NBEA;TCF4;XKR4;DPP10;ROBO2;RYR2;TENM2;KCNC2…
Tonsil	119/13827	0.738371	0.901162	0	0	0.915253	0.277604	CHRM3;ATP8A2;MAML2;FRMPD4;CTNND2;ZBTB20;MSI2;ADARB2;SLC8A1;HS6ST3;RIMS2;GRIP1;FAM19A2;TNR;PIP4K2A;MACROD2;RGS6;ANKS1B;RGS7;MEF2C;RBFOX1;MTUS2;KAZN;FRMD4A;PRKCA;UNC5D;ANK3;GABRG3;KCNQ3;KCNQ5;ASTN2;KCTD16;GRIA1;GRIA2;MACF1;KHDRBS2;KHDRBS3;GLIS3;TMTC2;RASAL2;CACNA1C;NPAS3;PDZD2;CDH20;MAP2;MAN2A1;NXPH1;LRRC4C;PTPRN2;AUTS2;CNTN5;CADM1;CADM2;NEBL;ST18;QKI;PTPRD;SDK1;DLG2;DAB1;NBEA;TCF4;GALNTL6;CNTN4;XK…
Urinary bladder	139/16036	0.744799	0.905442	0	0	0.903371	0.26617	CHRM3;MAML2;DGKB;FRMPD4;CTNND2;ZBTB20;MSI2;ADARB2;SLC8A1;HS6ST3;RIMS2;GRIP1;FAM19A2;TNR;PIP4K2A;THSD7A;MACROD2;RGS6;ANKS1B;RGS7;CALN1;MEF2C;RBFOX1;ARL15;MTUS2;KAZN;FRMD4A;PRKCA;UNC5D;ANK3;GABRG3;KIAA1217;WBSCR17;PARD3;KCNQ3;ASTN2;KCTD16;GRIA1;GPM6A;GRIA2;MACF1;KHDRBS2;KHDRBS3;GLIS3;TMTC2;SLC1A3;RASAL2;CACNA1C;NPAS3;DPP6;PDZD2;CDH20;MAP2;MAN2A1;NXPH1;LRRC4C;TRPM3;GRIA4;TMEM132D;DTNA;PTPRN2;AUTS2;C…
Muscle	14/1841	0.762033	0.922774	0	0	0.846015	0.229918	MACF1;MEF2C;RBFOX1;DST;ARL15;SLC1A2;PRKCA;RASAL2;OXR1;QKI;RYR3;MAP2;DMD;CALN1
Teratocarcinoma cell	4/592	0.772483	0.931789	0	0	0.75636	0.19525	CHRM3;DTNA;NRXN3;TCF4
Uterine cervix	100/11814	0.781622	0.939158	0	0	0.899024	0.221506	CHRM3;MAML2;FRMPD4;CTNND2;MSI2;ADARB2;SLC8A1;HS6ST3;RIMS2;GRIP1;FAM19A2;TNR;MACROD2;RGS6;ANKS1B;RGS7;CALN1;MEF2C;ARL15;MTUS2;KAZN;FRMD4A;PRKCA;UNC5D;ANK3;GABRG3;KIAA1217;KCNQ3;KCNQ5;ASTN2;GRIA2;MACF1;KHDRBS3;GLIS3;TMTC2;RASAL2;CACNA1C;NPAS3;PDZD2;CDH20;MAN2A1;NXPH1;LRRC4C;DTNA;PTPRN2;CNTN5;CADM1;NEBL;ST18;PTPRD;SDK1;DLG2;DAB1;NBEA;TCF4;CNTN4;XKR4;DPP10;ROBO2;RYR2;TENM2;KCNC2;GRIK1;GRIK2;AFF3;PITP…
Spleen	128/14937	0.793746	0.947543	0	0	0.884448	0.2043	CHRM3;ATP8A2;MAML2;MYT1L;FRMPD4;CTNND2;ZBTB20;MSI2;ADARB2;SLC8A1;RIMS2;GRIP1;FAM19A2;TNR;PIP4K2A;THSD7A;MACROD2;RGS6;ANKS1B;RGS7;CALN1;MEF2C;ARL15;MTUS2;KAZN;FRMD4A;PRKCA;UNC5D;ANK3;GABRG3;KIAA1217;WBSCR17;PARD3;KCNQ3;KCNQ5;ASTN2;KCTD16;GRIA1;GPM6A;GRIA2;MACF1;KHDRBS2;KHDRBS3;GLIS3;TMTC2;SLC1A3;RASAL2;CACNA1C;NPAS3;DPP6;PDZD2;CDH20;SNTG1;MAP2;MAN2A1;NXPH1;DTNA;PTPRN2;AUTS2;SYT1;CNTN5;CADM1;CADM2;…
Trachea	6/882	0.797728	0.947543	0	0	0.758912	0.171504	MACF1;DST;PDE4D;PDE4B;RASAL2;OXR1
Ovary cancer cell	1/179	0.79777	0.947543	0	0	0.627075	0.141678	PARD3
Gut	64/7807	0.80619	0.953889	0	0	0.883607	0.19036	ROBO2;CHRM3;SLC44A1;MYT1L;FRMPD4;ADARB2;RIMS2;PDE4B;PIP4K2A;ERC2;RGS6;ANKS1B;RGS7;CALN1;RBFOX1;DST;PDE4D;FRMD4A;PRKCA;KCNAB1;ANK3;KIAA1217;LRRC7;PARD3;KCTD16;MACF1;KHDRBS2;NLGN1;KHDRBS3;PCDH15;ADCY2;CACNA1C;MAP2;MAN2A1;ERBB4;GPC5;DMD;CTNNA3;FYN;CTNNA2;MAP4K4;OPCML;DTNA;SYT1;CADM1;NEGR1;NEBL;ATRNL1;CADPS;LSAMP;SORBS1;OXR1;LRP1B;QKI;PTPRD;RALYL;DLG2;DAB1;FMNL2;NBEA;NFIA;PPP2R2B;TCF4;CNTN4
Ear	1/186	0.81008	0.954847	0	0	0.603133	0.127033	QKI
Leukocyte	1/203	0.836959	0.982793	0	0	0.551896	0.0982263	PIP4K2A
Breast cancer cell	1/221	0.861305	0.999995	0	0	0.506276	0.0755901	ERBB4
Breast cancer cell line	1/227	0.868589	0.999995	0	0	0.492684	0.0694122	ERBB4
Duodenum	134/15789	0.874783	0.999995	0	0	0.829681	0.110994	CHRM3;ATP8A2;MAML2;MYT1L;FRMPD4;CTNND2;MSI2;ADARB2;SLC8A1;RIMS2;GRIP1;FAM19A2;TNR;PIP4K2A;MACROD2;RGS6;ANKS1B;RGS7;CALN1;MEF2C;RBFOX1;ARL15;MTUS2;KAZN;FRMD4A;PRKCA;UNC5D;ANK3;GABRG3;KIAA1217;PARD3;KCNQ3;KCNQ5;ASTN2;KCTD16;GPM6A;GRIA2;MACF1;KHDRBS2;KHDRBS3;GLIS3;CACNA1A;TMTC2;SLC1A3;RASAL2;CACNA1C;PDZD2;CDH20;MAN2A1;NXPH1;LRRC4C;DTNA;PTPRN2;AUTS2;SYT1;CNTN5;CADM1;CADM2;NEBL;SLC4A10;ST18;QKI;PTPRD;…
Colonic cancer cell	3/563	0.878576	0.999995	0	0	0.593073	0.0767746	NEBL;MSI2;QKI
Liver	138/16290	0.90029	0.999995	0	0	0.804216	0.0844735	CHRM3;ATP8A2;MAML2;FRMPD4;CTNND2;ZBTB20;MSI2;ADARB2;SLC8A1;RIMS2;GRIP1;FAM19A2;TNR;PIP4K2A;THSD7A;MACROD2;RGS6;ANKS1B;RGS7;CALN1;MEF2C;RBFOX1;ARL15;MTUS2;KAZN;FRMD4A;PRKCA;ANK3;GABRG3;KIAA1217;PARD3;KCNQ3;KCNQ5;ASTN2;KCTD16;GPM6A;GRIA2;MACF1;KHDRBS2;KHDRBS3;PCDH15;GLIS3;SLC1A2;CACNA1A;TMTC2;SLC1A3;RASAL2;PDZD2;CDH20;MAP2;MAN2A1;NXPH1;LRRC4C;TRPM3;DTNA;PTPRN2;AUTS2;CNTN5;CADM1;CADM2;NEBL;SLC4A10;L…
Bone marrow	121/14508	0.907744	0.999995	0	0	0.816407	0.0790226	CHRM3;ATP8A2;MAML2;MYT1L;FRMPD4;CTNND2;ZBTB20;MSI2;ADARB2;SLC8A1;RIMS2;GRIP1;FAM19A2;TNR;PIP4K2A;RGS6;ANKS1B;RGS7;CALN1;MEF2C;ARL15;MTUS2;KAZN;FRMD4A;PRKCA;UNC5D;ANK3;GABRG3;KIAA1217;PARD3;KCNQ3;KCNQ5;ASTN2;KCTD16;GRIA1;GPM6A;GRIA2;MACF1;KHDRBS2;KHDRBS3;GLIS3;TMTC2;SLC1A3;RASAL2;CACNA1C;PDZD2;MAP2;MAN2A1;NXPH1;LRRC4C;PTPRN2;AUTS2;CNTN5;CADM1;CADM2;ST18;QKI;PTPRD;SDK1;DAB1;NBEA;TCF4;GALNTL6;CNTN4;…
Thyroid gland	113/13652	0.910278	0.999995	0	0	0.819498	0.0770367	CHRM3;ATP8A2;MAML2;CTNND2;ZBTB20;MSI2;SLC8A1;HS6ST3;RIMS2;GRIP1;FAM19A2;PIP4K2A;THSD7A;MACROD2;RGS6;ANKS1B;CALN1;MEF2C;ARL15;MTUS2;KAZN;FRMD4A;PRKCA;UNC5D;ANK3;GABRG3;KIAA1217;WBSCR17;PARD3;KCNQ5;GPM6A;MACF1;KHDRBS2;KHDRBS3;GLIS3;TMTC2;SLC1A3;RASAL2;CACNA1C;NPAS3;DPP6;PDZD2;MAP2;MAN2A1;NXPH1;LRRC4C;DTNA;PTPRN2;AUTS2;CNTN5;CADM1;CADM2;NEBL;LRP1B;ST18;QKI;PTPRD;DLG2;DAB1;NBEA;TCF4;GALNTL6;CNTN4;XKR…
Mouth	6/1073	0.918093	0.999995	0	0	0.616781	0.0527082	KIAA1217;PDZD2;DST;RASAL2;CALN1;MAP4K4
Tongue	2/463	0.918677	0.999995	0	0	0.48	0.0407141	DST;FAM19A2
T-cell chronic lymphocytic leukemia cell	15/2344	0.934086	0.999995	0	0	0.695498	0.047424	MACF1;CNTNAP2;WWOX;DOCK4;AUTS2;CADM1;FRMPD4;LSAMP;ZBTB20;PRKCA;OXR1;RIMS2;NFIA;PARD3;MAP4K4
Esophagus	129/15560	0.950157	0.999995	0	0	0.764921	0.0391092	CHRM3;MAML2;FRMPD4;CTNND2;MSI2;ADARB2;SLC8A1;HS6ST3;RIMS2;GRIP1;FAM19A2;TNR;PIP4K2A;MACROD2;RGS6;ANKS1B;RGS7;CALN1;MEF2C;RBFOX1;ARL15;MTUS2;KAZN;FRMD4A;PRKCA;ANK3;GABRG3;KIAA1217;WBSCR17;PARD3;KCNQ3;KCNQ5;ASTN2;KCTD16;GPM6A;GRIA2;MACF1;KHDRBS3;GLIS3;TMTC2;SLC1A3;RASAL2;CACNA1C;PDZD2;CDH20;MAP2;MAN2A1;NXPH1;LRRC4C;DTNA;PTPRN2;AUTS2;CNTN5;CADM1;CADM2;NEBL;SLC4A10;ST18;QKI;PTPRD;SDK1;RALYL;DLG2;DAB1…
Pharynx	2/541	0.954474	0.999995	0	0	0.408884	0.0190518	MEF2C;TCF4
Melanoma cell line	1/347	0.955475	0.999995	0	0	0.31984	0.0145678	TMTC2
Bone	7/1374	0.963626	0.999995	0	0	0.555928	0.020598	MACF1;DLG2;DST;PRKCA;TCF4;CALN1;MAP4K4
Adrenal cortex	31/4574	0.966765	0.999995	0	0	0.71415	0.024138	DPP10;MACF1;KHDRBS2;NLGN1;ATP8A2;KHDRBS3;MCTP1;SLC44A1;ZBTB20;GRIK1;RIMS2;FSTL5;PHACTR1;GPC5;CSMD3;LRRC4C;RGS6;CADM1;DST;ATRNL1;LSAMP;KAZN;QKI;SDK1;DAB1;NBEA;LRRC7;TCF4;GALNTL6;CNTN4;FBXL7
Parenchyma	35/5163	0.975836	0.999995	0	0	0.70632	0.0172773	GRIA1;MACF1;KHDRBS2;NLGN1;KHDRBS3;MCTP1;SLC44A1;GRIK1;PITPNC1;NPAS3;FSTL5;PIP4K2A;DLGAP1;GPC5;FYN;CSMD3;LRRC4C;ERC2;RGS6;MAP4K4;CADM1;DST;ATRNL1;SLC4A10;LSAMP;ANK3;QKI;DAB1;NBEA;LRRC7;TCF4;GALNTL6;CNTN4;PLCB1;FBXL7
Small intestine	43/6152	0.976596	0.999995	0	0	0.720373	0.0170603	DPP10;CHRM3;MACF1;CNTNAP2;KHDRBS2;NLGN1;MCTP1;NRXN1;AFF3;HS6ST3;FSTL5;PDZD2;MAN2A1;ERBB4;PIP4K2A;GPC5;FYN;CSMD3;LRRC4C;RGS6;RGS7;GRIA4;MEF2C;GRID2;AUTS2;CADM1;DST;NEBL;ATRNL1;LSAMP;FRMD4A;PRKCA;ANK3;SORBS1;QKI;DAB1;NBEA;LRRC7;PPP2R2B;TCF4;GALNTL6;CNTN4;FBXL7
Bladder	1/443	0.981356	0.999995	0	0	0.249139	0.00468867	DST
Prostate gland epithelium	1/450	0.982506	0.999995	0	0	0.245166	0.00432689	PTPRG
Immune system	4/1046	0.984657	0.999995	0	0	0.41674	0.00644376	CNTN5;CADM1;TCF4;FYN
MOLT-4 cell	28/4430	0.986028	0.999995	0	0	0.658316	0.00926265	DPP10;MACF1;KHDRBS2;NLGN1;ATP8A2;MCTP1;PITPNC1;FSTL5;PIP4K2A;PHACTR1;GPC5;FYN;CSMD3;LRRC4C;RGS6;MAP4K4;PTPRN2;ATRNL1;LSAMP;KAZN;PRKCA;QKI;DAB1;NBEA;LRRC7;GALNTL6;CNTN4;FBXL7
Pronephros	2/709	0.987644	0.999995	0	0	0.309008	0.00384194	ANK3;SLC8A1
Cervical carcinoma cell	31/4876	0.989115	0.999995	0	0	0.6564	0.00718416	DPP10;MACF1;DOCK4;PHLPP1;SLC44A1;ZBTB20;SLC1A3;MSI2;RASAL2;AFF3;PITPNC1;RYR3;MAP2;PIP4K2A;DMD;FYN;MAP4K4;DST;NEGR1;PDE4D;PCDH7;PRKCA;ANK3;SORBS1;OXR1;KIAA1217;DLG2;FMNL2;NFIA;PARD3;RNF220
Lymph node	118/14834	0.989909	0.999995	0	0	0.694074	0.00703974	CHRM3;ATP8A2;MAML2;FRMPD4;CTNND2;ZBTB20;MSI2;ADARB2;SLC8A1;RIMS2;GRIP1;FAM19A2;PIP4K2A;MACROD2;RGS6;ANKS1B;RGS7;MEF2C;ARL15;MTUS2;KAZN;FRMD4A;PRKCA;UNC5D;ANK3;GABRG3;KIAA1217;PARD3;KCNQ3;KCNQ5;ASTN2;KCTD16;GRIA1;GPM6A;GRIA2;MACF1;KHDRBS2;KHDRBS3;GLIS3;TMTC2;SLC1A3;RASAL2;PDZD2;CDH20;MAP2;MAN2A1;NXPH1;LRRC4C;DTNA;PTPRN2;AUTS2;CNTN5;CADM1;CADM2;NEBL;ST18;QKI;PTPRD;SDK1;DAB1;NBEA;TCF4;GALNTL6;CNTN4;…
Skin	125/15601	0.991822	0.999995	0	0	0.675208	0.00554486	CHRM3;ATP8A2;MAML2;FRMPD4;ZBTB20;MSI2;ADARB2;SLC8A1;HS6ST3;RIMS2;GRIP1;FAM19A2;PIP4K2A;MACROD2;RGS6;ANKS1B;RGS7;CALN1;MEF2C;ARL15;MTUS2;KAZN;FRMD4A;PRKCA;ANK3;KIAA1217;PARD3;KCNQ3;ASTN2;KCTD16;GRIA2;MACF1;KHDRBS2;KHDRBS3;GLIS3;TMTC2;SLC1A3;RASAL2;CACNA1C;DPP6;PDZD2;CDH20;MAP2;MAN2A1;NXPH1;LRRC4C;TMEM132D;PTPRN2;AUTS2;CNTN5;CADM1;NEBL;ST18;QKI;PTPRD;SDK1;RALYL;DLG2;DAB1;NBEA;TCF4;GALNTL6;CNTN4;XKR…
Erythroid cell	27/4448	0.99234	0.999995	0	0	0.627089	0.00482188	DPP10;KHDRBS2;NLGN1;ATP8A2;MCTP1;FSTL5;MAN2A1;PIP4K2A;PHACTR1;GPC5;CSMD3;LRRC4C;RGS6;MAP4K4;CADM1;DST;ATRNL1;LSAMP;KAZN;QKI;DAB1;NBEA;LRRC7;DLC1;GALNTL6;CNTN4;FBXL7
Pancreatic islet	31/4972	0.992609	0.999995	0	0	0.639522	0.00474444	DPP10;MACF1;KHDRBS2;NLGN1;ATP8A2;KHDRBS3;MCTP1;ZBTB20;PITPNC1;FSTL5;MAN2A1;PHACTR1;GPC5;FYN;CSMD3;LRRC4C;RGS6;PTPRN2;CADM1;DST;NEBL;ATRNL1;LSAMP;QKI;DAB1;NBEA;LRRC7;TCF4;GALNTL6;CNTN4;FBXL7
B-lymphocyte	57/8270	0.995206	0.999995	0	0	0.671466	0.00322682	RYR2;CNTNAP2;DOCK4;ATP8A2;SLC44A1;DGKB;FRMPD4;MSI2;AFF3;RIMS2;PDE4B;PIP4K2A;DLGAP1;ERC2;ANKS1B;MEF2C;GRID2;DST;PDE4D;PRKCA;KCNAB1;ANK3;LRRC7;PLCB1;KCTD16;GPM6A;MACF1;KHDRBS2;KHDRBS3;LUZP2;PCDH15;ADCY2;RASAL2;MAP2;MAN2A1;DMD;FYN;CTNNA2;LRRC4C;TRPM3;MAP4K4;CNTN5;NEBL;CADPS;OXR1;LRP1B;QKI;STXBP5L;PTPRD;RALYL;FMNL2;NBEA;NFIA;PPP2R2B;TCF4;CNTN4;RNF220
BTO:0004410	65/9290	0.996538	0.999995	0	0	0.666734	0.00231201	RYR2;DOCK4;ATP8A2;MCTP1;MAML2;DGKB;FRMPD4;MSI2;GRIK2;AFF3;PITPNC1;RIMS2;GRM5;PDE4B;PIP4K2A;MACROD2;ERC2;CALN1;MEF2C;GRID2;DSCAM;DST;PDE4D;KAZN;PRKCA;KCNAB1;ANK3;KIAA1217;LRRC7;KCNQ3;KCTD16;MACF1;KHDRBS2;KHDRBS3;PHLPP1;LUZP2;CACNA1A;ADCY2;RASAL2;NPAS3;FSTL5;MAP2;MAN2A1;DMD;FYN;CTNNA2;LRRC4C;CSMD1;MAP4K4;DTNA;NEBL;OXR1;LRP1B;QKI;RALYL;DLG2;FMNL2;NBEA;NFIA;PPP2R2B;DLC1;TCF4;CNTN4;MDGA2;RNF220
Thymus	29/4940	0.997225	0.999995	0	0	0.59498	0.00165338	MACF1;KHDRBS2;NLGN1;ATP8A2;MCTP1;ZBTB20;CACNA1C;PITPNC1;FSTL5;PIP4K2A;PHACTR1;GPC5;FYN;CSMD3;LRRC4C;RGS6;AUTS2;CADM1;DST;ATRNL1;LSAMP;QKI;DAB1;NBEA;LRRC7;TCF4;GALNTL6;CNTN4;FBXL7
Vascular system	2/894	0.997242	0.999995	0	0	0.24255	0.000669762	DLC1;TCF4
Natural killer cell	66/9530	0.997917	0.999995	0	0	0.650825	0.00135712	CHRM3;RYR2;DOCK4;ATP8A2;MCTP1;SLC44A1;DGKB;FRMPD4;ZBTB20;MSI2;GRIK2;PITPNC1;RYR3;GRM5;LRRTM4;PDE4B;PIP4K2A;PHACTR1;MACROD2;ERC2;RGS6;MEF2C;DST;PDE4D;PRKCA;KCNAB1;UNC5D;LRRC7;PLCB1;KCTD16;MACF1;KHDRBS2;NLGN1;KHDRBS3;LUZP2;NRXN3;CACNA1A;RASAL2;FSTL5;MAN2A1;GPC5;DMD;FYN;CTNNA2;CSMD3;LRRC4C;MAP4K4;WWOX;AUTS2;CADM1;NEBL;ATRNL1;PCDH7;LSAMP;OXR1;QKI;RALYL;DAB1;FMNL2;NBEA;PPP2R2B;TCF4;GALNTL6;CNTN4;MDGA2…
Uterus	95/12771	0.997939	0.999995	0	0	0.653208	0.00134757	ROBO2;CHRM3;DOCK4;ATP8A2;MCTP1;MAML2;SLC44A1;DGKB;ZBTB20;MSI2;AFF3;SLC8A1;PITPNC1;RYR3;PTPRG;RIMS2;GRIP1;GRM7;PDE4B;PIP4K2A;THSD7A;MACROD2;ZNF385D;ANKS1B;CALN1;MEF2C;DST;KCND2;ARL15;PDE4D;MTUS2;KAZN;FRMD4A;PRKCA;KCNAB1;ANK3;SYN3;KIAA1217;WBSCR17;PARD3;ASTN2;PLCB1;GPM6A;GRIA2;MACF1;NLGN1;KHDRBS3;PHLPP1;GLIS3;NRXN3;TMTC2;SLC1A3;ADCY2;RASAL2;CACNA1C;NPAS3;DPP6;PDZD2;MAP2;MAN2A1;DMD;FYN;CTNNA2;MAP4K4…
BTO:0005453	46/7164	0.998027	0.999995	0	0	0.626763	0.00123767	DPP10;MACF1;KHDRBS2;KHDRBS3;PHLPP1;SLC44A1;DGKB;FRMPD4;LUZP2;PCDH15;NRXN3;MSI2;RASAL2;ADARB2;PITPNC1;RIMS2;MAN2A1;PDE4B;PIP4K2A;DMD;FYN;CSMD1;MAP4K4;GRID2;DTNA;DSCAM;DST;NEBL;PDE4D;KAZN;PRKCA;KCNAB1;ANK3;OXR1;LRP1B;QKI;RALYL;FMNL2;NBEA;NFIA;LRRC7;PPP2R2B;FBXL7;KCTD16;RNF220;HCN1
Erythroleukemia cell	23/4265	0.998466	0.999995	0	0	0.54857	0.000842289	MACF1;MEF2C;MAML2;DST;KAZN;FRMD4A;PRKCA;GRIK1;MSI2;ANK3;SORBS1;OXR1;QKI;NFIA;PARD3;DLC1;PIP4K2A;KCNQ5;TCF4;PHACTR1;DMD;FYN;MAP4K4
Helper T-lymphocyte	30/5270	0.998907	0.999995	0	0	0.567962	0.000621049	MACF1;KHDRBS2;NLGN1;ATP8A2;MCTP1;ZBTB20;PITPNC1;FSTL5;MAN2A1;PDE4B;PIP4K2A;PHACTR1;GPC5;FYN;CSMD3;LRRC4C;RGS6;MAP4K4;AUTS2;DST;ATRNL1;LSAMP;ANK3;QKI;DAB1;NBEA;LRRC7;GALNTL6;CNTN4;FBXL7
Lymph	1/784	0.99918	0.999995	0	0	0.138163	0.000113302	MAP4K4
Cytotoxic T-lymphocyte	29/5212	0.999238	0.999995	0	0	0.553473	0.000421689	DPP10;MACF1;KHDRBS2;NLGN1;ATP8A2;MCTP1;ZBTB20;PITPNC1;FSTL5;MAN2A1;PDE4B;PIP4K2A;PHACTR1;GPC5;FYN;CSMD3;LRRC4C;RGS6;MAP4K4;AUTS2;ATRNL1;LSAMP;QKI;DAB1;NBEA;LRRC7;GALNTL6;CNTN4;FBXL7
Dendritic cell	32/5660	0.999415	0.999995	0	0	0.556626	0.000325923	MACF1;KHDRBS2;NLGN1;ATP8A2;MCTP1;ZBTB20;AFF3;FSTL5;MAN2A1;PDE4B;PIP4K2A;PHACTR1;GPC5;FYN;CSMD3;LRRC4C;RGS6;MAP4K4;MEF2C;AUTS2;DST;ATRNL1;LSAMP;OXR1;QKI;DAB1;NBEA;LRRC7;TCF4;GALNTL6;CNTN4;FBXL7
Bronchial epithelial cell	25/4837	0.999671	0.999995	0	0	0.513074	0.000168766	DPP10;MACF1;KHDRBS2;NLGN1;ATP8A2;MCTP1;FSTL5;MAN2A1;PHACTR1;GPC5;CSMD3;LRRC4C;RGS6;MAP4K4;DST;ATRNL1;LSAMP;KAZN;QKI;DAB1;NBEA;LRRC7;GALNTL6;CNTN4;FBXL7
Ascites	1/884	0.999674	0.999995	0	0	0.121873	3.97384e-05	PRKCA
Monocyte	46/7640	0.999783	0.999995	0	0	0.565467	0.000122635	DPP10;MACF1;KHDRBS2;DOCK4;NLGN1;ATP8A2;KHDRBS3;MCTP1;SLC44A1;FRMPD4;GRIK1;PITPNC1;PTPRG;RIMS2;FSTL5;MAN2A1;PDE4B;PIP4K2A;PHACTR1;GPC5;FYN;CSMD3;LRRC4C;RGS6;MAP4K4;MEF2C;DST;NEBL;ATRNL1;PDE4D;LSAMP;PRKCA;OXR1;LRP1B;QKI;RALYL;DAB1;FMNL2;NBEA;LRRC7;PPP2R2B;TCF4;GALNTL6;CNTN4;FBXL7;KCTD16
B-lymphoblastoid cell	31/5983	0.999944	0.999995	0	0	0.494827	2.77285e-05	GPM6A;MACF1;KHDRBS2;NLGN1;ATP8A2;MCTP1;PHLPP1;CACNA1A;FSTL5;MAN2A1;PIP4K2A;PHACTR1;GPC5;FYN;CSMD3;LRRC4C;RGS6;MEF2C;AUTS2;DST;ATRNL1;LSAMP;QKI;DAB1;FMNL2;NBEA;LRRC7;TCF4;GALNTL6;CNTN4;FBXL7
Blood	30/6006	0.999975	0.999995	0	0	0.472878	1.20417e-05	MACF1;KHDRBS2;NLGN1;ATP8A2;MCTP1;PITPNC1;FSTL5;GRM5;PDE4B;PIP4K2A;PHACTR1;GPC5;FYN;CSMD3;LRRC4C;RGS6;MAP4K4;MEF2C;ATRNL1;LSAMP;PRKCA;QKI;DAB1;NBEA;LRRC7;TCF4;GALNTL6;CNTN4;FBXL7;RNF220
Adipose tissue	69/12174	0.999995	0.999995	0	0	0.407348	2.19332e-06	DOCK4;MCTP1;MAML2;SLC44A1;ZBTB20;MSI2;AFF3;SLC8A1;PITPNC1;PTPRG;PDE4B;PIP4K2A;PHACTR1;THSD7A;ZNF385D;RGS6;MEF2C;DST;KCND2;ARL15;PDE4D;KAZN;FRMD4A;PRKCA;KCNAB1;ANK3;SYN3;KIAA1217;PARD3;PLCB1;MACF1;NLGN1;KHDRBS3;PHLPP1;TMTC2;SLC1A3;RASAL2;CACNA1C;PDZD2;CDH20;MAP2;MAN2A1;ERBB4;DMD;FYN;MAP4K4;OPCML;WWOX;DTNA;AUTS2;CADM1;PCDH9;NEGR1;CADM2;NEBL;PCDH7;LHFPL3;SORBS1;GRIN2B;OXR1;QKI;PTPRD;FMNL2;NBEA;NFIA;…
Intestine	21/5377	0.999995	0.999995	0	0	0.363607	1.95458e-06	MACF1;AUTS2;SLC44A1;DST;PCDH9;NEBL;TMTC2;PRKCA;RASAL2;SORBS1;OXR1;QKI;RYR3;PTPRG;KIAA1217;CDH20;TCF4;DMD;CALN1;RNF220;MAP4K4
