# Supplementary material for: A tensor decomposition-based integrated analysis applicable to multiple gene expression profiles without sample matching
Source: Research Square preprint supplement (doi:10.21203/rs.3.rs-766884/v2), 2021-11-03
Supplement: Supplementary file 6 [file 25a744aad420604d4a59dd06.xlsx]

## Sheet: ensembl gene
1	ENSG00000002834
2	ENSG00000006125
3	ENSG00000007168
4	ENSG00000008710
5	ENSG00000008988
6	ENSG00000009307
7	ENSG00000009954
8	ENSG00000010404
9	ENSG00000011304
10	ENSG00000011422
11	ENSG00000011600
12	ENSG00000015479
13	ENSG00000015592
14	ENSG00000018189
15	ENSG00000018236
16	ENSG00000026025
17	ENSG00000030582
18	ENSG00000031698
19	ENSG00000034510
20	ENSG00000044574
21	ENSG00000046653
22	ENSG00000047410
23	ENSG00000047849
24	ENSG00000048740
25	ENSG00000052802
26	ENSG00000053438
27	ENSG00000054523
28	ENSG00000054793
29	ENSG00000060982
30	ENSG00000063046
31	ENSG00000063177
32	ENSG00000065978
33	ENSG00000066735
34	ENSG00000067225
35	ENSG00000067560
36	ENSG00000067840
37	ENSG00000069275
38	ENSG00000069482
39	ENSG00000070087
40	ENSG00000070756
41	ENSG00000070831
42	ENSG00000071082
43	ENSG00000072110
44	ENSG00000072832
45	ENSG00000074800
46	ENSG00000075415
47	ENSG00000075618
48	ENSG00000075624
49	ENSG00000077097
50	ENSG00000077279
51	ENSG00000078018
52	ENSG00000078369
53	ENSG00000079246
54	ENSG00000079459
55	ENSG00000080644
56	ENSG00000080824
57	ENSG00000082641
58	ENSG00000083845
59	ENSG00000084070
60	ENSG00000084073
61	ENSG00000084207
62	ENSG00000084234
63	ENSG00000084731
64	ENSG00000086061
65	ENSG00000086758
66	ENSG00000087074
67	ENSG00000087086
68	ENSG00000087460
69	ENSG00000088247
70	ENSG00000089009
71	ENSG00000089157
72	ENSG00000089199
73	ENSG00000089220
74	ENSG00000089280
75	ENSG00000089597
76	ENSG00000090621
77	ENSG00000092199
78	ENSG00000092841
79	ENSG00000092964
80	ENSG00000094916
81	ENSG00000095787
82	ENSG00000096384
83	ENSG00000099194
84	ENSG00000099622
85	ENSG00000100097
86	ENSG00000100129
87	ENSG00000100167
88	ENSG00000100201
89	ENSG00000100316
90	ENSG00000100320
91	ENSG00000100345
92	ENSG00000100353
93	ENSG00000100604
94	ENSG00000100823
95	ENSG00000100985
96	ENSG00000101126
97	ENSG00000101210
98	ENSG00000101255
99	ENSG00000101444
100	ENSG00000101856
101	ENSG00000102003
102	ENSG00000102109
103	ENSG00000102226
104	ENSG00000102265
105	ENSG00000102316
106	ENSG00000102804
107	ENSG00000103034
108	ENSG00000103257
109	ENSG00000104408
110	ENSG00000104435
111	ENSG00000104549
112	ENSG00000104722
113	ENSG00000104904
114	ENSG00000105193
115	ENSG00000105223
116	ENSG00000105281
117	ENSG00000105290
118	ENSG00000105323
119	ENSG00000105372
120	ENSG00000105409
121	ENSG00000105426
122	ENSG00000105568
123	ENSG00000105640
124	ENSG00000105810
125	ENSG00000105894
126	ENSG00000106105
127	ENSG00000106153
128	ENSG00000106278
129	ENSG00000107485
130	ENSG00000107581
131	ENSG00000107731
132	ENSG00000108001
133	ENSG00000108107
134	ENSG00000108175
135	ENSG00000108298
136	ENSG00000108424
137	ENSG00000108518
138	ENSG00000108654
139	ENSG00000108828
140	ENSG00000108953
141	ENSG00000109472
142	ENSG00000109475
143	ENSG00000109654
144	ENSG00000109685
145	ENSG00000109971
146	ENSG00000110076
147	ENSG00000110092
148	ENSG00000110321
149	ENSG00000110651
150	ENSG00000110700
151	ENSG00000110955
152	ENSG00000111206
153	ENSG00000111371
154	ENSG00000111640
155	ENSG00000111642
156	ENSG00000111674
157	ENSG00000111676
158	ENSG00000111716
159	ENSG00000111897
160	ENSG00000112306
161	ENSG00000112531
162	ENSG00000112972
163	ENSG00000113013
164	ENSG00000113140
165	ENSG00000113161
166	ENSG00000113407
167	ENSG00000113648
168	ENSG00000113657
169	ENSG00000113739
170	ENSG00000113758
171	ENSG00000113810
172	ENSG00000114353
173	ENSG00000114391
174	ENSG00000114554
175	ENSG00000114867
176	ENSG00000114942
177	ENSG00000115009
178	ENSG00000115053
179	ENSG00000115266
180	ENSG00000115268
181	ENSG00000115306
182	ENSG00000115310
183	ENSG00000115457
184	ENSG00000115524
185	ENSG00000115677
186	ENSG00000116133
187	ENSG00000116251
188	ENSG00000116560
189	ENSG00000116584
190	ENSG00000116729
191	ENSG00000116852
192	ENSG00000117016
193	ENSG00000117114
194	ENSG00000117152
195	ENSG00000117450
196	ENSG00000117519
197	ENSG00000117523
198	ENSG00000117592
199	ENSG00000117632
200	ENSG00000117707
201	ENSG00000117724
202	ENSG00000117984
203	ENSG00000118058
204	ENSG00000118181
205	ENSG00000118271
206	ENSG00000118705
207	ENSG00000118785
208	ENSG00000118816
209	ENSG00000119283
210	ENSG00000119335
211	ENSG00000120708
212	ENSG00000120885
213	ENSG00000121774
214	ENSG00000122026
215	ENSG00000122406
216	ENSG00000122566
217	ENSG00000122862
218	ENSG00000123349
219	ENSG00000123384
220	ENSG00000123416
221	ENSG00000124422
222	ENSG00000124762
223	ENSG00000124766
224	ENSG00000124942
225	ENSG00000125107
226	ENSG00000125538
227	ENSG00000125691
228	ENSG00000126214
229	ENSG00000126709
230	ENSG00000127022
231	ENSG00000127616
232	ENSG00000128272
233	ENSG00000128564
234	ENSG00000128739
235	ENSG00000128872
236	ENSG00000129351
237	ENSG00000129951
238	ENSG00000130255
239	ENSG00000130287
240	ENSG00000130294
241	ENSG00000130402
242	ENSG00000130513
243	ENSG00000130522
244	ENSG00000130707
245	ENSG00000130723
246	ENSG00000130726
247	ENSG00000130985
248	ENSG00000131051
249	ENSG00000131236
250	ENSG00000131238
251	ENSG00000131469
252	ENSG00000131473
253	ENSG00000131507
254	ENSG00000131584
255	ENSG00000131711
256	ENSG00000131747
257	ENSG00000132341
258	ENSG00000132475
259	ENSG00000132688
260	ENSG00000132718
261	ENSG00000132872
262	ENSG00000133048
263	ENSG00000133112
264	ENSG00000133318
265	ENSG00000133639
266	ENSG00000133872
267	ENSG00000134294
268	ENSG00000134308
269	ENSG00000134313
270	ENSG00000134323
271	ENSG00000134684
272	ENSG00000134824
273	ENSG00000134986
274	ENSG00000135069
275	ENSG00000135111
276	ENSG00000135387
277	ENSG00000135390
278	ENSG00000135404
279	ENSG00000135406
280	ENSG00000135486
281	ENSG00000135624
282	ENSG00000136167
283	ENSG00000136193
284	ENSG00000136295
285	ENSG00000136485
286	ENSG00000136628
287	ENSG00000136689
288	ENSG00000136854
289	ENSG00000136942
290	ENSG00000136960
291	ENSG00000137154
292	ENSG00000137267
293	ENSG00000137285
294	ENSG00000137309
295	ENSG00000137331
296	ENSG00000137726
297	ENSG00000137818
298	ENSG00000137942
299	ENSG00000138071
300	ENSG00000138080
301	ENSG00000138326
302	ENSG00000138668
303	ENSG00000138757
304	ENSG00000138758
305	ENSG00000139289
306	ENSG00000139318
307	ENSG00000139438
308	ENSG00000139514
309	ENSG00000139644
310	ENSG00000139970
311	ENSG00000140264
312	ENSG00000140945
313	ENSG00000140988
314	ENSG00000141367
315	ENSG00000141522
316	ENSG00000142192
317	ENSG00000142534
318	ENSG00000142541
319	ENSG00000142669
320	ENSG00000142676
321	ENSG00000142798
322	ENSG00000142864
323	ENSG00000142937
324	ENSG00000143013
325	ENSG00000143126
326	ENSG00000143248
327	ENSG00000143321
328	ENSG00000143324
329	ENSG00000143333
330	ENSG00000143384
331	ENSG00000143569
332	ENSG00000143612
333	ENSG00000143621
334	ENSG00000143761
335	ENSG00000143799
336	ENSG00000143924
337	ENSG00000143933
338	ENSG00000143947
339	ENSG00000144028
340	ENSG00000144381
341	ENSG00000144713
342	ENSG00000145248
343	ENSG00000145362
344	ENSG00000145425
345	ENSG00000145592
346	ENSG00000145741
347	ENSG00000145920
348	ENSG00000146674
349	ENSG00000147065
350	ENSG00000147140
351	ENSG00000147274
352	ENSG00000147403
353	ENSG00000147604
354	ENSG00000147649
355	ENSG00000147872
356	ENSG00000148053
357	ENSG00000148248
358	ENSG00000148303
359	ENSG00000148773
360	ENSG00000148798
361	ENSG00000149273
362	ENSG00000149294
363	ENSG00000149428
364	ENSG00000149485
365	ENSG00000149806
366	ENSG00000149925
367	ENSG00000150625
368	ENSG00000150991
369	ENSG00000152234
370	ENSG00000152795
371	ENSG00000152932
372	ENSG00000153187
373	ENSG00000153879
374	ENSG00000153956
375	ENSG00000154277
376	ENSG00000154518
377	ENSG00000154917
378	ENSG00000155368
379	ENSG00000155506
380	ENSG00000155980
381	ENSG00000156482
382	ENSG00000156508
383	ENSG00000156976
384	ENSG00000157064
385	ENSG00000157227
386	ENSG00000157851
387	ENSG00000158710
388	ENSG00000158869
389	ENSG00000159140
390	ENSG00000159164
391	ENSG00000159335
392	ENSG00000160014
393	ENSG00000160255
394	ENSG00000160285
395	ENSG00000160691
396	ENSG00000160710
397	ENSG00000161011
398	ENSG00000161016
399	ENSG00000161203
400	ENSG00000161970
401	ENSG00000162244
402	ENSG00000162511
403	ENSG00000162512
404	ENSG00000162706
405	ENSG00000162733
406	ENSG00000162734
407	ENSG00000163041
408	ENSG00000163171
409	ENSG00000163466
410	ENSG00000163468
411	ENSG00000163479
412	ENSG00000163539
413	ENSG00000163682
414	ENSG00000164091
415	ENSG00000164104
416	ENSG00000164107
417	ENSG00000164434
418	ENSG00000164587
419	ENSG00000164684
420	ENSG00000164754
421	ENSG00000164924
422	ENSG00000165119
423	ENSG00000165434
424	ENSG00000165462
425	ENSG00000165671
426	ENSG00000165731
427	ENSG00000165732
428	ENSG00000166165
429	ENSG00000166197
430	ENSG00000166426
431	ENSG00000166441
432	ENSG00000166598
433	ENSG00000166710
434	ENSG00000166913
435	ENSG00000166974
436	ENSG00000167178
437	ENSG00000167244
438	ENSG00000167283
439	ENSG00000167508
440	ENSG00000167526
441	ENSG00000167552
442	ENSG00000167614
443	ENSG00000167658
444	ENSG00000167978
445	ENSG00000167996
446	ENSG00000168003
447	ENSG00000168028
448	ENSG00000168036
449	ENSG00000168066
450	ENSG00000168081
451	ENSG00000168159
452	ENSG00000168280
453	ENSG00000168298
454	ENSG00000168348
455	ENSG00000168385
456	ENSG00000168461
457	ENSG00000168824
458	ENSG00000168906
459	ENSG00000169045
460	ENSG00000169100
461	ENSG00000169136
462	ENSG00000169429
463	ENSG00000169439
464	ENSG00000169710
465	ENSG00000169714
466	ENSG00000169752
467	ENSG00000169813
468	ENSG00000169992
469	ENSG00000170004
470	ENSG00000170017
471	ENSG00000170027
472	ENSG00000170091
473	ENSG00000170144
474	ENSG00000170315
475	ENSG00000170558
476	ENSG00000170759
477	ENSG00000170889
478	ENSG00000171033
479	ENSG00000171490
480	ENSG00000171533
481	ENSG00000171603
482	ENSG00000171617
483	ENSG00000171724
484	ENSG00000171858
485	ENSG00000171863
486	ENSG00000171951
487	ENSG00000172020
488	ENSG00000172201
489	ENSG00000172270
490	ENSG00000172757
491	ENSG00000172809
492	ENSG00000173267
493	ENSG00000173660
494	ENSG00000173726
495	ENSG00000173812
496	ENSG00000174231
497	ENSG00000174437
498	ENSG00000174444
499	ENSG00000174721
500	ENSG00000174748
501	ENSG00000175061
502	ENSG00000175130
503	ENSG00000175745
504	ENSG00000176165
505	ENSG00000176749
506	ENSG00000176788
507	ENSG00000176887
508	ENSG00000177600
509	ENSG00000177733
510	ENSG00000177954
511	ENSG00000178403
512	ENSG00000179010
513	ENSG00000179195
514	ENSG00000179218
515	ENSG00000179222
516	ENSG00000179348
517	ENSG00000181163
518	ENSG00000181449
519	ENSG00000181541
520	ENSG00000182095
521	ENSG00000182168
522	ENSG00000182199
523	ENSG00000182272
524	ENSG00000182670
525	ENSG00000182768
526	ENSG00000182899
527	ENSG00000182985
528	ENSG00000184009
529	ENSG00000184347
530	ENSG00000184357
531	ENSG00000184575
532	ENSG00000184613
533	ENSG00000184897
534	ENSG00000185551
535	ENSG00000185559
536	ENSG00000185624
537	ENSG00000185630
538	ENSG00000185650
539	ENSG00000185787
540	ENSG00000186468
541	ENSG00000186469
542	ENSG00000186868
543	ENSG00000187109
544	ENSG00000187514
545	ENSG00000187678
546	ENSG00000187837
547	ENSG00000187840
548	ENSG00000187957
549	ENSG00000188157
550	ENSG00000188229
551	ENSG00000188322
552	ENSG00000188846
553	ENSG00000189060
554	ENSG00000189159
555	ENSG00000189403
556	ENSG00000196154
557	ENSG00000196205
558	ENSG00000196230
559	ENSG00000196262
560	ENSG00000196305
561	ENSG00000196365
562	ENSG00000196405
563	ENSG00000196498
564	ENSG00000196531
565	ENSG00000196628
566	ENSG00000196787
567	ENSG00000196924
568	ENSG00000197102
569	ENSG00000197457
570	ENSG00000197535
571	ENSG00000197694
572	ENSG00000197746
573	ENSG00000197756
574	ENSG00000197956
575	ENSG00000197958
576	ENSG00000198034
577	ENSG00000198408
578	ENSG00000198589
579	ENSG00000198668
580	ENSG00000198695
581	ENSG00000198700
582	ENSG00000198712
583	ENSG00000198727
584	ENSG00000198755
585	ENSG00000198763
586	ENSG00000198786
587	ENSG00000198804
588	ENSG00000198830
589	ENSG00000198840
590	ENSG00000198886
591	ENSG00000198888
592	ENSG00000198899
593	ENSG00000198910
594	ENSG00000198911
595	ENSG00000198918
596	ENSG00000198938
597	ENSG00000198961
598	ENSG00000200087
599	ENSG00000201822
600	ENSG00000202198
601	ENSG00000203879
602	ENSG00000204256
603	ENSG00000204463
604	ENSG00000204469
605	ENSG00000204580
606	ENSG00000204628
607	ENSG00000204843
608	ENSG00000205336
609	ENSG00000205542
610	ENSG00000205922
611	ENSG00000206503
612	ENSG00000210049
613	ENSG00000210082
614	ENSG00000211459
615	ENSG00000212232
616	ENSG00000212907
617	ENSG00000213190
618	ENSG00000213420
619	ENSG00000213741
620	ENSG00000213923
621	ENSG00000214548
622	ENSG00000220205
623	ENSG00000221983
624	ENSG00000225630
625	ENSG00000225783
626	ENSG00000226041
627	ENSG00000227051
628	ENSG00000228253
629	ENSG00000229117
630	ENSG00000230989
631	ENSG00000231500
632	ENSG00000231764
633	ENSG00000232444
634	ENSG00000233718
635	ENSG00000234741
636	ENSG00000234745
637	ENSG00000237125
638	ENSG00000241697
639	ENSG00000242125
640	ENSG00000242265
641	ENSG00000242307
642	ENSG00000248527
643	ENSG00000251562
644	ENSG00000253729
645	ENSG00000254772
646	ENSG00000255717
647	ENSG00000258947
648	ENSG00000259001
649	ENSG00000260032
650	ENSG00000263934
651	ENSG00000264364
652	ENSG00000264462
653	ENSG00000269900
654	ENSG00000272325
655	ENSG00000272398
656	ENSG00000274012
657	ENSG00000276293
658	ENSG00000277443
659	ENSG00000277586
660	ENSG00000280987

## Sheet: gene symbol
From	To	Species	Gene Name
ENSG00000113657	DPYSL3	Homo sapiens	dihydropyrimidinase like 3(DPYSL3)
ENSG00000114867	EIF4G1	Homo sapiens	eukaryotic translation initiation factor 4 gamma 1(EIF4G1)
ENSG00000162706	CADM3	Homo sapiens	cell adhesion molecule 3(CADM3)
ENSG00000167283	ATP5L	Homo sapiens	ATP synthase, H+ transporting, mitochondrial Fo complex subunit G(ATP5L)
ENSG00000009307	CSDE1	Homo sapiens	cold shock domain containing E1(CSDE1)
ENSG00000080644	CHRNA3	Homo sapiens	cholinergic receptor nicotinic alpha 3 subunit(CHRNA3)
ENSG00000034510	TMSB10	Homo sapiens	thymosin beta 10(TMSB10)
ENSG00000166197	NOLC1	Homo sapiens	nucleolar and coiled-body phosphoprotein 1(NOLC1)
ENSG00000123349	PFDN5	Homo sapiens	prefoldin subunit 5(PFDN5)
ENSG00000169100	SLC25A6	Homo sapiens	solute carrier family 25 member 6(SLC25A6)
ENSG00000100345	MYH9	Homo sapiens	myosin heavy chain 9(MYH9)
ENSG00000089220	PEBP1	Homo sapiens	phosphatidylethanolamine binding protein 1(PEBP1)
ENSG00000070831	CDC42	Homo sapiens	cell division cycle 42(CDC42)
ENSG00000067560	RHOA	Homo sapiens	ras homolog family member A(RHOA)
ENSG00000237125	HAND2-AS1	Homo sapiens	HAND2 antisense RNA 1 (head to head)(HAND2-AS1)
ENSG00000113648	h2afy	Homo sapiens	H2A histone family member Y(H2AFY)
ENSG00000113407	TARS	Homo sapiens	threonyl-tRNA synthetase(TARS)
ENSG00000189060	H1F0	Homo sapiens	H1 histone family member 0(H1F0)
ENSG00000157227	MMP14	Homo sapiens	matrix metallopeptidase 14(MMP14)
ENSG00000168028	RPSA	Homo sapiens	ribosomal protein SA(RPSA)
ENSG00000172757	CFL1	Homo sapiens	cofilin 1(CFL1)
ENSG00000173726	TOMM20	Homo sapiens	translocase of outer mitochondrial membrane 20(TOMM20)
ENSG00000125538	IL1B	Homo sapiens	interleukin 1 beta(IL1B)
ENSG00000167178	ISLR2	Homo sapiens	immunoglobulin superfamily containing leucine rich repeat 2(ISLR2)
ENSG00000088247	MIR3940	Homo sapiens	microRNA 3940(MIR3940)
ENSG00000168385	SEPT2	Homo sapiens	septin 2(SEPT2)
ENSG00000182670	TTC3	Homo sapiens	tetratricopeptide repeat domain 3(TTC3)
ENSG00000145362	ANK2	Homo sapiens	ankyrin 2(ANK2)
ENSG00000108298	RPL19	Homo sapiens	ribosomal protein L19(RPL19)
ENSG00000108175	ZMIZ1	Homo sapiens	zinc finger MIZ-type containing 1(ZMIZ1)
ENSG00000094916	MIR3198-2	Homo sapiens	microRNA 3198-2(MIR3198-2)
ENSG00000122026	RPL21	Homo sapiens	ribosomal protein L21(RPL21)
ENSG00000086061	DNAJA1	Homo sapiens	DnaJ heat shock protein family (Hsp40) member A1(DNAJA1)
ENSG00000145248	SLC10A4	Homo sapiens	solute carrier family 10 member 4(SLC10A4)
ENSG00000184613	NELL2	Homo sapiens	neural EGFL like 2(NELL2)
ENSG00000260032	NORAD	Homo sapiens	non-coding RNA activated by DNA damage(NORAD)
ENSG00000105810	CDK6	Homo sapiens	cyclin dependent kinase 6(CDK6)
ENSG00000137726	FXYD6	Homo sapiens	FXYD domain containing ion transport regulator 6(FXYD6)
ENSG00000104722	NEFM	Homo sapiens	neurofilament, medium polypeptide(NEFM)
ENSG00000145592	RPL37	Homo sapiens	ribosomal protein L37(RPL37)
ENSG00000044574	HSPA5	Homo sapiens	heat shock protein family A (Hsp70) member 5(HSPA5)
ENSG00000144381	HSPD1	Homo sapiens	heat shock protein family D (Hsp60) member 1(HSPD1)
ENSG00000047849	MAP4	Homo sapiens	microtubule associated protein 4(MAP4)
ENSG00000197956	S100A6	Homo sapiens	S100 calcium binding protein A6(S100A6)
ENSG00000198804	COX1	Homo sapiens	cytochrome c oxidase subunit I(COX1)
ENSG00000144028	SNRNP200	Homo sapiens	small nuclear ribonucleoprotein U5 subunit 200(SNRNP200)
ENSG00000198918	RPL39	Homo sapiens	ribosomal protein L39(RPL39)
ENSG00000111371	SLC38A1	Homo sapiens	solute carrier family 38 member 1(SLC38A1)
ENSG00000168159	RNF187	Homo sapiens	ring finger protein 187(RNF187)
ENSG00000230989	HSBP1	Homo sapiens	heat shock factor binding protein 1(HSBP1)
ENSG00000100129	EIF3L	Homo sapiens	eukaryotic translation initiation factor 3 subunit L(EIF3L)
ENSG00000168036	CTNNB1	Homo sapiens	catenin beta 1(CTNNB1)
ENSG00000156482	RPL30	Homo sapiens	ribosomal protein L30(RPL30)
ENSG00000092964	DPYSL2	Homo sapiens	dihydropyrimidinase like 2(DPYSL2)
ENSG00000063177	RPL18	Homo sapiens	ribosomal protein L18(RPL18)
ENSG00000162733	DDR2	Homo sapiens	discoidin domain receptor tyrosine kinase 2(DDR2)
ENSG00000162734	PEA15	Homo sapiens	phosphoprotein enriched in astrocytes 15(PEA15)
ENSG00000251562	MALAT1	Homo sapiens	metastasis associated lung adenocarcinoma transcript 1 (non-protein coding)(MALAT1)
ENSG00000101210	EEF1A2	Homo sapiens	eukaryotic translation elongation factor 1 alpha 2(EEF1A2)
ENSG00000092841	MYL6	Homo sapiens	myosin light chain 6(MYL6)
ENSG00000174721	FGFBP3	Homo sapiens	fibroblast growth factor binding protein 3(FGFBP3)
ENSG00000142192	APP	Homo sapiens	amyloid beta precursor protein(APP)
ENSG00000253729	PRKDC	Homo sapiens	protein kinase, DNA-activated, catalytic polypeptide(PRKDC)
ENSG00000198910	L1CAM	Homo sapiens	L1 cell adhesion molecule(L1CAM)
ENSG00000170004	CHD3	Homo sapiens	chromodomain helicase DNA binding protein 3(CHD3)
ENSG00000168280	KIF5C	Homo sapiens	kinesin family member 5C(KIF5C)
ENSG00000006125	AP2B1	Homo sapiens	adaptor related protein complex 2 beta 1 subunit(AP2B1)
ENSG00000198911	SREBF2	Homo sapiens	sterol regulatory element binding transcription factor 2(SREBF2)
ENSG00000147649	MTDH	Homo sapiens	metadherin(MTDH)
ENSG00000011304	MIR4745	Homo sapiens	microRNA 4745(MIR4745)
ENSG00000169136	MIR4751	Homo sapiens	microRNA 4751(MIR4751)
ENSG00000124422	USP22	Homo sapiens	ubiquitin specific peptidase 22(USP22)
ENSG00000101444	AHCY	Homo sapiens	adenosylhomocysteinase(AHCY)
ENSG00000164924	YWHAZ	Homo sapiens	tyrosine 3-monooxygenase/tryptophan 5-monooxygenase activation protein zeta(YWHAZ)
ENSG00000146674	IGFBP3	Homo sapiens	insulin like growth factor binding protein 3(IGFBP3)
ENSG00000147403	RPL10	Homo sapiens	ribosomal protein L10(RPL10)
ENSG00000100353	EIF3D	Homo sapiens	eukaryotic translation initiation factor 3 subunit D(EIF3D)
ENSG00000011422	PLAUR	Homo sapiens	plasminogen activator, urokinase receptor(PLAUR)
ENSG00000135406	PRPH	Homo sapiens	peripherin(PRPH)
ENSG00000046653	GPM6B	Homo sapiens	glycoprotein M6B(GPM6B)
ENSG00000113739	STC2	Homo sapiens	stanniocalcin 2(STC2)
ENSG00000135404	CD63	Homo sapiens	CD63 molecule(CD63)
ENSG00000018189	RUFY3	Homo sapiens	RUN and FYVE domain containing 3(RUFY3)
ENSG00000119283	TRIM67	Homo sapiens	tripartite motif containing 67(TRIM67)
ENSG00000077279	DCX	Homo sapiens	doublecortin(DCX)
ENSG00000114942	EEF1B2	Homo sapiens	eukaryotic translation elongation factor 1 beta 2(EEF1B2)
ENSG00000111674	ENO2	Homo sapiens	enolase 2(ENO2)
ENSG00000137942	FNBP1L	Homo sapiens	formin binding protein 1 like(FNBP1L)
ENSG00000111676	ATN1	Homo sapiens	atrophin 1(ATN1)
ENSG00000198700	IPO9	Homo sapiens	importin 9(IPO9)
ENSG00000104904	OAZ1	Homo sapiens	ornithine decarboxylase antizyme 1(OAZ1)
ENSG00000134313	KIDINS220	Homo sapiens	kinase D-interacting substrate 220kDa(KIDINS220)
ENSG00000136854	STXBP1	Homo sapiens	syntaxin binding protein 1(STXBP1)
ENSG00000170017	ALCAM	Homo sapiens	activated leukocyte cell adhesion molecule(ALCAM)
ENSG00000196405	EVL	Homo sapiens	Enah/Vasp-like(EVL)
ENSG00000198938	COX3	Homo sapiens	cytochrome c oxidase III(COX3)
ENSG00000160691	SHC1	Homo sapiens	SHC adaptor protein 1(SHC1)
ENSG00000168298	HIST1H1E	Homo sapiens	histone cluster 1 H1 family member e(HIST1H1E)
ENSG00000147872	PLIN2	Homo sapiens	perilipin 2(PLIN2)
ENSG00000162512	SDC3	Homo sapiens	syndecan 3(SDC3)
ENSG00000109475	RPL34	Homo sapiens	ribosomal protein L34(RPL34)
ENSG00000185630	PBX1	Homo sapiens	PBX homeobox 1(PBX1)
ENSG00000109472	CPE	Homo sapiens	carboxypeptidase E(CPE)
ENSG00000272325	NUDT3	Homo sapiens	nudix hydrolase 3(NUDT3)
ENSG00000070756	MIR7705	Homo sapiens	microRNA 7705(MIR7705)
ENSG00000087086	FTL	Homo sapiens	ferritin light chain(FTL)
ENSG00000162511	LAPTM5	Homo sapiens	lysosomal protein transmembrane 5(LAPTM5)
ENSG00000136628	EPRS	Homo sapiens	glutamyl-prolyl-tRNA synthetase(EPRS)
ENSG00000155368	DBI	Homo sapiens	diazepam binding inhibitor, acyl-CoA binding protein(DBI)
ENSG00000153187	HNRNPU	Homo sapiens	heterogeneous nuclear ribonucleoprotein U(HNRNPU)
ENSG00000072832	CRMP1	Homo sapiens	collapsin response mediator protein 1(CRMP1)
ENSG00000154277	UCHL1	Homo sapiens	ubiquitin C-terminal hydrolase L1(UCHL1)
ENSG00000078018	MAP2	Homo sapiens	microtubule associated protein 2(MAP2)
ENSG00000172201	ID4	Homo sapiens	inhibitor of DNA binding 4, HLH protein(ID4)
ENSG00000131051	RBM39	Homo sapiens	RNA binding motif protein 39(RBM39)
ENSG00000134684	YARS	Homo sapiens	tyrosyl-tRNA synthetase(YARS)
ENSG00000170144	MIR4444-1	Homo sapiens	microRNA 4444-1(MIR4444-1)
ENSG00000204463	BAG6	Homo sapiens	BCL2 associated athanogene 6(BAG6)
ENSG00000133112	TPT1	Homo sapiens	tumor protein, translationally-controlled 1(TPT1)
ENSG00000170027	YWHAG	Homo sapiens	tyrosine 3-monooxygenase/tryptophan 5-monooxygenase activation protein gamma(YWHAG)
ENSG00000204580	MIR4640	Homo sapiens	microRNA 4640(MIR4640)
ENSG00000134323	MYCN	Homo sapiens	v-myc avian myelocytomatosis viral oncogene neuroblastoma derived homolog(MYCN)
ENSG00000149806	FAU	Homo sapiens	FAU, ubiquitin like and ribosomal protein S30 fusion(FAU)
ENSG00000197958	RPL12	Homo sapiens	ribosomal protein L12(RPL12)
ENSG00000204469	PRRC2A	Homo sapiens	proline rich coiled-coil 2A(PRRC2A)
ENSG00000196628	TCF4	Homo sapiens	transcription factor 4(TCF4)
ENSG00000149925	ALDOA	Homo sapiens	aldolase, fructose-bisphosphate A(ALDOA)
ENSG00000126709	IFI6	Homo sapiens	interferon alpha inducible protein 6(IFI6)
ENSG00000168066	SF1	Homo sapiens	splicing factor 1(SF1)
ENSG00000078369	GNB1	Homo sapiens	G protein subunit beta 1(GNB1)
ENSG00000179195	ZNF664	Homo sapiens	zinc finger protein 664(ZNF664)
ENSG00000079459	FDFT1	Homo sapiens	farnesyl-diphosphate farnesyltransferase 1(FDFT1)
ENSG00000143384	MCL1	Homo sapiens	BCL2 family apoptosis regulator(MCL1)
ENSG00000124766	SOX4	Homo sapiens	SRY-box 4(SOX4)
ENSG00000087074	PPP1R15A	Homo sapiens	protein phosphatase 1 regulatory subunit 15A(PPP1R15A)
ENSG00000185624	P4HB	Homo sapiens	prolyl 4-hydroxylase subunit beta(P4HB)
ENSG00000184897	H1FX	Homo sapiens	H1 histone family member X(H1FX)
ENSG00000124762	CDKN1A	Homo sapiens	cyclin dependent kinase inhibitor 1A(CDKN1A)
ENSG00000158869	FCER1G	Homo sapiens	Fc fragment of IgE receptor Ig(FCER1G)
ENSG00000135624	CCT7	Homo sapiens	chaperonin containing TCP1 subunit 7(CCT7)
ENSG00000173660	Uqcrh	Homo sapiens	ubiquinol-cytochrome c reductase hinge protein(UQCRH)
ENSG00000113758	DBN1	Homo sapiens	drebrin 1(DBN1)
ENSG00000198840	ND3	Homo sapiens	NADH dehydrogenase, subunit 3 (complex I)(ND3)
ENSG00000198961	PJA2	Homo sapiens	praja ring finger ubiquitin ligase 2(PJA2)
ENSG00000112306	RPS12	Homo sapiens	ribosomal protein S12(RPS12)
ENSG00000181163	NPM1	Homo sapiens	nucleophosmin(NPM1)
ENSG00000130294	KIF1A	Homo sapiens	kinesin family member 1A(KIF1A)
ENSG00000205542	TMSB4X	Homo sapiens	thymosin beta 4, X-linked(TMSB4X)
ENSG00000196787	Hist1h2ag	Homo sapiens	histone cluster 1 H2A family member g(HIST1H2AG)
ENSG00000197756	RPL37A	Homo sapiens	ribosomal protein L37a(RPL37A)
ENSG00000132475	MIR4738	Homo sapiens	microRNA 4738(MIR4738)
ENSG00000196305	IARS	Homo sapiens	isoleucyl-tRNA synthetase(IARS)
ENSG00000118058	KMT2A	Homo sapiens	lysine methyltransferase 2A(KMT2A)
ENSG00000198727	CYTB	Homo sapiens	cytochrome b(CYTB)
ENSG00000174748	RPL15	Homo sapiens	ribosomal protein L15(RPL15)
ENSG00000089009	RPL6	Homo sapiens	ribosomal protein L6(RPL6)
ENSG00000169045	HNRNPH1	Homo sapiens	heterogeneous nuclear ribonucleoprotein H1 (H)(HNRNPH1)
ENSG00000185650	ZFP36L1	Homo sapiens	ZFP36 ring finger protein like 1(ZFP36L1)
ENSG00000100201	DDX17	Homo sapiens	DEAD-box helicase 17(DDX17)
ENSG00000186868	MAPT	Homo sapiens	microtubule associated protein tau(MAPT)
ENSG00000187957	DNER	Homo sapiens	delta/notch like EGF repeat containing(DNER)
ENSG00000143013	LMO4	Homo sapiens	LIM domain only 4(LMO4)
ENSG00000187837	HIST1H1C	Homo sapiens	histone cluster 1 H1 family member c(HIST1H1C)
ENSG00000100320	RBFOX2	Homo sapiens	RNA binding protein, fox-1 homolog 2(RBFOX2)
ENSG00000161203	AP2M1	Homo sapiens	adaptor related protein complex 2 mu 1 subunit(AP2M1)
ENSG00000137818	RPLP1	Homo sapiens	ribosomal protein lateral stalk subunit P1(RPLP1)
ENSG00000171490	RSL1D1	Homo sapiens	ribosomal L1 domain containing 1(RSL1D1)
ENSG00000118181	RPS25	Homo sapiens	ribosomal protein S25(RPS25)
ENSG00000067225	PKM	Homo sapiens	pyruvate kinase, muscle(PKM)
ENSG00000134308	YWHAQ	Homo sapiens	tyrosine 3-monooxygenase/tryptophan 5-monooxygenase activation protein theta(YWHAQ)
ENSG00000111206	FOXM1	Homo sapiens	forkhead box M1(FOXM1)
ENSG00000196531	NACA	Homo sapiens	nascent polypeptide-associated complex alpha subunit(NACA)
ENSG00000136960	ENPP2	Homo sapiens	ectonucleotide pyrophosphatase/phosphodiesterase 2(ENPP2)
ENSG00000198830	HMGN2	Homo sapiens	high mobility group nucleosomal binding domain 2(HMGN2)
ENSG00000008988	RPS20	Homo sapiens	ribosomal protein S20(RPS20)
ENSG00000112531	QKI	Homo sapiens	QKI, KH domain containing RNA binding(QKI)
ENSG00000198712	COX2	Homo sapiens	cytochrome c oxidase subunit II(COX2)
ENSG00000197746	PSAP	Homo sapiens	prosaposin(PSAP)
ENSG00000168081	PNOC	Homo sapiens	prepronociceptin(PNOC)
ENSG00000009954	BAZ1B	Homo sapiens	bromodomain adjacent to zinc finger domain 1B(BAZ1B)
ENSG00000143126	CELSR2	Homo sapiens	cadherin EGF LAG seven-pass G-type receptor 2(CELSR2)
ENSG00000145425	RPS3A	Homo sapiens	ribosomal protein S3A(RPS3A)
ENSG00000143248	RGS5	Homo sapiens	regulator of G-protein signaling 5(RGS5)
ENSG00000147604	RPL7	Homo sapiens	ribosomal protein L7(RPL7)
ENSG00000100316	RPL3	Homo sapiens	ribosomal protein L3(RPL3)
ENSG00000206503	hla-a	Homo sapiens	major histocompatibility complex, class I, A(HLA-A)
ENSG00000123416	TUBA1B	Homo sapiens	tubulin alpha 1b(TUBA1B)
ENSG00000089597	GANAB	Homo sapiens	glucosidase II alpha subunit(GANAB)
ENSG00000122566	HNRNPA2B1	Homo sapiens	heterogeneous nuclear ribonucleoprotein A2/B1(HNRNPA2B1)
ENSG00000108107	MIR6805	Homo sapiens	microRNA 6805(MIR6805)
ENSG00000074800	ENO1	Homo sapiens	enolase 1(ENO1)
ENSG00000213420	GPC2	Homo sapiens	glypican 2(GPC2)
ENSG00000118271	TTR	Homo sapiens	transthyretin(TTR)
ENSG00000113810	SMC4	Homo sapiens	structural maintenance of chromosomes 4(SMC4)
ENSG00000197535	MYO5A	Homo sapiens	myosin VA(MYO5A)
ENSG00000175745	NR2F1	Homo sapiens	nuclear receptor subfamily 2 group F member 1(NR2F1)
ENSG00000084731	KIF3C	Homo sapiens	kinesin family member 3C(KIF3C)
ENSG00000205922	ONECUT3	Homo sapiens	one cut homeobox 3(ONECUT3)
ENSG00000102804	TSC22D1	Homo sapiens	TSC22 domain family member 1(TSC22D1)
ENSG00000100985	MMP9	Homo sapiens	matrix metallopeptidase 9(MMP9)
ENSG00000185551	MIR1469	Homo sapiens	microRNA 1469(MIR1469)
ENSG00000105193	RPS16	Homo sapiens	ribosomal protein S16(RPS16)
ENSG00000166913	YWHAB	Homo sapiens	tyrosine 3-monooxygenase/tryptophan 5-monooxygenase activation protein beta(YWHAB)
ENSG00000160014	CALM3	Homo sapiens	calmodulin 3(CALM3)
ENSG00000160255	ITGB2	Homo sapiens	integrin subunit beta 2(ITGB2)
ENSG00000182168	UNC5C	Homo sapiens	unc-5 netrin receptor C(UNC5C)
ENSG00000184347	SLIT3	Homo sapiens	slit guidance ligand 3(SLIT3)
ENSG00000185559	DLK1	Homo sapiens	delta like non-canonical Notch ligand 1(DLK1)
ENSG00000047410	TPR	Homo sapiens	translocated promoter region, nuclear basket protein(TPR)
ENSG00000133318	RTN3	Homo sapiens	reticulon 3(RTN3)
ENSG00000048740	CELF2	Homo sapiens	CUGBP, Elav-like family member 2(CELF2)
ENSG00000171033	PKIA	Homo sapiens	protein kinase (cAMP-dependent, catalytic) inhibitor alpha(PKIA)
ENSG00000110651	CD81	Homo sapiens	CD81 molecule(CD81)
ENSG00000132341	RAN	Homo sapiens	RAN, member RAS oncogene family(RAN)
ENSG00000158710	TAGLN2	Homo sapiens	transgelin 2(TAGLN2)
ENSG00000136942	RPL35	Homo sapiens	ribosomal protein L35(RPL35)
ENSG00000130287	NCAN	Homo sapiens	neurocan(NCAN)
ENSG00000225783	Miat	Homo sapiens	myocardial infarction associated transcript (non-protein coding)(MIAT)
ENSG00000182272	b4galnt4	Homo sapiens	beta-1,4-N-acetyl-galactosaminyltransferase 4(B4GALNT4)
ENSG00000187840	EIF4EBP1	Homo sapiens	eukaryotic translation initiation factor 4E binding protein 1(EIF4EBP1)
ENSG00000184575	XPOT	Homo sapiens	exportin for tRNA(XPOT)
ENSG00000185787	MORF4L1	Homo sapiens	mortality factor 4 like 1(MORF4L1)
ENSG00000106153	CHCHD2	Homo sapiens	coiled-coil-helix-coiled-coil-helix domain containing 2(CHCHD2)
ENSG00000107485	GATA3	Homo sapiens	GATA binding protein 3(GATA3)
ENSG00000106278	PTPRZ1	Homo sapiens	protein tyrosine phosphatase, receptor type Z1(PTPRZ1)
ENSG00000131469	RPL27	Homo sapiens	ribosomal protein L27(RPL27)
ENSG00000089280	FUS	Homo sapiens	FUS RNA binding protein(FUS)
ENSG00000163539	CLASP2	Homo sapiens	cytoplasmic linker associated protein 2(CLASP2)
ENSG00000111897	SERINC1	Homo sapiens	serine incorporator 1(SERINC1)
ENSG00000198763	ND2	Homo sapiens	MTND2(ND2)
ENSG00000198886	ND4	Homo sapiens	NADH dehydrogenase, subunit 4 (complex I)(ND4)
ENSG00000110321	EIF4G2	Homo sapiens	eukaryotic translation initiation factor 4 gamma 2(EIF4G2)
ENSG00000198888	ND1	Homo sapiens	NADH dehydrogenase, subunit 1 (complex I)(ND1)
ENSG00000131584	acap3	Homo sapiens	ArfGAP with coiled-coil, ankyrin repeat and PH domains 3(ACAP3)
ENSG00000008710	MIR6511B1	Homo sapiens	microRNA 6511b-1(MIR6511B1)
ENSG00000157851	DPYSL5	Homo sapiens	dihydropyrimidinase like 5(DPYSL5)
ENSG00000198408	MGEA5	Homo sapiens	meningioma expressed antigen 5 (hyaluronidase)(MGEA5)
ENSG00000174437	ATP2A2	Homo sapiens	ATPase sarcoplasmic/endoplasmic reticulum Ca2+ transporting 2(ATP2A2)
ENSG00000130255	RPL36	Homo sapiens	ribosomal protein L36(RPL36)
ENSG00000060982	BCAT1	Homo sapiens	branched chain amino acid transaminase 1(BCAT1)
ENSG00000079246	XRCC5	Homo sapiens	X-ray repair cross complementing 5(XRCC5)
ENSG00000101856	PGRMC1	Homo sapiens	progesterone receptor membrane component 1(PGRMC1)
ENSG00000187514	MIR1244-1	Homo sapiens	microRNA 1244-1(MIR1244-1)
ENSG00000108001	EBF3	Homo sapiens	early B-cell factor 3(EBF3)
ENSG00000184009	ACTG1	Homo sapiens	actin gamma 1(ACTG1)
ENSG00000164754	MIR3610	Homo sapiens	microRNA 3610(MIR3610)
ENSG00000143333	RGS16	Homo sapiens	regulator of G-protein signaling 16(RGS16)
ENSG00000188846	RPL14	Homo sapiens	ribosomal protein L14(RPL14)
ENSG00000131236	CAP1	Homo sapiens	adenylate cyclase associated protein 1(CAP1)
ENSG00000132688	NES	Homo sapiens	nestin(NES)
ENSG00000134986	NREP	Homo sapiens	neuronal regeneration related protein(NREP)
ENSG00000131238	PPT1	Homo sapiens	palmitoyl-protein thioesterase 1(PPT1)
ENSG00000172020	GAP43	Homo sapiens	growth associated protein 43(GAP43)
ENSG00000263934	SNORD3A	Homo sapiens	small nucleolar RNA, C/D box 3A(SNORD3A)
ENSG00000112972	HMGCS1	Homo sapiens	3-hydroxy-3-methylglutaryl-CoA synthase 1(HMGCS1)
ENSG00000111640	GAPDH	Homo sapiens	glyceraldehyde-3-phosphate dehydrogenase(GAPDH)
ENSG00000083845	RPS5	Homo sapiens	ribosomal protein S5(RPS5)
ENSG00000174444	RPL4	Homo sapiens	ribosomal protein L4(RPL4)
ENSG00000111642	CHD4	Homo sapiens	chromodomain helicase DNA binding protein 4(CHD4)
ENSG00000198755	RPL10A	Homo sapiens	ribosomal protein L10a(RPL10A)
ENSG00000176749	CDK5R1	Homo sapiens	cyclin dependent kinase 5 regulatory subunit 1(CDK5R1)
ENSG00000131473	ACLY	Homo sapiens	ATP citrate lyase(ACLY)
ENSG00000177954	RPS27	Homo sapiens	ribosomal protein S27(RPS27)
ENSG00000143324	XPR1	Homo sapiens	xenotropic and polytropic retrovirus receptor 1(XPR1)
ENSG00000099194	SCD	Homo sapiens	stearoyl-CoA desaturase(SCD)
ENSG00000143569	UBAP2L	Homo sapiens	ubiquitin associated protein 2 like(UBAP2L)
ENSG00000161011	SQSTM1	Homo sapiens	sequestosome 1(SQSTM1)
ENSG00000160285	LSS	Homo sapiens	lanosterol synthase (2,3-oxidosqualene-lanosterol cyclase)(LSS)
ENSG00000082641	NFE2L1	Homo sapiens	nuclear factor, erythroid 2 like 1(NFE2L1)
ENSG00000122406	RPL5	Homo sapiens	ribosomal protein L5(RPL5)
ENSG00000184357	HIST1H1B	Homo sapiens	histone cluster 1 H1 family member b(HIST1H1B)
ENSG00000089157	RPLP0	Homo sapiens	ribosomal protein lateral stalk subunit P0(RPLP0)
ENSG00000124942	AHNAK	Homo sapiens	AHNAK nucleoprotein(AHNAK)
ENSG00000145741	BTF3	Homo sapiens	basic transcription factor 3(BTF3)
ENSG00000165732	DDX21	Homo sapiens	DExD-box helicase 21(DDX21)
ENSG00000165731	RET	Homo sapiens	ret proto-oncogene(RET)
ENSG00000143321	HDGF	Homo sapiens	hepatoma-derived growth factor(HDGF)
ENSG00000109685	whsc1	Homo sapiens	Wolf-Hirschhorn syndrome candidate 1(WHSC1)
ENSG00000161016	MIR6850	Homo sapiens	microRNA 6850(MIR6850)
ENSG00000170091	HMP19	Homo sapiens	HMP19 protein(HMP19)
ENSG00000172270	BSG	Homo sapiens	basigin (Ok blood group)(BSG)
ENSG00000108424	KPNB1	Homo sapiens	karyopherin subunit beta 1(KPNB1)
ENSG00000111716	LDHB	Homo sapiens	lactate dehydrogenase B(LDHB)
ENSG00000197694	SPTAN1	Homo sapiens	spectrin alpha, non-erythrocytic 1(SPTAN1)
ENSG00000095787	WAC	Homo sapiens	WW domain containing adaptor with coiled-coil(WAC)
ENSG00000196365	LONP1	Homo sapiens	lon peptidase 1, mitochondrial(LONP1)
ENSG00000128272	ATF4	Homo sapiens	activating transcription factor 4(ATF4)
ENSG00000198786	ND5	Homo sapiens	NADH dehydrogenase, subunit 5 (complex I)(ND5)
ENSG00000156508	EEF1A1	Homo sapiens	eukaryotic translation elongation factor 1 alpha 1(EEF1A1)
ENSG00000197457	STMN3	Homo sapiens	stathmin 3(STMN3)
ENSG00000198668	CALM1	Homo sapiens	calmodulin 1(CALM1)
ENSG00000177600	RPLP2	Homo sapiens	ribosomal protein lateral stalk subunit P2(RPLP2)
ENSG00000117016	RIMS3	Homo sapiens	regulating synaptic membrane exocytosis 3(RIMS3)
ENSG00000163682	RPL9	Homo sapiens	ribosomal protein L9(RPL9)
ENSG00000143799	PARP1	Homo sapiens	poly(ADP-ribose) polymerase 1(PARP1)
ENSG00000139289	PHLDA1	Homo sapiens	pleckstrin homology like domain family A member 1(PHLDA1)
ENSG00000100823	APEX1	Homo sapiens	apurinic/apyrimidinic endodeoxyribonuclease 1(APEX1)
ENSG00000138071	ACTR2	Homo sapiens	ARP2 actin related protein 2 homolog(ACTR2)
ENSG00000166710	B2M	Homo sapiens	beta-2-microglobulin(B2M)
ENSG00000214548	meg3	Homo sapiens	maternally expressed 3 (non-protein coding)(MEG3)
ENSG00000196230	TUBB	Homo sapiens	tubulin beta class I(TUBB)
ENSG00000133639	BTG1	Homo sapiens	BTG anti-proliferation factor 1(BTG1)
ENSG00000198899	ATP6	Homo sapiens	ATP synthase F0 subunit 6(ATP6)
ENSG00000177733	HNRNPA0	Homo sapiens	heterogeneous nuclear ribonucleoprotein A0(HNRNPA0)
ENSG00000156976	MIR1248	Homo sapiens	microRNA 1248(MIR1248)
ENSG00000176887	SOX11	Homo sapiens	SRY-box 11(SOX11)
ENSG00000119335	SET	Homo sapiens	SET nuclear proto-oncogene(SET)
ENSG00000133872	SARAF	Homo sapiens	store-operated calcium entry associated regulatory factor(SARAF)
ENSG00000168906	MAT2A	Homo sapiens	methionine adenosyltransferase 2A(MAT2A)
ENSG00000182199	SHMT2	Homo sapiens	serine hydroxymethyltransferase 2(SHMT2)
ENSG00000138080	EMILIN1	Homo sapiens	elastin microfibril interfacer 1(EMILIN1)
ENSG00000162244	RPL29	Homo sapiens	ribosomal protein L29(RPL29)
ENSG00000204628	RACK1	Homo sapiens	receptor for activated C kinase 1(RACK1)
ENSG00000121774	KHDRBS1	Homo sapiens	KH RNA binding domain containing, signal transduction associated 1(KHDRBS1)
ENSG00000108654	Mir3064	Homo sapiens	microRNA 3064(MIR3064)
ENSG00000122862	SRGN	Homo sapiens	serglycin(SRGN)
ENSG00000141367	CLTC	Homo sapiens	clathrin heavy chain(CLTC)
ENSG00000196262	PPIA	Homo sapiens	peptidylprolyl isomerase A(PPIA)
ENSG00000212232	Snord17	Homo sapiens	small nucleolar RNA, C/D box 17(SNORD17)
ENSG00000174231	PRPF8	Homo sapiens	pre-mRNA processing factor 8(PRPF8)
ENSG00000173267	SNCG	Homo sapiens	synuclein gamma(SNCG)
ENSG00000077097	MIR4442	Homo sapiens	microRNA 4442(MIR4442)
ENSG00000132872	SYT4	Homo sapiens	synaptotagmin 4(SYT4)
ENSG00000140264	SERF2	Homo sapiens	small EDRK-rich factor 2(SERF2)
ENSG00000100604	CHGA	Homo sapiens	chromogranin A(CHGA)
ENSG00000117152	RGS4	Homo sapiens	regulator of G-protein signaling 4(RGS4)
ENSG00000105290	APLP1	Homo sapiens	amyloid beta precursor like protein 1(APLP1)
ENSG00000186468	rps23	Homo sapiens	ribosomal protein S23(RPS23)
ENSG00000187678	SPRY4	Homo sapiens	sprouty RTK signaling antagonist 4(SPRY4)
ENSG00000186469	GNG2	Homo sapiens	G protein subunit gamma 2(GNG2)
ENSG00000109654	TRIM2	Homo sapiens	tripartite motif containing 2(TRIM2)
ENSG00000164434	FABP7	Homo sapiens	fatty acid binding protein 7(FABP7)
ENSG00000166974	MAPRE2	Homo sapiens	microtubule associated protein RP/EB family member 2(MAPRE2)
ENSG00000163466	ARPC2	Homo sapiens	actin related protein 2/3 complex subunit 2(ARPC2)
ENSG00000163468	CCT3	Homo sapiens	chaperonin containing TCP1 subunit 3(CCT3)
ENSG00000052802	MSMO1	Homo sapiens	methylsterol monooxygenase 1(MSMO1)
ENSG00000134824	FADS2	Homo sapiens	fatty acid desaturase 2(FADS2)
ENSG00000129351	ILF3	Homo sapiens	interleukin enhancer binding factor 3(ILF3)
ENSG00000155980	KIF5A	Homo sapiens	kinesin family member 5A(KIF5A)
ENSG00000197102	DYNC1H1	Homo sapiens	dynein cytoplasmic 1 heavy chain 1(DYNC1H1)
ENSG00000196498	NCOR2	Homo sapiens	nuclear receptor corepressor 2(NCOR2)
ENSG00000176788	BASP1	Homo sapiens	brain abundant membrane attached signal protein 1(BASP1)
ENSG00000155506	LARP1	Homo sapiens	La ribonucleoprotein domain family member 1(LARP1)
ENSG00000152234	ATP5A1	Homo sapiens	ATP synthase, H+ transporting, mitochondrial F1 complex, alpha subunit 1, cardiac muscle(ATP5A1)
ENSG00000204843	DCTN1	Homo sapiens	dynactin subunit 1(DCTN1)
ENSG00000164684	ZNF704	Homo sapiens	zinc finger protein 704(ZNF704)
ENSG00000182095	TNRC18	Homo sapiens	trinucleotide repeat containing 18(TNRC18)
ENSG00000105281	slc1a5	Homo sapiens	solute carrier family 1 member 5(SLC1A5)
ENSG00000107581	EIF3A	Homo sapiens	eukaryotic translation initiation factor 3 subunit A(EIF3A)
ENSG00000203879	GDI1	Homo sapiens	GDP dissociation inhibitor 1(GDI1)
ENSG00000069482	GAL	Homo sapiens	galanin and GMAP prepropeptide(GAL)
ENSG00000089199	CHGB	Homo sapiens	chromogranin B(CHGB)
ENSG00000143761	MIR3620	Homo sapiens	microRNA 3620(MIR3620)
ENSG00000142798	HSPG2	Homo sapiens	heparan sulfate proteoglycan 2(HSPG2)
ENSG00000142676	RPL11	Homo sapiens	ribosomal protein L11(RPL11)
ENSG00000163479	SSR2	Homo sapiens	signal sequence receptor subunit 2(SSR2)
ENSG00000127022	CANX	Homo sapiens	calnexin(CANX)
ENSG00000149294	NCAM1	Homo sapiens	neural cell adhesion molecule 1(NCAM1)
ENSG00000092199	HNRNPC	Homo sapiens	heterogeneous nuclear ribonucleoprotein C (C1/C2)(HNRNPC)
ENSG00000110700	RPS13	Homo sapiens	ribosomal protein S13(RPS13)
ENSG00000242265	PEG10	Homo sapiens	paternally expressed 10(PEG10)
ENSG00000198589	LRBA	Homo sapiens	LPS responsive beige-like anchor protein(LRBA)
ENSG00000084207	GSTP1	Homo sapiens	glutathione S-transferase pi 1(GSTP1)
ENSG00000142541	RPL13A	Homo sapiens	ribosomal protein L13a(RPL13A)
ENSG00000086758	HUWE1	Homo sapiens	HECT, UBA and WWE domain containing 1, E3 ubiquitin protein ligase(HUWE1)
ENSG00000117450	PRDX1	Homo sapiens	peroxiredoxin 1(PRDX1)
ENSG00000142669	SH3BGRL3	Homo sapiens	SH3 domain binding glutamate rich protein like 3(SH3BGRL3)
ENSG00000105223	PLD3	Homo sapiens	phospholipase D family member 3(PLD3)
ENSG00000075624	ACTB	Homo sapiens	actin beta(ACTB)
ENSG00000198695	ND6	Homo sapiens	NADH dehydrogenase, subunit 6 (complex I)(ND6)
ENSG00000072110	ACTN1	Homo sapiens	actinin alpha 1(ACTN1)
ENSG00000196154	S100A4	Homo sapiens	S100 calcium binding protein A4(S100A4)
ENSG00000276293	PIP4K2B	Homo sapiens	phosphatidylinositol-5-phosphate 4-kinase type 2 beta(PIP4K2B)
ENSG00000154518	ATP5G3	Homo sapiens	ATP synthase, H+ transporting, mitochondrial Fo complex subunit C3 (subunit 9)(ATP5G3)
ENSG00000115268	RPS15	Homo sapiens	ribosomal protein S15(RPS15)
ENSG00000115266	APC2	Homo sapiens	APC2, WNT signaling pathway regulator(APC2)
ENSG00000143621	ILF2	Homo sapiens	interleukin enhancer binding factor 2(ILF2)
ENSG00000145920	CPLX2	Homo sapiens	complexin 2(CPLX2)
ENSG00000144713	RPL32	Homo sapiens	ribosomal protein L32(RPL32)
ENSG00000120885	MIR6843	Homo sapiens	microRNA 6843(MIR6843)
ENSG00000165671	NSD1	Homo sapiens	nuclear receptor binding SET domain protein 1(NSD1)
ENSG00000164107	HAND2	Homo sapiens	heart and neural crest derivatives expressed 2(HAND2)
ENSG00000167614	TTYH1	Homo sapiens	tweety family member 1(TTYH1)
ENSG00000164587	RPS14	Homo sapiens	ribosomal protein S14(RPS14)
ENSG00000168824	NSG1	Homo sapiens	neuron specific gene family member 1(NSG1)
ENSG00000075618	FSCN1	Homo sapiens	fascin actin-bundling protein 1(FSCN1)
ENSG00000142534	RPS11	Homo sapiens	ribosomal protein S11(RPS11)
ENSG00000164104	HMGB2	Homo sapiens	high mobility group box 2(HMGB2)
ENSG00000165434	PGM2L1	Homo sapiens	phosphoglucomutase 2 like 1(PGM2L1)
ENSG00000167978	SRRM2	Homo sapiens	serine/arginine repetitive matrix 2(SRRM2)
ENSG00000149273	RPS3	Homo sapiens	ribosomal protein S3(RPS3)
ENSG00000069275	NUCKS1	Homo sapiens	nuclear casein kinase and cyclin dependent kinase substrate 1(NUCKS1)
ENSG00000106105	GARS	Homo sapiens	glycyl-tRNA synthetase(GARS)
ENSG00000131747	TOP2A	Homo sapiens	topoisomerase (DNA) II alpha(TOP2A)
ENSG00000213923	LOC400927-CSNK1E	Homo sapiens	LOC400927-CSNK1E readthrough(LOC400927-CSNK1E)
ENSG00000117114	ADGRL2	Homo sapiens	adhesion G protein-coupled receptor L2(ADGRL2)
ENSG00000136193	SCRN1	Homo sapiens	secernin 1(SCRN1)
ENSG00000137285	TUBB2B	Homo sapiens	tubulin beta 2B class IIb(TUBB2B)
ENSG00000143612	c1orf43	Homo sapiens	chromosome 1 open reading frame 43(C1orf43)
ENSG00000115053	NCL	Homo sapiens	nucleolin(NCL)
ENSG00000117592	PRDX6	Homo sapiens	peroxiredoxin 6(PRDX6)
ENSG00000188322	SBK1	Homo sapiens	SH3 domain binding kinase 1(SBK1)
ENSG00000167508	MVD	Homo sapiens	mevalonate diphosphate decarboxylase(MVD)
ENSG00000105372	RPS19	Homo sapiens	ribosomal protein S19(RPS19)
ENSG00000109971	HSPA8	Homo sapiens	heat shock protein family A (Hsp70) member 8(HSPA8)
ENSG00000110955	ATP5B	Homo sapiens	ATP synthase, H+ transporting, mitochondrial F1 complex, beta polypeptide(ATP5B)
ENSG00000175130	MARCKSL1	Homo sapiens	MARCKS like 1(MARCKSL1)
ENSG00000108518	PFN1	Homo sapiens	profilin 1(PFN1)
ENSG00000220205	VAMP2	Homo sapiens	vesicle associated membrane protein 2(VAMP2)
ENSG00000148053	NTRK2	Homo sapiens	neurotrophic receptor tyrosine kinase 2(NTRK2)
ENSG00000178403	NEUROG2	Homo sapiens	neurogenin 2(NEUROG2)
ENSG00000152795	HNRNPDL	Homo sapiens	heterogeneous nuclear ribonucleoprotein D like(HNRNPDL)
ENSG00000118785	SPP1	Homo sapiens	secreted phosphoprotein 1(SPP1)
ENSG00000167996	FTH1	Homo sapiens	ferritin heavy chain 1(FTH1)
ENSG00000116133	DHCR24	Homo sapiens	24-dehydrocholesterol reductase(DHCR24)
ENSG00000116251	RPL22	Homo sapiens	ribosomal protein L22(RPL22)
ENSG00000132718	SYT11	Homo sapiens	synaptotagmin 11(SYT11)
ENSG00000131507	NDFIP1	Homo sapiens	Nedd4 family interacting protein 1(NDFIP1)
ENSG00000189403	HMGB1	Homo sapiens	high mobility group box 1(HMGB1)
ENSG00000169813	HNRNPF	Homo sapiens	heterogeneous nuclear ribonucleoprotein F(HNRNPF)
ENSG00000166426	CRABP1	Homo sapiens	cellular retinoic acid binding protein 1(CRABP1)
ENSG00000187109	NAP1L1	Homo sapiens	nucleosome assembly protein 1 like 1(NAP1L1)
ENSG00000213741	LOC100288910	Homo sapiens	uncharacterized LOC100288910(LOC100288910)
ENSG00000107731	UNC5B	Homo sapiens	unc-5 netrin receptor B(UNC5B)
ENSG00000075415	SLC25A3	Homo sapiens	solute carrier family 25 member 3(SLC25A3)
ENSG00000130513	GDF15	Homo sapiens	growth differentiation factor 15(GDF15)
ENSG00000070087	PFN2	Homo sapiens	profilin 2(PFN2)
ENSG00000099622	CIRBP	Homo sapiens	cold inducible RNA binding protein(CIRBP)
ENSG00000015592	STMN4	Homo sapiens	stathmin 4(STMN4)
ENSG00000153879	CEBPG	Homo sapiens	CCAAT/enhancer binding protein gamma(CEBPG)
ENSG00000120708	TGFBI	Homo sapiens	transforming growth factor beta induced(TGFBI)
ENSG00000108828	VAT1	Homo sapiens	vesicle amine transport 1(VAT1)
ENSG00000137267	TUBB2A	Homo sapiens	tubulin beta 2A class IIa(TUBB2A)
ENSG00000065978	YBX1	Homo sapiens	Y-box binding protein 1(YBX1)
ENSG00000116560	SFPQ	Homo sapiens	splicing factor proline and glutamine rich(SFPQ)
ENSG00000165462	PHOX2A	Homo sapiens	paired like homeobox 2a(PHOX2A)
ENSG00000136295	TTYH3	Homo sapiens	tweety family member 3(TTYH3)
ENSG00000163041	H3F3A	Homo sapiens	H3 histone family member 3A(H3F3A)
ENSG00000188229	TUBB4B	Homo sapiens	tubulin beta 4B class IVb(TUBB4B)
ENSG00000103257	SLC7A5	Homo sapiens	solute carrier family 7 member 5(SLC7A5)
ENSG00000167526	RPL13	Homo sapiens	ribosomal protein L13(RPL13)
ENSG00000142864	SERBP1	Homo sapiens	SERPINE1 mRNA binding protein 1(SERBP1)
ENSG00000015479	MATR3	Homo sapiens	matrin 3(MATR3)
ENSG00000128564	VGF	Homo sapiens	VGF nerve growth factor inducible(VGF)
ENSG00000130522	jund	Homo sapiens	JunD proto-oncogene, AP-1 transcription factor subunit(JUND)
ENSG00000130402	ACTN4	Homo sapiens	actinin alpha 4(ACTN4)
ENSG00000147065	MSN	Homo sapiens	moesin(MSN)
ENSG00000149485	MIR1908	Homo sapiens	microRNA 1908(MIR1908)
ENSG00000105426	PTPRS	Homo sapiens	protein tyrosine phosphatase, receptor type S(PTPRS)
ENSG00000264364	DYNLL2	Homo sapiens	dynein light chain LC8-type 2(DYNLL2)
ENSG00000117523	PRRC2C	Homo sapiens	proline rich coiled-coil 2C(PRRC2C)
ENSG00000113161	HMGCR	Homo sapiens	3-hydroxy-3-methylglutaryl-CoA reductase(HMGCR)
ENSG00000169710	FASN	Homo sapiens	fatty acid synthase(FASN)
ENSG00000163171	CDC42EP3	Homo sapiens	CDC42 effector protein 3(CDC42EP3)
ENSG00000159164	SV2A	Homo sapiens	synaptic vesicle glycoprotein 2A(SV2A)
ENSG00000137154	RPS6	Homo sapiens	ribosomal protein S6(RPS6)
ENSG00000280987	MATR3	Homo sapiens	matrin 3(MATR3)
ENSG00000166441	RPL27A	Homo sapiens	ribosomal protein L27a(RPL27A)
ENSG00000143947	RPS27A	Homo sapiens	ribosomal protein S27a(RPS27A)
ENSG00000165119	HNRNPK	Homo sapiens	heterogeneous nuclear ribonucleoprotein K(HNRNPK)
ENSG00000167658	EEF2	Homo sapiens	eukaryotic translation elongation factor 2(EEF2)
ENSG00000141522	ARHGDIA	Homo sapiens	Rho GDP dissociation inhibitor alpha(ARHGDIA)
ENSG00000277586	NEFL	Homo sapiens	neurofilament, light polypeptide(NEFL)
ENSG00000169714	CNBP	Homo sapiens	CCHC-type zinc finger nucleic acid binding protein(CNBP)
ENSG00000100097	LGALS1	Homo sapiens	galectin 1(LGALS1)
ENSG00000135069	PSAT1	Homo sapiens	phosphoserine aminotransferase 1(PSAT1)
ENSG00000026025	VIM	Homo sapiens	vimentin(VIM)
ENSG00000242125	SNHG3	Homo sapiens	small nucleolar RNA host gene 3(SNHG3)
ENSG00000116584	ARHGEF2	Homo sapiens	Rho/Rac guanine nucleotide exchange factor 2(ARHGEF2)
ENSG00000143933	CALM2	Homo sapiens	calmodulin 2(CALM2)
ENSG00000084234	APLP2	Homo sapiens	amyloid beta precursor like protein 2(APLP2)
ENSG00000234745	HLA-B	Homo sapiens	major histocompatibility complex, class I, B(HLA-B)
ENSG00000130726	TRIM28	Homo sapiens	tripartite motif containing 28(TRIM28)
ENSG00000234741	gas5	Homo sapiens	growth arrest specific 5 (non-protein coding)(GAS5)
ENSG00000103034	NDRG4	Homo sapiens	NDRG family member 4(NDRG4)
ENSG00000105323	HNRNPUL1	Homo sapiens	heterogeneous nuclear ribonucleoprotein U like 1(HNRNPUL1)
ENSG00000131711	MAP1B	Homo sapiens	microtubule associated protein 1B(MAP1B)
ENSG00000130985	UBA1	Homo sapiens	ubiquitin like modifier activating enzyme 1(UBA1)
ENSG00000108953	YWHAE	Homo sapiens	tyrosine 3-monooxygenase/tryptophan 5-monooxygenase activation protein epsilon(YWHAE)
ENSG00000198034	RPS4X	Homo sapiens	ribosomal protein S4, X-linked(RPS4X)
ENSG00000105568	PPP2R1A	Homo sapiens	protein phosphatase 2 scaffold subunit Aalpha(PPP2R1A)
ENSG00000115009	CCL20	Homo sapiens	C-C motif chemokine ligand 20(CCL20)
ENSG00000139438	FAM222A	Homo sapiens	family with sequence similarity 222 member A(FAM222A)
ENSG00000139318	DUSP6	Homo sapiens	dual specificity phosphatase 6(DUSP6)
ENSG00000136167	LCP1	Homo sapiens	lymphocyte cytosolic protein 1(LCP1)
ENSG00000159140	MIR6501	Homo sapiens	microRNA 6501(MIR6501)
ENSG00000114391	RPL24	Homo sapiens	ribosomal protein L24(RPL24)
ENSG00000167552	TUBA1A	Homo sapiens	tubulin alpha 1a(TUBA1A)
ENSG00000143924	EML4	Homo sapiens	echinoderm microtubule associated protein like 4(EML4)
ENSG00000258947	TUBB3	Homo sapiens	tubulin beta 3 class III(TUBB3)
ENSG00000277443	MARCKS	Homo sapiens	myristoylated alanine rich protein kinase C substrate(MARCKS)
ENSG00000128872	TMOD2	Homo sapiens	tropomodulin 2(TMOD2)
ENSG00000241697	TMEFF1	Homo sapiens	transmembrane protein with EGF like and two follistatin like domains 1(TMEFF1)
ENSG00000147274	RBMX	Homo sapiens	RNA binding motif protein, X-linked(RBMX)
ENSG00000142937	RPS8	Homo sapiens	ribosomal protein S8(RPS8)
ENSG00000104549	SQLE	Homo sapiens	squalene epoxidase(SQLE)
ENSG00000153956	CACNA2D1	Homo sapiens	calcium voltage-gated channel auxiliary subunit alpha2delta 1(CACNA2D1)
ENSG00000115677	HDLBP	Homo sapiens	high density lipoprotein binding protein(HDLBP)
ENSG00000269900	RMRP	Homo sapiens	RNA component of mitochondrial RNA processing endoribonuclease(RMRP)
ENSG00000115310	RTN4	Homo sapiens	reticulon 4(RTN4)
ENSG00000139644	TMBIM6	Homo sapiens	transmembrane BAX inhibitor motif containing 6(TMBIM6)
ENSG00000113013	HSPA9	Homo sapiens	heat shock protein family A (Hsp70) member 9(HSPA9)
ENSG00000233718	MYCNOS	Homo sapiens	MYCN opposite strand(MYCNOS)
ENSG00000166598	MIR3652	Homo sapiens	microRNA 3652(MIR3652)
ENSG00000154917	RAB6B	Homo sapiens	RAB6B, member RAS oncogene family(RAB6B)
ENSG00000054523	KIF1B	Homo sapiens	kinesin family member 1B(KIF1B)
ENSG00000130707	ASS1	Homo sapiens	argininosuccinate synthase 1(ASS1)
ENSG00000175061	LRRC75A-AS1	Homo sapiens	LRRC75A antisense RNA 1(LRRC75A-AS1)
ENSG00000102003	SYP	Homo sapiens	synaptophysin(SYP)
ENSG00000148248	SURF4	Homo sapiens	surfeit 4(SURF4)
ENSG00000126214	KLC1	Homo sapiens	kinesin light chain 1(KLC1)
ENSG00000053438	NNAT	Homo sapiens	neuronatin(NNAT)
ENSG00000254772	EEF1G	Homo sapiens	eukaryotic translation elongation factor 1 gamma(EEF1G)
ENSG00000176165	FOXG1	Homo sapiens	forkhead box G1(FOXG1)
ENSG00000130723	PRRC2B	Homo sapiens	proline rich coiled-coil 2B(PRRC2B)
ENSG00000147140	NONO	Homo sapiens	non-POU domain containing, octamer-binding(NONO)
ENSG00000067840	PDZD4	Homo sapiens	PDZ domain containing 4(PDZD4)
ENSG00000138326	RPS24	Homo sapiens	ribosomal protein S24(RPS24)
ENSG00000228253	ATP8	Homo sapiens	ATP synthase F0 subunit 8(ATP8)
ENSG00000115306	SPTBN1	Homo sapiens	spectrin beta, non-erythrocytic 1(SPTBN1)
ENSG00000117724	CENPF	Homo sapiens	centromere protein F(CENPF)
ENSG00000171951	SCG2	Homo sapiens	secretogranin II(SCG2)
ENSG00000096384	HSP90AB1	Homo sapiens	heat shock protein 90 alpha family class B member 1(HSP90AB1)
ENSG00000110092	CCND1	Homo sapiens	cyclin D1(CCND1)
ENSG00000169752	NRG4	Homo sapiens	neuregulin 4(NRG4)
ENSG00000221983	UBA52	Homo sapiens	ubiquitin A-52 residue ribosomal protein fusion product 1(UBA52)
ENSG00000169992	NLGN2	Homo sapiens	neuroligin 2(NLGN2)
ENSG00000157064	NMNAT2	Homo sapiens	nicotinamide nucleotide adenylyltransferase 2(NMNAT2)
ENSG00000105894	PTN	Homo sapiens	pleiotrophin(PTN)
ENSG00000117519	CNN3	Homo sapiens	calponin 3(CNN3)
ENSG00000135387	CAPRIN1	Homo sapiens	cell cycle associated protein 1(CAPRIN1)
ENSG00000115457	IGFBP2	Homo sapiens	insulin like growth factor binding protein 2(IGFBP2)
ENSG00000227051	C14orf132	Homo sapiens	chromosome 14 open reading frame 132(C14orf132)
ENSG00000202198	rn7sk	Homo sapiens	RNA, 7SK small nuclear(RN7SK)
ENSG00000117632	MIR3917	Homo sapiens	microRNA 3917(MIR3917)
ENSG00000229117	RPL41	Homo sapiens	ribosomal protein L41(RPL41)
ENSG00000134294	SLC38A2	Homo sapiens	solute carrier family 38 member 2(SLC38A2)
ENSG00000204256	BRD2	Homo sapiens	bromodomain containing 2(BRD2)
ENSG00000128739	SNRPN	Homo sapiens	small nuclear ribonucleoprotein polypeptide N(SNRPN)
ENSG00000140988	RPS2	Homo sapiens	ribosomal protein S2(RPS2)
ENSG00000118816	CCNI	Homo sapiens	cyclin I(CCNI)
ENSG00000172809	RPL38	Homo sapiens	ribosomal protein L38(RPL38)
ENSG00000125107	CNOT1	Homo sapiens	CCR4-NOT transcription complex subunit 1(CNOT1)
ENSG00000160710	ADAR	Homo sapiens	adenosine deaminase, RNA specific(ADAR)
ENSG00000182985	CADM1	Homo sapiens	cell adhesion molecule 1(CADM1)
ENSG00000102265	TIMP1	Homo sapiens	TIMP metallopeptidase inhibitor 1(TIMP1)
ENSG00000104435	STMN2	Homo sapiens	stathmin 2(STMN2)
ENSG00000139514	SLC7A1	Homo sapiens	solute carrier family 7 member 1(SLC7A1)
ENSG00000138668	HNRNPD	Homo sapiens	heterogeneous nuclear ribonucleoprotein D(HNRNPD)
ENSG00000264462	MIR3648-2	Homo sapiens	microRNA 3648-2(MIR3648-2)
ENSG00000105409	ATP1A3	Homo sapiens	ATPase Na+/K+ transporting subunit alpha 3(ATP1A3)
ENSG00000136485	DCAF7	Homo sapiens	DDB1 and CUL4 associated factor 7(DCAF7)
ENSG00000179218	CALR	Homo sapiens	calreticulin(CALR)
ENSG00000066735	KIF26A	Homo sapiens	kinesin family member 26A(KIF26A)
ENSG00000117984	CTSD	Homo sapiens	cathepsin D(CTSD)
ENSG00000114353	GNAI2	Homo sapiens	G protein subunit alpha i2(GNAI2)
ENSG00000071082	RPL31	Homo sapiens	ribosomal protein L31(RPL31)
ENSG00000171724	VAT1L	Homo sapiens	vesicle amine transport 1 like(VAT1L)
ENSG00000171603	CLSTN1	Homo sapiens	calsyntenin 1(CLSTN1)
ENSG00000113140	SPARC	Homo sapiens	secreted protein acidic and cysteine rich(SPARC)
ENSG00000135390	ATP5G2	Homo sapiens	ATP synthase, H+ transporting, mitochondrial Fo complex subunit C2 (subunit 9)(ATP5G2)
ENSG00000274012	RN7SL2	Homo sapiens	RNA, 7SL, cytoplasmic 2(RN7SL2)
ENSG00000137331	IER3	Homo sapiens	immediate early response 3(IER3)
ENSG00000213190	MLLT11	Homo sapiens	myeloid/lymphoid or mixed-lineage leukemia; translocated to, 11(MLLT11)
ENSG00000170759	KIF5B	Homo sapiens	kinesin family member 5B(KIF5B)
ENSG00000118705	RPN2	Homo sapiens	ribophorin II(RPN2)
ENSG00000205336	ADGRG1	Homo sapiens	adhesion G protein-coupled receptor G1(ADGRG1)
ENSG00000188157	AGRN	Homo sapiens	agrin(AGRN)
ENSG00000149428	HYOU1	Homo sapiens	hypoxia up-regulated 1(HYOU1)
ENSG00000129951	PLPPR3	Homo sapiens	phospholipid phosphatase related 3(PLPPR3)
ENSG00000105640	RPL18A	Homo sapiens	ribosomal protein L18a(RPL18A)
ENSG00000002834	LASP1	Homo sapiens	LIM and SH3 protein 1(LASP1)
ENSG00000179348	GATA2	Homo sapiens	GATA binding protein 2(GATA2)
ENSG00000116729	WLS	Homo sapiens	wntless Wnt ligand secretion mediator(WLS)
ENSG00000181541	MAB21L2	Homo sapiens	mab-21 like 2(MAB21L2)
ENSG00000137309	HMGA1	Homo sapiens	high mobility group AT-hook 1(HMGA1)
ENSG00000179222	MAGED1	Homo sapiens	MAGE family member D1(MAGED1)
ENSG00000164091	WDR82	Homo sapiens	WD repeat domain 82(WDR82)
ENSG00000135486	HNRNPA1	Homo sapiens	heterogeneous nuclear ribonucleoprotein A1(HNRNPA1)
ENSG00000159335	PTMS	Homo sapiens	parathymosin(PTMS)
ENSG00000138757	G3BP2	Homo sapiens	G3BP stress granule assembly factor 2(G3BP2)
ENSG00000138758	SEPT11	Homo sapiens	septin 11(SEPT11)
ENSG00000171863	RPS7	Homo sapiens	ribosomal protein S7(RPS7)
ENSG00000171858	RPS21	Homo sapiens	ribosomal protein S21(RPS21)
ENSG00000170889	RPS9	Homo sapiens	ribosomal protein S9(RPS9)
ENSG00000007168	PAFAH1B1	Homo sapiens	platelet activating factor acetylhydrolase 1b regulatory subunit 1(PAFAH1B1)
ENSG00000171617	ENC1	Homo sapiens	ectodermal-neural cortex 1(ENC1)
ENSG00000167244	IGF2	Homo sapiens	insulin like growth factor 2(IGF2)
ENSG00000189159	HN1	Homo sapiens	hematological and neurological expressed 1(HN1)
ENSG00000123384	LRP1	Homo sapiens	LDL receptor related protein 1(LRP1)
ENSG00000169429	CXCL8	Homo sapiens	C-X-C motif chemokine ligand 8(CXCL8)
ENSG00000125691	RPL23	Homo sapiens	ribosomal protein L23(RPL23)
ENSG00000140945	CDH13	Homo sapiens	cadherin 13(CDH13)
ENSG00000168461	RAB31	Homo sapiens	RAB31, member RAS oncogene family(RAB31)
ENSG00000152932	RAB3C	Homo sapiens	RAB3C, member RAS oncogene family(RAB3C)
ENSG00000150991	UBC	Homo sapiens	ubiquitin C(UBC)
ENSG00000173812	EIF1	Homo sapiens	eukaryotic translation initiation factor 1(EIF1)
ENSG00000011600	TYROBP	Homo sapiens	TYRO protein tyrosine kinase binding protein(TYROBP)
ENSG00000168348	INSM2	Homo sapiens	INSM transcriptional repressor 2(INSM2)
ENSG00000030582	GRN	Homo sapiens	granulin precursor(GRN)
ENSG00000139970	RTN1	Homo sapiens	reticulon 1(RTN1)
ENSG00000150625	GPM6A	Homo sapiens	glycoprotein M6A(GPM6A)
ENSG00000231500	RPS18	Homo sapiens	ribosomal protein S18(RPS18)
ENSG00000166165	CKB	Homo sapiens	creatine kinase B(CKB)
ENSG00000102316	MAGED2	Homo sapiens	MAGE family member D2(MAGED2)
ENSG00000063046	EIF4B	Homo sapiens	eukaryotic translation initiation factor 4B(EIF4B)
ENSG00000018236	CNTN1	Homo sapiens	contactin 1(CNTN1)
ENSG00000169439	SDC2	Homo sapiens	syndecan 2(SDC2)
ENSG00000148798	INA	Homo sapiens	internexin neuronal intermediate filament protein alpha(INA)
ENSG00000182899	RPL35A	Homo sapiens	ribosomal protein L35a(RPL35A)
ENSG00000104408	EIF3E	Homo sapiens	eukaryotic translation initiation factor 3 subunit E(EIF3E)
ENSG00000133048	CHI3L1	Homo sapiens	chitinase 3 like 1(CHI3L1)
ENSG00000080824	HSP90AA1	Homo sapiens	heat shock protein 90 alpha family class A member 1(HSP90AA1)
ENSG00000212907	ND4L	Homo sapiens	NADH dehydrogenase, subunit 4L (complex I)(ND4L)
ENSG00000102109	PCSK1N	Homo sapiens	proprotein convertase subtilisin/kexin type 1 inhibitor(PCSK1N)
ENSG00000102226	USP11	Homo sapiens	ubiquitin specific peptidase 11(USP11)
ENSG00000090621	PABPC4	Homo sapiens	poly(A) binding protein cytoplasmic 4(PABPC4)
ENSG00000100167	SEPT3	Homo sapiens	septin 3(SEPT3)
ENSG00000010404	IDS	Homo sapiens	iduronate 2-sulfatase(IDS)
ENSG00000084070	SMAP2	Homo sapiens	small ArfGAP2(SMAP2)
ENSG00000101255	TRIB3	Homo sapiens	tribbles pseudokinase 3(TRIB3)
ENSG00000148303	RPL7A	Homo sapiens	ribosomal protein L7a(RPL7A)
ENSG00000084073	ZMPSTE24	Homo sapiens	zinc metallopeptidase STE24(ZMPSTE24)
ENSG00000087460	GNAS	Homo sapiens	GNAS complex locus(GNAS)
ENSG00000182768	NGRN	Homo sapiens	neugrin, neurite outgrowth associated(NGRN)
ENSG00000117707	PROX1	Homo sapiens	prospero homeobox 1(PROX1)
ENSG00000135111	TBX3	Homo sapiens	T-box 3(TBX3)
ENSG00000115524	SF3B1	Homo sapiens	splicing factor 3b subunit 1(SF3B1)
ENSG00000171533	MAP6	Homo sapiens	microtubule associated protein 6(MAP6)
ENSG00000114554	plxna1	Homo sapiens	plexin A1(PLXNA1)
ENSG00000136689	IL1RN	Homo sapiens	interleukin 1 receptor antagonist(IL1RN)
ENSG00000116852	KIF21B	Homo sapiens	kinesin family member 21B(KIF21B)
ENSG00000110076	NRXN2	Homo sapiens	neurexin 2(NRXN2)
ENSG00000196924	FLNA	Homo sapiens	filamin A(FLNA)
ENSG00000170558	CDH2	Homo sapiens	cadherin 2(CDH2)
ENSG00000170315	UBB	Homo sapiens	ubiquitin B(UBB)
ENSG00000255717	SNHG1	Homo sapiens	small nucleolar RNA host gene 1(SNHG1)
ENSG00000168003	SLC3A2	Homo sapiens	solute carrier family 3 member 2(SLC3A2)
ENSG00000127616	SMARCA4	Homo sapiens	SWI/SNF related, matrix associated, actin dependent regulator of chromatin, subfamily a, member 4(SMARCA4)
ENSG00000054793	ATP9A	Homo sapiens	ATPase phospholipid transporting 9A (putative)(ATP9A)
ENSG00000101126	ADNP	Homo sapiens	activity dependent neuroprotector homeobox(ADNP)
ENSG00000161970	RPL26	Homo sapiens	ribosomal protein L26(RPL26)
ENSG00000179010	MRFAP1	Homo sapiens	Morf4 family associated protein 1(MRFAP1)
ENSG00000148773	MKI67	Homo sapiens	marker of proliferation Ki-67(MKI67)
ENSG00000181449	SOX2	Homo sapiens	SRY-box 2(SOX2)
ENSG00000031698	SARS	Homo sapiens	seryl-tRNA synthetase(SARS)
ENSG00000272398	CD24	Homo sapiens	CD24 molecule(CD24)

## Sheet: KEGG 2021 Human
Term	Overlap	P-value	Adjusted P-value	Old P-value	Old Adjusted P-value	Odds Ratio	Combined Score	Genes
Ribosome	68/158	4.96646e-59	1.29128e-56	0	0	25.1369	3374.62	RPL4;RPL5;RPL30;RPL3;RPL32;RPL31;RPL34;RPLP1;RPLP0;RPL10A;RPL9;RPL6;RPL7;RPS15;RPS4X;RPS14;RPL7A;RPS16;RPL18A;RPS19;RPS18;RPL36;RPL35;RPLP2;RPL38;RPL37;RPS11;RPL39;RPS13;RPS12;RPS9;RPL21;RPS7;RPS8;RPL23;RPS5;RPL22;RPS6;RPL13A;RPSA;RPS3A;RPL37A;RPL24;RPL27;RPL26;RPL29;UBA52;RPL10;RPL12;RPL11;RPL14;RPS3;RPL13;RPL15;RPS2;RPL18;RPS27A;RPL19;RPL41;RPL35A;RPS25;RPS27;RPL27A;RPS20;FAU;RPS21;RPS24;RPS23
Coronavirus disease	71/232	1.9966e-49	2.59558e-47	0	0	14.6937	1647.68	RPL4;RPL5;RPL30;RPL3;CXCL8;RPL32;RPL31;RPL34;RPLP1;RPLP0;ADAR;RPL10A;RPL9;RPL6;RPL7;RPS15;RPS4X;RPS14;RPL7A;RPS16;RPL18A;RPS19;RPS18;RPL36;RPL35;RPLP2;RPL38;RPL37;RPS11;RPL39;RPS13;RPS12;RPS9;RPL21;RPS7;RPS8;RPL23;RPS5;RPL22;RPS6;RPL13A;RPSA;RPS3A;IL1B;RPL37A;RPL24;RPL27;RPL26;RPL29;UBA52;RPL10;RPL12;RPL11;RPL14;RPS3;RPL13;RPL15;RPS2;RPL18;RPS27A;RPL19;RPL41;RPL35A;RPS25;RPS27;RPL27A;RPS20;FAU;RP…
Parkinson disease	40/249	4.2922e-17	3.7199e-15	0	0	6.03612	227.484	ND6;ATP8;ATP6;KLC1;UQCRH;GNAI2;TUBA1B;UCHL1;TUBA1A;UBB;KIF5C;TUBB3;KIF5B;KIF5A;UBC;COX3;COX2;COX1;RPS27A;HSPA5;TUBB;ND4L;TUBB4B;TUBB2B;TUBB2A;GNAS;CALM3;ND1;UBA1;MAPT;CYTB;CALM1;ND3;UBA52;CALM2;ND2;ND5;ATF4;ND4;SLC25A6
Pathways of neurodegeneration	50/475	2.13145e-13	1.38544e-11	0	0	3.73002	108.83	APP;ATP2A2;TUBA1B;UCHL1;TUBA1A;TUBB3;KIF5C;KIF5B;KIF5A;NEFL;NEFM;APC2;TUBB;TUBB2B;TUBB2A;IL1B;ND1;MAPT;ND3;UBA52;ND2;SQSTM1;ND5;ATF4;ND4;SLC25A6;ND6;ATP8;DCTN1;ATP6;KLC1;UQCRH;UBB;UBC;COX3;COX2;COX1;RPS27A;PRPH;HSPA5;FUS;ND4L;TUBB4B;CTNNB1;CALM3;UBA1;CYTB;CALM1;CALM2;CDK5R1
Amyotrophic lateral sclerosis	42/364	9.31332e-13	4.84293e-11	0	0	4.10298	113.661	ND6;ATP8;DCTN1;ATP6;KLC1;ACTB;UQCRH;ACTG1;TUBA1B;TUBA1A;KIF5C;TUBB3;KIF5B;KIF5A;TPR;COX3;COX2;NEFL;COX1;NEFM;HNRNPA1;PRPH;HSPA5;FUS;TUBB;ND4L;TUBB4B;TUBB2B;TUBB2A;NRG4;HNRNPA2B1;MATR3;ND1;CYTB;PFN1;ND3;ND2;SQSTM1;ND5;ATF4;PFN2;ND4
Alzheimer disease	41/369	5.96093e-12	2.58307e-10	0	0	3.9243	101.427	APP;ND6;RTN3;LRP1;ATP8;ATP6;ATP2A2;KLC1;RTN4;UQCRH;TUBA1B;TUBA1A;KIF5C;TUBB3;KIF5B;KIF5A;COX3;COX2;COX1;APC2;TUBB;ND4L;TUBB4B;TUBB2B;TUBB2A;IL1B;CTNNB1;CALM3;ND1;MAPT;CYTB;CALM1;ND3;CALM2;ND2;GAPDH;ND5;ATF4;CDK5R1;ND4;SLC25A6
Salmonella infection	31/249	1.39007e-10	5.16313e-09	0	0	4.41726	100.256	CXCL8;HSP90AB1;AHNAK;DCTN1;KLC1;ACTB;ACTG1;CDC42;TUBA1B;TUBA1A;KIF5C;TUBB3;KIF5B;KIF5A;RPS3;FLNA;DYNC1H1;ACTR2;HSP90AA1;TUBB;TUBB4B;DYNLL2;RHOA;TUBB2B;TUBB2A;ARPC2;IL1B;CTNNB1;PFN1;GAPDH;PFN2
Prion disease	31/273	1.38786e-09	4.51053e-08	0	0	3.97419	81.0557	ND6;ATP8;ATP6;KLC1;UQCRH;TUBA1B;TUBA1A;KIF5C;TUBB3;KIF5B;KIF5A;COX3;COX2;COX1;NCAM1;HSPA8;HSPA5;TUBB;ND4L;TUBB4B;TUBB2B;TUBB2A;IL1B;ND1;CYTB;ND3;ND2;ND5;ATF4;ND4;SLC25A6
Huntington disease	30/306	7.50781e-08	2.16892e-06	0	0	3.36076	55.1323	ND6;ATP8;DCTN1;CLTC;ATP6;KLC1;UQCRH;TUBA1B;TUBA1A;KIF5C;TUBB3;KIF5B;KIF5A;COX3;COX2;COX1;AP2M1;TUBB;ND4L;AP2B1;TUBB4B;TUBB2B;TUBB2A;ND1;CYTB;ND3;ND2;ND5;ND4;SLC25A6
Pathogenic Escherichia coli infection	22/197	4.56278e-07	1.18632e-05	0	0	3.85752	56.3204	ACTR2;CXCL8;TUBB;MYO5A;TUBB4B;ACTB;RHOA;ACTG1;CDC42;TUBA1B;TUBB2B;TUBA1A;TUBB2A;ARPC2;TUBB3;IL1B;NCL;RPS3;MYH9;TMBIM6;ARHGEF2;GAPDH
Diabetic cardiomyopathy	20/203	1.03023e-05	0.000243508	0	0	3.34144	38.3702	ND6;PARP1;ATP8;ATP6;ATP2A2;ND4L;MMP9;UQCRH;COX3;COX2;COX1;ND1;CYTB;ND3;CTSD;ND2;GAPDH;ND5;ND4;SLC25A6
Fluid shear stress and atherosclerosis	16/139	1.1304e-05	0.000244919	0	0	3.96428	45.1546	HSP90AA1;HSP90AB1;SDC2;GSTP1;MMP9;ACTB;RHOA;ASS1;ACTG1;IL1B;CTNNB1;CALM3;ARHGEF2;CALM1;SQSTM1;CALM2
Human cytomegalovirus infection	20/225	4.58928e-05	0.000917856	0	0	2.97942	29.762	CDKN1A;CXCL8;HLA-B;HLA-A;RHOA;GNAI2;CDK6;GNG2;CCND1;IL1B;GNB1;EIF4EBP1;GNAS;CTNNB1;CALM3;CALR;CALM1;B2M;CALM2;ATF4
Oxidative phosphorylation	14/133	0.000105677	0.00173605	0	0	3.57476	32.7274	ND6;ATP8;ATP6;ND4L;UQCRH;COX3;COX2;ND1;COX1;CYTB;ND3;ND2;ND5;ND4
Viral carcinogenesis	18/203	0.000112014	0.00173605	0	0	2.96502	26.9724	YWHAE;CDKN1A;YWHAB;ACTN1;HLA-B;CHD4;ACTN4;HLA-A;YWHAZ;RHOA;CDC42;HNRNPK;CDK6;PKM;CCND1;YWHAQ;YWHAG;ATF4
RNA transport	17/186	0.000119169	0.00173605	0	0	3.0631	27.675	FUS;PABPC4;SNORD3A;EIF1;EEF1A1;XPOT;EEF1A2;TPR;EIF4EBP1;EIF3E;EIF3D;KPNB1;EIF4G2;EIF4B;EIF3A;RAN;EIF4G1
Tight junction	16/169	0.000124282	0.00173605	0	0	3.182	28.6156	ACTR2;ACTN1;MSN;ACTN4;ACTB;RHOA;ACTG1;CDC42;MYL6;TUBA1B;TUBA1A;CCND1;ARPC2;PPP2R1A;MYH9;ARHGEF2
Phagosome	15/152	0.000126324	0.00173605	0	0	3.32902	29.8835	DYNC1H1;TUBB;ITGB2;HLA-B;HLA-A;TUBB4B;ACTB;ACTG1;TUBA1B;TUBB2B;TUBA1A;TUBB2A;TUBB3;CANX;CALR
Proteoglycans in cancer	18/205	0.000126865	0.00173605	0	0	2.933	26.316	CD63;CDKN1A;SDC2;RPS6;IGF2;PLAUR;MSN;ANK2;HSPG2;MMP9;ACTB;RHOA;ACTG1;CDC42;CCND1;FLNA;CTNNB1;EIF4B
Cellular senescence	15/156	0.00016882	0.00219466	0	0	3.23391	28.0919	CDKN1A;CXCL8;IGFBP3;HLA-B;HLA-A;FOXM1;ZFP36L1;CDK6;CCND1;EIF4EBP1;CALM3;CALM1;SQSTM1;CALM2;SLC25A6
Thermogenesis	19/232	0.000207134	0.00256452	0	0	2.71867	23.0601	ND6;ATP8;RPS6;ATP6;ND4L;ACTB;UQCRH;SMARCA4;ACTG1;COX3;GNAS;COX2;COX1;ND1;CYTB;ND3;ND2;ND5;ND4
Cell adhesion molecules	14/148	0.000326289	0.00385614	0	0	3.17213	25.465	CADM3;NLGN2;CADM1;SDC2;SDC3;ITGB2;HLA-B;NRXN2;HLA-A;L1CAM;ALCAM;CDH2;CNTN1;NCAM1
Steroid biosynthesis	5/20	0.00036105	0.00408143	0	0	10.0405	79.586	SQLE;DHCR24;MSMO1;LSS;FDFT1
Shigellosis	19/246	0.000433728	0.00469872	0	0	2.54913	19.7382	ACTR2;CXCL8;ACTN1;ACTN4;FNBP1L;ACTB;RHOA;ACTG1;CDC42;UBB;ARPC2;IL1B;UBC;ARHGEF2;PFN1;RPS27A;UBA52;SQSTM1;PFN2
Legionellosis	8/57	0.000468499	0.00480235	0	0	4.9322	37.8101	EEF1A1;EEF1G;HSPA8;CXCL8;IL1B;ITGB2;EEF1A2;HSPD1
Neurotrophin signaling pathway	12/119	0.000480235	0.00480235	0	0	3.3991	25.9733	YWHAE;CDC42;NTRK2;MAGED1;SHC1;KIDINS220;ARHGDIA;CALM3;CALM1;CALM2;RHOA;ATF4
Kaposi sarcoma-associated herpesvirus infection	16/193	0.000560273	0.00539522	0	0	2.74711	20.5678	CDKN1A;CXCL8;HLA-B;HLA-A;CDK6;GNG2;CCND1;UBB;UBC;GNB1;CTNNB1;CALM3;CALM1;RPS27A;UBA52;CALM2
Viral myocarditis	8/60	0.000666417	0.00618816	0	0	4.64692	33.9857	CCND1;ITGB2;HLA-B;HLA-A;ACTB;EIF4G2;ACTG1;EIF4G1
Pertussis	9/76	0.000757155	0.00663538	0	0	4.06059	29.1792	CXCL8;IL1B;ITGB2;CFL1;CALM3;CALM1;CALM2;RHOA;GNAI2
Regulation of actin cytoskeleton	17/218	0.000765621	0.00663538	0	0	2.57114	18.4475	APC2;ACTR2;ACTN1;ITGB2;MSN;ACTN4;ACTB;RHOA;ACTG1;CDC42;ARPC2;TMSB4X;CFL1;MYH9;PIP4K2B;PFN1;PFN2
Bacterial invasion of epithelial cells	9/77	0.000833244	0.00698849	0	0	4.00067	28.3655	CDC42;ACTR2;ARPC2;SHC1;CLTC;CTNNB1;ACTB;RHOA;ACTG1
Antigen processing and presentation	9/78	0.000915435	0.00743791	0	0	3.94248	27.5821	HSPA8;HSP90AA1;HSP90AB1;HSPA5;CANX;HLA-B;HLA-A;CALR;B2M
Leukocyte transendothelial migration	11/114	0.00117666	0.0092471	0	0	3.23243	21.803	CDC42;ACTN1;ITGB2;MSN;CTNNB1;ACTN4;MMP9;ACTB;RHOA;ACTG1;GNAI2
Dopaminergic synapse	12/132	0.00120924	0.0092471	0	0	3.02882	20.3469	GNG2;KIF5C;PPP2R1A;KIF5B;KIF5A;GNB1;GNAS;CALM3;CALM1;CALM2;ATF4;GNAI2
Protein processing in endoplasmic reticulum	14/171	0.00136812	0.0101631	0	0	2.70418	17.8322	PPP1R15A;HSPA8;HSP90AA1;HSP90AB1;RPN2;HSPA5;SSR2;DNAJA1;GANAB;CANX;HYOU1;CALR;P4HB;ATF4
Oxytocin signaling pathway	13/154	0.00152129	0.0109871	0	0	2.79388	18.1272	CDKN1A;CACNA2D1;EEF2;ACTB;RHOA;ACTG1;GNAI2;MYL6;CCND1;GNAS;CALM3;CALM1;CALM2
Estrogen signaling pathway	12/137	0.00166546	0.0117032	0	0	2.90691	18.5974	HSPA8;HSP90AA1;HSP90AB1;SHC1;GNAS;CALM3;CALM1;CALM2;CTSD;MMP9;ATF4;GNAI2
Gap junction	9/88	0.00215749	0.0147618	0	0	3.44165	21.1276	TUBA1B;TUBB2B;TUBA1A;TUBB2A;TUBB3;TUBB;GNAS;TUBB4B;GNAI2
Non-small cell lung cancer	8/72	0.00222274	0.0148183	0	0	3.77328	23.051	RET;EML4;CDKN1A;CDK6;CCND1;KIF5C;KIF5B;KIF5A
Hippo signaling pathway	13/163	0.00252136	0.0163889	0	0	2.62502	15.7054	YWHAE;APC2;YWHAB;ITGB2;YWHAZ;ACTB;ACTG1;SOX2;CCND1;YWHAQ;PPP2R1A;CTNNB1;YWHAG
Vasopressin-regulated water reabsorption	6/44	0.00277594	0.0176035	0	0	4.75778	28.0079	DYNC1H1;DCTN1;ARHGDIA;GNAS;DYNLL2;VAMP2
Gastric acid secretion	8/76	0.0031296	0.0193737	0	0	3.55058	20.4757	GNAS;ATP1A3;CALM3;CALM1;CALM2;ACTB;ACTG1;GNAI2
Terpenoid backbone biosynthesis	4/22	0.00498867	0.0301641	0	0	6.68222	35.4197	HMGCS1;MVD;HMGCR;ZMPSTE24
Hepatitis C	12/157	0.0051061	0.0301724	0	0	2.50335	13.211	YWHAE;CDKN1A;CDK6;CCND1;YWHAQ;CD81;PPP2R1A;YWHAB;CTNNB1;EIF3E;YWHAZ;YWHAG
Malaria	6/50	0.00530916	0.0306752	0	0	4.10772	21.5175	CXCL8;LRP1;CD81;IL1B;SDC2;ITGB2
PI3K-Akt signaling pathway	21/354	0.00585098	0.0330707	0	0	1.91607	9.85079	YWHAE;NTRK2;CDKN1A;HSP90AA1;HSP90AB1;YWHAB;RPS6;IGF2;YWHAZ;CDK6;GNG2;CCND1;YWHAQ;PPP2R1A;GNB1;SPP1;EIF4EBP1;YWHAG;EIF4B;ATF4;MCL1
Thyroid cancer	5/37	0.00645647	0.0357166	0	0	4.70235	23.7124	RET;CDKN1A;CCND1;TPR;CTNNB1
Cardiac muscle contraction	8/87	0.00712894	0.0386151	0	0	3.05446	15.1	CACNA2D1;COX3;ATP2A2;ATP1A3;COX2;COX1;CYTB;UQCRH
Parathyroid hormone synthesis, secretion and action	9/106	0.00744976	0.0395293	0	0	2.80037	13.7206	CDKN1A;MMP14;JUND;NACA;GNAS;GATA3;RHOA;ATF4;GNAI2
Adherens junction	7/71	0.0079681	0.0414341	0	0	3.29646	15.9295	CDC42;ACTN1;CTNNB1;ACTN4;ACTB;RHOA;ACTG1
Endocytosis	16/252	0.0081797	0.0417005	0	0	2.05399	9.87168	HSPA8;ACTR2;CLTC;HLA-B;HLA-A;AP2B1;RHOA;CDC42;ACAP3;RAB31;ARPC2;KIF5C;KIF5B;KIF5A;SMAP2;AP2M1
Rap1 signaling pathway	14/210	0.0086163	0.0430815	0	0	2.1617	10.2769	ITGB2;ACTB;RHOA;GNAI2;ACTG1;CDC42;GNAS;CTNNB1;CALM3;EVL;PFN1;CALM1;CALM2;PFN2
HIF-1 signaling pathway	9/109	0.00888791	0.0436011	0	0	2.71594	12.8276	LDHB;CDKN1A;RPS6;EIF4EBP1;ENO1;TIMP1;ENO2;ALDOA;GAPDH
PPAR signaling pathway	7/74	0.00992908	0.0478067	0	0	3.14837	14.5212	FADS2;HMGCS1;SCD;FABP7;UBC;DBI;PLIN2
Lipid and atherosclerosis	14/215	0.0104671	0.0494684	0	0	2.10738	9.60862	HSPA8;HSP90AA1;CXCL8;HSP90AB1;HSPA5;MMP9;RHOA;HSPD1;CDC42;IL1B;CALM3;CALM1;CALM2;ATF4
Glioma	7/75	0.0106547	0.0494684	0	0	3.10191	14.0881	CDKN1A;CDK6;CCND1;SHC1;CALM3;CALM1;CALM2
Phototransduction	4/28	0.0119858	0.0545709	0	0	5.01011	22.1649	GNB1;CALM3;CALM1;CALM2
Type I diabetes mellitus	5/43	0.0121735	0.0545709	0	0	3.95864	17.4516	IL1B;HLA-B;CPE;HLA-A;HSPD1
Prostate cancer	8/97	0.013348	0.0588218	0	0	2.70985	11.6968	CDKN1A;HSP90AA1;HSP90AB1;CCND1;GSTP1;CTNNB1;MMP9;ATF4
RNA degradation	7/79	0.0139454	0.0604301	0	0	2.92897	12.5143	HSPA9;BTG1;CNOT1;PABPC4;ENO1;ENO2;HSPD1
Cell cycle	9/124	0.0194173	0.0827622	0	0	2.35985	9.30156	YWHAE;CDKN1A;CDK6;CCND1;YWHAQ;PRKDC;YWHAB;YWHAZ;YWHAG
Hepatocellular carcinoma	11/168	0.0209607	0.0870543	0	0	2.11469	8.1735	APC2;CDKN1A;CDK6;CCND1;SHC1;GSTP1;IGF2;CTNNB1;ACTB;ACTG1;SMARCA4
Glycolysis / Gluconeogenesis	6/67	0.0210939	0.0870543	0	0	2.96033	11.4232	LDHB;PKM;ENO1;ENO2;ALDOA;GAPDH
Retrograde endocannabinoid signaling	10/148	0.0222558	0.0887339	0	0	2.18586	8.31752	ND6;GNG2;GNB1;ND1;ND4L;ND3;ND2;ND5;ND4;GNAI2
Cysteine and methionine metabolism	5/50	0.0223086	0.0887339	0	0	3.34164	12.7075	LDHB;AHCY;MAT2A;PSAT1;BCAT1
Mitophagy	6/68	0.0225248	0.0887339	0	0	2.91244	11.0473	UBB;UBC;RPS27A;SQSTM1;UBA52;ATF4
Adrenergic signaling in cardiomyocytes	10/150	0.0241608	0.091896	0	0	2.15441	8.02091	PPP2R1A;CACNA2D1;GNAS;ATP2A2;ATP1A3;CALM3;CALM1;CALM2;ATF4;GNAI2
Spliceosome	10/150	0.0241608	0.091896	0	0	2.15441	8.02091	HSPA8;HNRNPK;FUS;HNRNPU;HNRNPC;SNRNP200;HNRNPA1;PRPF8;SF3B1;RBMX
Oocyte meiosis	9/129	0.0243878	0.091896	0	0	2.26093	8.39637	YWHAE;YWHAQ;PPP2R1A;YWHAB;CALM3;CALM1;CALM2;YWHAZ;YWHAG
Endocrine and other factor-regulated calcium reabsorption	5/53	0.027944	0.103792	0	0	3.1323	11.206	CLTC;GNAS;ATP1A3;AP2B1;AP2M1
Cushing syndrome	10/155	0.0294328	0.107782	0	0	2.07958	7.33184	APC2;CDKN1A;CDK6;CCND1;KMT2A;GNAS;CTNNB1;PBX1;ATF4;GNAI2
GnRH signaling pathway	7/93	0.0311259	0.112399	0	0	2.45038	8.50212	CDC42;MMP14;GNAS;CALM3;CALM1;CALM2;ATF4
Tuberculosis	11/180	0.0325947	0.115002	0	0	1.96331	6.72159	HSPA9;FCER1G;IL1B;ITGB2;CEBPG;CALM3;CALM1;CALM2;CTSD;RHOA;HSPD1
IL-17 signaling pathway	7/94	0.0327312	0.115002	0	0	2.42209	8.28216	HSP90AA1;CXCL8;HSP90AB1;JUND;CCL20;IL1B;MMP9
Apelin signaling pathway	9/137	0.0341216	0.116106	0	0	2.11874	7.15674	GNG2;CCND1;RPS6;GNB1;SPP1;CALM3;CALM1;CALM2;GNAI2
Necroptosis	10/159	0.0342008	0.116106	0	0	2.02333	6.82975	HSP90AA1;HSP90AB1;PARP1;FTH1;IL1B;HMGB1;PPIA;SQSTM1;FTL;SLC25A6
Thyroid hormone synthesis	6/75	0.0343852	0.116106	0	0	2.61602	8.81633	TTR;HSPA5;CANX;GNAS;ATP1A3;ATF4
Axon guidance	11/182	0.034906	0.116353	0	0	1.94014	6.50936	CDC42;DPYSL5;UNC5B;DPYSL2;CFL1;PLXNA1;UNC5C;SLIT3;L1CAM;RHOA;GNAI2
Circadian entrainment	7/97	0.0378753	0.124653	0	0	2.34099	7.66312	GNG2;GNB1;GNAS;CALM3;CALM1;CALM2;GNAI2
Arrhythmogenic right ventricular cardiomyopathy	6/77	0.0383932	0.124778	0	0	2.54207	8.28682	CDH2;CACNA2D1;ATP2A2;CTNNB1;ACTB;ACTG1
Alcoholism	11/186	0.0398702	0.127978	0	0	1.8954	6.10722	NTRK2;GNG2;SHC1;PKIA;GNB1;GNAS;CALM3;CALM1;CALM2;ATF4;GNAI2
Synaptic vesicle cycle	6/78	0.0405041	0.128428	0	0	2.50663	8.03714	STXBP1;CLTC;AP2B1;CPLX2;AP2M1;VAMP2
Apoptosis	9/142	0.0414084	0.129713	0	0	2.03856	6.49133	TUBA1B;TUBA1A;PARP1;CTSD;SPTAN1;ACTB;ACTG1;ATF4;MCL1
Bladder cancer	4/41	0.0427518	0.132327	0	0	3.24761	10.2376	CDKN1A;CXCL8;CCND1;MMP9
Amoebiasis	7/102	0.0475755	0.145525	0	0	2.2172	6.75236	CXCL8;ACTN1;PRDX1;IL1B;ITGB2;GNAS;ACTN4
Glucagon signaling pathway	7/107	0.058729	0.177553	0	0	2.1058	5.96956	LDHB;PKM;GNAS;CALM3;CALM1;CALM2;ATF4
Focal adhesion	11/201	0.0627987	0.187674	0	0	1.7444	4.82818	CDC42;CCND1;SHC1;ACTN1;SPP1;FLNA;CTNNB1;ACTN4;ACTB;RHOA;ACTG1
Non-homologous end-joining	2/13	0.0643859	0.190026	0	0	5.45229	14.9549	PRKDC;XRCC5
Non-alcoholic fatty liver disease	9/155	0.0650474	0.190026	0	0	1.85579	5.0712	CDC42;CXCL8;IL1B;COX3;COX2;COX1;CYTB;UQCRH;ATF4
Amphetamine addiction	5/69	0.0724404	0.206973	0	0	2.34728	6.16159	GNAS;CALM3;CALM1;CALM2;ATF4
Renin secretion	5/69	0.0724404	0.206973	0	0	2.34728	6.16159	GNAS;CALM3;CALM1;CALM2;GNAI2
Cocaine addiction	4/49	0.0733547	0.207307	0	0	2.66916	6.97303	GNAS;ATF4;GNAI2;CDK5R1
Central carbon metabolism in cancer	5/70	0.0760451	0.212599	0	0	2.31105	5.95425	RET;SLC7A5;LDHB;PKM;SLC1A5
Yersinia infection	8/137	0.0770434	0.213099	0	0	1.86571	4.78253	CDC42;ACTR2;CXCL8;ARPC2;IL1B;ACTB;RHOA;ACTG1
Salivary secretion	6/93	0.0809796	0.221628	0	0	2.07284	5.2102	GNAS;ATP1A3;CALM3;CALM1;CALM2;VAMP2
Human immunodeficiency virus 1 infection	11/212	0.0842078	0.228063	0	0	1.64799	4.07789	GNG2;CFL1;GNB1;HLA-B;CALM3;HLA-A;CALR;CALM1;B2M;CALM2;GNAI2
Base excision repair	3/33	0.089933	0.241058	0	0	3.00047	7.22719	PARP1;APEX1;HMGB1
cGMP-PKG signaling pathway	9/167	0.0931936	0.2462	0	0	1.71377	4.06691	ATP2A2;ATP1A3;CALM3;CALM1;CALM2;RHOA;ATF4;SLC25A6;GNAI2
Fc gamma R-mediated phagocytosis	6/97	0.0945741	0.2462	0	0	1.98131	4.67267	CDC42;ACTR2;MARCKSL1;MARCKS;ARPC2;CFL1
AMPK signaling pathway	7/120	0.0946923	0.2462	0	0	1.86228	4.38962	CCND1;PPP2R1A;SCD;FASN;EIF4EBP1;HMGCR;EEF2
Pathways in cancer	23/531	0.0966222	0.24873	0	0	1.36734	3.19539	RET;APC2;CDKN1A;HSP90AA1;HSP90AB1;CXCL8;GSTP1;IGF2;MMP9;RHOA;GNAI2;EML4;CDC42;CDK6;GNG2;CCND1;TPR;GNB1;GNAS;CTNNB1;CALM3;CALM1;CALM2
Aldosterone synthesis and secretion	6/98	0.0981527	0.250193	0	0	1.95968	4.54886	GNAS;ATP1A3;CALM3;CALM1;CALM2;ATF4
Human T-cell leukemia virus 1 infection	11/219	0.0999234	0.252234	0	0	1.59194	3.6668	CDKN1A;CCND1;CANX;ITGB2;HLA-B;HLA-A;CALR;B2M;RAN;ATF4;SLC25A6
Leishmaniasis	5/77	0.1039	0.259751	0	0	2.0856	4.72249	EEF1A1;MARCKSL1;IL1B;ITGB2;EEF1A2
Melanogenesis	6/101	0.109312	0.270677	0	0	1.8975	4.2002	GNAS;CTNNB1;CALM3;CALM1;CALM2;GNAI2
Chagas disease	6/102	0.11317	0.277588	0	0	1.87763	4.0911	CXCL8;PPP2R1A;IL1B;GNAS;CALR;GNAI2
Endometrial cancer	4/58	0.117838	0.286335	0	0	2.22326	4.75432	APC2;CDKN1A;CCND1;CTNNB1
C-type lectin receptor signaling pathway	6/104	0.121091	0.290418	0	0	1.83912	3.88278	FCER1G;IL1B;CALM3;CALM1;CALM2;RHOA
Lysosome	7/128	0.121752	0.290418	0	0	1.73843	3.66073	CD63;PSAP;CLTC;PPT1;LAPTM5;IDS;CTSD
Relaxin signaling pathway	7/129	0.125388	0.296371	0	0	1.72409	3.57981	GNG2;SHC1;GNB1;GNAS;MMP9;ATF4;GNAI2
MicroRNAs in cancer	14/310	0.132292	0.309873	0	0	1.42393	2.88024	APC2;CDKN1A;SHC1;SLC7A1;MMP9;RHOA;MARCKS;HNRNPK;CDK6;CCND1;FSCN1;VIM;SOX4;MCL1
Vascular smooth muscle contraction	7/133	0.140469	0.32609	0	0	1.66901	3.27588	MYL6;GNAS;MYH9;CALM3;CALM1;CALM2;RHOA
Colorectal cancer	5/86	0.145999	0.333421	0	0	1.85301	3.56547	APC2;CDKN1A;CCND1;CTNNB1;RHOA
Ferroptosis	3/41	0.146192	0.333421	0	0	2.36781	4.5529	FTH1;SLC3A2;FTL
Graft-versus-host disease	3/42	0.153892	0.347517	0	0	2.30698	4.31751	IL1B;HLA-B;HLA-A
Hepatitis B	8/162	0.155528	0.347517	0	0	1.5608	2.90454	CDKN1A;CXCL8;YWHAQ;YWHAB;HSPG2;MMP9;YWHAZ;ATF4
Insulin signaling pathway	7/137	0.156383	0.347517	0	0	1.61732	3.00085	SHC1;FASN;RPS6;EIF4EBP1;CALM3;CALM1;CALM2
GABAergic synapse	5/89	0.161438	0.35571	0	0	1.78655	3.25801	SLC38A1;GNG2;GNB1;SLC38A2;GNAI2
Glutamatergic synapse	6/114	0.164534	0.356713	0	0	1.66797	3.01008	SLC38A1;GNG2;GNB1;GNAS;SLC38A2;GNAI2
Measles	7/139	0.164637	0.356713	0	0	1.59265	2.87316	HSPA8;CDK6;CCND1;IL1B;RACK1;MSN;ADAR
Transcriptional misregulation in cancer	9/192	0.171074	0.365065	0	0	1.47772	2.60916	CDKN1A;MYCN;CXCL8;KMT2A;FUS;IGFBP3;MMP9;PBX1;DUSP6
Long-term potentiation	4/67	0.1713	0.365065	0	0	1.90476	3.36065	CALM3;CALM1;CALM2;ATF4
Vitamin B6 metabolism	1/6	0.179083	0.37855	0	0	5.99009	10.3024	PSAT1
Human papillomavirus infection	14/331	0.187374	0.392882	0	0	1.32813	2.22415	APC2;CDKN1A;HLA-B;CHD4;HLA-A;CDC42;CDK6;PKM;CCND1;PPP2R1A;SPP1;EIF4EBP1;GNAS;CTNNB1
Influenza A	8/172	0.194709	0.404994	0	0	1.46487	2.39689	CDK6;CXCL8;HNRNPUL1;IL1B;ADAR;ACTB;ACTG1;SLC25A6
Thyroid hormone signaling pathway	6/121	0.198344	0.409038	0	0	1.56587	2.53319	CCND1;ATP2A2;ATP1A3;CTNNB1;ACTB;ACTG1
Dilated cardiomyopathy	5/96	0.199799	0.409038	0	0	1.64852	2.65485	CACNA2D1;GNAS;ATP2A2;ACTB;ACTG1
Epstein-Barr virus infection	9/202	0.208729	0.419355	0	0	1.40043	2.19407	NCOR2;CDKN1A;CDK6;CCND1;HLA-B;HLA-A;CALR;VIM;B2M
p53 signaling pathway	4/73	0.21081	0.419355	0	0	1.73859	2.70663	CDKN1A;CDK6;CCND1;IGFBP3
Ether lipid metabolism	3/49	0.210868	0.419355	0	0	1.95521	3.04332	ENPP2;PLD3;PAFAH1B1
Inflammatory mediator regulation of TRP channels	5/98	0.21129	0.419355	0	0	1.6129	2.50729	IL1B;GNAS;CALM3;CALM1;CALM2
Platelet activation	6/124	0.213567	0.420662	0	0	1.52582	2.35557	FCER1G;GNAS;ACTB;RHOA;ACTG1;GNAI2
Biosynthesis of unsaturated fatty acids	2/27	0.216975	0.424162	0	0	2.39727	3.66297	FADS2;SCD
Vibrio cholerae infection	3/50	0.219362	0.424297	0	0	1.91351	2.90285	GNAS;ACTB;ACTG1
Ras signaling pathway	10/232	0.220308	0.424297	0	0	1.35284	2.04647	CDC42;NTRK2;GNG2;SHC1;GNB1;IGF2;CALM3;CALM1;CALM2;RHOA
Chronic myeloid leukemia	4/76	0.231452	0.439252	0	0	1.66589	2.43783	CDKN1A;CDK6;CCND1;SHC1
Pancreatic cancer	4/76	0.231452	0.439252	0	0	1.66589	2.43783	CDC42;CDKN1A;CDK6;CCND1
Chemical carcinogenesis	10/239	0.247221	0.465778	0	0	1.311	1.83209	CHRNA3;HSP90AA1;HSP90AB1;CCND1;GSTP1;EIF4EBP1;GNAS;KPNB1;ATF4;GNAI2
Natural killer cell mediated cytotoxicity	6/131	0.25053	0.468617	0	0	1.43985	1.99301	TYROBP;FCER1G;SHC1;ITGB2;HLA-B;HLA-A
Synthesis and degradation of ketone bodies	1/10	0.280301	0.52056	0	0	3.32714	4.23176	HMGCS1
Chemokine signaling pathway	8/192	0.283129	0.522083	0	0	1.30428	1.64581	CDC42;CXCL8;GNG2;SHC1;CCL20;GNB1;RHOA;GNAI2
ErbB signaling pathway	4/85	0.295827	0.535758	0	0	1.4801	1.80273	CDKN1A;NRG4;SHC1;EIF4EBP1
TNF signaling pathway	5/112	0.296562	0.535758	0	0	1.40085	1.70273	MMP14;CCL20;IL1B;MMP9;ATF4
Ubiquitin mediated proteolysis	6/140	0.300367	0.535758	0	0	1.34252	1.61471	UBB;UBC;HUWE1;UBA1;RPS27A;UBA52
Cholinergic synapse	5/113	0.302888	0.535758	0	0	1.38781	1.65759	CHRNA3;GNG2;GNB1;ATF4;GNAI2
Serotonergic synapse	5/113	0.302888	0.535758	0	0	1.38781	1.65759	APP;GNG2;GNB1;GNAS;GNAI2
Insulin secretion	4/86	0.303135	0.535758	0	0	1.46197	1.74498	GNAS;ATP1A3;VAMP2;ATF4
Long-term depression	3/60	0.30703	0.535758	0	0	1.57699	1.86212	PPP2R1A;GNAS;GNAI2
Mineral absorption	3/60	0.30703	0.535758	0	0	1.57699	1.86212	FTH1;ATP1A3;FTL
ECM-receptor interaction	4/88	0.317809	0.550868	0	0	1.42702	1.6358	SV2A;SPP1;AGRN;HSPG2
Hypertrophic cardiomyopathy	4/90	0.332537	0.568674	0	0	1.39369	1.53445	CACNA2D1;ATP2A2;ACTB;ACTG1
Basal cell carcinoma	3/63	0.33377	0.568674	0	0	1.4979	1.64366	APC2;CDKN1A;CTNNB1
Morphine addiction	4/91	0.339914	0.568674	0	0	1.37759	1.48651	GNG2;GNB1;GNAS;GNAI2
Breast cancer	6/147	0.34031	0.568674	0	0	1.2754	1.37475	APC2;CDKN1A;CDK6;CCND1;SHC1;CTNNB1
Growth hormone synthesis, secretion and action	5/119	0.341204	0.568674	0	0	1.31435	1.41329	SHC1;IGFBP3;GNAS;ATF4;GNAI2
Sphingolipid signaling pathway	5/119	0.341204	0.568674	0	0	1.31435	1.41329	FCER1G;PPP2R1A;CTSD;RHOA;GNAI2
Allograft rejection	2/38	0.349343	0.576357	0	0	1.66382	1.74985	HLA-B;HLA-A
Cortisol synthesis and secretion	3/65	0.351578	0.576357	0	0	1.44943	1.51513	GNAS;PBX1;ATF4
MAPK signaling pathway	11/294	0.354515	0.576357	0	0	1.16547	1.2086	CDC42;HSPA8;NTRK2;JUND;CACNA2D1;IL1B;IGF2;FLNA;MAPT;DUSP6;ATF4
Rheumatoid arthritis	4/93	0.354681	0.576357	0	0	1.3465	1.39569	CXCL8;CCL20;IL1B;ITGB2
Various types of N-glycan biosynthesis	2/39	0.361135	0.583199	0	0	1.61877	1.64873	RPN2;B4GALNT4
Acute myeloid leukemia	3/67	0.369331	0.592753	0	0	1.40399	1.39847	CCND1;EIF4EBP1;DUSP6
Glycine, serine and threonine metabolism	2/40	0.372846	0.594724	0	0	1.57609	1.55496	SHMT2;PSAT1
mTOR signaling pathway	6/154	0.380758	0.603641	0	0	1.21464	1.17284	SLC7A5;RPS6;EIF4EBP1;SLC3A2;RHOA;EIF4B
Phosphatidylinositol signaling system	4/97	0.384191	0.605392	0	0	1.28832	1.23242	PIP4K2B;CALM3;CALM1;CALM2
mRNA surveillance pathway	4/98	0.391549	0.613269	0	0	1.27454	1.19507	PPP2R1A;WDR82;FUS;PABPC4
Epithelial cell signaling in Helicobacter pylori infection	3/70	0.395781	0.616187	0	0	1.34092	1.24289	CDC42;CXCL8;PTPRZ1
cAMP signaling pathway	8/216	0.399355	0.618049	0	0	1.15234	1.05774	GNAS;ATP2A2;ATP1A3;CALM3;CALM1;CALM2;RHOA;GNAI2
AGE-RAGE signaling pathway in diabetic complications	4/100	0.406223	0.624958	0	0	1.24786	1.12414	CDC42;CXCL8;CCND1;IL1B
Melanoma	3/72	0.413252	0.632033	0	0	1.30192	1.1505	CDKN1A;CDK6;CCND1
Pancreatic secretion	4/102	0.420827	0.639854	0	0	1.22227	1.05791	GNAS;ATP2A2;ATP1A3;RHOA
Protein digestion and absorption	4/103	0.428097	0.647124	0	0	1.20986	1.02645	ATP1A3;SLC3A2;SLC1A5;SLC38A2
Fatty acid biosynthesis	1/18	0.446881	0.671613	0	0	1.7607	1.41818	FASN
Pyruvate metabolism	2/47	0.452031	0.675448	0	0	1.33044	1.05638	LDHB;PKM
Th17 cell differentiation	4/107	0.45692	0.678853	0	0	1.16263	0.910628	HSP90AA1;HSP90AB1;IL1B;GATA3
Valine, leucine and isoleucine degradation	2/48	0.462882	0.682743	0	0	1.30145	1.00248	HMGCS1;BCAT1
Glycosaminoglycan degradation	1/19	0.46479	0.682743	0	0	1.6628	1.27398	IDS
One carbon pool by folate	1/20	0.482121	0.703307	0	0	1.5752	1.1492	SHMT2
N-Glycan biosynthesis	2/50	0.4842	0.703307	0	0	1.24709	0.904464	GANAB;RPN2
Signaling pathways regulating pluripotency of stem cells	5/143	0.493969	0.713511	0	0	1.08442	0.76482	SOX2;APC2;ID4;CTNNB1;TBX3
Pantothenate and CoA biosynthesis	1/21	0.498891	0.716639	0	0	1.49636	1.04052	BCAT1
Arginine biosynthesis	1/22	0.515119	0.729251	0	0	1.42503	0.945307	ASS1
Autoimmune thyroid disease	2/53	0.515171	0.729251	0	0	1.17355	0.778367	HLA-B;HLA-A
Calcium signaling pathway	8/240	0.516085	0.729251	0	0	1.03184	0.682544	RET;NTRK2;GNAS;ATP2A2;CALM3;CALM1;CALM2;SLC25A6
Phospholipase D signaling pathway	5/148	0.524402	0.732273	0	0	1.04623	0.675336	CXCL8;FCER1G;SHC1;GNAS;RHOA
Gastric cancer	5/149	0.530394	0.732273	0	0	1.03891	0.658808	APC2;CDKN1A;CCND1;SHC1;CTNNB1
Protein export	1/23	0.530822	0.732273	0	0	1.36019	0.861447	HSPA5
Proximal tubule bicarbonate reclamation	1/23	0.530822	0.732273	0	0	1.36019	0.861447	ATP1A3
NOD-like receptor signaling pathway	6/181	0.533753	0.732273	0	0	1.02579	0.644013	YWHAE;HSP90AA1;CXCL8;HSP90AB1;IL1B;RHOA
Regulation of lipolysis in adipocytes	2/55	0.535123	0.732273	0	0	1.12915	0.706012	GNAS;GNAI2
Glutathione metabolism	2/57	0.554503	0.754821	0	0	1.08798	0.641561	GSTP1;PRDX6
Bile secretion	3/90	0.560615	0.755376	0	0	1.03159	0.597004	GNAS;ATP1A3;HMGCR
alpha-Linolenic acid metabolism	1/25	0.560721	0.755376	0	0	1.24671	0.721261	FADS2
Small cell lung cancer	3/92	0.575583	0.7714	0	0	1.0083	0.556959	CDKN1A;CDK6;CCND1
Fatty acid elongation	1/27	0.588718	0.780729	0	0	1.15069	0.609645	PPT1
TGF-beta signaling pathway	3/94	0.590228	0.780729	0	0	0.986042	0.519887	PPP2R1A;ID4;RHOA
Osteoclast differentiation	4/127	0.591552	0.780729	0	0	0.972575	0.510607	TYROBP;JUND;IL1B;SQSTM1
Butanoate metabolism	1/28	0.602041	0.790559	0	0	1.10802	0.56224	HMGCS1
Cytosolic DNA-sensing pathway	2/63	0.609154	0.7919	0	0	0.980658	0.486097	IL1B;ADAR
Lysine degradation	2/63	0.609154	0.7919	0	0	0.980658	0.486097	KMT2A;NSD1
Inflammatory bowel disease	2/65	0.626199	0.799637	0	0	0.949428	0.444414	IL1B;GATA3
Citrate cycle (TCA cycle)	1/30	0.627408	0.799637	0	0	1.03149	0.48084	ACLY
Glyoxylate and dicarboxylate metabolism	1/30	0.627408	0.799637	0	0	1.03149	0.48084	SHMT2
Pentose phosphate pathway	1/30	0.627408	0.799637	0	0	1.03149	0.48084	ALDOA
Progesterone-mediated oocyte maturation	3/100	0.632166	0.801772	0	0	0.924761	0.424098	HSP90AA1;HSP90AB1;GNAI2
Asthma	1/31	0.639479	0.80711	0	0	0.997059	0.445786	FCER1G
Longevity regulating pathway	3/102	0.645466	0.81073	0	0	0.905985	0.396625	HSPA8;EIF4EBP1;ATF4
NF-kappa B signaling pathway	3/104	0.658422	0.812455	0	0	0.887953	0.371084	CXCL8;PARP1;IL1B
Toll-like receptor signaling pathway	3/104	0.658422	0.812455	0	0	0.887953	0.371084	CXCL8;IL1B;SPP1
Renal cell carcinoma	2/69	0.658549	0.812455	0	0	0.89256	0.372837	CDC42;CDKN1A
Fructose and mannose metabolism	1/33	0.662463	0.812455	0	0	0.934646	0.384878	ALDOA
SNARE interactions in vesicular transport	1/33	0.662463	0.812455	0	0	0.934646	0.384878	VAMP2
Prolactin signaling pathway	2/70	0.666277	0.813296	0	0	0.879389	0.357075	CCND1;SHC1
Propanoate metabolism	1/34	0.6734	0.81815	0	0	0.906276	0.358355	LDHB
Ribosome biogenesis in eukaryotes	3/108	0.6833	0.823314	0	0	0.853949	0.325202	SNORD3A;RAN;RMRP
Nicotinate and nicotinamide metabolism	1/35	0.683984	0.823314	0	0	0.879576	0.334081	NMNAT2
Starch and sucrose metabolism	1/36	0.694225	0.83179	0	0	0.854401	0.311822	PGM2L1
African trypanosomiasis	1/37	0.704134	0.832159	0	0	0.830624	0.291371	IL1B
Alanine, aspartate and glutamate metabolism	1/37	0.704134	0.832159	0	0	0.830624	0.291371	ASS1
Aldosterone-regulated sodium reabsorption	1/37	0.704134	0.832159	0	0	0.830624	0.291371	ATP1A3
Neutrophil extracellular trap formation	5/189	0.735689	0.865517	0	0	0.811366	0.249046	ITGB2;HMGB1;ACTB;ACTG1;SLC25A6
Complement and coagulation cascades	2/85	0.765913	0.897015	0	0	0.719903	0.191989	ITGB2;PLAUR
Type II diabetes mellitus	1/46	0.780066	0.909495	0	0	0.66419	0.164969	PKM
Carbohydrate digestion and absorption	1/47	0.787198	0.911714	0	0	0.649717	0.155462	ATP1A3
Wnt signaling pathway	4/166	0.788983	0.911714	0	0	0.736939	0.174662	APC2;CCND1;CTNNB1;RHOA
FoxO signaling pathway	3/131	0.800412	0.916512	0	0	0.699668	0.155766	CDKN1A;CCND1;FOXG1
Sphingolipid metabolism	1/49	0.800775	0.916512	0	0	0.622581	0.138322	PSAP
Arginine and proline metabolism	1/50	0.807236	0.916512	0	0	0.609844	0.130592	CKB
Cholesterol metabolism	1/50	0.807236	0.916512	0	0	0.609844	0.130592	LRP1
Ovarian steroidogenesis	1/51	0.813487	0.919594	0	0	0.597616	0.123363	GNAS
Autophagy	3/137	0.82423	0.927705	0	0	0.668131	0.129153	HMGB1;SQSTM1;CTSD
Hematopoietic cell lineage	2/99	0.834528	0.935246	0	0	0.615552	0.111347	IL1B;CD24
Viral protein interaction with cytokine and cytokine receptor	2/100	0.838657	0.935373	0	0	0.609239	0.107197	CXCL8;CCL20
Hedgehog signaling pathway	1/56	0.841836	0.935373	0	0	0.543147	0.0935137	CCND1
T cell receptor signaling pathway	2/104	0.854259	0.939878	0	0	0.585226	0.0921854	CDC42;RHOA
Notch signaling pathway	1/59	0.856735	0.939878	0	0	0.514973	0.0796283	NCOR2
VEGF signaling pathway	1/59	0.856735	0.939878	0	0	0.514973	0.0796283	CDC42
GnRH secretion	1/64	0.878519	0.958848	0	0	0.473979	0.0613888	SPP1
Toxoplasmosis	2/112	0.881403	0.958848	0	0	0.542438	0.0684776	HSPA8;GNAI2
Fc epsilon RI signaling pathway	1/68	0.893538	0.967305	0	0	0.445589	0.0501582	FCER1G
JAK-STAT signaling pathway	3/162	0.898984	0.967305	0	0	0.562346	0.0598844	CDKN1A;CCND1;MCL1
RIG-I-like receptor signaling pathway	1/70	0.900338	0.967305	0	0	0.432629	0.0454196	CXCL8
Inositol phosphate metabolism	1/73	0.909733	0.973377	0	0	0.414538	0.0392172	PIP4K2B
Metabolism of xenobiotics by cytochrome P450	1/76	0.918243	0.978456	0	0	0.397895	0.0339377	GSTP1
B cell receptor signaling pathway	1/81	0.930684	0.984782	0	0	0.37293	0.0267896	CD81
Peroxisome	1/82	0.932935	0.984782	0	0	0.368306	0.0255676	PRDX1
Systemic lupus erythematosus	2/135	0.935543	0.984782	0	0	0.448097	0.0298557	ACTN1;ACTN4
PD-L1 expression and PD-1 checkpoint pathway in cancer	1/89	0.946778	0.986776	0	0	0.338886	0.0185339	EML4
Spinocerebellar ataxia	2/143	0.948125	0.986776	0	0	0.422497	0.0225059	ATP2A2;SLC25A6
Th1 and Th2 cell differentiation	1/92	0.9518	0.986776	0	0	0.327663	0.0161868	GATA3
Staphylococcus aureus infection	1/95	0.956348	0.986776	0	0	0.317156	0.0141558	ITGB2
Choline metabolism in cancer	1/98	0.960468	0.986776	0	0	0.307299	0.0123949	EIF4EBP1
Glycerophospholipid metabolism	1/98	0.960468	0.986776	0	0	0.307299	0.0123949	PLD3
Cytokine-cytokine receptor interaction	5/295	0.96401	0.986776	0	0	0.511951	0.0187651	IL1RN;CXCL8;CCL20;GDF15;IL1B
Drug metabolism	1/108	0.971595	0.986776	0	0	0.278435	0.00802348	GSTP1
Insulin resistance	1/108	0.971595	0.986776	0	0	0.278435	0.00802348	TRIB3
Purine metabolism	1/129	0.985819	0.997327	0	0	0.2325	0.0033207	PKM
Herpes simplex virus 1 infection	6/498	0.998984	0.999842	0	0	0.358833	0.000364639	IL1B;EIF4EBP1;HLA-B;HLA-A;CALR;B2M
Olfactory transduction	4/440	0.999691	0.999842	0	0	0.269907	8.33062e-05	GNB1;CALM3;CALM1;CALM2
Neuroactive ligand-receptor interaction	2/341	0.999842	0.999842	0	0	0.173918	2.74022e-05	CHRNA3;GAL

## Sheet: Jensen DISEASES
Term	Overlap	P-value	Adjusted P-value	Old P-value	Old Adjusted P-value	Odds Ratio	Combined Score	Genes
Diamond-Blackfan anemia	8/15	6.04883e-09	4.31886e-06	0	0	34.6005	654.759	RPL5;RPS7;RPS19;RPL11;RPL35A;RPL26;RPL15;RPS24
Neurodegenerative disease	27/293	1.13884e-06	0.000406566	0	0	3.12484	42.765	APP;GRN;DCTN1;ATN1;HSPD1;UCHL1;CHCHD2;TRIM2;KIF5A;KIF1B;KIF1A;HNRNPA1;CTSD;YARS;DYNC1H1;FUS;APLP1;EEF2;PPT1;GARS;MATR3;UBA1;MAPT;PFN1;SQSTM1;FTL;EIF4G1
Spondylolysis	5/8	1.80178e-06	0.000428825	0	0	50.2336	664.427	PGRMC1;RPL32;FUS;RPL34;FTH1
Progressive supranuclear palsy	7/24	7.68395e-06	0.00137159	0	0	12.4404	146.503	GRN;UBB;YWHAQ;FUS;DCTN1;UBA52;HIST1H1C
Ganglioglioma	5/12	2.28717e-05	0.00326609	0	0	21.5243	230	MAP2;H3F3A;SYP;ENO2;QKI
Frontotemporal dementia	8/39	2.90875e-05	0.00341497	0	0	7.80332	81.5073	GRN;YWHAQ;DCTN1;FUS;MATR3;HNRNPA1;INA;SQSTM1
Pick's disease	5/13	3.61776e-05	0.00341497	0	0	18.8327	192.604	GRN;UBB;YWHAQ;FUS;MAPT
Immune system cancer	15/137	3.8263e-05	0.00341497	0	0	3.74125	38.0523	DYNC1H1;BTG1;LRP1;ANK2;GATA2;CELSR2;SMARCA4;CCND1;NSD1;HIST1H1E;CTNNB1;B2M;SF3B1;SPTBN1;HIST1H1C
Cerebrovascular disease	20/225	4.58928e-05	0.00342269	0	0	2.97942	29.762	NTRK2;PARP1;RPSA;SYP;HMGCR;EPRS;ENO2;MMP9;RHOA;RTN4;GAP43;TTR;MAP2;IL1B;DCX;CALM3;MAPT;CALM1;CALM2;NES
Periventricular nodular heterotopia	7/31	4.79368e-05	0.00342269	0	0	8.80879	87.6089	DYNC1H1;TUBB2B;TUBA1A;KIF5C;DCX;FLNA;PAFAH1B1
Toxic encephalopathy	14/126	5.8534e-05	0.00379939	0	0	3.79957	37.0302	APP;NTRK2;HSPA5;PARP1;SYP;GAP43;MAP2;IL1B;CALM3;NEFM;MAPT;CALM1;CALM2;GAPDH
Intellectual disability	22/296	0.00027194	0.0161804	0	0	2.45102	20.1227	DYNC1H1;STXBP1;FOXG1;NONO;HUWE1;SOX11;SYP;L1CAM;ACTB;SMARCA4;ACTG1;CDC42;HNRNPK;PPP2R1A;EEF1A2;GNB1;CTNNB1;TCF4;KIF1A;ADNP;SPTAN1;RBMX
Melanotic neuroectodermal tumor	3/5	0.000320951	0.0176276	0	0	45.0722	362.571	RPLP1;SYP;ENO2
Lymphoid leukemia	14/152	0.000428578	0.0207772	0	0	3.07954	23.8819	DYNC1H1;BTG1;LRP1;RPLP1;CELSR2;SMARCA4;CENPF;CCND1;HIST1H1E;CTNNB1;B2M;SF3B1;SPTBN1;HIST1H1C
Spondylolisthesis	4/12	0.000436496	0.0207772	0	0	15.0428	116.382	RPL34;FTH1;IDS;PRRC2A
Dementia	12/119	0.000480235	0.0214305	0	0	3.3991	25.9733	APP;GRN;TYROBP;TTR;YWHAQ;MAP2;FUS;IL1B;SNCG;SYP;MAPT;ENO2
Sporotrichosis	3/6	0.00062645	0.0248492	0	0	30.0466	221.607	CALM3;CALM1;CALM2
Invasive aspergillosis	3/6	0.00062645	0.0248492	0	0	30.0466	221.607	MSMO1;CALM1;CALM2
inclusion-cell disease	4/14	0.000838273	0.0315014	0	0	12.033	85.2436	MGEA5;PSAP;BSG;CTSD
Multiple endocrine neoplasia type 1	5/25	0.00108234	0.0361549	0	0	7.52843	51.4088	RET;CHGA;JUND;GNAS;SF1
Arthritis	15/186	0.00109181	0.0361549	0	0	2.66239	18.1573	IL1RN;CCL20;HLA-B;HLA-A;HMGB1;HSPG2;MMP9;HSPD1;MMP14;RPS19;IL1B;SPP1;CHI3L1;TIMP1;B2M
Bowen-Conradi syndrome	4/15	0.00111402	0.0361549	0	0	10.9385	74.3794	RSL1D1;RPS19;RPS18;NSD1
Endometrial cancer	20/292	0.00139044	0.043164	0	0	2.23766	14.7197	DYNC1H1;AHNAK;LRP1;PRKDC;HUWE1;PRRC2C;ANK2;CHD4;MKI67;CELSR2;PRPF8;SFPQ;CCND1;PPP2R1A;CSDE1;NSD1;KIF5A;FLNA;CTNNB1;KIF1A
Paraplegia	8/73	0.00242713	0.0698637	0	0	3.71504	22.3684	DYNC1H1;KIF5C;DCTN1;RPL34;KIF5A;KIF1A;L1CAM;HSPD1
Nasopharynx carcinoma	3/9	0.00244621	0.0698637	0	0	15.021	90.3243	HLA-A;WLS;IER3
Muckle-Wells syndrome	3/10	0.00341101	0.0936715	0	0	12.8744	73.1365	IL1RN;IL1B;ATN1
Liver cancer	32/597	0.00381759	0.100954	0	0	1.73024	9.63423	PTPRS;AHNAK;LRP1;CLTC;NRXN2;MKI67;CELSR2;MAP2;TPR;TNRC18;KIF1B;NCAM1;KIF1A;SF3B1;SPTBN1;NTRK2;DYNC1H1;PRRC2C;UNC5C;ANK2;PROX1;HSPG2;SMARCA4;NCOR2;CNOT1;MAP1B;FASN;CNTN1;GNAS;CTNNB1;NES;SCG2
Mevalonic aciduria	3/11	0.00457816	0.112717	0	0	11.2646	60.6761	IL1RN;IL1B;DHCR24
Clostridium difficile colitis	3/11	0.00457816	0.112717	0	0	11.2646	60.6761	CDC42;RHOA;CLASP2
Brain ischemia	5/35	0.00506953	0.120655	0	0	5.01636	26.509	MAP2;IL1B;DCX;MMP9;NES
Spinal stenosis	3/12	0.00595872	0.137243	0	0	10.0124	51.2926	RPL34;FTH1;IDS
Fatty liver disease	8/85	0.0062084	0.138525	0	0	3.13412	15.9271	HSPA5;SCD;NCAN;IL1B;FASN;PLIN2;HMGCR;SREBF2
Pseudoachondroplasia	3/13	0.00756201	0.163614	0	0	9.01071	44.0139	CALM3;CALM1;CALM2
Wiskott-Aldrich syndrome	4/25	0.00799166	0.167825	0	0	5.72673	27.6564	CDC42;ACTR2;CFL1;FNBP1L
Mobius syndrome	2/5	0.00979154	0.178303	0	0	20	92.5247	CCT3;PHOX2A
Adrenal gland cancer	2/5	0.00979154	0.178303	0	0	20	92.5247	RET;GNAS
Dowling-Degos disease	2/5	0.00979154	0.178303	0	0	20	92.5247	ATP2A2;ADAR
Echolalia	2/5	0.00979154	0.178303	0	0	20	92.5247	GRN;LGALS1
pseudo-Hurler polydystrophy	2/5	0.00979154	0.178303	0	0	20	92.5247	BSG;CTSD
Skin disease	5/41	0.00998895	0.178303	0	0	4.179	19.2496	UCHL1;FLNA;NCAM1;HLA-A;MMP9
Amyloidosis	4/27	0.0105376	0.183509	0	0	5.22821	23.803	APP;TTR;TGFBI;B2M
Mixed connective tissue disease	3/15	0.0114662	0.189682	0	0	7.50815	33.5491	HMGN2;HSPG2;RPL7
Long QT syndrome	3/15	0.0114662	0.189682	0	0	7.50815	33.5491	ANK2;CALM3;CALM1
Malignant hyperthermia	4/28	0.0119858	0.189682	0	0	5.01011	22.1649	CACNA2D1;CALM3;CALM1;CALM2
Multiple sclerosis	14/219	0.0121608	0.189682	0	0	2.06583	9.10934	RPL5;BRD2;NDFIP1;HLA-B;HLA-A;PRRC2A;ZFP36L1;BAG6;ZMIZ1;TRIM2;KIF1B;KPNB1;YWHAG;IER3
Brain disease	7/77	0.0122204	0.189682	0	0	3.01297	13.2711	APP;MAP2;IL1B;SYP;MAPT;ENO2;RTN4
Gastrointestinal system disease	3/16	0.0137782	0.205262	0	0	6.93024	29.6938	NDRG4;ZMIZ1;TCF4
Otitis externa	2/6	0.0143741	0.205262	0	0	14.9992	63.6316	CALM1;CALM2
Paraganglioma	2/6	0.0143741	0.205262	0	0	14.9992	63.6316	RET;KIF1B
Chancroid	2/6	0.0143741	0.205262	0	0	14.9992	63.6316	PRDX6;HSPD1
Hemangioma	4/30	0.0152502	0.213503	0	0	4.62424	19.3439	RET;CHGA;SYP;ENO2
Large intestine cancer	9/122	0.0176508	0.223219	0	0	2.40186	9.69626	RPS9;LRP1;PTPRZ1;CTNNB1;ANK2;KIF1B;HSPG2;PRPF8;SMARCA4
Miller-Dieker lissencephaly syndrome	3/18	0.01914	0.223219	0	0	6.00559	23.758	YWHAE;TUBA1A;PAFAH1B1
Eye and adnexa disease	3/18	0.01914	0.223219	0	0	6.00559	23.758	USP11;MYH9;DLK1
Thyroid cancer	3/18	0.01914	0.223219	0	0	6.00559	23.758	RET;GNAS;CTNNB1
Motor peripheral neuropathy	2/7	0.0196958	0.223219	0	0	11.9988	47.1233	NDRG4;MYCN
Myocardial infarction	2/7	0.0196958	0.223219	0	0	11.9988	47.1233	CELSR2;SMARCA4
Neurogenic bowel	2/7	0.0196958	0.223219	0	0	11.9988	47.1233	KIDINS220;RPL34
Onchocerciasis	2/7	0.0196958	0.223219	0	0	11.9988	47.1233	ONECUT3;CALR
Goldberg-Shprintzen syndrome	2/7	0.0196958	0.223219	0	0	11.9988	47.1233	STMN2;KIF1A
Yaws	2/7	0.0196958	0.223219	0	0	11.9988	47.1233	TPR;MYH9
Hypervitaminosis A	2/7	0.0196958	0.223219	0	0	11.9988	47.1233	TTR;RPL22
Inclusion conjunctivitis	2/7	0.0196958	0.223219	0	0	11.9988	47.1233	TMBIM6;PLD3
Pelizaeus-Merzbacher disease	3/19	0.0221936	0.240094	0	0	5.62995	21.4386	GPM6A;L1CAM;GPM6B
Pertussis	3/19	0.0221936	0.240094	0	0	5.62995	21.4386	PARP1;CALM3;CALM2
Spinal muscular atrophy	3/19	0.0221936	0.240094	0	0	5.62995	21.4386	KHDRBS1;HNRNPA1;PFN2
Kidney cancer	101/2584	0.0240563	0.241483	0	0	1.2568	4.68455	CLSTN1;HDLBP;EPRS;MKI67;CELSR2;IPO9;CDH2;CCND1;PPP2R1A;KIF5B;ENPP2;UBAP2L;B2M;CHGB;SRRM2;UNC5B;CACNA2D1;ACTN1;APLP1;UNC5C;ANK2;EBF3;HSPG2;ILF3;HNRNPUL1;MAP1B;ADNP;SNRNP200;SF1;RTN1;PRKDC;MAGED1;TARS;PRPF8;RTN4;MAP2;TPR;G3BP2;TNRC18;SPTBN1;CADM1;XRCC5;LRBA;PRRC2C;MYO5A;L1CAM;PRRC2B;QKI;PRRC2A;SMARCA4;CNOT1;HNRNPF;FASN;CAPRIN1;CNTN1;GNAS;CPE;HYOU1;NES;EIF4G2;EIF4G1;RET;PTPRS;CLTC;CHD4;ADAR;CHD3;NEF…
Charcot-Marie-Tooth disease	5/51	0.0240969	0.241483	0	0	3.26883	12.1786	YARS;DYNC1H1;TRIM2;KIF1B;GARS
Neuropathy	7/89	0.0252348	0.241483	0	0	2.57045	9.45803	YARS;DYNC1H1;TTR;TRIM2;KIF1B;GARS;KIF1A
Aphasia	3/20	0.0254964	0.241483	0	0	5.2985	19.4414	GRN;MAPT;L1CAM
Behcet's disease	3/20	0.0254964	0.241483	0	0	5.2985	19.4414	HLA-B;HLA-A;HSPD1
Portal hypertension	3/20	0.0254964	0.241483	0	0	5.2985	19.4414	PCSK1N;MSN;EVL
Periodontitis	4/35	0.025686	0.241483	0	0	3.87739	14.1983	IL1RN;IL1B;MMP9;HSPD1
Adenoma	2/8	0.0257041	0.241483	0	0	9.99845	36.6054	GNAS;CTNNB1
Sertoli cell tumor	2/8	0.0257041	0.241483	0	0	9.99845	36.6054	SYP;ENO2
Small intestine cancer	2/8	0.0257041	0.241483	0	0	9.99845	36.6054	GNAS;CTNNB1
Syphilis	3/21	0.0290479	0.262535	0	0	5.00388	17.7078	TTC3;TPR;MYH9
Hypoparathyroidism	3/21	0.0290479	0.262535	0	0	5.00388	17.7078	RET;GNAS;GATA3
Lissencephaly	3/21	0.0290479	0.262535	0	0	5.00388	17.7078	TUBA1A;DCX;PAFAH1B1
Parathyroid adenoma	2/9	0.0323493	0.272705	0	0	8.56966	29.4039	RET;CCND1
Common variable immunodeficiency	2/9	0.0323493	0.272705	0	0	8.56966	29.4039	CD81;LRBA
SAPHO syndrome	2/9	0.0323493	0.272705	0	0	8.56966	29.4039	IL1RN;KIF21B
Subependymal giant cell astrocytoma	2/9	0.0323493	0.272705	0	0	8.56966	29.4039	SYP;ENO2
Herpes zoster	2/9	0.0323493	0.272705	0	0	8.56966	29.4039	IARS;RPS24
Cataract	6/74	0.0324867	0.272705	0	0	2.65463	9.09721	LONP1;MYH9;MSMO1;VIM;LSS;FTL
Ureteral disease	3/22	0.0328468	0.272705	0	0	4.74027	16.1923	SPP1;S100A4;TIMP1
Hyperparathyroidism	4/38	0.0335864	0.27564	0	0	3.53472	11.9955	RET;CHGA;CCND1;B2M
Cancer	16/300	0.0355378	0.288341	0	0	1.70255	5.68168	RET;NPM1;SET;BTG1;FUS;PBX1;RHOA;MLLT11;MYCN;CCND1;RUFY3;NSD1;TPR;GNAS;WHSC1;RBMX
Silver-Russell syndrome	4/40	0.0395554	0.294405	0	0	3.338	10.7819	MEG3;IGFBP3;IGF2;DLK1
Bone cancer	2/10	0.0395838	0.294405	0	0	7.49806	24.2138	GNAS;CTNNB1
Congenital fibrosis of the extraocular muscles	2/10	0.0395838	0.294405	0	0	7.49806	24.2138	KIF21B;PHOX2A
Right bundle branch block	2/10	0.0395838	0.294405	0	0	7.49806	24.2138	SV2A;CHD4
Smith-Lemli-Opitz syndrome	2/10	0.0395838	0.294405	0	0	7.49806	24.2138	DHCR24;MSMO1
Stevens-Johnson syndrome	2/10	0.0395838	0.294405	0	0	7.49806	24.2138	HLA-B;HSPG2
Feingold syndrome	2/10	0.0395838	0.294405	0	0	7.49806	24.2138	MYCNOS;MYCN
Irregular astigmatism	2/10	0.0395838	0.294405	0	0	7.49806	24.2138	RPS27;RPS18
Tetanus	5/60	0.0443602	0.319029	0	0	2.73265	8.51334	CALM3;CALM1;CALM2;VAMP2;EIF4G2
Essential tremor	3/25	0.0457025	0.319029	0	0	4.09324	12.6301	CHCHD2;FUS;VIM
Myelomeningocele	2/11	0.0473629	0.319029	0	0	6.6646	20.3265	MARCKSL1;RPL34
Amyotrophic neuralgia	2/11	0.0473629	0.319029	0	0	6.6646	20.3265	SEPT11;KIF1B
Short QT syndrome	2/11	0.0473629	0.319029	0	0	6.6646	20.3265	CACNA2D1;RPS5
Spondylosis	2/11	0.0473629	0.319029	0	0	6.6646	20.3265	RPL34;RPL24
Wernicke encephalopathy	2/11	0.0473629	0.319029	0	0	6.6646	20.3265	CPLX2;INA
Hirschsprung's disease	2/11	0.0473629	0.319029	0	0	6.6646	20.3265	RET;L1CAM
Intestinal benign neoplasm	2/11	0.0473629	0.319029	0	0	6.6646	20.3265	CCND1;CTNNB1
MASA syndrome	2/11	0.0473629	0.319029	0	0	6.6646	20.3265	MEG3;L1CAM
Bipolar disorder	8/124	0.0483344	0.32253	0	0	2.0762	6.29007	GPM6A;CDH2;ZMIZ1;NCAN;HLA-B;CNTN1;HLA-A;HNRNPC
Liver disease	3/26	0.0504627	0.333615	0	0	3.91507	11.6924	CDH2;CACNA2D1;FDFT1
Meningitis	4/44	0.0531869	0.342497	0	0	3.00358	8.81232	CADM1;IL1B;ENO2;MMP9
Brucellosis	3/27	0.0554534	0.342497	0	0	3.75175	10.8509	RPL9;HSPD1;RPL7
Hyperhomocysteinemia	3/27	0.0554534	0.342497	0	0	3.75175	10.8509	AHCY;HSPA5;MMP9
Migraine	2/12	0.0556437	0.342497	0	0	5.99783	17.3264	LRP1;INA
Neuronal ceroid lipofuscinosis	2/12	0.0556437	0.342497	0	0	5.99783	17.3264	PPT1;CTSD
Autoimmune thrombocytopenic purpura	2/12	0.0556437	0.342497	0	0	5.99783	17.3264	FOXG1;MYH9
Sotos syndrome	2/12	0.0556437	0.342497	0	0	5.99783	17.3264	NSD1;WHSC1
Hypermethioninemia	2/12	0.0556437	0.342497	0	0	5.99783	17.3264	AHCY;MAT2A
Osteoporosis	8/130	0.0605467	0.367102	0	0	1.97347	5.53429	CDH2;CADM1;CTNNB1;MAPT;SCG2;SPTBN1;WLS;RPS12
Personality disorder	3/28	0.0606695	0.367102	0	0	3.60149	10.0925	FLNA;GATA3;RTN4
Mucoepidermoid carcinoma	2/13	0.0643859	0.370738	0	0	5.45229	14.9549	SLC25A3;NUDT3
Neurogenic bladder	2/13	0.0643859	0.370738	0	0	5.45229	14.9549	KIDINS220;RPS24
Babesiosis	2/13	0.0643859	0.370738	0	0	5.45229	14.9549	RPS8;CCT7
Chorioamnionitis	2/13	0.0643859	0.370738	0	0	5.45229	14.9549	IL1B;TRIM67
Theileriasis	2/13	0.0643859	0.370738	0	0	5.45229	14.9549	RPS8;RPS12
Gingivitis	2/13	0.0643859	0.370738	0	0	5.45229	14.9549	IL1B;SMARCA4
Polyneuropathy	3/29	0.0661057	0.377596	0	0	3.46279	9.40668	TTR;CNTN1;KIF1B
Ataxia telangiectasia	3/30	0.0717563	0.397843	0	0	3.33437	8.78433	CDKN1A;PRKDC;XRCC5
Hemochromatosis	3/30	0.0717563	0.397843	0	0	3.33437	8.78433	HLA-A;B2M;FTL
Hereditary spastic paraplegia	4/49	0.0733547	0.397843	0	0	2.66916	6.97303	KIF5A;KIF1A;L1CAM;HSPD1
Multiple endocrine neoplasia type 2B	2/14	0.0735509	0.397843	0	0	4.99767	13.0428	RET;SHC1
Biliary tract cancer	2/14	0.0735509	0.397843	0	0	4.99767	13.0428	GNAS;CTNNB1
Scrapie	2/14	0.0735509	0.397843	0	0	4.99767	13.0428	RPSA;SNORD3A
Stomach cancer	2/14	0.0735509	0.397843	0	0	4.99767	13.0428	GNAS;CTNNB1
Pituitary adenoma	3/31	0.0776153	0.416672	0	0	3.21512	8.21781	CHGA;GNAS;SYP
Rheumatoid arthritis	15/310	0.0798995	0.425733	0	0	1.53331	3.87465	BRD2;RBFOX2;RPLP1;CELF2;HLA-B;UNC5C;HLA-A;SLC7A1;PRRC2A;BAG6;FADS2;CDK6;RPS18;KIF5A;IER3
Ovarian cancer	4/51	0.0823634	0.426749	0	0	2.55531	6.37962	AHNAK;PPP2R1A;GNAS;CTNNB1
Aicardi syndrome	2/15	0.0831024	0.426749	0	0	4.613	11.4757	FLNA;GPM6B
Spindle cell hemangioma	2/15	0.0831024	0.426749	0	0	4.613	11.4757	ATP5G3;ATP5G2
Gangliosidosis	2/15	0.0831024	0.426749	0	0	4.613	11.4757	MGEA5;PSAP
Peritonitis	3/32	0.0836764	0.426749	0	0	3.10409	7.70062	IL1B;HMGB1;B2M
Chagas disease	3/32	0.0836764	0.426749	0	0	3.10409	7.70062	CALR;WLS;FDFT1
Arthropathy	3/33	0.089933	0.452198	0	0	3.00047	7.22719	IL1RN;IL1B;B2M
Degenerative disc disease	3/33	0.089933	0.452198	0	0	3.00047	7.22719	FTH1;IL1B;TIMP1
Lung disease	7/119	0.0915694	0.457207	0	0	1.879	4.49206	IL1RN;IL1B;CHI3L1;HMGB1;TIMP1;B2M;RHOA
Pathological gambling	2/16	0.0930059	0.461154	0	0	4.28328	10.1732	SRGN;RTN4
Urticaria	3/34	0.0963785	0.474581	0	0	2.90353	6.79272	CD63;IL1RN;TPT1
Axonal neuropathy	2/17	0.103229	0.478605	0	0	3.99752	9.0776	TRIM2;KIF1A
Basal ganglia calcification	2/17	0.103229	0.478605	0	0	3.99752	9.0776	YARS;XPR1
Papilloma	2/17	0.103229	0.478605	0	0	3.99752	9.0776	CCND1;SYP
Coffin-Siris syndrome	2/17	0.103229	0.478605	0	0	3.99752	9.0776	SOX11;SMARCA4
Colorectal cancer	2/17	0.103229	0.478605	0	0	3.99752	9.0776	NDRG4;UNC5C
Takayasu's arteritis	2/17	0.103229	0.478605	0	0	3.99752	9.0776	RPS9;HLA-B
Testicular cancer	2/17	0.103229	0.478605	0	0	3.99752	9.0776	SPRY4;CTNNB1
Generalized anxiety disorder	2/17	0.103229	0.478605	0	0	3.99752	9.0776	SRGN;DYNLL2
Insulinoma	2/17	0.103229	0.478605	0	0	3.99752	9.0776	RPS15;CPE
Exanthem	3/36	0.109808	0.497737	0	0	2.72727	6.0246	IL1RN;IL1B;HSPG2
Uveitis	3/36	0.109808	0.497737	0	0	2.72727	6.0246	IL1RN;HLA-B;HLA-A
Leukopenia	3/36	0.109808	0.497737	0	0	2.72727	6.0246	IL1B;NCAM1;B2M
Cystinuria	2/18	0.11374	0.497737	0	0	3.74748	8.14643	SLC7A5;SLC3A2
Endocarditis	2/18	0.11374	0.497737	0	0	3.74748	8.14643	ISLR2;HSPD1
Kallmann syndrome	2/18	0.11374	0.497737	0	0	3.74748	8.14643	SPRY4;DUSP6
Lymphatic system disease	2/18	0.11374	0.497737	0	0	3.74748	8.14643	IL1B;B2M
Idiopathic scoliosis	3/37	0.116778	0.497737	0	0	2.64692	5.6842	CALM3;CALM1;CALM2
Sensorineural hearing loss	6/103	0.117097	0.497737	0	0	1.85818	3.98533	IL1RN;RPS19;MYH9;ATP1A3;GATA3;ACTG1
Metachromatic leukodystrophy	1/4	0.123264	0.497737	0	0	9.98452	20.9019	PSAP
Pelvic inflammatory disease	2/19	0.12451	0.497737	0	0	3.52686	7.34775	MAPT;HSPD1
Carpal tunnel syndrome	2/19	0.12451	0.497737	0	0	3.52686	7.34775	TTR;B2M
Chlamydia	2/19	0.12451	0.497737	0	0	3.52686	7.34775	IL1B;HSPD1
Legionnaires' disease	2/19	0.12451	0.497737	0	0	3.52686	7.34775	ANK2;RAN
Muscular atrophy	4/61	0.134766	0.497737	0	0	2.10592	4.22071	DYNC1H1;MAP1B;GARS;UBA1
Osteogenesis imperfecta	2/20	0.135511	0.497737	0	0	3.33075	6.65717	SPARC;P4HB
Phaeochromocytoma	2/20	0.135511	0.497737	0	0	3.33075	6.65717	CHGA;RET
Pitt-Hopkins syndrome	2/20	0.135511	0.497737	0	0	3.33075	6.65717	FOXG1;TCF4
Progeria	2/20	0.135511	0.497737	0	0	3.33075	6.65717	ZMPSTE24;SF1
Tularemia	2/20	0.135511	0.497737	0	0	3.33075	6.65717	HSPD1;FTL
Osteomyelitis	2/21	0.146718	0.497737	0	0	3.15528	6.05576	IL1RN;IL1B
AGAT deficiency	1/5	0.151632	0.497737	0	0	7.488	14.1246	DDX21
Acrodysostosis	1/5	0.151632	0.497737	0	0	7.488	14.1246	GNAS
Acute promyelocytic leukemia	1/5	0.151632	0.497737	0	0	7.488	14.1246	NPM1
Monoclonal gammopathy of uncertain significance	1/5	0.151632	0.497737	0	0	7.488	14.1246	WHSC1
Mucopolysaccharidosis II	1/5	0.151632	0.497737	0	0	7.488	14.1246	IDS
Agraphia	1/5	0.151632	0.497737	0	0	7.488	14.1246	GRN
Alport syndrome	1/5	0.151632	0.497737	0	0	7.488	14.1246	MYH9
Myelofibrosis	1/5	0.151632	0.497737	0	0	7.488	14.1246	CALR
Ohdo syndrome	1/5	0.151632	0.497737	0	0	7.488	14.1246	YWHAE
Autosomal recessive early-onset Parkinson disease 15	1/5	0.151632	0.497737	0	0	7.488	14.1246	MAGED1
Parotitis	1/5	0.151632	0.497737	0	0	7.488	14.1246	PGRMC1
Burkitt lymphoma	1/5	0.151632	0.497737	0	0	7.488	14.1246	MAPRE2
Cervicitis	1/5	0.151632	0.497737	0	0	7.488	14.1246	FLNA
Chromosome 13q14 deletion syndrome	1/5	0.151632	0.497737	0	0	7.488	14.1246	SOX11
Chromosome 4q21 deletion syndrome	1/5	0.151632	0.497737	0	0	7.488	14.1246	HNRNPD
Chronic NK-cell lymphocytosis	1/5	0.151632	0.497737	0	0	7.488	14.1246	NCAM1
Progressive muscular atrophy	1/5	0.151632	0.497737	0	0	7.488	14.1246	KIF5C
Prostatic adenoma	1/5	0.151632	0.497737	0	0	7.488	14.1246	SLC25A6
Proteus syndrome	1/5	0.151632	0.497737	0	0	7.488	14.1246	IGF2
Retinitis	1/5	0.151632	0.497737	0	0	7.488	14.1246	ACTG1
Cutaneous anthrax	1/5	0.151632	0.497737	0	0	7.488	14.1246	EEF1A1
DNA ligase IV deficiency	1/5	0.151632	0.497737	0	0	7.488	14.1246	PRKDC
DOID:3858	1/5	0.151632	0.497737	0	0	7.488	14.1246	SMARCA4
Dracunculiasis	1/5	0.151632	0.497737	0	0	7.488	14.1246	ONECUT3
Dressler's syndrome	1/5	0.151632	0.497737	0	0	7.488	14.1246	CKB
Spiradenoma	1/5	0.151632	0.497737	0	0	7.488	14.1246	PHLDA1
Splenic infarction	1/5	0.151632	0.497737	0	0	7.488	14.1246	PCSK1N
Epidemic typhus	1/5	0.151632	0.497737	0	0	7.488	14.1246	SARS
Epididymitis	1/5	0.151632	0.497737	0	0	7.488	14.1246	TUBB4B
Subclavian artery aneurysm	1/5	0.151632	0.497737	0	0	7.488	14.1246	PCSK1N
Urea cycle disorder	1/5	0.151632	0.497737	0	0	7.488	14.1246	ASS1
Giant cell tumor	1/5	0.151632	0.497737	0	0	7.488	14.1246	H3F3A
Goodpasture syndrome	1/5	0.151632	0.497737	0	0	7.488	14.1246	RAN
Heavy chain disease	1/5	0.151632	0.497737	0	0	7.488	14.1246	SLC3A2
steroid-induced glaucoma	1/5	0.151632	0.497737	0	0	7.488	14.1246	CDC42EP3
Hyperlysinemia	1/5	0.151632	0.497737	0	0	7.488	14.1246	PTPRZ1
Hypochromic anemia	1/5	0.151632	0.497737	0	0	7.488	14.1246	NDFIP1
Incontinentia pigmenti achromians	1/5	0.151632	0.497737	0	0	7.488	14.1246	IGF2
Lethal midline granuloma	1/5	0.151632	0.497737	0	0	7.488	14.1246	NCAM1
Lipoid proteinosis	1/5	0.151632	0.497737	0	0	7.488	14.1246	HSPG2
Agammaglobulinemia	2/22	0.158105	0.497737	0	0	2.99736	5.52862	CD81;LRBA
Rhinitis	2/22	0.158105	0.497737	0	0	2.99736	5.52862	CD63;IL1B
Gastritis	3/43	0.161717	0.497737	0	0	2.24918	4.09781	CHGA;IL1RN;HSPD1
Choreatic disease	2/23	0.169649	0.497737	0	0	2.85449	5.06392	DPYSL5;FTL
Esophageal atresia	2/23	0.169649	0.497737	0	0	2.85449	5.06392	SOX2;KIDINS220
Candidiasis	3/44	0.169658	0.497737	0	0	2.19421	3.89247	HSP90AA1;IL1B;ENO1
Beckwith-Wiedemann syndrome	3/45	0.177709	0.497737	0	0	2.14186	3.70029	NSD1;IGF2;GNAS
Thalassemia	3/45	0.177709	0.497737	0	0	2.14186	3.70029	GDF15;LRBA;H3F3A
Gastroenteritis	3/45	0.177709	0.497737	0	0	2.14186	3.70029	BAG6;NONO;PLXNA1
Keratoconus	3/45	0.177709	0.497737	0	0	2.14186	3.70029	FLNA;TIMP1;TGFBI
Mouth disease	1/6	0.179083	0.497737	0	0	5.99009	10.3024	SPP1
Neuroaxonal dystrophy	1/6	0.179083	0.497737	0	0	5.99009	10.3024	SYT4
Ocular cancer	1/6	0.179083	0.497737	0	0	5.99009	10.3024	SF3B1
Bartter disease	1/6	0.179083	0.497737	0	0	5.99009	10.3024	MAGED2
Carrion's Disease	1/6	0.179083	0.497737	0	0	5.99009	10.3024	HSPD1
Chondroblastoma	1/6	0.179083	0.497737	0	0	5.99009	10.3024	H3F3A
Recurrent corneal erosion	1/6	0.179083	0.497737	0	0	5.99009	10.3024	TGFBI
Creutzfeldt-Jakob disease	1/6	0.179083	0.497737	0	0	5.99009	10.3024	STMN2
Cushing's syndrome	1/6	0.179083	0.497737	0	0	5.99009	10.3024	GNAS
Dacryoadenitis	1/6	0.179083	0.497737	0	0	5.99009	10.3024	HSPG2
Scabies	1/6	0.179083	0.497737	0	0	5.99009	10.3024	FLNA
Skeletal muscle neoplasm	1/6	0.179083	0.497737	0	0	5.99009	10.3024	NACA
Spinocerebellar ataxia type 17	1/6	0.179083	0.497737	0	0	5.99009	10.3024	HSPA8
Spotted fever	1/6	0.179083	0.497737	0	0	5.99009	10.3024	HSPD1
Epidermolysis bullosa acquisita	1/6	0.179083	0.497737	0	0	5.99009	10.3024	HSP90AA1
Ewing sarcoma	1/6	0.179083	0.497737	0	0	5.99009	10.3024	FUS
Vaginal discharge	1/6	0.179083	0.497737	0	0	5.99009	10.3024	FLNA
Vestibular neuronitis	1/6	0.179083	0.497737	0	0	5.99009	10.3024	EIF1
Infantile myofibromatosis	1/6	0.179083	0.497737	0	0	5.99009	10.3024	NDRG4
Infantile onset spinocerebellar ataxia	1/6	0.179083	0.497737	0	0	5.99009	10.3024	INA
Inverted papilloma	1/6	0.179083	0.497737	0	0	5.99009	10.3024	FSCN1
Lymphangioma	1/6	0.179083	0.497737	0	0	5.99009	10.3024	PROX1
Lymphocele	1/6	0.179083	0.497737	0	0	5.99009	10.3024	RPL34
Amblyopia	2/24	0.181329	0.497737	0	0	2.72459	4.65209	SBK1;PHOX2A
Ankylosing spondylitis	2/24	0.181329	0.497737	0	0	2.72459	4.65209	HLA-B;KIF21B
Connective tissue disease	2/24	0.181329	0.497737	0	0	2.72459	4.65209	CTNNB1;EIF3E
Treacher Collins syndrome	2/24	0.181329	0.497737	0	0	2.72459	4.65209	RPS14;NOLC1
Alzheimer's disease	9/195	0.182022	0.497737	0	0	1.45366	2.47649	RPN2;BASP1;CELF2;CDC42EP3;S100A6;UNC5C;NCAM1;PROX1;HMGB1
Hepatitis	3/46	0.185862	0.497737	0	0	2.09194	3.52021	GAL;CPE;TIMP1
Mastitis	3/46	0.185862	0.497737	0	0	2.09194	3.52021	MGEA5;CACNA2D1;IL1B
Attention deficit hyperactivity disorder	6/119	0.188428	0.497737	0	0	1.59375	2.66003	SYT4;UNC5B;NCL;MAP1B;CDC42EP3;CDH13
Apraxia	2/25	0.193122	0.497737	0	0	2.606	4.28539	GRN;MAPT
Astigmatism	2/25	0.193122	0.497737	0	0	2.606	4.28539	SBK1;FLNA
Familial adenomatous polyposis	2/25	0.193122	0.497737	0	0	2.606	4.28539	CCND1;CTNNB1
Leukodystrophy	2/25	0.193122	0.497737	0	0	2.606	4.28539	PSAP;HSPD1
Lymphedema	2/25	0.193122	0.497737	0	0	2.606	4.28539	PROX1;GATA2
Klinefelter's syndrome	2/26	0.205011	0.497737	0	0	2.49729	3.95744	SPRY4;DUSP6
Aicardi-Goutieres syndrome	1/7	0.205648	0.497737	0	0	4.99149	7.89449	ADAR
Multiple personality disorder	1/7	0.205648	0.497737	0	0	4.99149	7.89449	PEG10
Mutism	1/7	0.205648	0.497737	0	0	4.99149	7.89449	ATP1A3
Alpha thalassemia	1/7	0.205648	0.497737	0	0	4.99149	7.89449	SMARCA4
Angiokeratoma	1/7	0.205648	0.497737	0	0	4.99149	7.89449	PROX1
Neonatal abstinence syndrome	1/7	0.205648	0.497737	0	0	4.99149	7.89449	PNOC
Bacillary angiomatosis	1/7	0.205648	0.497737	0	0	4.99149	7.89449	RPL4
Baraitser-Winter syndrome	1/7	0.205648	0.497737	0	0	4.99149	7.89449	ACTB
Blau syndrome	1/7	0.205648	0.497737	0	0	4.99149	7.89449	ATN1
Peyronie's disease	1/7	0.205648	0.497737	0	0	4.99149	7.89449	PTN
Photosensitive epilepsy	1/7	0.205648	0.497737	0	0	4.99149	7.89449	BRD2
Chordoma	1/7	0.205648	0.497737	0	0	4.99149	7.89449	RPS23
Chromosome 2p16.1-p15 deletion syndrome	1/7	0.205648	0.497737	0	0	4.99149	7.89449	RPS5
Colon carcinoma in situ	1/7	0.205648	0.497737	0	0	4.99149	7.89449	SLC3A2
Psoriatic arthritis	1/7	0.205648	0.497737	0	0	4.99149	7.89449	HLA-B
Schizotypal personality disorder	1/7	0.205648	0.497737	0	0	4.99149	7.89449	PSAT1
Serine deficiency	1/7	0.205648	0.497737	0	0	4.99149	7.89449	BCAT1
Sinoatrial node disease	1/7	0.205648	0.497737	0	0	4.99149	7.89449	MALAT1
Eczema herpeticum	1/7	0.205648	0.497737	0	0	4.99149	7.89449	ATP2A2
Endometrial stromal nodule	1/7	0.205648	0.497737	0	0	4.99149	7.89449	YWHAE
Eosinophilic meningitis	1/7	0.205648	0.497737	0	0	4.99149	7.89449	YWHAB
Esophageal carcinoma	1/7	0.205648	0.497737	0	0	4.99149	7.89449	CTNNB1
Exotropia	1/7	0.205648	0.497737	0	0	4.99149	7.89449	PHOX2A
Farber lipogranulomatosis	1/7	0.205648	0.497737	0	0	4.99149	7.89449	PSAP
Thyroid adenoma	1/7	0.205648	0.497737	0	0	4.99149	7.89449	RET
Frontal lobe epilepsy	1/7	0.205648	0.497737	0	0	4.99149	7.89449	CHRNA3
Funisitis	1/7	0.205648	0.497737	0	0	4.99149	7.89449	TRIM67
Glomerulonephritis	1/7	0.205648	0.497737	0	0	4.99149	7.89449	FTH1
Granular cell tumor	1/7	0.205648	0.497737	0	0	4.99149	7.89449	UCHL1
cartilage-hair hypoplasia	1/7	0.205648	0.497737	0	0	4.99149	7.89449	RMRP
protein-energy malnutrition	1/7	0.205648	0.497737	0	0	4.99149	7.89449	TTR
Hypochondriasis	1/7	0.205648	0.497737	0	0	4.99149	7.89449	GATA3
Laron syndrome	1/7	0.205648	0.497737	0	0	4.99149	7.89449	IGFBP3
Allergic hypersensitivity disease	6/123	0.208448	0.498496	0	0	1.53894	2.41316	MGEA5;CD63;IL1B;GATA3;HSPG2;TPT1
Microphthalmia	2/27	0.216975	0.498496	0	0	2.39727	3.66297	SOX2;MAB21L2
Oculocutaneous albinism	2/27	0.216975	0.498496	0	0	2.39727	3.66297	CD63;CANX
Hypertension	12/289	0.227974	0.498496	0	0	1.30141	1.92417	CHGA;MGEA5;RPS19;IL1B;SPP1;CALM3;CALM1;B2M;CALM2;MMP9;ACTB;RHOA
Acromegaly	2/28	0.228999	0.498496	0	0	2.30495	3.39759	IGFBP3;IGF2
Dystonia	2/28	0.228999	0.498496	0	0	2.30495	3.39759	ATP1A3;ACTB
ENSP00000256078	2/28	0.228999	0.498496	0	0	2.30495	3.39759	CTNNB1;SF3B1
Turner syndrome	2/28	0.228999	0.498496	0	0	2.30495	3.39759	RPS4X;IGFBP3
ADULT syndrome	1/8	0.231354	0.498496	0	0	4.2782	6.26245	SLC38A2
Metanephric adenoma	1/8	0.231354	0.498496	0	0	4.2782	6.26245	NCAM1
Myelodysplastic syndrome	1/8	0.231354	0.498496	0	0	4.2782	6.26245	RPS14
Necrotizing fasciitis	1/8	0.231354	0.498496	0	0	4.2782	6.26245	RPS16
Olivopontocerebellar atrophy	1/8	0.231354	0.498496	0	0	4.2782	6.26245	MAP1B
Osteoblastoma	1/8	0.231354	0.498496	0	0	4.2782	6.26245	SPARC
Patent foramen ovale	1/8	0.231354	0.498496	0	0	4.2782	6.26245	MYH9
Pigmented villonodular synovitis	1/8	0.231354	0.498496	0	0	4.2782	6.26245	LAPTM5
Choroid plexus papilloma	1/8	0.231354	0.498496	0	0	4.2782	6.26245	TTR
Primary pigmented nodular adrenocortical disease	1/8	0.231354	0.498496	0	0	4.2782	6.26245	GNAS
Reticulate acropigmentation of Kitamura	1/8	0.231354	0.498496	0	0	4.2782	6.26245	ADAR
Schimke immuno-osseous dysplasia	1/8	0.231354	0.498496	0	0	4.2782	6.26245	SMARCA4
Developmental coordination disorder	1/8	0.231354	0.498496	0	0	4.2782	6.26245	RTN4
Dysembryoplastic neuroepithelial tumor	1/8	0.231354	0.498496	0	0	4.2782	6.26245	TUBB3
Erythema multiforme	1/8	0.231354	0.498496	0	0	4.2782	6.26245	HLA-A
Focal dermal hypoplasia	1/8	0.231354	0.498496	0	0	4.2782	6.26245	WLS
Granulomatous amebic encephalitis	1/8	0.231354	0.498496	0	0	4.2782	6.26245	PSAT1
Hemorrhagic disease	1/8	0.231354	0.498496	0	0	4.2782	6.26245	CALR
Henoch-Schoenlein purpura	1/8	0.231354	0.498496	0	0	4.2782	6.26245	HSP90AA1
Hiatus hernia	1/8	0.231354	0.498496	0	0	4.2782	6.26245	ISLR2
Keratoconjunctivitis	1/8	0.231354	0.498496	0	0	4.2782	6.26245	PLD3
Lymphogranuloma venereum	1/8	0.231354	0.498496	0	0	4.2782	6.26245	TMBIM6
Malignant fibroxanthoma	1/8	0.231354	0.498496	0	0	4.2782	6.26245	RUFY3
Lupus erythematosus	4/77	0.238441	0.498496	0	0	1.64298	2.35544	H1F0;HMGB1;RPS2;CALR
Multiple system atrophy	2/29	0.241065	0.498496	0	0	2.21947	3.15761	SNCG;MAPT
Werner syndrome	2/29	0.241065	0.498496	0	0	2.21947	3.15761	PRKDC;XRCC5
Orofacial cleft	3/53	0.245228	0.498496	0	0	1.79842	2.52779	TTR;CADM1;MKI67
Type 1 diabetes mellitus	7/158	0.251498	0.498496	0	0	1.39087	1.91985	BAG6;BRD2;TUBB;HLA-B;IGF2;IER3;PRRC2A
Major depressive disorder	4/79	0.252562	0.498496	0	0	1.599	2.20039	NTRK2;IL1B;GATA3;RTN4
Hyperphosphatemia	2/30	0.253158	0.498496	0	0	2.14009	2.93993	SPP1;GNAS
Adenocarcinoma	1/9	0.25623	0.498496	0	0	3.74323	5.09708	CHRNA3
Mood disorder	1/9	0.25623	0.498496	0	0	3.74323	5.09708	ATP5G3
Multiple myeloma	1/9	0.25623	0.498496	0	0	3.74323	5.09708	WHSC1
Myotonia congenita	1/9	0.25623	0.498496	0	0	3.74323	5.09708	CNBP
Asthenopia	1/9	0.25623	0.498496	0	0	3.74323	5.09708	CADM1
Ossifying fibroma	1/9	0.25623	0.498496	0	0	3.74323	5.09708	GNAS
Pernicious anemia	1/9	0.25623	0.498496	0	0	3.74323	5.09708	CHGA
Pilomatrixoma	1/9	0.25623	0.498496	0	0	3.74323	5.09708	CTNNB1
Pseudosarcomatous fibromatosis	1/9	0.25623	0.498496	0	0	3.74323	5.09708	MYH9
Purine nucleoside phosphorylase deficiency	1/9	0.25623	0.498496	0	0	3.74323	5.09708	AHCY
Corneal ectasia	1/9	0.25623	0.498496	0	0	3.74323	5.09708	SBK1
Detrusor sphincter dyssynergia	1/9	0.25623	0.498496	0	0	3.74323	5.09708	RPS24
Sialadenitis	1/9	0.25623	0.498496	0	0	3.74323	5.09708	HSPG2
Ehrlichiosis	1/9	0.25623	0.498496	0	0	3.74323	5.09708	HSPD1
Spermatic cord torsion	1/9	0.25623	0.498496	0	0	3.74323	5.09708	SPTAN1
Spondyloepimetaphyseal dysplasia	1/9	0.25623	0.498496	0	0	3.74323	5.09708	RMRP
Esophageal varix	1/9	0.25623	0.498496	0	0	3.74323	5.09708	EVL
Fetal alcohol syndrome	1/9	0.25623	0.498496	0	0	3.74323	5.09708	ADNP
Gastric antral vascular ectasia	1/9	0.25623	0.498496	0	0	3.74323	5.09708	DDX21
Gastroschisis	1/9	0.25623	0.498496	0	0	3.74323	5.09708	INA
Hailey-Hailey disease	1/9	0.25623	0.498496	0	0	3.74323	5.09708	ATP2A2
Wolff-Parkinson-White syndrome	1/9	0.25623	0.498496	0	0	3.74323	5.09708	CACNA2D1
Zollinger-Ellison Syndrome	1/9	0.25623	0.498496	0	0	3.74323	5.09708	CHGA
cat-scratch disease	1/9	0.25623	0.498496	0	0	3.74323	5.09708	HSPD1
locked-in syndrome	1/9	0.25623	0.498496	0	0	3.74323	5.09708	FUS
Hyperkalemic periodic paralysis	1/9	0.25623	0.498496	0	0	3.74323	5.09708	PTPRZ1
Hypersplenism	1/9	0.25623	0.498496	0	0	3.74323	5.09708	EVL
Hyperthyroxinemia	1/9	0.25623	0.498496	0	0	3.74323	5.09708	TTR
Hypophosphatasia	1/9	0.25623	0.498496	0	0	3.74323	5.09708	SPP1
Idiopathic generalized epilepsy	1/9	0.25623	0.498496	0	0	3.74323	5.09708	BRD2
IgA glomerulonephritis	1/9	0.25623	0.498496	0	0	3.74323	5.09708	HLA-A
Inclusion body myopathy with Paget disease of bone and frontotemporal dementia	1/9	0.25623	0.498496	0	0	3.74323	5.09708	SQSTM1
Inclusion body myositis	1/9	0.25623	0.498496	0	0	3.74323	5.09708	APP
Kindler syndrome	1/9	0.25623	0.498496	0	0	3.74323	5.09708	MSN
Disease of anatomical entity	2/31	0.265265	0.513167	0	0	2.06619	2.74188	DDX21;ATP9A
Wolf-Hirschhorn syndrome	2/31	0.265265	0.513167	0	0	2.06619	2.74188	NSD1;WHSC1
Alopecia areata	3/56	0.271538	0.513167	0	0	1.69636	2.21146	BAG6;IER3;PRRC2A
Chronic obstructive pulmonary disease	6/135	0.272411	0.513167	0	0	1.39491	1.814	APP;CHRNA3;SNRPN;LRP1;MAPT;VAT1L
Acrocallosal syndrome	1/10	0.280301	0.513167	0	0	3.32714	4.23176	ACLY
Musculoskeletal system disease	1/10	0.280301	0.513167	0	0	3.32714	4.23176	HLA-B
Benign epilepsy with centrotemporal spikes	1/10	0.280301	0.513167	0	0	3.32714	4.23176	RBFOX2
Prostate carcinoma in situ	1/10	0.280301	0.513167	0	0	3.32714	4.23176	ALDOA
Congenital myopathy	1/10	0.280301	0.513167	0	0	3.32714	4.23176	CNTN1
Q fever	1/10	0.280301	0.513167	0	0	3.32714	4.23176	EPRS
Contagious pustular dermatitis	1/10	0.280301	0.513167	0	0	3.32714	4.23176	SERBP1
Decubitus ulcer	1/10	0.280301	0.513167	0	0	3.32714	4.23176	TTR
Squamous cell carcinoma	1/10	0.280301	0.513167	0	0	3.32714	4.23176	EML4
Epidermolytic hyperkeratosis	1/10	0.280301	0.513167	0	0	3.32714	4.23176	ATP2A2
Tethered spinal cord syndrome	1/10	0.280301	0.513167	0	0	3.32714	4.23176	KIDINS220
Thymoma	1/10	0.280301	0.513167	0	0	3.32714	4.23176	DPYSL5
Tinea capitis	1/10	0.280301	0.513167	0	0	3.32714	4.23176	SLC7A1
Fibrous dysplasia	1/10	0.280301	0.513167	0	0	3.32714	4.23176	GNAS
Glycoproteinosis	1/10	0.280301	0.513167	0	0	3.32714	4.23176	PSAP
Hematologic cancer	1/10	0.280301	0.513167	0	0	3.32714	4.23176	GATA2
Hydranencephaly	1/10	0.280301	0.513167	0	0	3.32714	4.23176	TUBA1A
Krabbe disease	1/10	0.280301	0.513167	0	0	3.32714	4.23176	PSAP
Langerhans-cell histiocytosis	1/10	0.280301	0.513167	0	0	3.32714	4.23176	FSCN1
Pancreatic cancer	6/137	0.283522	0.517735	0	0	1.37347	1.73122	LRP1;GNAS;CTNNB1;ANK2;SF3B1;SMARCA4
Prader-Willi syndrome	3/58	0.289244	0.521075	0	0	1.6345	2.02757	SNRPN;MAGED1;IGFBP2
Cholera	2/33	0.289463	0.521075	0	0	1.93268	2.396	PARP1;NONO
Hyperopia	2/33	0.289463	0.521075	0	0	1.93268	2.396	SBK1;TUBB3
Aarskog-Scott syndrome	1/11	0.303595	0.521075	0	0	2.99427	3.56935	CDC42
Acute myeloid leukemia	1/11	0.303595	0.521075	0	0	2.99427	3.56935	NSD1
Mucopolysaccharidosis	1/11	0.303595	0.521075	0	0	2.99427	3.56935	IDS
Myoepithelioma	1/11	0.303595	0.521075	0	0	2.99427	3.56935	PBX1
Campylobacteriosis	1/11	0.303595	0.521075	0	0	2.99427	3.56935	RPS21
Perlman syndrome	1/11	0.303595	0.521075	0	0	2.99427	3.56935	RMRP
Central sleep apnea	1/11	0.303595	0.521075	0	0	2.99427	3.56935	STMN3
Cervix uteri carcinoma in situ	1/11	0.303595	0.521075	0	0	2.99427	3.56935	MRFAP1
Citrullinemia	1/11	0.303595	0.521075	0	0	2.99427	3.56935	SLC25A3
Pulmonary alveolar proteinosis	1/11	0.303595	0.521075	0	0	2.99427	3.56935	GATA2
Rectal prolapse	1/11	0.303595	0.521075	0	0	2.99427	3.56935	KIDINS220
Cornea plana	1/11	0.303595	0.521075	0	0	2.99427	3.56935	SBK1
Dermatomyositis	1/11	0.303595	0.521075	0	0	2.99427	3.56935	HSPG2
Stiff-Person syndrome	1/11	0.303595	0.521075	0	0	2.99427	3.56935	DPYSL5
Esotropia	1/11	0.303595	0.521075	0	0	2.99427	3.56935	RPL18
Timothy syndrome	1/11	0.303595	0.521075	0	0	2.99427	3.56935	CACNA2D1
Trigeminal neuralgia	1/11	0.303595	0.521075	0	0	2.99427	3.56935	PGRMC1
Histiocytosis	1/11	0.303595	0.521075	0	0	2.99427	3.56935	UCHL1
Intestinal obstruction	1/11	0.303595	0.521075	0	0	2.99427	3.56935	RET
Juvenile myoclonic epilepsy	1/11	0.303595	0.521075	0	0	2.99427	3.56935	BRD2
Leukemia	1/11	0.303595	0.521075	0	0	2.99427	3.56935	GATA3
Lipomatosis	1/11	0.303595	0.521075	0	0	2.99427	3.56935	IGF2
Hyperthyroidism	2/35	0.313563	0.530436	0	0	1.81536	2.10538	TTR;GNAS
Lipid metabolism disorder	2/35	0.313563	0.530436	0	0	1.81536	2.10538	HMGCR;CELSR2
Ulcerative colitis	5/115	0.315599	0.530436	0	0	1.36243	1.57127	ARPC2;CACNA2D1;CDH13;KIF21B;HLA-A
Lung cancer	15/400	0.315816	0.530436	0	0	1.16932	1.34776	RET;NTRK2;CHRNA3;RTN1;SMARCA4;NELL2;EEF1B2;CDH2;PTPRZ1;DNER;GNAS;CTNNB1;KIF1B;LCP1;NES
Down syndrome	4/89	0.325167	0.530436	0	0	1.41015	1.58419	APP;TTC3;MAPT;DBN1
Muscular dystrophy	2/36	0.325548	0.530436	0	0	1.76188	1.97726	CCT3;CNBP
Melancholia	1/12	0.326136	0.530436	0	0	2.72193	3.04975	GATA3
Alexithymia	1/12	0.326136	0.530436	0	0	2.72193	3.04975	CCT7
Anal fistula	1/12	0.326136	0.530436	0	0	2.72193	3.04975	KIDINS220
Narcolepsy	1/12	0.326136	0.530436	0	0	2.72193	3.04975	CDH13
Neutral lipid storage disease	1/12	0.326136	0.530436	0	0	2.72193	3.04975	PLIN2
Partial central choroid dystrophy	1/12	0.326136	0.530436	0	0	2.72193	3.04975	PRPF8
Pneumocystosis	1/12	0.326136	0.530436	0	0	2.72193	3.04975	ACTG1
Chronic intestinal vascular insufficiency	1/12	0.326136	0.530436	0	0	2.72193	3.04975	WLS
Sideroblastic anemia	1/12	0.326136	0.530436	0	0	2.72193	3.04975	PJA2
Duodenal ulcer	1/12	0.326136	0.530436	0	0	2.72193	3.04975	IL1RN
Ebstein anomaly	1/12	0.326136	0.530436	0	0	2.72193	3.04975	MAP6
Spondyloepiphyseal dysplasia with congenital joint dislocations	1/12	0.326136	0.530436	0	0	2.72193	3.04975	SMARCA4
Epilepsy	1/12	0.326136	0.530436	0	0	2.72193	3.04975	NFE2L1
Esophageal cancer	1/12	0.326136	0.530436	0	0	2.72193	3.04975	RPL6
Waterhouse-Friderichsen syndrome	1/12	0.326136	0.530436	0	0	2.72193	3.04975	MVD
Lateral sclerosis	1/12	0.326136	0.530436	0	0	2.72193	3.04975	FUS
Lysinuric protein intolerance	1/12	0.326136	0.530436	0	0	2.72193	3.04975	SLC7A5
Vitiligo	3/63	0.33377	0.532972	0	0	1.4979	1.64366	ZMIZ1;HLA-A;IER3
Acute cystitis	2/37	0.337478	0.532972	0	0	1.71145	1.85907	MGEA5;B2M
Periodontal disease	2/37	0.337478	0.532972	0	0	1.71145	1.85907	CCL20;TIMP1
Kidney disease	4/91	0.339914	0.532972	0	0	1.37759	1.48651	GNAS;NRXN2;CALM2;RPS12
DOID:2627	4/92	0.347296	0.532972	0	0	1.36187	1.44028	AHNAK;H3F3A;ANK2;HSPG2
Melioidosis	1/13	0.347949	0.532972	0	0	2.49497	2.63394	HSPD1
Amyotrophic lateral sclerosis type 5	1/13	0.347949	0.532972	0	0	2.49497	2.63394	TRIM2
Neonatal jaundice	1/13	0.347949	0.532972	0	0	2.49497	2.63394	PKM
Basal cell carcinoma	1/13	0.347949	0.532972	0	0	2.49497	2.63394	PHLDA1
Benign paroxysmal positional nystagmus	1/13	0.347949	0.532972	0	0	2.49497	2.63394	RGS5
Bernard-Soulier syndrome	1/13	0.347949	0.532972	0	0	2.49497	2.63394	MYH9
Parasitic helminthiasis infectious disease	1/13	0.347949	0.532972	0	0	2.49497	2.63394	IL1B
Craniopharyngioma	1/13	0.347949	0.532972	0	0	2.49497	2.63394	CTNNB1
Cryptosporidiosis	1/13	0.347949	0.532972	0	0	2.49497	2.63394	DBI
Severe combined immunodeficiency	1/13	0.347949	0.532972	0	0	2.49497	2.63394	PRKDC
Dry eye syndrome	1/13	0.347949	0.532972	0	0	2.49497	2.63394	HSPG2
Endometriosis	1/13	0.347949	0.532972	0	0	2.49497	2.63394	CDC42
Transient cerebral ischemia	1/13	0.347949	0.532972	0	0	2.49497	2.63394	RPSA
Tuberculosis	1/13	0.347949	0.532972	0	0	2.49497	2.63394	CDH13
Gingival recession	1/13	0.347949	0.532972	0	0	2.49497	2.63394	IL1B
Hemiplegia	1/13	0.347949	0.532972	0	0	2.49497	2.63394	ATP1A3
Hepatic encephalopathy	1/13	0.347949	0.532972	0	0	2.49497	2.63394	DBI
Holt-Oram syndrome	1/13	0.347949	0.532972	0	0	2.49497	2.63394	TBX3
Imperforate anus	1/13	0.347949	0.532972	0	0	2.49497	2.63394	KIDINS220
Intracranial aneurysm	1/13	0.347949	0.532972	0	0	2.49497	2.63394	SF3B1
Keshan disease	1/13	0.347949	0.532972	0	0	2.49497	2.63394	EMILIN1
Koolen de Vries syndrome	1/13	0.347949	0.532972	0	0	2.49497	2.63394	MAPT
Neurofibromatosis	2/38	0.349343	0.532972	0	0	1.66382	1.74985	RET;MSN
post-traumatic stress disorder	2/38	0.349343	0.532972	0	0	1.66382	1.74985	NTRK2;RTN4
Amnestic disorder	2/39	0.361135	0.533978	0	0	1.61877	1.64873	RPL4;EIF4G2
Night blindness	2/39	0.361135	0.533978	0	0	1.61877	1.64873	PLIN2;PRPF8
Chondrodysplasia punctata	2/39	0.361135	0.533978	0	0	1.61877	1.64873	MSMO1;DHCR24
Scoliosis	2/39	0.361135	0.533978	0	0	1.61877	1.64873	RPL34;IGF2
Diarrhea	6/151	0.363391	0.533978	0	0	1.23996	1.25518	BAG6;RET;CHGA;TTR;IL1B;CPE
Antley-Bixler syndrome	1/14	0.369056	0.533978	0	0	2.30293	2.29557	DHCR24
Bacterial vaginosis	1/14	0.369056	0.533978	0	0	2.30293	2.29557	IL1B
Pericarditis	1/14	0.369056	0.533978	0	0	2.30293	2.29557	IL1RN
Pleurisy	1/14	0.369056	0.533978	0	0	2.30293	2.29557	EPRS
Prostatitis	1/14	0.369056	0.533978	0	0	2.30293	2.29557	IL1B
Radiculopathy	1/14	0.369056	0.533978	0	0	2.30293	2.29557	RPL34
Corneal edema	1/14	0.369056	0.533978	0	0	2.30293	2.29557	TGFBI
Cryoglobulinemia	1/14	0.369056	0.533978	0	0	2.30293	2.29557	CD81
Rett syndrome	1/14	0.369056	0.533978	0	0	2.30293	2.29557	FOXG1
Skin atrophy	1/14	0.369056	0.533978	0	0	2.30293	2.29557	RPL13
Dysthymic disorder	1/14	0.369056	0.533978	0	0	2.30293	2.29557	GATA3
Enamel erosion	1/14	0.369056	0.533978	0	0	2.30293	2.29557	SMARCA4
Facial paralysis	1/14	0.369056	0.533978	0	0	2.30293	2.29557	CADM1
Fibrodysplasia ossificans progressiva	1/14	0.369056	0.533978	0	0	2.30293	2.29557	GNAS
Gas gangrene	1/14	0.369056	0.533978	0	0	2.30293	2.29557	CPE
Hepatitis C	1/14	0.369056	0.533978	0	0	2.30293	2.29557	SCG2
Hereditary spherocytosis	1/14	0.369056	0.533978	0	0	2.30293	2.29557	ANK2
Interstitial lung disease	1/14	0.369056	0.533978	0	0	2.30293	2.29557	MAPT
Kennedy's disease	1/14	0.369056	0.533978	0	0	2.30293	2.29557	DNAJA1
Klippel-Trenaunay syndrome	1/14	0.369056	0.533978	0	0	2.30293	2.29557	IGF2
Thrombocytopenia	4/95	0.369447	0.533978	0	0	1.31677	1.31117	FOXG1;MYH9;NCAM1;B2M
Optic atrophy	2/40	0.372846	0.536853	0	0	1.57609	1.55496	NR2F1;ATP1A3
Globe disease	3/68	0.378175	0.536853	0	0	1.38232	1.34417	CHD4;SPTBN1;TPT1
Cerebellar ataxia	3/69	0.386993	0.536853	0	0	1.36131	1.29235	DPYSL5;DNER;ATP1A3
Gout	3/69	0.386993	0.536853	0	0	1.36131	1.29235	NRXN2;PJA2;SF1
Mitral valve insufficiency	1/15	0.389482	0.536853	0	0	2.13832	2.01631	ATP5A1
Adams-Oliver syndrome	1/15	0.389482	0.536853	0	0	2.13832	2.01631	CDC42
Myasthenia gravis	1/15	0.389482	0.536853	0	0	2.13832	2.01631	AGRN
Antiphospholipid syndrome	1/15	0.389482	0.536853	0	0	2.13832	2.01631	ACLY
Autoimmune thyroiditis	1/15	0.389482	0.536853	0	0	2.13832	2.01631	RET
Panic disorder	1/15	0.389482	0.536853	0	0	2.13832	2.01631	RAN
Brugada syndrome	1/15	0.389482	0.536853	0	0	2.13832	2.01631	CACNA2D1
Peeling skin syndrome	1/15	0.389482	0.536853	0	0	2.13832	2.01631	RPL41
Persistent generalized lymphadenopathy	1/15	0.389482	0.536853	0	0	2.13832	2.01631	RET
Placental insufficiency	1/15	0.389482	0.536853	0	0	2.13832	2.01631	LGALS1
Plague	1/15	0.389482	0.536853	0	0	2.13832	2.01631	GAP43
Pseudohypoparathyroidism	1/15	0.389482	0.536853	0	0	2.13832	2.01631	GNAS
Roberts syndrome	1/15	0.389482	0.536853	0	0	2.13832	2.01631	MEG3
Shigellosis	1/15	0.389482	0.536853	0	0	2.13832	2.01631	IL1B
Tracheal stenosis	1/15	0.389482	0.536853	0	0	2.13832	2.01631	PGRMC1
Yellow fever	1/15	0.389482	0.536853	0	0	2.13832	2.01631	EIF3L
interleukin-7 receptor alpha deficiency	1/15	0.389482	0.536853	0	0	2.13832	2.01631	RPL5
Lambert-Eaton myasthenic syndrome	1/15	0.389482	0.536853	0	0	2.13832	2.01631	AGRN
Leptospirosis	1/15	0.389482	0.536853	0	0	2.13832	2.01631	RPLP2
McCune Albright syndrome	1/15	0.389482	0.536853	0	0	2.13832	2.01631	GNAS
Common cold	2/42	0.395998	0.544784	0	0	1.49713	1.38686	IL1B;MMP9
Cardiovascular system disease	9/246	0.401426	0.545153	0	0	1.13781	1.03852	FADS2;CDH2;PSAT1;NCAN;RPLP1;CDH13;HMGCR;CELSR2;SMARCA4
Aceruloplasminemia	1/16	0.409247	0.545153	0	0	1.99567	1.783	FTL
Multiple pterygium syndrome	1/16	0.409247	0.545153	0	0	1.99567	1.783	CNTN1
Myotonic dystrophy type 1	1/16	0.409247	0.545153	0	0	1.99567	1.783	CELF2
Neuromyelitis optica	1/16	0.409247	0.545153	0	0	1.99567	1.783	DPYSL5
Ophthalmoplegia	1/16	0.409247	0.545153	0	0	1.99567	1.783	PHOX2A
Oppositional defiant disorder	1/16	0.409247	0.545153	0	0	1.99567	1.783	RTN4
Orotic aciduria	1/16	0.409247	0.545153	0	0	1.99567	1.783	ASS1
Corneal dystrophy	1/16	0.409247	0.545153	0	0	1.99567	1.783	TGFBI
Shwachman-Diamond syndrome	1/16	0.409247	0.545153	0	0	1.99567	1.783	RPS14
Simpson-Golabi-Behmel syndrome	1/16	0.409247	0.545153	0	0	1.99567	1.783	IGF2
Tick infestation	1/16	0.409247	0.545153	0	0	1.99567	1.783	MAP1B
Fibromyalgia	1/16	0.409247	0.545153	0	0	1.99567	1.783	NCAM1
Tuberous sclerosis	1/16	0.409247	0.545153	0	0	1.99567	1.783	DCX
Variant Creutzfeldt-Jakob disease	1/16	0.409247	0.545153	0	0	1.99567	1.783	STMN2
Varicose veins	1/16	0.409247	0.545153	0	0	1.99567	1.783	EVL
Left ventricular noncompaction	1/16	0.409247	0.545153	0	0	1.99567	1.783	YWHAE
Acquired metabolic disease	12/338	0.412644	0.548655	0	0	1.10296	0.976309	RPS14;CDK6;DPYSL5;ZMIZ1;PSAT1;CDC42EP3;HMGA1;MSMO1;PROX1;ZNF664;NUDT3;PBX1
Pain agnosia	4/101	0.413535	0.548817	0	0	1.23493	1.09046	RPL34;IL1B;PNOC;AP2M1
Angelman syndrome	2/44	0.418749	0.554706	0	0	1.42569	1.24104	SNRPN;IGFBP2
Alcohol dependence	4/103	0.428097	0.56018	0	0	1.20986	1.02645	CHRNA3;PNOC;GARS;RTN4
Argininosuccinic aciduria	1/17	0.428373	0.56018	0	0	1.87084	1.58603	ASS1
Phenylketonuria	1/17	0.428373	0.56018	0	0	1.87084	1.58603	SNHG1
Conjunctivitis	1/17	0.428373	0.56018	0	0	1.87084	1.58603	PLD3
Stomatitis	1/17	0.428373	0.56018	0	0	1.87084	1.58603	HN1
relapsing-remitting multiple sclerosis	1/17	0.428373	0.56018	0	0	1.87084	1.58603	CELF2
Macroglobulinemia	1/17	0.428373	0.56018	0	0	1.87084	1.58603	B2M
Williams-Beuren syndrome	2/45	0.42996	0.560986	0	0	1.39246	1.17533	BAZ1B;YWHAG
Hypoglycemia	3/74	0.430561	0.560986	0	0	1.26511	1.06607	IGFBP3;IGFBP2;IGF2
Breast cancer	15/434	0.433856	0.56425	0	0	1.07251	0.895594	RET;DYNC1H1;AHNAK;LRP1;H3F3A;ANK2;HSPG2;SMARCA4;CCND1;ZMIZ1;FLNA;CTNNB1;SF3B1;SPTAN1;CHGB
Autistic disorder	1/18	0.446881	0.568757	0	0	1.7607	1.41818	MARCKS
Perinatal necrotizing enterocolitis	1/18	0.446881	0.568757	0	0	1.7607	1.41818	IL1B
Progressive relapsing multiple sclerosis	1/18	0.446881	0.568757	0	0	1.7607	1.41818	ATN1
Colorectal adenoma	1/18	0.446881	0.568757	0	0	1.7607	1.41818	RBM39
Deafness dystonia syndrome	1/18	0.446881	0.568757	0	0	1.7607	1.41818	ATP1A3
Ductal carcinoma in situ	1/18	0.446881	0.568757	0	0	1.7607	1.41818	CCND1
Epidermodysplasia verruciformis	1/18	0.446881	0.568757	0	0	1.7607	1.41818	DCAF7
Thyrotoxicosis	1/18	0.446881	0.568757	0	0	1.7607	1.41818	HLA-A
Von Willebrand's disease	1/18	0.446881	0.568757	0	0	1.7607	1.41818	NONO
Learning disability	1/18	0.446881	0.568757	0	0	1.7607	1.41818	NSD1
Lipoma	1/18	0.446881	0.568757	0	0	1.7607	1.41818	KIDINS220
Machado-Joseph disease	1/18	0.446881	0.568757	0	0	1.7607	1.41818	ATN1
Huntington's disease	3/76	0.447681	0.568762	0	0	1.23032	0.988779	NTRK2;ATN1;CPLX2
Essential hypertension	3/78	0.464591	0.579163	0	0	1.19739	0.917917	BAG6;MAP4;RPL6
Vascular disease	3/78	0.464591	0.579163	0	0	1.19739	0.917917	TSC22D1;CDH13;CELSR2
Microcephaly	1/19	0.46479	0.579163	0	0	1.6628	1.27398	TCF4
Multiple endocrine neoplasia type 2A	1/19	0.46479	0.579163	0	0	1.6628	1.27398	SHC1
Myositis	1/19	0.46479	0.579163	0	0	1.6628	1.27398	TARS
Blepharophimosis	1/19	0.46479	0.579163	0	0	1.6628	1.27398	HSPG2
Botulism	1/19	0.46479	0.579163	0	0	1.6628	1.27398	SV2A
Pellagra	1/19	0.46479	0.579163	0	0	1.6628	1.27398	GAPDH
Carney complex	1/19	0.46479	0.579163	0	0	1.6628	1.27398	GNAS
Spinocerebellar ataxia type 2	1/19	0.46479	0.579163	0	0	1.6628	1.27398	ATN1
Glycogen storage disease	1/19	0.46479	0.579163	0	0	1.6628	1.27398	ALDOA
Encephalitis	2/49	0.473606	0.58912	0	0	1.27369	0.951932	DPYSL5;CNTN1
Nephritis	1/20	0.482121	0.589442	0	0	1.5752	1.1492	RPS2
Congenital myasthenic syndrome	1/20	0.482121	0.589442	0	0	1.5752	1.1492	AGRN
Craniosynostosis	1/20	0.482121	0.589442	0	0	1.5752	1.1492	P4HB
Root resorption	1/20	0.482121	0.589442	0	0	1.5752	1.1492	IL1B
Diastrophic dysplasia	1/20	0.482121	0.589442	0	0	1.5752	1.1492	RPS14
Eating disorder	1/20	0.482121	0.589442	0	0	1.5752	1.1492	RTN4
Smallpox	1/20	0.482121	0.589442	0	0	1.5752	1.1492	CAPRIN1
Endometritis	1/20	0.482121	0.589442	0	0	1.5752	1.1492	IL1B
Fuchs' endothelial dystrophy	1/20	0.482121	0.589442	0	0	1.5752	1.1492	TCF4
dentatorubral-pallidoluysian atrophy	1/20	0.482121	0.589442	0	0	1.5752	1.1492	ATN1
Irritable bowel syndrome	2/50	0.4842	0.590972	0	0	1.24709	0.904464	CHGA;IL1B
Coronary artery disease	7/205	0.496216	0.597665	0	0	1.05812	0.741472	GDF15;IL1B;SPP1;HMGCR;CELSR2;MMP9;HSPD1
Mental depression	3/82	0.497699	0.597665	0	0	1.13653	0.793023	SYT4;CDH13;DDX21
Heart conduction disease	3/82	0.497699	0.597665	0	0	1.13653	0.793023	CDKN1A;CNOT1;ATP5G3
Autonomic neuropathy	1/21	0.498891	0.597665	0	0	1.49636	1.04052	TTR
Brain edema	1/21	0.498891	0.597665	0	0	1.49636	1.04052	MMP9
Cardiac arrest	1/21	0.498891	0.597665	0	0	1.49636	1.04052	ENO2
Congestive heart failure	1/21	0.498891	0.597665	0	0	1.49636	1.04052	GPM6A
Retinal disease	1/21	0.498891	0.597665	0	0	1.49636	1.04052	TCF4
Spinal cord disease	1/21	0.498891	0.597665	0	0	1.49636	1.04052	HNRNPA1
Varicocele	1/21	0.498891	0.597665	0	0	1.49636	1.04052	CIRBP
Measles	1/21	0.498891	0.597665	0	0	1.49636	1.04052	HIST1H1B
Cognitive disorder	2/52	0.504984	0.602941	0	0	1.19709	0.817882	PTN;VAT1L
Substance abuse	2/52	0.504984	0.602941	0	0	1.19709	0.817882	PNOC;RTN4
Nephroblastoma	1/22	0.515119	0.604987	0	0	1.42503	0.945307	BASP1
Anxiety disorder	1/22	0.515119	0.604987	0	0	1.42503	0.945307	GATA3
Chediak-Higashi syndrome	1/22	0.515119	0.604987	0	0	1.42503	0.945307	MYO5A
Cocaine dependence	1/22	0.515119	0.604987	0	0	1.42503	0.945307	CHRNA3
Congenital nystagmus	1/22	0.515119	0.604987	0	0	1.42503	0.945307	MSN
Schnyder corneal dystrophy	1/22	0.515119	0.604987	0	0	1.42503	0.945307	CLSTN1
Seasonal affective disorder	1/22	0.515119	0.604987	0	0	1.42503	0.945307	GATA3
Gaucher's disease	1/22	0.515119	0.604987	0	0	1.42503	0.945307	PSAP
VACTERL association	1/22	0.515119	0.604987	0	0	1.42503	0.945307	KIDINS220
Nicotine dependence	2/53	0.515171	0.604987	0	0	1.17355	0.778367	CHRNA3;ATP9A
Hyperinsulinism	2/54	0.525217	0.615772	0	0	1.15092	0.74113	IGFBP3;IGF2
Ameloblastoma	1/23	0.530822	0.616271	0	0	1.36019	0.861447	MMP9
Ankylosis	1/23	0.530822	0.616271	0	0	1.36019	0.861447	SPP1
Obstructive sleep apnea	1/23	0.530822	0.616271	0	0	1.36019	0.861447	APEX1
Omphalocele	1/23	0.530822	0.616271	0	0	1.36019	0.861447	IGF2
Polycythemia vera	1/23	0.530822	0.616271	0	0	1.36019	0.861447	CALR
Diphtheria	1/23	0.530822	0.616271	0	0	1.36019	0.861447	EEF2
Aniridia	1/24	0.546017	0.626779	0	0	1.30098	0.787231	IGF2
Corneal disease	1/24	0.546017	0.626779	0	0	1.30098	0.787231	TCF4
Echinococcosis	1/24	0.546017	0.626779	0	0	1.30098	0.787231	EEF1B2
Gastroesophageal reflux disease	1/24	0.546017	0.626779	0	0	1.30098	0.787231	ISLR2
Goiter	1/24	0.546017	0.626779	0	0	1.30098	0.787231	RET
Hypotrichosis	1/24	0.546017	0.626779	0	0	1.30098	0.787231	RPL21
Mastocytosis	1/24	0.546017	0.626779	0	0	1.30098	0.787231	CD63
Hydrocephalus	2/57	0.554503	0.635498	0	0	1.08798	0.641561	L1CAM;NES
Peripheral neuropathy	1/25	0.560721	0.638525	0	0	1.24671	0.721261	KIF1A
Primary biliary cirrhosis	1/25	0.560721	0.638525	0	0	1.24671	0.721261	RPL3
Collagen disease	1/25	0.560721	0.638525	0	0	1.24671	0.721261	IL1B
Lyme disease	1/25	0.560721	0.638525	0	0	1.24671	0.721261	YBX1
Vasculitis	2/58	0.563977	0.64121	0	0	1.06849	0.611971	IL1RN;IL1B
Polyhydramnios	1/26	0.57495	0.650263	0	0	1.19678	0.662385	MAGED2
Vesicoureteral reflux	1/26	0.57495	0.650263	0	0	1.19678	0.662385	MGEA5
Malaria	1/26	0.57495	0.650263	0	0	1.19678	0.662385	CDH13
Asthma	3/92	0.575583	0.650263	0	0	1.0083	0.556959	TOP2A;NDFIP1;NUCKS1
Autosomal dominant cerebellar ataxia	1/27	0.588718	0.660919	0	0	1.15069	0.609645	EEF2
Renal agenesis	1/27	0.588718	0.660919	0	0	1.15069	0.609645	RET
Synovitis	1/27	0.588718	0.660919	0	0	1.15069	0.609645	IL1B
Glycine encephalopathy	1/27	0.588718	0.660919	0	0	1.15069	0.609645	GARS
Congenital heart disease	2/62	0.600411	0.670604	0	0	0.997054	0.508638	HAND2;NSD1
Age related macular degeneration	1/28	0.602041	0.670604	0	0	1.10802	0.56224	MAP2
Congenital adrenal hyperplasia	1/28	0.602041	0.670604	0	0	1.10802	0.56224	HLA-B
maturity-onset diabetes of the young	1/28	0.602041	0.670604	0	0	1.10802	0.56224	FOXM1
Lipodystrophy	1/28	0.602041	0.670604	0	0	1.10802	0.56224	ZMPSTE24
Ocular albinism	1/29	0.614933	0.681773	0	0	1.06839	0.519495	NOLC1
Toxic shock syndrome	1/29	0.614933	0.681773	0	0	1.06839	0.519495	IL1B
Hepatocellular carcinoma	1/29	0.614933	0.681773	0	0	1.06839	0.519495	MAT2A
Parkinson's disease	3/99	0.625388	0.689183	0	0	0.934443	0.438612	NUCKS1;MAPT;GPM6B
Congenital hemolytic anemia	1/30	0.627408	0.689183	0	0	1.03149	0.48084	ALDOA
DOID:9917	1/30	0.627408	0.689183	0	0	1.03149	0.48084	CTNNB1
Specific language impairment	1/30	0.627408	0.689183	0	0	1.03149	0.48084	TRIM67
Uterine fibroid	1/30	0.627408	0.689183	0	0	1.03149	0.48084	S100A6
Hypopituitarism	1/30	0.627408	0.689183	0	0	1.03149	0.48084	SOX2
Eosinophilia	2/66	0.634504	0.695907	0	0	0.934545	0.425136	GATA3;HSPG2
Metabolic syndrome X	1/31	0.639479	0.696018	0	0	0.997059	0.445786	FADS2
Asphyxiating thoracic dystrophy	1/31	0.639479	0.696018	0	0	0.997059	0.445786	FOXM1
Bronchitis	1/31	0.639479	0.696018	0	0	0.997059	0.445786	IL1B
Calcinosis	1/31	0.639479	0.696018	0	0	0.997059	0.445786	SPP1
Fragile X syndrome	1/31	0.639479	0.696018	0	0	0.997059	0.445786	MAP1B
Cholestasis	2/67	0.642663	0.698419	0	0	0.920119	0.406817	IL1B;ENPP2
Type 2 diabetes mellitus	8/269	0.645013	0.699907	0	0	0.915799	0.401564	BTG1;SNRPN;IL1B;IGFBP3;CDH13;PROX1;NMNAT2;RPL6
Vaccinia	1/32	0.65116	0.705506	0	0	0.964846	0.413919	AHCY
Human immunodeficiency virus infectious disease	2/69	0.658549	0.712347	0	0	0.89256	0.372837	HLA-B;NCAM1
Otitis media	1/33	0.662463	0.712347	0	0	0.934646	0.384878	IL1B
Clubfoot	1/33	0.662463	0.712347	0	0	0.934646	0.384878	ZNF664
Sarcoma	1/33	0.662463	0.712347	0	0	0.934646	0.384878	KIDINS220
obsessive-compulsive disorder	1/33	0.662463	0.712347	0	0	0.934646	0.384878	RTN4
Prostate cancer	3/105	0.664771	0.713754	0	0	0.879202	0.358989	PKIA;ANK2;TBX3
Primary ciliary dyskinesia	1/34	0.6734	0.718696	0	0	0.906276	0.358355	CENPF
Retinal degeneration	1/34	0.6734	0.718696	0	0	0.906276	0.358355	NES
Disease of mental health	1/34	0.6734	0.718696	0	0	0.906276	0.358355	RPL9
Dyspepsia	1/34	0.6734	0.718696	0	0	0.906276	0.358355	SEPT3
Hyperglycemia	3/108	0.6833	0.726733	0	0	0.853949	0.325202	SCD;IL1B;FOXM1
Psoriasis	1/35	0.683984	0.726733	0	0	0.879576	0.334081	HLA-B
Pulmonary embolism	1/35	0.683984	0.726733	0	0	0.879576	0.334081	NONO
Bilirubin metabolic disorder	1/36	0.694225	0.736518	0	0	0.854401	0.311822	PKM
Congenital diaphragmatic hernia	1/38	0.713723	0.753844	0	0	0.808133	0.272551	SLIT3
Constipation	1/38	0.713723	0.753844	0	0	0.808133	0.272551	KIDINS220
Schistosomiasis	1/38	0.713723	0.753844	0	0	0.808133	0.272551	GAPDH
Rickets	1/39	0.723002	0.761392	0	0	0.786826	0.255202	SPP1
Keratitis	1/39	0.723002	0.761392	0	0	0.786826	0.255202	GDI1
Kidney failure	1/40	0.73198	0.767451	0	0	0.766611	0.239184	IGFBP3
Leishmaniasis	1/40	0.73198	0.767451	0	0	0.766611	0.239184	LONP1
Macular degeneration	1/40	0.73198	0.767451	0	0	0.766611	0.239184	IER3
Retinitis pigmentosa	2/83	0.754305	0.789698	0	0	0.737755	0.208016	SNRNP200;PRPF8
Pancreatitis	2/84	0.76017	0.794672	0	0	0.72872	0.199825	IL1B;HMGB1
Ptosis	1/44	0.76508	0.798636	0	0	0.695154	0.186145	PHOX2A
Amyotrophic lateral sclerosis	1/45	0.772697	0.805409	0	0	0.67932	0.175175	ARHGEF2
Nonsyndromic deafness	2/87	0.77704	0.808756	0	0	0.702891	0.177313	MYH9;ACTG1
Schizophrenia	3/126	0.778549	0.809147	0	0	0.728299	0.18231	CDC42;TCF4;PRRC2A
Atrial fibrillation	1/46	0.780066	0.809546	0	0	0.66419	0.164969	GAP43
Celiac disease	2/88	0.782429	0.810819	0	0	0.694682	0.170442	TMSB4X;ZFP36L1
Peripheral vascular disease	1/47	0.787198	0.814578	0	0	0.649717	0.155462	NRG4
Gilles de la Tourette syndrome	1/48	0.794098	0.82053	0	0	0.635861	0.146597	RTN4
Skin cancer	12/454	0.800999	0.826464	0	0	0.808537	0.179411	SYT4;CENPF;PTPRS;AHNAK;TUBB3;DNER;CTNNB1;ATP1A3;ANK2;TCF4;SLIT3;CHGB
Brachydactyly	1/50	0.807236	0.831697	0	0	0.609844	0.130592	GNAS
Heart disease	2/94	0.812415	0.835726	0	0	0.649174	0.134862	RPL3;PKIA
Metabolic acidosis	1/51	0.813487	0.835726	0	0	0.597616	0.123363	RPS21
Atherosclerosis	1/52	0.819536	0.840731	0	0	0.585868	0.116597	CELSR2
Amenorrhea	1/53	0.825389	0.844309	0	0	0.574571	0.11026	RPL24
Polycystic kidney disease	1/53	0.825389	0.844309	0	0	0.574571	0.11026	CTNNB1
Cone dystrophy	1/54	0.831053	0.848887	0	0	0.563701	0.10432	PRPF8
Cryptorchidism	1/58	0.851931	0.86897	0	0	0.524035	0.0839761	CIRBP
Pneumonia	1/64	0.878519	0.894811	0	0	0.473979	0.0613888	MMP9
Neutropenia	1/72	0.906704	0.920947	0	0	0.420399	0.0411736	HN1
Crohn's disease	5/248	0.906759	0.920947	0	0	0.612476	0.0599484	NDFIP1;ZMIZ1;KIF21B;YWHAZ;RHOA
Myopia	1/75	0.915499	0.928503	0	0	0.403293	0.035605	FLNA
Acquired immunodeficiency syndrome	1/78	0.923467	0.935256	0	0	0.38752	0.0308545	HLA-B
Blindness	1/81	0.930684	0.94123	0	0	0.37293	0.0267896	PPT1
Systemic lupus erythematosus	1/83	0.935114	0.944372	0	0	0.363796	0.024406	NMNAT2
Melanoma	11/505	0.93881	0.946766	0	0	0.660279	0.0416914	SYT4;PTPRS;LRP1;PARP1;DNER;CTNNB1;ANK2;TCF4;SLIT3;SF3B1;CHGB
Polydactyly	1/92	0.9518	0.958512	0	0	0.327663	0.0161868	HAND2
Azoospermia	1/96	0.957767	0.963163	0	0	0.313802	0.0135408	RBMX
Influenza	1/99	0.961753	0.965811	0	0	0.304148	0.0118611	IL1B
Obesity	1/103	0.966489	0.969204	0	0	0.29216	0.00995827	ENPP2
Infertility	2/163	0.970141	0.971501	0	0	0.369628	0.011205	IL1B;HSPD1
Carcinoma	336/11318	0.993114	0.993114	0	0	0.823521	0.00568998	RPL5;APP;SPARC;CCNI;HNRNPU;ENO2;FNBP1L;EPRS;MKI67;DCAF7;ACTB;SOX2;ALCAM;TRIM28;ZMIZ1;DPYSL5;PPP2R1A;DPYSL2;DPYSL3;BSG;LONP1;UBAP2L;KIF21B;B2M;CHGB;WLS;DDX17;SRRM2;UNC5B;CACNA2D1;ACTN1;ISLR2;UNC5C;SOX11;ANK2;EBF3;HLA-A;ACTN4;HSPG2;EML4;RUFY3;MAP1B;TRIB3;SF1;GPM6A;TTYH3;RPN2;PRKDC;SHMT2;TTYH1;MAGED1;STXBP1;FOXG1;SDC2;SDC3;NOLC1;GATA3;GATA2;MTDH;ZMPSTE24;LDHB;ATP5B;LARP1;MAP2;STC2;MAP6;TNRC18;MAP4;S…

## Sheet: Allen Brain Atlas up
Term	Overlap	P-value	Adjusted P-value	Old P-value	Old Adjusted P-value	Odds Ratio	Combined Score	Genes
Paraventricular hypothalamic nucleus	36/301	1.44352e-11	1.04896e-08	0	0	4.244	105.936	GPM6A;RPL10;SDC2;USP11;HMP19;DCAF7;GNAI2;SOX2;FADS2;RGS5;PGRMC1;PCSK1N;PEG10;NNAT;RPS3;RPL35;RPS2;RPS12;RPL19;VAT1;CADM1;HSPA5;RPS8;USP22;SURF4;LAPTM5;HUWE1;L1CAM;DLK1;GAP43;GAL;CANX;TRIB3;HYOU1;FXYD6;SCG2
Paraventricular hypothalamic nucleus, parvicellular division, anterior parvicellular part	36/301	1.44352e-11	1.04896e-08	0	0	4.244	105.936	GPM6A;RPL30;RPL10;SHC1;SDC2;USP11;SDC3;HMP19;DCAF7;GNAI2;SOX2;FADS2;PGRMC1;PCSK1N;PEG10;NNAT;RPS3;RPL35;RPL13;RPS12;VAT1;MARCKSL1;CADM1;HSPA5;USP22;SURF4;HUWE1;L1CAM;DLK1;GAP43;GAL;ID4;TRIB3;HYOU1;FXYD6;SCG2
paraventricular nucleus, dorsal part	36/301	1.44352e-11	1.04896e-08	0	0	4.244	105.936	RPN2;RPL10;SHC1;SDC2;USP11;SDC3;DCAF7;GNAI2;SOX2;FADS2;PGRMC1;PCSK1N;CDH2;PEG10;NNAT;RPS3;RPL35;RPL13;NCAM1;RPS2;RPS12;RPL19;VAT1;CADM1;HSPA5;SURF4;HUWE1;L1CAM;DLK1;GAP43;GAL;ID4;TRIB3;HYOU1;FXYD6;SCG2
Paraventricular hypothalamic nucleus, parvicellular division	35/301	6.15283e-11	3.35329e-08	0	0	4.10367	96.4836	GPM6A;RPL10;SDC2;USP11;HMP19;DCAF7;GNAI2;SOX2;FADS2;PGRMC1;PCSK1N;PEG10;NNAT;RPS3;RPL35;RPS2;RPS12;RPL19;VAT1;CADM1;HSPA5;RPS8;USP22;SURF4;LAPTM5;HUWE1;L1CAM;DLK1;GAP43;GAL;CANX;TRIB3;HYOU1;FXYD6;SCG2
periventricular stratum of PO2	34/301	2.53751e-10	1.10635e-07	0	0	3.96481	87.6011	RPL5;RPN2;MAGED1;SDC2;RGS16;USP11;GNAI2;EEF1B2;PGRMC1;PCSK1N;RPS19;PEG10;NNAT;RPL14;RPS2;VAT1L;RPS12;RPL19;VAT1;MARCKSL1;CADM1;RPS7;SURF4;APLP1;PBX1;DLK1;GAL;PNOC;CANX;HNRNPD;MAGED2;FXYD6;RPS21;SCG2
Medial preoptic nucleus	40/410	5.74239e-10	2.0864e-07	0	0	3.38092	71.9391	RPN2;MAGED1;SDC2;RGS16;USP11;GNAI2;RPS15;EEF1B2;PGRMC1;PCSK1N;IPO9;RPS19;PEG10;NNAT;DNER;RPL14;RPS11;RPL19;RPS12;VAT1;MARCKSL1;FCER1G;CADM1;RPS7;SURF4;APLP1;PBX1;DLK1;EEF1A1;SFPQ;GAL;VGF;PNOC;CANX;HNRNPD;GNAS;FXYD6;MAGED2;RPS21;SCG2
lower dorsal lateral hypothalamic area	33/301	1.01182e-09	3.15109e-07	0	0	3.82739	79.2711	CD63;CD81;USP11;FOXM1;GNAI2;PCSK1N;DPYSL2;PEG10;NNAT;NCAM1;RPS27A;AP2M1;RPS12;VAT1;RPS8;IGF2;RPL13A;RPL35A;DLK1;RPS25;GAL;PKIA;PNOC;RPL37A;MAGED2;FXYD6;TMBIM6;EVL;MAPT;SCG2;PFDN5;RPS24;RPS23
Paraventricular hypothalamic nucleus, magnocellular division	32/301	3.89783e-09	7.08105e-07	0	0	3.69141	71.4762	RPL30;RPL10;USP11;SLC7A1;GNAI2;FADS2;RGS5;PGRMC1;PCSK1N;IPO9;RPS19;DPYSL5;PEG10;NNAT;RPL14;RPL35;RPS2;RPS11;RPS12;RPL19;CADM1;HSPA5;RPL23;SURF4;HUWE1;DLK1;SLC7A5;CANX;ID4;HYOU1;FXYD6;SCG2
Paraventricular hypothalamic nucleus, magnocellular division, posterior magnocellular part	32/301	3.89783e-09	7.08105e-07	0	0	3.69141	71.4762	RPL4;RPL10;SLC7A1;GNAI2;FADS2;RGS5;PGRMC1;PCSK1N;IPO9;RPS19;DPYSL5;PEG10;NNAT;RPL14;RPL35;RPS2;RPS11;RPS12;RPL19;CADM1;HSPA5;RPL23;SURF4;LAPTM5;HUWE1;DLK1;SLC7A5;MORF4L1;CANX;HYOU1;FXYD6;SCG2
Paraventricular hypothalamic nucleus, magnocellular division, posterior magnocellular part, lateral zone	32/301	3.89783e-09	7.08105e-07	0	0	3.69141	71.4762	RPL4;RPL10;SLC7A1;GNAI2;FADS2;RGS5;PGRMC1;PCSK1N;IPO9;RPS19;DPYSL5;PEG10;NNAT;RPL14;RPL35;RPS2;RPS11;RPS12;RPL19;CADM1;HSPA5;RPL23;SURF4;LAPTM5;HUWE1;DLK1;SLC7A5;MORF4L1;CANX;HYOU1;FXYD6;SCG2
Paraventricular hypothalamic nucleus, parvicellular division, medial parvicellular part, dorsal zone	32/301	3.89783e-09	7.08105e-07	0	0	3.69141	71.4762	AHCY;RPL10;DCAF7;GNAI2;FADS2;RGS5;PGRMC1;PCSK1N;PEG10;NNAT;RPS3;RPL35;SNCG;NCAM1;RPS2;RPS11;VAT1L;RPS12;RPL19;VAT1;CADM1;SURF4;LAPTM5;HUWE1;DLK1;SLC7A5;GAP43;GAL;CANX;HYOU1;FXYD6;SCG2
paraventricular nucleus, cap part	32/301	3.89783e-09	7.08105e-07	0	0	3.69141	71.4762	RPL30;RPL10;CD81;SHC1;GNAI2;FADS2;RGS5;PGRMC1;PCSK1N;PEG10;NNAT;RPL14;RPS2;RPS11;VAT1L;RPS12;RPL19;CADM1;HSPA5;RPS8;SURF4;LAPTM5;HUWE1;DLK1;SLC7A5;MORF4L1;GAP43;GAL;CANX;HYOU1;FXYD6;SCG2
Paraventricular hypothalamic nucleus, magnocellular division, medial magnocellular part	31/301	1.44948e-08	2.43067e-06	0	0	3.55684	64.199	RPL30;RPL10;USP11;GNAI2;FADS2;RGS5;PGRMC1;PCSK1N;IPO9;RPS19;PEG10;NNAT;RPL14;RPL35;RPS2;RPS12;RPL19;CADM1;HSPA5;RPL23;SURF4;HUWE1;DLK1;EEF1A1;SLC7A5;CANX;RPL37A;ID4;HYOU1;FXYD6;SCG2
dorsal tuberomammillary nucleus, intermediate part (histaminergic)	30/301	5.19875e-08	6.29626e-06	0	0	3.42366	57.4225	RPN2;SDC2;DCAF7;GNAI2;SOX2;PGRMC1;PCSK1N;YWHAQ;DPYSL5;PEG10;NNAT;TIMP1;RPS11;VAT1L;RPS12;H2AFY;RPS8;CACNA2D1;USP22;HUWE1;EBF3;SOX11;DLK1;EEF1G;RPS25;GAL;HYOU1;FXYD6;VIM;SCG2
intermediate stratum of PHyB-V	30/301	5.19875e-08	6.29626e-06	0	0	3.42366	57.4225	RPN2;SDC2;DCAF7;GNAI2;SOX2;PGRMC1;PCSK1N;YWHAQ;DPYSL5;PEG10;NNAT;TIMP1;RPS11;VAT1L;RPS12;H2AFY;RPS8;CACNA2D1;USP22;HUWE1;EBF3;SOX11;DLK1;EEF1G;RPS25;GAL;HYOU1;FXYD6;VIM;SCG2
paraventricular nucleus, peduncular or principal part	30/301	5.19875e-08	6.29626e-06	0	0	3.42366	57.4225	RPL10;SHC1;SDC2;USP11;HMP19;DCAF7;GNAI2;SOX2;FADS2;RGS5;PGRMC1;PCSK1N;PEG10;NNAT;RPS2;VAT1L;RPS12;RPL19;VAT1;CADM1;HSPA5;SURF4;HUWE1;DLK1;GAP43;GAL;CANX;HYOU1;FXYD6;SCG2
paraventricular nucleus, rostral part	30/301	5.19875e-08	6.29626e-06	0	0	3.42366	57.4225	RPL31;SDC2;USP11;GNAI2;FADS2;RGS5;PGRMC1;PCSK1N;DPYSL5;PEG10;NNAT;SNCG;RPS2;RPS11;VAT1L;RPS12;RPL19;VAT1;SYT4;CADM1;SURF4;LAPTM5;HUWE1;DLK1;GAP43;GAL;CANX;HYOU1;FXYD6;SCG2
periventricular stratum of PPaA	30/301	5.19875e-08	6.29626e-06	0	0	3.42366	57.4225	RPL10;SHC1;SDC2;USP11;HMP19;DCAF7;GNAI2;SOX2;FADS2;RGS5;PGRMC1;PCSK1N;PEG10;NNAT;RPS2;VAT1L;RPS12;RPL19;VAT1;CADM1;HSPA5;SURF4;HUWE1;DLK1;GAP43;GAL;CANX;HYOU1;FXYD6;SCG2
Bed nuclei of the stria terminalis, anterior division, magnocellular nucleus	29/301	1.79673e-07	2.06151e-05	0	0	3.29186	51.1296	MAGED1;SDC2;USP11;GNAI2;RPS15;PCSK1N;RPS19;PEG10;DNER;NNAT;RPL14;NCAM1;RPS27A;RPS12;VAT1;CADM1;RPS7;APLP1;CIRBP;RPL13A;PBX1;GAP43;GAL;PNOC;FXYD6;MAPT;RPS21;PFDN5;RPS24
Bed nuclei of the stria terminalis, anterior division, dorsomedial nucleus	28/301	5.97788e-07	5.42991e-05	0	0	3.16143	45.3033	RPL10;MAGED1;SDC2;USP11;GNAI2;EEF1B2;FADS2;PGRMC1;PEG10;PEA15;NNAT;RPL14;RPL13;RPS27A;RPS12;VAT1;HSBP1;CIRBP;DLK1;GAP43;GAL;IL1B;PNOC;FXYD6;RPS21;PFDN5;VAMP2;XPR1
Dorsomedial nucleus of the hypothalamus, anterior part	28/301	5.97788e-07	5.42991e-05	0	0	3.16143	45.3033	RPL10;RPL31;SDC2;DCAF7;GNAI2;SOX2;PGRMC1;PCSK1N;PEG10;NNAT;TIMP1;RPS11;VAT1L;RPS12;VAT1;RPS8;USP22;SURF4;APLP1;HUWE1;SOX11;DLK1;GAL;HYOU1;FXYD6;VIM;SCG2;PFDN5
Posterior hypothalamic nucleus	28/301	5.97788e-07	5.42991e-05	0	0	3.16143	45.3033	RET;RAB3C;CD81;SDC2;DCAF7;PGRMC1;PCSK1N;IPO9;DPYSL5;DNER;NCAM1;TIMP1;VAT1L;H2AFY;RPS8;CACNA2D1;USP22;IGF2;HUWE1;EBF3;SOX11;DLK1;RPL37A;FXYD6;MAPT;SCG2;PFDN5;RPS24
periventricular stratum of PO1	28/301	5.97788e-07	5.42991e-05	0	0	3.16143	45.3033	RPN2;RPL10;MAGED1;SDC2;RGS16;USP11;DCAF7;GNAI2;PGRMC1;PEG10;DNER;NNAT;RPS12;VAT1;SYT4;MARCKSL1;CADM1;RPS7;PBX1;DLK1;GAP43;GAL;PNOC;TRIB3;HYOU1;FXYD6;RPS21;SCG2
preoptic area	28/301	5.97788e-07	5.42991e-05	0	0	3.16143	45.3033	RPN2;MAGED1;SDC2;RGS16;USP11;GNAI2;RPS15;EEF1B2;PGRMC1;PCSK1N;PEG10;DNER;NNAT;VAT1L;RPS12;VAT1;MARCKSL1;CADM1;RPS7;PBX1;DLK1;GAL;NRG4;PNOC;MAGED2;FXYD6;RPS21;SCG2
Bed nuclei of the stria terminalis, posterior division, interfascicular nucleus	27/301	1.9127e-06	0.000148917	0	0	3.03233	39.9267	MAGED1;SDC2;USP11;GNAI2;RPS15;EEF1B2;PGRMC1;PCSK1N;PEG10;PEA15;NNAT;NCAM1;RPS27A;SOX4;VAT1;CADM1;NR2F1;RPL13A;DLK1;GAP43;GAL;PNOC;FXYD6;MAPT;RPS21;XPR1;RPS23
Medial preoptic nucleus, medial part	27/301	1.9127e-06	0.000148917	0	0	3.03233	39.9267	MAGED1;SDC2;RGS16;SOX2;PCSK1N;RPS16;IPO9;DPYSL5;PEG10;NNAT;RPS11;RPS12;RPL19;MARCKSL1;FCER1G;CADM1;RPS7;SURF4;PBX1;DLK1;EEF1A1;SFPQ;GAL;CANX;GNAS;FXYD6;SCG2
Posterodorsal preoptic nucleus	27/301	1.9127e-06	0.000148917	0	0	3.03233	39.9267	MAGED1;SDC2;USP11;PGRMC1;PCSK1N;IPO9;RPS19;PEG10;PEA15;DNER;NNAT;RPL14;RPL13;RPS27A;RPS12;CADM1;SURF4;APLP1;RPL13A;PBX1;GAP43;GAL;PNOC;FXYD6;SCG2;PFDN5;XPR1
intermediate stratum of PHyB-D	27/301	1.9127e-06	0.000148917	0	0	3.03233	39.9267	RPN2;SDC2;USP11;GNAI2;RPS15;PGRMC1;PCSK1N;PEG10;ARHGDIA;DNER;NNAT;VAT1L;RPS12;VAT1;RPS7;APLP1;IGF2;RPL35A;DLK1;RPS25;GAL;HNRNPD;MAGED2;FXYD6;TMBIM6;SCG2;PFDN5
Anterodorsal preoptic nucleus	26/301	5.87911e-06	0.000298057	0	0	2.90457	34.983	RTN1;RPL10;MAGED1;USP11;GNAI2;EEF1B2;PGRMC1;IPO9;PEG10;PEA15;DNER;NNAT;RPL13;RPS12;VAT1;SYT4;CADM1;RPL23;DLK1;GAP43;GAL;PNOC;TRIB3;HYOU1;FXYD6;SCG2
Bed nuclei of the stria terminalis, posterior division, transverse nucleus	26/301	5.87911e-06	0.000298057	0	0	2.90457	34.983	SET;USP11;GNAI2;RPS15;EEF1B2;PGRMC1;PCSK1N;PEG10;PEA15;NCAM1;SOX4;VAT1L;VAT1;CADM1;NR2F1;PLAUR;RPL13A;RPL35A;GAL;PNOC;TTC3;CTNNB1;FXYD6;RPS21;PFDN5;XPR1
Dopaminergic A13 group	26/301	5.87911e-06	0.000298057	0	0	2.90457	34.983	RPL31;USP11;GNAI2;FADS2;PGRMC1;PCSK1N;DPYSL2;NNAT;RPL14;RPL13;RPS11;RPS27A;RPS12;RPS8;SARS;RPL13A;L1CAM;GAP43;GAL;PNOC;CANX;FXYD6;MAPT;SCG2;PFDN5;XPR1
dorsal septopreoptic nucleus	26/301	5.87911e-06	0.000298057	0	0	2.90457	34.983	RPN2;RPL10;MAGED1;SDC2;USP11;DCAF7;GNAI2;PGRMC1;PEG10;DNER;NNAT;RPS12;VAT1;SYT4;CADM1;PBX1;DLK1;GAP43;GAL;PNOC;CANX;TRIB3;HYOU1;FXYD6;RPS21;SCG2
intermediate stratum of PSPa	26/301	5.87911e-06	0.000298057	0	0	2.90457	34.983	RPN2;CD81;SDC2;USP11;GNAI2;RPS15;PGRMC1;PCSK1N;PEG10;NNAT;NCAM1;RPS27A;VAT1L;RPS12;VAT1;IGF2;RPL35A;DLK1;RPS25;GAL;MAGED2;FXYD6;TMBIM6;MAPT;SCG2;PFDN5
mantle zone of PO2	26/301	5.87911e-06	0.000298057	0	0	2.90457	34.983	RPN2;SDC2;RGS16;USP11;GNAI2;RPS15;EEF1B2;PCSK1N;RPS19;PEG10;NNAT;VAT1L;RPS12;RPL19;VAT1;MARCKSL1;CADM1;RPS7;PBX1;DLK1;GAL;PNOC;MAGED2;FXYD6;RPS21;SCG2
mantle zone of PSPa	26/301	5.87911e-06	0.000298057	0	0	2.90457	34.983	RPN2;CD81;SDC2;USP11;GNAI2;RPS15;PCSK1N;PEG10;NNAT;NCAM1;VAT1L;VAT1;SYT4;IGF2;RPL35A;DLK1;RPS25;GAL;PNOC;MAGED2;FXYD6;TMBIM6;MAPT;RPS21;SCG2;PFDN5
medial part of MPO	26/301	5.87911e-06	0.000298057	0	0	2.90457	34.983	MAGED1;SDC2;RGS16;USP11;PGRMC1;PCSK1N;IPO9;RPS19;PEG10;NNAT;RPL14;RPS2;RPS12;RPL19;MARCKSL1;CADM1;RPS7;RPL23;SURF4;PBX1;DLK1;GAL;CANX;GNAS;FXYD6;SCG2
peduncular part of dorsomedial hypothalamic nucleus	26/301	5.87911e-06	0.000298057	0	0	2.90457	34.983	RPN2;SDC2;DCAF7;GNAI2;SOX2;PGRMC1;PCSK1N;RPS19;CDH2;PEG10;NNAT;TIMP1;RPS12;RPS8;USP22;SURF4;HUWE1;SOX11;DLK1;GAL;RPL37A;HYOU1;FXYD6;VIM;SCG2;PFDN5
posterior part of anterior hypothalamic nucleus	26/301	5.87911e-06	0.000298057	0	0	2.90457	34.983	RPL31;SDC2;USP11;GNAI2;PGRMC1;PCSK1N;DPYSL5;PEG10;NNAT;SNCG;TIMP1;RPS11;VAT1L;RPS12;VAT1;HSP90AA1;RPS8;HUWE1;DLK1;EEF1G;GAP43;GAL;HYOU1;FXYD6;SCG2;PFDN5
preoptic alar plate	26/301	5.87911e-06	0.000298057	0	0	2.90457	34.983	RPN2;SDC2;RGS16;USP11;GNAI2;RPS15;EEF1B2;PCSK1N;PEG10;NNAT;VAT1L;RPS12;VAT1;MARCKSL1;CADM1;RPS7;PBX1;DLK1;GAL;NRG4;PNOC;MAGED2;FXYD6;UBA1;RPS21;SCG2
preoptic telencephalon	26/301	5.87911e-06	0.000298057	0	0	2.90457	34.983	RPN2;SDC2;RGS16;USP11;GNAI2;RPS15;EEF1B2;PCSK1N;PEG10;NNAT;VAT1L;RPS12;VAT1;MARCKSL1;CADM1;RPS7;PBX1;DLK1;GAL;NRG4;PNOC;MAGED2;FXYD6;UBA1;RPS21;SCG2
second (ventral) preoptic domain	26/301	5.87911e-06	0.000298057	0	0	2.90457	34.983	RPN2;SDC2;RGS16;USP11;GNAI2;RPS15;EEF1B2;PCSK1N;RPS19;PEG10;NNAT;VAT1L;RPS12;RPL19;VAT1;MARCKSL1;CADM1;RPS7;PBX1;DLK1;GAL;PNOC;MAGED2;FXYD6;RPS21;SCG2
shell of P-DMH	26/301	5.87911e-06	0.000298057	0	0	2.90457	34.983	RPN2;SDC2;GNAI2;PGRMC1;PCSK1N;IPO9;RPS19;CDH2;PEG10;NNAT;TIMP1;RPS27A;RPS12;RPS8;CACNA2D1;USP22;SURF4;HUWE1;SOX11;DLK1;GAL;RPL37A;HYOU1;FXYD6;SCG2;PFDN5
upper dorsal perifornical nucleus	26/301	5.87911e-06	0.000298057	0	0	2.90457	34.983	GPM6A;SHC1;USP11;GNAI2;RPS15;EEF1B2;PGRMC1;PCSK1N;DPYSL2;PEG10;NNAT;NCAM1;AP2M1;VAT1L;VAT1;SYT4;CADM1;DLK1;EEF1G;GAL;PNOC;HNRNPD;FXYD6;TMBIM6;MAPT;RPS21
Bed nuclei of the stria terminalis, posterior division, principal nucleus	25/301	1.73398e-05	0.000687285	0	0	2.77812	30.4551	USP11;GNAI2;SOX2;EEF1B2;PGRMC1;PEG10;PEA15;NNAT;RPS3;RPS2;SOX4;CADM1;HSBP1;DLK1;EEF1A1;GAP43;GAL;PNOC;ID4;FXYD6;RPS21;SCG2;VAMP2;DBN1;XPR1
Medial preoptic area	25/301	1.73398e-05	0.000687285	0	0	2.77812	30.4551	RPL10;MAGED1;SDC2;USP11;GNAI2;PGRMC1;PCSK1N;PEG10;DNER;NNAT;RPS12;VAT1;MARCKSL1;CADM1;RPS7;PBX1;DLK1;EEF1A1;RPS25;GAL;PNOC;CANX;FXYD6;RPS21;SCG2
Paraventricular hypothalamic nucleus, descending division	25/301	1.73398e-05	0.000687285	0	0	2.77812	30.4551	RPL30;USP11;GNAI2;FADS2;PGRMC1;PCSK1N;DPYSL2;NNAT;RPL14;RPL13;RPS11;RPS27A;RPS12;SARS;RPL13A;L1CAM;GAP43;GAL;PNOC;CANX;FXYD6;MAPT;RPS21;PFDN5;XPR1
Periventricular region	25/301	1.73398e-05	0.000687285	0	0	2.77812	30.4551	CD63;SDC2;USP11;GNAI2;PGRMC1;PCSK1N;PEG10;NNAT;TIMP1;VAT1L;RPS12;RPL19;VAT1;MARCKSL1;CADM1;SURF4;SOX11;PBX1;DLK1;RPS25;GAL;PNOC;FXYD6;RPS21;SCG2
core of P-DMH	25/301	1.73398e-05	0.000687285	0	0	2.77812	30.4551	GRN;NLGN2;RPN2;RPL10;SDC2;DCAF7;GNAI2;SOX2;PGRMC1;PCSK1N;CDH2;PEG10;NNAT;TIMP1;RPS12;USP22;SURF4;HUWE1;SOX11;DLK1;GAL;HYOU1;FXYD6;VIM;SCG2
dorsal part of PHyB	25/301	1.73398e-05	0.000687285	0	0	2.77812	30.4551	RPN2;SDC2;USP11;GNAI2;RPS15;PGRMC1;PCSK1N;PEG10;NNAT;NCAM1;VAT1L;RPS12;VAT1;RPS7;IGF2;RPL35A;DLK1;RPS25;GAL;MAGED2;FXYD6;TMBIM6;RPS21;SCG2;PFDN5
mantle zone of PHyB-D	25/301	1.73398e-05	0.000687285	0	0	2.77812	30.4551	RPN2;SDC2;USP11;GNAI2;RPS15;PGRMC1;PCSK1N;PEG10;NNAT;NCAM1;VAT1L;RPS12;VAT1;RPS7;IGF2;RPL35A;DLK1;RPS25;GAL;MAGED2;FXYD6;TMBIM6;RPS21;SCG2;PFDN5
mantle zone of PPaA	25/301	1.73398e-05	0.000687285	0	0	2.77812	30.4551	RPN2;SHC1;USP11;RPL11;GNAI2;RPS15;EEF1B2;PGRMC1;PCSK1N;PEG10;NNAT;RPS3;NCAM1;VAT1L;VAT1;SYT4;CADM1;DLK1;EEF1G;GAL;PNOC;FXYD6;TMBIM6;RPS21;SCG2
peduncular paraventricular area of PHyA	25/301	1.73398e-05	0.000687285	0	0	2.77812	30.4551	RPN2;SHC1;USP11;RPL11;GNAI2;RPS15;EEF1B2;PGRMC1;PCSK1N;PEG10;NNAT;RPS3;NCAM1;VAT1L;VAT1;SYT4;CADM1;DLK1;EEF1G;GAL;PNOC;FXYD6;TMBIM6;RPS21;SCG2
peduncular subparaventricular area	25/301	1.73398e-05	0.000687285	0	0	2.77812	30.4551	RPN2;CD81;SDC2;USP11;GNAI2;RPS15;PCSK1N;PEG10;NNAT;NCAM1;VAT1L;VAT1;SYT4;IGF2;RPL35A;DLK1;RPS25;GAL;MAGED2;FXYD6;TMBIM6;MAPT;RPS21;SCG2;PFDN5
terminal nucleus of the stria medullaris	25/301	1.73398e-05	0.000687285	0	0	2.77812	30.4551	SDC2;USP11;GNAI2;EEF1B2;PGRMC1;PCSK1N;IPO9;PEG10;NNAT;NCAM1;CCT7;VAT1;SYT4;MARCKSL1;CADM1;SURF4;DLK1;GAL;PNOC;CANX;FXYD6;RPS21;SCG2;XPR1;RPS23
upper basal perifornical nucleus	25/301	1.73398e-05	0.000687285	0	0	2.77812	30.4551	RPN2;MAGED1;SDC2;TARS;GNAI2;RPS15;PCSK1N;PEG10;ARHGDIA;DNER;NNAT;RPL14;RPS27A;VAT1L;RPS12;VAT1;CADM1;RPS7;APLP1;RPL35A;SOX11;GAL;HNRNPD;SCG2;PFDN5
Dorsomedial nucleus of the hypothalamus	24/301	4.90133e-05	0.00161892	0	0	2.65296	26.3264	VAT1;SDC2;USP22;CRABP1;SURF4;HUWE1;SOX11;DLK1;GNAI2;SOX2;PGRMC1;PCSK1N;GAL;RPS19;CDH2;PEG10;NNAT;HYOU1;FXYD6;TIMP1;VIM;SCG2;PFDN5;RPS12
Paraventricular hypothalamic nucleus, descending division, lateral parvicellular part	24/301	4.90133e-05	0.00161892	0	0	2.65296	26.3264	RPL30;USP11;SARS;RPL13A;L1CAM;GNAI2;FADS2;PGRMC1;PCSK1N;GAP43;GAL;DPYSL2;CANX;NNAT;RPL14;RPL13;FXYD6;MAPT;RPS11;RPS27A;RPS21;PFDN5;XPR1;RPS12
alar part of peduncular hypothalamus	24/301	4.90133e-05	0.00161892	0	0	2.65296	26.3264	VAT1;RPN2;CD81;USP11;RPL11;IGF2;DLK1;GNAI2;RPS15;EEF1B2;EEF1G;PGRMC1;GAL;PEG10;PNOC;NNAT;RPS3;FXYD6;TMBIM6;NCAM1;RPS21;SCG2;VAT1L;RPS12
core of T-DMH	24/301	4.90133e-05	0.00161892	0	0	2.65296	26.3264	CD63;GRN;MARCKSL1;SDC2;CRABP1;SURF4;HUWE1;TARS;MSN;STMN4;SOX11;MKI67;SLC7A1;GNAI2;PCSK1N;GAL;TRIM28;CDH2;PEG10;GNAS;RPS2;VIM;RPS12;RPL19
dorsomedial preoptic area, intermediate part	24/301	4.90133e-05	0.00161892	0	0	2.65296	26.3264	VAT1;CADM1;RPS7;MAGED1;SDC2;USP11;CIRBP;PBX1;GNAI2;RPS15;GAP43;GAL;NRG4;PEG10;PNOC;DNER;NNAT;HNRNPD;FXYD6;RPS27A;CCT7;RPS21;VAT1L;RPS12
first (dorsal) preoptic domain	24/301	4.90133e-05	0.00161892	0	0	2.65296	26.3264	VAT1;SLC10A4;MARCKSL1;CADM1;RPS7;MAGED1;SDC2;USP11;PBX1;DLK1;GNAI2;RPS15;GAL;NRG4;PEG10;PNOC;DNER;NNAT;MAGED2;FXYD6;RPS21;SCG2;VAT1L;RPS12
lateral part of MPO	24/301	4.90133e-05	0.00161892	0	0	2.65296	26.3264	VAT1;CADM1;MAGED1;SDC2;USP11;CIRBP;RPL13A;PBX1;RPS15;EEF1B2;PGRMC1;PCSK1N;GAL;RPS19;PEG10;PNOC;NNAT;HNRNPD;RPL14;FXYD6;RPS21;SCG2;RPS12;RPS23
mantle zone of PO1	24/301	4.90133e-05	0.00161892	0	0	2.65296	26.3264	VAT1;SLC10A4;MARCKSL1;CADM1;RPS7;MAGED1;SDC2;USP11;PBX1;DLK1;GNAI2;RPS15;GAL;NRG4;PEG10;PNOC;DNER;NNAT;MAGED2;FXYD6;RPS21;SCG2;VAT1L;RPS12
periventricular stratum of p3ZL	24/301	4.90133e-05	0.00161892	0	0	2.65296	26.3264	RAB3C;RPL10;RPS8;SHC1;USP22;LAPTM5;HUWE1;L1CAM;DCAF7;DLK1;GNAI2;SOX2;EEF1G;FADS2;PGRMC1;GAP43;DPYSL5;CANX;HYOU1;FXYD6;EVL;AGRN;SCG2;PFDN5
posterobasal nucleus, intermediate part	24/301	4.90133e-05	0.00161892	0	0	2.65296	26.3264	VAT1;RPN2;RPL10;RPS7;SDC2;USP11;APLP1;DLK1;GNAI2;RPS15;RPS25;PGRMC1;PCSK1N;GAL;PEG10;DNER;NNAT;FXYD6;TMBIM6;TIMP1;SCG2;PFDN5;VAT1L;RPS12
retrohypothalamic nucleus	24/301	4.90133e-05	0.00161892	0	0	2.65296	26.3264	RAB3C;RPL10;HSPA5;SHC1;USP22;HUWE1;L1CAM;DLK1;GNAI2;SOX2;FADS2;MORF4L1;PGRMC1;GAP43;GAL;IPO9;CDH2;DPYSL5;ID4;HYOU1;FXYD6;TIMP1;AGRN;SCG2
Bed nuclei of the stria terminalis, anterior division, anteromedial area	23/301	0.000132606	0.00401502	0	0	2.52908	22.58	SYT4;CADM1;USP11;CRABP1;DLK1;GNAI2;SOX2;EEF1B2;PGRMC1;GAP43;GAL;PEG10;PNOC;PEA15;CDC42EP3;NNAT;S100A6;DCX;RPS2;RPS21;VAMP2;DBN1;XPR1
Dorsomedial nucleus of the hypothalamus, posterior part	23/301	0.000132606	0.00401502	0	0	2.52908	22.58	VAT1;NTRK2;SDC2;USP22;SURF4;HUWE1;SOX11;DLK1;GNAI2;SOX2;PGRMC1;PCSK1N;GAL;RPS19;CDH2;PEG10;NNAT;FXYD6;TIMP1;VIM;SCG2;PFDN5;RPS12
intermediate stratum of PHyB-I	23/301	0.000132606	0.00401502	0	0	2.52908	22.58	VAT1;RPN2;CD81;SDC2;SURF4;IGF2;SOX11;DLK1;GNAI2;PGRMC1;PCSK1N;GAL;CDH2;PEG10;DNER;RPL37A;NNAT;FXYD6;TIMP1;SCG2;PFDN5;RPS12;RPS23
periventricular stratum of RtC	23/301	0.000132606	0.00401502	0	0	2.52908	22.58	RAB3C;RPL10;HSPA5;SHC1;USP22;HUWE1;L1CAM;DLK1;GNAI2;SOX2;FADS2;MORF4L1;PGRMC1;GAP43;GAL;IPO9;CDH2;DPYSL5;ID4;HYOU1;FXYD6;TIMP1;AGRN
shell of p3ZL	23/301	0.000132606	0.00401502	0	0	2.52908	22.58	RAB3C;RPL10;RPS8;SHC1;USP22;LAPTM5;HUWE1;L1CAM;DLK1;GNAI2;SOX2;EEF1G;FADS2;PGRMC1;GAP43;DPYSL5;CANX;HYOU1;FXYD6;EVL;AGRN;SCG2;PFDN5
upper basal lateral hypothalamic area	23/301	0.000132606	0.00401502	0	0	2.52908	22.58	VAT1;TSC22D1;CD81;IGF2;RPL35A;EBF3;FOXM1;GNAI2;RPS25;SLC7A5;PCSK1N;GAL;PEG10;PKIA;RPL37A;FXYD6;TMBIM6;MAPT;PHLDA1;SCG2;PFDN5;AP2M1;RPS23
Bed nuclei of the stria terminalis, posterior division	22/301	0.000342926	0.00983657	0	0	2.40647	19.1988	CADM1;HSBP1;SDC2;USP11;NR2F1;DLK1;GNAI2;EEF1B2;PGRMC1;PCSK1N;GAP43;GAL;PEG10;PNOC;NNAT;RPS3;FXYD6;RPS2;RPS21;SOX4;VAMP2;XPR1
Subparaventricular zone	22/301	0.000342926	0.00983657	0	0	2.40647	19.1988	AHCY;CADM1;RPL10;RGS16;USP11;CRABP1;TARS;PRRC2B;DLK1;GNAI2;SOX2;PGRMC1;PCSK1N;TUBA1A;GAL;PEG10;NNAT;HNRNPD;GNAS;FXYD6;TMBIM6;VAT1L
dorsomedial part of VMH	22/301	0.000342926	0.00983657	0	0	2.40647	19.1988	VAT1;RPL5;RPN2;RPL10;CACNA2D1;SDC2;CRABP1;SURF4;TARS;RPL35A;STMN4;SOX11;GNAI2;PCSK1N;GAL;TRIM28;CDH2;PEG10;HNRNPD;ID4;VIM;RPS12
paraventricular nucleus, lateral part	22/301	0.000342926	0.00983657	0	0	2.40647	19.1988	RPS7;MAGED1;USP11;RPL35A;GNAI2;RPS15;RPS25;PGRMC1;PCSK1N;GAL;DPYSL2;PEG10;PNOC;NNAT;HNRNPD;RPL14;FXYD6;MAPT;RPS27A;PFDN5;VAT1L;RPS12
Bed nuclei of the stria terminalis	21/301	0.000846445	0.0214564	0	0	2.2851	16.1659	CADM1;HSBP1;USP11;CRABP1;DLK1;GNAI2;EEF1B2;PGRMC1;GAP43;GAL;PEG10;PNOC;CDC42EP3;NNAT;RPS3;S100A6;RPS2;RPS21;SOX4;VAMP2;XPR1
Dorsomedial nucleus of the hypothalamus, ventral part	21/301	0.000846445	0.0214564	0	0	2.2851	16.1659	CD63;FCER1G;RPL21;SDC2;CRABP1;SURF4;TARS;SOX11;MKI67;GATA2;PCSK1N;GAL;IPO9;CDH2;PEG10;RPL37A;RPS2;RPS27A;CCT7;SCG2;RPS12
Nucleus of reunions	21/301	0.000846445	0.0214564	0	0	2.2851	16.1659	RAB3C;RPL10;SHC1;RGS16;USP22;LAPTM5;L1CAM;DCAF7;GNAI2;SOX2;FADS2;PGRMC1;GAP43;RIMS3;CDH2;DPYSL5;ID4;CTNNB1;EVL;AGRN;AP2M1
Pallidum, caudal region	21/301	0.000846445	0.0214564	0	0	2.2851	16.1659	CADM1;HSBP1;USP11;CRABP1;DLK1;GNAI2;EEF1B2;PGRMC1;GAP43;GAL;PEG10;PNOC;CDC42EP3;NNAT;RPS3;S100A6;RPS2;RPS21;SOX4;VAMP2;XPR1
Parastrial nucleus	21/301	0.000846445	0.0214564	0	0	2.2851	16.1659	CADM1;RPS7;MAGED1;USP11;CIRBP;PBX1;DLK1;GNAI2;RPS15;GAP43;GAL;NRG4;PEG10;PNOC;NNAT;FXYD6;MAPT;RPS27A;RPS21;VAT1L;RPS12
intermediate stratum of PPaA	21/301	0.000846445	0.0214564	0	0	2.2851	16.1659	VAT1;SYT4;RPN2;CD81;SHC1;USP11;RPL11;DLK1;GNAI2;RPS15;EEF1B2;EEF1G;PGRMC1;GAL;PEG10;PNOC;NNAT;FXYD6;TMBIM6;RPS21;VAT1L
nucleus of the stria terminalis, medial division, anterior part	21/301	0.000846445	0.0214564	0	0	2.2851	16.1659	TOP2A;SYT4;CADM1;USP11;DLK1;GNAI2;SOX2;EEF1B2;PGRMC1;SFPQ;ALCAM;PEG10;PNOC;NNAT;S100A6;DCX;RPS2;RPS21;SF3B1;DBN1;XPR1
parastrial preoptic nucleus	21/301	0.000846445	0.0214564	0	0	2.2851	16.1659	SYT4;RPL10;HSBP1;DLK1;GNAI2;RPS15;EEF1B2;FADS2;PGRMC1;GAP43;GAL;PEG10;IL1B;PNOC;PEA15;NNAT;RPL13;TAGLN2;RPS21;VAT1L;RPS12
periventricular stratum of SeDg	21/301	0.000846445	0.0214564	0	0	2.2851	16.1659	TOP2A;SYT4;CADM1;USP11;DLK1;GNAI2;SOX2;EEF1B2;PGRMC1;SFPQ;ALCAM;PEG10;PNOC;NNAT;S100A6;DCX;RPS2;RPS21;SF3B1;DBN1;XPR1
striohypothalamic nucleus	21/301	0.000846445	0.0214564	0	0	2.2851	16.1659	VAT1;CADM1;USP11;CIRBP;RPL13A;GNAI2;RPS15;EEF1B2;PGRMC1;PCSK1N;GAL;PEG10;PNOC;NNAT;HNRNPD;FXYD6;NCAM1;MAPT;RPS21;PFDN5;RPS23
Bed nucleus of the anterior commissure	27/450	0.0016467	0.0412622	0	0	1.94887	12.4903	RTN1;SHC1;RGS16;USP11;SDC3;SLC1A5;GNAI2;SOX2;PEG10;PEA15;NNAT;SYT4;MARCKSL1;CADM1;SURF4;EBF3;L1CAM;DLK1;GAL;PNOC;ID4;CTNNB1;TAGLN2;TRIB3;SCG2;VAMP2;XPR1
Anterior hypothalamic nucleus, central part	20/301	0.00199112	0.0452151	0	0	2.16497	13.4641	CADM1;MAGED1;USP11;SURF4;DLK1;GNAI2;EEF1B2;PGRMC1;CENPF;PCSK1N;GAL;IPO9;PEG10;PNOC;CANX;NNAT;FXYD6;RPS21;SCG2;VAT1L
Bed nuclei of the stria terminalis, anterior division, ventral nucleus	20/301	0.00199112	0.0452151	0	0	2.16497	13.4641	VAT1;CADM1;USP11;RPL13A;PBX1;SMARCA4;GNAI2;RPS15;EEF1B2;PCSK1N;GAL;PEG10;PNOC;NNAT;FXYD6;NCAM1;MAPT;RPS21;SOX4;AP2M1
Ventromedial hypothalamic nucleus, central part	20/301	0.00199112	0.0452151	0	0	2.16497	13.4641	RPL5;FCER1G;SDC2;CRABP1;SURF4;STMN3;TARS;RPL35A;STMN4;SOX11;MKI67;GNAI2;EEF1A1;PCSK1N;GAL;TRIM28;CDH2;PEG10;ID4;RPS12
bed nucleus of the stria terminalis, medioseptal division	20/301	0.00199112	0.0452151	0	0	2.16497	13.4641	TOP2A;SYT4;CADM1;USP11;DLK1;GNAI2;SOX2;EEF1B2;PGRMC1;SFPQ;ALCAM;PEG10;NNAT;S100A6;DCX;RPS2;RPS21;SF3B1;DBN1;XPR1
central part of VMH	20/301	0.00199112	0.0452151	0	0	2.16497	13.4641	RPL5;FCER1G;RPS7;SDC2;CRABP1;STMN3;TARS;RPL35A;STMN4;MKI67;GNAI2;PCSK1N;GAL;RPS19;TRIM28;CDH2;PEG10;HNRNPD;ID4;RPS12
intermediate stratum of DgSe	20/301	0.00199112	0.0452151	0	0	2.16497	13.4641	DDX17;SLC10A4;SYT4;CADM1;USP11;DLK1;GNAI2;SOX2;EEF1B2;PGRMC1;ALCAM;IPO9;PEG10;PNOC;NNAT;DCX;FXYD6;NCAM1;CCT7;RPS21
intermediate stratum of PO1	20/301	0.00199112	0.0452151	0	0	2.16497	13.4641	VAT1;SLC10A4;CADM1;RPS7;USP11;TARS;PBX1;SMARCA4;GNAI2;RPS15;GAL;NRG4;PEG10;PNOC;NNAT;MAGED2;FXYD6;RPS21;VAT1L;RPS12
intermediate stratum of POH	20/301	0.00199112	0.0452151	0	0	2.16497	13.4641	VAT1;MARCKSL1;CADM1;RGS16;USP11;SURF4;CIRBP;DLK1;RPS15;EEF1B2;PCSK1N;GAL;PEG10;PNOC;NNAT;HNRNPD;FXYD6;RPS21;SCG2;VAT1L
reuniens nucleus, main part	20/301	0.00199112	0.0452151	0	0	2.16497	13.4641	RAB3C;SHC1;RGS16;STMN2;LAPTM5;STMN4;L1CAM;SOX2;GAP43;RIMS3;GNG2;CDH2;DPYSL5;DPYSL3;CTNNB1;EVL;MAPT;AGRN;AP2M1;CLASP2
Dorsal motor nucleus of the vagus nerve	19/301	0.00445661	0.0981354	0	0	2.04606	11.0761	SLC10A4;APC2;CHRNA3;AHNAK;RPL12;MSN;SLC7A1;YWHAZ;ACLY;LGALS1;GAL;DPYSL3;MAB21L2;PPT1;TAGLN2;PLIN2;MVD;FDFT1;PRPH
Ventromedial hypothalamic nucleus, dorsomedial part	19/301	0.00445661	0.0981354	0	0	2.04606	11.0761	RPL5;RPL10;CACNA2D1;SDC2;CRABP1;SURF4;TARS;RPL35A;SOX11;MKI67;GATA2;GNAI2;PCSK1N;GAL;CDH2;PEG10;ID4;VIM;RPS12
septohypothalamic nucleus	19/301	0.00445661	0.0981354	0	0	2.04606	11.0761	SLC10A4;SYT4;SDC3;RPSA;SLC1A5;L1CAM;DLK1;GNAI2;SOX2;EEF1B2;PGRMC1;ALCAM;IPO9;PEG10;PEA15;NNAT;ID4;FXYD6;DBN1
Bed nuclei of the stria terminalis, anterior division	18/301	0.00947534	0.179619	0	0	1.92835	8.98431	CADM1;ACTN1;USP11;CRABP1;DLK1;GNAI2;SOX2;EEF1B2;PGRMC1;GAP43;GAL;PEG10;PNOC;CDC42EP3;NNAT;S100A6;DCX;RPS21
Medial preoptic nucleus, lateral part	18/301	0.00947534	0.179619	0	0	1.92835	8.98431	MARCKSL1;FCER1G;CADM1;MAGED1;SDC2;RGS16;USP11;SURF4;PBX1;EEF1A1;PCSK1N;GAL;IPO9;VGF;PEG10;CANX;NNAT;SCG2
Medial septal nucleus	18/301	0.00947534	0.179619	0	0	1.92835	8.98431	SLC10A4;SYT4;PTPRS;CADM1;USP11;NSG1;DLK1;GNAI2;EEF1B2;ACLY;ALCAM;IPO9;PEG10;PNOC;DNER;MAPT;AP2M1;XPR1
Subparafascicular nucleus, magnocellular part	18/301	0.00947534	0.179619	0	0	1.92835	8.98431	RET;RAB3C;RPS8;SDC2;RGS16;USP22;EBF3;HSPG2;EEF1G;IPO9;YWHAQ;SCRN1;DPYSL5;PNOC;IDS;EVL;SCG2;PFDN5
dorsomedial nucleus, terminal part	18/301	0.00947534	0.179619	0	0	1.92835	8.98431	CD63;FCER1G;SDC2;RPL12;SURF4;TARS;SOX11;MKI67;PCSK1N;GAL;RPS19;TRIM28;PEG10;RPL37A;GNAS;TAGLN2;VIM;SCG2
intermediate stratum of ZIC	18/301	0.00947534	0.179619	0	0	1.92835	8.98431	H2AFY;CD81;RPS8;SDC2;RPL11;IGF2;EBF3;DLK1;EEF1G;RPS25;PEG10;PKIA;PNOC;RPL24;MAGED2;TMBIM6;RPS21;SCG2
lateral septal nucleus, intermedio-ventral part	18/301	0.00947534	0.179619	0	0	1.92835	8.98431	DDX17;SLC10A4;SYT4;CADM1;USP11;DLK1;GNAI2;SOX2;EEF1B2;PGRMC1;ALCAM;IPO9;PEG10;PNOC;DCX;FXYD6;NCAM1;RPS21
layer 3 of AOV cortex	18/301	0.00947534	0.179619	0	0	1.92835	8.98431	TOP2A;YWHAE;NTRK2;IL1RN;MARCKSL1;FOXG1;NR2F1;CRMP1;SOX11;PTN;MKI67;GATA2;FOXM1;DUSP6;DCX;GPC2;SOX4;VAMP2
locus coeruleus	18/301	0.00947534	0.179619	0	0	1.92835	8.98431	VAT1;SLC10A4;APC2;SLC7A1;SEPT2;PHOX2A;TMEFF1;ACLY;GAL;RPS18;PEG10;PRDX1;RPL37A;SNCG;PLIN2;MVD;NCAM1;FDFT1
mantle zone of DgSe	18/301	0.00947534	0.179619	0	0	1.92835	8.98431	VAT1;SLC10A4;SYT4;CADM1;USP11;DLK1;GNAI2;ACLY;ALCAM;GAL;IPO9;PEG10;PNOC;DNER;FXYD6;EVL;MAPT;AP2M1
mantle zone of ZIC	18/301	0.00947534	0.179619	0	0	1.92835	8.98431	H2AFY;CD81;RPS8;SDC2;RPL11;IGF2;EBF3;DLK1;EEF1G;RPS25;PEG10;PKIA;PNOC;RPL24;MAGED2;TMBIM6;RPS21;SCG2
peduncular nucleus of the stria medullaris	18/301	0.00947534	0.179619	0	0	1.92835	8.98431	CADM1;SHC1;GNAI2;EEF1B2;PGRMC1;GAP43;GAL;HNRNPH1;PNOC;ID4;TAGLN2;FXYD6;RPS2;RPS21;PHLDA1;SCG2;XPR1;RPS23
periventricular stratum of r1BL	18/301	0.00947534	0.179619	0	0	1.92835	8.98431	VAT1;SLC10A4;APC2;SLC7A1;SEPT2;PHOX2A;TMEFF1;ACLY;GAL;RPS18;PEG10;PRDX1;RPL37A;SNCG;PLIN2;MVD;NCAM1;FDFT1
rostral zona incerta	18/301	0.00947534	0.179619	0	0	1.92835	8.98431	H2AFY;CD81;RPS8;SDC2;RPL11;IGF2;EBF3;DLK1;EEF1G;RPS25;PEG10;PKIA;PNOC;RPL24;MAGED2;TMBIM6;RPS21;SCG2
tegmental field of p3 (Forel's field)	18/301	0.00947534	0.179619	0	0	1.92835	8.98431	SLC10A4;RET;RPS8;SDC2;IGF2;EBF3;DLK1;YWHAQ;DNER;RPL37A;SNCG;MAGED2;TMBIM6;NCAM1;RPL26;SCG2;RPS24;VAMP2
zona incerta complex	18/301	0.00947534	0.179619	0	0	1.92835	8.98431	H2AFY;CD81;RPS8;SDC2;RPL11;IGF2;EBF3;DLK1;EEF1G;RPS25;PEG10;PKIA;PNOC;RPL24;MAGED2;TMBIM6;RPS21;SCG2
Dorsal premammillary nucleus	25/482	0.014374	0.270131	0	0	1.66189	7.05032	CD81;RPL12;SDC2;STMN4;GATA2;PGRMC1;PCSK1N;IPO9;TRIM28;DPYSL5;DNER;RPL37;FCER1G;TSC22D1;SURF4;SOX11;EBF3;SLC7A5;RPL37A;CANX;S100A6;GNAS;SCG2;PFDN5;RPS23
Barrington's nucleus	17/301	0.0191039	0.308492	0	0	1.81183	7.17099	VAT1;SLC10A4;APC2;PRKDC;SURF4;RPL35A;NSG1;SLC7A1;PHOX2A;FADS2;ACLY;RPS16;GAL;PEG10;RPL35;SNCG;PLIN2
Dorsal peduncular area, layer 6a	17/301	0.0191039	0.308492	0	0	1.81183	7.17099	TOP2A;GRN;RPLP0;SOX11;SLC3A2;FOXM1;CDH2;PPP2R1A;STC2;ARHGDIA;S100A6;CNTN1;DCX;FLNA;CDH13;ADNP;SOX4
Hypothalamus	17/301	0.0191039	0.308492	0	0	1.81183	7.17099	VAT1;SDC2;USP11;CRABP1;PBX1;DLK1;GNAI2;PCSK1N;GAL;PEG10;NNAT;FXYD6;TMBIM6;RPS21;SCG2;VAT1L;RPS12
Nucleus of the solitary tract, commissural part	17/301	0.0191039	0.308492	0	0	1.81183	7.17099	VAT1;APC2;AHNAK;IGFBP3;MSN;PRDX6;YWHAZ;RGS5;ACLY;GAL;FASN;PPT1;TAGLN2;PLIN2;LCP1;PRPH;HIST1H1C
central part of MPO	17/301	0.0191039	0.308492	0	0	1.81183	7.17099	FCER1G;SDC2;RGS16;CIRBP;PBX1;PCSK1N;GAL;RPS19;NRG4;PEG10;PNOC;CANX;NNAT;MAGED2;UBA1;SCG2;RPS12
diagonal part of septum	17/301	0.0191039	0.308492	0	0	1.81183	7.17099	VAT1;SLC10A4;SYT4;CADM1;USP11;DLK1;GNAI2;ACLY;ALCAM;GAL;IPO9;PEG10;DNER;FXYD6;EVL;MAPT;AP2M1
intermediate periretromammillary nucleus	17/301	0.0191039	0.308492	0	0	1.81183	7.17099	FCER1G;CD81;CACNA2D1;SDC2;IGF2;EBF3;SOX11;PCSK1N;IPO9;DPYSL5;DNER;RPL37A;NCAM1;RPL37;SCG2;PFDN5;AP2M1
intermediate stratum of PHyB-P	17/301	0.0191039	0.308492	0	0	1.81183	7.17099	FCER1G;CD81;CACNA2D1;SDC2;IGF2;EBF3;SOX11;PCSK1N;IPO9;DPYSL5;DNER;RPL37A;NCAM1;RPL37;SCG2;PFDN5;AP2M1
intermediate stratum of THyB-I	17/301	0.0191039	0.308492	0	0	1.81183	7.17099	CD63;FCER1G;SDC2;RPL12;CRABP1;SURF4;STMN4;SOX11;PCSK1N;RPS19;TRIM28;RPL37A;S100A6;GNAS;VIM;RPS12;RPL19
magnocellular (medial) subparafascicular nucleus	17/301	0.0191039	0.308492	0	0	1.81183	7.17099	MARCKSL1;SHMT2;SDC2;RGS16;EBF3;NMNAT2;LSS;EEF1G;SQLE;MORF4L1;YWHAQ;SCRN1;DPYSL5;IL1B;PNOC;CDH13;HYOU1
mantle zone of isBM	17/301	0.0191039	0.308492	0	0	1.81183	7.17099	VAT1;SLC10A4;RET;SDC2;CEBPG;SLC7A1;DLK1;ACLY;DPYSL5;PNOC;RPL37A;CNTN1;MAGED2;MVD;NCAM1;SCG2;FDFT1
medial part of the isB	17/301	0.0191039	0.308492	0	0	1.81183	7.17099	VAT1;SLC10A4;RET;SDC2;CEBPG;SLC7A1;DLK1;ACLY;DPYSL5;PNOC;RPL37A;CNTN1;MAGED2;MVD;NCAM1;SCG2;FDFT1
p1B part of the periaqueductal gray	17/301	0.0191039	0.308492	0	0	1.81183	7.17099	VAT1;RET;HSPA9;SARS;EBF3;LSS;ACLY;TUBB3;PNOC;HYOU1;TIMP1;FAU;AGRN;BCAT1;SLC38A2;RPS24;VAMP2
peduncular (caudal) hypothalamus	17/301	0.0191039	0.308492	0	0	1.81183	7.17099	VAT1;RPN2;CD81;SDC2;IGF2;DLK1;GNAI2;RPS15;GAL;PEG10;NNAT;FXYD6;TMBIM6;NCAM1;RPS21;SCG2;VAT1L
periventricular stratum of VTTh	17/301	0.0191039	0.308492	0	0	1.81183	7.17099	MARCKSL1;SHMT2;SDC2;RGS16;EBF3;NMNAT2;LSS;EEF1G;SQLE;MORF4L1;YWHAQ;SCRN1;DPYSL5;IL1B;PNOC;CDH13;HYOU1
periventricular stratum of isLim	17/301	0.0191039	0.308492	0	0	1.81183	7.17099	VAT1;SLC10A4;SHMT2;RPS8;RPL12;EBF3;GNAI2;ACLY;PEG10;PKIA;RPL37A;SNCG;MAGED2;FXYD6;NCAM1;RPS11;SCG2
r10 part of nucleus gracilis	17/301	0.0191039	0.308492	0	0	1.81183	7.17099	SLC10A4;APC2;CHRNA3;AHNAK;IGFBP3;MSN;SLC7A1;LSS;YWHAZ;GAL;DPYSL3;PPT1;S100A6;TAGLN2;PLIN2;FDFT1;PRPH
rostral interstitial nucleus	17/301	0.0191039	0.308492	0	0	1.81183	7.17099	RET;GPM6A;RPL21;RPS8;SDC2;EBF3;HSPG2;LSS;EEF1G;IPO9;YWHAQ;SCRN1;DPYSL5;IDS;NCAM1;SCG2;PFDN5
shell of T-DMH	17/301	0.0191039	0.308492	0	0	1.81183	7.17099	CD63;FCER1G;SDC2;RPL12;SURF4;TARS;SOX11;MKI67;PCSK1N;RPS19;TRIM28;PEG10;RPL37A;GNAS;TAGLN2;VIM;SCG2
Anterior hypothalamic nucleus, posterior part	16/301	0.0364604	0.516128	0	0	1.69649	5.61797	CADM1;RPL31;CACNA2D1;USP11;GNAI2;PGRMC1;PCSK1N;GAL;IPO9;PEG10;PEA15;CANX;NNAT;HYOU1;FXYD6;VAT1L
Anteroventral periventricular nucleus	16/301	0.0364604	0.516128	0	0	1.69649	5.61797	VAT1;RPL5;MARCKSL1;FCER1G;RPS7;RGS16;PBX1;PCSK1N;GAL;PEG10;PNOC;NNAT;RPS11;SCG2;RPS12;RPL19
Median preoptic nucleus	16/301	0.0364604	0.516128	0	0	1.69649	5.61797	VAT1;MAGED1;SDC2;USP11;PRDX6;DLK1;GNAI2;GAL;PEG10;PNOC;PEA15;NNAT;ID4;TIMP1;SCG2;RPS12
Subparafascicular area	16/301	0.0364604	0.516128	0	0	1.69649	5.61797	SDC2;RGS16;EBF3;NMNAT2;LSS;SOX2;EEF1G;MORF4L1;YWHAQ;SCRN1;DPYSL5;PNOC;CDH13;HYOU1;SCG2;PFDN5
anterior paraventricular nucleus of thalamus	16/301	0.0364604	0.516128	0	0	1.69649	5.61797	CD63;RAB3C;SHC1;SDC2;RGS16;ITGB2;PROX1;L1CAM;SOX2;RIMS3;DPYSL5;FASN;ID4;CTNNB1;MVD;MAPT
intermediate part of PHyB	16/301	0.0364604	0.516128	0	0	1.69649	5.61797	VAT1;GRN;MARCKSL1;CD81;SDC2;IGF2;SOX11;DLK1;GNAI2;PCSK1N;GAL;PEG10;FXYD6;TMBIM6;TIMP1;SCG2
intermediate stratum of TPaA	16/301	0.0364604	0.516128	0	0	1.69649	5.61797	CADM1;USP11;SURF4;CIRBP;DLK1;RPS15;EEF1B2;PCSK1N;GAL;PEG10;PNOC;CANX;NNAT;HNRNPD;FXYD6;RPS21
isthmic basal plate	16/301	0.0364604	0.516128	0	0	1.69649	5.61797	VAT1;SLC10A4;AHNAK;SDC2;RPL12;EBF3;DLK1;ACLY;PEG10;PNOC;CNTN1;SNCG;MAGED2;MVD;NCAM1;FDFT1
isthmic liminal part of the periaqueductal gray	16/301	0.0364604	0.516128	0	0	1.69649	5.61797	VAT1;SLC10A4;SHMT2;RPS8;RPL12;EBF3;GATA3;GNAI2;PEG10;PKIA;PNOC;RPL37A;SNCG;FXYD6;RPS11;SCG2
lower basal perifornical nucleus	16/301	0.0364604	0.516128	0	0	1.69649	5.61797	VAT1;TSC22D1;CD81;IGF2;SOX11;FOXM1;GNAI2;SLC7A5;PCSK1N;GAL;PEG10;DNER;RPL37A;CCT7;PFDN5;RPS23
mantle zone of PHyB-I	16/301	0.0364604	0.516128	0	0	1.69649	5.61797	VAT1;GRN;MARCKSL1;CD81;SDC2;IGF2;SOX11;DLK1;GNAI2;PCSK1N;GAL;PEG10;FXYD6;TMBIM6;TIMP1;SCG2
mantle zone of PHyB-P	16/301	0.0364604	0.516128	0	0	1.69649	5.61797	CD81;CACNA2D1;SDC2;RPL12;IGF2;EBF3;SOX11;SLC7A5;PCSK1N;DPYSL5;DNER;RPL37A;NCAM1;SCG2;PFDN5;AP2M1
mantle zone of PHyB-V	16/301	0.0364604	0.516128	0	0	1.69649	5.61797	MARCKSL1;RPN2;SDC2;IGF2;DCAF7;DLK1;GNAI2;SOX2;GAL;PEG10;FXYD6;NCAM1;TIMP1;VIM;SCG2;VAT1L
mantle zone of POH	16/301	0.0364604	0.516128	0	0	1.69649	5.61797	VAT1;MARCKSL1;CADM1;RGS16;USP11;SURF4;DLK1;EEF1B2;PCSK1N;GAL;PEG10;PNOC;NNAT;FXYD6;RPS21;SCG2
perimammillary part of PHyB	16/301	0.0364604	0.516128	0	0	1.69649	5.61797	CD81;CACNA2D1;SDC2;RPL12;IGF2;EBF3;SOX11;SLC7A5;PCSK1N;DPYSL5;DNER;RPL37A;NCAM1;SCG2;PFDN5;AP2M1
periventricular stratum of p1B	16/301	0.0364604	0.516128	0	0	1.69649	5.61797	VAT1;RET;HSPA9;SARS;EBF3;LSS;ACLY;TUBB3;PNOC;TIMP1;FAU;AGRN;BCAT1;SLC38A2;RPS24;VAMP2
periventricular stratum of r10Tr	16/301	0.0364604	0.516128	0	0	1.69649	5.61797	SLC10A4;APC2;CHRNA3;AHNAK;MSN;PRDX6;SLC7A1;YWHAZ;ACLY;LGALS1;GAL;MAB21L2;PPT1;TAGLN2;PLIN2;MVD
r10 part of solitary complex	16/301	0.0364604	0.516128	0	0	1.69649	5.61797	SLC10A4;APC2;CHRNA3;AHNAK;MSN;PRDX6;SLC7A1;YWHAZ;ACLY;LGALS1;GAL;MAB21L2;PPT1;TAGLN2;PLIN2;MVD
ventral part of PHyB	16/301	0.0364604	0.516128	0	0	1.69649	5.61797	MARCKSL1;RPN2;SDC2;IGF2;DCAF7;DLK1;GNAI2;SOX2;GAL;PEG10;FXYD6;NCAM1;TIMP1;VIM;SCG2;VAT1L
lateral posterior nucleus	27/602	0.0553638	0.778666	0	0	1.42218	4.11554	PTPRS;MAGED1;RGS16;USP11;GNAI2;RPS15;EEF1B2;PGRMC1;PCSK1N;PEG10;NNAT;RPS27A;VAT1L;VAT1;SYT4;CADM1;UNC5C;PROX1;DLK1;PNOC;CANX;HNRNPD;WAC;FXYD6;TMBIM6;RPS21;EIF3A
Suprachiasmatic nucleus	18/370	0.0569604	0.795985	0	0	1.54474	4.4263	GRN;RGS16;USP11;CRABP1;TARS;DLK1;GNAI2;ILF3;TUBA1A;VGF;PEG10;NNAT;HNRNPD;GNAS;TIMP1;SCG2;RPS12;RPL19
Lateral hypothalamic area	15/301	0.0657563	0.848217	0	0	1.58231	4.30672	VAT1;DLK1;GNAI2;RPS15;PCSK1N;GAL;PEG10;NNAT;MAGED2;FXYD6;TMBIM6;NCAM1;RPS21;AP2M1;VAT1L
Midbrain trigeminal nucleus	15/301	0.0657563	0.848217	0	0	1.58231	4.30672	SLC10A4;APC2;SEPT2;GNAI2;PHOX2A;ACLY;GAL;RPS18;PEG10;PRDX1;RPL37A;PLXNA1;SNCG;RPS20;MVD
Midline group of the dorsal thalamus	15/301	0.0657563	0.848217	0	0	1.58231	4.30672	RAB3C;CHRNA3;SHC1;SDC2;RGS16;LAPTM5;PROX1;L1CAM;SOX2;RIMS3;CDH2;DPYSL5;FASN;ID4;CTNNB1
Parabrachial nucleus, medial division	15/301	0.0657563	0.848217	0	0	1.58231	4.30672	SLC10A4;MSN;SEPT2;GNAI2;SLC7A5;ACLY;GAL;RPS18;PEG10;PRDX1;PLXNA1;SNCG;RPS20;NCAM1;WHSC1
Parabrachial nucleus, medial division, medial medial part	15/301	0.0657563	0.848217	0	0	1.58231	4.30672	SLC10A4;MSN;SEPT2;GNAI2;SLC7A5;ACLY;GAL;RPS18;PEG10;PRDX1;PLXNA1;SNCG;RPS20;NCAM1;WHSC1
Periventricular hypothalamic nucleus, posterior part	15/301	0.0657563	0.848217	0	0	1.58231	4.30672	CD63;FCER1G;SDC2;RPL12;CRABP1;SURF4;MSN;SOX11;PCSK1N;TRIM28;S100A6;GNAS;VIM;RPS12;RPL19
Primary visual area, layer 6b	15/301	0.0657563	0.848217	0	0	1.58231	4.30672	CAP1;CDKN1A;YWHAB;SSR2;HDLBP;ATP2A2;GATA3;HMGCR;MYL6;FASN;PPT1;CTNNB1;HDGF;ADNP;PAFAH1B1
Retrosplenial area, lateral agranular part, layer 6a	15/301	0.0657563	0.848217	0	0	1.58231	4.30672	NTRK2;CDKN1A;RBFOX2;PTPRS;MYO5A;ATP2A2;HMGCR;YWHAZ;DUSP6;NGRN;TNRC18;S100A4;INSM2;RPS27A;RAB6B
Sublaterodorsal nucleus	15/301	0.0657563	0.848217	0	0	1.58231	4.30672	VAT1;SLC10A4;APC2;SEPT2;PHOX2A;TMEFF1;ACLY;GAL;PEG10;FASN;SNCG;PLIN2;MVD;FAU;FDFT1
lower dorsal perifornical nucleus	15/301	0.0657563	0.848217	0	0	1.58231	4.30672	VAT1;RPS7;USP11;IGF2;GNAI2;RPS15;PCSK1N;GAL;PEG10;NNAT;HNRNPD;FXYD6;TMBIM6;RPS21;VAT1L
nucleus of the stria terminalis, medial division, ventral part	15/301	0.0657563	0.848217	0	0	1.58231	4.30672	SYT4;HSBP1;USP11;RPL11;EBF3;DLK1;GNAI2;PGRMC1;GAL;NRG4;PEG10;PNOC;NNAT;RPS21;XPR1
posteromedial visual area, layer 6a	15/301	0.0657563	0.848217	0	0	1.58231	4.30672	NTRK2;CDKN1A;CNBP;HDLBP;SYP;PTN;HMGCR;GATA2;DUSP6;TUBA1B;ZMIZ1;CDC42EP3;MAPT;ADNP;RAB6B
preopto-hypothalamic band	15/301	0.0657563	0.848217	0	0	1.58231	4.30672	VAT1;MARCKSL1;CADM1;RGS16;USP11;SURF4;DLK1;EEF1B2;PCSK1N;GAL;PEG10;NNAT;FXYD6;RPS21;SCG2
Ventromedial hypothalamic nucleus	19/405	0.068611	0.879835	0	0	1.48664	3.98315	VAT1;RPL5;CD63;FCER1G;RPS7;SDC2;CRABP1;TARS;STMN4;SOX11;MKI67;GNAI2;PCSK1N;GAL;TRIM28;PEG10;ARHGDIA;ID4;RPS12
Trochlear nucleus	18/405	0.109315	0.999996	0	0	1.40245	3.10435	VAT1;SLC10A4;CCT3;RPL10;MSN;YWHAZ;ACLY;TUBA1A;LGALS1;TUBB3;STC2;PNOC;RPL37A;CNTN1;MVD;NCAM1;FDFT1;RPS12
Agranular insular area, ventral part, layer 6a	14/301	0.111877	0.999996	0	0	1.46927	3.21823	ACTR2;ISLR2;HMGCR;ILF2;SQLE;LARP1;TYROBP;GNG2;CNOT1;ARHGDIA;CDH13;XPR1;IER3;PRPH
Anteroventral nucleus of thalamus	14/301	0.111877	0.999996	0	0	1.46927	3.21823	CD63;IGFBP2;ITGB2;DBI;PROX1;FOXM1;HSPG2;LSS;CNN3;MMP14;TTR;ID4;VIM;HIST1H1C
Central amygdalar nucleus, medial part	14/301	0.111877	0.999996	0	0	1.46927	3.21823	RPL21;YWHAB;USP22;CRABP1;GATA3;NSG1;ILF2;GNAI2;EEF1B2;PGRMC1;RPS19;PNOC;XPR1;PRPH
Interanteromedial nucleus of the thalamus	14/301	0.111877	0.999996	0	0	1.46927	3.21823	RAB3C;SHC1;RGS16;LAPTM5;PROX1;L1CAM;SOX2;RIMS3;DPYSL5;ID4;CTNNB1;EVL;AP2M1;CLASP2
JcPL part of the periaqueductal gray	14/301	0.111877	0.999996	0	0	1.46927	3.21823	CD63;SYT4;CHRNA3;DBI;MKI67;PRDX6;GNAI2;FADS2;TUBA1A;YWHAQ;RPL27;FXYD6;RPL26;YWHAG
Lateral septal nucleus, ventral part	14/301	0.111877	0.999996	0	0	1.46927	3.21823	SYT4;CADM1;MKI67;DLK1;GNAI2;SOX2;PGRMC1;PEG10;PNOC;NNAT;ID4;RPS2;DBN1;XPR1
Locus ceruleus	14/301	0.111877	0.999996	0	0	1.46927	3.21823	VAT1;SLC10A4;APC2;SLC7A1;SEPT2;PHOX2A;ACLY;GAL;PEG10;PRDX1;SNCG;PLIN2;MVD;FDFT1
Medial amygdalar nucleus, anterodorsal part	14/301	0.111877	0.999996	0	0	1.46927	3.21823	MARCKSL1;RPL21;NR2F1;GATA3;PRDX6;ILF2;SOX2;ALCAM;RPS19;CDH2;DNER;GNAS;SCG2;AP2M1
Paraventricular nucleus of the thalamus	14/301	0.111877	0.999996	0	0	1.46927	3.21823	CD63;RAB3C;CHRNA3;SHC1;SDC2;RGS16;PROX1;L1CAM;SOX2;DPYSL5;FASN;ID4;CTNNB1;MVD
PcPV part of the periaqueductal gray	14/301	0.111877	0.999996	0	0	1.46927	3.21823	MARCKSL1;SOX11;NMNAT2;ATP5G3;SEPT3;EEF1G;SQLE;YWHAQ;DPYSL5;DPYSL2;RPL27A;PNOC;RPL13;HYOU1
Periventricular zone	14/301	0.111877	0.999996	0	0	1.46927	3.21823	VAT1;CD63;RPS7;SDC2;CRABP1;SURF4;DLK1;GNAI2;PCSK1N;GAL;RPL18A;PEG10;RPS12;RPL19
Taenia tecta, dorsal part, layer 4	14/301	0.111877	0.999996	0	0	1.46927	3.21823	TOP2A;GRN;SURF4;SOX11;SLC3A2;SLC7A1;CDH2;STC2;CNTN1;DCX;FLNA;CDH13;SOX4;VAMP2
Ventral premammillary nucleus	14/301	0.111877	0.999996	0	0	1.46927	3.21823	FCER1G;SDC2;RPL12;SURF4;TARS;STMN4;SOX11;PCSK1N;TRIM28;CANX;RPL37A;GNAS;TAGLN2;SCG2
Ventromedial hypothalamic nucleus, anterior part	14/301	0.111877	0.999996	0	0	1.46927	3.21823	RPL10;CACNA2D1;USP11;CRABP1;PLAUR;TARS;STMN4;PRRC2B;GNAI2;PCSK1N;TUBA1A;GAL;HNRNPD;ID4
bed nucleus of the stria terminalis, laterocentral division	14/301	0.111877	0.999996	0	0	1.46927	3.21823	TOP2A;TTYH1;ACTN1;CRABP1;MKI67;FOXM1;SOX2;RGS4;TTR;PEG10;CDC42EP3;ID4;S100A6;DCX
dorsolateral isthmic part of the dorsal raphe nucleus	14/301	0.111877	0.999996	0	0	1.46927	3.21823	VAT1;SLC10A4;SHMT2;SDC2;RPS6;GATA3;FADS2;ACLY;DPYSL5;RPL37A;ID4;CNTN1;NCAM1;FDFT1
intermediate stratum of THyB-P	14/301	0.111877	0.999996	0	0	1.46927	3.21823	FCER1G;RPL12;SURF4;STMN4;SOX11;PCSK1N;IPO9;TRIM28;DPYSL5;CANX;S100A6;GNAS;RPL37;SCG2
intermediate stratum of THyB-V	14/301	0.111877	0.999996	0	0	1.46927	3.21823	CD63;GRN;RPL12;MSN;STMN4;SOX11;SLC7A5;PCSK1N;TRIM28;S100A6;GNAS;RPL37;TIMP1;VIM
intermediate stratum of p3B	14/301	0.111877	0.999996	0	0	1.46927	3.21823	SLC10A4;RET;RPS8;SDC2;RPL35A;EBF3;LSS;DLK1;IL1B;MAGED2;TMBIM6;RPS21;SCG2;VAMP2
lateral part of r1B	14/301	0.111877	0.999996	0	0	1.46927	3.21823	VAT1;SLC10A4;AHNAK;IGFBP3;PHOX2A;ACLY;GAL;RPS18;PEG10;PRDX1;PLXNA1;SNCG;PLIN2;MVD
lateral part of the isB	14/301	0.111877	0.999996	0	0	1.46927	3.21823	VAT1;SLC10A4;SDC2;RPL12;EBF3;DLK1;ACLY;PNOC;CNTN1;SNCG;MAGED2;MVD;NCAM1;FDFT1
lateral preoptic area, PO1 part	14/301	0.111877	0.999996	0	0	1.46927	3.21823	VAT1;SLC10A4;STMN3;TARS;PBX1;SMARCA4;RPS15;GAL;NRG4;PEG10;PNOC;UBA1;RPS21;AP2M1
layer 4 of OCx	14/301	0.111877	0.999996	0	0	1.46927	3.21823	CDKN1A;CCL20;HDLBP;PTN;HMGCR;DUSP6;RGS4;LASP1;CDC42EP3;TNRC18;INSM2;MAPT;GAPDH;TPT1
layer 5 of OCx	14/301	0.111877	0.999996	0	0	1.46927	3.21823	NTRK2;CDKN1A;YWHAB;HDLBP;MYO5A;PTN;HMGCR;DUSP6;LASP1;CDC42EP3;TNRC18;INSM2;RAB6B;TPT1
mantle zone of isBL	14/301	0.111877	0.999996	0	0	1.46927	3.21823	VAT1;SLC10A4;SHMT2;RPL12;RPS6;EBF3;ACLY;RPS18;PEG10;PNOC;SNCG;RPS20;MAGED2;NCAM1
mantle zone of r1BL	14/301	0.111877	0.999996	0	0	1.46927	3.21823	VAT1;SLC10A4;AHNAK;IGFBP3;PHOX2A;ACLY;GAL;RPS18;PEG10;PRDX1;PLXNA1;SNCG;PLIN2;MVD
medial amygdala, anterodorsal part	14/301	0.111877	0.999996	0	0	1.46927	3.21823	RPL21;NR2F1;PRDX6;ILF2;SOX2;PGRMC1;ALCAM;RPS19;CDH2;PNOC;DNER;RPL14;AP2M1;XPR1
periventricular stratum of ITTh	14/301	0.111877	0.999996	0	0	1.46927	3.21823	RAB3C;CHRNA3;SDC2;RGS16;CEBPG;PROX1;NMNAT2;L1CAM;MORF4L1;RIMS3;SCRN1;DPYSL5;CTNNB1;AGRN
periventricular stratum of JcPL	14/301	0.111877	0.999996	0	0	1.46927	3.21823	CD63;SYT4;CHRNA3;DBI;MKI67;PRDX6;GNAI2;FADS2;TUBA1A;YWHAQ;RPL27;FXYD6;RPL26;YWHAG
periventricular stratum of Pal	14/301	0.111877	0.999996	0	0	1.46927	3.21823	TOP2A;TTYH1;ACTN1;CRABP1;MKI67;FOXM1;SOX2;RGS4;TTR;PEG10;CDC42EP3;ID4;S100A6;DCX
periventricular stratum of PcPV	14/301	0.111877	0.999996	0	0	1.46927	3.21823	MARCKSL1;SOX11;NMNAT2;ATP5G3;SEPT3;EEF1G;SQLE;YWHAQ;DPYSL5;DPYSL2;RPL27A;PNOC;RPL13;HYOU1
periventricular stratum of r9Lim	14/301	0.111877	0.999996	0	0	1.46927	3.21823	SLC10A4;APC2;IGFBP3;MSN;PRDX6;YWHAZ;ACLY;LGALS1;GAL;FASN;MAB21L2;TAGLN2;PLIN2;MVD
posterior paraventricular nucleus	14/301	0.111877	0.999996	0	0	1.46927	3.21823	CD63;CHRNA3;RPL10;SDC2;RGS16;CEBPG;PROX1;L1CAM;MORF4L1;SCRN1;DPYSL5;FASN;CTNNB1;MAPT
preopto-hypothalamic area	14/301	0.111877	0.999996	0	0	1.46927	3.21823	MARCKSL1;CADM1;RGS16;USP11;SURF4;DLK1;PCSK1N;GAL;PEG10;PNOC;NNAT;FXYD6;RPS21;SCG2
r9 portion of vagal motor nucleus (postmigratory)	14/301	0.111877	0.999996	0	0	1.46927	3.21823	SLC10A4;APC2;IGFBP3;MSN;PRDX6;YWHAZ;ACLY;LGALS1;GAL;FASN;MAB21L2;TAGLN2;PLIN2;MVD
septopallidal core nucleus	14/301	0.111877	0.999996	0	0	1.46927	3.21823	TOP2A;CADM1;TSC22D1;ACTN1;CRABP1;FOXM1;DLK1;SFPQ;PEG10;FABP7;CDC42EP3;NNAT;DCX;SF3B1
sublayer 6a of OCx	14/301	0.111877	0.999996	0	0	1.46927	3.21823	CAP1;NTRK2;CDKN1A;PTPRS;SHMT2;HDLBP;MYO5A;ATP2A2;HMGCR;KLC1;DUSP6;TNRC18;INSM2;WHSC1
substantia nigra compacta, m1 part	14/301	0.111877	0.999996	0	0	1.46927	3.21823	VAT1;SLC10A4;RET;CHRNA3;AHNAK;SHC1;SDC2;L1CAM;LSS;DLK1;PLXNA1;SNCG;VAMP2;AP2M1
superficial stratum of DgSe	14/301	0.111877	0.999996	0	0	1.46927	3.21823	VAT1;SLC10A4;SYT4;USP11;DLK1;GNAI2;ACLY;ALCAM;GAL;PEG10;PNOC;DNER;MAPT;AP2M1
ventral isthmic part of dorsal raphe nucleus	14/301	0.111877	0.999996	0	0	1.46927	3.21823	VAT1;SLC10A4;ITGB2;L1CAM;SLC7A1;ACLY;TUBA1A;DPYSL5;RPL37A;CNTN1;MVD;NCAM1;BCAT1;FDFT1
ventral tuberomammillary nucleus, intermediate part (histaminergic)	14/301	0.111877	0.999996	0	0	1.46927	3.21823	CD63;GRN;RPL12;MSN;STMN4;SOX11;SLC7A5;PCSK1N;TRIM28;S100A6;GNAS;RPL37;TIMP1;VIM
Anterior hypothalamic nucleus	20/492	0.175741	0.999996	0	0	1.27598	2.21861	CADM1;MAGED1;USP11;SURF4;TARS;PRRC2B;GNAI2;EEF1B2;PGRMC1;PCSK1N;IPO9;GAL;PEG10;PNOC;NNAT;CANX;HNRNPD;FXYD6;RPS21;VAT1L
Anterior hypothalamic nucleus, anterior part	13/301	0.179299	0.999996	0	0	1.35737	2.33292	USP11;CRABP1;STMN3;TARS;PRRC2B;GNAI2;PCSK1N;GAL;PEG10;CANX;HNRNPD;GNAS;RPS21
Central amygdalar nucleus	13/301	0.179299	0.999996	0	0	1.35737	2.33292	RPL21;USP22;NR2F1;GATA3;NSG1;ILF2;GNAI2;TTR;RPS19;PNOC;XPR1;WLS;PRPH
Central linear nucleus raphe	13/301	0.179299	0.999996	0	0	1.35737	2.33292	SLC10A4;RET;SDC2;CEBPG;TMEFF1;GNG2;YWHAQ;SCRN1;PSAT1;PNOC;CNTN1;SCG2;AP2M1
Infralimbic area, layer 6b	13/301	0.179299	0.999996	0	0	1.35737	2.33292	TOP2A;RPL5;GATA2;FOXM1;SEPT2;SEPT3;CDH2;PPP2R1A;ARHGDIA;S100A6;CNTN1;CPE;ADNP
Lateral preoptic area	13/301	0.179299	0.999996	0	0	1.35737	2.33292	VAT1;SLC10A4;SYT4;USP11;TARS;PBX1;GNAI2;GAL;PEG10;PNOC;NNAT;FXYD6;RPS21
Lingula (I), molecular layer	13/301	0.179299	0.999996	0	0	1.35737	2.33292	CD63;GDF15;IGFBP3;IGFBP2;ITGB2;DBI;FADS2;RGS5;ENPP2;FLNA;CTSD;TPT1;WLS
Nucleus of Darkschewitsch	13/301	0.179299	0.999996	0	0	1.35737	2.33292	VAT1;RET;HSPA9;SARS;EBF3;LSS;ACLY;PNOC;TIMP1;AGRN;BCAT1;SLC38A2;VAMP2
Posterior parietal association areas, layer 6a	13/301	0.179299	0.999996	0	0	1.35737	2.33292	CAP1;CDKN1A;PTPRS;HDLBP;MYO5A;ATP2A2;SLC3A2;HMGCR;SLC7A1;DUSP6;TNRC18;INSM2;PHLDA1
Posterior parietal association areas, layer 6b	13/301	0.179299	0.999996	0	0	1.35737	2.33292	CDKN1A;PTPRS;FOXG1;HDLBP;MYO5A;ATP2A2;HMGCR;SLC7A1;PRPF8;DUSP6;NGRN;INSM2;PFN1
Prelimbic area, layer 6b	13/301	0.179299	0.999996	0	0	1.35737	2.33292	YWHAE;RPL5;GATA2;FOXM1;SEPT2;SEPT3;FADS2;CDH2;PPP2R1A;ARHGDIA;CNTN1;CPE;ADNP
Retrosplenial area, dorsal part, layer 6b	13/301	0.179299	0.999996	0	0	1.35737	2.33292	HSPA8;NTRK2;CDKN1A;CNBP;HDLBP;ATP2A2;HMGCR;GATA2;KLC1;TUBA1B;ZMIZ1;MAPT;ADNP
Retrosplenial area, lateral agranular part, layer 6b	13/301	0.179299	0.999996	0	0	1.35737	2.33292	CAP1;CDKN1A;PTPRS;YWHAB;HDLBP;MYO5A;ATP2A2;HMGCR;KLC1;NGRN;ZMIZ1;S100A4;INSM2
Subceruleus nucleus	13/301	0.179299	0.999996	0	0	1.35737	2.33292	VAT1;SLC10A4;YARS;SEPT2;PHOX2A;SLC7A5;GAL;PEG10;PLXNA1;SNCG;MVD;AP2M1;FDFT1
anteroventral periventricular preoptic nucleus	13/301	0.179299	0.999996	0	0	1.35737	2.33292	VAT1;FCER1G;RPS7;RGS16;USP11;PRDX6;PBX1;ILF3;GAL;PEG10;RPL35;SCG2;RPS12
dorsal peduncular cortex, periventricular part	13/301	0.179299	0.999996	0	0	1.35737	2.33292	TOP2A;SURF4;SOX11;DBI;HN1;MKI67;FOXM1;CDH2;DCX;FLNA;CDH13;RPS2;SOX4
hilus of the DG	13/301	0.179299	0.999996	0	0	1.35737	2.33292	RPS7;RPL31;RPL22;RPLP0;ISLR2;PROX1;BAZ1B;NCOR2;GNG2;STC2;FAU;PFN1;XPR1
interanterodorsal nucleus	13/301	0.179299	0.999996	0	0	1.35737	2.33292	RAB3C;SHC1;SDC2;RGS16;PROX1;SLC1A5;L1CAM;RIMS3;DPYSL5;ID4;CTNNB1;AP2M1;CLASP2
intermediate stratum of SeDg	13/301	0.179299	0.999996	0	0	1.35737	2.33292	VAT1;SLC10A4;CADM1;USP11;CRABP1;GNAI2;RPS15;EEF1B2;PEG10;NNAT;NCAM1;RPS21;VAT1L
intermediate stratum of THyB-D	13/301	0.179299	0.999996	0	0	1.35737	2.33292	VAT1;FCER1G;RPS7;SDC2;CRABP1;TARS;MKI67;GNAI2;PCSK1N;GAL;TRIM28;PEG10;RPS12
lambdoid septal zone	13/301	0.179299	0.999996	0	0	1.35737	2.33292	SLC10A4;SYT4;USP11;DLK1;ALCAM;IPO9;PEG10;PNOC;DNER;DCX;TRIB3;AP2M1;XPR1
layer 3 of LOT	13/301	0.179299	0.999996	0	0	1.35737	2.33292	MARCKSL1;RPL21;LRBA;STMN3;SLC1A5;MMP9;SOX2;ACAP3;SCRN1;CNOT1;GNAS;HDGF;AP2M1
layer 6 of OCx	13/301	0.179299	0.999996	0	0	1.35737	2.33292	CAP1;CDKN1A;PTPRS;YWHAB;SSR2;HDLBP;MYO5A;ATP2A2;HMGCR;KLC1;DUSP6;MYL6;INSM2
liminal periaqueductal gray of m2	13/301	0.179299	0.999996	0	0	1.35737	2.33292	RPL30;RPL12;HMGA1;EBF3;GNAI2;PHOX2A;PEG10;PNOC;SNCG;MAGED2;RPS11;AGRN;AP2M1
m1AD (DM) part of periaqueductal gray	13/301	0.179299	0.999996	0	0	1.35737	2.33292	RPL4;RPS6;DDX21;PRDX6;LSS;FADS2;GAP43;TUBA1A;RPL27A;PKIA;RPL37A;CDH13;FXYD6
p2 portion of the parabrachial pigmented nucleus	13/301	0.179299	0.999996	0	0	1.35737	2.33292	SLC10A4;RET;CCT3;SDC2;CEBPG;EBF3;DLK1;YWHAQ;CNTN1;SNCG;SCG2;AP2M1;FDFT1
periventricular mantle of isBM	13/301	0.179299	0.999996	0	0	1.35737	2.33292	VAT1;SLC10A4;ITGB2;L1CAM;SLC7A1;ACLY;TUBA1A;RPL37A;CNTN1;MVD;NCAM1;BCAT1;FDFT1
periventricular stratum of TTe	13/301	0.179299	0.999996	0	0	1.35737	2.33292	TOP2A;SURF4;SOX11;DBI;HN1;MKI67;FOXM1;CDH2;DCX;FLNA;CDH13;RPS2;SOX4
periventricular stratum of isBL	13/301	0.179299	0.999996	0	0	1.35737	2.33292	VAT1;SLC10A4;SHMT2;RPL12;RPS6;GATA3;ACLY;DPYSL5;RPL37A;ID4;CNTN1;NCAM1;SCG2
periventricular stratum of m1AD	13/301	0.179299	0.999996	0	0	1.35737	2.33292	RPL4;RPS6;DDX21;PRDX6;LSS;FADS2;GAP43;TUBA1A;RPL27A;PKIA;RPL37A;CDH13;FXYD6
periventricular stratum of m2Lim	13/301	0.179299	0.999996	0	0	1.35737	2.33292	RPL30;RPL12;HMGA1;EBF3;GNAI2;PHOX2A;PEG10;PNOC;SNCG;MAGED2;RPS11;AGRN;AP2M1
periventricular stratum of r9Tr	13/301	0.179299	0.999996	0	0	1.35737	2.33292	VAT1;APC2;IGFBP3;PRDX6;YWHAZ;RGS5;ACLY;LGALS1;GAL;MAB21L2;TAGLN2;PLIN2;MVD
r1 roof plate	13/301	0.179299	0.999996	0	0	1.35737	2.33292	CD63;IGFBP3;IGFBP2;ITGB2;DBI;HSPG2;RGS5;TTR;FLNA;CTSD;TPT1;WLS;HIST1H1C
r9 (gustatory) part of solitary complex	13/301	0.179299	0.999996	0	0	1.35737	2.33292	VAT1;APC2;IGFBP3;PRDX6;YWHAZ;RGS5;ACLY;LGALS1;GAL;MAB21L2;TAGLN2;PLIN2;MVD
substantia innominata/basal nucleus	13/301	0.179299	0.999996	0	0	1.35737	2.33292	VAT1;SLC10A4;RPL10;CRABP1;RPS15;SOX2;EEF1G;RPS19;PEG10;DNER;TTC3;VAMP2;AP2M1
substantia innominata/basal nucleus, transitional part	13/301	0.179299	0.999996	0	0	1.35737	2.33292	VAT1;SLC10A4;CADM1;USP11;CRABP1;GNAI2;RPS15;EEF1B2;PEG10;NNAT;NCAM1;RPS21;VAT1L
superficial part of arcuate nucleus	13/301	0.179299	0.999996	0	0	1.35737	2.33292	CHGA;CD63;FCER1G;SDC2;RPL12;SURF4;SOX11;PCSK1N;CANX;RPL37A;S100A6;GNAS;RPL37
superficial stratum of m2B	13/301	0.179299	0.999996	0	0	1.35737	2.33292	VAT1;SLC10A4;RET;GRN;CHRNA3;AHNAK;SDC2;IGF2;DLK1;YWHAQ;SNCG;VIM;AP2M1
Central amygdalar nucleus, capsular part	17/433	0.23992	0.999996	0	0	1.22836	1.75343	RPL21;NR2F1;GATA3;ILF2;GNAI2;ACTG1;GAP43;TTR;RPS19;PEG10;IL1B;PNOC;CDC42EP3;AP2M1;XPR1;WLS;PRPH
Agranular insular area, ventral part	12/301	0.270355	0.999996	0	0	1.24659	1.63056	ACTR2;GRN;LARP1;TYROBP;GNG2;CNOT1;HNRNPF;PLAUR;ISLR2;ACTN4;HMGCR;PRPH
Anterior olfactory nucleus, medial part	12/301	0.270355	0.999996	0	0	1.24659	1.63056	TOP2A;IL1RN;DCX;CRMP1;SOX11;PTN;ADNP;YBX1;MKI67;GATA2;SOX4;VAMP2
Anteromedial visual area, layer 5	12/301	0.270355	0.999996	0	0	1.24659	1.63056	CDKN1A;HDLBP;TNRC18;INSM2;MAPT;PTN;HMGCR;CCT7;YWHAZ;GAPDH;DUSP6;SMARCA4
Anteromedial visual area, layer 6b	12/301	0.270355	0.999996	0	0	1.24659	1.63056	CAP1;NTRK2;CDKN1A;PTPRS;ZMIZ1;KIF26A;YWHAB;HDLBP;ATP2A2;INSM2;HMGCR;PHLDA1
Central medial nucleus of the thalamus	12/301	0.270355	0.999996	0	0	1.24659	1.63056	SOX2;RAB3C;RIMS3;DPYSL5;SHC1;RGS16;ID4;CTNNB1;EVL;PROX1;L1CAM;AGRN
Dorsal nucleus raphe	12/301	0.270355	0.999996	0	0	1.24659	1.63056	VAT1;SLC10A4;CCT3;ACLY;PNOC;RPL37A;CNTN1;SNCG;NCAM1;GATA3;L1CAM;FDFT1
Gustatory areas, layer 5	12/301	0.270355	0.999996	0	0	1.24659	1.63056	TMEFF1;ACTR2;LASP1;LARP1;TYROBP;CNOT1;HNRNPF;PPT1;PLAUR;ACTN4;FDFT1;PRPH
Hypothalamic lateral zone	12/301	0.270355	0.999996	0	0	1.24659	1.63056	RPS15;VAT1;GAL;PEG10;CRABP1;PNOC;MAGED2;FXYD6;TMBIM6;RPS21;DLK1;GNAI2
JcPV part of the periaqueductal gray	12/301	0.270355	0.999996	0	0	1.24659	1.63056	SQLE;SYT4;CHRNA3;CCND1;DPYSL2;RPL27A;ATP5A1;FXYD6;MKI67;AGRN;PRDX6;VAMP2
Lingula (I)	12/301	0.270355	0.999996	0	0	1.24659	1.63056	CD63;FADS2;RGS5;TTR;RPLP0;IGFBP2;ITGB2;ENPP2;FLNA;DBI;CTSD;WLS
Medial amygdalar nucleus, posterodorsal part, sublayer a	12/301	0.270355	0.999996	0	0	1.24659	1.63056	MARCKSL1;RPL21;STC2;DNER;APLP1;NR2F1;CDH13;HDGF;GATA3;GATA2;ILF2;DBN1
Nucleus of the lateral olfactory tract, layer 3	12/301	0.270355	0.999996	0	0	1.24659	1.63056	TUBA1B;MARCKSL1;RPS19;NR2F1;GNAS;STMN3;HDGF;GATA3;BAZ1B;PHLDA1;ILF2;AP2M1
Nucleus of the lateral olfactory tract, pyramidal layer	12/301	0.270355	0.999996	0	0	1.24659	1.63056	ACAP3;ACTR2;MARCKSL1;RPL21;SCRN1;LRBA;PSAP;STMN3;HDGF;GATA3;SCG2;AP2M1
Orbital area, lateral part, layer 6a	12/301	0.270355	0.999996	0	0	1.24659	1.63056	TMEFF1;ACAP3;NGRN;IL1RN;TYROBP;LRP1;RPS18;MYO5A;SLC1A5;PRPF8;SREBF2;MTDH
Parabrachial nucleus, lateral division, external lateral part	12/301	0.270355	0.999996	0	0	1.24659	1.63056	VAT1;SQLE;SYT4;SPARC;RPS18;PRDX1;STC2;RPS20;NCAM1;GATA3;ADNP;L1CAM
PcPL part of the periaqueductal gray	12/301	0.270355	0.999996	0	0	1.24659	1.63056	SQLE;CD63;FADS2;CHRNA3;YWHAQ;SDC2;CEBPG;FXYD6;MKI67;PRDX6;YWHAG;GNAI2
Periaqueductal gray	12/301	0.270355	0.999996	0	0	1.24659	1.63056	SLC10A4;SQLE;RPS8;PNOC;RPL37A;SNCG;EBF3;NCAM1;AGRN;LSS;PFDN5;RPS24
Perireunensis nucleus	12/301	0.270355	0.999996	0	0	1.24659	1.63056	SOX2;RAB3C;RIMS3;DPYSL5;SHC1;RGS16;PNOC;CTNNB1;PROX1;L1CAM;AGRN;CLASP2
Posterolateral visual area, layer 6b	12/301	0.270355	0.999996	0	0	1.24659	1.63056	CAP1;GNG2;FASN;SSR2;NR2F1;HDLBP;CTNNB1;INSM2;GATA3;SLC1A5;FOXM1;PRPH
Subiculum, dorsal part, stratum radiatum	12/301	0.270355	0.999996	0	0	1.24659	1.63056	TMEFF1;PARP1;EIF3L;STC2;ITGB2;SPRY4;UNC5C;SLIT3;PROX1;PFN1;SF3B1;LSS
Ventromedial hypothalamic nucleus, ventrolateral part	12/301	0.270355	0.999996	0	0	1.24659	1.63056	VAT1;PCSK1N;FCER1G;GAL;TRIM28;PEG10;SDC2;ARHGDIA;CRABP1;STMN3;TARS;MKI67
Zona incerta	12/301	0.270355	0.999996	0	0	1.24659	1.63056	RET;RAB31;YWHAQ;RPS8;PNOC;RPL35A;RPL27;TMBIM6;MVD;GATA3;RPS21;DLK1
accumbens nucleus, core domain	12/301	0.270355	0.999996	0	0	1.24659	1.63056	TOP2A;ALCAM;ACTN1;CDC42EP3;ID4;DCX;GPC2;SOX11;MKI67;FOXM1;PHLDA1;SOX4
anterior nuclei	12/301	0.270355	0.999996	0	0	1.24659	1.63056	CD63;TTR;SHC1;RGS16;ITGB2;ID4;DBI;PROX1;L1CAM;FOXM1;LSS;CNN3
anteroventral nucleus	12/301	0.270355	0.999996	0	0	1.24659	1.63056	CD63;TTR;RGS16;IGFBP2;ITGB2;ID4;DBI;PROX1;FOXM1;HSPG2;LSS;CNN3
centromedian nucleus	12/301	0.270355	0.999996	0	0	1.24659	1.63056	SOX2;RAB3C;RIMS3;DPYSL5;SHC1;RGS16;LAPTM5;CTNNB1;STMN4;EVL;PROX1;L1CAM
dorsal part of THyB	12/301	0.270355	0.999996	0	0	1.24659	1.63056	VAT1;PCSK1N;GAL;TRIM28;RPS7;PEG10;SDC2;CRABP1;TARS;MKI67;RPS12;GNAI2
granule cell layer of the DG	12/301	0.270355	0.999996	0	0	1.24659	1.63056	NCOR2;RPS7;PKIA;RPL22;RPLP0;ISLR2;PROX1;FAU;PFN1;ZNF664;XPR1;RPS12
intermediate isthmic part of the dorsal raphe nucleus	12/301	0.270355	0.999996	0	0	1.24659	1.63056	VAT1;SLC10A4;ACLY;DPYSL5;SHMT2;RPS6;RPL37A;CNTN1;NCAM1;GATA3;SLC7A1;FDFT1
intermediate stratum of isBL	12/301	0.270355	0.999996	0	0	1.24659	1.63056	SLC10A4;SYT4;AHNAK;RPS18;PEG10;RPL12;PLXNA1;SNCG;EBF3;RPS20;MAGED2;NCAM1
isthmic part of basolateral isthmic reticular formation	12/301	0.270355	0.999996	0	0	1.24659	1.63056	SLC10A4;SYT4;AHNAK;RPS18;PEG10;RPL12;PLXNA1;SNCG;EBF3;RPS20;MAGED2;NCAM1
liminal nucleus	12/301	0.270355	0.999996	0	0	1.24659	1.63056	RIMS3;YWHAQ;DPYSL5;RGS16;FSCN1;CDH13;EBF3;EVL;L1CAM;AGRN;LSS;DDR2
mantle zone of PalSe	12/301	0.270355	0.999996	0	0	1.24659	1.63056	SOX2;SLC10A4;SYT4;ALCAM;TTR;PEG10;PNOC;ID4;MKI67;SOX4;XPR1;GNAI2
mantle zone of THyB-D	12/301	0.270355	0.999996	0	0	1.24659	1.63056	VAT1;PCSK1N;GAL;TRIM28;RPS7;PEG10;SDC2;CRABP1;TARS;MKI67;RPS12;GNAI2
periventricular stratum of DTTh	12/301	0.270355	0.999996	0	0	1.24659	1.63056	SOX2;RAB3C;RIMS3;DPYSL5;SHC1;RGS16;ID4;LAPTM5;CTNNB1;PROX1;MAPT;L1CAM
periventricular stratum of JcPV	12/301	0.270355	0.999996	0	0	1.24659	1.63056	SQLE;SYT4;CHRNA3;CCND1;DPYSL2;RPL27A;ATP5A1;FXYD6;MKI67;AGRN;PRDX6;VAMP2
periventricular stratum of PcPL	12/301	0.270355	0.999996	0	0	1.24659	1.63056	SQLE;CD63;FADS2;CHRNA3;YWHAQ;SDC2;CEBPG;FXYD6;MKI67;PRDX6;YWHAG;GNAI2
periventricular stratum of SeStr	12/301	0.270355	0.999996	0	0	1.24659	1.63056	TOP2A;ALCAM;ACTN1;CDC42EP3;ID4;DCX;GPC2;SOX11;MKI67;FOXM1;PHLDA1;SOX4
periventricular stratum of TPaA	12/301	0.270355	0.999996	0	0	1.24659	1.63056	SOX2;PCSK1N;GAL;PEG10;RGS16;NNAT;HYOU1;FXYD6;SCG2;VAT1L;DLK1;RPL19
periventricular stratum of isBI	12/301	0.270355	0.999996	0	0	1.24659	1.63056	VAT1;SLC10A4;ACLY;DPYSL5;SHMT2;RPS6;RPL37A;CNTN1;NCAM1;GATA3;SLC7A1;FDFT1
periventricular stratum of p2Lim	12/301	0.270355	0.999996	0	0	1.24659	1.63056	RIMS3;YWHAQ;DPYSL5;RGS16;FSCN1;CDH13;EBF3;EVL;L1CAM;AGRN;LSS;DDR2
periventricular stratum of r1Lim	12/301	0.270355	0.999996	0	0	1.24659	1.63056	SLC10A4;SQLE;ACLY;GAL;RPS18;RPL37A;SNCG;RPS20;PLIN2;NCAM1;WHSC1;SLC7A1
r9 part of nucleus gracilis	12/301	0.270355	0.999996	0	0	1.24659	1.63056	VAT1;RGS5;GAL;GDF15;KIF26A;IGFBP3;TAGLN2;PLIN2;DBI;GATA2;PRDX6;LSS
retroreuniens nucleus	12/301	0.270355	0.999996	0	0	1.24659	1.63056	SOX2;RAB3C;YWHAQ;DPYSL5;SDC2;RGS16;PNOC;STMN4;EBF3;L1CAM;AGRN;SCG2
roof plate of p2 (epithalamic roofplate)	12/301	0.270355	0.999996	0	0	1.24659	1.63056	CD63;FADS2;IL1RN;MMP14;CHRNA3;AHNAK;STC2;IL1B;IGFBP3;ITGB2;DBI;VIM
rostral paraventricular nucleus	12/301	0.270355	0.999996	0	0	1.24659	1.63056	SOX2;PCSK1N;GAL;PEG10;RGS16;NNAT;HYOU1;FXYD6;SCG2;VAT1L;DLK1;RPL19
superficial dorsofrontal area	12/301	0.270355	0.999996	0	0	1.24659	1.63056	BRD2;MORF4L1;RPL18A;TRIM2;WAC;PLAUR;PROX1;FAU;BAZ1B;OAZ1;EIF3D;XPR1
superficial mantle of isBM	12/301	0.270355	0.999996	0	0	1.24659	1.63056	VAT1;SLC10A4;RET;CHRNA3;AHNAK;YWHAQ;SDC2;CRABP1;SNCG;L1CAM;LSS;DLK1
superficial stratum of PCPD	12/301	0.270355	0.999996	0	0	1.24659	1.63056	BRD2;MORF4L1;RPL18A;TRIM2;WAC;PLAUR;PROX1;FAU;BAZ1B;OAZ1;EIF3D;XPR1
ventral reuniens nucleus	12/301	0.270355	0.999996	0	0	1.24659	1.63056	SOX2;RAB3C;RIMS3;YWHAQ;DPYSL5;SHC1;RGS16;CRMP1;STMN4;PROX1;L1CAM;AGRN
Rhomboid nucleus	13/345	0.326602	0.999996	0	0	1.17476	1.31457	RAB3C;SHC1;RGS16;LAPTM5;STMN4;PROX1;L1CAM;SOX2;RIMS3;DPYSL5;CTNNB1;EVL;AGRN
Anterior tegmental nucleus	20/552	0.333317	0.999996	0	0	1.12848	1.23982	SLC10A4;UNC5B;RPL12;SDC2;CEBPG;YWHAZ;ZMPSTE24;PHOX2A;ACLY;TUBA1A;GNG2;SCRN1;YWHAQ;DPYSL5;PSAT1;FTH1;PNOC;MAGED2;MVD;NCAM1
Accessory olfactory bulb, granular layer	11/301	0.383296	0.999996	0	0	1.13692	1.09025	IL1RN;BTG1;RAB31;KIF26A;ZNF704;IL1B;CDC42EP3;DCX;WHSC1;SOX4;CNN3
Agranular insular area, dorsal part, layer 6a	11/301	0.383296	0.999996	0	0	1.13692	1.09025	ACTR2;LARP1;TYROBP;GNG2;YWHAB;FASN;ISLR2;RPS20;SREBF2;XPR1;IER3
Anterior cingulate area, dorsal part, layer 6b	11/301	0.383296	0.999996	0	0	1.13692	1.09025	YWHAE;SCRN1;PPP2R1A;MYO5A;CPE;ATP2A2;ADNP;GATA2;LSS;SREBF2;SEPT3
Anterior olfactory nucleus, posteroventral part	11/301	0.383296	0.999996	0	0	1.13692	1.09025	TMEFF1;ACTR2;DNER;PLAUR;PTN;YBX1;GATA2;SOX4;VAMP2;AP2M1;RTN4
Anteromedial visual area, layer 6a	11/301	0.383296	0.999996	0	0	1.13692	1.09025	NGRN;CDKN1A;PTPRS;HDLBP;MYO5A;ATP2A2;TNRC18;INSM2;SYP;HMGCR;KLC1
Bed nuclei of the stria terminalis, anterior division, fusiform nucleus	11/301	0.383296	0.999996	0	0	1.13692	1.09025	RPS15;VAT1;GAL;CADM1;PEG10;USP11;CRABP1;NNAT;NCAM1;DDR2;GNAI2
Dentate gyrus, polymorph layer	11/301	0.383296	0.999996	0	0	1.13692	1.09025	NCOR2;GNG2;RPS7;STC2;TRIM2;RPL22;RPLP0;PROX1;FAU;BAZ1B;XPR1
Endopiriform nucleus, dorsal part	11/301	0.383296	0.999996	0	0	1.13692	1.09025	ACTR2;TYROBP;GNG2;RPL21;ACTN1;FOXG1;ARHGDIA;ISLR2;HMGCR;SREBF2;VAMP2
Field CA3, stratum pyramidale	11/301	0.383296	0.999996	0	0	1.13692	1.09025	RPS7;FOXG1;STC2;IGFBP3;LAPTM5;CNTN1;ISLR2;PLXNA1;UNC5C;PFN1;VAMP2
Gustatory areas, layer 6a	11/301	0.383296	0.999996	0	0	1.13692	1.09025	TMEFF1;ACTR2;LASP1;LARP1;TYROBP;GNG2;PPT1;PLAUR;ACTN4;IER3;PRPH
Interanterodorsal nucleus of the thalamus	11/301	0.383296	0.999996	0	0	1.13692	1.09025	SOX2;RAB3C;RIMS3;SHC1;SDC2;RGS16;ID4;CTNNB1;PROX1;L1CAM;AP2M1
Interbrain	11/301	0.383296	0.999996	0	0	1.13692	1.09025	RAB3C;GAL;RIMS3;SHC1;RGS16;CRABP1;ID4;UNC5C;PROX1;L1CAM;RPS21
Intermediodorsal nucleus of the thalamus	11/301	0.383296	0.999996	0	0	1.13692	1.09025	RAB3C;RIMS3;DPYSL5;SHC1;RGS16;CTNNB1;STMN4;EVL;PROX1;NMNAT2;L1CAM
Major island of Calleja	11/301	0.383296	0.999996	0	0	1.13692	1.09025	SLC10A4;TOP2A;SYT4;ALCAM;TSC22D1;HNRNPH1;PEG10;DCX;SF3B1;GAPDH;XPR1
Medial amygdalar nucleus, posterodorsal part, sublayer c	11/301	0.383296	0.999996	0	0	1.13692	1.09025	FADS2;TTR;PNOC;DNER;NR2F1;DBI;GATA3;DCAF7;XPR1;PRRC2A;PRPH
Midbrain, behavioral state related	11/301	0.383296	0.999996	0	0	1.13692	1.09025	VAT1;SLC10A4;RET;ACLY;IL1RN;SDC2;IGF2;SNCG;GATA3;TIMP1;VIM
Parabrachial nucleus	11/301	0.383296	0.999996	0	0	1.13692	1.09025	SLC10A4;SPARC;GAL;RPS18;PEG10;PRDX1;RPS20;NCAM1;GATA3;WHSC1;GNAI2
Parataenial nucleus	11/301	0.383296	0.999996	0	0	1.13692	1.09025	SOX2;RAB3C;SHC1;SDC2;RGS16;ID4;CTNNB1;DBI;PROX1;L1CAM;AP2M1
Pedunculopontine nucleus	11/301	0.383296	0.999996	0	0	1.13692	1.09025	SLC10A4;YWHAQ;RPS18;PEG10;STC2;RPS6;PLXNA1;SNCG;RPL35A;RPS20;GATA3
Posterior amygdalar nucleus	11/301	0.383296	0.999996	0	0	1.13692	1.09025	MARCKSL1;PEA15;DNER;APLP1;PSAP;NR2F1;TARS;HDGF;GATA2;ILF2;AP2M1
Primary motor area, Layer 6b	11/301	0.383296	0.999996	0	0	1.13692	1.09025	TMEFF1;PTPRS;SCRN1;LRP1;HDLBP;MYO5A;ATP2A2;SLC7A1;EIF3D;SREBF2;SEPT3
Primary somatosensory area, trunk, layer 6a	11/301	0.383296	0.999996	0	0	1.13692	1.09025	LASP1;PTPRS;LRP1;NSD1;PPT1;HDLBP;MYO5A;INSM2;PTN;HMGCR;SLC7A1
Primary visual area, layer 5	11/301	0.383296	0.999996	0	0	1.13692	1.09025	CDKN1A;LASP1;CCL20;CDC42EP3;HDLBP;TNRC18;INSM2;PTN;HMGCR;DUSP6;TPT1
Subiculum, dorsal part, molecular layer	11/301	0.383296	0.999996	0	0	1.13692	1.09025	RPS25;TMEFF1;BTG1;EIF3L;RPL22;UNC5C;TCF4;SLIT3;PROX1;SNRNP200;SF3B1
Substantia nigra, compact part	11/301	0.383296	0.999996	0	0	1.13692	1.09025	VAT1;SLC10A4;RET;SLC38A1;CHRNA3;YWHAQ;SDC2;IGF2;SNCG;LSS;VAMP2
bed nucleus of the external capsule	11/301	0.383296	0.999996	0	0	1.13692	1.09025	CAP1;ACTR2;TYROBP;GNG2;SCRN1;ACTN1;CDC42EP3;ID4;CDH13;HMGCR;SREBF2
dorsal part of PcP	11/301	0.383296	0.999996	0	0	1.13692	1.09025	BRD2;RSL1D1;RPL18A;RPS18;HNRNPH1;TRIM2;RPS6;WAC;PROX1;FAU;XPR1
dorsal part of alar p3	11/301	0.383296	0.999996	0	0	1.13692	1.09025	SOX2;CD63;TTR;SHC1;SDC2;RGS16;ID4;DBI;PROX1;L1CAM;XPR1
dorsal peduncular cortex, intermediate part	11/301	0.383296	0.999996	0	0	1.13692	1.09025	TOP2A;CDH2;SURF4;DCX;FLNA;CDH13;GATA2;FOXM1;SOX4;VAMP2;SEPT2
intermediate part of the arcuate nucleus	11/301	0.383296	0.999996	0	0	1.13692	1.09025	CD63;PCSK1N;FCER1G;TRIM28;SDC2;CRABP1;RPL37A;S100A6;SOX11;RPS12;RPL19
intermediate stratum of Hb	11/301	0.383296	0.999996	0	0	1.13692	1.09025	CD63;CHRNA3;SCRN1;DPYSL5;SDC2;FABP7;RGS16;ID4;CTNNB1;PROX1;L1CAM
intermediate stratum of PThE	11/301	0.383296	0.999996	0	0	1.13692	1.09025	SOX2;CD63;TTR;SHC1;SDC2;RGS16;ID4;DBI;PROX1;L1CAM;XPR1
intermediate stratum of PalSe	11/301	0.383296	0.999996	0	0	1.13692	1.09025	SOX2;SLC10A4;SYT4;PGRMC1;ALCAM;PEG10;PNOC;NNAT;XPR1;DLK1;GNAI2
intermediate stratum of TTe	11/301	0.383296	0.999996	0	0	1.13692	1.09025	TOP2A;CDH2;SURF4;DCX;FLNA;CDH13;GATA2;FOXM1;SOX4;VAMP2;SEPT2
intermediate stratum of r6Lim	11/301	0.383296	0.999996	0	0	1.13692	1.09025	SLC10A4;ACLY;LGALS1;RPL12;TARS;MSN;SNCG;SOX11;TAGLN2;LCP1;LSS
isthmic portion of paranigral nucleus	11/301	0.383296	0.999996	0	0	1.13692	1.09025	SLC10A4;RET;TUBA1A;YWHAQ;SCRN1;SDC2;PNOC;DNER;SCG2;AP2M1;DLK1
lateral septal nucleus, intermediate part, periventricular	11/301	0.383296	0.999996	0	0	1.13692	1.09025	CD63;MMP14;TTR;ID4;DBI;PTN;VIM;MKI67;B2M;SOX4;CNN3
lateral septal nucleus, intermedio-intermediate part	11/301	0.383296	0.999996	0	0	1.13692	1.09025	SOX2;SLC10A4;SYT4;PGRMC1;ALCAM;PEG10;PNOC;NNAT;XPR1;DLK1;GNAI2
layer 2 of VPrP cortex	11/301	0.383296	0.999996	0	0	1.13692	1.09025	ACTR2;TYROBP;ARHGDIA;EEF1A2;SERINC1;PTN;CKB;HMGCR;ILF2;SOX4;AP2M1
layer 3 of VPrP cortex	11/301	0.383296	0.999996	0	0	1.13692	1.09025	ACTR2;MARCKSL1;TYROBP;ARHGDIA;DNER;ARHGEF2;PTN;HMGCR;ILF2;VAMP2;AP2M1
layer 5 of InsCx	11/301	0.383296	0.999996	0	0	1.13692	1.09025	TMEFF1;ACTR2;LASP1;LARP1;TYROBP;GNG2;CNOT1;HNRNPF;PPT1;ACTN4;IER3
layer 6 of RSC	11/301	0.383296	0.999996	0	0	1.13692	1.09025	CAP1;GNG2;FASN;NR2F1;CTNNB1;ATP2A2;MVD;SLC1A5;FOXM1;PAFAH1B1;PRPH
liminal part of the r6 alar plate	11/301	0.383296	0.999996	0	0	1.13692	1.09025	SLC10A4;ACLY;LGALS1;NRG4;RPL12;MSN;SNCG;SOX11;HLA-A;LSS;EIF4B
lower basal lateral hypothalamic area	11/301	0.383296	0.999996	0	0	1.13692	1.09025	VAT1;SLC7A5;MARCKSL1;TSC22D1;CD81;IGF2;RPL35A;EBF3;PHLDA1;SCG2;PFDN5
m1 part of paranigral nucleus	11/301	0.383296	0.999996	0	0	1.13692	1.09025	SLC10A4;RET;GRN;YWHAQ;SDC2;PNOC;DNER;SNCG;VIM;SCG2;DLK1
m2 part of nucleus parabrachialis pigmentosus	11/301	0.383296	0.999996	0	0	1.13692	1.09025	SLC10A4;RET;CHRNA3;DPYSL5;FTH1;SDC2;PNOC;CEBPG;DLK1;ZMPSTE24;FDFT1
m2 part of paranigral nucleus	11/301	0.383296	0.999996	0	0	1.13692	1.09025	SLC10A4;RET;GRN;FCER1G;SDC2;IGFBP3;DNER;IGF2;VIM;SCG2;DLK1
mantle zone of PThE	11/301	0.383296	0.999996	0	0	1.13692	1.09025	SOX2;CD63;TTR;SHC1;SDC2;RGS16;ID4;DBI;PROX1;L1CAM;XPR1
mantle zone of PcPD	11/301	0.383296	0.999996	0	0	1.13692	1.09025	BRD2;RSL1D1;RPL18A;RPS18;HNRNPH1;TRIM2;RPS6;WAC;PROX1;FAU;XPR1
mantle zone of p2ZL	11/301	0.383296	0.999996	0	0	1.13692	1.09025	RAB3C;RIMS3;SHC1;RGS16;NR2F1;MYO5A;UNC5C;RPL27;PROX1;L1CAM;LSS
mantle zone of r6Lim	11/301	0.383296	0.999996	0	0	1.13692	1.09025	SLC10A4;ACLY;LGALS1;NRG4;RPL12;MSN;SNCG;SOX11;HLA-A;LSS;EIF4B
mantle zone of the PBC	11/301	0.383296	0.999996	0	0	1.13692	1.09025	SQLE;RPS18;RPS8;PEG10;NNAT;MSN;SNCG;EBF3;RPS20;NCAM1;GNAI2
medial (magnocellular) part of MD	11/301	0.383296	0.999996	0	0	1.13692	1.09025	RAB3C;RIMS3;DPYSL5;SHC1;RGS16;CTNNB1;STMN4;PROX1;SLC1A5;L1CAM;CLASP2
nucleus of the stria medullaris (prethalamic)	11/301	0.383296	0.999996	0	0	1.13692	1.09025	SOX2;CD63;TTR;SHC1;SDC2;RGS16;ID4;DBI;PROX1;L1CAM;XPR1
oculomotor nucleus, main part	11/301	0.383296	0.999996	0	0	1.13692	1.09025	SLC10A4;RET;ACLY;LGALS1;STC2;SPP1;MSN;SNCG;SLC38A2;YWHAZ;AP2M1
p1 part of the substantia nigra compacta	11/301	0.383296	0.999996	0	0	1.13692	1.09025	SLC10A4;RET;SPARC;AHNAK;YWHAQ;SDC2;IGF2;SNCG;VAMP2;AP2M1;DLK1
p2 portion of the substantia nigra pars compacta	11/301	0.383296	0.999996	0	0	1.13692	1.09025	VAT1;SLC10A4;RET;SLC38A1;YWHAQ;SDC2;IGF2;SNCG;VAMP2;AP2M1;DLK1
p3 portion of parabrachial pigmented nucleus	11/301	0.383296	0.999996	0	0	1.13692	1.09025	SLC10A4;RET;SLC7A5;YWHAQ;SDC2;IGFBP2;CEBPG;SNCG;EBF3;SCG2;AP2M1
pallidal septum	11/301	0.383296	0.999996	0	0	1.13692	1.09025	SOX2;SLC10A4;SYT4;ALCAM;TTR;PEG10;ID4;MKI67;SOX4;XPR1;GNAI2
parabrachial complex	11/301	0.383296	0.999996	0	0	1.13692	1.09025	SQLE;RPS18;RPS8;PEG10;NNAT;MSN;SNCG;EBF3;RPS20;NCAM1;GNAI2
periventricular stratum of PalSe	11/301	0.383296	0.999996	0	0	1.13692	1.09025	CD63;MMP14;TTR;ID4;DBI;PTN;VIM;MKI67;B2M;SOX4;CNN3
posteromedial visual area, layer 5	11/301	0.383296	0.999996	0	0	1.13692	1.09025	NTRK2;CDKN1A;TUBA1B;LRP1;CDC42EP3;TNRC18;PTN;ADNP;HMGCR;SF3B1;DUSP6
posteromedial visual area, layer 6b	11/301	0.383296	0.999996	0	0	1.13692	1.09025	CDH2;CCL20;STC2;SSR2;CNBP;HDLBP;G3BP2;MSN;HDGF;HMGCR;KLC1
prerubral area	11/301	0.383296	0.999996	0	0	1.13692	1.09025	SLC10A4;RET;YWHAQ;UNC5B;RPS8;SDC2;EBF3;SCG2;LSS;VAMP2;DLK1
prethalamic eminence	11/301	0.383296	0.999996	0	0	1.13692	1.09025	SOX2;CD63;TTR;SHC1;SDC2;RGS16;ID4;DBI;PROX1;L1CAM;XPR1
r3 part of medial pontine nuclei	11/301	0.383296	0.999996	0	0	1.13692	1.09025	SLC7A5;GRN;SLC25A3;AHNAK;MAB21L2;SPP1;HMGA1;STMN3;NEFL;TARS;PHLDA1
r5 part of A5 noradrenergic cell group	11/301	0.383296	0.999996	0	0	1.13692	1.09025	SLC10A4;ACLY;LGALS1;YWHAQ;LRBA;KIF5B;GPC2;TARS;LCP1;MMP9;PRPH
r6 part of ventral parvicellular reticular formation	11/301	0.383296	0.999996	0	0	1.13692	1.09025	SLC10A4;ACLY;LGALS1;RPL12;TARS;MSN;SNCG;SOX11;TAGLN2;LCP1;LSS
subethmoid nucleus	11/301	0.383296	0.999996	0	0	1.13692	1.09025	RIMS3;YWHAQ;RGS16;CTNNB1;STMN4;S100A4;ARHGEF2;L1CAM;AGRN;LSS;IER3
sublayer 6a of PCx	11/301	0.383296	0.999996	0	0	1.13692	1.09025	TMEFF1;LASP1;PTPRS;LRP1;PPT1;HDLBP;MYO5A;ATP2A2;INSM2;HMGCR;SLC7A1
sublayer 6b of OCx	11/301	0.383296	0.999996	0	0	1.13692	1.09025	CAP1;MYL6;CDKN1A;PPT1;HDLBP;MYO5A;ATP2A2;HDGF;HMGCR;KLC1;DUSP6
submedius thalamic nucleus	11/301	0.383296	0.999996	0	0	1.13692	1.09025	SOX2;RAB3C;RIMS3;YWHAQ;DPYSL5;SHC1;RGS16;STMN4;PROX1;L1CAM;AGRN
substantia nigra compacta, isthmic part	11/301	0.383296	0.999996	0	0	1.13692	1.09025	VAT1;SLC10A4;RET;CHRNA3;AHNAK;YWHAQ;SDC2;CRABP1;SNCG;LSS;DLK1
substantia nigra reticulata, isthmic part	11/301	0.383296	0.999996	0	0	1.13692	1.09025	SLC10A4;AHNAK;NRG4;IGFBP3;IGF2;LAPTM5;VIM;FOXM1;MMP9;LSS;SMARCA4
superficial stratum of isBI	11/301	0.383296	0.999996	0	0	1.13692	1.09025	SLC10A4;AHNAK;NRG4;IGFBP3;IGF2;LAPTM5;VIM;FOXM1;MMP9;LSS;SMARCA4
superficial stratum of r3BM	11/301	0.383296	0.999996	0	0	1.13692	1.09025	SLC7A5;GRN;SLC25A3;AHNAK;MAB21L2;SPP1;HMGA1;STMN3;NEFL;TARS;PHLDA1
superficial stratum of r6Lim	11/301	0.383296	0.999996	0	0	1.13692	1.09025	SLC10A4;ACLY;LGALS1;NRG4;STC2;RPL12;MSN;SOX11;HLA-A;LSS;EIF4B
thalamic (p2) zona limitans domain	11/301	0.383296	0.999996	0	0	1.13692	1.09025	RAB3C;RIMS3;SHC1;RGS16;NR2F1;MYO5A;UNC5C;RPL27;PROX1;L1CAM;LSS
triangular septal nucleus	11/301	0.383296	0.999996	0	0	1.13692	1.09025	SOX2;FADS2;BTG1;TTR;SHC1;IGFBP2;ITGB2;ID4;EBF3;VIM;SMARCA4
ventral endopiriform nucleus	11/301	0.383296	0.999996	0	0	1.13692	1.09025	TYROBP;FOXG1;ARHGDIA;DNER;ARHGEF2;PTN;HMGCR;VAMP2;AP2M1;ACTG1;PRPH
vertical nucleus of the diagonal band	11/301	0.383296	0.999996	0	0	1.13692	1.09025	VAT1;SLC10A4;ALCAM;GAL;PEG10;USP11;PNOC;DNER;STMN4;AP2M1;GNAI2
Septofimbrial nucleus	15/431	0.423285	0.999996	0	0	1.08042	0.928847	CD63;BTG1;IGFBP2;ITGB2;EBF3;PTN;MKI67;SOX2;FADS2;TTR;ID4;MYH9;VIM;DBN1;XPR1
Peripeduncular nucleus	18/532	0.456762	0.999996	0	0	1.04886	0.821876	RBM39;AHNAK;CCL20;FOXG1;RPL11;IGF2;CRMP1;UNC5C;SLC1A5;BAZ1B;PJA2;RPL18A;YWHAQ;PKIA;APEX1;HNRNPC;FGFBP3;DDR2
intermediate stratum of DG	20/597	0.468736	0.999996	0	0	1.03798	0.786495	SLC10A4;RPS7;RPL31;CCL20;RPL22;CRABP1;RPLP0;ISLR2;PROX1;BAZ1B;LSS;PBX1;NCOR2;RPS15;RAB31;GNG2;STC2;FAU;PFN1;XPR1
Anterodorsal nucleus	12/354	0.475841	0.999996	0	0	1.05048	0.780159	CD63;MMP14;TTR;KIF26A;IGFBP2;ITGB2;ID4;DBI;PROX1;VIM;WLS;CNN3
Field CA2, stratum lacunosum-moleculare	14/421	0.49651	0.999996	0	0	1.02955	0.720841	FCER1G;PARP1;FOXG1;ITGB2;LAPTM5;ISLR2;CRMP1;MMP14;STC2;PLXNA1;MYH9;TCF4;PFN1;VAMP2
Ventral tegmental nucleus	13/391	0.499715	0.999996	0	0	1.0293	0.714046	SLC10A4;UNC5B;CEBPG;SOX2;TUBA1A;KIF26A;MVD;NCAM1;CCT7;SLC38A2;VAT1L;FDFT1;RPS12
Facial motor nucleus	11/330	0.502878	0.999996	0	0	1.03199	0.709396	SLC10A4;ACLY;LGALS1;NRG4;STC2;RPL12;MSN;SOX11;HLA-A;LSS;EIF4B
Parafascicular nucleus	13/393	0.507169	0.999996	0	0	1.02378	0.695056	RAB3C;CHRNA3;RGS16;PROX1;L1CAM;LSS;RIMS3;SCRN1;YWHAQ;CTNNB1;EVL;AGRN;IER3
Anterior cingulate area, dorsal part, layer 6a	10/301	0.511058	0.999996	0	0	1.02834	0.690295	TMEFF1;SCRN1;SSR2;MYO5A;ATP2A2;SH3BGRL3;ADNP;ZNF664;SREBF2;SEPT3
Anterior group of the dorsal thalamus	10/301	0.511058	0.999996	0	0	1.02834	0.690295	TTR;SHC1;RGS16;IGFBP2;ITGB2;ID4;CTNNB1;UNC5C;PROX1;L1CAM
Anteromedial visual area, layer 4	10/301	0.511058	0.999996	0	0	1.02834	0.690295	RGS4;CDKN1A;WDR82;TNRC18;PTN;HMGCR;FGFBP3;YWHAZ;GAPDH;DUSP6
Basomedial amygdalar nucleus, anterior part	10/301	0.511058	0.999996	0	0	1.02834	0.690295	PCSK1N;CDH2;DNER;NR2F1;GNAS;GATA3;BAZ1B;ILF2;AP2M1;PRPH
Basomedial amygdalar nucleus, posterior part	10/301	0.511058	0.999996	0	0	1.02834	0.690295	GNG2;CNOT1;DNER;NR2F1;TARS;LCP1;ILF2;DCAF7;AP2M1;PRPH
Bed nuclei of the stria terminalis, anterior division, oval nucleus	10/301	0.511058	0.999996	0	0	1.02834	0.690295	SOX2;TTYH1;PEG10;ACTN1;CRABP1;CDC42EP3;S100A6;MKI67;SOX4;GNAI2
Bed nuclei of the stria terminalis, anterior division, rhomboid nucleus	10/301	0.511058	0.999996	0	0	1.02834	0.690295	SOX2;CADM1;MAGED1;PEG10;CRABP1;PNOC;CDC42EP3;NNAT;RPS2;GNAI2
Cortical amygdalar area, posterior part, medial zone, layer 3	10/301	0.511058	0.999996	0	0	1.02834	0.690295	MARCKSL1;TSC22D1;RPS7;CNOT1;PKIA;PEA15;NR2F1;CDH13;HDGF;AP2M1
Dentate gyrus, granule cell layer	10/301	0.511058	0.999996	0	0	1.02834	0.690295	NCOR2;BRD2;RPS7;PKIA;RPL22;RPLP0;ISLR2;PROX1;FAU;XPR1
Dorsal peduncular area	10/301	0.511058	0.999996	0	0	1.02834	0.690295	FCER1G;GDF15;CRABP1;SOX11;S100A4;HLA-A;FOXM1;HSPG2;NEUROG2;DDR2
Dorsal peduncular area, layer 5	10/301	0.511058	0.999996	0	0	1.02834	0.690295	TOP2A;GDF15;YWHAB;STC2;SURF4;CNTN1;FLNA;CDH13;SOX11;SLC3A2
Endopiriform nucleus	10/301	0.511058	0.999996	0	0	1.02834	0.690295	CAP1;ACTR2;TYROBP;GNG2;RPL21;ARHGDIA;ISLR2;ARHGEF2;HMGCR;VAMP2
Hypoglossal nucleus	10/301	0.511058	0.999996	0	0	1.02834	0.690295	SLC10A4;ACLY;LGALS1;GAL;RPL12;MAB21L2;MSN;TAGLN2;FDFT1;PRPH
Intercalated amygdalar nucleus	10/301	0.511058	0.999996	0	0	1.02834	0.690295	TMEFF1;RPL21;NR2F1;GATA3;ILF2;AP2M1;WLS;GNAI2;ACTG1;PRPH
Intralaminar nuclei of the dorsal thalamus	10/301	0.511058	0.999996	0	0	1.02834	0.690295	RAB3C;RIMS3;DPYSL5;SHC1;RGS16;CTNNB1;EVL;PROX1;L1CAM;AGRN
JcP contribution to LTL	10/301	0.511058	0.999996	0	0	1.02834	0.690295	RPL18A;SHMT2;GDF15;SHC1;PKIA;RGS16;PEA15;RPL37;PROX1;FGFBP3
Lateral visual area, layer 6a	10/301	0.511058	0.999996	0	0	1.02834	0.690295	CDKN1A;LARP1;CNOT1;SSR2;PLAUR;CTNNB1;ATP2A2;HNRNPC;SLC1A5;HMGCR
Lateral visual area, layer 6b	10/301	0.511058	0.999996	0	0	1.02834	0.690295	CAP1;CDKN1A;LARP1;GNG2;SSR2;CNTN1;PLAUR;CTNNB1;HNRNPC;SLC1A5
Lingula (I), granular layer	10/301	0.511058	0.999996	0	0	1.02834	0.690295	CD63;FADS2;RGS5;RPLP0;IGFBP2;ITGB2;ENPP2;VIM;CTSD;WLS
Medial amygdalar nucleus, posterodorsal part	10/301	0.511058	0.999996	0	0	1.02834	0.690295	FADS2;TTR;RPL21;PNOC;DNER;NR2F1;CDH13;GATA3;ILF2;DBN1
Medial habenula	10/301	0.511058	0.999996	0	0	1.02834	0.690295	CD63;FADS2;RGS5;CHRNA3;AHNAK;SCRN1;STC2;ITGB2;VIM;XPR1
Nucleus of the posterior commissure	10/301	0.511058	0.999996	0	0	1.02834	0.690295	RAB3C;CHRNA3;RIMS3;YWHAQ;RGS16;S100A4;L1CAM;AGRN;PFDN5;IER3
Nucleus of the solitary tract	10/301	0.511058	0.999996	0	0	1.02834	0.690295	VAT1;APC2;GAL;FASN;MAB21L2;SOX11;TAGLN2;PLIN2;MVD;PHOX2A
Nucleus of the solitary tract, medial part	10/301	0.511058	0.999996	0	0	1.02834	0.690295	APC2;GAL;ZNF704;RPL12;MAB21L2;SOX11;TAGLN2;PLIN2;MVD;PHOX2A
Nucleus prepositus	10/301	0.511058	0.999996	0	0	1.02834	0.690295	RGS5;SYT4;RBM39;TTR;KIF26A;IGFBP3;ITGB2;MAB21L2;RPL37;PBX1
Orbital area, lateral part, layer 5	10/301	0.511058	0.999996	0	0	1.02834	0.690295	ACAP3;IL1RN;LASP1;LRP1;RPS18;HDLBP;MYO5A;SLC1A5;SREBF2;IER3
Orbital area, ventrolateral part, layer 6a	10/301	0.511058	0.999996	0	0	1.02834	0.690295	TOP2A;NGRN;CDKN1A;TYROBP;S100A6;GPC2;WHSC1;GATA2;SREBF2;VAMP2
Parabrachial nucleus, lateral division, ventral lateral part	10/301	0.511058	0.999996	0	0	1.02834	0.690295	VAT1;SPARC;RPS18;PRDX1;LAPTM5;RPS20;NCAM1;WHSC1;ATP9A;GNAI2
Perihypoglossal nuclei	10/301	0.511058	0.999996	0	0	1.02834	0.690295	RGS5;SYT4;RBM39;TTR;KIF26A;IGFBP3;ITGB2;MAB21L2;RPL37;PBX1
Primary somatosensory area, nose, layer 5	10/301	0.511058	0.999996	0	0	1.02834	0.690295	LASP1;LARP1;HNRNPF;PPT1;PLAUR;PTN;GATA2;B2M;PRPF8;FDFT1
Primary somatosensory area, trunk, layer 5	10/301	0.511058	0.999996	0	0	1.02834	0.690295	RGS4;LASP1;LRP1;NSD1;HDLBP;ATP2A2;TNRC18;INSM2;PTN;FOXM1
Primary somatosensory area, upper limb, layer 6a	10/301	0.511058	0.999996	0	0	1.02834	0.690295	TMEFF1;ACAP3;LASP1;LRP1;KIF5C;PPT1;HDLBP;MYO5A;PTN;SLC7A1
Primary visual area, layer 6a	10/301	0.511058	0.999996	0	0	1.02834	0.690295	CDKN1A;LASP1;SSR2;HDLBP;MYO5A;ATP2A2;INSM2;GATA3;HMGCR;DUSP6
Retrosplenial area, lateral agranular part, layer 5	10/301	0.511058	0.999996	0	0	1.02834	0.690295	CDKN1A;CDC42EP3;TNRC18;S100A4;INSM2;SLC1A5;HMGCR;SF3B1;DUSP6;SMARCA4
Striatum-like amygdalar nuclei	10/301	0.511058	0.999996	0	0	1.02834	0.690295	SOX2;RPS19;RPL21;PNOC;NR2F1;GATA3;ILF2;AP2M1;XPR1;PRPH
Subiculum, dorsal part, pyramidal layer	10/301	0.511058	0.999996	0	0	1.02834	0.690295	TMEFF1;HNRNPK;LRP1;FOXG1;UNC5C;TCF4;SLIT3;PFN1;SF3B1;DUSP6
Ventral tegmental area	10/301	0.511058	0.999996	0	0	1.02834	0.690295	SLC10A4;RET;SLC7A5;SDC2;IGF2;SNCG;EBF3;SCG2;DLK1;FDFT1
basal part of terminal hypothalamus	10/301	0.511058	0.999996	0	0	1.02834	0.690295	CD63;PCSK1N;FCER1G;TRIM28;PEG10;SDC2;RPL12;CRABP1;S100A6;SOX11
basal peduncular hypothalamus	10/301	0.511058	0.999996	0	0	1.02834	0.690295	GRN;MARCKSL1;GAL;PEG10;SDC2;IGF2;TMBIM6;TIMP1;SCG2;GNAI2
basal reticular formation of p1	10/301	0.511058	0.999996	0	0	1.02834	0.690295	SLC10A4;RET;UNC5B;EIF3L;SDC2;PNOC;EBF3;BCAT1;LSS;SMARCA4
bed nucleus of the stria terminalis, mediocentral division	10/301	0.511058	0.999996	0	0	1.02834	0.690295	RAB31;TTR;PEG10;CRABP1;CDC42EP3;ID4;MKI67;FOXM1;SOX4;GNAI2
caudate nucleus	10/301	0.511058	0.999996	0	0	1.02834	0.690295	TOP2A;RGS4;RAB31;TTR;ACTN1;CDC42EP3;ID4;GPC2;SOX11;FOXM1
core part of the anterobasal nucleus	10/301	0.511058	0.999996	0	0	1.02834	0.690295	PCSK1N;GAL;TRIM28;RPS7;PEG10;SDC2;CRABP1;HNRNPD;TARS;GNAI2
dorsal part of alar p2	10/301	0.511058	0.999996	0	0	1.02834	0.690295	CD63;FADS2;RGS5;MMP14;CHRNA3;AHNAK;SCRN1;STC2;ITGB2;VIM
dorsal part of m2A	10/301	0.511058	0.999996	0	0	1.02834	0.690295	FADS2;TUBA1A;RPL10;PKIA;NNAT;FXYD6;VIM;PRDX6;WLS;CNN3
dorsal preisthmic part of periaqueductal gray	10/301	0.511058	0.999996	0	0	1.02834	0.690295	FADS2;TUBA1A;RPL10;PKIA;NNAT;FXYD6;VIM;PRDX6;WLS;CNN3
dorsal tier of thalamus	10/301	0.511058	0.999996	0	0	1.02834	0.690295	RAB3C;RIMS3;SHC1;RGS16;ID4;CTNNB1;UNC5C;PROX1;L1CAM;CLASP2
habenula (old epithalamus)	10/301	0.511058	0.999996	0	0	1.02834	0.690295	CD63;FADS2;RGS5;MMP14;CHRNA3;AHNAK;SCRN1;STC2;ITGB2;VIM
intermediate stratum of SePal	10/301	0.511058	0.999996	0	0	1.02834	0.690295	TOP2A;ALCAM;TSC22D1;PEG10;ACTN1;CRABP1;CDC42EP3;DCX;FOXM1;PHLDA1
intermediate stratum of VPrP	10/301	0.511058	0.999996	0	0	1.02834	0.690295	TYROBP;GNG2;RPL21;ACTN1;ARHGDIA;CDC42EP3;ARHGEF2;HMGCR;SREBF2;VAMP2
intermediate stratum of cerebellar vermis	10/301	0.511058	0.999996	0	0	1.02834	0.690295	CD63;BTG1;TTR;SHMT2;ITGB2;SPRY4;SOX11;S100A4;PBX1;NEUROG2
intermediate stratum of p2B	10/301	0.511058	0.999996	0	0	1.02834	0.690295	SLC10A4;RET;RPS8;SDC2;RGS16;EBF3;TMBIM6;SCG2;LSS;DLK1
intermediate stratum of the PBC	10/301	0.511058	0.999996	0	0	1.02834	0.690295	SLC10A4;RPS18;PRDX1;PLXNA1;MSN;RPS20;NCAM1;WHSC1;SERF2;GNAI2
intermediate stratum of the VAP	10/301	0.511058	0.999996	0	0	1.02834	0.690295	MARCKSL1;CNOT1;YWHAB;STC2;DNER;NR2F1;ILF2;DCAF7;AP2M1;PRPH
isthmic part of mesencephalic trigeminal nucleus	10/301	0.511058	0.999996	0	0	1.02834	0.690295	SLC10A4;ACLY;RPS18;PEG10;PLXNA1;MSN;SNCG;RPS20;NCAM1;GNAI2
lateral part of alar p2	10/301	0.511058	0.999996	0	0	1.02834	0.690295	RAB3C;RIMS3;SHC1;RGS16;ID4;CTNNB1;UNC5C;PROX1;L1CAM;CLASP2
lateral part of the lateral habenular nucleus	10/301	0.511058	0.999996	0	0	1.02834	0.690295	CD63;FADS2;RGS5;CHRNA3;AHNAK;SCRN1;ITGB2;PROX1;VIM;BAZ1B
lateral septal nucleus, dorsal part	10/301	0.511058	0.999996	0	0	1.02834	0.690295	SOX2;ALCAM;PNOC;ENC1;ID4;EBF3;DBI;PTN;B2M;XPR1
lateral spiriform nucleus	10/301	0.511058	0.999996	0	0	1.02834	0.690295	SQLE;FADS2;CHRNA3;GAP43;YWHAQ;SDC2;FABP7;PRDX6;PFDN5;YWHAG
layer 3 of InsCx	10/301	0.511058	0.999996	0	0	1.02834	0.690295	ACTR2;IL1RN;GRN;GNG2;CNOT1;HNRNPF;LAPTM5;PLAUR;HDGF;PTN
layer 5 of FCx	10/301	0.511058	0.999996	0	0	1.02834	0.690295	TMEFF1;LASP1;TYROBP;KIF5C;HDLBP;ATP2A2;SH3BGRL3;INSM2;PTN;ADNP
layer 5 of PCx	10/301	0.511058	0.999996	0	0	1.02834	0.690295	RGS4;LASP1;LRP1;KIF5C;HDLBP;MYO5A;ATP2A2;TNRC18;INSM2;PTN
layer 6 of CCx	10/301	0.511058	0.999996	0	0	1.02834	0.690295	SQLE;TMEFF1;MYO5A;ATP2A2;HMGCR;SLC7A1;DUSP6;SREBF2;VAMP2;SEPT3
layer 6 of InsCx	10/301	0.511058	0.999996	0	0	1.02834	0.690295	ACTR2;LASP1;LARP1;TYROBP;GNG2;PPT1;PLAUR;ACTN4;ILF2;IER3
layer 6b of RSC	10/301	0.511058	0.999996	0	0	1.02834	0.690295	CAP1;FASN;NR2F1;HDLBP;CTNNB1;ATP2A2;HDGF;BAZ1B;FOXM1;PAFAH1B1
liminal part of alar isthmus	10/301	0.511058	0.999996	0	0	1.02834	0.690295	SLC10A4;SHMT2;PEG10;RPS6;SNCG;EBF3;RPS20;MAGED2;FXYD6;SCG2
m1 part of parabrachialis pigmentosus	10/301	0.511058	0.999996	0	0	1.02834	0.690295	SLC10A4;RET;FTH1;SDC2;PNOC;CEBPG;SNCG;DLK1;ZMPSTE24;FDFT1
m2 part of substantia nigra compacta	10/301	0.511058	0.999996	0	0	1.02834	0.690295	VAT1;SLC10A4;CHRNA3;AHNAK;SHC1;NRG4;SDC2;IGF2;L1CAM;LSS
mantle zone of DTTh	10/301	0.511058	0.999996	0	0	1.02834	0.690295	RAB3C;RIMS3;SHC1;RGS16;ID4;CTNNB1;UNC5C;PROX1;L1CAM;CLASP2
mantle zone of Hb	10/301	0.511058	0.999996	0	0	1.02834	0.690295	CD63;FADS2;RGS5;MMP14;CHRNA3;AHNAK;SCRN1;STC2;ITGB2;VIM
mantle zone of SePal	10/301	0.511058	0.999996	0	0	1.02834	0.690295	ALCAM;TSC22D1;NRG4;PEG10;ACTN1;SDC2;CRABP1;CDC42EP3;DCX;PHLDA1
mantle zone of SeStr	10/301	0.511058	0.999996	0	0	1.02834	0.690295	TOP2A;ALCAM;ACTN1;CDC42EP3;DCX;SOX11;MKI67;FOXM1;PHLDA1;SOX4
mantle zone of THyB-P	10/301	0.511058	0.999996	0	0	1.02834	0.690295	PCSK1N;FCER1G;AHNAK;DPYSL5;RPL12;S100A6;GNAS;SOX11;TRIB3;RPL37
mantle zone of THyB-V	10/301	0.511058	0.999996	0	0	1.02834	0.690295	GRN;FCER1G;TRIM28;RPL12;S100A6;GNAS;SOX11;RPL37;TIMP1;VIM
mantle zone of TTe	10/301	0.511058	0.999996	0	0	1.02834	0.690295	TOP2A;FCER1G;GDF15;SURF4;DCX;FLNA;CDH13;SOX4;NEUROG2;DDR2
mantle zone of isLim	10/301	0.511058	0.999996	0	0	1.02834	0.690295	SLC10A4;SHMT2;PEG10;RPS6;SNCG;EBF3;RPS20;MAGED2;FXYD6;SCG2
mantle zone of m2AD	10/301	0.511058	0.999996	0	0	1.02834	0.690295	FADS2;TUBA1A;RPL10;PKIA;NNAT;FXYD6;VIM;PRDX6;WLS;CNN3
mantle zone of p1B	10/301	0.511058	0.999996	0	0	1.02834	0.690295	SLC10A4;RET;SLC38A1;SDC2;IGF2;SNCG;EBF3;BCAT1;LSS;DLK1
mantle zone of p2B	10/301	0.511058	0.999996	0	0	1.02834	0.690295	SLC10A4;RET;SDC2;RGS16;IGF2;EBF3;TMBIM6;LSS;VAMP2;DLK1
medial habenular nucleus	10/301	0.511058	0.999996	0	0	1.02834	0.690295	CD63;FADS2;RGS5;MMP14;CHRNA3;AHNAK;SCRN1;STC2;ITGB2;VIM
medial parabrachial nucleus	10/301	0.511058	0.999996	0	0	1.02834	0.690295	SLC10A4;RPS18;PRDX1;PLXNA1;MSN;RPS20;NCAM1;WHSC1;SERF2;GNAI2
oculomotor nucleus, Edinger-Westphal subnucleus	10/301	0.511058	0.999996	0	0	1.02834	0.690295	VAT1;SLC10A4;RET;CCT3;ACLY;LGALS1;PNOC;SNCG;MAPT;FAU
p1 portion of the paranigral nucleus	10/301	0.511058	0.999996	0	0	1.02834	0.690295	SLC10A4;RET;SDC2;DNER;SNCG;TIMP1;VIM;SCG2;LSS;DLK1
p3 portion of paranigral nucleus	10/301	0.511058	0.999996	0	0	1.02834	0.690295	RET;IL1RN;SDC2;DNER;IGFBP2;IGF2;S100A6;S100A4;TIMP1;VIM
p3 portion of the substantia nigra pars compacta	10/301	0.511058	0.999996	0	0	1.02834	0.690295	VAT1;SLC10A4;RET;SLC38A1;YWHAQ;SDC2;IGF2;SNCG;EBF3;VAMP2
paraseptal subpallium	10/301	0.511058	0.999996	0	0	1.02834	0.690295	TOP2A;ALCAM;PEG10;ACTN1;CRABP1;CDC42EP3;DCX;FOXM1;PHLDA1;SOX4
perimammillary part of THyB	10/301	0.511058	0.999996	0	0	1.02834	0.690295	PCSK1N;FCER1G;AHNAK;DPYSL5;RPL12;S100A6;GNAS;SOX11;TRIB3;RPL37
periventricular part of StrSe	10/301	0.511058	0.999996	0	0	1.02834	0.690295	SOX2;PNOC;ENC1;ID4;EBF3;DBI;PTN;VIM;B2M;XPR1
periventricular stratum of Dg	10/301	0.511058	0.999996	0	0	1.02834	0.690295	RAB31;TTR;PEG10;CRABP1;CDC42EP3;ID4;MKI67;FOXM1;SOX4;GNAI2
periventricular stratum of Hb	10/301	0.511058	0.999996	0	0	1.02834	0.690295	CD63;FADS2;RGS5;MMP14;CHRNA3;AHNAK;SCRN1;STC2;ITGB2;VIM
periventricular stratum of Str	10/301	0.511058	0.999996	0	0	1.02834	0.690295	TOP2A;RGS4;RAB31;TTR;ACTN1;CDC42EP3;ID4;GPC2;SOX11;FOXM1
periventricular stratum of m2AD	10/301	0.511058	0.999996	0	0	1.02834	0.690295	FADS2;TUBA1A;RPL10;PKIA;NNAT;FXYD6;VIM;PRDX6;WLS;CNN3
periventricular stratum of r3Lim	10/301	0.511058	0.999996	0	0	1.02834	0.690295	SLC10A4;GAL;DPYSL5;PRKDC;SURF4;IGFBP2;SNCG;PLIN2;WLS;PHOX2A
posteroventral part of alar p3	10/301	0.511058	0.999996	0	0	1.02834	0.690295	EEF1G;RAB3C;RAB31;RPS8;RGS16;PNOC;IGF2;UNC5C;TMBIM6;LSS
prosomere 2	10/301	0.511058	0.999996	0	0	1.02834	0.690295	RAB3C;RIMS3;SHC1;RGS16;ID4;CTNNB1;UNC5C;PROX1;L1CAM;LSS
r1 part of the 'mesencephalic' trigeminal nucleus	10/301	0.511058	0.999996	0	0	1.02834	0.690295	SLC7A5;ACLY;RPS18;PRDX1;PLXNA1;RPS20;MVD;NCAM1;WHSC1;EIF4B
r2 part of median raphe nucleus	10/301	0.511058	0.999996	0	0	1.02834	0.690295	SLC10A4;YARS;YWHAQ;KIF5B;SPP1;RPL37;L1CAM;BCAT1;YWHAZ;AP2M1
r3 liminal central gray	10/301	0.511058	0.999996	0	0	1.02834	0.690295	SLC10A4;GAL;DPYSL5;PRKDC;SURF4;IGFBP2;SNCG;PLIN2;WLS;PHOX2A
r7 portion of the hypoglossal motor nucleus	10/301	0.511058	0.999996	0	0	1.02834	0.690295	RGS5;ACLY;SYT4;LGALS1;IGFBP3;ITGB2;MAB21L2;MSN;FAU;PBX1
septopallidal transition area	10/301	0.511058	0.999996	0	0	1.02834	0.690295	ALCAM;TSC22D1;NRG4;PEG10;ACTN1;SDC2;CRABP1;CDC42EP3;DCX;PHLDA1
septostriatal transition area (accumbens)	10/301	0.511058	0.999996	0	0	1.02834	0.690295	TOP2A;ALCAM;ACTN1;CDC42EP3;DCX;SOX11;MKI67;FOXM1;PHLDA1;SOX4
shell of VMH	10/301	0.511058	0.999996	0	0	1.02834	0.690295	VAT1;CD63;PCSK1N;GAL;TRIM28;RPS7;PEG10;SDC2;CRABP1;MKI67
sublayer 6a of FCx	10/301	0.511058	0.999996	0	0	1.02834	0.690295	TMEFF1;ACAP3;LASP1;TYROBP;LRP1;HDLBP;MYO5A;SLC7A1;EIF4G1;SEPT3
sublayer 6b of PCx	10/301	0.511058	0.999996	0	0	1.02834	0.690295	TMEFF1;PTPRS;LRP1;YWHAB;FOXG1;HDLBP;MYO5A;HMGCR;SLC7A1;PRPF8
superficial stratum of Hb	10/301	0.511058	0.999996	0	0	1.02834	0.690295	CD63;FADS2;RGS5;CHRNA3;AHNAK;SCRN1;ITGB2;PROX1;VIM;BAZ1B
superficial stratum of JcPL	10/301	0.511058	0.999996	0	0	1.02834	0.690295	RPL18A;SHMT2;GDF15;SHC1;PKIA;RGS16;PEA15;RPL37;PROX1;FGFBP3
superficial stratum of PSPa	10/301	0.511058	0.999996	0	0	1.02834	0.690295	VAT1;SYT4;GRN;GAL;PEG10;MAB21L2;IGF2;MAGED2;TMBIM6;RPS21
superficial stratum of p2ZL	10/301	0.511058	0.999996	0	0	1.02834	0.690295	RAB3C;RIMS3;YWHAQ;SHC1;RGS16;PNOC;UNC5C;L1CAM;AGRN;LSS
thalamic tegmentum	10/301	0.511058	0.999996	0	0	1.02834	0.690295	SLC10A4;RET;SDC2;RGS16;IGF2;EBF3;TMBIM6;LSS;VAMP2;DLK1
upper dorsal lateral hypothalamic area	10/301	0.511058	0.999996	0	0	1.02834	0.690295	RPS15;VAT1;SLC10A4;RAB31;UNC5B;PEG10;LAPTM5;TMBIM6;RPS21;QKI
ventral entopeduncular nucleus	10/301	0.511058	0.999996	0	0	1.02834	0.690295	VAT1;SYT4;GRN;GAL;PEG10;MAB21L2;IGF2;MAGED2;TMBIM6;RPS21
ventral part of THyB	10/301	0.511058	0.999996	0	0	1.02834	0.690295	GRN;FCER1G;TRIM28;RPL12;S100A6;GNAS;SOX11;RPL37;TIMP1;VIM
ventral premammillary nucleus (migrated)	10/301	0.511058	0.999996	0	0	1.02834	0.690295	PCSK1N;FCER1G;TRIM28;SDC2;RPL12;SURF4;GNAS;TARS;MSN;SOX11
ventrolateral part of isA	10/301	0.511058	0.999996	0	0	1.02834	0.690295	SLC10A4;SHMT2;PEG10;RPS6;SNCG;EBF3;RPS20;MAGED2;FXYD6;SCG2
ventromedial nucleus	10/301	0.511058	0.999996	0	0	1.02834	0.690295	RAB3C;RIMS3;YWHAQ;SHC1;RGS16;RPL27;PROX1;L1CAM;AGRN;FOXM1
Field CA3	11/336	0.527054	0.999996	0	0	1.01262	0.648533	RPS7;FOXG1;STC2;IGFBP3;RPL22;LAPTM5;ISLR2;PLXNA1;UNC5C;PFN1;VAMP2
Dentate gyrus	10/320	0.589242	0.999996	0	0	0.964349	0.510063	NCOR2;BRD2;RPS7;PKIA;RPL22;ISLR2;PROX1;FAU;PFN1;XPR1
Dorsal tegmental nucleus	12/396	0.63234	0.999996	0	0	0.933514	0.427855	SOX2;SLC10A4;FADS2;RGS5;KIF26A;RPS6;IGFBP2;RPL37A;HNRNPA2B1;MVD;FDFT1;CNN3
Laterodorsal tegmental nucleus	12/398	0.639202	0.999996	0	0	0.928579	0.415571	SLC10A4;TMEFF1;FADS2;ACLY;CD63;IGF2;RPL35;SNCG;PLIN2;FDFT1;RPS12;PHOX2A
Field CA2, stratum oriens	13/431	0.64117	0.999996	0	0	0.928845	0.412834	TOP2A;PARP1;YWHAB;FOXG1;NCOR2;MMP14;TTR;STC2;PLXNA1;SH3BGRL3;TCF4;PFN1;VAMP2
AOB, granular layer	9/301	0.641785	0.999996	0	0	0.920841	0.408394	IL1RN;CDKN1A;BTG1;RAB31;KIF26A;IL1B;DCX;SOX4;SMARCA4
Agranular insular area	9/301	0.641785	0.999996	0	0	0.920841	0.408394	ACTR2;TYROBP;GNG2;CNOT1;YWHAB;HNRNPF;ACTN4;HMGCR;PRPH
Agranular insular area, dorsal part, layer 5	9/301	0.641785	0.999996	0	0	0.920841	0.408394	TMEFF1;ACAP3;ACTR2;LASP1;TYROBP;GNG2;CNOT1;HNRNPF;HMGCR
Agranular insular area, ventral part, layer 2/3	9/301	0.641785	0.999996	0	0	0.920841	0.408394	ACTR2;GRN;LARP1;TYROBP;GNG2;CNOT1;HNRNPF;PLAUR;PRPH
Anterior cingulate area, ventral part, 6a	9/301	0.641785	0.999996	0	0	0.920841	0.408394	SQLE;GNB1;LONP1;CNTN1;PLAUR;MYO5A;LSS;SREBF2;SEPT3
Anterior cingulate area, ventral part, 6b	9/301	0.641785	0.999996	0	0	0.920841	0.408394	YWHAE;SCRN1;CNTN1;PLAUR;MYO5A;ATP2A2;FOXM1;SREBF2;SEPT3
Arcuate hypothalamic nucleus	9/301	0.641785	0.999996	0	0	0.920841	0.408394	CD63;RPL18A;TRIM28;RPS7;SDC2;CRABP1;S100A6;VIM;RPS12
Basomedial amygdalar nucleus	9/301	0.641785	0.999996	0	0	0.920841	0.408394	CNOT1;DNER;NR2F1;TARS;GATA3;ILF2;DCAF7;AP2M1;PRPH
Bed nuclei of the stria terminalis, anterior division, anterolateral area	9/301	0.641785	0.999996	0	0	0.920841	0.408394	GAL;PEG10;ACTN1;CRABP1;CDC42EP3;NNAT;S100A6;DLK1;GNAI2
Caudoputamen	9/301	0.641785	0.999996	0	0	0.920841	0.408394	CAP1;RGS4;SCRN1;TTYH1;ACTN1;CDC42EP3;ID4;GATA3;HIST1H1C
CoPV part of the periaqueductal gray	9/301	0.641785	0.999996	0	0	0.920841	0.408394	SQLE;FADS2;TUBA1A;RPL27A;RPL13;FXYD6;AGRN;PRDX6;YWHAG
Cortical amygdalar area, anterior part	9/301	0.641785	0.999996	0	0	0.920841	0.408394	RBM39;MARCKSL1;TRIM28;LRBA;TRIB3;GATA3;SCG2;AP2M1;PRPH
Cortical amygdalar area, anterior part, layer 2	9/301	0.641785	0.999996	0	0	0.920841	0.408394	RBM39;MARCKSL1;TRIM28;LRBA;PSAP;GATA3;SCG2;AP2M1;PRPH
Dorsal peduncular area, layer 2/3	9/301	0.641785	0.999996	0	0	0.920841	0.408394	FCER1G;GDF15;CRABP1;CNTN1;CDH13;SOX11;FOXM1;VAMP2;DDR2
Gustatory areas, layer 6b	9/301	0.641785	0.999996	0	0	0.920841	0.408394	LARP1;TYROBP;GNG2;YWHAB;ACTN4;SREBF2;XPR1;IER3;PRPH
Hypothalamic medial zone	9/301	0.641785	0.999996	0	0	0.920841	0.408394	PCSK1N;GAL;DPYSL5;PEG10;SDC2;CRABP1;IGF2;SOX11;SCG2
Infralimbic area	9/301	0.641785	0.999996	0	0	0.920841	0.408394	FCER1G;SHMT2;CRABP1;S100A6;S100A4;HLA-A;HSPG2;NEUROG2;DDR2
Infralimbic area, layer 1	9/301	0.641785	0.999996	0	0	0.920841	0.408394	FCER1G;SHMT2;CRABP1;DCX;S100A4;HLA-A;HSPG2;NEUROG2;DDR2
Infralimbic area, layer 6a	9/301	0.641785	0.999996	0	0	0.920841	0.408394	RPL5;CDKN1A;PPP2R1A;ARHGDIA;S100A6;SLC3A2;ADNP;GATA2;DUSP6
Interpeduncular nucleus	9/301	0.641785	0.999996	0	0	0.920841	0.408394	IL1RN;GRN;FCER1G;SDC2;IGFBP3;IGF2;S100A6;TIMP1;VIM
Koelliker-Fuse nucleus	9/301	0.641785	0.999996	0	0	0.920841	0.408394	VAT1;ZMIZ1;CFL1;LAPTM5;RPS20;NCAM1;ADNP;MKI67;ATP9A
Lateral group of the dorsal thalamus	9/301	0.641785	0.999996	0	0	0.920841	0.408394	NGRN;RIMS3;RGS16;STMN4;UNC5C;GATA3;PROX1;ARHGEF2;L1CAM
Lateral visual area	9/301	0.641785	0.999996	0	0	0.920841	0.408394	CDKN1A;LARP1;CNOT1;PLAUR;PLIN2;HNRNPC;SLC1A5;HMGCR;RPS27A
Medial amygdalar nucleus	9/301	0.641785	0.999996	0	0	0.920841	0.408394	MARCKSL1;RPL21;NR2F1;TRIB3;HDGF;GATA3;PRDX6;ILF2;AP2M1
Medial geniculate complex	9/301	0.641785	0.999996	0	0	0.920841	0.408394	RPL18A;SHC1;PKIA;RGS16;RPL11;IGF2;GATA3;PROX1;FGFBP3
Medial pretectal area	9/301	0.641785	0.999996	0	0	0.920841	0.408394	CD63;FADS2;CHRNA3;SDC2;FABP7;DBI;VIM;PRDX6;PRRC2A
Midbrain raphe nuclei	9/301	0.641785	0.999996	0	0	0.920841	0.408394	SLC10A4;ACLY;IL1RN;SDC2;IGFBP3;PNOC;IGF2;TIMP1;VIM
Nucleus of Roller	9/301	0.641785	0.999996	0	0	0.920841	0.408394	ACLY;SYT4;LGALS1;RPL12;IGFBP3;MAB21L2;MSN;FAU;PBX1
Nucleus of the optic tract	9/301	0.641785	0.999996	0	0	0.920841	0.408394	RSL1D1;GANAB;RPL18A;PKIA;LAPTM5;ISLR2;C1ORF43;SLIT3;PROX1
Olfactory areas	9/301	0.641785	0.999996	0	0	0.920841	0.408394	IL1RN;CDKN1A;KIF26A;IL1B;FABP7;DCX;PLIN2;SOX4;VAMP2
Orbital area, ventrolateral part	9/301	0.641785	0.999996	0	0	0.920841	0.408394	IL1RN;CDKN1A;IL1B;CRABP1;LAPTM5;S100A6;FOXM1;SOX4;NEUROG2
Orbital area, ventrolateral part, layer 2/3	9/301	0.641785	0.999996	0	0	0.920841	0.408394	IL1RN;CDKN1A;IL1B;CRABP1;LAPTM5;S100A6;FOXM1;SOX4;NEUROG2
Parabrachial nucleus, lateral division	9/301	0.641785	0.999996	0	0	0.920841	0.408394	SLC10A4;SPARC;RPS18;PRDX1;PLXNA1;RPS20;NCAM1;WHSC1;GNAI2
Parabrachial nucleus, lateral division, central lateral part	9/301	0.641785	0.999996	0	0	0.920841	0.408394	SLC10A4;RPS18;PLXNA1;MSN;RPS20;NCAM1;WHSC1;SERF2;GNAI2
Parasolitary nucleus	9/301	0.641785	0.999996	0	0	0.920841	0.408394	RGS5;GAL;IGFBP3;S100A6;TAGLN2;PLIN2;MVD;YWHAZ;PHOX2A
Posterior parietal association areas, layer 2/3	9/301	0.641785	0.999996	0	0	0.920841	0.408394	RGS4;CDKN1A;ENC1;TPR;TNRC18;UBA1;HSPG2;DUSP6;TBX3
Posterior parietal association areas, layer 4	9/301	0.641785	0.999996	0	0	0.920841	0.408394	RGS4;CDKN1A;WDR82;TNRC18;INSM2;PTN;HMGCR;HSPG2;DUSP6
Posterior parietal association areas, layer 5	9/301	0.641785	0.999996	0	0	0.920841	0.408394	CDKN1A;LASP1;HDLBP;MYO5A;TNRC18;INSM2;PTN;HMGCR;DUSP6
Posterolateral visual area, layer 4	9/301	0.641785	0.999996	0	0	0.920841	0.408394	RGS4;LASP1;LARP1;PLAUR;INSM2;PTN;HMGCR;DUSP6;PHOX2A
Posterolateral visual area, layer 5	9/301	0.641785	0.999996	0	0	0.920841	0.408394	CDKN1A;LASP1;LARP1;PLAUR;INSM2;PTN;SLC1A5;HMGCR;DUSP6
Precommissural nucleus	9/301	0.641785	0.999996	0	0	0.920841	0.408394	SQLE;CD63;FADS2;CHRNA3;YWHAQ;DPYSL5;SDC2;FABP7;CEBPG
Primary motor area, Layer 6a	9/301	0.641785	0.999996	0	0	0.920841	0.408394	TMEFF1;NGRN;TYROBP;SCRN1;LRP1;HDLBP;MYO5A;ATP2A2;SLC7A1
Primary somatosensory area, mouth, layer 4	9/301	0.641785	0.999996	0	0	0.920841	0.408394	LASP1;LARP1;TYROBP;CIRBP;ENPP2;PLAUR;TNRC18;PTN;B2M
Primary somatosensory area, nose	9/301	0.641785	0.999996	0	0	0.920841	0.408394	LASP1;LARP1;TYROBP;HNRNPF;PPT1;PLAUR;ACTN4;PTN;GATA2
Retrosplenial area, dorsal part, layer 6a	9/301	0.641785	0.999996	0	0	0.920841	0.408394	CDKN1A;PTPRS;MYO5A;TNRC18;S100A4;INSM2;HMGCR;RPS27A;RAB6B
Retrosplenial area, lateral agranular part	9/301	0.641785	0.999996	0	0	0.920841	0.408394	NGRN;CDKN1A;TNRC18;S100A4;INSM2;HMGCR;SF3B1;DUSP6;SMARCA4
Secondary motor area, layer 6a	9/301	0.641785	0.999996	0	0	0.920841	0.408394	TMEFF1;TYROBP;SCRN1;SSR2;HDLBP;MYO5A;ATP2A2;SH3BGRL3;SLC3A2
Secondary motor area, layer 6b	9/301	0.641785	0.999996	0	0	0.920841	0.408394	TMEFF1;ACTR2;SCRN1;LRP1;PPP2R1A;MYO5A;ATP2A2;SREBF2;SEPT3
Simple lobule	9/301	0.641785	0.999996	0	0	0.920841	0.408394	RBM39;CADM3;BTG1;PTPRZ1;ZMIZ1;ATN1;VIM;CHGB;ZFP36L1
Simple lobule, granular layer	9/301	0.641785	0.999996	0	0	0.920841	0.408394	RBM39;CADM3;BTG1;PTPRZ1;ZMIZ1;ATN1;VIM;CHGB;ZFP36L1
Striatum dorsal region	9/301	0.641785	0.999996	0	0	0.920841	0.408394	CAP1;RGS4;SCRN1;TTYH1;ACTN1;CDC42EP3;ID4;GATA3;HIST1H1C
Subiculum, dorsal part	9/301	0.641785	0.999996	0	0	0.920841	0.408394	TMEFF1;EIF3L;UNC5C;TCF4;SLIT3;PFN1;SNRNP200;SF3B1;DUSP6
Superior central nucleus raphe	9/301	0.641785	0.999996	0	0	0.920841	0.408394	SLC10A4;YARS;ACLY;YWHAQ;SPP1;GATA3;L1CAM;BCAT1;AP2M1
Superior central nucleus raphe, lateral part	9/301	0.641785	0.999996	0	0	0.920841	0.408394	SLC10A4;YARS;YWHAQ;CEBPG;SPP1;GATA3;L1CAM;BCAT1;AP2M1
Supramammillary nucleus, medial part	9/301	0.641785	0.999996	0	0	0.920841	0.408394	SYT4;IL1RN;DPYSL5;SHC1;DNER;IGF2;S100A6;S100A4;TIMP1
Thalamus, polymodal association cortex related	9/301	0.641785	0.999996	0	0	0.920841	0.408394	RAB3C;RIMS3;SHC1;RGS16;ID4;CTNNB1;UNC5C;PROX1;L1CAM
Triangular nucleus of septum	9/301	0.641785	0.999996	0	0	0.920841	0.408394	SOX2;FADS2;BTG1;TTR;ITGB2;ID4;EBF3;VIM;XPR1
Ventral medial nucleus of the thalamus	9/301	0.641785	0.999996	0	0	0.920841	0.408394	RAB3C;RIMS3;YWHAQ;SHC1;RGS16;RPL27;PROX1;L1CAM;AGRN
Visceral area, layer 6b	9/301	0.641785	0.999996	0	0	0.920841	0.408394	LARP1;GNG2;CNOT1;PLAUR;ILF2;AP2M1;IER3;MTDH;FDFT1
anterior pretectal nucleus, dorsal superficial part	9/301	0.641785	0.999996	0	0	0.920841	0.408394	RSL1D1;NGRN;RPL18A;RGS16;PEA15;WAC;LAPTM5;PROX1;EIF3A
basal plate of p1	9/301	0.641785	0.999996	0	0	0.920841	0.408394	SLC10A4;RET;AHNAK;SDC2;IGF2;SNCG;EBF3;LSS;DLK1
basal plate of p2	9/301	0.641785	0.999996	0	0	0.920841	0.408394	SLC10A4;RET;SDC2;IGF2;EBF3;TMBIM6;LSS;VAMP2;DLK1
basomedial amygdaloid nucleus, posterior part	9/301	0.641785	0.999996	0	0	0.920841	0.408394	MARCKSL1;TSC22D1;CNOT1;YWHAB;STC2;DNER;NR2F1;TARS;AP2M1
caudal zona incerta	9/301	0.641785	0.999996	0	0	0.920841	0.408394	RET;YWHAQ;RPS8;SDC2;IL1B;RPL35A;TMBIM6;LSS;DLK1
central part of MD	9/301	0.641785	0.999996	0	0	0.920841	0.408394	RAB3C;RIMS3;DPYSL5;SHC1;RGS16;STMN4;PROX1;SLC1A5;L1CAM
cerebellar nuclei of CbV	9/301	0.641785	0.999996	0	0	0.920841	0.408394	CD63;BTG1;SHMT2;ITGB2;SOX11;S100A4;HSPG2;PBX1;NEUROG2
core part of DTg	9/301	0.641785	0.999996	0	0	0.920841	0.408394	SOX2;SLC10A4;RGS5;KIF26A;HNRNPA2B1;RPS6;IGFBP2;RPL37A;FDFT1
diencephalon	9/301	0.641785	0.999996	0	0	0.920841	0.408394	RAB3C;CHRNA3;RIMS3;SHC1;RGS16;UNC5C;PROX1;L1CAM;LSS
ethmoid nucleus	9/301	0.641785	0.999996	0	0	0.920841	0.408394	RIMS3;YWHAQ;RGS16;STMN4;S100A4;ARHGEF2;L1CAM;LSS;IER3
hippocampus (cortex Ammonis)	9/301	0.641785	0.999996	0	0	0.920841	0.408394	PARP1;FOXG1;LAPTM5;ISLR2;PLXNA1;CRMP1;TCF4;PFN1;VAMP2
hypothalamic amygdala	9/301	0.641785	0.999996	0	0	0.920841	0.408394	MARCKSL1;RPS19;RPL21;PNOC;DNER;NR2F1;ILF2;SCG2;AP2M1
insular cortex	9/301	0.641785	0.999996	0	0	0.920841	0.408394	ACTR2;TYROBP;GNG2;CNOT1;HNRNPF;LAPTM5;PLAUR;ACTN4;IER3
intercalated amygdaloid nuclei	9/301	0.641785	0.999996	0	0	0.920841	0.408394	TMEFF1;GNG2;RPL21;NR2F1;ILF2;DCAF7;AP2M1;WLS;PRPH
intermediate part of THyB	9/301	0.641785	0.999996	0	0	0.920841	0.408394	CD63;PCSK1N;FCER1G;TRIM28;SDC2;RPL12;CRABP1;S100A6;SOX11
intermediate stratum of ITTh	9/301	0.641785	0.999996	0	0	0.920841	0.408394	RIMS3;YWHAQ;RGS16;STMN4;S100A4;ARHGEF2;L1CAM;LSS;IER3
intermediate stratum of LPrP	9/301	0.641785	0.999996	0	0	0.920841	0.408394	ACTR2;TYROBP;GNG2;YWHAB;ISLR2;HMGCR;ILF2;SREBF2;IER3
intermediate stratum of m2B	9/301	0.641785	0.999996	0	0	0.920841	0.408394	SLC10A4;UNC5B;IL1B;RPL12;DPYSL3;PNOC;PLXNA1;SNCG;EBF3
intermediate tier of thalamus	9/301	0.641785	0.999996	0	0	0.920841	0.408394	CHRNA3;RIMS3;RGS16;CTNNB1;UNC5C;S100A4;PROX1;L1CAM;LSS
isthmic roof plate	9/301	0.641785	0.999996	0	0	0.920841	0.408394	SLC10A4;CD63;FADS2;BTG1;PTPRZ1;SHMT2;PKIA;DBI;VIM
lateral (parvicellular) part of MD	9/301	0.641785	0.999996	0	0	0.920841	0.408394	RAB3C;RIMS3;SHC1;RGS16;ID4;CTNNB1;PROX1;L1CAM;ATF4
lateral anterior hypothalamic nucleus	9/301	0.641785	0.999996	0	0	0.920841	0.408394	RPS15;GAL;PEG10;RGS16;CANX;CIRBP;STMN3;FXYD6;RPS21
lateral subhabenular nucleus	9/301	0.641785	0.999996	0	0	0.920841	0.408394	CHRNA3;YWHAQ;SCRN1;DPYSL5;SDC2;RGS16;CTNNB1;PROX1;L1CAM
laterodorsal nucleus	9/301	0.641785	0.999996	0	0	0.920841	0.408394	CD63;TTR;RGS16;IGFBP2;ITGB2;SPRY4;ID4;UNC5C;CNN3
layer 2 of AOV cortex	9/301	0.641785	0.999996	0	0	0.920841	0.408394	IL1RN;DCX;PTN;YBX1;GATA2;FOXM1;SOX4;VAMP2;AP2M1
layer 2 of LOT	9/301	0.641785	0.999996	0	0	0.920841	0.408394	ACAP3;MARCKSL1;RPL21;LRBA;IL1B;HDGF;SLC1A5;SCG2;AP2M1
layer 3 of OCx	9/301	0.641785	0.999996	0	0	0.920841	0.408394	RGS4;CDKN1A;TNRC18;INSM2;HLA-A;PTN;HMGCR;DUSP6;SMARCA4
layer 6 of FCx	9/301	0.641785	0.999996	0	0	0.920841	0.408394	TMEFF1;ACAP3;LASP1;TYROBP;LRP1;HDLBP;MYO5A;SLC7A1;SEPT3
liminal part of alar r1	9/301	0.641785	0.999996	0	0	0.920841	0.408394	SLC10A4;LGALS1;RPS18;PLXNA1;SNCG;RPS20;RPL37;WHSC1;LCP1
mantle zone of AHy	9/301	0.641785	0.999996	0	0	0.920841	0.408394	MARCKSL1;RPS19;RPL21;PNOC;DNER;NR2F1;ILF2;SCG2;AP2M1
mantle zone of CA	9/301	0.641785	0.999996	0	0	0.920841	0.408394	PARP1;FOXG1;LAPTM5;ISLR2;PLXNA1;CRMP1;TCF4;PFN1;VAMP2
mantle zone of ITTh	9/301	0.641785	0.999996	0	0	0.920841	0.408394	CHRNA3;RIMS3;RGS16;CTNNB1;UNC5C;S100A4;PROX1;L1CAM;LSS
mantle zone of InsCx	9/301	0.641785	0.999996	0	0	0.920841	0.408394	ACTR2;TYROBP;GNG2;CNOT1;HNRNPF;LAPTM5;PLAUR;ACTN4;IER3
mantle zone of SeDg	9/301	0.641785	0.999996	0	0	0.920841	0.408394	VAT1;SLC10A4;GAL;NRG4;PEG10;CRABP1;NNAT;RPS21;GNAI2
mantle zone of THyB-I	9/301	0.641785	0.999996	0	0	0.920841	0.408394	CD63;PCSK1N;FCER1G;TRIM28;SDC2;RPL12;CRABP1;S100A6;SOX11
mantle zone of TPaA	9/301	0.641785	0.999996	0	0	0.920841	0.408394	GAL;PEG10;RGS16;NNAT;FXYD6;RPS21;SCG2;VAT1L;DLK1
mantle zone of m2B	9/301	0.641785	0.999996	0	0	0.920841	0.408394	SLC10A4;RET;SDC2;RPL12;DPYSL3;PNOC;SNCG;EBF3;DLK1
mantle zone of p3B	9/301	0.641785	0.999996	0	0	0.920841	0.408394	SLC10A4;RET;SDC2;IL1B;IGF2;EBF3;TMBIM6;VAMP2;DLK1
mantle zone of r1Lim	9/301	0.641785	0.999996	0	0	0.920841	0.408394	SLC10A4;LGALS1;RPS18;PLXNA1;SNCG;RPS20;RPL37;WHSC1;LCP1
mantle zone of r9Ve	9/301	0.641785	0.999996	0	0	0.920841	0.408394	AHNAK;IGFBP3;EBF3;TAGLN2;PLIN2;UBA1;MVD;YWHAZ;PHOX2A
medial (fastigial) cerebellar nucleus	9/301	0.641785	0.999996	0	0	0.920841	0.408394	CD63;BTG1;SHMT2;ITGB2;SOX11;S100A4;HSPG2;PBX1;NEUROG2
medial (main) part of Med	9/301	0.641785	0.999996	0	0	0.920841	0.408394	CD63;RGS5;RPLP0;IGFBP2;ITGB2;ENPP2;S100A4;HSPG2;PHOX2A
medial amygdala, posterodorsal part	9/301	0.641785	0.999996	0	0	0.920841	0.408394	RPL21;PNOC;DNER;NR2F1;CDH13;ILF2;DBN1;AP2M1;XPR1
mediodorsal nucleus	9/301	0.641785	0.999996	0	0	0.920841	0.408394	RAB3C;RIMS3;SHC1;RGS16;ID4;CTNNB1;PROX1;L1CAM;ATF4
neuropeptide-S nucleus	9/301	0.641785	0.999996	0	0	0.920841	0.408394	SLC10A4;TMEFF1;ACLY;IGF2;SNCG;PLIN2;RPS27A;FDFT1;PHOX2A
oval paracentral nucleus	9/301	0.641785	0.999996	0	0	0.920841	0.408394	RIMS3;YWHAQ;IL1B;RGS16;ITGB2;ARHGEF2;L1CAM;LSS;IER3
parvicellular interstitial nucleus of the posterior commissure	9/301	0.641785	0.999996	0	0	0.920841	0.408394	FADS2;CHRNA3;TUBA1A;RPL27;FAU;AGRN;PRDX6;PFDN5;YWHAG
parvocellular part of r8LRt	9/301	0.641785	0.999996	0	0	0.920841	0.408394	TOP2A;TRIM28;TSC22D1;KIF26A;NRG4;PKIA;IGFBP3;TIMP1;MMP9
periventricular stratum of AOB	9/301	0.641785	0.999996	0	0	0.920841	0.408394	IL1RN;CDKN1A;BTG1;RAB31;KIF26A;IL1B;DCX;SOX4;SMARCA4
periventricular stratum of CoPV	9/301	0.641785	0.999996	0	0	0.920841	0.408394	SQLE;FADS2;TUBA1A;RPL27A;RPL13;FXYD6;AGRN;PRDX6;YWHAG
periventricular stratum of OB	9/301	0.641785	0.999996	0	0	0.920841	0.408394	IL1RN;CDKN1A;BTG1;IL1B;FABP7;CDC42EP3;DCX;SOX4;VAMP2
periventricular stratum of cerebellar vermis	9/301	0.641785	0.999996	0	0	0.920841	0.408394	CADM3;BTG1;PTPRZ1;SPRY4;S100A4;VIM;SNRNP200;PBX1;TBX3
periventricular stratum of r10Lim	9/301	0.641785	0.999996	0	0	0.920841	0.408394	SLC10A4;ACLY;LGALS1;GAL;MSN;PLIN2;MVD;PRDX6;YWHAZ
periventricular stratum of r8Tr	9/301	0.641785	0.999996	0	0	0.920841	0.408394	RGS5;ZNF704;FASN;IGFBP3;MAB21L2;TAGLN2;PLIN2;YWHAZ;PHOX2A
posteromedial visual area	9/301	0.641785	0.999996	0	0	0.920841	0.408394	NGRN;CDKN1A;WDR82;CDC42EP3;TNRC18;PTN;HMGCR;SF3B1;DUSP6
posteromedial visual area, layer 2/3	9/301	0.641785	0.999996	0	0	0.920841	0.408394	NGRN;CDKN1A;TRIM28;CDC42EP3;TNRC18;S100A4;HMGCR;SF3B1;DUSP6
preisthmic tegmentum	9/301	0.641785	0.999996	0	0	0.920841	0.408394	SLC10A4;RET;SDC2;RPL12;PNOC;CEBPG;SNCG;EBF3;DLK1
pretectal tegmentum	9/301	0.641785	0.999996	0	0	0.920841	0.408394	SLC10A4;RET;AHNAK;SDC2;IGF2;SNCG;EBF3;LSS;DLK1
r10 part of vagal motor nucleus	9/301	0.641785	0.999996	0	0	0.920841	0.408394	SLC10A4;ACLY;LGALS1;GAL;MSN;PLIN2;MVD;PRDX6;YWHAZ
r10 portion of the hypoglossal motor nucleus	9/301	0.641785	0.999996	0	0	0.920841	0.408394	SLC10A4;TOP2A;DNAJA1;ACLY;LGALS1;GAL;MSN;PRDX6;YWHAZ
r4 part of reticulotegmental nucleus, shell portion	9/301	0.641785	0.999996	0	0	0.920841	0.408394	APC2;GRN;STXBP1;CAPRIN1;ATP5A1;MAB21L2;SPP1;SLC7A1;ZMPSTE24
r8 (gustatory) part of solitary complex	9/301	0.641785	0.999996	0	0	0.920841	0.408394	RGS5;ZNF704;FASN;IGFBP3;MAB21L2;TAGLN2;PLIN2;YWHAZ;PHOX2A
r9 part of basomedial reticular formation	9/301	0.641785	0.999996	0	0	0.920841	0.408394	TOP2A;YARS;DNAJA1;LGALS1;GDF15;RPL12;MSN;SNCG;MKI67
r9 part of external cuneate nucleus	9/301	0.641785	0.999996	0	0	0.920841	0.408394	VAT1;APC2;IGFBP3;HMGA1;TAGLN2;PLIN2;MVD;YWHAZ;PHOX2A
r9 part of the vestibular column	9/301	0.641785	0.999996	0	0	0.920841	0.408394	AHNAK;IGFBP3;EBF3;TAGLN2;PLIN2;UBA1;MVD;YWHAZ;PHOX2A
rostral secondary prosencephalon	9/301	0.641785	0.999996	0	0	0.920841	0.408394	VAT1;PCSK1N;GAL;TRIM28;PEG10;SDC2;CRABP1;RPS21;PBX1
rostromedial tegmental nucleus	9/301	0.641785	0.999996	0	0	0.920841	0.408394	SLC7A5;GRN;FCER1G;RPS7;YWHAQ;SPP1;RPL37;L1CAM;AP2M1
septodiagonal transition area	9/301	0.641785	0.999996	0	0	0.920841	0.408394	VAT1;SLC10A4;GAL;NRG4;PEG10;CRABP1;NNAT;RPS21;GNAI2
sublayer 6a of CCx	9/301	0.641785	0.999996	0	0	0.920841	0.408394	SQLE;TMEFF1;MYO5A;ATP2A2;SLC7A1;DUSP6;SREBF2;VAMP2;SEPT3
subpallial septum	9/301	0.641785	0.999996	0	0	0.920841	0.408394	SOX2;SLC10A4;SYT4;ALCAM;PEG10;PNOC;ID4;XPR1;GNAI2
superficial stratum of AHy	9/301	0.641785	0.999996	0	0	0.920841	0.408394	MARCKSL1;RPS19;RPL21;PNOC;DNER;NR2F1;ILF2;SCG2;AP2M1
superficial stratum of CA	9/301	0.641785	0.999996	0	0	0.920841	0.408394	PARP1;FOXG1;LAPTM5;ISLR2;PLXNA1;CRMP1;TCF4;PFN1;VAMP2
superficial stratum of InsCx (cortical plate/marginal zone)	9/301	0.641785	0.999996	0	0	0.920841	0.408394	ACTR2;TYROBP;GNG2;CNOT1;HNRNPF;LAPTM5;PLAUR;ACTN4;IER3
superficial stratum of PcPL	9/301	0.641785	0.999996	0	0	0.920841	0.408394	RSL1D1;NGRN;RPL18A;RGS16;PEA15;WAC;LAPTM5;PROX1;EIF3A
superficial stratum of m1B	9/301	0.641785	0.999996	0	0	0.920841	0.408394	SLC10A4;RET;CHRNA3;AHNAK;SDC2;IGF2;SNCG;LSS;DLK1
superficial stratum of r1BM	9/301	0.641785	0.999996	0	0	0.920841	0.408394	IL1RN;GRN;FCER1G;YWHAQ;SDC2;IGFBP3;IGF2;VIM;AP2M1
superficial stratum of r2BM	9/301	0.641785	0.999996	0	0	0.920841	0.408394	SLC7A5;GRN;FCER1G;RPS7;YWHAQ;SPP1;RPL37;L1CAM;AP2M1
superficial stratum of r9Ve	9/301	0.641785	0.999996	0	0	0.920841	0.408394	VAT1;APC2;IGFBP3;HMGA1;TAGLN2;PLIN2;MVD;YWHAZ;PHOX2A
terminal paraventricular area of THyA	9/301	0.641785	0.999996	0	0	0.920841	0.408394	GAL;PEG10;RGS16;NNAT;FXYD6;RPS21;SCG2;VAT1L;DLK1
ventral linear nucleus	9/301	0.641785	0.999996	0	0	0.920841	0.408394	RIMS3;YWHAQ;IL1B;RGS16;UNC5C;L1CAM;LSS;IER3;DDR2
ventral posterior parvicellular nucleus	9/301	0.641785	0.999996	0	0	0.920841	0.408394	RIMS3;YWHAQ;SHC1;IL1B;RGS16;PROX1;L1CAM;AGRN;LSS
ventrolateral part of VMH	9/301	0.641785	0.999996	0	0	0.920841	0.408394	VAT1;PCSK1N;FCER1G;RPS19;TRIM28;PEG10;SDC2;STMN3;MKI67
white matter of cerebellar vermis	9/301	0.641785	0.999996	0	0	0.920841	0.408394	CADM3;BTG1;PTPRZ1;SPRY4;S100A4;VIM;SNRNP200;PBX1;TBX3
Thalamus	10/334	0.642988	0.999996	0	0	0.922001	0.407183	RAB3C;RIMS3;SHC1;RGS16;ID4;CTNNB1;UNC5C;GATA3;PROX1;L1CAM
Taenia tecta	13/448	0.694575	0.999996	0	0	0.891744	0.325001	TOP2A;FCER1G;GDF15;CRABP1;SURF4;TMEFF1;DCX;FLNA;CDH13;S100A4;SOX4;NEUROG2;DDR2
Field CA3, stratum oriens	10/349	0.696067	0.999996	0	0	0.88051	0.319017	KIF26A;FOXG1;STC2;IGFBP3;IGFBP2;LAPTM5;ISLR2;PLXNA1;UNC5C;PFN1
Claustrum	11/386	0.707939	0.999996	0	0	0.875296	0.302325	ACAP3;ACTR2;TYROBP;GNG2;RPL21;ISLR2;CDH13;HMGCR;ILF2;SREBF2;IER3
Anteromedial nucleus	10/357	0.722289	0.999996	0	0	0.859848	0.279734	RAB3C;RIMS3;SHC1;RGS16;ID4;CTNNB1;PROX1;L1CAM;FOXM1;AP2M1
A4 noradrenergic cell group	8/301	0.761566	0.999996	0	0	0.814412	0.221829	CD63;RGS5;TTR;IGFBP2;ITGB2;DBI;WLS;PHOX2A
Accessory facial motor nucleus	8/301	0.761566	0.999996	0	0	0.814412	0.221829	SLC10A4;SLC7A5;LGALS1;YWHAQ;SNCG;LCP1;MMP9;PRPH
Agranular insular area, ventral part, layer 5	8/301	0.761566	0.999996	0	0	0.814412	0.221829	ACTR2;TYROBP;GNG2;CNOT1;ISLR2;HMGCR;XPR1;PRPH
Ammon's horn	8/301	0.761566	0.999996	0	0	0.814412	0.221829	PARP1;FOXG1;ISLR2;PLXNA1;CRMP1;TCF4;PFN1;VAMP2
Anterolateral visual area, layer 5	8/301	0.761566	0.999996	0	0	0.814412	0.221829	LARP1;PLAUR;INSM2;PTN;SLC1A5;HMGCR;RPS27A;TPT1
Anteromedial nucleus, dorsal part	8/301	0.761566	0.999996	0	0	0.814412	0.221829	RAB3C;RIMS3;SHC1;RGS16;ID4;PROX1;L1CAM;AP2M1
Anteromedial nucleus, ventral part	8/301	0.761566	0.999996	0	0	0.814412	0.221829	RAB3C;RIMS3;SHC1;RGS16;ID4;PROX1;L1CAM;AP2M1
Anteroventral preoptic nucleus	8/301	0.761566	0.999996	0	0	0.814412	0.221829	FCER1G;GAL;NRG4;PEG10;S100A4;UBA1;PBX1;SMARCA4
Basolateral amygdalar nucleus, anterior part	8/301	0.761566	0.999996	0	0	0.814412	0.221829	LARP1;GNG2;CNOT1;NR2F1;CNTN1;PLAUR;ILF2;AP2M1
Basolateral amygdalar nucleus, ventral part	8/301	0.761566	0.999996	0	0	0.814412	0.221829	MARCKSL1;CNOT1;STC2;NR2F1;PLAUR;PLIN2;DCAF7;AP2M1
Central lateral nucleus of the thalamus	8/301	0.761566	0.999996	0	0	0.814412	0.221829	RIMS3;RGS16;CTNNB1;TARS;PROX1;ARHGEF2;L1CAM;IER3
Copula pyramidis	8/301	0.761566	0.999996	0	0	0.814412	0.221829	CADM3;BTG1;ZMIZ1;ITGB2;ATN1;VIM;SNRNP200;ZFP36L1
Copula pyramidis, granular layer	8/301	0.761566	0.999996	0	0	0.814412	0.221829	CADM3;BTG1;ITGB2;ATN1;VIM;SNRNP200;PBX1;ZFP36L1
Copula pyramidis, molecular layer	8/301	0.761566	0.999996	0	0	0.814412	0.221829	CADM3;BTG1;ZMIZ1;ITGB2;ATN1;VIM;SNRNP200;ZFP36L1
Cortical amygdalar area, anterior part, layer 1	8/301	0.761566	0.999996	0	0	0.814412	0.221829	MARCKSL1;TRIM28;SHMT2;LRBA;TRIB3;GATA3;SMC4;PRPH
Cortical amygdalar area, posterior part, lateral zone, layer 3	8/301	0.761566	0.999996	0	0	0.814412	0.221829	MARCKSL1;TSC22D1;RPS7;CNOT1;STC2;PKIA;NR2F1;AP2M1
Cortical amygdalar area, posterior part, medial zone	8/301	0.761566	0.999996	0	0	0.814412	0.221829	MARCKSL1;TSC22D1;CNOT1;PKIA;PEA15;NR2F1;CDH13;AP2M1
Cortical subplate	8/301	0.761566	0.999996	0	0	0.814412	0.221829	GNG2;CNOT1;ARHGDIA;NR2F1;GATA3;HMGCR;ILF2;PRPH
Crus 2	8/301	0.761566	0.999996	0	0	0.814412	0.221829	CADM3;H1F0;BTG1;PTPRZ1;ZMIZ1;STMN2;ATN1;ZFP36L1
Crus 2, granular layer	8/301	0.761566	0.999996	0	0	0.814412	0.221829	CADM3;H1F0;BTG1;PTPRZ1;ZMIZ1;STMN2;ATN1;ZFP36L1
Dentate gyrus, molecular layer	8/301	0.761566	0.999996	0	0	0.814412	0.221829	NCOR2;BRD2;YWHAB;PKIA;RPL22;ISLR2;PROX1;XPR1
Dorsal part of the lateral geniculate complex	8/301	0.761566	0.999996	0	0	0.814412	0.221829	RGS16;LONP1;UNC5C;GATA3;HNRNPC;L1CAM;BAZ1B;CLASP2
Fastigial nucleus	8/301	0.761566	0.999996	0	0	0.814412	0.221829	CD63;BTG1;ITGB2;SOX11;S100A4;HSPG2;PBX1;NEUROG2
Field CA3, pyramidal layer	8/301	0.761566	0.999996	0	0	0.814412	0.221829	RPS7;FOXG1;STC2;RPL22;ISLR2;UNC5C;PFN1;VAMP2
Field CA3, stratum lucidum	8/301	0.761566	0.999996	0	0	0.814412	0.221829	RPS7;FOXG1;STC2;ISLR2;PLXNA1;UNC5C;PFN1;VAMP2
Globus pallidus, external segment	8/301	0.761566	0.999996	0	0	0.814412	0.221829	RAB31;UNC5B;CCL20;CRABP1;CDC42EP3;GATA3;LSS;PBX1
Gustatory areas	8/301	0.761566	0.999996	0	0	0.814412	0.221829	ACTR2;LARP1;TYROBP;CNOT1;HNRNPF;PLAUR;ACTN4;PRPH
Infralimbic area, layer 2	8/301	0.761566	0.999996	0	0	0.814412	0.221829	FCER1G;RAB31;GDF15;CRABP1;SOX11;FOXM1;NEUROG2;DDR2
Interstitial nucleus of Cajal	8/301	0.761566	0.999996	0	0	0.814412	0.221829	RET;UNC5B;PNOC;EBF3;AGRN;BCAT1;SLC38A2;LSS
Lateral habenula	8/301	0.761566	0.999996	0	0	0.814412	0.221829	CD63;CHRNA3;SCRN1;EIF3L;FABP7;RGS16;PROX1;XPR1
Lateral reticular nucleus, magnocellular part	8/301	0.761566	0.999996	0	0	0.814412	0.221829	TOP2A;SYT4;TRIM28;NRG4;TARS;S100A4;MKI67;EIF4B
Lateral septal nucleus, caudal (caudodorsal) part	8/301	0.761566	0.999996	0	0	0.814412	0.221829	SOX2;MMP14;PNOC;ENC1;ID4;DBI;PTN;B2M
Lateral terminal nucleus of the accessory optic tract	8/301	0.761566	0.999996	0	0	0.814412	0.221829	RBM39;AHNAK;YWHAQ;CCL20;FOXG1;STC2;RPL11;DCX
Main olfactory bulb, granule layer	8/301	0.761566	0.999996	0	0	0.814412	0.221829	IL1RN;CDKN1A;BTG1;FABP7;CDC42EP3;DCX;SOX4;VAMP2
Medial amygdalar nucleus, posterodorsal part, sublayer b	8/301	0.761566	0.999996	0	0	0.814412	0.221829	FADS2;TTR;PNOC;DNER;NR2F1;GATA3;XPR1;PRRC2A
Medial group of the dorsal thalamus	8/301	0.761566	0.999996	0	0	0.814412	0.221829	RAB3C;RIMS3;DPYSL5;SHC1;RGS16;CTNNB1;PROX1;L1CAM
Mediodorsal nucleus of thalamus	8/301	0.761566	0.999996	0	0	0.814412	0.221829	RAB3C;RIMS3;SHC1;RGS16;ID4;CTNNB1;PROX1;L1CAM
Mediodorsal nucleus of the thalamus, lateral part	8/301	0.761566	0.999996	0	0	0.814412	0.221829	RAB3C;RIMS3;SHC1;RGS16;ID4;CTNNB1;PROX1;L1CAM
Mediodorsal nucleus of the thalamus, medial part	8/301	0.761566	0.999996	0	0	0.814412	0.221829	RAB3C;RIMS3;DPYSL5;SHC1;RGS16;CTNNB1;PROX1;L1CAM
Midbrain reticular nucleus, retrorubral area	8/301	0.761566	0.999996	0	0	0.814412	0.221829	SLC10A4;RET;AHNAK;APEX1;SNCG;RPS20;GATA3;AP2M1
Nodulus (X)	8/301	0.761566	0.999996	0	0	0.814412	0.221829	CD63;RGS5;TTR;AHNAK;IGFBP3;ITGB2;VIM;HIST1H1C
Nodulus (X), granular layer	8/301	0.761566	0.999996	0	0	0.814412	0.221829	CD63;RGS5;TTR;IGFBP3;ITGB2;VIM;HSPG2;HIST1H1C
OB granular layer	8/301	0.761566	0.999996	0	0	0.814412	0.221829	IL1RN;CDKN1A;BTG1;IL1B;FABP7;CDC42EP3;DCX;SOX4
Orbital area, medial part, layer 5	8/301	0.761566	0.999996	0	0	0.814412	0.221829	IL1RN;CDKN1A;CRABP1;S100A6;SH3BGRL3;HN1;ADNP;ATP9A
Orbital area, medial part, layer 6a	8/301	0.761566	0.999996	0	0	0.814412	0.221829	CDKN1A;RBFOX2;PPT1;S100A6;ATP2A2;SH3BGRL3;HDGF;ADNP
Orbital area, ventrolateral part, layer 5	8/301	0.761566	0.999996	0	0	0.814412	0.221829	IL1RN;CDKN1A;TYROBP;LRP1;RPS18;S100A6;PTN;SREBF2
Paramedian lobule, molecular layer	8/301	0.761566	0.999996	0	0	0.814412	0.221829	CADM3;BTG1;PTPRZ1;ZMIZ1;ATN1;VIM;SNRNP200;ZFP36L1
Piriform-amygdalar area, polymorph layer	8/301	0.761566	0.999996	0	0	0.814412	0.221829	MARCKSL1;TRIM28;TSC22D1;CNOT1;STC2;PKIA;PLIN2;AP2M1
Posterolateral visual area, layer 2/3	8/301	0.761566	0.999996	0	0	0.814412	0.221829	RGS4;LASP1;LARP1;PLAUR;INSM2;PTN;DUSP6;PHOX2A
Posterolateral visual area, layer 6a	8/301	0.761566	0.999996	0	0	0.814412	0.221829	CDKN1A;SSR2;PLAUR;CTNNB1;MVD;INSM2;GATA3;SLC1A5
Prelimbic area	8/301	0.761566	0.999996	0	0	0.814412	0.221829	IL1RN;KIF5C;S100A6;SH3BGRL3;SLC3A2;NEUROG2;ATP9A;SMARCA4
Prelimbic area, layer 6a	8/301	0.761566	0.999996	0	0	0.814412	0.221829	RBFOX2;S100A6;CNTN1;MYO5A;ATP2A2;SH3BGRL3;ADNP;SEPT3
Primary somatosensory area, barrel field, layer 6b	8/301	0.761566	0.999996	0	0	0.814412	0.221829	ACTR2;LARP1;KIF5C;PLAUR;MVD;ACTN4;ILF2;IER3
Primary somatosensory area, lower limb, layer 5	8/301	0.761566	0.999996	0	0	0.814412	0.221829	NGRN;HDLBP;ATP2A2;SH3BGRL3;INSM2;PTN;HMGCR;SLC7A1
Primary somatosensory area, lower limb, layer 6a	8/301	0.761566	0.999996	0	0	0.814412	0.221829	TMEFF1;NGRN;SCRN1;LRP1;HDLBP;MYO5A;SLC7A1;PRPF8
Primary somatosensory area, lower limb, layer 6b	8/301	0.761566	0.999996	0	0	0.814412	0.221829	TMEFF1;SCRN1;LRP1;HDLBP;MYO5A;SLC1A5;SLC7A1;PRPF8
Primary somatosensory area, mouth	8/301	0.761566	0.999996	0	0	0.814412	0.221829	LARP1;TYROBP;HNRNPF;PLAUR;INSM2;ACTN4;ARHGEF2;SMC4
Primary somatosensory area, mouth, layer 5	8/301	0.761566	0.999996	0	0	0.814412	0.221829	LASP1;LARP1;TYROBP;CIRBP;PLAUR;INSM2;PTN;B2M
Primary somatosensory area, mouth, layer 6a	8/301	0.761566	0.999996	0	0	0.814412	0.221829	TMEFF1;ACAP3;LASP1;LARP1;TYROBP;KIF5C;PPT1;HDLBP
Primary somatosensory area, nose, layer 6a	8/301	0.761566	0.999996	0	0	0.814412	0.221829	LASP1;LARP1;TYROBP;HNRNPF;PPT1;PLAUR;ACTN4;ILF2
Primary somatosensory area, trunk, layer 4	8/301	0.761566	0.999996	0	0	0.814412	0.221829	RGS4;CCL20;ENC1;ENPP2;DCX;TNRC18;INSM2;PTN
Primary somatosensory area, unassigned	8/301	0.761566	0.999996	0	0	0.814412	0.221829	LARP1;HNRNPF;PLAUR;INSM2;ACTN4;ARHGEF2;PTN;PRPH
Primary somatosensory area, unassigned, layer 6b	8/301	0.761566	0.999996	0	0	0.814412	0.221829	TMEFF1;ACAP3;IL1RN;LRP1;FASN;PLAUR;MVD;ILF2
Primary somatosensory area, upper limb, layer 6b	8/301	0.761566	0.999996	0	0	0.814412	0.221829	TMEFF1;ACAP3;LRP1;KIF5C;FASN;HDLBP;MYO5A;SLC7A1
Primary visual area, layer 4	8/301	0.761566	0.999996	0	0	0.814412	0.221829	CDKN1A;LASP1;CCL20;TNRC18;INSM2;PTN;HMGCR;DUSP6
Subparafascicular nucleus	8/301	0.761566	0.999996	0	0	0.814412	0.221829	RAB3C;RIMS3;YWHAQ;RGS16;RPL24;GATA3;SCG2;LSS
Substantia nigra, reticular part	8/301	0.761566	0.999996	0	0	0.814412	0.221829	SLC10A4;GRN;AHNAK;STC2;PABPC4;IGF2;TRIB3;MMP9
Thalamus, sensory-motor cortex related	8/301	0.761566	0.999996	0	0	0.814412	0.221829	RIMS3;RGS16;NR2F1;MYO5A;UNC5C;GATA3;PROX1;L1CAM
Tuberomammillary nucleus	8/301	0.761566	0.999996	0	0	0.814412	0.221829	TRIM28;AHNAK;RPL12;S100A6;NCAM1;TIMP1;VIM;FOXM1
alar plate of p2 (alar thalamus)	8/301	0.761566	0.999996	0	0	0.814412	0.221829	RIMS3;SHC1;RGS16;ID4;CTNNB1;UNC5C;PROX1;L1CAM
anterior olfactory area, ventral part	8/301	0.761566	0.999996	0	0	0.814412	0.221829	IL1RN;KIF26A;DCX;PTN;YBX1;GATA2;SOX4;VAMP2
basal plate of p3	8/301	0.761566	0.999996	0	0	0.814412	0.221829	SLC10A4;RET;SDC2;PABPC4;IL1B;IGF2;EBF3;TMBIM6
basolateral amygdaloid nucleus, anterior part	8/301	0.761566	0.999996	0	0	0.814412	0.221829	DNAJA1;LARP1;CNOT1;NR2F1;CNTN1;PLAUR;ILF2;AP2M1
basomedial amygdaloid nucleus, anterior part	8/301	0.761566	0.999996	0	0	0.814412	0.221829	MARCKSL1;CNOT1;STC2;NR2F1;ILF2;DCAF7;AP2M1;PRPH
caudal interpeduncular nucleus	8/301	0.761566	0.999996	0	0	0.814412	0.221829	SLC7A5;IL1RN;GRN;FCER1G;YWHAQ;IGFBP3;SPP1;AP2M1
central lateral nucleus	8/301	0.761566	0.999996	0	0	0.814412	0.221829	RIMS3;RGS16;SPRY4;ID4;CTNNB1;PROX1;L1CAM;IER3
cerebellar white matter	8/301	0.761566	0.999996	0	0	0.814412	0.221829	CADM3;BTG1;PTPRZ1;ZMIZ1;SPRY4;STMN2;ATN1;ZFP36L1
deep gray layer of SC	8/301	0.761566	0.999996	0	0	0.814412	0.221829	SLC10A4;RPS8;STXBP1;TTC3;PLXNA1;SNCG;EBF3;DDR2
deep white layer of SC	8/301	0.761566	0.999996	0	0	0.814412	0.221829	SLC10A4;UNC5B;RPS8;STXBP1;TTC3;PLXNA1;SNCG;DDR2
dorsal entopeduncular nucleus	8/301	0.761566	0.999996	0	0	0.814412	0.221829	RPS15;VAT1;NGRN;RAB31;PEG10;IGF2;TMBIM6;RPS21
dorsal part of CoP	8/301	0.761566	0.999996	0	0	0.814412	0.221829	RSL1D1;CHRNA3;RPL18A;PKIA;SPRY4;RPL27;PROX1;PRRC2A
dorsal part of m1A	8/301	0.761566	0.999996	0	0	0.814412	0.221829	CCND1;RPS8;RPL27A;PKIA;RPL37A;DDX21;SNCG;RPS24
dorsal periolivary nucleus	8/301	0.761566	0.999996	0	0	0.814412	0.221829	SLC7A5;LGALS1;YWHAQ;LRBA;SPP1;TARS;HLA-A;LCP1
dorsofrontal pretectal nucleus	8/301	0.761566	0.999996	0	0	0.814412	0.221829	CHRNA3;YWHAQ;FABP7;RGS16;CTNNB1;PROX1;L1CAM;YWHAG
external globus pallidum	8/301	0.761566	0.999996	0	0	0.814412	0.221829	RGS4;RAB31;TTYH1;ACTN1;CRABP1;CDC42EP3;LSS;PBX1
intermediate stratum of JcPL	8/301	0.761566	0.999996	0	0	0.814412	0.221829	RSL1D1;NGRN;CHRNA3;RPL18A;PKIA;RGS16;LAPTM5;PROX1
intermediate stratum of PcPD	8/301	0.761566	0.999996	0	0	0.814412	0.221829	CHRNA3;YWHAQ;FABP7;RGS16;CTNNB1;PROX1;L1CAM;YWHAG
intermediate stratum of p2ZL	8/301	0.761566	0.999996	0	0	0.814412	0.221829	RAB3C;RIMS3;IL1B;RGS16;NR2F1;RPL27;PROX1;L1CAM
intermediate stratum of r1BL	8/301	0.761566	0.999996	0	0	0.814412	0.221829	SLC10A4;MMP14;AHNAK;RPS18;NRG4;PLXNA1;SNCG;RPL37
intermediate stratum of r1BM	8/301	0.761566	0.999996	0	0	0.814412	0.221829	SLC10A4;GNG2;DPYSL5;PSAT1;SDC2;PNOC;CEBPG;MVD
intermediate stratum of r2BL	8/301	0.761566	0.999996	0	0	0.814412	0.221829	VAT1;SLC10A4;YARS;GAL;SPP1;SNCG;AGRN;PHOX2A
intermedioposterior nucleus	8/301	0.761566	0.999996	0	0	0.814412	0.221829	RSL1D1;NGRN;RGS16;WAC;S100A4;PROX1;L1CAM;EIF3A
internal granular layer of CbHCx	8/301	0.761566	0.999996	0	0	0.814412	0.221829	CADM3;BTG1;PTPRZ1;ZMIZ1;SPRY4;ATN1;VIM;ZFP36L1
interstitial nucleus of the zona limitans	8/301	0.761566	0.999996	0	0	0.814412	0.221829	RAB3C;RIMS3;IL1B;RGS16;NR2F1;RPL27;PROX1;L1CAM
island of Calleja major	8/301	0.761566	0.999996	0	0	0.814412	0.221829	ALCAM;TSC22D1;PEG10;ACTN1;DCX;GATA2;FOXM1;PHLDA1
juxtacommissural pretectal domain	8/301	0.761566	0.999996	0	0	0.814412	0.221829	NGRN;CHRNA3;RPL27A;PKIA;RGS16;LAPTM5;PROX1;PRDX6
lateral part of JcP	8/301	0.761566	0.999996	0	0	0.814412	0.221829	RSL1D1;NGRN;CHRNA3;RPL18A;PKIA;RGS16;LAPTM5;PROX1
lateral terminal nucleus of the accessory optic tract, lateral part	8/301	0.761566	0.999996	0	0	0.814412	0.221829	SPARC;RPL18A;SHMT2;GDF15;PKIA;LAPTM5;PROX1;P4HB
laterostriatal stripe	8/301	0.761566	0.999996	0	0	0.814412	0.221829	CAP1;RGS4;ACTN1;CDC42EP3;ID4;MYH9;HMGCR;PRPH
layer 2 of PrS	8/301	0.761566	0.999996	0	0	0.814412	0.221829	HNRNPK;AHNAK;PKIA;IGF2;TCF4;PROX1;SNRNP200;B2M
layer 4 of InsCx	8/301	0.761566	0.999996	0	0	0.814412	0.221829	ACTR2;LASP1;LARP1;CNOT1;HNRNPF;ACTN4;PTN;PRPH
layer 5 of PrS	8/301	0.761566	0.999996	0	0	0.814412	0.221829	TMEFF1;HNRNPK;RPL22;UNC5C;TCF4;SLIT3;ADNP;SNRNP200
layer 6 of PCx	8/301	0.761566	0.999996	0	0	0.814412	0.221829	LASP1;LRP1;KIF5C;PPT1;HDLBP;MYO5A;ATP2A2;IER3
layer 6b of PaS	8/301	0.761566	0.999996	0	0	0.814412	0.221829	TOP2A;CAP1;CDKN1A;STC2;NR2F1;HDGF;TCF4;ADNP
m1B part of the periaqueductal gray	8/301	0.761566	0.999996	0	0	0.814412	0.221829	VAT1;SLC10A4;RET;ACLY;LGALS1;FAU;BCAT1;AP2M1
m1Lim (VL) part of the periaqueductal gray	8/301	0.761566	0.999996	0	0	0.814412	0.221829	RPL30;PEG10;PNOC;SNCG;EBF3;MAPT;PRDX6;AP2M1
m2 basal plate	8/301	0.761566	0.999996	0	0	0.814412	0.221829	SLC10A4;RET;SDC2;RPL12;CEBPG;SNCG;EBF3;DLK1
m2 part of pararubral nucleus	8/301	0.761566	0.999996	0	0	0.814412	0.221829	SLC10A4;RET;IL1B;RPL12;DPYSL3;PNOC;SNCG;AP2M1
magnocellular diagonal band nucleus	8/301	0.761566	0.999996	0	0	0.814412	0.221829	SOX2;ACAP3;MARCKSL1;RPL21;CNTN1;STMN3;SLC1A5;AP2M1
mantle zone of AOV	8/301	0.761566	0.999996	0	0	0.814412	0.221829	IL1RN;KIF26A;DCX;PTN;YBX1;GATA2;SOX4;VAMP2
mantle zone of CoPD	8/301	0.761566	0.999996	0	0	0.814412	0.221829	RSL1D1;CHRNA3;RPL18A;PKIA;SPRY4;RPL27;PROX1;PRRC2A
mantle zone of JcPL	8/301	0.761566	0.999996	0	0	0.814412	0.221829	RSL1D1;NGRN;CHRNA3;RPL18A;PKIA;RGS16;LAPTM5;PROX1
mantle zone of m1AD	8/301	0.761566	0.999996	0	0	0.814412	0.221829	CCND1;RPS8;RPL27A;PKIA;RPL37A;DDX21;SNCG;RPS24
mantle zone of r1Tr	8/301	0.761566	0.999996	0	0	0.814412	0.221829	SLC10A4;LGALS1;RPS18;SPP1;RPS20;WHSC1;NEUROG2;ATP9A
medial amygdala, anteroventral part	8/301	0.761566	0.999996	0	0	0.814412	0.221829	ACAP3;MARCKSL1;RPL21;LRBA;NR2F1;HDGF;SCG2;AP2M1
medial basal reticular formation of m1	8/301	0.761566	0.999996	0	0	0.814412	0.221829	SLC10A4;RET;UNC5B;PSAT1;IL1B;PNOC;EBF3;BCAT1
medial pallium (hippocampal allocortex)	8/301	0.761566	0.999996	0	0	0.814412	0.221829	FOXG1;RPL22;LAPTM5;ISLR2;TCF4;SLIT3;PROX1;PFN1
medial part of the lateral habenular nucleus	8/301	0.761566	0.999996	0	0	0.814412	0.221829	CD63;CHRNA3;SCRN1;FABP7;RGS16;ID4;CTNNB1;PROX1
nucleus of Barrington	8/301	0.761566	0.999996	0	0	0.814412	0.221829	SLC10A4;TMEFF1;ACLY;RPL12;EBF3;PLIN2;NCAM1;PHOX2A
optic fiber layer of SC	8/301	0.761566	0.999996	0	0	0.814412	0.221829	CHRNA3;GDF15;S100A6;CTNNB1;RPL27;SMC4;NEUROG2;SMARCA4
p1 part of parabrachial pigmented nucleus	8/301	0.761566	0.999996	0	0	0.814412	0.221829	SLC10A4;RET;YWHAQ;SDC2;SNCG;AP2M1;DLK1;FDFT1
pallium	8/301	0.761566	0.999996	0	0	0.814412	0.221829	IL1RN;ENC1;GNB1;DCX;TCF4;PTN;HMGCR;DUSP6
periventricular stratum of CbH	8/301	0.761566	0.999996	0	0	0.814412	0.221829	CADM3;BTG1;PTPRZ1;ZMIZ1;SPRY4;STMN2;ATN1;ZFP36L1
periventricular stratum of SC	8/301	0.761566	0.999996	0	0	0.814412	0.221829	SLC10A4;UNC5B;RPS8;STXBP1;TTC3;PLXNA1;SNCG;DDR2
periventricular stratum of m1AL	8/301	0.761566	0.999996	0	0	0.814412	0.221829	UNC5B;RPS8;STXBP1;TTC3;HMGA1;SNCG;EBF3;RPL26
periventricular stratum of m1B	8/301	0.761566	0.999996	0	0	0.814412	0.221829	VAT1;SLC10A4;RET;ACLY;LGALS1;FAU;BCAT1;AP2M1
periventricular stratum of m1Lim	8/301	0.761566	0.999996	0	0	0.814412	0.221829	RPL30;PEG10;PNOC;SNCG;EBF3;MAPT;PRDX6;AP2M1
periventricular stratum of r4Ve	8/301	0.761566	0.999996	0	0	0.814412	0.221829	CD63;RGS5;TTR;IGFBP2;ITGB2;DBI;WLS;PHOX2A
periventricular stratum of r5Ve	8/301	0.761566	0.999996	0	0	0.814412	0.221829	RGS5;TTR;PRKDC;IGFBP2;ITGB2;SOX11;WLS;PHOX2A
periventricular stratum of r9Ve	8/301	0.761566	0.999996	0	0	0.814412	0.221829	VAT1;IGFBP3;HMGA1;PLIN2;MVD;YWHAZ;TBX3;PHOX2A
posterior intralaminar nucleus	8/301	0.761566	0.999996	0	0	0.814412	0.221829	RIMS3;YWHAQ;RGS16;STMN4;ARHGEF2;L1CAM;LSS;IER3
posterior tegmental nucleus	8/301	0.761566	0.999996	0	0	0.814412	0.221829	SLC10A4;YARS;RGS5;YWHAQ;SDC2;PNOC;MVD;AP2M1
posteromedial cortical amygdaloid area	8/301	0.761566	0.999996	0	0	0.814412	0.221829	MARCKSL1;TSC22D1;RPS7;SHMT2;CNOT1;PKIA;NR2F1;CDH13
posteromedial visual area, layer 4	8/301	0.761566	0.999996	0	0	0.814412	0.221829	NGRN;CDKN1A;WDR82;TNRC18;PTN;HMGCR;YWHAZ;DUSP6
prethalamic tegmentum	8/301	0.761566	0.999996	0	0	0.814412	0.221829	SLC10A4;RET;SDC2;PABPC4;IL1B;IGF2;EBF3;TMBIM6
r1 part of basolateral reticular formation	8/301	0.761566	0.999996	0	0	0.814412	0.221829	SLC10A4;MMP14;AHNAK;RPS18;NRG4;PLXNA1;SNCG;RPL37
r1 part of basomedial reticular formation	8/301	0.761566	0.999996	0	0	0.814412	0.221829	SLC10A4;SLC7A5;YWHAQ;UNC5B;CRABP1;SPP1;LSS;SMARCA4
r1 part of dorsal raphe nucleus	8/301	0.761566	0.999996	0	0	0.814412	0.221829	SOX2;SLC10A4;RGS5;ACLY;KIF26A;RPL37A;MVD;FDFT1
r1 part of lateral pontine nuclei	8/301	0.761566	0.999996	0	0	0.814412	0.221829	GRN;AHNAK;NRG4;IGF2;LAPTM5;TARS;RPS13;SMARCA4
r1 part of trigeminal sensory column	8/301	0.761566	0.999996	0	0	0.814412	0.221829	SLC10A4;LGALS1;RPS18;SPP1;RPS20;WHSC1;NEUROG2;ATP9A
r10 part of external cuneate nucleus	8/301	0.761566	0.999996	0	0	0.814412	0.221829	VAT1;CHRNA3;IGFBP3;PLIN2;MVD;PFN1;SLC7A1;YWHAZ
r2 part of prepontine raphe nucleus	8/301	0.761566	0.999996	0	0	0.814412	0.221829	SLC10A4;YARS;YWHAQ;SPP1;RPL26;AGRN;YWHAZ;AP2M1
r4 part of parvocellular medial vestibular nucleus	8/301	0.761566	0.999996	0	0	0.814412	0.221829	CD63;RGS5;TTR;IGFBP2;ITGB2;DBI;WLS;PHOX2A
r5 part of parvocellular medial vestibular nucleus	8/301	0.761566	0.999996	0	0	0.814412	0.221829	RGS5;TTR;PRKDC;IGFBP2;ITGB2;SOX11;WLS;PHOX2A
r6 alar plate	8/301	0.761566	0.999996	0	0	0.814412	0.221829	SLC10A4;ACLY;LGALS1;NRG4;RPL12;MSN;SOX11;EIF4B
r7 part of nucleus prepositus	8/301	0.761566	0.999996	0	0	0.814412	0.221829	RGS5;SYT4;TTR;IGFBP3;MAB21L2;SNCG;FAU;PBX1
r8 portion of the hypoglossal motor nucleus	8/301	0.761566	0.999996	0	0	0.814412	0.221829	ACLY;LGALS1;RPL12;IGFBP3;MAB21L2;MSN;FAU;PBX1
r9 part of parvocellular medial vestibular nucleus	8/301	0.761566	0.999996	0	0	0.814412	0.221829	VAT1;IGFBP3;HMGA1;PLIN2;MVD;YWHAZ;TBX3;PHOX2A
r9 part of the lateral reticular nucleus	8/301	0.761566	0.999996	0	0	0.814412	0.221829	TOP2A;SYT4;TRIM28;NRG4;IL1B;TARS;S100A4;EIF4B
red nucleus, parvicellular part	8/301	0.761566	0.999996	0	0	0.814412	0.221829	SLC10A4;RET;CCT3;SLC38A1;YWHAQ;SDC2;SNCG;LSS
reticular formation of JcPL	8/301	0.761566	0.999996	0	0	0.814412	0.221829	RSL1D1;NGRN;RPL18A;GDF15;PKIA;RGS16;LAPTM5;PROX1
reticular formation of basal m2	8/301	0.761566	0.999996	0	0	0.814412	0.221829	SLC10A4;UNC5B;PSAT1;RPL12;PLXNA1;EBF3;MAGED2;YWHAZ
rostral interpeduncular nucleus	8/301	0.761566	0.999996	0	0	0.814412	0.221829	IL1RN;GRN;FCER1G;YWHAQ;SDC2;IGFBP3;IGF2;VIM
superficial stratum of AOV	8/301	0.761566	0.999996	0	0	0.814412	0.221829	IL1RN;KIF26A;DCX;PTN;YBX1;GATA2;SOX4;VAMP2
superficial stratum of CoPD	8/301	0.761566	0.999996	0	0	0.814412	0.221829	RSL1D1;RPL18A;PKIA;SPRY4;ISLR2;PROX1;XPR1;PRRC2A
superficial stratum of CoPL	8/301	0.761566	0.999996	0	0	0.814412	0.221829	SPARC;RPL18A;SHMT2;GDF15;PKIA;LAPTM5;PROX1;P4HB
superficial stratum of PPaA	8/301	0.761566	0.999996	0	0	0.814412	0.221829	RPS15;VAT1;NGRN;RAB31;PEG10;IGF2;TMBIM6;RPS21
superficial stratum of p1B	8/301	0.761566	0.999996	0	0	0.814412	0.221829	SLC10A4;GRN;AHNAK;SDC2;PABPC4;IGF2;TIMP1;VIM
superficial stratum of r10Ve	8/301	0.761566	0.999996	0	0	0.814412	0.221829	VAT1;CHRNA3;IGFBP3;PLIN2;MVD;PFN1;SLC7A1;YWHAZ
superficial stratum of r1BI	8/301	0.761566	0.999996	0	0	0.814412	0.221829	GRN;AHNAK;NRG4;IGF2;LAPTM5;TARS;RPS13;SMARCA4
superficial stratum of r5Lim	8/301	0.761566	0.999996	0	0	0.814412	0.221829	SLC10A4;ACLY;LGALS1;YWHAQ;PRDX1;KIF5B;GPC2;MMP9
ventromedial preoptic nucleus	8/301	0.761566	0.999996	0	0	0.814412	0.221829	GAL;TRIM28;PEG10;RGS16;NNAT;UBA1;TIMP1;SCG2
Field CA3, stratum radiatum	9/342	0.780307	0.999996	0	0	0.805727	0.199875	RPS7;FOXG1;STC2;RPL22;LAPTM5;ISLR2;UNC5C;PFN1;VAMP2
Field CA1, stratum oriens	9/343	0.783133	0.999996	0	0	0.803273	0.196362	TMEFF1;ACTR2;PARP1;FOXG1;SPRY4;PLXNA1;TCF4;PFN1;DUSP6
Field CA1	9/344	0.785932	0.999996	0	0	0.800833	0.192908	PARP1;YWHAB;FOXG1;PLXNA1;CRMP1;TCF4;SLIT3;PFN1;DUSP6
Field CA2	11/425	0.814278	0.999996	0	0	0.791211	0.162557	MMP14;PARP1;FOXG1;STC2;ITGB2;PLXNA1;ISLR2;MYH9;TCF4;PFN1;VAMP2
Nucleus incertus	10/398	0.832797	0.999996	0	0	0.767329	0.140395	RGS5;SYT4;KIF26A;IGFBP2;HNRNPA2B1;SNCG;HYOU1;PLIN2;YBX1;VAT1L
Olivary pretectal nucleus	13/514	0.852775	0.999996	0	0	0.771567	0.122879	CHRNA3;IGFBP3;SPRY4;ISLR2;PROX1;PRRC2A;RSL1D1;RPL18A;PKIA;STC2;RPL27;VIM;XPR1
AOB, glomerular layer	7/301	0.858633	0.999996	0	0	0.70904	0.108067	IL1RN;RAB31;KIF26A;IL1B;DCX;SOX4;SMARCA4
AOB, internal plexiform layer	7/301	0.858633	0.999996	0	0	0.70904	0.108067	IL1RN;RAB31;KIF26A;IL1B;DCX;SOX4;SMARCA4
Agranular insular area, dorsal part	7/301	0.858633	0.999996	0	0	0.70904	0.108067	TMEFF1;ACTR2;TYROBP;GNG2;CNOT1;HNRNPF;ACTN4
Agranular insular area, dorsal part, layer 2/3	7/301	0.858633	0.999996	0	0	0.70904	0.108067	ACTR2;CNOT1;SH3BGRL3;HDGF;ACTN4;PTN;FOXM1
Ansiform lobule	7/301	0.858633	0.999996	0	0	0.70904	0.108067	CADM3;BTG1;PTPRZ1;STMN2;ATN1;VIM;ZFP36L1
Anterior amygdalar area	7/301	0.858633	0.999996	0	0	0.70904	0.108067	MARCKSL1;RPS19;IL1B;NR2F1;GATA3;ILF2;AP2M1
Anterior cingulate area, ventral part, layer 1	7/301	0.858633	0.999996	0	0	0.70904	0.108067	SQLE;SHC1;S100A6;SLC3A2;KIF21B;DUSP6;NEUROG2
Anteromedial visual area, layer 1	7/301	0.858633	0.999996	0	0	0.70904	0.108067	CDKN1A;TRIM28;ENC1;TAGLN2;EMILIN1;DUSP6;SMARCA4
Bed nuclei of the stria terminalis, anterior division, juxtacapsular nucleus	7/301	0.858633	0.999996	0	0	0.70904	0.108067	RGS4;TTYH1;PEG10;ACTN1;CRABP1;CDC42EP3;ZMPSTE24
Bed nuclei of the stria terminalis, posterior division, strial extension	7/301	0.858633	0.999996	0	0	0.70904	0.108067	CD63;TTR;CRABP1;CDC42EP3;VIM;MKI67;SOX4
Bed nucleus of the accessory olfactory tract	7/301	0.858633	0.999996	0	0	0.70904	0.108067	MARCKSL1;RPL21;LRBA;TRIB3;HDGF;GATA3;PRDX6
Cerebellar cortex	7/301	0.858633	0.999996	0	0	0.70904	0.108067	CADM3;BTG1;PTPRZ1;ATN1;VIM;SNRNP200;ZFP36L1
Cerebellar nuclei	7/301	0.858633	0.999996	0	0	0.70904	0.108067	BTG1;TTR;SHMT2;ITGB2;SPRY4;S100A4;PBX1
Cerebellum	7/301	0.858633	0.999996	0	0	0.70904	0.108067	CADM3;BTG1;PTPRZ1;ATN1;VIM;SNRNP200;ZFP36L1
Cerebral nuclei	7/301	0.858633	0.999996	0	0	0.70904	0.108067	CAP1;ALCAM;TTYH1;ACTN1;CDC42EP3;ID4;GATA3
Cortical amygdalar area, posterior part	7/301	0.858633	0.999996	0	0	0.70904	0.108067	MARCKSL1;TRIM28;CNOT1;PKIA;NR2F1;CDH13;AP2M1
Crus 1	7/301	0.858633	0.999996	0	0	0.70904	0.108067	BTG1;PTPRZ1;STMN2;ATN1;VIM;SNRNP200;ZFP36L1
Crus 1, molecular layer	7/301	0.858633	0.999996	0	0	0.70904	0.108067	BTG1;PTPRZ1;STMN2;ATN1;VIM;SNRNP200;ZFP36L1
Crus 2, molecular layer	7/301	0.858633	0.999996	0	0	0.70904	0.108067	CADM3;BTG1;PTPRZ1;ZMIZ1;STMN2;ATN1;ZFP36L1
Declive (VI)	7/301	0.858633	0.999996	0	0	0.70904	0.108067	CADM3;BTG1;PTPRZ1;VIM;PBX1;SEPT2;TBX3
Declive (VI), granular layer	7/301	0.858633	0.999996	0	0	0.70904	0.108067	CADM3;BTG1;PTPRZ1;VIM;PBX1;SEPT2;TBX3
Declive (VI), molecular layer	7/301	0.858633	0.999996	0	0	0.70904	0.108067	CADM3;BTG1;PTPRZ1;VIM;SNRNP200;SEPT2;TBX3
Dorsal column nuclei	7/301	0.858633	0.999996	0	0	0.70904	0.108067	IGFBP3;S100A6;PLIN2;MVD;YWHAZ;TBX3;PHOX2A
Dorsal peduncular area, layer 1	7/301	0.858633	0.999996	0	0	0.70904	0.108067	FCER1G;GDF15;S100A4;HLA-A;HSPG2;NEUROG2;DDR2
Entorhinal area, medial part, dorsal zone, layer 5	7/301	0.858633	0.999996	0	0	0.70904	0.108067	TMEFF1;LARP1;CDH2;CPE;TCF4;ILF2;PRPH
Epithalamus	7/301	0.858633	0.999996	0	0	0.70904	0.108067	CD63;FADS2;CHRNA3;SCRN1;ITGB2;PROX1;XPR1
Field CA1, stratum pyramidale	7/301	0.858633	0.999996	0	0	0.70904	0.108067	YWHAB;FOXG1;TRIM2;PLXNA1;TCF4;PFN1;DUSP6
Field CA2, pyramidal layer	7/301	0.858633	0.999996	0	0	0.70904	0.108067	MMP14;FOXG1;STC2;ITGB2;PLXNA1;TCF4;PFN1
Fields of Forel	7/301	0.858633	0.999996	0	0	0.70904	0.108067	RET;YWHAQ;PLXNA1;RPL35A;UNC5C;LSS;DLK1
Flocculus, granular layer	7/301	0.858633	0.999996	0	0	0.70904	0.108067	BTG1;ITGB2;STMN2;ATN1;TBX3;CHGB;ZFP36L1
Globus pallidus, internal segment	7/301	0.858633	0.999996	0	0	0.70904	0.108067	SLC10A4;RAB31;YWHAQ;UNC5B;CCL20;PABPC4;GATA3
Gracile nucleus	7/301	0.858633	0.999996	0	0	0.70904	0.108067	RGS5;GAL;IGFBP3;PLIN2;MVD;SLC7A1;LSS
Hippocampal formation	7/301	0.858633	0.999996	0	0	0.70904	0.108067	FOXG1;RPL22;ISLR2;TCF4;SLIT3;PROX1;PFN1
Infralimbic area, layer 2/3	7/301	0.858633	0.999996	0	0	0.70904	0.108067	FCER1G;SHMT2;CRABP1;S100A6;SOX11;NEUROG2;DDR2
Intergeniculate leaflet of the lateral geniculate complex	7/301	0.858633	0.999996	0	0	0.70904	0.108067	YWHAQ;RGS16;UNC5C;GATA3;L1CAM;BAZ1B;LSS
Lateral posterior nucleus of the thalamus	7/301	0.858633	0.999996	0	0	0.70904	0.108067	NGRN;RGS16;WAC;STMN4;UNC5C;PROX1;EIF3A
Lateral reticular nucleus	7/301	0.858633	0.999996	0	0	0.70904	0.108067	TOP2A;SYT4;TRIM28;NRG4;TARS;S100A4;EIF4B
Lateral septal complex	7/301	0.858633	0.999996	0	0	0.70904	0.108067	SOX2;SYT4;PNOC;ID4;PTN;SOX4;XPR1
Lateral septal nucleus	7/301	0.858633	0.999996	0	0	0.70904	0.108067	SOX2;SYT4;ALCAM;PNOC;ID4;SOX4;XPR1
Lateral septal nucleus, rostral (rostroventral) part	7/301	0.858633	0.999996	0	0	0.70904	0.108067	SOX2;SYT4;ALCAM;PEG10;PNOC;SOX4;XPR1
Lobules IV-V, granular layer	7/301	0.858633	0.999996	0	0	0.70904	0.108067	CADM3;BTG1;PTPRZ1;ATN1;VIM;SNRNP200;TBX3
Main olfactory bulb	7/301	0.858633	0.999996	0	0	0.70904	0.108067	IL1RN;CDKN1A;IL1B;FABP7;DCX;PLIN2;SOX4
Main olfactory bulb, glomerular layer	7/301	0.858633	0.999996	0	0	0.70904	0.108067	IL1RN;FCER1G;IL1B;FABP7;DCX;PLIN2;SOX4
Main olfactory bulb, inner plexiform layer	7/301	0.858633	0.999996	0	0	0.70904	0.108067	IL1RN;CDKN1A;IL1B;FABP7;DCX;SOX4;VAMP2
Main olfactory bulb, mitral layer	7/301	0.858633	0.999996	0	0	0.70904	0.108067	IL1RN;CDKN1A;IL1B;FABP7;DCX;SOX4;VAMP2
Main olfactory bulb, outer plexiform layer	7/301	0.858633	0.999996	0	0	0.70904	0.108067	IL1RN;CDKN1A;IL1B;FABP7;DCX;PLIN2;SOX4
Medial amygdalar nucleus, posteroventral part	7/301	0.858633	0.999996	0	0	0.70904	0.108067	MARCKSL1;STC2;IL1B;PEA15;LAPTM5;HDGF;FOXM1
Medial geniculate complex, dorsal part	7/301	0.858633	0.999996	0	0	0.70904	0.108067	RPL18A;SHC1;RGS16;GATA3;PROX1;FGFBP3;BAZ1B
Medial geniculate complex, ventral part	7/301	0.858633	0.999996	0	0	0.70904	0.108067	RPL18A;PKIA;RGS16;RPL11;IGF2;GATA3;FGFBP3
Medial septal complex	7/301	0.858633	0.999996	0	0	0.70904	0.108067	SLC10A4;SYT4;ALCAM;GAL;PEG10;PABPC4;UBA1
Nodulus (X), molecular layer	7/301	0.858633	0.999996	0	0	0.70904	0.108067	RGS5;TTR;AHNAK;IGFBP3;ITGB2;VIM;HIST1H1C
Nucleus ambiguus	7/301	0.858633	0.999996	0	0	0.70904	0.108067	TOP2A;NRG4;STC2;HLA-A;LSS;EIF4B;ZMPSTE24
Nucleus ambiguus, ventral division	7/301	0.858633	0.999996	0	0	0.70904	0.108067	TRIM28;NRG4;STC2;HLA-A;LSS;EIF4B;ZMPSTE24
Nucleus of the brachium of the inferior colliculus	7/301	0.858633	0.999996	0	0	0.70904	0.108067	GRN;SPARC;CCL20;EIF3L;PKIA;IGF2;GATA3
OB glomerular layer	7/301	0.858633	0.999996	0	0	0.70904	0.108067	IL1RN;FCER1G;IL1B;FABP7;DCX;PLIN2;SOX4
OB outer plexiform layer	7/301	0.858633	0.999996	0	0	0.70904	0.108067	IL1RN;CDKN1A;IL1B;FABP7;DCX;PLIN2;SOX4
Orbital area, medial part, layer 2	7/301	0.858633	0.999996	0	0	0.70904	0.108067	IL1RN;FCER1G;GDF15;CRABP1;S100A6;NEUROG2;DDR2
Pallidum, dorsal region	7/301	0.858633	0.999996	0	0	0.70904	0.108067	RAB31;UNC5B;CCL20;CRABP1;GATA3;LSS;PBX1
Parabrachial nucleus, lateral division, superior lateral part	7/301	0.858633	0.999996	0	0	0.70904	0.108067	SLC10A4;SPARC;RPS18;RPS20;NCAM1;GATA3;CCT7
Paramedian lobule	7/301	0.858633	0.999996	0	0	0.70904	0.108067	CADM3;BTG1;PTPRZ1;ZMIZ1;ATN1;VIM;ZFP36L1
Paramedian lobule, granular layer	7/301	0.858633	0.999996	0	0	0.70904	0.108067	CADM3;BTG1;PTPRZ1;ATN1;MYH9;VIM;ZFP36L1
Piriform area, polymorph layer	7/301	0.858633	0.999996	0	0	0.70904	0.108067	ACTR2;TYROBP;ARHGEF2;PTN;HMGCR;TBX3;PRPH
Piriform-amygdalar area	7/301	0.858633	0.999996	0	0	0.70904	0.108067	MARCKSL1;TYROBP;TRIM28;CNOT1;STC2;PKIA;PLIN2
Pontine central gray	7/301	0.858633	0.999996	0	0	0.70904	0.108067	SLC10A4;RGS5;SYT4;KIF26A;IGFBP2;SNCG;PHOX2A
Posterolateral visual area	7/301	0.858633	0.999996	0	0	0.70904	0.108067	LASP1;LARP1;PLAUR;INSM2;HMGCR;DUSP6;PRPH
Postsubiculum, layer 3	7/301	0.858633	0.999996	0	0	0.70904	0.108067	CAP1;CDKN1A;STC2;NR2F1;HDGF;TCF4;GATA3
Prelimbic area, layer 1	7/301	0.858633	0.999996	0	0	0.70904	0.108067	SQLE;IL1RN;DCX;SLC3A2;NEUROG2;ATP9A;SMARCA4
Prelimbic area, layer 2/3	7/301	0.858633	0.999996	0	0	0.70904	0.108067	SYT4;IL1RN;CRABP1;S100A6;NEUROG2;ATP9A;SMARCA4
Pretectal region	7/301	0.858633	0.999996	0	0	0.70904	0.108067	RSL1D1;NGRN;CHRNA3;RGS16;LAPTM5;GATA3;PROX1
Primary motor area, Layer 5	7/301	0.858633	0.999996	0	0	0.70904	0.108067	TMEFF1;ACAP3;NGRN;SH3BGRL3;INSM2;PTN;HMGCR
Primary somatosensory area, barrel field, layer 4	7/301	0.858633	0.999996	0	0	0.70904	0.108067	RGS4;LASP1;LRP1;TNRC18;INSM2;PTN;B2M
Primary somatosensory area, barrel field, layer 6a	7/301	0.858633	0.999996	0	0	0.70904	0.108067	LASP1;LARP1;LRP1;KIF5C;PPT1;PLAUR;MVD
Primary somatosensory area, lower limb, layer 2/3	7/301	0.858633	0.999996	0	0	0.70904	0.108067	TRIM28;FOXG1;ENC1;ENPP2;EIF4EBP1;RPL27;HMGCR
Primary somatosensory area, mouth, layer 6b	7/301	0.858633	0.999996	0	0	0.70904	0.108067	TMEFF1;ACAP3;KIF5C;FASN;HDLBP;ACTN4;ARHGEF2
Primary somatosensory area, trunk	7/301	0.858633	0.999996	0	0	0.70904	0.108067	RGS4;WDR82;ENC1;TNRC18;INSM2;HMGCR;DUSP6
Primary visual area	7/301	0.858633	0.999996	0	0	0.70904	0.108067	CDKN1A;CCL20;TNRC18;INSM2;PTN;HMGCR;DUSP6
Primary visual area, layer 1	7/301	0.858633	0.999996	0	0	0.70904	0.108067	CDK6;TRIM28;ENC1;EIF4EBP1;TNRC18;DUSP6;MCL1
Retrosplenial area, lateral agranular part, layer 1	7/301	0.858633	0.999996	0	0	0.70904	0.108067	CDKN1A;TRIM28;PABPC4;ENC1;SF3B1;DUSP6;SMARCA4
Retrosplenial area, lateral agranular part, layer 2/3	7/301	0.858633	0.999996	0	0	0.70904	0.108067	CDKN1A;TRIM28;TNRC18;SLC1A5;SF3B1;DUSP6;SMARCA4
Simple lobule, molecular layer	7/301	0.858633	0.999996	0	0	0.70904	0.108067	RBM39;CADM3;BTG1;PTPRZ1;ATN1;VIM;ZFP36L1
Striatum	7/301	0.858633	0.999996	0	0	0.70904	0.108067	CAP1;ALCAM;TTYH1;ACTN1;CDC42EP3;ID4;GATA3
Submedial nucleus of the thalamus	7/301	0.858633	0.999996	0	0	0.70904	0.108067	RAB3C;RIMS3;SHC1;RGS16;PROX1;L1CAM;AGRN
Superior colliculus, optic layer	7/301	0.858633	0.999996	0	0	0.70904	0.108067	CHRNA3;GDF15;S100A6;CTNNB1;RPL27;SMC4;SMARCA4
Superior colliculus, sensory related	7/301	0.858633	0.999996	0	0	0.70904	0.108067	MMP14;GDF15;S100A6;RPL27;UBA1;SMC4;SMARCA4
Superior colliculus, zonal layer	7/301	0.858633	0.999996	0	0	0.70904	0.108067	MMP14;AHNAK;GDF15;S100A6;UBA1;SMC4;SMARCA4
Superior olivary complex, lateral part	7/301	0.858633	0.999996	0	0	0.70904	0.108067	SLC10A4;LGALS1;GPC2;RPL37;HLA-A;LCP1;MMP9
Taenia tecta, dorsal part	7/301	0.858633	0.999996	0	0	0.70904	0.108067	TMEFF1;FCER1G;GDF15;CRABP1;S100A4;NEUROG2;DDR2
Taenia tecta, dorsal part, layer 3	7/301	0.858633	0.999996	0	0	0.70904	0.108067	TOP2A;SURF4;CNTN1;FLNA;CDH13;PTN;VAMP2
Ventral group of the dorsal thalamus	7/301	0.858633	0.999996	0	0	0.70904	0.108067	RIMS3;IL1B;RGS16;NR2F1;MYO5A;PROX1;L1CAM
Ventral posteromedial nucleus of the thalamus	7/301	0.858633	0.999996	0	0	0.70904	0.108067	RGS16;NR2F1;MYO5A;STMN4;UNC5C;L1CAM;CLASP2
Visceral area	7/301	0.858633	0.999996	0	0	0.70904	0.108067	LASP1;LARP1;PPT1;PLAUR;TBX3;IER3;FDFT1
Visceral area, layer 6a	7/301	0.858633	0.999996	0	0	0.70904	0.108067	LARP1;GNG2;PPT1;PLAUR;TBX3;IER3;FDFT1
amygdalo-striatal transition	7/301	0.858633	0.999996	0	0	0.70904	0.108067	RPL21;KIF26A;ITGB2;ID4;ILF2;LSS;XPR1
amygdalohippocampal area	7/301	0.858633	0.999996	0	0	0.70904	0.108067	MARCKSL1;PEA15;NR2F1;TARS;CDH13;HDGF;ILF2
anteroventral part of alar thalamus	7/301	0.858633	0.999996	0	0	0.70904	0.108067	RAB3C;RIMS3;SHC1;RGS16;UNC5C;L1CAM;LSS
central amygdaloid nucleus, medial part	7/301	0.858633	0.999996	0	0	0.70904	0.108067	SLC10A4;RPL21;PABPC4;MSN;PLIN2;LSS;PRPH
cingulate cortex	7/301	0.858633	0.999996	0	0	0.70904	0.108067	TMEFF1;MYO5A;SLC3A2;HMGCR;SLC7A1;DUSP6;SEPT3
colliculus superior	7/301	0.858633	0.999996	0	0	0.70904	0.108067	CHRNA3;GDF15;S100A6;RPL27;SMC4;NEUROG2;SMARCA4
cortex of cerebellar hemisphere	7/301	0.858633	0.999996	0	0	0.70904	0.108067	CADM3;BTG1;PTPRZ1;ZMIZ1;ATN1;VIM;ZFP36L1
dorsal pallium/isocortex	7/301	0.858633	0.999996	0	0	0.70904	0.108067	ACAP3;ENC1;TNRC18;INSM2;PTN;HMGCR;DUSP6
dorsal terminal nucleus of the accessory optic tract	7/301	0.858633	0.999996	0	0	0.70904	0.108067	GANAB;RPL18A;PKIA;SPRY4;ISLR2;SLIT3;PROX1
dorsolateral SC part of the periaqueductal gray	7/301	0.858633	0.999996	0	0	0.70904	0.108067	UNC5B;RPS8;STXBP1;HMGA1;PLXNA1;SNCG;DDR2
dorsolateral TG part of the periaqueductal gray	7/301	0.858633	0.999996	0	0	0.70904	0.108067	TRIM28;UNC5B;RPS8;STXBP1;HNRNPA2B1;SNCG;AGRN
dorsomedial preoptic area, superficial part	7/301	0.858633	0.999996	0	0	0.70904	0.108067	FCER1G;GAL;NRG4;PEG10;S100A4;UBA1;PBX1
external part of AOD	7/301	0.858633	0.999996	0	0	0.70904	0.108067	IL1RN;RAB31;GDF15;KIF26A;DCX;SOX4;SMARCA4
intergeniculate leaflet	7/301	0.858633	0.999996	0	0	0.70904	0.108067	RPL18A;YWHAQ;RGS16;UNC5C;MVD;BAZ1B;LSS
intermediate gray layer of SC	7/301	0.858633	0.999996	0	0	0.70904	0.108067	CHRNA3;S100A6;CTNNB1;RPL27;SMC4;NEUROG2;SMARCA4
intermediate mantle of isBM	7/301	0.858633	0.999996	0	0	0.70904	0.108067	SLC10A4;SDC2;PNOC;CEBPG;CNTN1;YWHAZ;FDFT1
intermediate part of r10B	7/301	0.858633	0.999996	0	0	0.70904	0.108067	SLC10A4;TOP2A;YARS;LGALS1;HMGA1;MSN;YWHAZ
intermediate part of r1B	7/301	0.858633	0.999996	0	0	0.70904	0.108067	SLC10A4;YARS;RPL12;PLXNA1;SNCG;LSS;PHOX2A
intermediate stratum of APal	7/301	0.858633	0.999996	0	0	0.70904	0.108067	SLC10A4;RPL21;PABPC4;MSN;PLIN2;LSS;PRPH
intermediate stratum of DTTh	7/301	0.858633	0.999996	0	0	0.70904	0.108067	RIMS3;SHC1;RGS16;ID4;CTNNB1;PROX1;L1CAM
intermediate stratum of LAP	7/301	0.858633	0.999996	0	0	0.70904	0.108067	DNAJA1;LARP1;CNOT1;NR2F1;PLAUR;ILF2;AP2M1
intermediate stratum of RtC	7/301	0.858633	0.999996	0	0	0.70904	0.108067	RAB31;TTR;UNC5B;RGS16;PNOC;NR2F1;ID4
intermediate stratum of Str	7/301	0.858633	0.999996	0	0	0.70904	0.108067	CAP1;RGS4;SCRN1;ACTN1;CDC42EP3;ID4;HIST1H1C
intermediate stratum of TSPaA	7/301	0.858633	0.999996	0	0	0.70904	0.108067	GAL;PEG10;USP11;HNRNPD;TARS;PRRC2B;GNAI2
intermediate stratum of m1AD	7/301	0.858633	0.999996	0	0	0.70904	0.108067	FADS2;CCND1;RPL27A;PKIA;RPL37A;DDX21;SNCG
intermediate stratum of p1B	7/301	0.858633	0.999996	0	0	0.70904	0.108067	SLC10A4;RET;UNC5B;SDC2;SNCG;EBF3;LSS
intermediate stratum of r10BI	7/301	0.858633	0.999996	0	0	0.70904	0.108067	TOP2A;YARS;LGALS1;HMGA1;S100A4;MKI67;YWHAZ
intermediate stratum of r1BI	7/301	0.858633	0.999996	0	0	0.70904	0.108067	SLC10A4;YARS;RPL12;PLXNA1;SNCG;LSS;PHOX2A
intermediate stratum of r1Lim	7/301	0.858633	0.999996	0	0	0.70904	0.108067	SLC10A4;LGALS1;RPS18;RPS20;RPL37;LCP1;MMP9
intermediate stratum of r2BM	7/301	0.858633	0.999996	0	0	0.70904	0.108067	SLC10A4;YARS;SLC7A5;KIF5B;SPP1;HMGA1;AP2M1
intermediate stratum of r5Lim	7/301	0.858633	0.999996	0	0	0.70904	0.108067	SLC10A4;YARS;LGALS1;KIF5B;SPP1;GPC2;MMP9
intermediate stratum of r7Lim	7/301	0.858633	0.999996	0	0	0.70904	0.108067	ACLY;SYT4;NRG4;TAGLN2;HLA-A;LSS;EIF4B
internal granular layer of CbVCx	7/301	0.858633	0.999996	0	0	0.70904	0.108067	CADM3;BTG1;PTPRZ1;ATN1;VIM;SNRNP200;TBX3
interstitial nucleus of the posterior limb of the anterior commissure	7/301	0.858633	0.999996	0	0	0.70904	0.108067	RPL21;PEG10;IL1B;CDC42EP3;ILF2;ACTG1;PRPH
lateral SC part of the periaqueductal gray	7/301	0.858633	0.999996	0	0	0.70904	0.108067	UNC5B;RPS8;TTC3;HMGA1;SNCG;EBF3;AP2M1
lateral pallium	7/301	0.858633	0.999996	0	0	0.70904	0.108067	IL1RN;TYROBP;KIF26A;CRABP1;PLAUR;DCX;DDR2
lateral parabrachial nucleus	7/301	0.858633	0.999996	0	0	0.70904	0.108067	VAT1;SYT4;SPARC;PRDX1;RPS20;NCAM1;ADNP
lateral part of PcP	7/301	0.858633	0.999996	0	0	0.70904	0.108067	RSL1D1;NGRN;RIMS3;SHC1;RGS16;LAPTM5;PROX1
lateral part of r6B	7/301	0.858633	0.999996	0	0	0.70904	0.108067	LGALS1;NRG4;RPL12;GPC2;MSN;HLA-A;PHOX2A
lateral superior olive	7/301	0.858633	0.999996	0	0	0.70904	0.108067	SLC10A4;LGALS1;NRG4;LAPTM5;GPC2;HLA-A;LCP1
lateral wings of the dorsal raphe nucleus	7/301	0.858633	0.999996	0	0	0.70904	0.108067	SLC10A4;RPL12;PNOC;EBF3;NCAM1;YWHAZ;PHOX2A
layer 2 of AOD cortex	7/301	0.858633	0.999996	0	0	0.70904	0.108067	IL1RN;GDF15;KIF26A;DCX;SOX11;FOXM1;SOX4
layer 2 of OCx	7/301	0.858633	0.999996	0	0	0.70904	0.108067	RGS4;CDKN1A;ENC1;TNRC18;INSM2;DUSP6;SMARCA4
layer 2 of PRh-Ect	7/301	0.858633	0.999996	0	0	0.70904	0.108067	EML4;RBM39;PLAUR;INSM2;HMGCR;RPS27A;FDFT1
layer 4 of FCx	7/301	0.858633	0.999996	0	0	0.70904	0.108067	ACAP3;TYROBP;TRIM2;ENPP2;SH3BGRL3;INSM2;PTN
layer 4 of PRh-Ect	7/301	0.858633	0.999996	0	0	0.70904	0.108067	DNAJA1;RBM39;MYL6;SSR2;PLAUR;STMN4;HMGCR
liminal part of the r5 alar plate	7/301	0.858633	0.999996	0	0	0.70904	0.108067	SLC10A4;LGALS1;PRDX1;KIF5B;SPP1;GPC2;MMP9
liminal part of the r7 alar plate	7/301	0.858633	0.999996	0	0	0.70904	0.108067	ACLY;SYT4;NRG4;TAGLN2;HLA-A;LSS;EIF4B
magnocellular interstitial nucleus of the posterior commissure	7/301	0.858633	0.999996	0	0	0.70904	0.108067	UNC5B;DPYSL2;PNOC;ATP5G3;AGRN;PRDX6;PFDN5
mantle zone of AOB	7/301	0.858633	0.999996	0	0	0.70904	0.108067	IL1RN;RAB31;KIF26A;IL1B;DCX;SOX4;SMARCA4
mantle zone of CCx	7/301	0.858633	0.999996	0	0	0.70904	0.108067	TMEFF1;MYO5A;SLC3A2;HMGCR;SLC7A1;DUSP6;SEPT3
mantle zone of OCx	7/301	0.858633	0.999996	0	0	0.70904	0.108067	RGS4;CDKN1A;TNRC18;INSM2;HMGCR;DUSP6;SMARCA4
mantle zone of PcPL	7/301	0.858633	0.999996	0	0	0.70904	0.108067	RSL1D1;NGRN;RIMS3;SHC1;RGS16;LAPTM5;PROX1
mantle zone of SC	7/301	0.858633	0.999996	0	0	0.70904	0.108067	CHRNA3;GDF15;S100A6;RPL27;SMC4;NEUROG2;SMARCA4
mantle zone of Str	7/301	0.858633	0.999996	0	0	0.70904	0.108067	CAP1;RGS4;SCRN1;ACTN1;CDC42EP3;ID4;HIST1H1C
mantle zone of r10BI	7/301	0.858633	0.999996	0	0	0.70904	0.108067	SLC10A4;TOP2A;YARS;LGALS1;HMGA1;MSN;YWHAZ
mantle zone of r1BI	7/301	0.858633	0.999996	0	0	0.70904	0.108067	SLC10A4;YARS;RPL12;PLXNA1;SNCG;LSS;PHOX2A
mantle zone of r1BM	7/301	0.858633	0.999996	0	0	0.70904	0.108067	SLC10A4;RGS5;DPYSL5;KIF26A;SDC2;IGF2;MVD
mantle zone of r3BM	7/301	0.858633	0.999996	0	0	0.70904	0.108067	SLC7A5;GRN;MAB21L2;SPP1;HMGA1;NEFL;TARS
mantle zone of r5Lim	7/301	0.858633	0.999996	0	0	0.70904	0.108067	SLC10A4;LGALS1;PRDX1;KIF5B;SPP1;GPC2;MMP9
mantle zone of r6BL	7/301	0.858633	0.999996	0	0	0.70904	0.108067	LGALS1;NRG4;RPL12;GPC2;MSN;HLA-A;PHOX2A
mantle zone of r7Lim	7/301	0.858633	0.999996	0	0	0.70904	0.108067	ACLY;SYT4;NRG4;TAGLN2;HLA-A;LSS;EIF4B
medial part of r1B	7/301	0.858633	0.999996	0	0	0.70904	0.108067	SLC10A4;RGS5;DPYSL5;KIF26A;SDC2;IGF2;MVD
medial part of r3B	7/301	0.858633	0.999996	0	0	0.70904	0.108067	SLC7A5;GRN;MAB21L2;SPP1;HMGA1;NEFL;TARS
medial subhabenular nucleus	7/301	0.858633	0.999996	0	0	0.70904	0.108067	CD63;FADS2;CHRNA3;SCRN1;DPYSL5;ITGB2;ID4
medial superior olive	7/301	0.858633	0.999996	0	0	0.70904	0.108067	LGALS1;NRG4;PABPC4;IL1B;RPL12;RPS13;PHOX2A
molecular layer of CbHCx	7/301	0.858633	0.999996	0	0	0.70904	0.108067	CADM3;BTG1;PTPRZ1;ATN1;VIM;SNRNP200;ZFP36L1
molecular layer of the DG	7/301	0.858633	0.999996	0	0	0.70904	0.108067	NCOR2;PKIA;RPL22;ISLR2;PROX1;PFN1;XPR1
nucleus of the central acoustic tract	7/301	0.858633	0.999996	0	0	0.70904	0.108067	EML4;SLC10A4;LGALS1;PRDX1;KIF5B;GPC2;MMP9
nucleus of the inferior collicular brachium, rostral part	7/301	0.858633	0.999996	0	0	0.70904	0.108067	GRN;SPARC;SHMT2;PKIA;RPL12;VIM;P4HB
nucleus subcoeruleus, r1 part	7/301	0.858633	0.999996	0	0	0.70904	0.108067	SLC10A4;TMEFF1;ACLY;PRKDC;SNCG;FDFT1;PHOX2A
occipital cortex	7/301	0.858633	0.999996	0	0	0.70904	0.108067	RGS4;CDKN1A;TNRC18;INSM2;HMGCR;DUSP6;SMARCA4
p1 part of the pararubral nucleus	7/301	0.858633	0.999996	0	0	0.70904	0.108067	SLC10A4;RET;YARS;UNC5B;SPP1;SNCG;LSS
p1Lim part of periaqueductal gray	7/301	0.858633	0.999996	0	0	0.70904	0.108067	YARS;UNC5B;PNOC;ATP5G3;AGRN;PGM2L1;VAMP2
p3 part of the ZL core	7/301	0.858633	0.999996	0	0	0.70904	0.108067	RAB3C;RAB31;SDC2;RGS16;NR2F1;MYO5A;L1CAM
parabrachial part of the periaqueductal gray	7/301	0.858633	0.999996	0	0	0.70904	0.108067	FADS2;RPS18;PKIA;NNAT;SNCG;EBF3;GNAI2
pararubral nucleus, m1 part	7/301	0.858633	0.999996	0	0	0.70904	0.108067	SLC10A4;RET;APC2;IL1B;SPP1;SNCG;AP2M1
periventricular stratum of AStr	7/301	0.858633	0.999996	0	0	0.70904	0.108067	RPL21;KIF26A;ITGB2;ID4;ILF2;LSS;XPR1
periventricular stratum of TG	7/301	0.858633	0.999996	0	0	0.70904	0.108067	TRIM28;UNC5B;RPS8;STXBP1;HNRNPA2B1;SNCG;AGRN
periventricular stratum of p1Lim	7/301	0.858633	0.999996	0	0	0.70904	0.108067	YARS;UNC5B;PNOC;ATP5G3;AGRN;PGM2L1;VAMP2
periventricular stratum of r10BM	7/301	0.858633	0.999996	0	0	0.70904	0.108067	SLC10A4;TOP2A;DNAJA1;ACLY;LGALS1;MAB21L2;MSN
periventricular stratum of r1BM	7/301	0.858633	0.999996	0	0	0.70904	0.108067	SOX2;SLC10A4;RGS5;KIF26A;RPL37A;MVD;FDFT1
periventricular stratum of r6BM	7/301	0.858633	0.999996	0	0	0.70904	0.108067	RGS5;SYT4;TTR;IGFBP3;MAB21L2;SNCG;PBX1
periventricular stratum of r7BM	7/301	0.858633	0.999996	0	0	0.70904	0.108067	ACLY;ITGB2;MAB21L2;SNCG;TIMP1;FAU;PBX1
periventricular stratum of r9BM	7/301	0.858633	0.999996	0	0	0.70904	0.108067	TOP2A;ACLY;LGALS1;GDF15;RPL12;MAB21L2;MSN
periventricular stratum of the PBC	7/301	0.858633	0.999996	0	0	0.70904	0.108067	FADS2;RPS18;PKIA;NNAT;SNCG;EBF3;GNAI2
posterior triangular nucleus	7/301	0.858633	0.999996	0	0	0.70904	0.108067	YWHAE;RIMS3;YWHAQ;SHC1;RGS16;STMN4;ARHGEF2
posterodorsal tegmental nucleus	7/301	0.858633	0.999996	0	0	0.70904	0.108067	RGS5;SYT4;TTR;KIF26A;HNRNPA2B1;IGFBP2;YBX1
posterolateral cortical amygdaloid area	7/301	0.858633	0.999996	0	0	0.70904	0.108067	MARCKSL1;TRIM28;RPS7;CNOT1;PKIA;PLIN2;PRPH
posteromedial visual area, layer 1	7/301	0.858633	0.999996	0	0	0.70904	0.108067	NGRN;TRIM28;TAGLN2;TNRC18;S100A4;SF3B1;DUSP6
principal pretectal nucleus	7/301	0.858633	0.999996	0	0	0.70904	0.108067	PKIA;SPRY4;ISLR2;RPL27;PROX1;PGM2L1;PRRC2A
prosomere 3	7/301	0.858633	0.999996	0	0	0.70904	0.108067	RET;RAB31;TTR;RGS16;NR2F1;IGF2;TMBIM6
putamen	7/301	0.858633	0.999996	0	0	0.70904	0.108067	CAP1;RGS4;SCRN1;ACTN1;CDC42EP3;ID4;HIST1H1C
r1 part of basointermediate reticular formation	7/301	0.858633	0.999996	0	0	0.70904	0.108067	SLC10A4;YARS;RPL12;PLXNA1;SNCG;LSS;PHOX2A
r1 part of ventral parvicellular reticular formation	7/301	0.858633	0.999996	0	0	0.70904	0.108067	SLC10A4;LGALS1;RPS18;RPS20;RPL37;LCP1;MMP9
r10 alar plate	7/301	0.858633	0.999996	0	0	0.70904	0.108067	SLC10A4;LGALS1;GAL;MSN;TAGLN2;PLIN2;YWHAZ
r10 part of basointermediate reticular formation	7/301	0.858633	0.999996	0	0	0.70904	0.108067	TOP2A;YARS;SLC38A1;HMGA1;S100A4;MKI67;YWHAZ
r2 liminal central gray	7/301	0.858633	0.999996	0	0	0.70904	0.108067	SLC10A4;FADS2;GAL;SURF4;IGFBP2;PLIN2;PHOX2A
r2 part of lateral pontine nuclei	7/301	0.858633	0.999996	0	0	0.70904	0.108067	AHNAK;NRG4;SPP1;TARS;HLA-A;HSPG2;RPS13
r3 part of lateral pontine nuclei	7/301	0.858633	0.999996	0	0	0.70904	0.108067	AHNAK;NRG4;SPP1;TARS;TRIB3;HLA-A;RPS13
r5 part of ventral parvicellular reticular formation	7/301	0.858633	0.999996	0	0	0.70904	0.108067	SLC10A4;YARS;LGALS1;KIF5B;SPP1;GPC2;MMP9
r6 part of nucleus prepositus	7/301	0.858633	0.999996	0	0	0.70904	0.108067	RGS5;SYT4;TTR;IGFBP3;MAB21L2;SNCG;PBX1
r7 part of ventral parvicellular reticular formation	7/301	0.858633	0.999996	0	0	0.70904	0.108067	ACLY;SYT4;NRG4;TAGLN2;HLA-A;LSS;EIF4B
r7 portion of ambiguous motor nucleus	7/301	0.858633	0.999996	0	0	0.70904	0.108067	ACLY;SYT4;MSN;TAGLN2;HLA-A;LSS;EIF4B
r8 part of lateral reticular nucleus	7/301	0.858633	0.999996	0	0	0.70904	0.108067	TOP2A;TRIM28;TSC22D1;NRG4;IL1B;HLA-A;EIF4B
r9 portion of ambiguous motor nucleus (postmigratory)	7/301	0.858633	0.999996	0	0	0.70904	0.108067	TOP2A;SYT4;UNC5B;PRKDC;S100A4;YWHAZ;EIF4B
r9 portion of the hypoglossal motor nucleus	7/301	0.858633	0.999996	0	0	0.70904	0.108067	SLC10A4;ACLY;LGALS1;RPL12;MAB21L2;MSN;YWHAZ
reticular formation of CoPL	7/301	0.858633	0.999996	0	0	0.70904	0.108067	RSL1D1;RBM39;SPRY4;LAPTM5;RPL27;PROX1;YWHAG
reticular nucleus	7/301	0.858633	0.999996	0	0	0.70904	0.108067	RAB31;TTR;UNC5B;RGS16;PNOC;NR2F1;ID4
rhombomere 10	7/301	0.858633	0.999996	0	0	0.70904	0.108067	SLC10A4;TOP2A;LGALS1;GAL;MSN;TRIB3;MKI67
rostral periolivary nucleus	7/301	0.858633	0.999996	0	0	0.70904	0.108067	SLC38A1;YWHAQ;NRG4;PABPC4;TARS;HSPG2;RPS13
rostral ventrolateral reticular area	7/301	0.858633	0.999996	0	0	0.70904	0.108067	TRIM28;NRG4;GPC2;HLA-A;LSS;EIF4B;ZMPSTE24
striatal septum	7/301	0.858633	0.999996	0	0	0.70904	0.108067	SOX2;SYT4;ALCAM;PNOC;ID4;EBF3;XPR1
striatum (corpus striatum)	7/301	0.858633	0.999996	0	0	0.70904	0.108067	CAP1;RGS4;SCRN1;ACTN1;CDC42EP3;ID4;HIST1H1C
sublayer 6a of InsCx	7/301	0.858633	0.999996	0	0	0.70904	0.108067	TMEFF1;ACAP3;FASN;HDLBP;RPS20;ACTN4;IER3
sublayer 6b of FCx	7/301	0.858633	0.999996	0	0	0.70904	0.108067	TMEFF1;ACAP3;LRP1;PPP2R1A;FASN;HDLBP;MYO5A
subpallial amygdala	7/301	0.858633	0.999996	0	0	0.70904	0.108067	SOX2;TTR;RPL21;NR2F1;ILF2;XPR1;PRPH
subpallium	7/301	0.858633	0.999996	0	0	0.70904	0.108067	CAP1;RGS4;ALCAM;TTYH1;ACTN1;CDC42EP3;ID4
substantia nigra reticulata, m1 part	7/301	0.858633	0.999996	0	0	0.70904	0.108067	SLC10A4;AHNAK;NRG4;PABPC4;IGF2;MMP9;RPS13
superficial stratum of AOB	7/301	0.858633	0.999996	0	0	0.70904	0.108067	IL1RN;RAB31;KIF26A;IL1B;DCX;SOX4;SMARCA4
superficial stratum of CCx (cortical plate/marginal zone)	7/301	0.858633	0.999996	0	0	0.70904	0.108067	TMEFF1;MYO5A;SLC3A2;HMGCR;SLC7A1;DUSP6;SEPT3
superficial stratum of ITTh	7/301	0.858633	0.999996	0	0	0.70904	0.108067	RSL1D1;RPL18A;RGS16;WAC;PROX1;BAZ1B;EIF3A
superficial stratum of OCx (cortical plate/marginal zone)	7/301	0.858633	0.999996	0	0	0.70904	0.108067	RGS4;CDKN1A;TNRC18;INSM2;HMGCR;DUSP6;SMARCA4
superficial stratum of PO1	7/301	0.858633	0.999996	0	0	0.70904	0.108067	FCER1G;GAL;NRG4;PEG10;S100A4;UBA1;PBX1
superficial stratum of cerebellar hemisphere	7/301	0.858633	0.999996	0	0	0.70904	0.108067	CADM3;BTG1;PTPRZ1;ZMIZ1;ATN1;VIM;ZFP36L1
superficial stratum of r10BM	7/301	0.858633	0.999996	0	0	0.70904	0.108067	TOP2A;CDK6;TRIM28;DPYSL5;TRIB3;MKI67;SMARCA4
superficial stratum of r2BI	7/301	0.858633	0.999996	0	0	0.70904	0.108067	AHNAK;NRG4;SPP1;TARS;HLA-A;HSPG2;RPS13
superficial stratum of r3BI	7/301	0.858633	0.999996	0	0	0.70904	0.108067	AHNAK;NRG4;SPP1;TARS;TRIB3;HLA-A;RPS13
superficial stratum of r5BL	7/301	0.858633	0.999996	0	0	0.70904	0.108067	LGALS1;NRG4;PABPC4;RPL12;TRIB3;HLA-A;RPS13
superficial stratum of r7BL	7/301	0.858633	0.999996	0	0	0.70904	0.108067	TRIM28;NRG4;GPC2;HLA-A;LSS;EIF4B;ZMPSTE24
superficial stratum of r7Lim	7/301	0.858633	0.999996	0	0	0.70904	0.108067	ACLY;SYT4;MSN;TAGLN2;HLA-A;LSS;EIF4B
superficial stratum of r9Lim	7/301	0.858633	0.999996	0	0	0.70904	0.108067	TOP2A;SYT4;UNC5B;PRKDC;S100A4;YWHAZ;EIF4B
superficial stratum of the PBC	7/301	0.858633	0.999996	0	0	0.70904	0.108067	VAT1;SYT4;SPARC;PRDX1;RPS20;NCAM1;ADNP
superior periolivary nucleus	7/301	0.858633	0.999996	0	0	0.70904	0.108067	IL1RN;LGALS1;NRG4;SPP1;TARS;HLA-A;LCP1
temporal muscle trigeminal motor cell group	7/301	0.858633	0.999996	0	0	0.70904	0.108067	SLC10A4;CHRNA3;LGALS1;MSN;MVD;MMP9;AP2M1
ventral pallium	7/301	0.858633	0.999996	0	0	0.70904	0.108067	IL1RN;CDKN1A;IL1B;FABP7;DCX;PLIN2;SOX4
ventral paracommissural tectal nucleus, m1 part	7/301	0.858633	0.999996	0	0	0.70904	0.108067	FADS2;CCND1;RPL27A;PKIA;RPL37A;DDX21;SNCG
Field CA1, stratum radiatum	8/345	0.873195	0.999996	0	0	0.706445	0.0957912	PARP1;FOXG1;PLXNA1;CRMP1;TCF4;PFN1;SF3B1;DUSP6
Field CA1, stratum lacunosum-moleculare	9/383	0.875408	0.999996	0	0	0.715853	0.0952549	PARP1;FOXG1;LAPTM5;ISLR2;PLXNA1;CRMP1;SLIT3;PFN1;SF3B1
Medial mammillary nucleus	9/388	0.884297	0.999996	0	0	0.706222	0.0868388	IL1RN;DPYSL5;RPL12;S100A6;IGF2;SOX11;TRIB3;RPL37;TIMP1
Field CA3, stratum lacunosum-moleculare	10/432	0.895839	0.999996	0	0	0.704242	0.0774626	MMP14;IGFBP3;FOXG1;IGFBP2;LAPTM5;PLXNA1;ISLR2;SH3BGRL3;PFN1;VAMP2
Field CA2, stratum radiatum	9/410	0.917418	0.999996	0	0	0.666703	0.0574645	PARP1;FOXG1;PLXNA1;ISLR2;MYH9;CRMP1;TCF4;PFN1;VAMP2
superficial stratum of DG	14/601	0.923767	0.999996	0	0	0.707063	0.0560668	RPS7;PABPC4;RPL22;IGF2;STMN3;ISLR2;PROX1;SLC1A5;FOXM1;NCOR2;PKIA;PFN1;RPS13;XPR1
Accessory olfactory bulb	8/379	0.926534	0.999996	0	0	0.640556	0.048877	IL1RN;RAB31;KIF26A;IL1B;DCX;WHSC1;SOX4;SMARCA4
AOB, mitral cell layer	6/301	0.927117	0.999996	0	0	0.604712	0.0457619	IL1RN;KIF26A;IL1B;DCX;WHSC1;SOX4
Accessory olfactory bulb, mitral layer	6/301	0.927117	0.999996	0	0	0.604712	0.0457619	IL1RN;KIF26A;IL1B;DCX;WHSC1;SOX4
Agranular insular area, posterior part, layer 6a	6/301	0.927117	0.999996	0	0	0.604712	0.0457619	GNG2;CNOT1;PLAUR;ISLR2;ILF2;FDFT1
Agranular insular area, ventral part, layer 1	6/301	0.927117	0.999996	0	0	0.604712	0.0457619	DNAJA1;TYROBP;CNOT1;HNRNPF;S100A4;AP2M1
Anterior cingulate area, dorsal part, layer 2/3	6/301	0.927117	0.999996	0	0	0.604712	0.0457619	IL1RN;S100A6;SLC3A2;KIF21B;SLC7A1;SMARCA4
Anterior olfactory nucleus	6/301	0.927117	0.999996	0	0	0.604712	0.0457619	IL1RN;GDF15;KIF26A;CRABP1;DCX;SOX11
Anterior olfactory nucleus, external part	6/301	0.927117	0.999996	0	0	0.604712	0.0457619	IL1RN;GDF15;KIF26A;CRABP1;DCX;SMARCA4
Anterior olfactory nucleus, layer 1	6/301	0.927117	0.999996	0	0	0.604712	0.0457619	IL1RN;GDF15;KIF26A;LAPTM5;SOX11;NEUROG2
Anterior pretectal nucleus	6/301	0.927117	0.999996	0	0	0.604712	0.0457619	RSL1D1;NGRN;RGS16;LAPTM5;GATA3;PROX1
Anterolateral visual area, layer 2/3	6/301	0.927117	0.999996	0	0	0.604712	0.0457619	RGS4;CCL20;PLAUR;TNRC18;HMGCR;DUSP6
Anterolateral visual area, layer 6a	6/301	0.927117	0.999996	0	0	0.604712	0.0457619	LARP1;YWHAB;SSR2;PLAUR;SLC1A5;HMGCR
Auditory areas	6/301	0.927117	0.999996	0	0	0.604712	0.0457619	YWHAB;FTH1;PPT1;STMN4;TBX3;IER3
Basolateral amygdalar nucleus	6/301	0.927117	0.999996	0	0	0.604712	0.0457619	LARP1;CNOT1;NR2F1;PLAUR;ILF2;AP2M1
Basolateral amygdalar nucleus, posterior part	6/301	0.927117	0.999996	0	0	0.604712	0.0457619	DNAJA1;NR2F1;PLAUR;ADNP;ILF2;AP2M1
Cerebral cortex	6/301	0.927117	0.999996	0	0	0.604712	0.0457619	IL1RN;ENC1;DCX;TCF4;HMGCR;DUSP6
Cochlear nucleus, subpedunclular granular region	6/301	0.927117	0.999996	0	0	0.604712	0.0457619	RBM39;BTG1;IGFBP2;NEUROG2;WLS;ZFP36L1
Cortical amygdalar area	6/301	0.927117	0.999996	0	0	0.604712	0.0457619	MARCKSL1;TRIM28;CNOT1;PKIA;NR2F1;AP2M1
Cortical amygdalar area, posterior part, lateral zone	6/301	0.927117	0.999996	0	0	0.604712	0.0457619	MARCKSL1;TRIM28;SHMT2;CNOT1;PKIA;PRPH
Cortical amygdalar area, posterior part, lateral zone, layer 1	6/301	0.927117	0.999996	0	0	0.604712	0.0457619	MMP14;MARCKSL1;TRIM28;SHMT2;TRIB3;RPS13
Crus 1, granular layer	6/301	0.927117	0.999996	0	0	0.604712	0.0457619	CADM3;BTG1;PTPRZ1;ATN1;VIM;ZFP36L1
Culmen	6/301	0.927117	0.999996	0	0	0.604712	0.0457619	CADM3;BTG1;PTPRZ1;VIM;SNRNP200;TBX3
Cuneate nucleus	6/301	0.927117	0.999996	0	0	0.604712	0.0457619	IGFBP3;S100A6;PLIN2;MVD;YWHAZ;PHOX2A
Diagonal band nucleus	6/301	0.927117	0.999996	0	0	0.604712	0.0457619	SLC10A4;ALCAM;GAL;PABPC4;IL1B;UBA1
Entorhinal area, lateral part, layer 6a	6/301	0.927117	0.999996	0	0	0.604712	0.0457619	DNAJA1;CDH2;STMN4;PLIN2;LCP1;FDFT1
Entorhinal area, medial part, dorsal zone, layer 3	6/301	0.927117	0.999996	0	0	0.604712	0.0457619	TMEFF1;LARP1;CDH2;PLIN2;PTN;FDFT1
Field CA1, pyramidal layer	6/301	0.927117	0.999996	0	0	0.604712	0.0457619	FOXG1;TRIM2;PLXNA1;TCF4;PFN1;DUSP6
Field CA2, stratum pyramidale	6/301	0.927117	0.999996	0	0	0.604712	0.0457619	RGS5;FOXG1;STC2;PLXNA1;TCF4;PFN1
Flocculus, molecular layer	6/301	0.927117	0.999996	0	0	0.604712	0.0457619	BTG1;ITGB2;ATN1;LCP1;TBX3;ZFP36L1
Fundus of striatum	6/301	0.927117	0.999996	0	0	0.604712	0.0457619	ACAP3;RPL21;IL1B;CDC42EP3;GATA3;PRPH
Geniculate group, dorsal thalamus	6/301	0.927117	0.999996	0	0	0.604712	0.0457619	RPL18A;RGS16;UNC5C;GATA3;PROX1;BAZ1B
Geniculate group, ventral thalamus	6/301	0.927117	0.999996	0	0	0.604712	0.0457619	YWHAQ;RGS16;UNC5C;MVD;GATA3;LSS
Gustatory areas, layer 4	6/301	0.927117	0.999996	0	0	0.604712	0.0457619	LARP1;TYROBP;CNOT1;HNRNPF;PLAUR;PTN
Hemispheric regions	6/301	0.927117	0.999996	0	0	0.604712	0.0457619	CADM3;BTG1;PTPRZ1;ATN1;VIM;ZFP36L1
Hippocampal region	6/301	0.927117	0.999996	0	0	0.604712	0.0457619	NCOR2;FOXG1;RPL22;ISLR2;PROX1;PFN1
Inferior olivary complex	6/301	0.927117	0.999996	0	0	0.604712	0.0457619	TOP2A;TRIM28;TRIB3;TIMP1;RPS13;SMARCA4
Infralimbic area, layer 5	6/301	0.927117	0.999996	0	0	0.604712	0.0457619	CDKN1A;CRABP1;SURF4;S100A6;SLC3A2;DUSP6
Interposed nucleus	6/301	0.927117	0.999996	0	0	0.604712	0.0457619	TTR;SHMT2;ITGB2;SPRY4;DBI;PBX1
Lateral dorsal nucleus of thalamus	6/301	0.927117	0.999996	0	0	0.604712	0.0457619	RGS16;IGFBP2;SPRY4;ID4;WAC;UNC5C
Lobules IV-V	6/301	0.927117	0.999996	0	0	0.604712	0.0457619	CADM3;BTG1;PTPRZ1;VIM;SNRNP200;TBX3
Lobules IV-V, molecular layer	6/301	0.927117	0.999996	0	0	0.604712	0.0457619	CADM3;BTG1;PTPRZ1;VIM;SNRNP200;TBX3
Magnocellular nucleus	6/301	0.927117	0.999996	0	0	0.604712	0.0457619	RPL18A;PABPC4;STMN3;SLC1A5;FOXM1;AP2M1
Medial vestibular nucleus	6/301	0.927117	0.999996	0	0	0.604712	0.0457619	RGS5;TTR;PRKDC;IGFBP2;ITGB2;PHOX2A
Mediodorsal nucleus of the thalamus, central part	6/301	0.927117	0.999996	0	0	0.604712	0.0457619	RAB3C;RIMS3;RGS16;CTNNB1;PROX1;L1CAM
Midbrain reticular nucleus	6/301	0.927117	0.999996	0	0	0.604712	0.0457619	SLC10A4;RET;UNC5B;SNCG;GATA3;BCAT1
Midbrain, motor related	6/301	0.927117	0.999996	0	0	0.604712	0.0457619	SLC10A4;CHRNA3;RPS8;SNCG;EBF3;GATA3
Nucleus accumbens	6/301	0.927117	0.999996	0	0	0.604712	0.0457619	CAP1;ALCAM;ACTN1;CDC42EP3;ID4;DCX
Nucleus of the lateral olfactory tract, molecular layer	6/301	0.927117	0.999996	0	0	0.604712	0.0457619	ACAP3;MARCKSL1;LRBA;TRIB3;GATA3;SCG2
Nucleus of the solitary tract, gelatinous part	6/301	0.927117	0.999996	0	0	0.604712	0.0457619	RGS5;GDF15;ZNF704;IGFBP3;TAGLN2;PLIN2
OB inner plexiform layer	6/301	0.927117	0.999996	0	0	0.604712	0.0457619	IL1RN;CDKN1A;IL1B;FABP7;DCX;SOX4
OB mitral cell layer	6/301	0.927117	0.999996	0	0	0.604712	0.0457619	IL1RN;CDKN1A;FABP7;DCX;SOX4;VAMP2
OB olfactory fiber layer	6/301	0.927117	0.999996	0	0	0.604712	0.0457619	FCER1G;IL1B;FABP7;SPRY4;PLIN2;CNN3
Orbital area, lateral part, layer 1	6/301	0.927117	0.999996	0	0	0.604712	0.0457619	IL1RN;GDF15;SHC1;IL1B;LAPTM5;NEUROG2
Orbital area, lateral part, layer 2/3	6/301	0.927117	0.999996	0	0	0.604712	0.0457619	IL1RN;IL1B;LAPTM5;HDLBP;FOXM1;NEUROG2
Orbital area, medial part	6/301	0.927117	0.999996	0	0	0.604712	0.0457619	IL1RN;FCER1G;CRABP1;S100A6;HSPG2;NEUROG2
Orbital area, medial part, layer 1	6/301	0.927117	0.999996	0	0	0.604712	0.0457619	IL1RN;FCER1G;CRABP1;DCX;HSPG2;NEUROG2
Orbital area, medial part, layer 2/3	6/301	0.927117	0.999996	0	0	0.604712	0.0457619	IL1RN;FCER1G;GDF15;CRABP1;S100A6;NEUROG2
Pallidum	6/301	0.927117	0.999996	0	0	0.604712	0.0457619	SLC10A4;GAL;PEG10;CRABP1;CDC42EP3;GATA3
Pallidum, medial region	6/301	0.927117	0.999996	0	0	0.604712	0.0457619	SLC10A4;SYT4;ALCAM;GAL;PEG10;UBA1
Parabrachial nucleus, lateral division, dorsal lateral part	6/301	0.927117	0.999996	0	0	0.604712	0.0457619	CADM3;SPARC;CDK6;FABP7;RPS20;NCAM1
Paragigantocellular reticular nucleus	6/301	0.927117	0.999996	0	0	0.604712	0.0457619	TOP2A;TRIM28;NRG4;HLA-A;PBX1;PHOX2A
Paragigantocellular reticular nucleus, lateral part	6/301	0.927117	0.999996	0	0	0.604712	0.0457619	TOP2A;TRIM28;NRG4;HLA-A;EIF4B;PHOX2A
Parasubiculum, layer 3	6/301	0.927117	0.999996	0	0	0.604712	0.0457619	TMEFF1;CDH2;TCF4;GATA3;ILF2;PRPH
Piriform area, pyramidal layer	6/301	0.927117	0.999996	0	0	0.604712	0.0457619	ACTR2;TYROBP;ARHGDIA;PTN;HMGCR;PRPH
Pons, sensory related	6/301	0.927117	0.999996	0	0	0.604712	0.0457619	SLC10A4;LGALS1;AHNAK;PRDX1;SPP1;GATA3
Posterior complex of the thalamus	6/301	0.927117	0.999996	0	0	0.604712	0.0457619	RIMS3;RGS16;STMN4;ARHGEF2;L1CAM;IER3
Posterior limiting nucleus of the thalamus	6/301	0.927117	0.999996	0	0	0.604712	0.0457619	RIMS3;RPL21;RGS16;STMN4;GATA3;SCG2
Posterior parietal association areas	6/301	0.927117	0.999996	0	0	0.604712	0.0457619	CDKN1A;TNRC18;INSM2;HMGCR;HSPG2;DUSP6
Primary motor area	6/301	0.927117	0.999996	0	0	0.604712	0.0457619	TMEFF1;ACAP3;NGRN;TYROBP;SH3BGRL3;HMGCR
Primary somatosensory area, barrel field	6/301	0.927117	0.999996	0	0	0.604712	0.0457619	LASP1;LARP1;LRP1;PPT1;PLAUR;PTN
Primary somatosensory area, barrel field, layer 5	6/301	0.927117	0.999996	0	0	0.604712	0.0457619	LASP1;LARP1;LRP1;PPT1;INSM2;PTN
Primary somatosensory area, lower limb, layer 4	6/301	0.927117	0.999996	0	0	0.604712	0.0457619	CCL20;FOXG1;ENPP2;RPL27;TNRC18;HMGCR
Primary somatosensory area, trunk, layer 6b	6/301	0.927117	0.999996	0	0	0.604712	0.0457619	ACAP3;LASP1;LRP1;FASN;PPT1;HDLBP
Primary somatosensory area, unassigned, layer 4	6/301	0.927117	0.999996	0	0	0.604712	0.0457619	LARP1;CIRBP;PLAUR;TNRC18;INSM2;PTN
Purkinje cell layer of CbHCx	6/301	0.927117	0.999996	0	0	0.604712	0.0457619	CADM3;BTG1;PTPRZ1;ATN1;VIM;ZFP36L1
Purkinje cell layer of CbVCx	6/301	0.927117	0.999996	0	0	0.604712	0.0457619	CADM3;BTG1;PTPRZ1;VIM;SNRNP200;TBX3
Pyramus (VIII)	6/301	0.927117	0.999996	0	0	0.604712	0.0457619	BTG1;PTPRZ1;SPRY4;VIM;PBX1;TBX3
Pyramus (VIII), granular layer	6/301	0.927117	0.999996	0	0	0.604712	0.0457619	BTG1;PTPRZ1;SPRY4;VIM;PBX1;TBX3
Pyramus (VIII), molecular layer	6/301	0.927117	0.999996	0	0	0.604712	0.0457619	BTG1;PTPRZ1;SPRY4;VIM;PBX1;TBX3
Red nucleus	6/301	0.927117	0.999996	0	0	0.604712	0.0457619	SLC10A4;RET;PRKDC;SDC2;SNCG;FDFT1
Reticular nucleus of the thalamus	6/301	0.927117	0.999996	0	0	0.604712	0.0457619	RAB31;TTR;UNC5B;RGS16;NR2F1;ID4
Retrosplenial area, dorsal part	6/301	0.927117	0.999996	0	0	0.604712	0.0457619	TNRC18;S100A4;INSM2;SF3B1;DUSP6;SMARCA4
Retrosplenial area, dorsal part, layer 5	6/301	0.927117	0.999996	0	0	0.604712	0.0457619	CDKN1A;INSM2;SF3B1;RAB6B;DUSP6;SMARCA4
Secondary motor area, layer 5	6/301	0.927117	0.999996	0	0	0.604712	0.0457619	TMEFF1;TYROBP;KIF5C;SH3BGRL3;INSM2;PTN
Subiculum, ventral part, molecular layer	6/301	0.927117	0.999996	0	0	0.604712	0.0457619	GNG2;RPS7;FOXG1;RPL22;SLIT3;GATA3
Subiculum, ventral part, stratum radiatum	6/301	0.927117	0.999996	0	0	0.604712	0.0457619	LARP1;FOXG1;APEX1;IGFBP3;SLIT3;ADNP
Subparafascicular nucleus, parvicellular part	6/301	0.927117	0.999996	0	0	0.604712	0.0457619	RIMS3;YWHAQ;RGS16;GATA3;LSS;DDR2
Substantia innominata	6/301	0.927117	0.999996	0	0	0.604712	0.0457619	SLC10A4;CRABP1;CDC42EP3;GATA3;VAMP2;AP2M1
Subthalamic nucleus	6/301	0.927117	0.999996	0	0	0.604712	0.0457619	RET;GNG2;YWHAQ;MAB21L2;IGF2;TMBIM6
Superior colliculus, motor related, deep gray layer	6/301	0.927117	0.999996	0	0	0.604712	0.0457619	RPS8;STXBP1;RPL13;SNCG;GATA3;AGRN
Superior colliculus, motor related, intermediate gray layer, sublayer a	6/301	0.927117	0.999996	0	0	0.604712	0.0457619	CHRNA3;IGFBP3;SPRY4;LAPTM5;RPL27;PROX1
Superior colliculus, superficial gray layer	6/301	0.927117	0.999996	0	0	0.604712	0.0457619	MMP14;GDF15;RPL27;UBA1;SMC4;SMARCA4
Superior olivary complex	6/301	0.927117	0.999996	0	0	0.604712	0.0457619	LGALS1;NRG4;SPP1;TRIB3;HLA-A;RPS13
Supplemental somatosensory area	6/301	0.927117	0.999996	0	0	0.604712	0.0457619	LARP1;PPT1;PLAUR;TBX3;IER3;FDFT1
Supplemental somatosensory area, layer 6a	6/301	0.927117	0.999996	0	0	0.604712	0.0457619	LARP1;GNG2;PPT1;PLAUR;IER3;FDFT1
Supplemental somatosensory area, layer 6b	6/301	0.927117	0.999996	0	0	0.604712	0.0457619	LARP1;GNG2;PPT1;PLAUR;IER3;FDFT1
Taenia tecta, dorsal part, layer 1	6/301	0.927117	0.999996	0	0	0.604712	0.0457619	FCER1G;GDF15;CRABP1;S100A4;NEUROG2;DDR2
Taenia tecta, dorsal part, layer 2	6/301	0.927117	0.999996	0	0	0.604712	0.0457619	TMEFF1;FCER1G;GDF15;CRABP1;NEUROG2;DDR2
Taenia tecta, ventral part, layer 3	6/301	0.927117	0.999996	0	0	0.604712	0.0457619	TMEFF1;ACTR2;PTN;YBX1;GATA2;VAMP2
Tegmental reticular nucleus	6/301	0.927117	0.999996	0	0	0.604712	0.0457619	GRN;STXBP1;ATP5A1;MAB21L2;SPP1;SLC7A1
Temporal association areas, layer 6a	6/301	0.927117	0.999996	0	0	0.604712	0.0457619	GNG2;YWHAB;PLAUR;STMN4;PLIN2;TBX3
Uvula (IX), molecular layer	6/301	0.927117	0.999996	0	0	0.604712	0.0457619	RGS5;BTG1;PTPRZ1;IGFBP3;PLIN2;VIM
Ventral posterior complex of the thalamus	6/301	0.927117	0.999996	0	0	0.604712	0.0457619	RGS16;NR2F1;MYO5A;UNC5C;L1CAM;CLASP2
Ventral posterolateral nucleus of the thalamus	6/301	0.927117	0.999996	0	0	0.604712	0.0457619	RAB31;RGS16;NR2F1;ID4;UNC5C;CLASP2
Ventral posteromedial nucleus of the thalamus, parvicellular part	6/301	0.927117	0.999996	0	0	0.604712	0.0457619	YWHAQ;IL1B;RGS16;L1CAM;LSS;DDR2
Vermal regions	6/301	0.927117	0.999996	0	0	0.604712	0.0457619	CADM3;BTG1;PTPRZ1;VIM;SNRNP200;TBX3
Visual areas	6/301	0.927117	0.999996	0	0	0.604712	0.0457619	CDKN1A;TNRC18;INSM2;PTN;HMGCR;DUSP6
accessory entopeduncular nucleus (post-migratory)	6/301	0.927117	0.999996	0	0	0.604712	0.0457619	RET;GNG2;YWHAQ;MAB21L2;VAMP2;ATP9A
accumbens nucleus, shell domain	6/301	0.927117	0.999996	0	0	0.604712	0.0457619	ALCAM;TSC22D1;YBX1;GATA2;FOXM1;PHLDA1
alar plate of p1	6/301	0.927117	0.999996	0	0	0.604712	0.0457619	RSL1D1;CHRNA3;RGS16;LAPTM5;RPL24;PROX1
anterior cortical amygdaloid area	6/301	0.927117	0.999996	0	0	0.604712	0.0457619	RBM39;MARCKSL1;TRIM28;SHMT2;SCG2;PRPH
anterior pretectal nucleus, dorsal core part	6/301	0.927117	0.999996	0	0	0.604712	0.0457619	NGRN;RIMS3;RGS16;LAPTM5;STMN4;S100A4
basal plate of m1	6/301	0.927117	0.999996	0	0	0.604712	0.0457619	SLC10A4;RET;ACLY;SDC2;SPP1;SNCG
bed nucleus of stria terminalis, lateral amygdaloid division	6/301	0.927117	0.999996	0	0	0.604712	0.0457619	CD63;FADS2;TTR;ITGB2;DBI;LSS
caudal linear (raphe) nucleus	6/301	0.927117	0.999996	0	0	0.604712	0.0457619	SLC10A4;FTH1;SDC2;PNOC;CEBPG;YWHAZ
central subpallium (classic basal ganglia)	6/301	0.927117	0.999996	0	0	0.604712	0.0457619	CAP1;RGS4;TTYH1;ACTN1;CDC42EP3;ID4
cerebellar hemisphere	6/301	0.927117	0.999996	0	0	0.604712	0.0457619	CADM3;BTG1;PTPRZ1;ATN1;VIM;ZFP36L1
cerebellar vermis	6/301	0.927117	0.999996	0	0	0.604712	0.0457619	CADM3;BTG1;PTPRZ1;VIM;SNRNP200;TBX3
commissural pretectal domain	6/301	0.927117	0.999996	0	0	0.604712	0.0457619	CHRNA3;PKIA;LAPTM5;RPL27;PROX1;PRDX6
cortex of cerebellar vermis	6/301	0.927117	0.999996	0	0	0.604712	0.0457619	CADM3;BTG1;PTPRZ1;VIM;SNRNP200;TBX3
dorsal juxtacommissural pretectal nucleus	6/301	0.927117	0.999996	0	0	0.604712	0.0457619	FADS2;CHRNA3;AHNAK;SDC2;DBI;PRDX6
dorsal lateral geniculate nucleus	6/301	0.927117	0.999996	0	0	0.604712	0.0457619	RGS16;UNC5C;HNRNPC;PROX1;BAZ1B;CLASP2
dorsal paracommissural tectal nucleus, m1 part	6/301	0.927117	0.999996	0	0	0.604712	0.0457619	CCND1;RPS8;RPL37A;CTNNB1;SNCG;RPS24
dorsal part of JcP	6/301	0.927117	0.999996	0	0	0.604712	0.0457619	FADS2;CHRNA3;SDC2;FABP7;DBI;PRDX6
dorsal subnucleus of MG	6/301	0.927117	0.999996	0	0	0.604712	0.0457619	RPL18A;PKIA;RGS16;IGF2;PROX1;FGFBP3
dorsomedial tegmental nucleus	6/301	0.927117	0.999996	0	0	0.604712	0.0457619	SLC10A4;YARS;KIF26A;PNOC;AGRN;PHOX2A
frontal cortex	6/301	0.927117	0.999996	0	0	0.604712	0.0457619	TMEFF1;ACAP3;IL1RN;TYROBP;SH3BGRL3;ADNP
intercalate nucleus	6/301	0.927117	0.999996	0	0	0.604712	0.0457619	RAB31;RGS16;PNOC;NR2F1;ID4;RPL27
intermediate pretectal nucleus	6/301	0.927117	0.999996	0	0	0.604712	0.0457619	CHRNA3;CEBPG;CTNNB1;RPL27;FGFBP3;YWHAG
intermediate stratum of CoPD	6/301	0.927117	0.999996	0	0	0.604712	0.0457619	CHRNA3;PKIA;SPRY4;RPL27;PROX1;PRRC2A
intermediate stratum of JcPD	6/301	0.927117	0.999996	0	0	0.604712	0.0457619	FADS2;CHRNA3;SDC2;FABP7;DBI;PRDX6
intermediate stratum of Mam	6/301	0.927117	0.999996	0	0	0.604712	0.0457619	IL1RN;IGF2;S100A6;TRIB3;RPL37;TIMP1
intermediate stratum of OB	6/301	0.927117	0.999996	0	0	0.604712	0.0457619	IL1RN;CDKN1A;IL1B;FABP7;DCX;SOX4
intermediate stratum of Pal	6/301	0.927117	0.999996	0	0	0.604712	0.0457619	RGS4;TTYH1;ACTN1;CRABP1;CDC42EP3;PBX1
intermediate stratum of PcPL	6/301	0.927117	0.999996	0	0	0.604712	0.0457619	NGRN;RIMS3;RGS16;LAPTM5;STMN4;S100A4
intermediate stratum of SeStr	6/301	0.927117	0.999996	0	0	0.604712	0.0457619	ALCAM;TSC22D1;YBX1;GATA2;FOXM1;PHLDA1
intermediate stratum of VTTh	6/301	0.927117	0.999996	0	0	0.604712	0.0457619	RIMS3;YWHAQ;RGS16;L1CAM;LSS;IER3
intermediate stratum of p3ZL	6/301	0.927117	0.999996	0	0	0.604712	0.0457619	RAB31;RGS16;PNOC;NR2F1;ID4;RPL27
intermediate stratum of r10BL	6/301	0.927117	0.999996	0	0	0.604712	0.0457619	TOP2A;NRG4;HMGA1;TARS;S100A4;YWHAZ
intermediate stratum of r2BI	6/301	0.927117	0.999996	0	0	0.604712	0.0457619	YARS;KIF26A;KIF5B;SPP1;HMGA1;AGRN
intermediate stratum of r9BL	6/301	0.927117	0.999996	0	0	0.604712	0.0457619	TOP2A;NRG4;HMGA1;TARS;S100A4;MKI67
intermediate stratum of r9Tr	6/301	0.927117	0.999996	0	0	0.604712	0.0457619	MVD;SLC38A2;YWHAZ;EIF4B;ZMPSTE24;PHOX2A
internal globus pallidus	6/301	0.927117	0.999996	0	0	0.604712	0.0457619	RAB31;UNC5B;CCL20;CRABP1;LSS;PBX1
intralaminar nuclei	6/301	0.927117	0.999996	0	0	0.604712	0.0457619	RIMS3;RGS16;CTNNB1;TARS;PROX1;L1CAM
isthmic alar plate	6/301	0.927117	0.999996	0	0	0.604712	0.0457619	CADM3;BTG1;PTPRZ1;VIM;SNRNP200;TBX3
isthmic liminal reticular area	6/301	0.927117	0.999996	0	0	0.604712	0.0457619	SLC10A4;PCSK1N;RPS18;STC2;RPS6;RPS20
isthmic part of the periaqueductal gray	6/301	0.927117	0.999996	0	0	0.604712	0.0457619	RPS18;SHMT2;PLXNA1;RPS20;RPL37;WHSC1
isthmus	6/301	0.927117	0.999996	0	0	0.604712	0.0457619	CADM3;BTG1;PTPRZ1;VIM;SNRNP200;TBX3
lateral IC periaqueductal gray	6/301	0.927117	0.999996	0	0	0.604712	0.0457619	RPS8;HMGA1;SNCG;EBF3;RPL26;DDR2
lateral TG part of the periaqueductal gray	6/301	0.927117	0.999996	0	0	0.604712	0.0457619	UNC5B;RPS8;STXBP1;TTC3;HNRNPA2B1;SNCG
lateral part of CoP	6/301	0.927117	0.999996	0	0	0.604712	0.0457619	CHRNA3;PKIA;LAPTM5;RPL24;RPL27;PROX1
lateral part of MM	6/301	0.927117	0.999996	0	0	0.604712	0.0457619	IL1RN;FCER1G;RPL12;S100A6;TRIB3;RPL37
lateral part of alar p3	6/301	0.927117	0.999996	0	0	0.604712	0.0457619	RAB31;TTR;RGS16;PNOC;NR2F1;ID4
lateral part of preisthmic periaqueductal gray	6/301	0.927117	0.999996	0	0	0.604712	0.0457619	RPS18;RPS8;HMGA1;SNCG;EBF3;AGRN
lateral part of r10B	6/301	0.927117	0.999996	0	0	0.604712	0.0457619	TOP2A;NRG4;HMGA1;TARS;S100A4;YWHAZ
lateral part of r5B	6/301	0.927117	0.999996	0	0	0.604712	0.0457619	LGALS1;NRG4;PABPC4;RPL12;SPP1;TARS
lateral part of r9B	6/301	0.927117	0.999996	0	0	0.604712	0.0457619	TOP2A;NRG4;HMGA1;TARS;S100A4;MKI67
lateropallial amygdalopiriform area	6/301	0.927117	0.999996	0	0	0.604712	0.0457619	MARCKSL1;CNOT1;YWHAB;NR2F1;LCP1;PRPH
layer 1 of PrS	6/301	0.927117	0.999996	0	0	0.604712	0.0457619	HNRNPK;GDF15;PKIA;PROX1;VIM;P4HB
layer 4 of CCx	6/301	0.927117	0.999996	0	0	0.604712	0.0457619	MYO5A;TCF4;HMGCR;GATA2;DUSP6;SEPT3
layer 4 of PCx	6/301	0.927117	0.999996	0	0	0.604712	0.0457619	RGS4;LASP1;ENPP2;TNRC18;INSM2;PTN
layer 4 of PaS	6/301	0.927117	0.999996	0	0	0.604712	0.0457619	CDH2;PLAUR;TCF4;SLC1A5;ILF2;VAMP2
layer 5 of PRh-Ect	6/301	0.927117	0.999996	0	0	0.604712	0.0457619	DNAJA1;RBM39;SSR2;PLAUR;STMN4;HNRNPC
layer 6 of PaS	6/301	0.927117	0.999996	0	0	0.604712	0.0457619	CAP1;CDKN1A;NR2F1;HDGF;TCF4;PAFAH1B1
layer 6a of PaS	6/301	0.927117	0.999996	0	0	0.604712	0.0457619	CAP1;CCL20;STC2;NR2F1;HDGF;TCF4
liminal part of r4 alar plate	6/301	0.927117	0.999996	0	0	0.604712	0.0457619	SLC10A4;LGALS1;PRDX1;SPP1;GPC2;MMP9
liminal part of the r10 alar plate	6/301	0.927117	0.999996	0	0	0.604712	0.0457619	SLC10A4;ACLY;LGALS1;GAL;MSN;YWHAZ
m1 (rostral) midbrain tegmentum	6/301	0.927117	0.999996	0	0	0.604712	0.0457619	SLC10A4;RET;ACLY;SDC2;SPP1;SNCG
mammillary area	6/301	0.927117	0.999996	0	0	0.604712	0.0457619	IL1RN;IGF2;S100A6;TRIB3;RPL37;TIMP1
mammillary part of THyB	6/301	0.927117	0.999996	0	0	0.604712	0.0457619	IL1RN;IGF2;S100A6;TRIB3;RPL37;TIMP1
mantle zone of AStr	6/301	0.927117	0.999996	0	0	0.604712	0.0457619	TTR;RPL21;ITGB2;ILF2;XPR1;PRPH
mantle zone of CbH	6/301	0.927117	0.999996	0	0	0.604712	0.0457619	CADM3;BTG1;PTPRZ1;ATN1;VIM;ZFP36L1
mantle zone of CoPL	6/301	0.927117	0.999996	0	0	0.604712	0.0457619	CHRNA3;PKIA;LAPTM5;RPL24;RPL27;PROX1
mantle zone of CoPV	6/301	0.927117	0.999996	0	0	0.604712	0.0457619	UNC5B;RPL27A;RPL24;ATP5G3;AGRN;PRDX6
mantle zone of FCx	6/301	0.927117	0.999996	0	0	0.604712	0.0457619	TMEFF1;ACAP3;IL1RN;TYROBP;SH3BGRL3;ADNP
mantle zone of JcPD	6/301	0.927117	0.999996	0	0	0.604712	0.0457619	FADS2;CHRNA3;SDC2;FABP7;DBI;PRDX6
mantle zone of LPrP	6/301	0.927117	0.999996	0	0	0.604712	0.0457619	ACTR2;TYROBP;GNG2;ARHGDIA;ISLR2;PTN
mantle zone of Mam	6/301	0.927117	0.999996	0	0	0.604712	0.0457619	IL1RN;IGF2;S100A6;TRIB3;RPL37;TIMP1
mantle zone of OB	6/301	0.927117	0.999996	0	0	0.604712	0.0457619	IL1RN;CDKN1A;IL1B;FABP7;DCX;SOX4
mantle zone of PCx	6/301	0.927117	0.999996	0	0	0.604712	0.0457619	RGS4;ENC1;TNRC18;INSM2;PTN;DUSP6
mantle zone of PrS	6/301	0.927117	0.999996	0	0	0.604712	0.0457619	TMEFF1;HNRNPK;RPL22;TCF4;PROX1;ILF2
mantle zone of RtC	6/301	0.927117	0.999996	0	0	0.604712	0.0457619	RAB31;TTR;RGS16;PNOC;NR2F1;ID4
mantle zone of StrSe	6/301	0.927117	0.999996	0	0	0.604712	0.0457619	SOX2;SYT4;ALCAM;ID4;EBF3;XPR1
mantle zone of cerebellar vermis	6/301	0.927117	0.999996	0	0	0.604712	0.0457619	CADM3;BTG1;PTPRZ1;VIM;SNRNP200;TBX3
mantle zone of m1B	6/301	0.927117	0.999996	0	0	0.604712	0.0457619	SLC10A4;RET;ACLY;SDC2;SPP1;SNCG
mantle zone of r10BL	6/301	0.927117	0.999996	0	0	0.604712	0.0457619	TOP2A;NRG4;HMGA1;TARS;S100A4;YWHAZ
mantle zone of r10Lim	6/301	0.927117	0.999996	0	0	0.604712	0.0457619	SLC10A4;ACLY;LGALS1;GAL;MSN;YWHAZ
mantle zone of r10Tr	6/301	0.927117	0.999996	0	0	0.604712	0.0457619	SLC10A4;GAL;EBF3;TAGLN2;PLIN2;YWHAZ
mantle zone of r4Lim	6/301	0.927117	0.999996	0	0	0.604712	0.0457619	SLC10A4;LGALS1;PRDX1;SPP1;GPC2;MMP9
mantle zone of r5BL	6/301	0.927117	0.999996	0	0	0.604712	0.0457619	LGALS1;NRG4;PABPC4;RPL12;SPP1;TARS
mantle zone of r6Co	6/301	0.927117	0.999996	0	0	0.604712	0.0457619	FADS2;MMP14;CCL20;ENPP2;LCP1;WLS
mantle zone of r9BL	6/301	0.927117	0.999996	0	0	0.604712	0.0457619	TOP2A;NRG4;HMGA1;TARS;S100A4;MKI67
mantle zone of the IG	6/301	0.927117	0.999996	0	0	0.604712	0.0457619	S100A4;SLC3A2;SMC4;HSPG2;NEUROG2;DDR2
medial amygdala, posteroventral part	6/301	0.927117	0.999996	0	0	0.604712	0.0457619	MARCKSL1;TRIM28;LRBA;PKIA;LAPTM5;AP2M1
medial geniculate nucleus	6/301	0.927117	0.999996	0	0	0.604712	0.0457619	RPL18A;PKIA;RGS16;RPL11;IGF2;FGFBP3
molecular layer of CbVCx	6/301	0.927117	0.999996	0	0	0.604712	0.0457619	CADM3;BTG1;PTPRZ1;VIM;SNRNP200;TBX3
olfactory bulb, principal part	6/301	0.927117	0.999996	0	0	0.604712	0.0457619	IL1RN;CDKN1A;IL1B;FABP7;DCX;SOX4
p1 part of the substantia nigra reticulata	6/301	0.927117	0.999996	0	0	0.604712	0.0457619	SLC10A4;GRN;AHNAK;PABPC4;IGF2;MMP9
p3 portion of the substantia nigra pars reticulata	6/301	0.927117	0.999996	0	0	0.604712	0.0457619	MMP14;FOXG1;STC2;PABPC4;IGF2;TRIB3
paraterete nucleus	6/301	0.927117	0.999996	0	0	0.604712	0.0457619	GRN;PCSK1N;MARCKSL1;PABPC4;IGF2;FOXM1
parietal cortex	6/301	0.927117	0.999996	0	0	0.604712	0.0457619	RGS4;ENC1;TNRC18;INSM2;PTN;DUSP6
parvicellular (lateral) subparafascicular nucleus	6/301	0.927117	0.999996	0	0	0.604712	0.0457619	RIMS3;YWHAQ;RGS16;L1CAM;LSS;IER3
perirhinal-ectorhinal cortex	6/301	0.927117	0.999996	0	0	0.604712	0.0457619	DNAJA1;RBM39;PLAUR;HMGCR;RPS27A;FDFT1
periventricular stratum of APal	6/301	0.927117	0.999996	0	0	0.604712	0.0457619	CD63;FADS2;TTR;ITGB2;DBI;LSS
periventricular stratum of Ist	6/301	0.927117	0.999996	0	0	0.604712	0.0457619	RPS18;SHMT2;PLXNA1;RPS20;RPL37;WHSC1
periventricular stratum of RMa	6/301	0.927117	0.999996	0	0	0.604712	0.0457619	IL1RN;IGF2;S100A6;S100A4;TIMP1;VIM
periventricular stratum of m2AL	6/301	0.927117	0.999996	0	0	0.604712	0.0457619	RPS18;RPS8;HMGA1;SNCG;EBF3;AGRN
periventricular stratum of r2BM	6/301	0.927117	0.999996	0	0	0.604712	0.0457619	RGS5;SYT4;KIF26A;HNRNPA2B1;IGFBP2;YBX1
periventricular stratum of r2Lim	6/301	0.927117	0.999996	0	0	0.604712	0.0457619	SLC10A4;FADS2;SURF4;IGFBP2;PLIN2;PHOX2A
periventricular stratum of r7Co	6/301	0.927117	0.999996	0	0	0.604712	0.0457619	FADS2;MMP14;CCL20;ENPP2;LCP1;WLS
posterior (ventral) nucleus	6/301	0.927117	0.999996	0	0	0.604712	0.0457619	RIMS3;RGS16;STMN4;UNC5C;L1CAM;IER3
precommissural pretectal domain	6/301	0.927117	0.999996	0	0	0.604712	0.0457619	NGRN;RIMS3;SHC1;RGS16;LAPTM5;PROX1
pretectum	6/301	0.927117	0.999996	0	0	0.604712	0.0457619	RSL1D1;CHRNA3;RGS16;LAPTM5;RPL24;PROX1
prethalamic (p3) zona limitans domain	6/301	0.927117	0.999996	0	0	0.604712	0.0457619	RAB31;RGS16;PNOC;NR2F1;UNC5C;LSS
prethalamus	6/301	0.927117	0.999996	0	0	0.604712	0.0457619	RAB31;TTR;RGS16;PNOC;NR2F1;ID4
prosomere 1	6/301	0.927117	0.999996	0	0	0.604712	0.0457619	CHRNA3;SDC2;RGS16;LAPTM5;PROX1;LSS
pyramidal layer of IG	6/301	0.927117	0.999996	0	0	0.604712	0.0457619	S100A4;SLC3A2;SMC4;HSPG2;NEUROG2;DDR2
r1 alar plate	6/301	0.927117	0.999996	0	0	0.604712	0.0457619	CADM3;BTG1;PTPRZ1;ATN1;VIM;ZFP36L1
r1 basal plate	6/301	0.927117	0.999996	0	0	0.604712	0.0457619	VAT1;SLC10A4;YARS;AHNAK;SNCG;MVD
r10 part of basolateral reticular formation	6/301	0.927117	0.999996	0	0	0.604712	0.0457619	TOP2A;NRG4;HMGA1;TARS;S100A4;YWHAZ
r10 part of the inferior olive	6/301	0.927117	0.999996	0	0	0.604712	0.0457619	TOP2A;CDK6;TRIM28;DPYSL5;TRIB3;MKI67
r10 part of the trigeminal column	6/301	0.927117	0.999996	0	0	0.604712	0.0457619	SLC10A4;GAL;EBF3;TAGLN2;PLIN2;YWHAZ
r2 part of basolateral reticular formation	6/301	0.927117	0.999996	0	0	0.604712	0.0457619	VAT1;SLC10A4;YARS;GAL;SNCG;PHOX2A
r2 part of nucleus subcoeruleus	6/301	0.927117	0.999996	0	0	0.604712	0.0457619	YARS;UNC5B;PRKDC;HMGA1;AGRN;PHOX2A
r3 basal plate	6/301	0.927117	0.999996	0	0	0.604712	0.0457619	SLC7A5;AHNAK;SPP1;HMGA1;NEFL;TARS
r3 part of spinal trigeminal sensory column, oral part	6/301	0.927117	0.999996	0	0	0.604712	0.0457619	EML4;ACAP3;YWHAQ;HNRNPA2B1;EBF3;LSS
r4 part of medial paralemniscal nucleus	6/301	0.927117	0.999996	0	0	0.604712	0.0457619	YWHAQ;LRBA;SPP1;UBA1;SLC38A2;YWHAZ
r6 part of the cochlear column	6/301	0.927117	0.999996	0	0	0.604712	0.0457619	FADS2;MMP14;CCL20;ENPP2;LCP1;WLS
r7 part of the dorsal cochlear nucleus	6/301	0.927117	0.999996	0	0	0.604712	0.0457619	FADS2;MMP14;CCL20;ENPP2;LCP1;WLS
r9 part of the basolateral reticular formation	6/301	0.927117	0.999996	0	0	0.604712	0.0457619	TOP2A;NRG4;HMGA1;TARS;S100A4;MKI67
reticular complex	6/301	0.927117	0.999996	0	0	0.604712	0.0457619	RAB31;TTR;RGS16;PNOC;NR2F1;ID4
retromammillary area, medial part	6/301	0.927117	0.999996	0	0	0.604712	0.0457619	IL1RN;IGF2;S100A6;S100A4;TIMP1;VIM
retrotrapezoid nucleus	6/301	0.927117	0.999996	0	0	0.604712	0.0457619	LGALS1;NRG4;RPL12;MSN;HLA-A;RPS13
septostriatal part of the olfactory tuberculum	6/301	0.927117	0.999996	0	0	0.604712	0.0457619	GRN;SHMT2;GDF15;SHC1;NRG4;TNRC18
striatal amygdala	6/301	0.927117	0.999996	0	0	0.604712	0.0457619	TTR;RPL21;ITGB2;ILF2;XPR1;PRPH
subbrachial nucleus, rostral part	6/301	0.927117	0.999996	0	0	0.604712	0.0457619	GRN;SPARC;EIF3L;ITGB2;IGF2;YWHAZ
sublayer 6b of CCx	6/301	0.927117	0.999996	0	0	0.604712	0.0457619	TOP2A;GNB1;MYO5A;HMGCR;FOXM1;SEPT3
superficial stratum of FCx (cortical plate/marginal zone)	6/301	0.927117	0.999996	0	0	0.604712	0.0457619	TMEFF1;ACAP3;IL1RN;TYROBP;SH3BGRL3;ADNP
superficial stratum of OB	6/301	0.927117	0.999996	0	0	0.604712	0.0457619	IL1RN;FCER1G;IL1B;FABP7;PLIN2;CNN3
superficial stratum of PCx (cortical plate/marginal zone)	6/301	0.927117	0.999996	0	0	0.604712	0.0457619	RGS4;ENC1;TNRC18;INSM2;PTN;DUSP6
superficial stratum of PHyB-V	6/301	0.927117	0.999996	0	0	0.604712	0.0457619	GRN;PCSK1N;MARCKSL1;PABPC4;IGF2;FOXM1
superficial stratum of PrS (cortical plate/marginal zone)	6/301	0.927117	0.999996	0	0	0.604712	0.0457619	TMEFF1;HNRNPK;RPL22;TCF4;PROX1;ILF2
superficial stratum of RtC	6/301	0.927117	0.999996	0	0	0.604712	0.0457619	YWHAQ;CRABP1;MSN;MVD;LSS;DDR2
superficial stratum of SeStr	6/301	0.927117	0.999996	0	0	0.604712	0.0457619	GRN;SHMT2;GDF15;SHC1;NRG4;TNRC18
superficial stratum of VTTh	6/301	0.927117	0.999996	0	0	0.604712	0.0457619	RPL18A;PKIA;RGS16;RPL11;IGF2;FGFBP3
superficial stratum of cerebellar vermis	6/301	0.927117	0.999996	0	0	0.604712	0.0457619	CADM3;BTG1;PTPRZ1;VIM;SNRNP200;TBX3
superficial stratum of m1AD	6/301	0.927117	0.999996	0	0	0.604712	0.0457619	CCND1;RPS8;RPL37A;CTNNB1;SNCG;RPS24
superficial stratum of p2B	6/301	0.927117	0.999996	0	0	0.604712	0.0457619	SLC10A4;RET;AHNAK;SDC2;PABPC4;IGF2
superficial stratum of r3Tr	6/301	0.927117	0.999996	0	0	0.604712	0.0457619	EML4;ACAP3;YWHAQ;HNRNPA2B1;EBF3;LSS
superficial stratum of r4BL	6/301	0.927117	0.999996	0	0	0.604712	0.0457619	NRG4;LRBA;SPP1;TRIB3;RPL37;YWHAZ
superficial stratum of r6BL	6/301	0.927117	0.999996	0	0	0.604712	0.0457619	LGALS1;NRG4;RPL12;MSN;HLA-A;RPS13
superficial stratum of r9BL	6/301	0.927117	0.999996	0	0	0.604712	0.0457619	TOP2A;TRIM28;NRG4;TARS;S100A4;EIF4B
superficial stratum of the IG	6/301	0.927117	0.999996	0	0	0.604712	0.0457619	S100A4;SLC3A2;SMC4;HSPG2;NEUROG2;DDR2
superficial stratum of the VAP	6/301	0.927117	0.999996	0	0	0.604712	0.0457619	MARCKSL1;RPS7;SHMT2;CNOT1;PKIA;NR2F1
ventral nuclei	6/301	0.927117	0.999996	0	0	0.604712	0.0457619	RIMS3;RGS16;NR2F1;MYO5A;PROX1;L1CAM
ventral part of CoP	6/301	0.927117	0.999996	0	0	0.604712	0.0457619	UNC5B;RPL27A;RPL24;ATP5G3;AGRN;PRDX6
ventral subnucleus of MG	6/301	0.927117	0.999996	0	0	0.604712	0.0457619	RPL18A;PKIA;RGS16;RPL11;IGF2;BAZ1B
ventrolateral periolivary nucleus	6/301	0.927117	0.999996	0	0	0.604712	0.0457619	SLC10A4;LGALS1;NRG4;RPL12;GPC2;TRIB3
zonal layer of SC	6/301	0.927117	0.999996	0	0	0.604712	0.0457619	MMP14;GDF15;S100A6;UBA1;SMC4;SMARCA4
Subiculum	8/389	0.937964	0.999996	0	0	0.623415	0.0399256	TMEFF1;XPOT;YWHAB;APEX1;FOXG1;RPL22;SLIT3;GATA3
Paracentral nucleus	7/353	0.941606	0.999996	0	0	0.600835	0.0361511	RIMS3;SHC1;RGS16;TARS;PROX1;L1CAM;FOXM1
Suprageniculate nucleus	10/478	0.948651	0.999996	0	0	0.633478	0.0333932	RIMS3;RPL18A;SHC1;RGS16;STMN4;UNC5C;GATA3;PROX1;FGFBP3;BAZ1B
mantle zone of DG	13/599	0.953649	0.999996	0	0	0.656676	0.0311658	SLC10A4;RPS7;PABPC4;RPL22;CRABP1;RPLP0;ISLR2;PROX1;NCOR2;PKIA;FAU;PFN1;XPR1
Nucleus of the lateral olfactory tract	7/373	0.959604	0.999996	0	0	0.567405	0.0233968	ACAP3;MARCKSL1;RPL21;LRBA;GATA3;SCG2;AP2M1
Lateral mammillary nucleus	7/384	0.967211	0.999996	0	0	0.550531	0.0183539	AHNAK;PABPC4;RPL12;IGF2;TIMP1;FOXM1;RPS13
AOB, outer plexiform layer	5/301	0.968326	0.999996	0	0	0.501416	0.0161388	IL1RN;KIF26A;IL1B;DCX;SOX4
Abducens nucleus	5/301	0.968326	0.999996	0	0	0.501416	0.0161388	SYT4;KIF26A;CEBPG;WHSC1;PHOX2A
Anterior cingulate area	5/301	0.968326	0.999996	0	0	0.501416	0.0161388	SQLE;S100A6;SLC3A2;KIF21B;DUSP6
Anterior cingulate area, dorsal part	5/301	0.968326	0.999996	0	0	0.501416	0.0161388	S100A6;SLC3A2;KIF21B;SLC7A1;DUSP6
Anterior cingulate area, ventral part	5/301	0.968326	0.999996	0	0	0.501416	0.0161388	SQLE;S100A6;SLC3A2;DUSP6;NEUROG2
Anterior cingulate area, ventral part, layer 5	5/301	0.968326	0.999996	0	0	0.501416	0.0161388	SQLE;SURF4;FLNA;DUSP6;SREBF2
Anterior olfactory nucleus, lateral part	5/301	0.968326	0.999996	0	0	0.501416	0.0161388	IL1RN;GDF15;KIF26A;DCX;SOX4
Anterolateral visual area, layer 6b	5/301	0.968326	0.999996	0	0	0.501416	0.0161388	MYL6;PLAUR;ATP2A2;HMGCR;IER3
Anteromedial visual area	5/301	0.968326	0.999996	0	0	0.501416	0.0161388	CDKN1A;TNRC18;INSM2;HMGCR;DUSP6
Anteromedial visual area, layer 2/3	5/301	0.968326	0.999996	0	0	0.501416	0.0161388	RGS4;CDKN1A;ENC1;TNRC18;DUSP6
Brain stem	5/301	0.968326	0.999996	0	0	0.501416	0.0161388	SLC10A4;SHC1;RGS16;CRABP1;GATA3
Cerebrum	5/301	0.968326	0.999996	0	0	0.501416	0.0161388	ACTN1;ENC1;CDC42EP3;DCX;DUSP6
Cortical amygdalar area, posterior part, medial zone, layer 2	5/301	0.968326	0.999996	0	0	0.501416	0.0161388	MARCKSL1;TRIM28;PKIA;CDH13;PGM2L1
Cortical plate	5/301	0.968326	0.999996	0	0	0.501416	0.0161388	IL1RN;ENC1;DCX;TCF4;DUSP6
Dorsal cochlear nucleus	5/301	0.968326	0.999996	0	0	0.501416	0.0161388	MMP14;TTR;CCL20;ENPP2;LCP1
Ectorhinal area	5/301	0.968326	0.999996	0	0	0.501416	0.0161388	SPRY4;PLIN2;INSM2;RPS27A;TBX3
Ectorhinal area/Layer 5	5/301	0.968326	0.999996	0	0	0.501416	0.0161388	YWHAB;PLIN2;INSM2;RPS27A;TBX3
Endopiriform nucleus, ventral part	5/301	0.968326	0.999996	0	0	0.501416	0.0161388	DNAJA1;PLAUR;LCP1;AP2M1;PRPH
Entorhinal area, medial part, dorsal zone, layer 4	5/301	0.968326	0.999996	0	0	0.501416	0.0161388	DNAJA1;LARP1;CDH2;VAMP2;FDFT1
Entorhinal area, medial part, dorsal zone, layer 6	5/301	0.968326	0.999996	0	0	0.501416	0.0161388	LARP1;CDH2;CPE;ILF2;FDFT1
Entorhinal area, medial part, ventral zone, layer 2	5/301	0.968326	0.999996	0	0	0.501416	0.0161388	LARP1;TSC22D1;CNOT1;FOXG1;HDGF
Flocculus	5/301	0.968326	0.999996	0	0	0.501416	0.0161388	BTG1;ITGB2;ATN1;TBX3;ZFP36L1
Folium-tuber vermis (VII)	5/301	0.968326	0.999996	0	0	0.501416	0.0161388	CADM3;BTG1;PTPRZ1;VIM;TBX3
Folium-tuber vermis (VII), granular layer	5/301	0.968326	0.999996	0	0	0.501416	0.0161388	CADM3;BTG1;PTPRZ1;VIM;TBX3
Folium-tuber vermis (VII), molecular layer	5/301	0.968326	0.999996	0	0	0.501416	0.0161388	CADM3;BTG1;PTPRZ1;VIM;TBX3
Gustatory areas, layer 1	5/301	0.968326	0.999996	0	0	0.501416	0.0161388	CNOT1;HNRNPF;ENPP2;B2M;YWHAZ
Intermediate reticular nucleus	5/301	0.968326	0.999996	0	0	0.501416	0.0161388	YARS;TAGLN2;AGRN;EIF4B;PHOX2A
Isocortex	5/301	0.968326	0.999996	0	0	0.501416	0.0161388	ENC1;INSM2;KIF21B;HMGCR;DUSP6
Lobule II, granular layer	5/301	0.968326	0.999996	0	0	0.501416	0.0161388	BTG1;PTPRZ1;DBI;VIM;SNRNP200
Lobule III, granular layer	5/301	0.968326	0.999996	0	0	0.501416	0.0161388	BTG1;PTPRZ1;VIM;SEPT2;TBX3
Mammillary body	5/301	0.968326	0.999996	0	0	0.501416	0.0161388	RPL12;IGF2;S100A6;RPL37;TIMP1
Medial amygdalar nucleus, anteroventral part	5/301	0.968326	0.999996	0	0	0.501416	0.0161388	MARCKSL1;TRIM28;LRBA;LAPTM5;TRIB3
Midbrain, sensory related	5/301	0.968326	0.999996	0	0	0.501416	0.0161388	AHNAK;S100A6;UBA1;SMC4;SMARCA4
Nucleus of the lateral lemniscus, horizontal part	5/301	0.968326	0.999996	0	0	0.501416	0.0161388	SYT4;IL1RN;AHNAK;IGFBP3;PLIN2
Orbital area	5/301	0.968326	0.999996	0	0	0.501416	0.0161388	IL1RN;FCER1G;CRABP1;S100A6;NEUROG2
Orbital area, ventrolateral part, layer 1	5/301	0.968326	0.999996	0	0	0.501416	0.0161388	IL1RN;GDF15;CRABP1;SOX4;NEUROG2
Paraflocculus, granular layer	5/301	0.968326	0.999996	0	0	0.501416	0.0161388	BTG1;SPRY4;LCP1;ZMPSTE24;ZFP36L1
Paraflocculus, molecular layer	5/301	0.968326	0.999996	0	0	0.501416	0.0161388	BTG1;SPRY4;ATN1;LCP1;ZFP36L1
Paragigantocellular reticular nucleus, dorsal part	5/301	0.968326	0.999996	0	0	0.501416	0.0161388	YARS;SYT4;MAB21L2;SPP1;PBX1
Parapyramidal nucleus	5/301	0.968326	0.999996	0	0	0.501416	0.0161388	NRG4;LRBA;HNRNPA2B1;RPS13;PBX1
Parasubiculum, layer 1	5/301	0.968326	0.999996	0	0	0.501416	0.0161388	AHNAK;GDF15;IGF2;B2M;DDR2
Piriform area	5/301	0.968326	0.999996	0	0	0.501416	0.0161388	ACTR2;TYROBP;PTN;HMGCR;PRPH
Piriform-amygdalar area, pyramidal layer	5/301	0.968326	0.999996	0	0	0.501416	0.0161388	MARCKSL1;TYROBP;SHMT2;PKIA;PRPH
Pons	5/301	0.968326	0.999996	0	0	0.501416	0.0161388	SLC10A4;YARS;SPP1;GATA3;HSPG2
Pontine gray	5/301	0.968326	0.999996	0	0	0.501416	0.0161388	AHNAK;MAB21L2;SPP1;TARS;TIMP1
Posterior parietal association areas, layer 1	5/301	0.968326	0.999996	0	0	0.501416	0.0161388	CDKN1A;ENC1;EIF4EBP1;UBA1;DUSP6
Posterior pretectal nucleus	5/301	0.968326	0.999996	0	0	0.501416	0.0161388	RSL1D1;SPRY4;RPL27;PROX1;PRRC2A
Postpiriform transition area	5/301	0.968326	0.999996	0	0	0.501416	0.0161388	LARP1;RPS7;CNOT1;PLAUR;ILF2
Postpiriform transition area, layers 1	5/301	0.968326	0.999996	0	0	0.501416	0.0161388	RPS7;PKIA;NR2F1;PLAUR;FDFT1
Postsubiculum	5/301	0.968326	0.999996	0	0	0.501416	0.0161388	GDF15;STC2;S100A6;UBA1;GATA3
Postsubiculum, layer 1	5/301	0.968326	0.999996	0	0	0.501416	0.0161388	FCER1G;GDF15;STC2;S100A6;UBA1
Prelimbic area, layer 2	5/301	0.968326	0.999996	0	0	0.501416	0.0161388	SLC7A5;IL1RN;SURF4;PPT1;WAC
Prelimbic area, layer 5	5/301	0.968326	0.999996	0	0	0.501416	0.0161388	IL1RN;YWHAB;SURF4;PPT1;SLC7A1
Presubiculum, layer 3	5/301	0.968326	0.999996	0	0	0.501416	0.0161388	CAP1;TMEFF1;TCF4;GATA3;PRPH
Primary somatosensory area, lower limb, layer 1	5/301	0.968326	0.999996	0	0	0.501416	0.0161388	TRIM28;FOXG1;ENC1;EIF4EBP1;CDK5R1
Primary somatosensory area, nose, layer 6b	5/301	0.968326	0.999996	0	0	0.501416	0.0161388	ACTR2;LARP1;TYROBP;PLAUR;ACTN4
Primary somatosensory area, unassigned, layer 5	5/301	0.968326	0.999996	0	0	0.501416	0.0161388	LASP1;LARP1;TYROBP;INSM2;PTN
Primary somatosensory area, unassigned, layer 6a	5/301	0.968326	0.999996	0	0	0.501416	0.0161388	TMEFF1;ACAP3;LASP1;HDLBP;ARHGEF2
Primary somatosensory area, upper limb, layer 4	5/301	0.968326	0.999996	0	0	0.501416	0.0161388	LARP1;ENPP2;TNRC18;HLA-A;PTN
Primary somatosensory area, upper limb, layer 5	5/301	0.968326	0.999996	0	0	0.501416	0.0161388	LASP1;LRP1;INSM2;PTN;B2M
Primary visual area, layer 2/3	5/301	0.968326	0.999996	0	0	0.501416	0.0161388	CDK6;TNRC18;INSM2;DUSP6;MCL1
Somatomotor areas	5/301	0.968326	0.999996	0	0	0.501416	0.0161388	TMEFF1;ACAP3;TYROBP;SH3BGRL3;INSM2
Superior colliculus, motor related, deep white layer	5/301	0.968326	0.999996	0	0	0.501416	0.0161388	UNC5B;PRKDC;SNCG;AGRN;DDR2
Superior olivary complex, medial part	5/301	0.968326	0.999996	0	0	0.501416	0.0161388	LGALS1;PABPC4;RPL12;TARS;PHOX2A
Superior olivary complex, periolivary region	5/301	0.968326	0.999996	0	0	0.501416	0.0161388	NRG4;SPP1;TRIB3;HLA-A;RPS13
Taenia tecta, ventral part	5/301	0.968326	0.999996	0	0	0.501416	0.0161388	FCER1G;GDF15;KIF26A;FTH1;NEUROG2
Taenia tecta, ventral part, layer 1	5/301	0.968326	0.999996	0	0	0.501416	0.0161388	FCER1G;GDF15;KIF26A;FTH1;NEUROG2
Taenia tecta, ventral part, layer 2	5/301	0.968326	0.999996	0	0	0.501416	0.0161388	TMEFF1;GDF15;KIF26A;FTH1;SURF4
Temporal association areas, layer 5	5/301	0.968326	0.999996	0	0	0.501416	0.0161388	LARP1;SSR2;PLAUR;PLIN2;RPS27A
Temporal association areas, layer 6b	5/301	0.968326	0.999996	0	0	0.501416	0.0161388	DNAJA1;RBM39;PLAUR;STMN4;HNRNPC
Uvula (IX)	5/301	0.968326	0.999996	0	0	0.501416	0.0161388	BTG1;PTPRZ1;PLIN2;VIM;TBX3
Uvula (IX), granular layer	5/301	0.968326	0.999996	0	0	0.501416	0.0161388	BTG1;PTPRZ1;PLIN2;VIM;TBX3
Ventral anterior-lateral complex of the thalamus	5/301	0.968326	0.999996	0	0	0.501416	0.0161388	IL1B;RGS16;NR2F1;PROX1;L1CAM
Ventral posterolateral nucleus of the thalamus, parvicellular part	5/301	0.968326	0.999996	0	0	0.501416	0.0161388	YWHAQ;IL1B;RGS16;UNC5C;ATP5G3
alar plate of evaginated telencephalic vesicle	5/301	0.968326	0.999996	0	0	0.501416	0.0161388	ACTN1;ENC1;CDC42EP3;DCX;DUSP6
alar plate of p3 (alar prethalamus)	5/301	0.968326	0.999996	0	0	0.501416	0.0161388	RAB31;TTR;RGS16;NR2F1;ID4
anterior olfactory area, dorsal part	5/301	0.968326	0.999996	0	0	0.501416	0.0161388	IL1RN;GDF15;KIF26A;DCX;SOX11
anterior pretectal nucleus, ventral superficial part	5/301	0.968326	0.999996	0	0	0.501416	0.0161388	SPARC;PKIA;RGS16;ITGB2;IGF2
basointermediate isthmic reticular formation	5/301	0.968326	0.999996	0	0	0.501416	0.0161388	SLC10A4;FTH1;RPL12;PNOC;SNCG
basolateral amygdaloid nucleus, ventral part	5/301	0.968326	0.999996	0	0	0.501416	0.0161388	DNAJA1;CNOT1;PLAUR;LCP1;AP2M1
caudal secondary prosencephalon	5/301	0.968326	0.999996	0	0	0.501416	0.0161388	ACTN1;ENC1;CDC42EP3;DCX;DUSP6
central layers of TG	5/301	0.968326	0.999996	0	0	0.501416	0.0161388	TRIM28;RPL27;PROX1;P4HB;DDR2
dorsal spiriform nucleus	5/301	0.968326	0.999996	0	0	0.501416	0.0161388	FADS2;CHRNA3;SDC2;FABP7;PRDX6
dorsolateral part of Lat	5/301	0.968326	0.999996	0	0	0.501416	0.0161388	RBM39;CADM3;BTG1;RBMX;ZFP36L1
dorsolateral part of Med	5/301	0.968326	0.999996	0	0	0.501416	0.0161388	BTG1;SOX11;S100A4;PBX1;NEUROG2
dorsolateral preisthmic part of periaqueductal gray	5/301	0.968326	0.999996	0	0	0.501416	0.0161388	FADS2;RPS18;SNCG;EBF3;PHOX2A
external part of AOV	5/301	0.968326	0.999996	0	0	0.501416	0.0161388	IL1RN;KIF26A;DCX;GATA2;SOX4
horizontal nucleus of the diagonal band	5/301	0.968326	0.999996	0	0	0.501416	0.0161388	PABPC4;IGF2;TIMP1;FOXM1;RPS13
intermediate stratum of 5BL	5/301	0.968326	0.999996	0	0	0.501416	0.0161388	RPL12;SPP1;TARS;MMP9;PHOX2A
intermediate stratum of AOB	5/301	0.968326	0.999996	0	0	0.501416	0.0161388	IL1RN;KIF26A;IL1B;DCX;SOX4
intermediate stratum of AStr	5/301	0.968326	0.999996	0	0	0.501416	0.0161388	TTR;ILF2;XPR1;WLS;PRPH
intermediate stratum of CoPL	5/301	0.968326	0.999996	0	0	0.501416	0.0161388	CHRNA3;LAPTM5;RPL24;RPL27;YWHAG
intermediate stratum of CoPV	5/301	0.968326	0.999996	0	0	0.501416	0.0161388	YARS;UNC5B;STXBP1;HNRNPA2B1;ATP5G3
intermediate stratum of PO2	5/301	0.968326	0.999996	0	0	0.501416	0.0161388	VAT1;SLC10A4;PEG10;STMN3;RPS13
intermediate stratum of TG	5/301	0.968326	0.999996	0	0	0.501416	0.0161388	TRIM28;RPL27;PROX1;P4HB;DDR2
intermediate stratum of isBI	5/301	0.968326	0.999996	0	0	0.501416	0.0161388	SLC10A4;FTH1;RPL12;PNOC;SNCG
intermediate stratum of isLim	5/301	0.968326	0.999996	0	0	0.501416	0.0161388	SHMT2;IGF2;RPS20;TIMP1;DDR2
intermediate stratum of m1B	5/301	0.968326	0.999996	0	0	0.501416	0.0161388	SLC10A4;RET;ACLY;SPP1;SNCG
intermediate stratum of m1Lim	5/301	0.968326	0.999996	0	0	0.501416	0.0161388	AHNAK;ITGB2;IGF2;YWHAZ;DDR2
intermediate stratum of r10Tr	5/301	0.968326	0.999996	0	0	0.501416	0.0161388	APC2;HMGA1;SLC38A2;YWHAZ;PHOX2A
intermediate stratum of r2Lim	5/301	0.968326	0.999996	0	0	0.501416	0.0161388	SLC10A4;YARS;LRBA;MSN;LCP1
intermediate stratum of r5Ve	5/301	0.968326	0.999996	0	0	0.501416	0.0161388	YARS;LRBA;SOX11;SEPT2;PHOX2A
intermediate stratum of r8Ve	5/301	0.968326	0.999996	0	0	0.501416	0.0161388	AHNAK;SHMT2;IGFBP3;EBF3;YWHAZ
intermediate stratum of r9Ve	5/301	0.968326	0.999996	0	0	0.501416	0.0161388	AHNAK;IL1B;IGFBP3;EBF3;UBA1
isthmic part of the intermediate lateral lemniscal nucleus	5/301	0.968326	0.999996	0	0	0.501416	0.0161388	SYT4;IL1RN;AHNAK;RPS20;EMILIN1
isthmic vestibulocerebellar nucleus	5/301	0.968326	0.999996	0	0	0.501416	0.0161388	PRDX1;SPRY4;DBI;B2M;WLS
lateral (dentate) cerebellar nucleus	5/301	0.968326	0.999996	0	0	0.501416	0.0161388	RBM39;CCL20;ITGB2;DBI;ZFP36L1
lateral part of Med	5/301	0.968326	0.999996	0	0	0.501416	0.0161388	BTG1;SHMT2;SPRY4;SOX11;PBX1
lateral part of r2B	5/301	0.968326	0.999996	0	0	0.501416	0.0161388	SLC10A4;YARS;AHNAK;SPP1;DDX21
lateral preoptic nucleus, PO2 part	5/301	0.968326	0.999996	0	0	0.501416	0.0161388	VAT1;SLC10A4;PEG10;STMN3;RPS13
lateral septal nucleus, intermedio-dorsal part	5/301	0.968326	0.999996	0	0	0.501416	0.0161388	SOX2;SYT4;ALCAM;PNOC;XPR1
lateral trapezoid nucleus	5/301	0.968326	0.999996	0	0	0.501416	0.0161388	SLC38A1;YWHAQ;HSPG2;PHOX2A;HIST1H1C
lateropallial prepiriform area	5/301	0.968326	0.999996	0	0	0.501416	0.0161388	ACTR2;TYROBP;GNG2;ISLR2;PTN
layer 1 of AOD cortex	5/301	0.968326	0.999996	0	0	0.501416	0.0161388	IL1RN;GDF15;KIF26A;LAPTM5;SOX11
layer 1 of AOV cortex	5/301	0.968326	0.999996	0	0	0.501416	0.0161388	IL1RN;KIF26A;DCX;NEUROG2;DDR2
layer 1 of FCx	5/301	0.968326	0.999996	0	0	0.501416	0.0161388	IL1RN;KIF26A;SHC1;LAPTM5;NEUROG2
layer 1 of LOT	5/301	0.968326	0.999996	0	0	0.501416	0.0161388	ACAP3;MARCKSL1;LRBA;TRIB3;SCG2
layer 1 of OCx	5/301	0.968326	0.999996	0	0	0.501416	0.0161388	TRIM28;ENC1;TNRC18;DUSP6;SMARCA4
layer 1 of PCx	5/301	0.968326	0.999996	0	0	0.501416	0.0161388	TRIM28;ENC1;EIF4EBP1;SMC4;DUSP6
layer 2 of RSC	5/301	0.968326	0.999996	0	0	0.501416	0.0161388	STMN4;PLIN2;INSM2;HMGCR;CCT7
layer 3 of AOD cortex	5/301	0.968326	0.999996	0	0	0.501416	0.0161388	TOP2A;IL1RN;DCX;PTN;SOX4
layer 3 of CCx	5/301	0.968326	0.999996	0	0	0.501416	0.0161388	PLXNA1;TNRC18;HMGCR;SMC4;DUSP6
layer 4 of RSC	5/301	0.968326	0.999996	0	0	0.501416	0.0161388	CTNNB1;STMN4;INSM2;SLC1A5;HMGCR
layer 5 of CCx	5/301	0.968326	0.999996	0	0	0.501416	0.0161388	TMEFF1;PPT1;SLC3A2;SLC7A1;SEPT3
layer 5 of RSC	5/301	0.968326	0.999996	0	0	0.501416	0.0161388	YWHAB;HDLBP;CTNNB1;INSM2;SLC1A5
layer 6 of ERCx	5/301	0.968326	0.999996	0	0	0.501416	0.0161388	DNAJA1;CDH2;PLIN2;LCP1;FDFT1
layer 6 of PrS	5/301	0.968326	0.999996	0	0	0.501416	0.0161388	TMEFF1;SPRY4;UNC5C;TCF4;SLIT3
layer 6a of PrS	5/301	0.968326	0.999996	0	0	0.501416	0.0161388	TMEFF1;SPRY4;UNC5C;TCF4;SLIT3
liminal alar domain of m1	5/301	0.968326	0.999996	0	0	0.501416	0.0161388	PEG10;SNCG;EBF3;MAPT;PRDX6
liminal part of alar p2	5/301	0.968326	0.999996	0	0	0.501416	0.0161388	RAB3C;RIMS3;RGS16;RPL24;LSS
m1Lim part of the midbrain reticular formation	5/301	0.968326	0.999996	0	0	0.501416	0.0161388	AHNAK;ITGB2;IGF2;YWHAZ;DDR2
mantle zone of AOD	5/301	0.968326	0.999996	0	0	0.501416	0.0161388	IL1RN;GDF15;KIF26A;DCX;SOX11
mantle zone of APal	5/301	0.968326	0.999996	0	0	0.501416	0.0161388	CD63;TTR;DBI;LSS;PRPH
mantle zone of JcPV	5/301	0.968326	0.999996	0	0	0.501416	0.0161388	RBM39;UNC5B;MRFAP1;ATP5G3;PRDX6
mantle zone of LAP	5/301	0.968326	0.999996	0	0	0.501416	0.0161388	MARCKSL1;CNOT1;NR2F1;LCP1;PRPH
mantle zone of S	5/301	0.968326	0.999996	0	0	0.501416	0.0161388	TMEFF1;XPOT;YWHAB;APEX1;SLIT3
mantle zone of TSPaA	5/301	0.968326	0.999996	0	0	0.501416	0.0161388	GAL;PEG10;CRABP1;TARS;GNAI2
mantle zone of VAP	5/301	0.968326	0.999996	0	0	0.501416	0.0161388	MARCKSL1;CNOT1;PKIA;NR2F1;HDGF
mantle zone of VPrP	5/301	0.968326	0.999996	0	0	0.501416	0.0161388	ACTR2;TYROBP;ARHGDIA;PTN;HMGCR
mantle zone of VTTh	5/301	0.968326	0.999996	0	0	0.501416	0.0161388	RIMS3;RGS16;IGF2;PROX1;LSS
mantle zone of m1Lim	5/301	0.968326	0.999996	0	0	0.501416	0.0161388	PEG10;SNCG;EBF3;MAPT;PRDX6
mantle zone of p3ZL	5/301	0.968326	0.999996	0	0	0.501416	0.0161388	RAB31;RGS16;NR2F1;UNC5C;LSS
mantle zone of r10BM	5/301	0.968326	0.999996	0	0	0.501416	0.0161388	TOP2A;LGALS1;TRIM28;TRIB3;MKI67
mantle zone of r11Tr	5/301	0.968326	0.999996	0	0	0.501416	0.0161388	ACAP3;MMP14;TNRC18;SLC7A1;ATP9A
mantle zone of r1Ve	5/301	0.968326	0.999996	0	0	0.501416	0.0161388	LGALS1;TTR;SPP1;NEUROG2;WLS
mantle zone of r2BL	5/301	0.968326	0.999996	0	0	0.501416	0.0161388	SLC10A4;YARS;AHNAK;SPP1;DDX21
mantle zone of r2BM	5/301	0.968326	0.999996	0	0	0.501416	0.0161388	SLC10A4;YARS;RGS5;KIF26A;SPP1
mantle zone of r8Ve	5/301	0.968326	0.999996	0	0	0.501416	0.0161388	AHNAK;IGFBP3;EBF3;YWHAZ;PHOX2A
mantle zone of r9BM	5/301	0.968326	0.999996	0	0	0.501416	0.0161388	TOP2A;LGALS1;GAL;SNCG;MKI67
mantle zone of the Fc	5/301	0.968326	0.999996	0	0	0.501416	0.0161388	MMP14;STC2;IL1B;ITGB2;LSS
medial part of r10B	5/301	0.968326	0.999996	0	0	0.501416	0.0161388	TOP2A;LGALS1;TRIM28;TRIB3;MKI67
medial part of r2B	5/301	0.968326	0.999996	0	0	0.501416	0.0161388	SLC10A4;YARS;RGS5;KIF26A;SPP1
medial part of r9B	5/301	0.968326	0.999996	0	0	0.501416	0.0161388	TOP2A;LGALS1;GAL;SNCG;MKI67
medial trapezoid nucleus	5/301	0.968326	0.999996	0	0	0.501416	0.0161388	TMEFF1;FCER1G;YWHAQ;TRIB3;HSPG2
medial tuberal nucleus	5/301	0.968326	0.999996	0	0	0.501416	0.0161388	VAT1;TRIM28;PABPC4;RPL12;FOXM1
microcellular tegmental nucleus	5/301	0.968326	0.999996	0	0	0.501416	0.0161388	MMP14;GRN;ITGB2;IGF2;DDR2
molecular layer of S	5/301	0.968326	0.999996	0	0	0.501416	0.0161388	TMEFF1;FOXG1;APEX1;RPL22;SLIT3
p2 part of the zona limitans core population	5/301	0.968326	0.999996	0	0	0.501416	0.0161388	RAB3C;RAB31;IL1B;RGS16;L1CAM
p2 portion of the substantia nigra pars reticulata	5/301	0.968326	0.999996	0	0	0.501416	0.0161388	SLC10A4;AHNAK;PABPC4;IGF2;LAPTM5
pallidal amygdala	5/301	0.968326	0.999996	0	0	0.501416	0.0161388	CD63;TTR;DBI;LSS;PRPH
parvicellular part of Lat	5/301	0.968326	0.999996	0	0	0.501416	0.0161388	TTR;CCL20;ITGB2;DBI;PBX1
periventricular stratum of m2ADL	5/301	0.968326	0.999996	0	0	0.501416	0.0161388	FADS2;RPS18;SNCG;EBF3;PHOX2A
periventricular stratum of r2Co	5/301	0.968326	0.999996	0	0	0.501416	0.0161388	MMP14;BTG1;IGFBP2;MKI67;ZFP36L1
periventricular stratum of r4Lim	5/301	0.968326	0.999996	0	0	0.501416	0.0161388	VAT1;PRKDC;IGFBP2;DDX21;PHOX2A
periventricular stratum of r5Tr	5/301	0.968326	0.999996	0	0	0.501416	0.0161388	RGS5;SYT4;CEBPG;MAB21L2;WHSC1
periventricular stratum of r6Ve	5/301	0.968326	0.999996	0	0	0.501416	0.0161388	RGS5;PRKDC;ZNF704;ITGB2;PHOX2A
periventricular stratum of r7Tr	5/301	0.968326	0.999996	0	0	0.501416	0.0161388	ACLY;SYT4;ZNF704;MAB21L2;PHOX2A
periventricular stratum of r7Ve	5/301	0.968326	0.999996	0	0	0.501416	0.0161388	RGS5;PRKDC;ZNF704;ITGB2;PHOX2A
periventricular stratum of r8Ve	5/301	0.968326	0.999996	0	0	0.501416	0.0161388	IGFBP3;S100A6;PLIN2;YWHAZ;PHOX2A
plexiform layer of TuStr	5/301	0.968326	0.999996	0	0	0.501416	0.0161388	CDC42EP3;ID4;TNRC18;YBX1;RPS13
posterior part of Int	5/301	0.968326	0.999996	0	0	0.501416	0.0161388	SHMT2;ITGB2;SPRY4;DBI;PBX1
prepontine hindbrain	5/301	0.968326	0.999996	0	0	0.501416	0.0161388	CADM3;BTG1;PTPRZ1;VIM;ZFP36L1
pterigoid muscle trigeminal motor cell group	5/301	0.968326	0.999996	0	0	0.501416	0.0161388	SLC10A4;ACLY;LGALS1;MSN;MVD
pyramidal layer of taenia tecta	5/301	0.968326	0.999996	0	0	0.501416	0.0161388	FCER1G;GDF15;S100A4;NEUROG2;DDR2
r1 part of vestibular sensory column	5/301	0.968326	0.999996	0	0	0.501416	0.0161388	LGALS1;TTR;SPP1;NEUROG2;WLS
r1 part of vestibulocerebellar nucleus	5/301	0.968326	0.999996	0	0	0.501416	0.0161388	SHMT2;HNRNPA2B1;ITGB2;DBI;WLS
r10 part of dorsal parvicellular reticular formation	5/301	0.968326	0.999996	0	0	0.501416	0.0161388	APC2;HMGA1;SLC38A2;YWHAZ;PHOX2A
r11 part of spinal trigeminal nucleus, caudal part	5/301	0.968326	0.999996	0	0	0.501416	0.0161388	ACAP3;MMP14;TNRC18;SLC7A1;ATP9A
r11 part of the trigeminal column	5/301	0.968326	0.999996	0	0	0.501416	0.0161388	ACAP3;MMP14;TNRC18;SLC7A1;ATP9A
r2 basal plate	5/301	0.968326	0.999996	0	0	0.501416	0.0161388	SLC10A4;YARS;AHNAK;KIF26A;SPP1
r2 part of basomedial reticular formation	5/301	0.968326	0.999996	0	0	0.501416	0.0161388	SLC10A4;YARS;SLC7A5;SPP1;AP2M1
r2 part of dorsal cochlear nucleus	5/301	0.968326	0.999996	0	0	0.501416	0.0161388	MMP14;BTG1;IGFBP2;MKI67;ZFP36L1
r2 part of principal trigeminal sensory nucleus	5/301	0.968326	0.999996	0	0	0.501416	0.0161388	CCL20;CFL1;MAB21L2;SPP1;LSS
r2 part of the trigeminal motor nucleus	5/301	0.968326	0.999996	0	0	0.501416	0.0161388	SLC10A4;ACLY;LGALS1;MSN;AP2M1
r2 part of the ventral parvicellular reticular formation	5/301	0.968326	0.999996	0	0	0.501416	0.0161388	SLC10A4;YARS;LRBA;MSN;LCP1
r3 part of reticulotegmental nucleus, shell portion	5/301	0.968326	0.999996	0	0	0.501416	0.0161388	APC2;MAB21L2;SPP1;HMGA1;YWHAZ
r4 liminal central gray	5/301	0.968326	0.999996	0	0	0.501416	0.0161388	VAT1;PRKDC;IGFBP2;DDX21;PHOX2A
r4 part of ventral lateral lemniscal nucleus	5/301	0.968326	0.999996	0	0	0.501416	0.0161388	NRG4;LRBA;SPP1;TRIB3;RPL37
r5 part of basolateral reticular formation	5/301	0.968326	0.999996	0	0	0.501416	0.0161388	RPL12;SPP1;TARS;MMP9;PHOX2A
r5 part of magnocellular medial vestibular nucleus	5/301	0.968326	0.999996	0	0	0.501416	0.0161388	YARS;LRBA;SOX11;SEPT2;PHOX2A
r5 part of posteroventral cochlear nucleus	5/301	0.968326	0.999996	0	0	0.501416	0.0161388	IGFBP3;IGF2;RPL27;PLIN2;ARHGEF2
r5 part of ventral lateral lemniscal nucleus	5/301	0.968326	0.999996	0	0	0.501416	0.0161388	NRG4;SPP1;TRIB3;ND3;RPS13
r6 part of paragigantocellular nucleus	5/301	0.968326	0.999996	0	0	0.501416	0.0161388	SYT4;GDF15;IL1B;SNCG;MKI67
r6 part of parvocellular medial vestibular nucleus	5/301	0.968326	0.999996	0	0	0.501416	0.0161388	RGS5;PRKDC;ZNF704;ITGB2;PHOX2A
r6 part of spinal trigeminal nucleus, pars oralis	5/301	0.968326	0.999996	0	0	0.501416	0.0161388	RPL18A;APEX1;HNRNPA2B1;LAPTM5;FGFBP3
r7 (gustatory) part of solitary complex	5/301	0.968326	0.999996	0	0	0.501416	0.0161388	ACLY;SYT4;ZNF704;MAB21L2;PHOX2A
r7 part of parvocellular medial vestibular nucleus	5/301	0.968326	0.999996	0	0	0.501416	0.0161388	RGS5;PRKDC;ZNF704;ITGB2;PHOX2A
r7 part of trigeminal transition zone	5/301	0.968326	0.999996	0	0	0.501416	0.0161388	LGALS1;CAPRIN1;TAGLN2;LSS;EIF4B
r8 part of linear nucleus	5/301	0.968326	0.999996	0	0	0.501416	0.0161388	TOP2A;STC2;CAPRIN1;HLA-A;EIF4B
r8 part of parvocellular medial vestibular nucleus	5/301	0.968326	0.999996	0	0	0.501416	0.0161388	IGFBP3;S100A6;PLIN2;YWHAZ;PHOX2A
r8 part of spinal vestibular nucleus	5/301	0.968326	0.999996	0	0	0.501416	0.0161388	AHNAK;SHMT2;IGFBP3;EBF3;YWHAZ
r8 part of the vestibular column	5/301	0.968326	0.999996	0	0	0.501416	0.0161388	AHNAK;IGFBP3;EBF3;YWHAZ;PHOX2A
r8 portion of ambiguous motor nucleus	5/301	0.968326	0.999996	0	0	0.501416	0.0161388	TOP2A;LGALS1;UNC5B;EIF4B;IER3
r9 part of dorsal parvicellular reticular formation	5/301	0.968326	0.999996	0	0	0.501416	0.0161388	RPL37A;HMGA1;MVD;YWHAZ;PHOX2A
r9 part of paragigantocellular nucleus	5/301	0.968326	0.999996	0	0	0.501416	0.0161388	TOP2A;TRIM28;UNC5B;IGFBP3;MKI67
r9 part of spinal vestibular nucleus	5/301	0.968326	0.999996	0	0	0.501416	0.0161388	AHNAK;IL1B;IGFBP3;EBF3;UBA1
red nucleus, magnocellular part	5/301	0.968326	0.999996	0	0	0.501416	0.0161388	SLC10A4;RET;YWHAQ;CEBPG;SNCG
reticular formation of CoPD	5/301	0.968326	0.999996	0	0	0.501416	0.0161388	RSL1D1;RPL18A;LAPTM5;CTNNB1;PROX1
rhombomere 1	5/301	0.968326	0.999996	0	0	0.501416	0.0161388	CADM3;BTG1;PTPRZ1;VIM;ZFP36L1
rhombomere 11	5/301	0.968326	0.999996	0	0	0.501416	0.0161388	TOP2A;HNRNPA2B1;TRIB3;TIMP1;SLC7A1
secondary prosencephalon	5/301	0.968326	0.999996	0	0	0.501416	0.0161388	ACTN1;ENC1;CDC42EP3;DCX;DUSP6
septopallidal shell area	5/301	0.968326	0.999996	0	0	0.501416	0.0161388	ALCAM;TSC22D1;ACTN1;CDC42EP3;PHLDA1
subcuneiform nucleus	5/301	0.968326	0.999996	0	0	0.501416	0.0161388	AHNAK;PSAT1;RPS20;EMILIN1;YWHAZ
submammillothalamic nucleus	5/301	0.968326	0.999996	0	0	0.501416	0.0161388	IL1RN;FCER1G;IGF2;S100A6;FOXM1
superficial gray layer of SC	5/301	0.968326	0.999996	0	0	0.501416	0.0161388	GDF15;S100A6;SMC4;NEUROG2;SMARCA4
superficial layers of TG	5/301	0.968326	0.999996	0	0	0.501416	0.0161388	MMP14;AHNAK;GDF15;RPL27;PROX1
superficial stratum of AOD	5/301	0.968326	0.999996	0	0	0.501416	0.0161388	IL1RN;GDF15;KIF26A;DCX;SOX11
superficial stratum of PO2	5/301	0.968326	0.999996	0	0	0.501416	0.0161388	GAL;PEG10;RGS16;UBA1;SCG2
superficial stratum of PcPV	5/301	0.968326	0.999996	0	0	0.501416	0.0161388	SPARC;PKIA;RGS16;ITGB2;IGF2
superficial stratum of SC	5/301	0.968326	0.999996	0	0	0.501416	0.0161388	GDF15;S100A6;SMC4;NEUROG2;SMARCA4
superficial stratum of TG	5/301	0.968326	0.999996	0	0	0.501416	0.0161388	MMP14;AHNAK;GDF15;RPL27;PROX1
superficial stratum of THyB-I	5/301	0.968326	0.999996	0	0	0.501416	0.0161388	VAT1;TRIM28;PABPC4;RPL12;FOXM1
superficial stratum of TTe	5/301	0.968326	0.999996	0	0	0.501416	0.0161388	FCER1G;GDF15;S100A4;NEUROG2;DDR2
superficial stratum of VPrP	5/301	0.968326	0.999996	0	0	0.501416	0.0161388	ACTR2;TYROBP;PTN;HMGCR;AP2M1
superficial stratum of m1AL	5/301	0.968326	0.999996	0	0	0.501416	0.0161388	GRN;SPARC;EIF3L;ITGB2;YWHAZ
superficial stratum of p3B	5/301	0.968326	0.999996	0	0	0.501416	0.0161388	SLC10A4;MMP14;STC2;PABPC4;IGF2
superficial stratum of r11Tr	5/301	0.968326	0.999996	0	0	0.501416	0.0161388	ACAP3;MMP14;TNRC18;SLC7A1;ATP9A
superficial stratum of r2Lim	5/301	0.968326	0.999996	0	0	0.501416	0.0161388	SLC10A4;ACLY;LGALS1;MSN;AP2M1
superficial stratum of r2Tr	5/301	0.968326	0.999996	0	0	0.501416	0.0161388	CCL20;CFL1;MAB21L2;SPP1;LSS
superficial stratum of r5BI	5/301	0.968326	0.999996	0	0	0.501416	0.0161388	SLC38A1;YWHAQ;HSPG2;PHOX2A;HIST1H1C
superficial stratum of r5BM	5/301	0.968326	0.999996	0	0	0.501416	0.0161388	TMEFF1;FCER1G;YWHAQ;TRIB3;HSPG2
superficial stratum of r5Co	5/301	0.968326	0.999996	0	0	0.501416	0.0161388	IGFBP3;IGF2;RPL27;PLIN2;ARHGEF2
superficial stratum of r6Tr	5/301	0.968326	0.999996	0	0	0.501416	0.0161388	RPL18A;APEX1;HNRNPA2B1;LAPTM5;FGFBP3
superficial stratum of r8BL	5/301	0.968326	0.999996	0	0	0.501416	0.0161388	TOP2A;TRIM28;TSC22D1;NRG4;EIF4B
superficial stratum of r8Lim	5/301	0.968326	0.999996	0	0	0.501416	0.0161388	TOP2A;LGALS1;UNC5B;EIF4B;IER3
superficial stratum of r9BI	5/301	0.968326	0.999996	0	0	0.501416	0.0161388	TOP2A;TRIM28;UNC5B;IGFBP3;MKI67
superficial stratum of the Fc	5/301	0.968326	0.999996	0	0	0.501416	0.0161388	MMP14;STC2;IL1B;ITGB2;LSS
supragenual nucleus	5/301	0.968326	0.999996	0	0	0.501416	0.0161388	RGS5;SYT4;KIF26A;STC2;MAB21L2
telencephalic vesicle	5/301	0.968326	0.999996	0	0	0.501416	0.0161388	ACTN1;ENC1;CDC42EP3;DCX;DUSP6
terminal hypothalamus (rostral hypothalamus)	5/301	0.968326	0.999996	0	0	0.501416	0.0161388	GAL;TRIM28;PEG10;SDC2;CRABP1
terminal subparaventricular area of THyA	5/301	0.968326	0.999996	0	0	0.501416	0.0161388	GAL;PEG10;CRABP1;TARS;GNAI2
ventral lateral nucleus	5/301	0.968326	0.999996	0	0	0.501416	0.0161388	RIMS3;RGS16;NR2F1;PROX1;L1CAM
ventral part of JcP	5/301	0.968326	0.999996	0	0	0.501416	0.0161388	RBM39;UNC5B;MRFAP1;ATP5G3;PRDX6
ventral posteromedial nucleus	5/301	0.968326	0.999996	0	0	0.501416	0.0161388	IL1B;RGS16;NR2F1;MYO5A;L1CAM
ventral tier of thalamus	5/301	0.968326	0.999996	0	0	0.501416	0.0161388	RIMS3;RGS16;IGF2;PROX1;LSS
ventrolateral part of alar m1	5/301	0.968326	0.999996	0	0	0.501416	0.0161388	PEG10;SNCG;EBF3;MAPT;PRDX6
ventropallial amygdalopiriform area	5/301	0.968326	0.999996	0	0	0.501416	0.0161388	MARCKSL1;CNOT1;PKIA;NR2F1;HDGF
ventropallial prepiriform area	5/301	0.968326	0.999996	0	0	0.501416	0.0161388	ACTR2;TYROBP;ARHGDIA;PTN;HMGCR
Induseum griseum	8/435	0.972752	0.999996	0	0	0.554907	0.0153298	MMP14;S100A4;SLC3A2;SMC4;HSPG2;DUSP6;NEUROG2;DDR2
Central amygdalar nucleus, lateral part	7/401	0.976434	0.999996	0	0	0.526305	0.0125515	TTR;RPL21;DBI;GATA3;LSS;XPR1;PRPH
Fasciola cinerea	7/435	0.988142	0.999996	0	0	0.483627	0.00576888	FADS2;MMP14;STC2;IL1B;ITGB2;MKI67;LSS
Accessory olfactory bulb, glomerular layer	4/301	0.988887	0.999996	0	0	0.399139	0.00446044	IL1RN;IL1B;WHSC1;SOX4
Agranular insular area, dorsal part, layer 1	4/301	0.988887	0.999996	0	0	0.399139	0.00446044	ACTR2;SHC1;LAPTM5;SH3BGRL3
Anterior cingulate area, dorsal part, layer 5	4/301	0.988887	0.999996	0	0	0.399139	0.00446044	DNAJA1;PPT1;SLC3A2;SLC7A1
Anterior cingulate area, ventral part, layer 2/3	4/301	0.988887	0.999996	0	0	0.399139	0.00446044	SQLE;S100A6;SLC3A2;DUSP6
Anterior olfactory nucleus, dorsal part	4/301	0.988887	0.999996	0	0	0.399139	0.00446044	IL1RN;GDF15;KIF26A;SOX11
Anterolateral visual area	4/301	0.988887	0.999996	0	0	0.399139	0.00446044	LARP1;PLAUR;HMGCR;DUSP6
Basic cell groups and regions	4/301	0.988887	0.999996	0	0	0.399139	0.00446044	FABP7;ENC1;GATA3;DUSP6
Cortical amygdalar area, posterior part, lateral zone, layer 2	4/301	0.988887	0.999996	0	0	0.399139	0.00446044	MARCKSL1;TRIM28;PKIA;PRPH
Cortical amygdalar area, posterior part, medial zone, layer 1	4/301	0.988887	0.999996	0	0	0.399139	0.00446044	MARCKSL1;SHMT2;PKIA;CDH13
Ectorhinal area/Layer 6a	4/301	0.988887	0.999996	0	0	0.399139	0.00446044	PLAUR;STMN4;PLIN2;INSM2
Entorhinal area, lateral part, layer 2b	4/301	0.988887	0.999996	0	0	0.399139	0.00446044	LARP1;APEX1;PLIN2;TBX3
Entorhinal area, lateral part, layer 3	4/301	0.988887	0.999996	0	0	0.399139	0.00446044	LARP1;CDH2;PLIN2;TBX3
Entorhinal area, medial part, dorsal zone	4/301	0.988887	0.999996	0	0	0.399139	0.00446044	TMEFF1;LARP1;CDH2;GATA3
Entorhinal area, medial part, ventral zone, layer 1	4/301	0.988887	0.999996	0	0	0.399139	0.00446044	SYT4;TRIM28;FOXG1;PKIA
Granular lamina of the cochlear nuclei	4/301	0.988887	0.999996	0	0	0.399139	0.00446044	CCL20;IGFBP2;ENPP2;WLS
Inferior colliculus, central nucleus	4/301	0.988887	0.999996	0	0	0.399139	0.00446044	AHNAK;CEBPG;PLXNA1;INSM2
Inferior salivatory nucleus	4/301	0.988887	0.999996	0	0	0.399139	0.00446044	YWHAQ;RPL37;WHSC1;AP2M1
Lobule II	4/301	0.988887	0.999996	0	0	0.399139	0.00446044	BTG1;PTPRZ1;DBI;VIM
Lobule II, molecular layer	4/301	0.988887	0.999996	0	0	0.399139	0.00446044	BTG1;PTPRZ1;DBI;VIM
Lobule III	4/301	0.988887	0.999996	0	0	0.399139	0.00446044	BTG1;PTPRZ1;VIM;SEPT2
Medial geniculate complex, medial part	4/301	0.988887	0.999996	0	0	0.399139	0.00446044	GAL;RIMS3;RGS16;GATA3
Medullary reticular nucleus, dorsal part	4/301	0.988887	0.999996	0	0	0.399139	0.00446044	UNC5B;FTH1;YWHAZ;EIF4B
Medullary reticular nucleus, ventral part	4/301	0.988887	0.999996	0	0	0.399139	0.00446044	TOP2A;LGALS1;S100A4;MKI67
Mus musculus	4/301	0.988887	0.999996	0	0	0.399139	0.00446044	BTG1;FABP7;ENC1;DUSP6
Nucleus of the lateral lemniscus, ventral part	4/301	0.988887	0.999996	0	0	0.399139	0.00446044	AHNAK;IGFBP3;DDX21;GATA3
Nucleus of the solitary tract, lateral part	4/301	0.988887	0.999996	0	0	0.399139	0.00446044	RPL37A;SOX11;MVD;PHOX2A
Nucleus of the trapezoid body	4/301	0.988887	0.999996	0	0	0.399139	0.00446044	TMEFF1;TRIB3;HSPG2;PHOX2A
Nucleus sagulum	4/301	0.988887	0.999996	0	0	0.399139	0.00446044	RBM39;AHNAK;GATA3;YWHAZ
Orbital area, lateral part	4/301	0.988887	0.999996	0	0	0.399139	0.00446044	IL1RN;IL1B;LAPTM5;NEUROG2
Pallidum, ventral region	4/301	0.988887	0.999996	0	0	0.399139	0.00446044	SLC10A4;CDC42EP3;GATA3;AP2M1
Paraflocculus	4/301	0.988887	0.999996	0	0	0.399139	0.00446044	BTG1;SPRY4;LCP1;ZFP36L1
Piriform-amygdalar area, molecular layer	4/301	0.988887	0.999996	0	0	0.399139	0.00446044	MARCKSL1;TYROBP;SHMT2;RPS13
Pons, behavioral state related	4/301	0.988887	0.999996	0	0	0.399139	0.00446044	SLC10A4;YARS;SPP1;GATA3
Pons, motor related	4/301	0.988887	0.999996	0	0	0.399139	0.00446044	YARS;KIF26A;SPP1;HMGA1
Pontine reticular nucleus, caudal part	4/301	0.988887	0.999996	0	0	0.399139	0.00446044	YARS;SPP1;AGRN;HSPG2
Postpiriform transition area, layers 3	4/301	0.988887	0.999996	0	0	0.399139	0.00446044	MARCKSL1;CNOT1;PLAUR;ILF2
Primary somatosensory area	4/301	0.988887	0.999996	0	0	0.399139	0.00446044	LARP1;LRP1;INSM2;PTN
Primary somatosensory area, barrel field, layer 2/3	4/301	0.988887	0.999996	0	0	0.399139	0.00446044	RGS4;LARP1;TNRC18;TBX3
Primary somatosensory area, lower limb	4/301	0.988887	0.999996	0	0	0.399139	0.00446044	FOXG1;HMGCR;SLC7A1;DUSP6
Primary somatosensory area, trunk, layer 1	4/301	0.988887	0.999996	0	0	0.399139	0.00446044	RBM39;TRIM28;ENC1;EIF4EBP1
Primary somatosensory area, trunk, layer 2/3	4/301	0.988887	0.999996	0	0	0.399139	0.00446044	ENC1;EIF4EBP1;TNRC18;DUSP6
Primary somatosensory area, upper limb, layer 1	4/301	0.988887	0.999996	0	0	0.399139	0.00446044	TRIM28;EIF4EBP1;HLA-A;PHOX2A
Primary somatosensory area, upper limb, layer 2/3	4/301	0.988887	0.999996	0	0	0.399139	0.00446044	LARP1;ENC1;TNRC18;HLA-A
Retrochiasmatic area	4/301	0.988887	0.999996	0	0	0.399139	0.00446044	GAL;TRIM28;PEG10;CRABP1
Retrohippocampal region	4/301	0.988887	0.999996	0	0	0.399139	0.00446044	FOXG1;APEX1;TCF4;GATA3
Retrosplenial area, dorsal part, layer 1	4/301	0.988887	0.999996	0	0	0.399139	0.00446044	LRBA;CRABP1;SMC4;SMARCA4
Retrosplenial area, dorsal part, layer 2/3	4/301	0.988887	0.999996	0	0	0.399139	0.00446044	CRABP1;SF3B1;DUSP6;SMARCA4
Secondary motor area	4/301	0.988887	0.999996	0	0	0.399139	0.00446044	TYROBP;SH3BGRL3;INSM2;SMARCA4
Secondary motor area, layer 1	4/301	0.988887	0.999996	0	0	0.399139	0.00446044	ENC1;UBA1;PBX1;SMARCA4
Septohippocampal nucleus	4/301	0.988887	0.999996	0	0	0.399139	0.00446044	SOX2;SYT4;PNOC;SMC4
Somatosensory areas	4/301	0.988887	0.999996	0	0	0.399139	0.00446044	LARP1;LRP1;INSM2;PTN
Spinal nucleus of the trigeminal, oral part, ventrolateral part	4/301	0.988887	0.999996	0	0	0.399139	0.00446044	LGALS1;KIF5B;LAPTM5;GATA3
Striatum ventral region	4/301	0.988887	0.999996	0	0	0.399139	0.00446044	ALCAM;ACTN1;CDC42EP3;ID4
Subiculum, ventral part	4/301	0.988887	0.999996	0	0	0.399139	0.00446044	LARP1;YWHAB;APEX1;GATA3
Temporal association areas	4/301	0.988887	0.999996	0	0	0.399139	0.00446044	YWHAB;PLAUR;PLIN2;RPS27A
Tuberomammillary nucleus, ventral part	4/301	0.988887	0.999996	0	0	0.399139	0.00446044	TRIM28;AHNAK;RPL12;FOXM1
Ventral cochlear nucleus	4/301	0.988887	0.999996	0	0	0.399139	0.00446044	CCL20;PLIN2;GATA3;RBMX
Ventral part of the lateral geniculate complex	4/301	0.988887	0.999996	0	0	0.399139	0.00446044	YWHAQ;UNC5C;MVD;LSS
Vestibular nuclei	4/301	0.988887	0.999996	0	0	0.399139	0.00446044	TTR;LRBA;ITGB2;SOX11
anterior pretectal nucleus, ventral core part	4/301	0.988887	0.999996	0	0	0.399139	0.00446044	RIMS3;RGS16;KIF5A;RPL24
cerebellar nuclei of CbH	4/301	0.988887	0.999996	0	0	0.399139	0.00446044	ITGB2;SPRY4;DBI;PBX1
dorsal nucleus of the lateral lemniscus	4/301	0.988887	0.999996	0	0	0.399139	0.00446044	STC2;CFL1;S100A6;EMILIN1
dorsolateral (non-cerebellar) part of isA	4/301	0.988887	0.999996	0	0	0.399139	0.00446044	RPS18;EBF3;RPS20;NCAM1
dorsolateral IC periaqueductal gray	4/301	0.988887	0.999996	0	0	0.399139	0.00446044	RPS8;PLXNA1;SNCG;AGRN
forebrain	4/301	0.988887	0.999996	0	0	0.399139	0.00446044	NCAN;ENC1;DCX;DUSP6
horizontal nucleus of the diagonal band, transitional part	4/301	0.988887	0.999996	0	0	0.399139	0.00446044	NRG4;TARS;TIMP1;SMARCA4
intermediate (interpositus) cerebellar nucleus	4/301	0.988887	0.999996	0	0	0.399139	0.00446044	SHMT2;ITGB2;SPRY4;PBX1
intermediate part of StrSe	4/301	0.988887	0.999996	0	0	0.399139	0.00446044	SOX2;SYT4;ALCAM;XPR1
intermediate part of r2B	4/301	0.988887	0.999996	0	0	0.399139	0.00446044	YARS;KIF26A;SPP1;AGRN
intermediate part of r5B	4/301	0.988887	0.999996	0	0	0.399139	0.00446044	YARS;HSPG2;PHOX2A;HIST1H1C
intermediate part of r6B	4/301	0.988887	0.999996	0	0	0.399139	0.00446044	IL1B;SNCG;MKI67;PHOX2A
intermediate part of r9B	4/301	0.988887	0.999996	0	0	0.399139	0.00446044	TOP2A;LGALS1;SNCG;MKI67
intermediate stratum of CbH	4/301	0.988887	0.999996	0	0	0.399139	0.00446044	ITGB2;SPRY4;DBI;PBX1
intermediate stratum of Ist	4/301	0.988887	0.999996	0	0	0.399139	0.00446044	STC2;CFL1;S100A6;EMILIN1
intermediate stratum of JcPV	4/301	0.988887	0.999996	0	0	0.399139	0.00446044	RBM39;UNC5B;NSG1;ATP5G3
intermediate stratum of PcPV	4/301	0.988887	0.999996	0	0	0.399139	0.00446044	RIMS3;RGS16;KIF5A;RPL24
intermediate stratum of RMa	4/301	0.988887	0.999996	0	0	0.399139	0.00446044	SLC7A5;IL1RN;FOXM1;RPS13
intermediate stratum of m1AL	4/301	0.988887	0.999996	0	0	0.399139	0.00446044	TOP2A;GRN;S100A6;P4HB
intermediate stratum of m2Lim	4/301	0.988887	0.999996	0	0	0.399139	0.00446044	AHNAK;ITGB2;IGF2;TIMP1
intermediate stratum of p1Lim	4/301	0.988887	0.999996	0	0	0.399139	0.00446044	EIF3L;IGF2;AP2M1;SMARCA4
intermediate stratum of p2Lim	4/301	0.988887	0.999996	0	0	0.399139	0.00446044	EIF3L;RGS16;IGF2;SCG2
intermediate stratum of r1Tr	4/301	0.988887	0.999996	0	0	0.399139	0.00446044	SLC10A4;RPS18;RPS20;WHSC1
intermediate stratum of r1Ve	4/301	0.988887	0.999996	0	0	0.399139	0.00446044	LGALS1;SPP1;NEUROG2;WLS
intermediate stratum of r2Tr	4/301	0.988887	0.999996	0	0	0.399139	0.00446044	SLC10A4;LGALS1;SPP1;MSN
intermediate stratum of r3BI	4/301	0.988887	0.999996	0	0	0.399139	0.00446044	YARS;SPP1;AGRN;AP2M1
intermediate stratum of r3Ve	4/301	0.988887	0.999996	0	0	0.399139	0.00446044	LRBA;CAPRIN1;SOX11;WHSC1
intermediate stratum of r4Lim	4/301	0.988887	0.999996	0	0	0.399139	0.00446044	LGALS1;PRDX1;GPC2;MMP9
intermediate stratum of r5BI	4/301	0.988887	0.999996	0	0	0.399139	0.00446044	YARS;HSPG2;PHOX2A;HIST1H1C
intermediate stratum of r5Tr	4/301	0.988887	0.999996	0	0	0.399139	0.00446044	YARS;NSD1;GPC2;RPL37
intermediate stratum of r6BI	4/301	0.988887	0.999996	0	0	0.399139	0.00446044	YARS;SYT4;SNCG;PHOX2A
intermediate stratum of r6BL	4/301	0.988887	0.999996	0	0	0.399139	0.00446044	YARS;CEBPG;GPC2;PHOX2A
intermediate stratum of r8BL	4/301	0.988887	0.999996	0	0	0.399139	0.00446044	TOP2A;TRIM28;NRG4;HLA-A
intermediate stratum of r8Tr	4/301	0.988887	0.999996	0	0	0.399139	0.00446044	SOX11;SLC38A2;EIF4B;ZMPSTE24
intermediate stratum of r9BI	4/301	0.988887	0.999996	0	0	0.399139	0.00446044	TOP2A;YARS;SNCG;MKI67
intermediate stratum of r9BM	4/301	0.988887	0.999996	0	0	0.399139	0.00446044	TOP2A;GDF15;SNCG;MKI67
lateral part of m2A	4/301	0.988887	0.999996	0	0	0.399139	0.00446044	AHNAK;RPS8;PLXNA1;EBF3
lateral part of r4B	4/301	0.988887	0.999996	0	0	0.399139	0.00446044	LRBA;SPP1;SLC38A2;MMP9
lateral part of r8B	4/301	0.988887	0.999996	0	0	0.399139	0.00446044	TOP2A;TRIM28;NRG4;HLA-A
lateral periretromammillary nucleus	4/301	0.988887	0.999996	0	0	0.399139	0.00446044	PABPC4;RPL12;IGF2;RPS13
lateral terminal nucleus of the accessory optic tract, ventral part	4/301	0.988887	0.999996	0	0	0.399139	0.00446044	AHNAK;IGF2;TIMP1;AP2M1
layer 1 of CCx	4/301	0.988887	0.999996	0	0	0.399139	0.00446044	MMP14;GDF15;SMC4;SMARCA4
layer 1 of VPrP cortex	4/301	0.988887	0.999996	0	0	0.399139	0.00446044	TYROBP;PTN;HMGCR;AP2M1
layer 2 of LPrP cortex	4/301	0.988887	0.999996	0	0	0.399139	0.00446044	ACTR2;TYROBP;CNOT1;PTN
layer 2 of PCx	4/301	0.988887	0.999996	0	0	0.399139	0.00446044	ENC1;EIF4EBP1;SMC4;DUSP6
layer 3 of LPrP cortex	4/301	0.988887	0.999996	0	0	0.399139	0.00446044	ACTR2;TYROBP;ISLR2;PTN
layer 3 of PCx	4/301	0.988887	0.999996	0	0	0.399139	0.00446044	RGS4;ENC1;TNRC18;DUSP6
layer 3 of PrS	4/301	0.988887	0.999996	0	0	0.399139	0.00446044	TMEFF1;HNRNPK;UNC5C;TCF4
liminal part of alar p1	4/301	0.988887	0.999996	0	0	0.399139	0.00446044	YARS;IGF2;RPL24;EBF3
liminal part of r2 alar plate	4/301	0.988887	0.999996	0	0	0.399139	0.00446044	SLC10A4;LGALS1;MSN;LCP1
mammillary part of PHyB	4/301	0.988887	0.999996	0	0	0.399139	0.00446044	IL1RN;IGF2;S100A6;TIMP1
mantle zone of RMa	4/301	0.988887	0.999996	0	0	0.399139	0.00446044	IL1RN;IGF2;S100A6;TIMP1
mantle zone of TG	4/301	0.988887	0.999996	0	0	0.399139	0.00446044	TRIM28;GDF15;RPL27;PROX1
mantle zone of m2AL	4/301	0.988887	0.999996	0	0	0.399139	0.00446044	AHNAK;RPS8;PLXNA1;EBF3
mantle zone of p1Lim	4/301	0.988887	0.999996	0	0	0.399139	0.00446044	YARS;IGF2;RPL24;EBF3
mantle zone of p2Lim	4/301	0.988887	0.999996	0	0	0.399139	0.00446044	RIMS3;RGS16;RPL24;LSS
mantle zone of r10Ve	4/301	0.988887	0.999996	0	0	0.399139	0.00446044	GDF15;IGFBP3;PLIN2;UBA1
mantle zone of r2BI	4/301	0.988887	0.999996	0	0	0.399139	0.00446044	YARS;KIF26A;SPP1;AGRN
mantle zone of r2Co	4/301	0.988887	0.999996	0	0	0.399139	0.00446044	BTG1;IGFBP2;LCP1;ZFP36L1
mantle zone of r2Lim	4/301	0.988887	0.999996	0	0	0.399139	0.00446044	SLC10A4;LGALS1;MSN;LCP1
mantle zone of r4BL	4/301	0.988887	0.999996	0	0	0.399139	0.00446044	LRBA;SPP1;SLC38A2;MMP9
mantle zone of r4BM	4/301	0.988887	0.999996	0	0	0.399139	0.00446044	AHNAK;STXBP1;MAB21L2;SPP1
mantle zone of r5BI	4/301	0.988887	0.999996	0	0	0.399139	0.00446044	YARS;HSPG2;PHOX2A;HIST1H1C
mantle zone of r6BI	4/301	0.988887	0.999996	0	0	0.399139	0.00446044	IL1B;SNCG;MKI67;PHOX2A
mantle zone of r7Co	4/301	0.988887	0.999996	0	0	0.399139	0.00446044	FADS2;MMP14;ENPP2;WLS
mantle zone of r8BL	4/301	0.988887	0.999996	0	0	0.399139	0.00446044	TOP2A;TRIM28;NRG4;HLA-A
mantle zone of r9BI	4/301	0.988887	0.999996	0	0	0.399139	0.00446044	TOP2A;LGALS1;SNCG;MKI67
medial part of r4B	4/301	0.988887	0.999996	0	0	0.399139	0.00446044	AHNAK;STXBP1;MAB21L2;SPP1
mesomere 2 (preisthmus or caudal midbrain)	4/301	0.988887	0.999996	0	0	0.399139	0.00446044	SLC10A4;RBM39;AHNAK;EBF3
neural plate	4/301	0.988887	0.999996	0	0	0.399139	0.00446044	BTG1;FABP7;ENC1;DUSP6
nucleus of the inferior collicular brachium, caudal part	4/301	0.988887	0.999996	0	0	0.399139	0.00446044	TOP2A;GRN;S100A6;P4HB
nucleus sagulum, superficial part	4/301	0.988887	0.999996	0	0	0.399139	0.00446044	RBM39;IGFBP2;S100A6;TAGLN2
perilemniscal isthmic area	4/301	0.988887	0.999996	0	0	0.399139	0.00446044	RBM39;CFL1;S100A6;NEUROG2
periventricular stratum of IC	4/301	0.988887	0.999996	0	0	0.399139	0.00446044	RPS8;PLXNA1;SNCG;AGRN
periventricular stratum of r2Ve	4/301	0.988887	0.999996	0	0	0.399139	0.00446044	CDK6;HNRNPA2B1;DBI;CHGB
periventricular stratum of r3Co	4/301	0.988887	0.999996	0	0	0.399139	0.00446044	MMP14;IGFBP2;ITGB2;ENPP2
periventricular stratum of r3Ve	4/301	0.988887	0.999996	0	0	0.399139	0.00446044	TTR;PRKDC;IGFBP2;PHOX2A
periventricular stratum of r4Co	4/301	0.988887	0.999996	0	0	0.399139	0.00446044	MMP14;TTR;ENPP2;LCP1
periventricular stratum of r5Co	4/301	0.988887	0.999996	0	0	0.399139	0.00446044	MMP14;CCL20;ENPP2;WLS
periventricular stratum of r6Co	4/301	0.988887	0.999996	0	0	0.399139	0.00446044	FADS2;MMP14;CCL20;ENPP2
periventricular stratum of r6Tr	4/301	0.988887	0.999996	0	0	0.399139	0.00446044	ACLY;SYT4;CEBPG;MAB21L2
periventricular stratum of r8BM	4/301	0.988887	0.999996	0	0	0.399139	0.00446044	ACLY;LGALS1;MAB21L2;FAU
pontomedullary hindbrain	4/301	0.988887	0.999996	0	0	0.399139	0.00446044	LGALS1;NRG4;SPP1;HSPG2
r1 part of dorsal parvicellular reticular formation	4/301	0.988887	0.999996	0	0	0.399139	0.00446044	SLC10A4;RPS18;RPS20;WHSC1
r1 part of intermediate nucleus of the lateral lemniscus	4/301	0.988887	0.999996	0	0	0.399139	0.00446044	IL1RN;AHNAK;IGFBP3;DDR2
r1 part of superior vestibular nucleus	4/301	0.988887	0.999996	0	0	0.399139	0.00446044	LGALS1;SPP1;NEUROG2;WLS
r10 basal plate	4/301	0.988887	0.999996	0	0	0.399139	0.00446044	TOP2A;LGALS1;TRIB3;MKI67
r10 part of gigantocellular reticular area	4/301	0.988887	0.999996	0	0	0.399139	0.00446044	TOP2A;TSC22D1;TRIB3;MKI67
r10 part of the vestibular column	4/301	0.988887	0.999996	0	0	0.399139	0.00446044	GDF15;IGFBP3;PLIN2;UBA1
r2 part of anteroventral cochlear nucleus	4/301	0.988887	0.999996	0	0	0.399139	0.00446044	BTG1;IGFBP2;LCP1;ZFP36L1
r2 part of cochlear sensory column	4/301	0.988887	0.999996	0	0	0.399139	0.00446044	BTG1;IGFBP2;LCP1;ZFP36L1
r2 part of dorsal parvicellular reticular formation	4/301	0.988887	0.999996	0	0	0.399139	0.00446044	SLC10A4;LGALS1;SPP1;MSN
r2 part of ventral lateral lemniscal nucleus	4/301	0.988887	0.999996	0	0	0.399139	0.00446044	MMP14;AHNAK;DDX21;TAGLN2
r2 part of vestibular nucleus Y	4/301	0.988887	0.999996	0	0	0.399139	0.00446044	CDK6;HNRNPA2B1;DBI;CHGB
r3 part of basointermediate reticular formation	4/301	0.988887	0.999996	0	0	0.399139	0.00446044	YARS;SPP1;AGRN;AP2M1
r3 part of basomedial reticular formation	4/301	0.988887	0.999996	0	0	0.399139	0.00446044	YARS;KIF26A;KIF5C;SPP1
r3 part of dorsal cochlear nucleus	4/301	0.988887	0.999996	0	0	0.399139	0.00446044	MMP14;IGFBP2;ITGB2;ENPP2
r3 part of magnocellular medial vestibular nucleus	4/301	0.988887	0.999996	0	0	0.399139	0.00446044	LRBA;CAPRIN1;SOX11;WHSC1
r3 part of parvicellular medial vestibular nucleus	4/301	0.988887	0.999996	0	0	0.399139	0.00446044	TTR;PRKDC;IGFBP2;PHOX2A
r4 part of dorsal cochlear nucleus	4/301	0.988887	0.999996	0	0	0.399139	0.00446044	MMP14;TTR;ENPP2;LCP1
r4 part of lateral pontine nuclei	4/301	0.988887	0.999996	0	0	0.399139	0.00446044	NRG4;TARS;INA;RPS13
r4 part of ventral parvicellular reticular formation	4/301	0.988887	0.999996	0	0	0.399139	0.00446044	LGALS1;PRDX1;GPC2;MMP9
r5 (gustatory) part of solitary complex	4/301	0.988887	0.999996	0	0	0.399139	0.00446044	RGS5;SYT4;CEBPG;WHSC1
r5 part of basointermediate reticular formation	4/301	0.988887	0.999996	0	0	0.399139	0.00446044	YARS;HSPG2;PHOX2A;HIST1H1C
r5 part of dorsal cochlear nucleus	4/301	0.988887	0.999996	0	0	0.399139	0.00446044	MMP14;CCL20;ENPP2;WLS
r5 part of dorsal parvicellular reticular formation	4/301	0.988887	0.999996	0	0	0.399139	0.00446044	YARS;NSD1;GPC2;RPL37
r6 (gustatory) part of solitary complex	4/301	0.988887	0.999996	0	0	0.399139	0.00446044	ACLY;SYT4;CEBPG;MAB21L2
r6 part of basointermediate reticular formation	4/301	0.988887	0.999996	0	0	0.399139	0.00446044	YARS;SYT4;SNCG;PHOX2A
r6 part of basomedial reticular formation	4/301	0.988887	0.999996	0	0	0.399139	0.00446044	YARS;SYT4;SPP1;PBX1
r6 part of dorsal cochlear nucleus	4/301	0.988887	0.999996	0	0	0.399139	0.00446044	FADS2;MMP14;CCL20;ENPP2
r6 part of dorsal parvicellular reticular formation	4/301	0.988887	0.999996	0	0	0.399139	0.00446044	YARS;NSD1;SOX11;EIF4B
r6 part of rostral ventromedial reticular area	4/301	0.988887	0.999996	0	0	0.399139	0.00446044	NRG4;IL1B;MKI67;PHOX2A
r6 part of the basolateral reticular formation	4/301	0.988887	0.999996	0	0	0.399139	0.00446044	YARS;CEBPG;GPC2;PHOX2A
r6 part of ventral gigangocellular reticular area	4/301	0.988887	0.999996	0	0	0.399139	0.00446044	IL1B;SNCG;TRIB3;MKI67
r7 part of basomedial reticular formation	4/301	0.988887	0.999996	0	0	0.399139	0.00446044	YARS;SPP1;TRIB3;PBX1
r7 part of cochlear column	4/301	0.988887	0.999996	0	0	0.399139	0.00446044	FADS2;MMP14;ENPP2;WLS
r7 part of parapyramidal nucleus	4/301	0.988887	0.999996	0	0	0.399139	0.00446044	NRG4;IL1B;SNCG;MKI67
r7 part of the nucleus of Roller	4/301	0.988887	0.999996	0	0	0.399139	0.00446044	MAB21L2;SNCG;TIMP1;FDFT1
r8 part of basolateral reticular formation	4/301	0.988887	0.999996	0	0	0.399139	0.00446044	TOP2A;TRIM28;NRG4;HLA-A
r8 part of dorsal parvicellular reticular formation	4/301	0.988887	0.999996	0	0	0.399139	0.00446044	SOX11;SLC38A2;EIF4B;ZMPSTE24
r9 part of basointermediate reticular formation	4/301	0.988887	0.999996	0	0	0.399139	0.00446044	TOP2A;YARS;SNCG;MKI67
r9 part of gigantocellular reticular area	4/301	0.988887	0.999996	0	0	0.399139	0.00446044	TOP2A;GDF15;SNCG;MKI67
r9 part of nucleus of Roller	4/301	0.988887	0.999996	0	0	0.399139	0.00446044	TOP2A;ACLY;LGALS1;GDF15
r9 part of trigeminal transition zone	4/301	0.988887	0.999996	0	0	0.399139	0.00446044	SLC38A2;YWHAZ;EIF4B;ZMPSTE24
reticular formation of p1Lim	4/301	0.988887	0.999996	0	0	0.399139	0.00446044	EIF3L;IGF2;AP2M1;SMARCA4
reticular formation of p2Lim	4/301	0.988887	0.999996	0	0	0.399139	0.00446044	EIF3L;RGS16;IGF2;SCG2
retromammillary area	4/301	0.988887	0.999996	0	0	0.399139	0.00446044	IL1RN;IGF2;S100A6;TIMP1
retromammillary area, lateral part	4/301	0.988887	0.999996	0	0	0.399139	0.00446044	SLC7A5;IL1RN;FOXM1;RPS13
rhombomere 2	4/301	0.988887	0.999996	0	0	0.399139	0.00446044	SLC10A4;YARS;LGALS1;SPP1
rhombomere 3	4/301	0.988887	0.999996	0	0	0.399139	0.00446044	KIF5B;SPP1;HMGA1;NEFL
rhombomere 5	4/301	0.988887	0.999996	0	0	0.399139	0.00446044	LGALS1;TTR;SPP1;HSPG2
rhombomere 6	4/301	0.988887	0.999996	0	0	0.399139	0.00446044	SLC10A4;SYT4;NRG4;MSN
rhombomere 9	4/301	0.988887	0.999996	0	0	0.399139	0.00446044	TOP2A;LGALS1;GAL;MKI67
root	4/301	0.988887	0.999996	0	0	0.399139	0.00446044	FABP7;ENC1;GATA3;DUSP6
shell of SCH	4/301	0.988887	0.999996	0	0	0.399139	0.00446044	CRABP1;IGF2;TRIB3;MMP9
shell part of the anterobasal nucleus	4/301	0.988887	0.999996	0	0	0.399139	0.00446044	VAT1;TRIM28;PEG10;SMC4
subbrachial nucleus, caudal part	4/301	0.988887	0.999996	0	0	0.399139	0.00446044	GRN;AHNAK;RPL37;YWHAZ
subpretectal nucleus	4/301	0.988887	0.999996	0	0	0.399139	0.00446044	YARS;UNC5B;HNRNPA2B1;ATP5G3
subthalamic nucleus (migrated)	4/301	0.988887	0.999996	0	0	0.399139	0.00446044	RAB31;GNG2;IGF2;TMBIM6
superficial stratum of CoPV	4/301	0.988887	0.999996	0	0	0.399139	0.00446044	AHNAK;IGF2;TIMP1;AP2M1
superficial stratum of DTTh	4/301	0.988887	0.999996	0	0	0.399139	0.00446044	RGS16;WAC;UNC5C;PROX1
superficial stratum of LAP	4/301	0.988887	0.999996	0	0	0.399139	0.00446044	MARCKSL1;APEX1;TBX3;PRPH
superficial stratum of Mam	4/301	0.988887	0.999996	0	0	0.399139	0.00446044	AHNAK;PABPC4;RPL12;RPS13
superficial stratum of PHyB-P	4/301	0.988887	0.999996	0	0	0.399139	0.00446044	PABPC4;RPL12;IGF2;RPS13
superficial stratum of S	4/301	0.988887	0.999996	0	0	0.399139	0.00446044	TMEFF1;XPOT;APEX1;SLIT3
superficial stratum of SeDg	4/301	0.988887	0.999996	0	0	0.399139	0.00446044	NRG4;TARS;TIMP1;SMARCA4
superficial stratum of TSPaA	4/301	0.988887	0.999996	0	0	0.399139	0.00446044	CRABP1;IGF2;TRIB3;MMP9
superficial stratum of m2ADL	4/301	0.988887	0.999996	0	0	0.399139	0.00446044	RBM39;IGFBP2;S100A6;TAGLN2
superficial stratum of r10Tr	4/301	0.988887	0.999996	0	0	0.399139	0.00446044	GAL;EBF3;TNRC18;ATP9A
superficial stratum of r1BL	4/301	0.988887	0.999996	0	0	0.399139	0.00446044	IL1RN;AHNAK;IGFBP3;DDR2
superficial stratum of r2BL	4/301	0.988887	0.999996	0	0	0.399139	0.00446044	MMP14;AHNAK;DDX21;TAGLN2
superficial stratum of r2Co	4/301	0.988887	0.999996	0	0	0.399139	0.00446044	BTG1;IGFBP2;LCP1;ZFP36L1
superficial stratum of r4BI	4/301	0.988887	0.999996	0	0	0.399139	0.00446044	NRG4;TARS;INA;RPS13
superficial stratum of r7BM	4/301	0.988887	0.999996	0	0	0.399139	0.00446044	NRG4;IL1B;SNCG;MKI67
superficial stratum of r8BM	4/301	0.988887	0.999996	0	0	0.399139	0.00446044	RBM39;GAL;RPL27;PBX1
tectal gray formation	4/301	0.988887	0.999996	0	0	0.399139	0.00446044	TRIM28;GDF15;RPL27;PROX1
temporotympanic muscle trigeminal motor cell group	4/301	0.988887	0.999996	0	0	0.399139	0.00446044	ACLY;LGALS1;LSS;AP2M1
ventral juxtacommissural pretectal nucleus	4/301	0.988887	0.999996	0	0	0.399139	0.00446044	RBM39;UNC5B;NSG1;ATP5G3
ventral posterolateral nucleus	4/301	0.988887	0.999996	0	0	0.399139	0.00446044	RAB31;RGS16;NR2F1;CLASP2
ventrolateral part of alar p1	4/301	0.988887	0.999996	0	0	0.399139	0.00446044	YARS;IGF2;RPL24;EBF3
Subgeniculate nucleus	7/443	0.98996	0.999996	0	0	0.474552	0.00478881	YWHAQ;CRABP1;PNOC;MSN;MVD;LSS;DDR2
Cuneiform nucleus	9/530	0.990113	0.999996	0	0	0.509895	0.00506628	RBM39;AHNAK;SHMT2;RPS18;PLXNA1;RPS20;GATA3;WHSC1;SLC38A2
Midbrain	6/404	0.991105	0.999996	0	0	0.445794	0.00398326	SLC10A4;CHRNA3;S100A6;RPL27;GATA3;SMC4
Tuberal nucleus	6/427	0.994673	0.999996	0	0	0.420928	0.00224827	VAT1;PCSK1N;TRIM28;PEG10;CRABP1;FOXM1
Agranular insular area, posterior part	3/301	0.997054	0.999996	0	0	0.297871	0.000878963	GNG2;ISLR2;FDFT1
Central lobule	3/301	0.997054	0.999996	0	0	0.297871	0.000878963	BTG1;PTPRZ1;VIM
Cochlear nuclei	3/301	0.997054	0.999996	0	0	0.297871	0.000878963	CCL20;GATA3;LCP1
Dentate nucleus	3/301	0.997054	0.999996	0	0	0.297871	0.000878963	RBM39;CCL20;DBI
Entorhinal area	3/301	0.997054	0.999996	0	0	0.297871	0.000878963	CDH2;PLIN2;TBX3
Entorhinal area, lateral part	3/301	0.997054	0.999996	0	0	0.297871	0.000878963	CDH2;PLIN2;TBX3
Entorhinal area, lateral part, layer 1	3/301	0.997054	0.999996	0	0	0.297871	0.000878963	FOXG1;APEX1;KPNB1
Entorhinal area, lateral part, layer 2a	3/301	0.997054	0.999996	0	0	0.297871	0.000878963	APEX1;KPNB1;TBX3
Entorhinal area, medial part, dorsal zone, layer 2	3/301	0.997054	0.999996	0	0	0.297871	0.000878963	TMEFF1;LARP1;GATA3
External cuneate nucleus	3/301	0.997054	0.999996	0	0	0.297871	0.000878963	IL1B;IGFBP3;VIM
Frontal pole, layer 1	3/301	0.997054	0.999996	0	0	0.297871	0.000878963	IL1RN;SH3BGRL3;SOX4
Gustatory areas, layer 2/3	3/301	0.997054	0.999996	0	0	0.297871	0.000878963	LARP1;CNOT1;HNRNPF
Inferior colliculus, dorsal nucleus	3/301	0.997054	0.999996	0	0	0.297871	0.000878963	CRABP1;NEUROG2;SMARCA4
Koelliker-Fuse subnucleus	3/301	0.997054	0.999996	0	0	0.297871	0.000878963	SLC10A4;LGALS1;GATA3
Lateral amygdalar nucleus	3/301	0.997054	0.999996	0	0	0.297871	0.000878963	IL1B;DBI;ADNP
Lateral vestibular nucleus	3/301	0.997054	0.999996	0	0	0.297871	0.000878963	LRBA;CAPRIN1;SOX11
Linear nucleus of the medulla	3/301	0.997054	0.999996	0	0	0.297871	0.000878963	SOX11;EIF4B;ZMPSTE24
Lobule III, molecular layer	3/301	0.997054	0.999996	0	0	0.297871	0.000878963	BTG1;PTPRZ1;VIM
Magnocellular reticular nucleus	3/301	0.997054	0.999996	0	0	0.297871	0.000878963	TOP2A;IL1B;MKI67
Medulla, motor related	3/301	0.997054	0.999996	0	0	0.297871	0.000878963	YARS;ACLY;LGALS1
Motor nucleus of trigeminal	3/301	0.997054	0.999996	0	0	0.297871	0.000878963	SLC10A4;LGALS1;MSN
Nucleus of the lateral lemniscus	3/301	0.997054	0.999996	0	0	0.297871	0.000878963	AHNAK;IGFBP3;GATA3
Nucleus of the lateral lemniscus, dorsal part	3/301	0.997054	0.999996	0	0	0.297871	0.000878963	RBM39;AHNAK;GATA3
Olfactory tubercle, molecular layer	3/301	0.997054	0.999996	0	0	0.297871	0.000878963	CDC42EP3;TRIB3;YBX1
Olfactory tubercle, polymorph layer	3/301	0.997054	0.999996	0	0	0.297871	0.000878963	TSC22D1;CDC42EP3;YBX1
Parasubthalamic nucleus	3/301	0.997054	0.999996	0	0	0.297871	0.000878963	GNG2;IGF2;GNAI2
Parvicellular reticular nucleus	3/301	0.997054	0.999996	0	0	0.297871	0.000878963	YARS;SOX11;EIF4B
Piriform area, molecular layer	3/301	0.997054	0.999996	0	0	0.297871	0.000878963	TYROBP;STMN2;PTN
Pontine reticular nucleus	3/301	0.997054	0.999996	0	0	0.297871	0.000878963	SLC10A4;YARS;SPP1
Posterolateral visual area, layer 1	3/301	0.997054	0.999996	0	0	0.297871	0.000878963	PLIN2;INSM2;DUSP6
Postsubiculum, layer 2	3/301	0.997054	0.999996	0	0	0.297871	0.000878963	GDF15;STC2;GATA3
Presubiculum, layer 1	3/301	0.997054	0.999996	0	0	0.297871	0.000878963	PKIA;IGF2;PROX1
Presubiculum, layer 2	3/301	0.997054	0.999996	0	0	0.297871	0.000878963	GDF15;TCF4;GATA3
Primary motor area, Layer 1	3/301	0.997054	0.999996	0	0	0.297871	0.000878963	TRIM28;ENC1;EIF4EBP1
Primary somatosensory area, barrel field, layer 1	3/301	0.997054	0.999996	0	0	0.297871	0.000878963	RBM39;KIF26A;EIF4EBP1
Primary somatosensory area, mouth, layer 2/3	3/301	0.997054	0.999996	0	0	0.297871	0.000878963	LARP1;TNRC18;SMC4
Principal sensory nucleus of the trigeminal	3/301	0.997054	0.999996	0	0	0.297871	0.000878963	LGALS1;GATA3;LSS
Retrosplenial area, ventral part, layer 2	3/301	0.997054	0.999996	0	0	0.297871	0.000878963	MMP14;IL1B;SMARCA4
Retrosplenial area, ventral part, layer 2/3	3/301	0.997054	0.999996	0	0	0.297871	0.000878963	MMP14;IL1B;SMARCA4
Retrosplenial area, ventral part, layer 6a	3/301	0.997054	0.999996	0	0	0.297871	0.000878963	MYO5A;S100A4;TCF4
Secondary motor area, layer 2/3	3/301	0.997054	0.999996	0	0	0.297871	0.000878963	ENC1;INSM2;SMARCA4
Spinal nucleus of the trigeminal, interpolar part	3/301	0.997054	0.999996	0	0	0.297871	0.000878963	MAB21L2;LAPTM5;GATA3
Superior colliculus, motor related	3/301	0.997054	0.999996	0	0	0.297871	0.000878963	CHRNA3;RPL27;GATA3
Superior colliculus, motor related, intermediate gray layer	3/301	0.997054	0.999996	0	0	0.297871	0.000878963	CHRNA3;RPL27;GATA3
Superior colliculus, motor related, intermediate gray layer, sublayer b	3/301	0.997054	0.999996	0	0	0.297871	0.000878963	CHRNA3;RPL27;GATA3
Superior colliculus, motor related, intermediate gray layer, sublayer c	3/301	0.997054	0.999996	0	0	0.297871	0.000878963	CHRNA3;RPL24;RPL27
Supramammillary nucleus	3/301	0.997054	0.999996	0	0	0.297871	0.000878963	DNER;IGF2;SCG2
Supramammillary nucleus, lateral part	3/301	0.997054	0.999996	0	0	0.297871	0.000878963	PABPC4;IGF2;EBF3
Supratrigeminal nucleus	3/301	0.997054	0.999996	0	0	0.297871	0.000878963	SLC10A4;LGALS1;WHSC1
abducens motor nucleus	3/301	0.997054	0.999996	0	0	0.297871	0.000878963	LGALS1;GDF15;CEBPG
alar part of terminal hypothalamus	3/301	0.997054	0.999996	0	0	0.297871	0.000878963	GAL;PEG10;TRIB3
alar plate of m1	3/301	0.997054	0.999996	0	0	0.297871	0.000878963	S100A6;RPL27;SMC4
anterior part of Int	3/301	0.997054	0.999996	0	0	0.297871	0.000878963	BTG1;SPRY4;PBX1
basolateral amygdaloid nucleus, posterior part	3/301	0.997054	0.999996	0	0	0.297871	0.000878963	NR2F1;PLAUR;ILF2
collicular (rostral) midbrain tectum	3/301	0.997054	0.999996	0	0	0.297871	0.000878963	S100A6;RPL27;SMC4
corticoid layer of TuStr	3/301	0.997054	0.999996	0	0	0.297871	0.000878963	CDC42EP3;ID4;YBX1
diagonal domain	3/301	0.997054	0.999996	0	0	0.297871	0.000878963	SLC10A4;PABPC4;CRABP1
dorsolateral part of Int	3/301	0.997054	0.999996	0	0	0.297871	0.000878963	CDK6;CCL20;SMC4
dorsolateral part of m1A	3/301	0.997054	0.999996	0	0	0.297871	0.000878963	S100A6;RPL27;SMC4
dorsolateral part of m2A	3/301	0.997054	0.999996	0	0	0.297871	0.000878963	RBM39;S100A6;TAGLN2
external cortical nucleus of inferior colliculus	3/301	0.997054	0.999996	0	0	0.297871	0.000878963	AHNAK;S100A6;PLIN2
intermediate part of isB	3/301	0.997054	0.999996	0	0	0.297871	0.000878963	SLC10A4;RPL12;SNCG
intermediate part of r3B	3/301	0.997054	0.999996	0	0	0.297871	0.000878963	YARS;SPP1;AGRN
intermediate part of r7B	3/301	0.997054	0.999996	0	0	0.297871	0.000878963	SNCG;MKI67;PHOX2A
intermediate part of r8B	3/301	0.997054	0.999996	0	0	0.297871	0.000878963	TOP2A;SNCG;MKI67
intermediate stratum of SC	3/301	0.997054	0.999996	0	0	0.297871	0.000878963	CHRNA3;S100A6;RPL27
intermediate stratum of m2AL	3/301	0.997054	0.999996	0	0	0.297871	0.000878963	RBM39;AHNAK;PLXNA1
intermediate stratum of r10BM	3/301	0.997054	0.999996	0	0	0.297871	0.000878963	TOP2A;LGALS1;MKI67
intermediate stratum of r10Ve	3/301	0.997054	0.999996	0	0	0.297871	0.000878963	MMP14;IGFBP3;UBA1
intermediate stratum of r3BL	3/301	0.997054	0.999996	0	0	0.297871	0.000878963	YARS;LRBA;SPP1
intermediate stratum of r3BM	3/301	0.997054	0.999996	0	0	0.297871	0.000878963	KIF5B;SPP1;HMGA1
intermediate stratum of r3Lim	3/301	0.997054	0.999996	0	0	0.297871	0.000878963	LRBA;CAPRIN1;LCP1
intermediate stratum of r4BI	3/301	0.997054	0.999996	0	0	0.297871	0.000878963	PRKDC;SPP1;AGRN
intermediate stratum of r4BL	3/301	0.997054	0.999996	0	0	0.297871	0.000878963	LRBA;SPP1;MMP9
intermediate stratum of r4BM	3/301	0.997054	0.999996	0	0	0.297871	0.000878963	SPP1;SLC7A1;ZMPSTE24
intermediate stratum of r4Ve	3/301	0.997054	0.999996	0	0	0.297871	0.000878963	LRBA;CAPRIN1;SOX11
intermediate stratum of r5BM	3/301	0.997054	0.999996	0	0	0.297871	0.000878963	YARS;SPP1;HSPG2
intermediate stratum of r6Ve	3/301	0.997054	0.999996	0	0	0.297871	0.000878963	YARS;SOX11;PHOX2A
intermediate stratum of r7BI	3/301	0.997054	0.999996	0	0	0.297871	0.000878963	SNCG;FGFBP3;PHOX2A
intermediate stratum of r7BL	3/301	0.997054	0.999996	0	0	0.297871	0.000878963	NRG4;ZMPSTE24;PHOX2A
intermediate stratum of r7Tr	3/301	0.997054	0.999996	0	0	0.297871	0.000878963	SOX11;TAGLN2;EIF4B
intermediate stratum of r8BI	3/301	0.997054	0.999996	0	0	0.297871	0.000878963	TOP2A;SNCG;MKI67
intermediate stratum of r8BM	3/301	0.997054	0.999996	0	0	0.297871	0.000878963	TOP2A;SNCG;MKI67
intermediate stratum of r8Lim	3/301	0.997054	0.999996	0	0	0.297871	0.000878963	ACLY;LGALS1;EIF4B
internal cortical nucleus of inferior colliculus	3/301	0.997054	0.999996	0	0	0.297871	0.000878963	RBM39;AHNAK;S100A6
isthmus proper	3/301	0.997054	0.999996	0	0	0.297871	0.000878963	RBM39;S100A6;RPS20
lateral part of r3B	3/301	0.997054	0.999996	0	0	0.297871	0.000878963	NRG4;LRBA;SPP1
lateral part of r7B	3/301	0.997054	0.999996	0	0	0.297871	0.000878963	NRG4;ZMPSTE24;PHOX2A
lateral tuberal nucleus	3/301	0.997054	0.999996	0	0	0.297871	0.000878963	GRN;MARCKSL1;IGF2
layer 1 of LPrP cortex	3/301	0.997054	0.999996	0	0	0.297871	0.000878963	TYROBP;LAPTM5;PTN
layer 2 of CCx	3/301	0.997054	0.999996	0	0	0.297871	0.000878963	MMP14;GDF15;STC2
layer 2 of ERCx	3/301	0.997054	0.999996	0	0	0.297871	0.000878963	TMEFF1;APEX1;PLIN2
layer 2 of FCx	3/301	0.997054	0.999996	0	0	0.297871	0.000878963	IL1RN;LAPTM5;NEUROG2
layer 2 of InsCx	3/301	0.997054	0.999996	0	0	0.297871	0.000878963	ACTR2;LAPTM5;PLAUR
layer 2 of PaS	3/301	0.997054	0.999996	0	0	0.297871	0.000878963	GDF15;STC2;TCF4
layer 3 of ERCx	3/301	0.997054	0.999996	0	0	0.297871	0.000878963	LARP1;CDH2;PLIN2
layer 3 of FCx	3/301	0.997054	0.999996	0	0	0.297871	0.000878963	IL1RN;SH3BGRL3;INSM2
layer 3 of RSC	3/301	0.997054	0.999996	0	0	0.297871	0.000878963	STC2;NR2F1;TCF4
layer 5 of ERCx	3/301	0.997054	0.999996	0	0	0.297871	0.000878963	DNAJA1;CDH2;PLIN2
layer 5 of PaS	3/301	0.997054	0.999996	0	0	0.297871	0.000878963	CAP1;STC2;TCF4
liminal part of the r8 alar plate	3/301	0.997054	0.999996	0	0	0.297871	0.000878963	ACLY;LGALS1;EIF4B
magnocellular superficial hypothalamic nucleus	3/301	0.997054	0.999996	0	0	0.297871	0.000878963	GRN;PEG10;IGF2
mantle zone of IC	3/301	0.997054	0.999996	0	0	0.297871	0.000878963	AHNAK;S100A6;PLXNA1
mantle zone of Ist	3/301	0.997054	0.999996	0	0	0.297871	0.000878963	RBM39;S100A6;RPS20
mantle zone of Pal	3/301	0.997054	0.999996	0	0	0.297871	0.000878963	ACTN1;CRABP1;CDC42EP3
mantle zone of PcPV	3/301	0.997054	0.999996	0	0	0.297871	0.000878963	RIMS3;RGS16;RPL24
mantle zone of isBI	3/301	0.997054	0.999996	0	0	0.297871	0.000878963	SLC10A4;RPL12;SNCG
mantle zone of m2ADL	3/301	0.997054	0.999996	0	0	0.297871	0.000878963	RBM39;S100A6;TAGLN2
mantle zone of r2Tr	3/301	0.997054	0.999996	0	0	0.297871	0.000878963	LGALS1;SPP1;LSS
mantle zone of r3BI	3/301	0.997054	0.999996	0	0	0.297871	0.000878963	YARS;SPP1;AGRN
mantle zone of r3BL	3/301	0.997054	0.999996	0	0	0.297871	0.000878963	NRG4;LRBA;SPP1
mantle zone of r4BI	3/301	0.997054	0.999996	0	0	0.297871	0.000878963	SPP1;AGRN;MMP9
mantle zone of r5Ve	3/301	0.997054	0.999996	0	0	0.297871	0.000878963	TTR;IGFBP2;SOX11
mantle zone of r6Ve	3/301	0.997054	0.999996	0	0	0.297871	0.000878963	TTR;ITGB2;SOX11
mantle zone of r7BI	3/301	0.997054	0.999996	0	0	0.297871	0.000878963	SNCG;MKI67;PHOX2A
mantle zone of r7BL	3/301	0.997054	0.999996	0	0	0.297871	0.000878963	NRG4;ZMPSTE24;PHOX2A
mantle zone of r7Tr	3/301	0.997054	0.999996	0	0	0.297871	0.000878963	MAB21L2;TAGLN2;EIF4B
mantle zone of r8BI	3/301	0.997054	0.999996	0	0	0.297871	0.000878963	TOP2A;SNCG;MKI67
mantle zone of r8BM	3/301	0.997054	0.999996	0	0	0.297871	0.000878963	TOP2A;SNCG;MKI67
mantle zone of r8Lim	3/301	0.997054	0.999996	0	0	0.297871	0.000878963	ACLY;LGALS1;EIF4B
mantle zone of r9Tr	3/301	0.997054	0.999996	0	0	0.297871	0.000878963	MAB21L2;TAGLN2;EIF4B
medial part of r8B	3/301	0.997054	0.999996	0	0	0.297871	0.000878963	TOP2A;SNCG;MKI67
medial pretectal nucleus	3/301	0.997054	0.999996	0	0	0.297871	0.000878963	CHRNA3;RPL27;PRDX6
mesomere 1	3/301	0.997054	0.999996	0	0	0.297871	0.000878963	S100A6;RPL27;SMC4
navicular nucleus	3/301	0.997054	0.999996	0	0	0.297871	0.000878963	GDF15;FTH1;SURF4
pallidal islands of Calleja	3/301	0.997054	0.999996	0	0	0.297871	0.000878963	PABPC4;CDC42EP3;RPS13
pallidum (globus pallidus complex)	3/301	0.997054	0.999996	0	0	0.297871	0.000878963	ACTN1;CRABP1;CDC42EP3
para-abducens nucleus	3/301	0.997054	0.999996	0	0	0.297871	0.000878963	YARS;RGS5;AGRN
parvocellular part of the r9LRt	3/301	0.997054	0.999996	0	0	0.297871	0.000878963	TOP2A;NRG4;TIMP1
periventricular stratum of r1Ve	3/301	0.997054	0.999996	0	0	0.297871	0.000878963	TTR;ITGB2;DBI
periventricular stratum of r5BM	3/301	0.997054	0.999996	0	0	0.297871	0.000878963	LGALS1;GDF15;CEBPG
periventricular stratum of the VAP	3/301	0.997054	0.999996	0	0	0.297871	0.000878963	NR2F1;HDGF;ILF2
plexiform layer of TuPal	3/301	0.997054	0.999996	0	0	0.297871	0.000878963	CDC42EP3;LAPTM5;TRIB3
polymorph layer of TuPal	3/301	0.997054	0.999996	0	0	0.297871	0.000878963	TSC22D1;CDC42EP3;RPS13
polymorph layer of TuStr	3/301	0.997054	0.999996	0	0	0.297871	0.000878963	CDC42EP3;YBX1;GATA2
pontine hindbrain	3/301	0.997054	0.999996	0	0	0.297871	0.000878963	KIF5B;SPP1;HMGA1
pregeniculate nucleus	3/301	0.997054	0.999996	0	0	0.297871	0.000878963	RGS16;UNC5C;LSS
r1 part of principal trigeminal sensory nucleus	3/301	0.997054	0.999996	0	0	0.297871	0.000878963	RBM39;LGALS1;NEUROG2
r1 part of vestibular nucleus Y	3/301	0.997054	0.999996	0	0	0.297871	0.000878963	TTR;ITGB2;DBI
r10 part of basomedial reticular formation	3/301	0.997054	0.999996	0	0	0.297871	0.000878963	TOP2A;LGALS1;YWHAZ
r10 part of spinal trigeminal nucleus, caudal part	3/301	0.997054	0.999996	0	0	0.297871	0.000878963	EBF3;TNRC18;ATP9A
r10 part of spinal vestibular nucleus	3/301	0.997054	0.999996	0	0	0.297871	0.000878963	MMP14;IGFBP3;UBA1
r2 alar plate	3/301	0.997054	0.999996	0	0	0.297871	0.000878963	LGALS1;SPP1;LSS
r2 part of basointermediate reticular formation	3/301	0.997054	0.999996	0	0	0.297871	0.000878963	YARS;SPP1;AP2M1
r2 part of trigeminal sensory column	3/301	0.997054	0.999996	0	0	0.297871	0.000878963	LGALS1;SPP1;LSS
r3 part of anteroventral cochlear nucleus	3/301	0.997054	0.999996	0	0	0.297871	0.000878963	IGFBP2;PLIN2;WLS
r3 part of basolateral reticular formation	3/301	0.997054	0.999996	0	0	0.297871	0.000878963	YARS;LRBA;SPP1
r3 part of ventral lateral lemniscal nucleus	3/301	0.997054	0.999996	0	0	0.297871	0.000878963	TOP2A;NRG4;SPP1
r3 part of ventral parvicellular reticular formation	3/301	0.997054	0.999996	0	0	0.297871	0.000878963	LRBA;CAPRIN1;LCP1
r4 part of basointermediate reticular formation	3/301	0.997054	0.999996	0	0	0.297871	0.000878963	PRKDC;SPP1;AGRN
r4 part of basolateral reticular formation	3/301	0.997054	0.999996	0	0	0.297871	0.000878963	LRBA;SPP1;MMP9
r4 part of magnocellular medial vestibular nucleus	3/301	0.997054	0.999996	0	0	0.297871	0.000878963	LRBA;CAPRIN1;SOX11
r4 part of medial pontine nuclei	3/301	0.997054	0.999996	0	0	0.297871	0.000878963	AHNAK;SPP1;YWHAZ
r4 part of pontine raphe cell population	3/301	0.997054	0.999996	0	0	0.297871	0.000878963	YARS;SPP1;ZMPSTE24
r5 alar plate	3/301	0.997054	0.999996	0	0	0.297871	0.000878963	LGALS1;TTR;HNRNPA2B1
r5 part of basomedial reticular formation	3/301	0.997054	0.999996	0	0	0.297871	0.000878963	YARS;SPP1;HSPG2
r5 part of the oral Sp5 subnucleus	3/301	0.997054	0.999996	0	0	0.297871	0.000878963	APEX1;HNRNPA2B1;LAPTM5
r5 part of the vestibular column	3/301	0.997054	0.999996	0	0	0.297871	0.000878963	TTR;IGFBP2;SOX11
r6 basal plate	3/301	0.997054	0.999996	0	0	0.297871	0.000878963	YARS;SYT4;TRIB3
r6 part of magnocellular medial vestibular nucleus	3/301	0.997054	0.999996	0	0	0.297871	0.000878963	YARS;SOX11;PHOX2A
r6 part of posteroventral cochlear nucleus	3/301	0.997054	0.999996	0	0	0.297871	0.000878963	CCL20;LCP1;WLS
r6 part of the vestibular column	3/301	0.997054	0.999996	0	0	0.297871	0.000878963	TTR;ITGB2;SOX11
r6 part of trigeminal transition zone	3/301	0.997054	0.999996	0	0	0.297871	0.000878963	SLC10A4;LGALS1;KIF5B
r7 alar plate	3/301	0.997054	0.999996	0	0	0.297871	0.000878963	ACLY;TAGLN2;EIF4B
r7 part of basolateral reticular formation	3/301	0.997054	0.999996	0	0	0.297871	0.000878963	NRG4;ZMPSTE24;PHOX2A
r7 part of dorsal parvicellular reticular formation	3/301	0.997054	0.999996	0	0	0.297871	0.000878963	SOX11;EIF4B;ZMPSTE24
r7 part of paragigantocellular nucleus	3/301	0.997054	0.999996	0	0	0.297871	0.000878963	FCER1G;SNCG;MKI67
r7 part of the basointermediate reticular formation	3/301	0.997054	0.999996	0	0	0.297871	0.000878963	SNCG;FGFBP3;PHOX2A
r7 part of the trigeminal column	3/301	0.997054	0.999996	0	0	0.297871	0.000878963	MAB21L2;TAGLN2;EIF4B
r7 part of ventral gigangocellular reticular area	3/301	0.997054	0.999996	0	0	0.297871	0.000878963	ACLY;TRIB3;MKI67
r8 part of basointermediate reticular formation	3/301	0.997054	0.999996	0	0	0.297871	0.000878963	TOP2A;SNCG;MKI67
r8 part of basomedial reticular formation	3/301	0.997054	0.999996	0	0	0.297871	0.000878963	YARS;DNAJA1;LGALS1
r8 part of gigantocellular reticular area	3/301	0.997054	0.999996	0	0	0.297871	0.000878963	GDF15;SNCG;MKI67
r8 part of inferior olive	3/301	0.997054	0.999996	0	0	0.297871	0.000878963	IGFBP3;RPL27;PBX1
r8 part of the paragigantocellular nucleus	3/301	0.997054	0.999996	0	0	0.297871	0.000878963	TOP2A;IGFBP3;MKI67
r8 part of ventral parvicellular reticular formation	3/301	0.997054	0.999996	0	0	0.297871	0.000878963	ACLY;LGALS1;EIF4B
r9 basal plate	3/301	0.997054	0.999996	0	0	0.297871	0.000878963	TOP2A;LGALS1;MKI67
r9 part of the inferior olive	3/301	0.997054	0.999996	0	0	0.297871	0.000878963	TOP2A;TRIM28;SMARCA4
r9 part of the trigeminal column	3/301	0.997054	0.999996	0	0	0.297871	0.000878963	MAB21L2;TAGLN2;EIF4B
retropontine reticular area	3/301	0.997054	0.999996	0	0	0.297871	0.000878963	TMEFF1;FCER1G;HSPG2
striatal part of olfactory tuberculum	3/301	0.997054	0.999996	0	0	0.297871	0.000878963	CDC42EP3;ID4;YBX1
sublayer 6b of InsCx	3/301	0.997054	0.999996	0	0	0.297871	0.000878963	TMEFF1;ACAP3;FASN
superficial stratum of Ist	3/301	0.997054	0.999996	0	0	0.297871	0.000878963	RBM39;S100A6;NEUROG2
superficial stratum of PHyB-D	3/301	0.997054	0.999996	0	0	0.297871	0.000878963	GRN;PEG10;IGF2
superficial stratum of Str	3/301	0.997054	0.999996	0	0	0.297871	0.000878963	CDC42EP3;ID4;YBX1
superficial stratum of THyB-D	3/301	0.997054	0.999996	0	0	0.297871	0.000878963	VAT1;TRIM28;SMC4
superficial stratum of THyB-P	3/301	0.997054	0.999996	0	0	0.297871	0.000878963	AHNAK;RPL12;RPS13
superficial stratum of THyB-V	3/301	0.997054	0.999996	0	0	0.297871	0.000878963	FCER1G;TRIM28;RPL12
superficial stratum of p3ZL	3/301	0.997054	0.999996	0	0	0.297871	0.000878963	RGS16;UNC5C;LSS
[truncated: 190 more rows]

## Sheet: Allen Brain Atlas down
Term	Overlap	P-value	Adjusted P-value	Old P-value	Old Adjusted P-value	Odds Ratio	Combined Score	Genes
[truncated: 2,177 more rows]

[truncated: 9 more sheets: Disease Perturbations from GEO down, Disease Perturbations from GEO up, DAVID, GAD DISEASE, DAVID, GAD DISEASE CLASS, DrugMatrix, DSigDB, TargetScan microRNA 2017, miRTarBase 2017, g profiler]
